# Supplementary material
Source: publisher figshare collection journal article supplement (https://plos.figshare.com/articles/dataset/_/1479546)
Supplement: Supplementary file [file 1]

## Appendix-I

Our raw data are counted by each secondary medical zone.  
And we used only "Total" columns in our study.

Column "Num per year": the number of suicide as an average by year.  
Column "Rate /100,000": the death rate per 100,000 persons.  
Column "x100": the ratio (%) for an average of all area.

Secondary Medical Zone ID: 001

|                 | Male            |                  |       |                 |                  |       | Female          |                  |       |                 |                  |       |
|-----------------|-----------------|------------------|-------|-----------------|------------------|-------|-----------------|------------------|-------|-----------------|------------------|-------|
|                 | Suicide         |                  |       | Suicide         |                  |       | Suicide         |                  |       | Suicide         |                  |       |
|                 | Num<br>per year | Rate<br>/100,000 | × 100 | Num<br>per year | Rate<br>/100,000 | × 100 | Num<br>per year | Rate<br>/100,000 | × 100 | Num<br>per year | Rate<br>/100,000 | × 100 |
|                 |                 |                  |       |                 |                  |       |                 |                  |       |                 |                  |       |
| Total (>10 y/o) | 45–54           | Total (>10 y/o)  | 45–54 |                 |                  |       |                 |                  |       |                 |                  |       |
| 1983–1987       | 71.6            | 29.3             | 86.9  | 20.6            | 53.5             | 105.8 | 38.6            | 13.6             | 77.2  | 7.2             | 18.4             | 107.0 |
| 1988–1992       | 49.2            | 25.0             | 101.2 | 9.4             | 31.8             | 92.7  | 32.6            | 12.6             | 98.3  | 4.2             | 13.1             | 89.4  |
| 1993–1997       | 51.8            | 25.7             | 104.6 | 15.8            | 46.3             | 126.5 | 26.8            | 10.4             | 95.7  | 4.8             | 13.0             | 100.5 |
| 1998–2002       | 88.0            | 42.1             | 120.2 | 20.2            | 60.7             | 108.5 | 31.2            | 12.0             | 94.7  | 5.6             | 15.2             | 100.8 |
| 2003–2007       | 93.8            | 46.2             | 129.7 | 22.8            | 78.8             | 140.9 | 34.0            | 13.8             | 107.2 | 5.8             | 16.7             | 122.1 |
| 2008–2012       | 80.0            | 41.5             | 123.1 | 15.8            | 63.7             | 131.0 | 33.0            | 14.3             | 107.7 | 5.2             | 17.8             | 119.1 |
|                 | 15–24           |                  |       | 55–64           |                  |       | 15–24           |                  |       | 55–64           |                  |       |
| 1983–1987       | 4.8             | 9.9              | 70.7  | 11.0            | 37.6             | 88.4  | 3.2             | 7.2              | 106.0 | 5.4             | 16.9             | 85.7  |
| 1988–1992       | 2.8             | 9.1              | 92.0  | 9.6             | 35.0             | 98.5  | 1.4             | 4.6              | 87.6  | 6.0             | 18.4             | 103.3 |
| 1993–1997       | 3.0             | 10.8             | 95.1  | 12.2            | 44.1             | 109.5 | 1.0             | 4.1              | 78.9  | 5.8             | 17.3             | 109.1 |
| 1998–2002       | 4.4             | 17.0             | 107.3 | 20.0            | 71.2             | 112.1 | 1.6             | 6.7              | 95.1  | 7.4             | 21.1             | 112.3 |
| 2003–2007       | 3.6             | 17.3             | 99.1  | 25.0            | 78.3             | 135.6 | 1.6             | 8.3              | 92.2  | 6.4             | 17.4             | 104.0 |
| 2008–2012       | 4.6             | 24.2             | 114.3 | 20.4            | 61.0             | 125.6 | 2.6             | 12.8             | 132.0 | 6.0             | 15.9             | 106.4 |
|                 | 25–34           |                  |       | 65–74           |                  |       | 25–34           |                  |       | 65–74           |                  |       |
| 1983–1987       | 10.4            | 26.7             | 104.3 | 6.2             | 34.0             | 77.6  | 4.4             | 11.6             | 107.5 | 6.0             | 23.5             | 75.1  |
| 1988–1992       | 7.0             | 25.2             | 132.0 | 5.8             | 34.6             | 98.1  | 2.8             | 9.2              | 105.8 | 6.8             | 28.4             | 108.7 |
| 1993–1997       | 4.6             | 19.2             | 98.4  | 7.0             | 34.2             | 107.2 | 1.0             | 5.6              | 66.7  | 5.8             | 21.4             | 109.6 |
| 1998–2002       | 12.0            | 41.0             | 151.8 | 12.6            | 52.3             | 115.0 | 2.0             | 9.0              | 77.7  | 4.8             | 17.4             | 82.8  |
| 2003–2007       | 10.8            | 41.1             | 132.5 | 9.6             | 40.5             | 94.4  | 4.0             | 14.6             | 112.5 | 7.8             | 23.6             | 126.6 |
| 2008–2012       | 7.2             | 35.2             | 108.1 | 11.6            | 46.1             | 116.7 | 3.2             | 15.1             | 105.1 | 6.0             | 18.9             | 106.0 |
|                 | 35–44           |                  |       | >74 y/o         |                  |       | 35–44           |                  |       | >74 y/o         |                  |       |
| 1983–1987       | 13.0            | 30.4             | 95.5  | 5.0             | 39.8             | 50.9  | 7.2             | 15.2             | 128.7 | 5.2             | 19.7             | 34.2  |
| 1988–1992       | 9.4             | 26.1             | 110.2 | 5.0             | 54.8             | 85.0  | 5.6             | 12.7             | 131.7 | 5.8             | 35.3             | 73.9  |
| 1993–1997       | 5.2             | 19.2             | 78.3  | 4.0             | 41.9             | 80.4  | 3.0             | 9.0              | 105.3 | 5.4             | 29.5             | 85.8  |
| 1998–2002       | 12.8            | 48.1             | 136.7 | 6.0             | 48.6             | 92.1  | 2.2             | 8.7              | 84.4  | 7.2             | 30.5             | 98.1  |
| 2003–2007       | 14.8            | 58.4             | 145.7 | 7.0             | 43.0             | 95.6  | 5.0             | 16.1             | 127.5 | 3.4             | 12.7             | 56.6  |
| 2008–2012       | 14.8            | 52.6             | 141.5 | 5.4             | 29.9             | 72.1  | 3.6             | 13.4             | 98.8  | 6.4             | 18.1             | 94.4  |

Secondary Medical Zone ID: 002

|           | Male            |                  |       |                 |                  |       | Female          |                  |       |                 |                  |       |
|-----------|-----------------|------------------|-------|-----------------|------------------|-------|-----------------|------------------|-------|-----------------|------------------|-------|
|           | Suicide         |                  |       | Suicide         |                  |       | Suicide         |                  |       | Suicide         |                  |       |
|           | Num<br>per year | Rate<br>/100,000 | × 100 | Num<br>per year | Rate<br>/100,000 | × 100 | Num<br>per year | Rate<br>/100,000 | × 100 | Num<br>per year | Rate<br>/100,000 | × 100 |
|           |                 |                  |       |                 |                  |       |                 |                  |       |                 |                  |       |
|           | Total (>10 y/o) |                  |       | 45–54           |                  |       | Total (>10 y/o) |                  |       | 45–54           |                  |       |
| 1983–1987 | 4.6             | 27.6             | 65.8  | 1.0             | 39.0             | 77.1  | 3.4             | 13.6             | 75.2  | 0.4             | 15.9             | 92.5  |
| 1988–1992 | 5.2             | 25.2             | 109.0 | 1.6             | 41.7             | 121.4 | 3.0             | 12.7             | 100.9 | 0.4             | 14.5             | 99.4  |
| 1993–1997 | 5.0             | 25.7             | 110.7 | 0.8             | 35.8             | 97.8  | 2.6             | 10.9             | 106.4 | 0.6             | 14.1             | 109.1 |
| 1998–2002 | 6.4             | 35.9             | 105.9 | 1.2             | 53.8             | 96.1  | 2.2             | 12.4             | 96.2  | 0.2             | 14.2             | 94.7  |
| 2003–2007 | 5.0             | 35.5             | 96.6  | 1.2             | 56.2             | 100.5 | 1.8             | 12.4             | 94.9  | 0.8             | 16.2             | 118.3 |
| 2008–2012 | 4.2             | 34.2             | 98.1  | 0.2             | 41.7             | 85.8  | 2.0             | 12.8             | 100.2 | 0.2             | 14.7             | 98.3  |
|           | 15–24           |                  |       | 55–64           |                  |       | 15–24           |                  |       | 55–64           |                  |       |
| 1983–1987 | 0.4             | 12.3             | 88.1  | 0.8             | 36.5             | 85.9  | 0.2             | 6.7              | 97.9  | 0.8             | 20.7             | 104.9 |
| 1988–1992 | 0.4             | 10.7             | 108.3 | 1.0             | 36.2             | 101.9 | 0.0             | 4.8              | 91.5  | 0.8             | 19.7             | 110.4 |
| 1993–1997 | 0.0             | 10.4             | 91.9  | 1.0             | 40.4             | 100.4 | 0.0             | 4.8              | 92.9  | 0.4             | 15.8             | 99.5  |
| 1998–2002 | 0.0             | 14.4             | 91.1  | 1.6             | 66.2             | 104.1 | 0.0             | 6.6              | 93.7  | 0.2             | 17.4             | 92.6  |
| 2003–2007 | 0.4             | 18.7             | 107.1 | 1.2             | 57.1             | 99.0  | 0.0             | 8.4              | 93.1  | 0.0             | 14.9             | 88.7  |
| 2008–2012 | 0.2             | 21.4             | 101.0 | 0.6             | 44.6             | 91.9  | 0.0             | 9.2              | 94.8  | 0.4             | 15.1             | 101.4 |
|           | 25–34           |                  |       | 65–74           |                  |       | 25–34           |                  |       | 65–74           |                  |       |
| 1983–1987 | 0.8             | 24.2             | 94.8  | 0.6             | 37.1             | 84.7  | 0.2             | 10.0             | 93.3  | 1.0             | 31.2             | 100.0 |
| 1988–1992 | 0.0             | 15.2             | 79.3  | 0.6             | 35.6             | 101.2 | 0.0             | 7.8              | 89.7  | 0.2             | 21.2             | 81.4  |
| 1993–1997 | 0.2             | 18.3             | 93.7  | 1.4             | 44.2             | 138.4 | 0.0             | 7.7              | 92.1  | 0.8             | 23.4             | 119.8 |
| 1998–2002 | 0.6             | 27.8             | 103.1 | 1.4             | 51.3             | 112.7 | 0.0             | 10.7             | 92.2  | 0.6             | 21.8             | 103.9 |
| 2003–2007 | 0.0             | 26.5             | 85.4  | 0.8             | 42.1             | 98.1  | 0.0             | 12.0             | 92.0  | 0.2             | 16.9             | 90.8  |
| 2008–2012 | 1.0             | 37.1             | 113.9 | 0.8             | 40.5             | 102.6 | 0.0             | 13.5             | 94.1  | 0.4             | 17.8             | 100.0 |
|           | 35–44           |                  |       | >74 y/o         |                  |       | 35–44           |                  |       | >74 y/o         |                  |       |
| 1983–1987 | 0.8             | 28.0             | 87.9  | 0.0             | 35.6             | 45.5  | 0.2             | 10.9             | 91.9  | 0.6             | 25.0             | 43.4  |
| 1988–1992 | 1.2             | 28.3             | 119.4 | 0.4             | 54.5             | 84.5  | 0.6             | 11.0             | 113.8 | 1.0             | 50.7             | 105.9 |
| 1993–1997 | 0.8             | 27.0             | 110.2 | 0.8             | 59.2             | 113.7 | 0.2             | 8.5              | 100.4 | 0.6             | 34.7             | 100.8 |
| 1998–2002 | 0.4             | 32.0             | 90.9  | 1.2             | 65.4             | 124.1 | 0.2             | 10.4             | 100.4 | 1.0             | 37.6             | 121.1 |
| 2003–2007 | 0.6             | 39.2             | 97.8  | 0.8             | 47.7             | 105.9 | 0.2             | 12.6             | 100.0 | 0.6             | 22.7             | 101.0 |
| 2008–2012 | 0.8             | 39.1             | 105.1 | 0.6             | 39.9             | 96.2  | 0.2             | 13.6             | 100.2 | 0.8             | 21.7             | 112.8 |

Secondary Medical Zone ID: 003

|           | Male            |                  |       |                 |                  |       | Female          |                  |       |                 |                  |       |
|-----------|-----------------|------------------|-------|-----------------|------------------|-------|-----------------|------------------|-------|-----------------|------------------|-------|
|           | Suicide         |                  |       | Suicide         |                  |       | Suicide         |                  |       | Suicide         |                  |       |
|           | Num<br>per year | Rate<br>/100,000 | × 100 | Num<br>per year | Rate<br>/100,000 | × 100 | Num<br>per year | Rate<br>/100,000 | × 100 | Num<br>per year | Rate<br>/100,000 | × 100 |
|           |                 |                  |       |                 |                  |       |                 |                  |       |                 |                  |       |
|           | Total (>10 y/o) |                  |       | 45–54           |                  |       | Total (>10 y/o) |                  |       | 45–54           |                  |       |
| 1983–1987 | 9.0             | 32.0             | 96.0  | 2.0             | 47.9             | 94.7  | 2.8             | 13.0             | 70.1  | 0.6             | 16.3             | 94.5  |
| 1988–1992 | 6.8             | 24.9             | 105.9 | 1.4             | 36.1             | 105.2 | 4.0             | 12.7             | 99.2  | 0.2             | 13.1             | 89.3  |
| 1993–1997 | 5.0             | 24.0             | 89.3  | 1.6             | 39.0             | 106.5 | 3.8             | 11.0             | 106.7 | 0.6             | 13.4             | 103.9 |
| 1998–2002 | 8.0             | 35.2             | 95.9  | 2.0             | 55.3             | 98.9  | 3.8             | 12.6             | 101.0 | 0.4             | 14.4             | 95.5  |
| 2003–2007 | 8.8             | 38.2             | 106.2 | 2.6             | 67.0             | 119.8 | 3.8             | 12.7             | 105.6 | 0.8             | 15.4             | 112.6 |
| 2008–2012 | 6.8             | 34.2             | 99.0  | 2.0             | 56.4             | 116.0 | 2.2             | 12.5             | 92.4  | 0.6             | 16.1             | 108.0 |
|           | 15–24           |                  |       | 55–64           |                  |       | 15–24           |                  |       | 55–64           |                  |       |
| 1983–1987 | 1.4             | 19.8             | 141.6 | 1.0             | 36.0             | 84.7  | 0.0             | 5.8              | 84.3  | 0.8             | 19.6             | 99.2  |
| 1988–1992 | 0.6             | 11.2             | 112.7 | 0.6             | 27.9             | 78.6  | 0.0             | 4.6              | 88.1  | 0.4             | 16.0             | 89.7  |
| 1993–1997 | 0.0             | 9.9              | 87.6  | 1.2             | 38.4             | 95.3  | 0.0             | 4.7              | 89.7  | 0.6             | 15.9             | 99.9  |
| 1998–2002 | 0.2             | 14.7             | 93.1  | 2.0             | 63.9             | 100.6 | 0.0             | 6.4              | 90.9  | 0.8             | 19.5             | 103.7 |
| 2003–2007 | 0.2             | 16.6             | 95.2  | 1.6             | 55.1             | 95.5  | 0.0             | 8.1              | 89.7  | 1.0             | 18.5             | 110.8 |
| 2008–2012 | 0.2             | 20.2             | 95.4  | 0.6             | 40.6             | 83.5  | 0.0             | 8.8              | 91.0  | 0.6             | 15.2             | 101.9 |
|           | 25–34           |                  |       | 65–74           |                  |       | 25–34           |                  |       | 65–74           |                  |       |
| 1983–1987 | 0.6             | 21.6             | 84.6  | 1.2             | 45.1             | 103.1 | 0.0             | 8.5              | 78.8  | 0.6             | 26.1             | 83.7  |
| 1988–1992 | 0.8             | 21.0             | 110.0 | 1.6             | 45.4             | 128.7 | 0.4             | 9.3              | 107.0 | 0.8             | 25.9             | 99.4  |
| 1993–1997 | 0.6             | 20.3             | 103.8 | 0.8             | 30.6             | 95.8  | 0.4             | 9.1              | 109.4 | 1.4             | 26.5             | 135.9 |
| 1998–2002 | 0.6             | 26.2             | 97.0  | 1.4             | 45.3             | 99.7  | 0.2             | 11.2             | 96.7  | 1.0             | 23.0             | 109.5 |
| 2003–2007 | 0.8             | 31.2             | 100.7 | 0.8             | 38.0             | 88.5  | 0.0             | 11.5             | 88.7  | 0.8             | 19.7             | 105.8 |
| 2008–2012 | 0.2             | 29.2             | 89.8  | 0.8             | 37.7             | 95.3  | 0.0             | 13.0             | 90.5  | 0.0             | 14.8             | 83.1  |
|           | 35–44           |                  |       | >74 y/o         |                  |       | 35–44           |                  |       | >74 y/o         |                  |       |
| 1983–1987 | 1.6             | 34.0             | 107.0 | 1.2             | 70.7             | 90.3  | 0.2             | 10.4             | 88.4  | 0.6             | 31.0             | 53.7  |
| 1988–1992 | 1.2             | 25.7             | 108.6 | 0.4             | 49.4             | 76.6  | 0.6             | 10.5             | 108.4 | 1.6             | 58.5             | 122.3 |
| 1993–1997 | 0.4             | 20.3             | 82.7  | 0.4             | 41.2             | 79.1  | 0.0             | 7.1              | 83.9  | 0.8             | 32.0             | 93.1  |
| 1998–2002 | 0.8             | 32.9             | 93.5  | 0.8             | 48.3             | 91.6  | 0.4             | 10.9             | 105.4 | 1.0             | 30.7             | 98.9  |
| 2003–2007 | 1.6             | 48.6             | 121.2 | 1.2             | 46.6             | 103.5 | 0.2             | 12.1             | 95.9  | 1.0             | 23.9             | 106.6 |
| 2008–2012 | 1.0             | 38.2             | 102.6 | 2.0             | 52.3             | 126.0 | 0.2             | 13.1             | 96.9  | 0.8             | 18.8             | 97.7  |

Secondary Medical Zone ID: 004

|           | Male            |          |       |          |          |       | Female          |          |       |          |          |       |
|-----------|-----------------|----------|-------|----------|----------|-------|-----------------|----------|-------|----------|----------|-------|
|           | Suicide         |          |       | Suicide  |          |       | Suicide         |          |       | Suicide  |          |       |
|           | Num             | Rate     | × 100 | Num      | Rate     | × 100 | Num             | Rate     | × 100 | Num      | Rate     | × 100 |
|           | per year        | /100,000 |       | per year | /100,000 |       | per year        | /100,000 |       | per year | /100,000 |       |
|           | Total (>10 y/o) |          |       | 45–54    |          |       | Total (>10 y/o) |          |       | 45–54    |          |       |
| 1983–1987 | 239.2           | 30.8     | 95.8  | 61.2     | 52.3     | 103.5 | 103.6           | 12.6     | 80.7  | 20.4     | 17.0     | 98.5  |
| 1988–1992 | 188.4           | 23.0     | 94.0  | 42.0     | 32.9     | 95.9  | 92.6            | 10.3     | 79.4  | 17.4     | 12.7     | 87.2  |
| 1993–1997 | 217.6           | 23.7     | 94.5  | 58.2     | 37.4     | 102.3 | 89.0            | 8.6      | 78.0  | 15.8     | 9.6      | 74.3  |
| 1998–2002 | 376.6           | 37.4     | 104.5 | 101.4    | 60.8     | 108.6 | 138.8           | 12.0     | 93.3  | 30.2     | 16.3     | 108.1 |
| 2003–2007 | 390.8           | 37.4     | 101.0 | 98.4     | 64.0     | 114.5 | 152.6           | 12.7     | 97.7  | 26.4     | 15.4     | 112.4 |
| 2008–2012 | 367.6           | 34.5     | 98.8  | 73.0     | 50.9     | 104.7 | 163.6           | 13.3     | 100.1 | 24.6     | 15.3     | 102.7 |
|           | 15–24           |          |       | 55–64    |          |       | 15–24           |          |       | 55–64    |          |       |
| 1983–1987 | 20.6            | 12.1     | 87.0  | 34.4     | 41.5     | 97.7  | 10.4            | 6.5      | 95.7  | 13.0     | 15.2     | 76.9  |
| 1988–1992 | 19.2            | 10.9     | 109.7 | 30.0     | 30.3     | 85.3  | 9.8             | 5.8      | 110.2 | 15.8     | 15.1     | 84.5  |
| 1993–1997 | 17.6            | 10.0     | 88.6  | 41.8     | 37.4     | 92.8  | 7.4             | 4.4      | 84.5  | 15.0     | 12.4     | 78.3  |
| 1998–2002 | 26.4            | 16.2     | 102.6 | 83.2     | 65.7     | 103.5 | 8.8             | 5.8      | 82.1  | 23.2     | 16.6     | 87.9  |
| 2003–2007 | 24.6            | 16.6     | 95.4  | 83.0     | 54.4     | 94.2  | 14.8            | 10.3     | 114.0 | 25.8     | 15.1     | 90.3  |
| 2008–2012 | 29.0            | 22.3     | 105.2 | 86.8     | 51.4     | 105.7 | 14.6            | 11.4     | 117.3 | 28.6     | 15.1     | 101.2 |
|           | 25–34           |          |       | 65–74    |          |       | 25–34           |          |       | 65–74    |          |       |
| 1983–1987 | 40.8            | 26.6     | 104.0 | 15.6     | 35.6     | 81.2  | 18.8            | 11.9     | 110.1 | 13.4     | 24.7     | 79.1  |
| 1988–1992 | 24.0            | 17.0     | 89.0  | 19.2     | 36.1     | 102.5 | 11.6            | 7.7      | 89.3  | 13.4     | 20.5     | 78.6  |
| 1993–1997 | 27.4            | 18.5     | 94.6  | 18.4     | 25.9     | 81.2  | 10.8            | 6.9      | 82.5  | 12.0     | 14.4     | 73.7  |
| 1998–2002 | 52.6            | 32.5     | 120.2 | 38.4     | 42.2     | 92.9  | 23.6            | 13.5     | 116.3 | 19.8     | 18.8     | 89.7  |
| 2003–2007 | 53.6            | 32.8     | 105.6 | 39.6     | 38.6     | 89.9  | 21.8            | 12.6     | 96.9  | 18.4     | 15.3     | 82.1  |
| 2008–2012 | 48.0            | 33.1     | 101.6 | 40.2     | 35.1     | 88.8  | 23.8            | 15.2     | 105.9 | 23.8     | 17.2     | 96.8  |
|           | 35–44           |          |       | >74 y/o  |          |       | 35–44           |          |       | >74 y/o  |          |       |
| 1983–1987 | 53.0            | 32.4     | 101.8 | 12.4     | 52.2     | 66.6  | 16.8            | 10.1     | 85.3  | 9.8      | 23.9     | 41.5  |
| 1988–1992 | 40.4            | 24.0     | 101.4 | 13.2     | 49.9     | 77.4  | 11.6            | 6.8      | 70.6  | 12.6     | 29.5     | 61.6  |
| 1993–1997 | 39.2            | 25.4     | 103.7 | 14.6     | 43.1     | 82.8  | 11.8            | 7.3      | 85.6  | 15.8     | 27.6     | 80.2  |
| 1998–2002 | 54.8            | 37.7     | 107.0 | 18.6     | 40.6     | 76.9  | 15.4            | 9.8      | 94.9  | 17.4     | 22.2     | 71.5  |
| 2003–2007 | 67.6            | 44.2     | 110.2 | 23.2     | 35.7     | 79.2  | 24.6            | 14.6     | 115.3 | 20.6     | 19.1     | 85.0  |
| 2008–2012 | 59.0            | 35.4     | 95.2  | 29.6     | 34.6     | 83.5  | 24.2            | 13.5     | 99.5  | 23.4     | 16.7     | 87.1  |

Secondary Medical Zone ID: 005

|                 | Male            |                  |       |                 |                  |       | Female          |                  |       |                 |                  |       |
|-----------------|-----------------|------------------|-------|-----------------|------------------|-------|-----------------|------------------|-------|-----------------|------------------|-------|
|                 | Suicide         |                  |       | Suicide         |                  |       | Suicide         |                  |       | Suicide         |                  |       |
|                 | Num<br>per year | Rate<br>/100,000 | × 100 | Num<br>per year | Rate<br>/100,000 | × 100 | Num<br>per year | Rate<br>/100,000 | × 100 | Num<br>per year | Rate<br>/100,000 | × 100 |
|                 |                 |                  |       |                 |                  |       |                 |                  |       |                 |                  |       |
| Total (>10 y/o) | 45–54           | Total (>10 y/o)  | 45–54 |                 |                  |       |                 |                  |       |                 |                  |       |
| 1983–1987       | 45.8            | 27.9             | 79.8  | 12.4            | 46.2             | 91.4  | 24.2            | 12.5             | 70.6  | 4.0             | 15.8             | 91.5  |
| 1988–1992       | 35.2            | 25.6             | 105.5 | 9.0             | 42.5             | 123.6 | 22.6            | 12.9             | 100.6 | 4.4             | 17.2             | 117.8 |
| 1993–1997       | 29.0            | 23.6             | 91.3  | 6.2             | 33.0             | 90.1  | 15.0            | 9.6              | 85.0  | 2.2             | 11.2             | 86.6  |
| 1998–2002       | 42.4            | 34.3             | 94.0  | 10.2            | 53.2             | 95.1  | 19.4            | 12.0             | 94.1  | 2.2             | 12.5             | 83.1  |
| 2003–2007       | 42.2            | 36.6             | 97.0  | 9.0             | 55.4             | 99.1  | 12.0            | 10.8             | 71.9  | 3.6             | 17.1             | 125.0 |
| 2008–2012       | 41.8            | 38.1             | 108.4 | 9.2             | 61.5             | 126.5 | 11.2            | 10.8             | 74.7  | 1.0             | 11.3             | 75.6  |
|                 | 15–24           |                  |       | 55–64           |                  |       | 15–24           |                  |       | 55–64           |                  |       |
| 1983–1987       | 1.8             | 6.9              | 49.1  | 8.6             | 39.0             | 91.8  | 1.6             | 6.1              | 88.9  | 3.4             | 15.4             | 78.1  |
| 1988–1992       | 2.2             | 10.3             | 104.0 | 9.0             | 42.8             | 120.5 | 1.0             | 5.1              | 96.7  | 3.4             | 16.2             | 90.8  |
| 1993–1997       | 2.0             | 11.5             | 101.5 | 6.4             | 36.0             | 89.4  | 0.6             | 4.4              | 84.4  | 3.2             | 15.2             | 95.8  |
| 1998–2002       | 1.6             | 13.5             | 85.8  | 11.8            | 66.1             | 104.0 | 1.0             | 7.0              | 99.4  | 4.8             | 21.0             | 111.5 |
| 2003–2007       | 1.4             | 15.1             | 86.7  | 11.2            | 59.4             | 103.0 | 0.6             | 7.4              | 82.2  | 2.0             | 12.7             | 76.0  |
| 2008–2012       | 2.6             | 24.0             | 113.2 | 9.8             | 51.0             | 105.1 | 0.6             | 8.5              | 88.1  | 2.4             | 13.1             | 88.0  |
|                 | 25–34           |                  |       | 65–74           |                  |       | 25–34           |                  |       | 65–74           |                  |       |
| 1983–1987       | 4.8             | 21.9             | 85.8  | 5.0             | 35.6             | 81.3  | 1.8             | 9.3              | 86.7  | 5.2             | 26.9             | 86.0  |
| 1988–1992       | 3.0             | 19.4             | 101.4 | 4.2             | 33.6             | 95.3  | 1.8             | 9.8              | 112.6 | 4.6             | 26.4             | 101.1 |
| 1993–1997       | 3.4             | 22.2             | 113.8 | 5.0             | 34.0             | 106.5 | 0.8             | 7.0              | 84.0  | 3.2             | 17.7             | 90.6  |
| 1998–2002       | 2.8             | 22.8             | 84.5  | 6.6             | 42.6             | 93.6  | 2.2             | 12.8             | 110.6 | 5.2             | 24.6             | 117.1 |
| 2003–2007       | 4.2             | 31.1             | 100.4 | 5.0             | 34.7             | 80.9  | 1.0             | 10.4             | 80.3  | 2.6             | 15.2             | 81.5  |
| 2008–2012       | 4.8             | 38.2             | 117.4 | 4.8             | 34.7             | 87.9  | 1.4             | 13.9             | 97.2  | 2.2             | 14.2             | 80.0  |
|                 | 35–44           |                  |       | >74 y/o         |                  |       | 35–44           |                  |       | >74 y/o         |                  |       |
| 1983–1987       | 9.0             | 32.1             | 100.8 | 4.2             | 44.6             | 56.9  | 3.6             | 12.5             | 105.9 | 4.6             | 24.3             | 42.1  |
| 1988–1992       | 5.0             | 23.6             | 99.7  | 2.8             | 44.2             | 68.5  | 2.4             | 10.1             | 104.4 | 5.0             | 41.8             | 87.4  |
| 1993–1997       | 3.4             | 21.5             | 87.8  | 2.6             | 37.8             | 72.6  | 1.2             | 7.6              | 88.9  | 3.8             | 29.5             | 85.6  |
| 1998–2002       | 5.0             | 35.2             | 99.9  | 4.2             | 46.7             | 88.5  | 0.4             | 6.7              | 64.9  | 3.6             | 22.8             | 73.5  |
| 2003–2007       | 6.6             | 46.2             | 115.4 | 4.6             | 40.7             | 90.3  | 0.8             | 9.6              | 75.6  | 1.4             | 9.3              | 41.5  |
| 2008–2012       | 6.2             | 41.4             | 111.2 | 4.2             | 33.3             | 80.3  | 0.4             | 9.2              | 67.5  | 3.2             | 14.8             | 76.8  |

Secondary Medical Zone ID: 006

|           | Male            |          |       |          |          |       | Female          |          |       |          |          |       |
|-----------|-----------------|----------|-------|----------|----------|-------|-----------------|----------|-------|----------|----------|-------|
|           | Suicide         |          |       | Suicide  |          |       | Suicide         |          |       | Suicide  |          |       |
|           | Num             | Rate     | × 100 | Num      | Rate     | × 100 | Num             | Rate     | × 100 | Num      | Rate     | × 100 |
|           | per year        | /100,000 |       | per year | /100,000 |       | per year        | /100,000 |       | per year | /100,000 |       |
|           | Total (>10 y/o) |          |       | 45–54    |          |       | Total (>10 y/o) |          |       | 45–54    |          |       |
| 1983–1987 | 41.6            | 29.9     | 88.4  | 11.4     | 50.8     | 100.5 | 17.0            | 12.5     | 64.2  | 5.0      | 20.9     | 121.1 |
| 1988–1992 | 31.0            | 27.8     | 117.4 | 9.4      | 52.7     | 153.3 | 13.8            | 11.8     | 86.2  | 1.8      | 12.7     | 86.9  |
| 1993–1997 | 27.0            | 26.5     | 105.4 | 5.2      | 35.1     | 95.9  | 16.4            | 11.9     | 115.5 | 3.6      | 16.9     | 130.8 |
| 1998–2002 | 41.2            | 39.6     | 112.4 | 11.2     | 68.3     | 122.0 | 17.0            | 12.8     | 105.9 | 2.0      | 13.8     | 91.8  |
| 2003–2007 | 44.8            | 44.5     | 126.1 | 8.6      | 62.9     | 112.5 | 17.4            | 13.7     | 114.5 | 3.2      | 17.8     | 129.8 |
| 2008–2012 | 36.0            | 37.6     | 115.0 | 6.2      | 52.4     | 107.9 | 15.2            | 13.9     | 108.0 | 1.8      | 15.2     | 101.8 |
|           | 15–24           |          |       | 55–64    |          |       | 15–24           |          |       | 55–64    |          |       |
| 1983–1987 | 3.0             | 11.2     | 80.7  | 7.6      | 41.6     | 98.0  | 1.6             | 7.2      | 105.1 | 2.8      | 16.7     | 84.7  |
| 1988–1992 | 1.0             | 8.5      | 85.6  | 6.0      | 36.5     | 102.9 | 1.2             | 6.5      | 123.7 | 2.2      | 15.1     | 84.6  |
| 1993–1997 | 1.6             | 11.6     | 102.7 | 6.2      | 40.9     | 101.6 | 0.8             | 5.6      | 107.5 | 3.8      | 19.8     | 124.3 |
| 1998–2002 | 2.0             | 16.7     | 105.4 | 6.8      | 53.1     | 83.6  | 0.0             | 4.7      | 66.4  | 4.2      | 22.3     | 118.5 |
| 2003–2007 | 1.6             | 17.2     | 98.8  | 11.4     | 73.0     | 126.5 | 1.2             | 10.5     | 116.8 | 2.6      | 16.4     | 97.8  |
| 2008–2012 | 1.4             | 20.0     | 94.2  | 7.6      | 50.4     | 103.8 | 1.0             | 10.8     | 111.2 | 3.2      | 17.1     | 114.9 |
|           | 25–34           |          |       | 65–74    |          |       | 25–34           |          |       | 65–74    |          |       |
| 1983–1987 | 3.4             | 20.6     | 80.8  | 4.4      | 38.2     | 87.3  | 0.4             | 6.5      | 60.2  | 2.8      | 21.4     | 68.4  |
| 1988–1992 | 3.0             | 23.0     | 120.5 | 2.8      | 30.3     | 85.9  | 0.6             | 7.2      | 83.5  | 3.2      | 25.7     | 98.3  |
| 1993–1997 | 2.6             | 22.1     | 113.0 | 2.2      | 22.9     | 71.9  | 0.8             | 7.9      | 94.8  | 2.0      | 16.2     | 83.4  |
| 1998–2002 | 3.6             | 30.0     | 111.2 | 5.8      | 44.6     | 98.1  | 1.6             | 12.7     | 109.2 | 3.2      | 21.1     | 100.7 |
| 2003–2007 | 4.8             | 39.1     | 126.1 | 5.2      | 41.2     | 96.0  | 0.8             | 11.2     | 86.0  | 4.8      | 25.8     | 138.4 |
| 2008–2012 | 4.2             | 39.9     | 122.4 | 7.2      | 52.4     | 132.6 | 1.6             | 16.3     | 113.8 | 2.8      | 18.4     | 103.2 |
|           | 35–44           |          |       | >74 y/o  |          |       | 35–44           |          |       | >74 y/o  |          |       |
| 1983–1987 | 6.2             | 29.8     | 93.7  | 5.2      | 59.0     | 75.4  | 3.2             | 13.8     | 116.8 | 1.2      | 10.6     | 18.3  |
| 1988–1992 | 4.6             | 27.1     | 114.2 | 4.2      | 70.1     | 108.6 | 2.4             | 11.7     | 121.1 | 2.2      | 28.3     | 59.1  |
| 1993–1997 | 5.2             | 33.7     | 137.3 | 4.0      | 60.6     | 116.4 | 1.2             | 8.5      | 100.6 | 4.0      | 39.4     | 114.6 |
| 1998–2002 | 7.0             | 50.3     | 142.9 | 4.8      | 60.4     | 114.6 | 1.2             | 10.1     | 97.9  | 4.8      | 37.4     | 120.5 |
| 2003–2007 | 8.8             | 68.2     | 170.2 | 4.2      | 44.3     | 98.4  | 1.8             | 13.9     | 110.3 | 3.0      | 20.3     | 90.5  |
| 2008–2012 | 5.0             | 42.0     | 113.0 | 4.2      | 38.1     | 91.9  | 1.8             | 14.7     | 108.7 | 3.0      | 17.4     | 90.4  |

Secondary Medical Zone ID: 007

|                 | Male            |                  |       |                 |                  |       | Female          |                  |       |                 |                  |       |
|-----------------|-----------------|------------------|-------|-----------------|------------------|-------|-----------------|------------------|-------|-----------------|------------------|-------|
|                 | Suicide         |                  |       | Suicide         |                  |       | Suicide         |                  |       | Suicide         |                  |       |
|                 | Num<br>per year | Rate<br>/100,000 | × 100 | Num<br>per year | Rate<br>/100,000 | × 100 | Num<br>per year | Rate<br>/100,000 | × 100 | Num<br>per year | Rate<br>/100,000 | × 100 |
|                 |                 |                  |       |                 |                  |       |                 |                  |       |                 |                  |       |
| Total (>10 y/o) | 45–54           | Total (>10 y/o)  | 45–54 |                 |                  |       |                 |                  |       |                 |                  |       |
| 1983–1987       | 31.2            | 33.6             | 104.9 | 8.0             | 52.6             | 104.0 | 14.8            | 14.6             | 92.4  | 2.8             | 18.0             | 104.5 |
| 1988–1992       | 24.0            | 28.5             | 125.7 | 5.6             | 43.3             | 126.1 | 11.6            | 12.6             | 99.2  | 1.0             | 11.9             | 81.7  |
| 1993–1997       | 23.0            | 28.2             | 123.4 | 6.6             | 49.8             | 136.1 | 11.0            | 11.1             | 109.1 | 1.4             | 12.4             | 96.1  |
| 1998–2002       | 29.0            | 39.2             | 114.9 | 8.0             | 70.2             | 125.4 | 13.8            | 13.7             | 116.9 | 1.8             | 15.4             | 102.4 |
| 2003–2007       | 26.4            | 40.2             | 113.0 | 5.8             | 65.2             | 116.6 | 15.2            | 15.0             | 133.6 | 2.2             | 17.2             | 125.6 |
| 2008–2012       | 27.0            | 39.6             | 128.1 | 6.0             | 67.5             | 138.9 | 10.0            | 13.5             | 105.7 | 1.2             | 15.4             | 103.4 |
|                 | 15–24           |                  |       | 55–64           |                  |       | 15–24           |                  |       | 55–64           |                  |       |
| 1983–1987       | 4.0             | 20.0             | 143.3 | 5.2             | 44.1             | 103.9 | 1.0             | 7.0              | 102.3 | 3.0             | 22.2             | 112.5 |
| 1988–1992       | 0.4             | 8.1              | 82.2  | 5.0             | 41.0             | 115.4 | 0.8             | 6.1              | 116.3 | 2.6             | 19.7             | 110.6 |
| 1993–1997       | 0.6             | 10.2             | 90.5  | 4.8             | 42.6             | 105.7 | 0.4             | 5.1              | 97.5  | 2.0             | 16.4             | 102.9 |
| 1998–2002       | 1.2             | 16.6             | 105.1 | 6.2             | 62.6             | 98.6  | 0.4             | 6.8              | 96.3  | 3.6             | 23.9             | 126.7 |
| 2003–2007       | 2.4             | 24.5             | 140.3 | 5.8             | 58.4             | 101.3 | 0.2             | 7.6              | 84.5  | 3.4             | 21.6             | 128.9 |
| 2008–2012       | 1.6             | 25.2             | 118.6 | 5.4             | 52.7             | 108.5 | 0.2             | 8.4              | 86.9  | 1.0             | 13.0             | 87.1  |
|                 | 25–34           |                  |       | 65–74           |                  |       | 25–34           |                  |       | 65–74           |                  |       |
| 1983–1987       | 3.2             | 26.0             | 101.7 | 2.6             | 37.6             | 85.9  | 1.2             | 10.7             | 99.0  | 1.4             | 20.7             | 66.3  |
| 1988–1992       | 2.6             | 25.3             | 132.6 | 2.6             | 36.2             | 102.7 | 0.2             | 6.6              | 76.1  | 3.0             | 30.6             | 117.3 |
| 1993–1997       | 0.6             | 15.0             | 76.7  | 3.0             | 35.1             | 110.2 | 0.2             | 6.7              | 80.7  | 2.2             | 21.4             | 109.7 |
| 1998–2002       | 2.4             | 29.7             | 110.1 | 4.8             | 49.6             | 109.0 | 1.6             | 14.3             | 123.7 | 2.4             | 22.1             | 105.3 |
| 2003–2007       | 2.2             | 32.1             | 103.7 | 2.8             | 35.7             | 83.1  | 1.4             | 15.3             | 117.6 | 2.6             | 21.3             | 114.1 |
| 2008–2012       | 2.8             | 39.2             | 120.5 | 3.6             | 41.3             | 104.5 | 1.4             | 17.3             | 120.7 | 2.8             | 21.4             | 120.4 |
|                 | 35–44           |                  |       | >74 y/o         |                  |       | 35–44           |                  |       | >74 y/o         |                  |       |
| 1983–1987       | 5.2             | 35.5             | 111.4 | 2.6             | 61.5             | 78.5  | 1.6             | 11.5             | 97.7  | 3.8             | 50.7             | 87.9  |
| 1988–1992       | 4.4             | 32.4             | 136.7 | 3.4             | 75.2             | 116.6 | 1.4             | 10.3             | 106.3 | 2.6             | 44.1             | 92.1  |
| 1993–1997       | 3.2             | 30.8             | 125.6 | 4.2             | 76.2             | 146.3 | 0.6             | 7.7              | 90.5  | 4.0             | 49.4             | 143.4 |
| 1998–2002       | 3.2             | 39.4             | 111.9 | 3.2             | 55.9             | 106.1 | 0.6             | 9.5              | 91.7  | 3.4             | 35.4             | 114.1 |
| 2003–2007       | 3.6             | 47.9             | 119.5 | 3.8             | 52.4             | 116.4 | 2.0             | 16.9             | 134.1 | 3.2             | 27.3             | 121.6 |
| 2008–2012       | 3.0             | 40.5             | 108.8 | 4.6             | 52.0             | 125.3 | 1.4             | 15.3             | 113.2 | 2.0             | 17.1             | 89.1  |



Secondary Medical Zone ID: 008

|                 | Male            |                  |       |                 |                  |       | Female          |                  |       |                 |                  |       |
|-----------------|-----------------|------------------|-------|-----------------|------------------|-------|-----------------|------------------|-------|-----------------|------------------|-------|
|                 | Suicide         |                  |       | Suicide         |                  |       | Suicide         |                  |       | Suicide         |                  |       |
|                 | Num<br>per year | Rate<br>/100,000 | × 100 | Num<br>per year | Rate<br>/100,000 | × 100 | Num<br>per year | Rate<br>/100,000 | × 100 | Num<br>per year | Rate<br>/100,000 | × 100 |
|                 |                 |                  |       |                 |                  |       |                 |                  |       |                 |                  |       |
| Total (>10 y/o) | 45–54           | Total (>10 y/o)  | 45–54 |                 |                  |       |                 |                  |       |                 |                  |       |
| 1983–1987       | 9.0             | 33.6             | 108.5 | 2.6             | 56.3             | 111.3 | 4.2             | 15.1             | 96.8  | 0.8             | 17.6             | 102.2 |
| 1988–1992       | 7.4             | 26.2             | 118.5 | 1.8             | 40.4             | 117.6 | 3.0             | 12.2             | 89.9  | 0.4             | 13.9             | 95.0  |
| 1993–1997       | 8.2             | 27.2             | 126.8 | 2.4             | 46.4             | 126.8 | 2.4             | 10.3             | 89.4  | 0.4             | 12.6             | 97.4  |
| 1998–2002       | 8.8             | 36.4             | 109.2 | 2.8             | 68.0             | 121.6 | 4.6             | 13.0             | 112.9 | 0.6             | 15.5             | 103.1 |
| 2003–2007       | 8.4             | 37.9             | 112.3 | 1.8             | 61.9             | 110.8 | 2.8             | 12.3             | 97.3  | 0.2             | 12.9             | 94.5  |
| 2008–2012       | 8.8             | 37.7             | 121.4 | 2.6             | 65.4             | 134.5 | 3.8             | 13.8             | 110.0 | 1.0             | 18.7             | 125.3 |
|                 | 15–24           |                  |       | 55–64           |                  |       | 15–24           |                  |       | 55–64           |                  |       |
| 1983–1987       | 0.6             | 14.6             | 104.6 | 1.0             | 38.4             | 90.3  | 0.0             | 5.8              | 85.5  | 0.4             | 17.8             | 90.2  |
| 1988–1992       | 0.2             | 9.6              | 97.3  | 1.2             | 34.9             | 98.3  | 0.0             | 4.6              | 87.7  | 0.6             | 17.6             | 98.4  |
| 1993–1997       | 1.0             | 14.6             | 129.0 | 1.0             | 36.6             | 91.0  | 0.2             | 5.5              | 105.5 | 0.0             | 12.2             | 77.0  |
| 1998–2002       | 0.2             | 15.0             | 95.0  | 0.8             | 49.8             | 78.4  | 0.4             | 8.1              | 115.5 | 1.4             | 22.4             | 118.9 |
| 2003–2007       | 0.4             | 18.0             | 103.4 | 1.2             | 51.8             | 89.7  | 0.2             | 9.4              | 103.9 | 0.8             | 17.7             | 105.6 |
| 2008–2012       | 0.4             | 22.0             | 103.7 | 1.8             | 52.2             | 107.4 | 0.0             | 8.9              | 91.9  | 0.4             | 14.6             | 97.8  |
|                 | 25–34           |                  |       | 65–74           |                  |       | 25–34           |                  |       | 65–74           |                  |       |
| 1983–1987       | 0.8             | 25.9             | 101.3 | 1.2             | 47.8             | 109.1 | 0.0             | 8.9              | 82.6  | 1.2             | 35.9             | 115.0 |
| 1988–1992       | 0.4             | 18.7             | 97.6  | 0.8             | 35.6             | 101.0 | 0.6             | 10.5             | 121.3 | 0.2             | 19.6             | 75.1  |
| 1993–1997       | 0.4             | 19.6             | 100.5 | 2.0             | 47.0             | 147.3 | 0.4             | 9.3              | 111.6 | 1.0             | 23.6             | 120.9 |
| 1998–2002       | 0.4             | 26.2             | 96.9  | 1.8             | 50.3             | 110.6 | 0.2             | 11.4             | 98.1  | 0.8             | 21.9             | 104.4 |
| 2003–2007       | 1.6             | 40.2             | 129.7 | 1.4             | 44.6             | 104.0 | 0.2             | 12.8             | 98.4  | 0.8             | 19.8             | 106.4 |
| 2008–2012       | 0.8             | 34.9             | 107.3 | 0.2             | 31.7             | 80.3  | 0.4             | 15.4             | 107.4 | 0.4             | 16.9             | 94.7  |
|                 | 35–44           |                  |       | >74 y/o         |                  |       | 35–44           |                  |       | >74 y/o         |                  |       |
| 1983–1987       | 1.6             | 35.6             | 111.9 | 1.0             | 74.7             | 95.3  | 0.4             | 11.4             | 96.7  | 1.4             | 64.3             | 111.5 |
| 1988–1992       | 1.2             | 27.5             | 116.0 | 1.8             | 86.4             | 133.9 | 0.6             | 10.7             | 110.7 | 0.6             | 36.4             | 76.0  |
| 1993–1997       | 0.8             | 26.0             | 106.2 | 0.6             | 46.0             | 88.3  | 0.0             | 7.4              | 86.5  | 0.4             | 24.1             | 70.1  |
| 1998–2002       | 0.8             | 35.2             | 100.1 | 2.0             | 73.2             | 138.9 | 0.0             | 9.1              | 88.3  | 1.2             | 34.5             | 111.0 |
| 2003–2007       | 0.6             | 37.4             | 93.3  | 1.4             | 51.2             | 113.7 | 0.0             | 11.3             | 89.7  | 0.6             | 19.5             | 87.1  |
| 2008–2012       | 1.4             | 42.7             | 114.6 | 1.4             | 45.2             | 109.0 | 0.8             | 15.9             | 117.4 | 0.8             | 19.3             | 100.1 |

Secondary Medical Zone ID: 009

|           | Male            |          |       |          |          |       | Female          |          |       |          |          |       |
|-----------|-----------------|----------|-------|----------|----------|-------|-----------------|----------|-------|----------|----------|-------|
|           | Suicide         |          |       | Suicide  |          |       | Suicide         |          |       | Suicide  |          |       |
|           | Num             | Rate     | × 100 | Num      | Rate     | × 100 | Num             | Rate     | × 100 | Num      | Rate     | × 100 |
|           | per year        | /100,000 |       | per year | /100,000 |       | per year        | /100,000 |       | per year | /100,000 |       |
|           | Total (>10 y/o) |          |       | 45–54    |          |       | Total (>10 y/o) |          |       | 45–54    |          |       |
| 1983–1987 | 42.4            | 32.5     | 100.1 | 14.6     | 64.7     | 127.9 | 14.2            | 11.7     | 63.8  | 4.4      | 19.5     | 113.2 |
| 1988–1992 | 22.4            | 22.5     | 86.7  | 7.0      | 38.3     | 111.4 | 13.4            | 11.5     | 83.9  | 3.0      | 15.1     | 103.2 |
| 1993–1997 | 25.0            | 23.8     | 93.5  | 6.6      | 37.0     | 101.2 | 12.0            | 10.1     | 88.0  | 1.6      | 10.5     | 81.4  |
| 1998–2002 | 36.6            | 35.7     | 95.8  | 6.2      | 42.5     | 75.9  | 12.2            | 11.2     | 80.0  | 1.6      | 12.1     | 80.2  |
| 2003–2007 | 35.2            | 36.9     | 95.5  | 6.2      | 48.4     | 86.6  | 12.2            | 12.0     | 85.2  | 1.6      | 12.6     | 92.2  |
| 2008–2012 | 35.6            | 36.7     | 106.2 | 4.6      | 45.0     | 92.6  | 18.4            | 15.7     | 117.3 | 3.4      | 21.0     | 140.8 |
|           | 15–24           |          |       | 55–64    |          |       | 15–24           |          |       | 55–64    |          |       |
| 1983–1987 | 2.0             | 10.6     | 76.2  | 7.8      | 48.1     | 113.1 | 1.0             | 5.9      | 86.4  | 2.0      | 15.0     | 76.1  |
| 1988–1992 | 1.0             | 8.1      | 82.1  | 4.6      | 31.4     | 88.4  | 1.2             | 6.2      | 118.4 | 3.4      | 19.5     | 109.2 |
| 1993–1997 | 1.4             | 10.2     | 89.8  | 5.8      | 37.4     | 92.9  | 0.8             | 5.4      | 104.4 | 2.6      | 15.4     | 97.1  |
| 1998–2002 | 2.0             | 15.6     | 98.9  | 8.8      | 57.4     | 90.3  | 0.6             | 6.5      | 92.8  | 2.0      | 14.8     | 78.8  |
| 2003–2007 | 2.4             | 19.2     | 110.1 | 7.2      | 47.4     | 82.1  | 0.8             | 9.1      | 100.7 | 2.4      | 14.8     | 88.1  |
| 2008–2012 | 2.8             | 23.9     | 112.7 | 8.2      | 50.2     | 103.3 | 2.0             | 15.7     | 161.9 | 3.4      | 16.8     | 112.7 |
|           | 25–34           |          |       | 65–74    |          |       | 25–34           |          |       | 65–74    |          |       |
| 1983–1987 | 4.8             | 26.9     | 105.1 | 4.4      | 41.6     | 94.9  | 1.4             | 9.2      | 85.5  | 2.4      | 22.0     | 70.4  |
| 1988–1992 | 2.4             | 19.8     | 103.8 | 1.6      | 23.4     | 66.4  | 0.4             | 6.3      | 72.3  | 2.0      | 19.3     | 73.9  |
| 1993–1997 | 1.6             | 16.8     | 86.0  | 4.4      | 37.8     | 118.6 | 0.8             | 7.6      | 91.1  | 2.6      | 19.4     | 99.8  |
| 1998–2002 | 4.2             | 31.2     | 115.5 | 5.8      | 45.4     | 99.9  | 0.4             | 8.4      | 72.1  | 3.2      | 21.5     | 102.4 |
| 2003–2007 | 5.2             | 38.7     | 124.7 | 5.0      | 38.2     | 89.1  | 0.8             | 10.5     | 81.0  | 1.6      | 13.7     | 73.5  |
| 2008–2012 | 5.6             | 43.8     | 134.6 | 5.6      | 40.3     | 102.0 | 2.6             | 19.0     | 132.8 | 1.8      | 14.1     | 79.5  |
|           | 35–44           |          |       | >74 y/o  |          |       | 35–44           |          |       | >74 y/o  |          |       |
| 1983–1987 | 7.0             | 31.0     | 97.3  | 1.6      | 35.7     | 45.6  | 1.6             | 9.0      | 75.9  | 1.4      | 16.2     | 28.0  |
| 1988–1992 | 3.8             | 22.0     | 92.9  | 1.8      | 43.0     | 66.6  | 1.6             | 9.0      | 92.9  | 1.8      | 27.2     | 56.8  |
| 1993–1997 | 2.8             | 21.3     | 86.7  | 2.4      | 43.4     | 83.3  | 2.2             | 11.3     | 133.4 | 1.4      | 18.7     | 54.4  |
| 1998–2002 | 6.2             | 47.5     | 134.8 | 3.2      | 46.4     | 88.0  | 2.0             | 12.8     | 124.0 | 2.4      | 21.6     | 69.6  |
| 2003–2007 | 6.0             | 50.4     | 125.8 | 3.0      | 36.2     | 80.5  | 2.8             | 16.9     | 134.1 | 2.2      | 16.0     | 71.5  |
| 2008–2012 | 5.6             | 41.8     | 112.5 | 3.2      | 32.4     | 78.2  | 2.4             | 15.8     | 116.6 | 2.8      | 16.6     | 86.4  |

Secondary Medical Zone ID: 010

|           | Male            |          |       |          |          |       | Female          |          |       |          |          |       |
|-----------|-----------------|----------|-------|----------|----------|-------|-----------------|----------|-------|----------|----------|-------|
|           | Suicide         |          |       | Suicide  |          |       | Suicide         |          |       | Suicide  |          |       |
|           | Num             | Rate     | × 100 | Num      | Rate     | × 100 | Num             | Rate     | × 100 | Num      | Rate     | × 100 |
|           | per year        | /100,000 |       | per year | /100,000 |       | per year        | /100,000 |       | per year | /100,000 |       |
|           | Total (>10 y/o) |          |       | 45–54    |          |       | Total (>10 y/o) |          |       | 45–54    |          |       |
| 1983–1987 | 33.4            | 34.2     | 109.4 | 7.6      | 51.6     | 102.0 | 13.2            | 14.0     | 87.7  | 2.4      | 17.0     | 98.5  |
| 1988–1992 | 24.4            | 25.9     | 108.4 | 6.0      | 38.2     | 111.2 | 11.0            | 11.8     | 88.9  | 1.8      | 13.4     | 91.9  |
| 1993–1997 | 27.2            | 26.5     | 108.8 | 6.6      | 37.6     | 102.8 | 12.2            | 10.9     | 101.5 | 2.0      | 12.2     | 94.1  |
| 1998–2002 | 46.8            | 41.0     | 121.0 | 9.2      | 51.8     | 92.6  | 14.0            | 12.3     | 95.4  | 4.0      | 18.2     | 121.1 |
| 2003–2007 | 47.2            | 41.6     | 120.3 | 11.0     | 66.7     | 119.2 | 14.0            | 12.7     | 96.3  | 3.8      | 18.4     | 134.0 |
| 2008–2012 | 44.2            | 37.9     | 119.3 | 8.0      | 56.0     | 115.3 | 13.6            | 12.7     | 95.1  | 1.8      | 14.3     | 95.6  |
|           | 15–24           |          |       | 55–64    |          |       | 15–24           |          |       | 55–64    |          |       |
| 1983–1987 | 4.2             | 21.6     | 154.8 | 4.2      | 40.5     | 95.3  | 1.2             | 7.4      | 108.1 | 2.2      | 19.8     | 100.2 |
| 1988–1992 | 2.0             | 11.7     | 117.9 | 3.8      | 32.8     | 92.4  | 1.0             | 5.9      | 111.5 | 1.8      | 16.3     | 91.5  |
| 1993–1997 | 2.6             | 14.1     | 124.8 | 5.8      | 42.8     | 106.3 | 0.6             | 4.7      | 90.5  | 2.0      | 15.3     | 96.0  |
| 1998–2002 | 3.0             | 19.1     | 120.7 | 12.4     | 80.6     | 126.8 | 1.8             | 9.6      | 136.4 | 3.4      | 20.6     | 109.6 |
| 2003–2007 | 2.4             | 19.0     | 108.9 | 11.2     | 65.6     | 113.7 | 0.8             | 8.3      | 92.7  | 2.0      | 14.3     | 85.3  |
| 2008–2012 | 2.4             | 22.2     | 104.8 | 12.6     | 63.2     | 130.2 | 1.0             | 10.2     | 104.7 | 2.4      | 14.0     | 93.7  |
|           | 25–34           |          |       | 65–74    |          |       | 25–34           |          |       | 65–74    |          |       |
| 1983–1987 | 5.6             | 30.3     | 118.7 | 2.0      | 36.5     | 83.5  | 1.4             | 9.5      | 88.0  | 2.4      | 31.8     | 101.8 |
| 1988–1992 | 3.4             | 23.3     | 121.7 | 2.2      | 34.0     | 96.5  | 1.0             | 8.0      | 92.7  | 1.8      | 23.5     | 90.1  |
| 1993–1997 | 3.6             | 23.9     | 122.6 | 1.8      | 25.2     | 79.0  | 1.0             | 7.9      | 94.9  | 1.8      | 18.5     | 95.1  |
| 1998–2002 | 5.2             | 31.9     | 118.1 | 5.2      | 48.2     | 106.0 | 0.8             | 9.0      | 77.9  | 2.2      | 19.7     | 94.0  |
| 2003–2007 | 7.2             | 42.0     | 135.5 | 5.0      | 43.4     | 101.0 | 1.6             | 12.2     | 94.0  | 2.2      | 17.7     | 95.0  |
| 2008–2012 | 3.6             | 30.1     | 92.5  | 5.8      | 43.7     | 110.7 | 1.8             | 14.5     | 101.5 | 2.4      | 17.4     | 98.0  |
|           | 35–44           |          |       | >74 y/o  |          |       | 35–44           |          |       | >74 y/o  |          |       |
| 1983–1987 | 8.2             | 40.0     | 125.7 | 1.0      | 45.5     | 58.1  | 1.4             | 9.5      | 80.7  | 2.2      | 40.6     | 70.3  |
| 1988–1992 | 4.4             | 23.8     | 100.3 | 2.6      | 71.0     | 110.1 | 1.6             | 9.1      | 94.2  | 1.8      | 38.4     | 80.3  |
| 1993–1997 | 4.0             | 24.6     | 100.4 | 2.8      | 61.4     | 117.9 | 2.6             | 12.1     | 142.1 | 2.0      | 31.4     | 91.3  |
| 1998–2002 | 7.8             | 49.2     | 139.7 | 4.0      | 65.3     | 123.9 | 0.4             | 6.9      | 66.9  | 1.4      | 19.5     | 62.9  |
| 2003–2007 | 6.0             | 43.3     | 108.0 | 4.0      | 50.9     | 113.1 | 2.2             | 14.1     | 111.5 | 1.4      | 14.5     | 64.5  |
| 2008–2012 | 6.8             | 41.8     | 112.3 | 5.0      | 49.7     | 119.9 | 1.8             | 13.1     | 96.7  | 2.4      | 17.3     | 90.2  |

Secondary Medical Zone ID: 011

|           | Male            |                  |       |                 |                  |       | Female          |                  |       |                 |                  |       |
|-----------|-----------------|------------------|-------|-----------------|------------------|-------|-----------------|------------------|-------|-----------------|------------------|-------|
|           | Suicide         |                  |       | Suicide         |                  |       | Suicide         |                  |       | Suicide         |                  |       |
|           | Num<br>per year | Rate<br>/100,000 | × 100 | Num<br>per year | Rate<br>/100,000 | × 100 | Num<br>per year | Rate<br>/100,000 | × 100 | Num<br>per year | Rate<br>/100,000 | × 100 |
|           |                 |                  |       |                 |                  |       |                 |                  |       |                 |                  |       |
|           | Total (>10 y/o) |                  |       | 45–54           |                  |       | Total (>10 y/o) |                  |       | 45–54           |                  |       |
| 1983–1987 | 19.6            | 36.2             | 126.1 | 4.4             | 55.1             | 109.0 | 8.0             | 15.1             | 101.6 | 1.6             | 19.0             | 110.1 |
| 1988–1992 | 15.0            | 28.5             | 132.9 | 2.6             | 37.2             | 108.4 | 8.2             | 13.8             | 119.2 | 1.0             | 14.8             | 101.0 |
| 1993–1997 | 13.4            | 27.3             | 118.8 | 1.8             | 33.0             | 90.1  | 7.0             | 11.8             | 117.8 | 1.4             | 15.0             | 116.4 |
| 1998–2002 | 15.6            | 36.4             | 103.0 | 3.4             | 53.6             | 95.8  | 6.6             | 12.7             | 103.8 | 1.2             | 15.9             | 105.6 |
| 2003–2007 | 17.2            | 37.8             | 114.3 | 3.4             | 57.2             | 102.3 | 8.6             | 13.9             | 125.6 | 1.0             | 14.7             | 107.3 |
| 2008–2012 | 16.4            | 36.8             | 118.7 | 3.6             | 58.7             | 120.7 | 4.8             | 12.5             | 96.6  | 0.2             | 12.6             | 84.6  |
|           | 15–24           |                  |       | 55–64           |                  |       | 15–24           |                  |       | 55–64           |                  |       |
| 1983–1987 | 0.8             | 13.8             | 99.1  | 5.2             | 65.4             | 153.9 | 0.4             | 6.7              | 97.9  | 2.0             | 24.4             | 123.7 |
| 1988–1992 | 1.0             | 11.8             | 118.9 | 3.6             | 47.1             | 132.7 | 0.6             | 6.4              | 120.7 | 2.2             | 23.4             | 131.0 |
| 1993–1997 | 1.0             | 12.9             | 113.9 | 3.2             | 46.4             | 115.1 | 0.2             | 4.9              | 94.6  | 1.2             | 17.1             | 107.8 |
| 1998–2002 | 1.2             | 17.9             | 113.3 | 3.8             | 66.4             | 104.4 | 0.2             | 6.6              | 94.1  | 2.2             | 23.6             | 125.2 |
| 2003–2007 | 1.4             | 21.3             | 121.9 | 4.2             | 65.7             | 113.8 | 0.0             | 7.3              | 81.3  | 1.8             | 19.7             | 117.8 |
| 2008–2012 | 0.8             | 22.3             | 105.3 | 4.8             | 60.7             | 125.0 | 0.4             | 10.5             | 107.8 | 1.2             | 15.9             | 106.7 |
|           | 25–34           |                  |       | 65–74           |                  |       | 25–34           |                  |       | 65–74           |                  |       |
| 1983–1987 | 2.4             | 28.9             | 112.9 | 2.6             | 58.3             | 133.2 | 0.6             | 10.1             | 94.1  | 1.2             | 29.9             | 95.8  |
| 1988–1992 | 1.4             | 21.1             | 110.3 | 1.2             | 34.7             | 98.6  | 0.8             | 10.0             | 114.9 | 2.0             | 34.5             | 132.2 |
| 1993–1997 | 2.2             | 26.8             | 137.4 | 1.8             | 36.6             | 114.8 | 0.8             | 9.8              | 117.5 | 1.6             | 24.6             | 126.0 |
| 1998–2002 | 2.0             | 30.2             | 111.8 | 2.4             | 47.5             | 104.4 | 0.2             | 10.0             | 86.4  | 0.4             | 15.9             | 75.8  |
| 2003–2007 | 1.4             | 29.4             | 94.7  | 2.2             | 44.2             | 103.1 | 1.0             | 14.8             | 114.0 | 1.8             | 23.2             | 124.4 |
| 2008–2012 | 1.4             | 32.4             | 99.3  | 1.8             | 39.7             | 100.6 | 0.2             | 12.8             | 89.3  | 0.8             | 17.1             | 96.1  |
|           | 35–44           |                  |       | >74 y/o         |                  |       | 35–44           |                  |       | >74 y/o         |                  |       |
| 1983–1987 | 2.8             | 34.4             | 108.0 | 1.4             | 70.5             | 90.0  | 1.0             | 12.2             | 103.6 | 1.2             | 42.6             | 73.8  |
| 1988–1992 | 2.2             | 26.6             | 112.4 | 3.0             | 102.2            | 158.4 | 0.2             | 8.0              | 82.7  | 1.4             | 45.6             | 95.3  |
| 1993–1997 | 2.2             | 29.1             | 118.7 | 1.2             | 51.7             | 99.3  | 1.2             | 11.5             | 134.8 | 0.6             | 22.9             | 66.5  |
| 1998–2002 | 1.6             | 32.8             | 93.1  | 1.2             | 47.5             | 90.1  | 0.4             | 9.8              | 94.6  | 1.8             | 35.0             | 112.7 |
| 2003–2007 | 1.6             | 36.7             | 91.5  | 3.0             | 64.0             | 142.2 | 1.2             | 15.2             | 120.5 | 1.8             | 27.6             | 123.2 |
| 2008–2012 | 1.8             | 37.4             | 100.5 | 2.2             | 46.7             | 112.6 | 0.4             | 12.7             | 93.5  | 1.6             | 21.8             | 113.1 |

Secondary Medical Zone ID: 012

|           | Male            |                  |       |                 |                  |       | Female          |                  |       |                 |                  |       |
|-----------|-----------------|------------------|-------|-----------------|------------------|-------|-----------------|------------------|-------|-----------------|------------------|-------|
|           | Suicide         |                  |       | Suicide         |                  |       | Suicide         |                  |       | Suicide         |                  |       |
|           | Num<br>per year | Rate<br>/100,000 | × 100 | Num<br>per year | Rate<br>/100,000 | × 100 | Num<br>per year | Rate<br>/100,000 | × 100 | Num<br>per year | Rate<br>/100,000 | × 100 |
|           |                 |                  |       |                 |                  |       |                 |                  |       |                 |                  |       |
|           | Total (>10 y/o) |                  |       | 45–54           |                  |       | Total (>10 y/o) |                  |       | 45–54           |                  |       |
| 1983–1987 | 82.4            | 38.8             | 123.3 | 23.0            | 68.1             | 134.6 | 30.4            | 13.4             | 84.1  | 6.0             | 18.2             | 105.6 |
| 1988–1992 | 47.8            | 25.8             | 105.5 | 13.4            | 43.7             | 127.1 | 30.8            | 13.5             | 108.5 | 4.0             | 13.2             | 90.5  |
| 1993–1997 | 50.6            | 26.4             | 105.1 | 11.6            | 36.6             | 100.1 | 21.8            | 9.7              | 88.3  | 4.0             | 11.8             | 91.6  |
| 1998–2002 | 87.0            | 41.7             | 120.6 | 20.2            | 62.3             | 111.4 | 28.4            | 12.0             | 93.7  | 4.8             | 14.1             | 93.5  |
| 2003–2007 | 87.8            | 44.1             | 123.1 | 20.0            | 71.8             | 128.4 | 28.0            | 12.1             | 95.0  | 3.0             | 11.3             | 82.7  |
| 2008–2012 | 67.2            | 36.8             | 104.6 | 14.6            | 59.8             | 123.1 | 30.8            | 13.5             | 103.5 | 3.8             | 14.6             | 98.0  |
|           | 15–24           |                  |       | 55–64           |                  |       | 15–24           |                  |       | 55–64           |                  |       |
| 1983–1987 | 5.8             | 14.7             | 105.7 | 13.8            | 53.7             | 126.3 | 2.8             | 7.3              | 106.5 | 4.0             | 16.6             | 83.9  |
| 1988–1992 | 2.8             | 9.7              | 97.7  | 7.8             | 31.6             | 88.9  | 2.2             | 6.4              | 120.7 | 5.2             | 18.8             | 105.1 |
| 1993–1997 | 3.0             | 11.1             | 98.0  | 11.6            | 42.6             | 105.8 | 0.4             | 3.0              | 58.2  | 3.2             | 12.4             | 78.1  |
| 1998–2002 | 3.2             | 14.3             | 90.2  | 24.0            | 83.2             | 130.9 | 1.6             | 6.7              | 95.7  | 5.0             | 16.9             | 89.6  |
| 2003–2007 | 3.6             | 18.0             | 102.9 | 22.6            | 72.3             | 125.3 | 1.4             | 7.8              | 86.3  | 7.6             | 19.9             | 118.6 |
| 2008–2012 | 3.4             | 21.3             | 100.5 | 15.6            | 50.0             | 102.9 | 2.0             | 10.9             | 112.1 | 5.6             | 15.3             | 102.8 |
|           | 25–34           |                  |       | 65–74           |                  |       | 25–34           |                  |       | 65–74           |                  |       |
| 1983–1987 | 13.2            | 37.9             | 148.5 | 5.2             | 36.9             | 84.3  | 2.2             | 7.9              | 73.3  | 3.6             | 21.9             | 70.0  |
| 1988–1992 | 5.0             | 20.0             | 104.8 | 3.6             | 26.7             | 75.9  | 2.6             | 9.1              | 105.0 | 6.2             | 31.3             | 120.1 |
| 1993–1997 | 6.4             | 24.9             | 127.6 | 4.6             | 26.2             | 82.2  | 1.8             | 7.4              | 88.7  | 5.2             | 22.5             | 115.4 |
| 1998–2002 | 8.2             | 31.1             | 115.2 | 9.4             | 42.7             | 93.9  | 2.4             | 9.9              | 85.3  | 5.6             | 21.8             | 103.6 |
| 2003–2007 | 8.8             | 35.1             | 113.1 | 8.6             | 37.0             | 86.3  | 2.2             | 10.3             | 79.3  | 4.8             | 17.6             | 94.6  |
| 2008–2012 | 7.2             | 34.3             | 105.3 | 7.2             | 31.5             | 79.9  | 2.6             | 13.0             | 90.7  | 4.6             | 16.0             | 90.2  |
|           | 35–44           |                  |       | >74 y/o         |                  |       | 35–44           |                  |       | >74 y/o         |                  |       |
| 1983–1987 | 14.2            | 36.6             | 115.1 | 7.0             | 77.6             | 99.1  | 5.8             | 13.7             | 116.0 | 6.0             | 39.0             | 67.6  |
| 1988–1992 | 9.4             | 27.4             | 115.7 | 5.6             | 67.6             | 104.7 | 4.8             | 11.8             | 122.3 | 5.8             | 46.6             | 97.4  |
| 1993–1997 | 8.6             | 29.3             | 119.7 | 4.4             | 46.5             | 89.3  | 2.6             | 8.4              | 99.0  | 4.6             | 30.6             | 88.9  |
| 1998–2002 | 12.6            | 47.8             | 135.8 | 9.2             | 69.3             | 131.4 | 3.4             | 11.6             | 112.2 | 5.6             | 28.2             | 90.8  |
| 2003–2007 | 14.8            | 59.3             | 147.9 | 9.4             | 54.4             | 120.8 | 4.2             | 14.4             | 114.2 | 4.6             | 18.2             | 80.9  |
| 2008–2012 | 10.8            | 42.1             | 113.1 | 8.4             | 40.3             | 97.2  | 5.2             | 16.7             | 123.0 | 6.6             | 20.1             | 104.3 |

Secondary Medical Zone ID: 013

|           | Male            |          |       |          |          |       | Female          |          |       |          |          |       |
|-----------|-----------------|----------|-------|----------|----------|-------|-----------------|----------|-------|----------|----------|-------|
|           | Suicide         |          |       | Suicide  |          |       | Suicide         |          |       | Suicide  |          |       |
|           | Num             | Rate     | × 100 | Num      | Rate     | × 100 | Num             | Rate     | × 100 | Num      | Rate     | × 100 |
|           | per year        | /100,000 |       | per year | /100,000 |       | per year        | /100,000 |       | per year | /100,000 |       |
|           | Total (>10 y/o) |          |       | 45–54    |          |       | Total (>10 y/o) |          |       | 45–54    |          |       |
| 1983–1987 | 14.6            | 29.7     | 86.7  | 3.8      | 46.0     | 90.9  | 10.4            | 15.5     | 102.7 | 1.8      | 18.8     | 109.2 |
| 1988–1992 | 15.0            | 28.1     | 128.6 | 2.4      | 35.6     | 103.6 | 8.6             | 13.8     | 116.5 | 0.8      | 13.7     | 93.6  |
| 1993–1997 | 13.6            | 27.0     | 121.0 | 2.4      | 37.6     | 102.7 | 7.0             | 11.5     | 114.7 | 0.8      | 12.6     | 97.9  |
| 1998–2002 | 17.0            | 38.2     | 112.6 | 4.8      | 68.1     | 121.7 | 9.8             | 14.3     | 130.3 | 1.8      | 18.4     | 122.1 |
| 2003–2007 | 20.4            | 43.4     | 138.4 | 4.2      | 71.3     | 127.5 | 7.6             | 13.7     | 117.1 | 0.6      | 13.2     | 96.7  |
| 2008–2012 | 13.0            | 36.0     | 105.5 | 2.8      | 54.4     | 112.0 | 6.6             | 13.2     | 110.7 | 0.8      | 15.7     | 105.5 |
|           | 15–24           |          |       | 55–64    |          |       | 15–24           |          |       | 55–64    |          |       |
| 1983–1987 | 1.0             | 12.1     | 86.9  | 3.0      | 42.7     | 100.4 | 0.8             | 7.3      | 106.4 | 1.4      | 19.7     | 99.6  |
| 1988–1992 | 0.6             | 10.0     | 101.1 | 3.0      | 40.3     | 113.6 | 0.2             | 4.9      | 92.0  | 0.8      | 15.9     | 88.9  |
| 1993–1997 | 0.8             | 12.4     | 109.7 | 3.0      | 43.8     | 108.8 | 0.0             | 4.2      | 81.4  | 1.2      | 16.6     | 104.7 |
| 1998–2002 | 0.2             | 13.5     | 85.6  | 2.4      | 53.0     | 83.4  | 0.4             | 7.4      | 105.8 | 2.2      | 23.1     | 122.8 |
| 2003–2007 | 1.0             | 19.7     | 112.8 | 5.2      | 75.7     | 131.1 | 0.2             | 8.4      | 93.9  | 1.0      | 16.6     | 99.0  |
| 2008–2012 | 1.0             | 23.8     | 112.3 | 3.6      | 55.2     | 113.6 | 0.4             | 10.4     | 107.3 | 1.8      | 18.3     | 122.6 |
|           | 25–34           |          |       | 65–74    |          |       | 25–34           |          |       | 65–74    |          |       |
| 1983–1987 | 2.0             | 26.8     | 104.8 | 2.4      | 49.7     | 113.6 | 0.6             | 10.1     | 93.6  | 1.8      | 31.9     | 102.1 |
| 1988–1992 | 1.8             | 24.9     | 130.4 | 1.6      | 37.0     | 105.0 | 0.6             | 9.2      | 106.6 | 3.0      | 42.1     | 161.4 |
| 1993–1997 | 1.4             | 22.8     | 116.5 | 2.4      | 40.9     | 128.3 | 0.6             | 9.2      | 110.2 | 1.8      | 25.3     | 129.8 |
| 1998–2002 | 2.2             | 33.0     | 122.2 | 3.2      | 52.4     | 115.2 | 1.0             | 13.5     | 116.8 | 0.8      | 18.2     | 86.6  |
| 2003–2007 | 1.8             | 34.3     | 110.6 | 2.6      | 46.7     | 108.7 | 1.2             | 16.1     | 124.2 | 1.6      | 21.4     | 115.2 |
| 2008–2012 | 1.0             | 31.0     | 95.3  | 1.0      | 33.3     | 84.2  | 0.0             | 12.0     | 84.0  | 1.8      | 21.4     | 120.4 |
|           | 35–44           |          |       | >74 y/o  |          |       | 35–44           |          |       | >74 y/o  |          |       |
| 1983–1987 | 1.6             | 25.4     | 79.8  | 0.8      | 47.1     | 60.1  | 1.0             | 11.9     | 100.6 | 3.0      | 58.1     | 100.7 |
| 1988–1992 | 3.2             | 34.5     | 145.4 | 2.0      | 72.3     | 112.1 | 1.0             | 10.8     | 111.7 | 2.2      | 55.0     | 115.0 |
| 1993–1997 | 1.0             | 21.9     | 89.5  | 2.6      | 74.5     | 143.0 | 0.8             | 9.9      | 116.5 | 1.8      | 39.1     | 113.5 |
| 1998–2002 | 2.4             | 41.8     | 118.8 | 1.8      | 53.7     | 101.9 | 0.6             | 10.9     | 105.2 | 3.0      | 47.6     | 153.3 |
| 2003–2007 | 3.0             | 54.2     | 135.4 | 2.6      | 55.2     | 122.5 | 1.2             | 15.6     | 123.5 | 1.8      | 26.4     | 117.5 |
| 2008–2012 | 2.2             | 41.4     | 111.2 | 1.4      | 35.6     | 85.7  | 0.2             | 12.1     | 89.4  | 1.6      | 21.0     | 109.1 |

Secondary Medical Zone ID: 014

|           | Male            |          |       |          |          |       | Female          |          |       |          |          |       |
|-----------|-----------------|----------|-------|----------|----------|-------|-----------------|----------|-------|----------|----------|-------|
|           | Suicide         |          |       | Suicide  |          |       | Suicide         |          |       | Suicide  |          |       |
|           | Num             | Rate     | × 100 | Num      | Rate     | × 100 | Num             | Rate     | × 100 | Num      | Rate     | × 100 |
|           | per year        | /100,000 |       | per year | /100,000 |       | per year        | /100,000 |       | per year | /100,000 |       |
|           | Total (>10 y/o) |          |       | 45–54    |          |       | Total (>10 y/o) |          |       | 45–54    |          |       |
| 1983–1987 | 9.8             | 32.2     | 96.5  | 2.2      | 46.2     | 91.4  | 4.4             | 14.1     | 86.4  | 0.6      | 16.1     | 93.4  |
| 1988–1992 | 5.8             | 24.2     | 96.2  | 1.4      | 35.5     | 103.5 | 4.4             | 13.3     | 110.4 | 0.8      | 15.6     | 106.6 |
| 1993–1997 | 7.8             | 27.1     | 117.7 | 2.6      | 47.0     | 128.5 | 6.0             | 12.6     | 143.6 | 1.4      | 16.9     | 130.8 |
| 1998–2002 | 10.8            | 38.2     | 115.9 | 2.2      | 58.1     | 103.9 | 5.4             | 13.6     | 121.0 | 0.6      | 15.3     | 101.8 |
| 2003–2007 | 10.0            | 39.1     | 112.2 | 2.4      | 63.8     | 114.1 | 3.2             | 12.5     | 99.0  | 0.4      | 13.6     | 99.0  |
| 2008–2012 | 8.6             | 35.6     | 107.1 | 1.4      | 48.3     | 99.5  | 3.0             | 12.8     | 98.5  | 0.0      | 12.7     | 84.9  |
|           | 15–24           |          |       | 55–64    |          |       | 15–24           |          |       | 55–64    |          |       |
| 1983–1987 | 1.2             | 17.3     | 124.3 | 1.8      | 43.9     | 103.3 | 1.0             | 9.8      | 143.0 | 0.8      | 20.0     | 101.2 |
| 1988–1992 | 0.2             | 9.3      | 94.0  | 1.0      | 32.3     | 91.0  | 0.0             | 4.6      | 87.3  | 0.8      | 18.8     | 105.3 |
| 1993–1997 | 0.2             | 10.7     | 94.6  | 0.4      | 30.9     | 76.8  | 0.0             | 4.6      | 88.6  | 1.2      | 19.9     | 124.9 |
| 1998–2002 | 0.6             | 16.8     | 106.6 | 1.6      | 59.1     | 93.0  | 0.0             | 6.3      | 89.6  | 1.4      | 22.4     | 119.2 |
| 2003–2007 | 1.0             | 20.9     | 119.9 | 0.8      | 45.7     | 79.2  | 0.2             | 9.1      | 100.7 | 1.0      | 18.5     | 110.6 |
| 2008–2012 | 0.2             | 19.9     | 93.9  | 1.8      | 49.8     | 102.5 | 0.2             | 9.8      | 101.3 | 0.6      | 15.3     | 102.3 |
|           | 25–34           |          |       | 65–74    |          |       | 25–34           |          |       | 65–74    |          |       |
| 1983–1987 | 1.0             | 24.0     | 93.8  | 1.8      | 54.8     | 125.3 | 0.2             | 9.5      | 88.4  | 0.8      | 29.0     | 92.8  |
| 1988–1992 | 0.6             | 18.3     | 95.9  | 0.4      | 30.4     | 86.3  | 0.4             | 9.2      | 105.7 | 1.2      | 32.5     | 124.8 |
| 1993–1997 | 0.4             | 17.8     | 91.0  | 0.8      | 32.1     | 100.5 | 0.6             | 9.8      | 117.7 | 1.0      | 24.0     | 123.1 |
| 1998–2002 | 1.6             | 31.8     | 117.6 | 1.2      | 44.3     | 97.5  | 0.8             | 13.5     | 116.1 | 0.6      | 20.5     | 97.8  |
| 2003–2007 | 1.2             | 33.0     | 106.3 | 1.2      | 42.4     | 98.8  | 0.0             | 11.1     | 85.6  | 0.4      | 17.3     | 92.7  |
| 2008–2012 | 1.2             | 35.0     | 107.5 | 1.6      | 44.9     | 113.7 | 0.0             | 12.6     | 88.2  | 1.2      | 21.2     | 119.1 |
|           | 35–44           |          |       | >74 y/o  |          |       | 35–44           |          |       | >74 y/o  |          |       |
| 1983–1987 | 1.4             | 30.5     | 95.9  | 0.4      | 50.8     | 64.9  | 0.2             | 10.3     | 87.2  | 0.8      | 35.6     | 61.6  |
| 1988–1992 | 1.4             | 27.2     | 114.8 | 0.8      | 64.3     | 99.6  | 0.0             | 8.2      | 84.8  | 1.2      | 56.3     | 117.6 |
| 1993–1997 | 2.2             | 37.1     | 151.5 | 1.2      | 65.5     | 125.7 | 0.2             | 8.1      | 95.2  | 1.6      | 54.3     | 157.8 |
| 1998–2002 | 2.0             | 44.2     | 125.5 | 1.6      | 67.1     | 127.3 | 0.4             | 10.7     | 103.9 | 1.6      | 44.6     | 143.7 |
| 2003–2007 | 2.4             | 54.7     | 136.4 | 1.0      | 45.7     | 101.4 | 0.6             | 13.7     | 108.4 | 0.6      | 20.7     | 92.2  |
| 2008–2012 | 2.0             | 43.4     | 116.5 | 0.4      | 32.4     | 78.1  | 0.6             | 14.4     | 106.3 | 0.4      | 16.1     | 83.7  |

Secondary Medical Zone ID: 015

|           | Male            |          |       |          |          |       | Female          |          |       |          |          |       |
|-----------|-----------------|----------|-------|----------|----------|-------|-----------------|----------|-------|----------|----------|-------|
|           | Suicide         |          |       | Suicide  |          |       | Suicide         |          |       | Suicide  |          |       |
|           | Num             | Rate     | × 100 | Num      | Rate     | × 100 | Num             | Rate     | × 100 | Num      | Rate     | × 100 |
|           | per year        | /100,000 |       | per year | /100,000 |       | per year        | /100,000 |       | per year | /100,000 |       |
|           | Total (>10 y/o) |          |       | 45–54    |          |       | Total (>10 y/o) |          |       | 45–54    |          |       |
| 1983–1987 | 13.0            | 30.6     | 87.4  | 2.4      | 39.4     | 77.9  | 5.8             | 13.2     | 74.4  | 1.0      | 16.2     | 94.2  |
| 1988–1992 | 10.2            | 25.8     | 112.2 | 1.8      | 33.8     | 98.5  | 5.6             | 12.8     | 100.7 | 1.0      | 15.2     | 104.0 |
| 1993–1997 | 9.2             | 25.5     | 108.0 | 1.8      | 36.3     | 99.1  | 6.8             | 12.0     | 129.5 | 0.8      | 13.3     | 102.8 |
| 1998–2002 | 12.6            | 36.7     | 107.8 | 3.0      | 58.5     | 104.5 | 5.4             | 12.7     | 105.3 | 0.2      | 12.8     | 84.7  |
| 2003–2007 | 11.8            | 37.5     | 107.9 | 2.6      | 59.2     | 105.9 | 4.0             | 12.4     | 96.8  | 0.8      | 14.7     | 107.6 |
| 2008–2012 | 8.6             | 33.8     | 97.3  | 1.4      | 46.1     | 94.9  | 3.0             | 12.6     | 92.1  | 1.0      | 17.7     | 118.4 |
|           | 15–24           |          |       | 55–64    |          |       | 15–24           |          |       | 55–64    |          |       |
| 1983–1987 | 0.2             | 8.2      | 58.6  | 2.2      | 39.9     | 94.0  | 0.0             | 5.2      | 75.6  | 0.4      | 15.0     | 76.1  |
| 1988–1992 | 0.6             | 10.5     | 106.1 | 2.0      | 36.3     | 102.2 | 0.2             | 5.2      | 98.1  | 0.8      | 17.0     | 95.3  |
| 1993–1997 | 0.2             | 10.5     | 92.6  | 1.6      | 37.2     | 92.3  | 0.0             | 4.5      | 86.3  | 1.2      | 18.0     | 113.4 |
| 1998–2002 | 1.2             | 19.7     | 124.9 | 3.0      | 65.8     | 103.5 | 0.0             | 6.2      | 88.6  | 1.2      | 19.9     | 105.9 |
| 2003–2007 | 0.4             | 17.3     | 99.1  | 2.6      | 58.8     | 101.8 | 0.0             | 7.8      | 87.3  | 1.0      | 17.4     | 103.9 |
| 2008–2012 | 0.2             | 20.0     | 94.3  | 2.2      | 49.4     | 101.6 | 0.0             | 8.7      | 89.4  | 0.4      | 13.7     | 92.1  |
|           | 25–34           |          |       | 65–74    |          |       | 25–34           |          |       | 65–74    |          |       |
| 1983–1987 | 1.4             | 24.3     | 95.2  | 2.6      | 55.7     | 127.3 | 0.6             | 10.6     | 98.1  | 1.6      | 31.0     | 99.2  |
| 1988–1992 | 1.2             | 22.3     | 116.7 | 1.0      | 33.9     | 96.3  | 0.6             | 9.7      | 112.2 | 1.6      | 31.2     | 119.5 |
| 1993–1997 | 1.2             | 22.9     | 117.5 | 2.0      | 41.6     | 130.5 | 0.4             | 8.8      | 105.2 | 1.8      | 27.6     | 141.4 |
| 1998–2002 | 0.4             | 23.2     | 86.0  | 2.0      | 47.1     | 103.6 | 0.6             | 12.5     | 107.5 | 1.0      | 21.4     | 101.8 |
| 2003–2007 | 2.0             | 38.7     | 124.8 | 1.2      | 38.2     | 89.0  | 0.2             | 12.0     | 92.6  | 0.6      | 17.1     | 91.7  |
| 2008–2012 | 0.6             | 30.9     | 94.9  | 0.8      | 34.6     | 87.6  | 0.2             | 13.6     | 95.2  | 0.2      | 14.8     | 82.9  |
|           | 35–44           |          |       | >74 y/o  |          |       | 35–44           |          |       | >74 y/o  |          |       |
| 1983–1987 | 3.0             | 37.2     | 116.9 | 1.2      | 54.7     | 69.8  | 0.8             | 11.6     | 98.4  | 1.4      | 32.7     | 56.6  |
| 1988–1992 | 1.6             | 26.0     | 109.6 | 2.0      | 82.1     | 127.3 | 0.6             | 9.8      | 101.5 | 0.8      | 34.8     | 72.7  |
| 1993–1997 | 0.8             | 22.1     | 90.3  | 1.6      | 65.1     | 125.1 | 0.4             | 8.6      | 100.9 | 2.2      | 53.9     | 156.7 |
| 1998–2002 | 1.6             | 37.8     | 107.2 | 1.4      | 56.1     | 106.5 | 0.4             | 10.5     | 101.2 | 2.0      | 41.8     | 134.6 |
| 2003–2007 | 1.0             | 35.8     | 89.3  | 2.0      | 55.0     | 122.2 | 0.4             | 12.6     | 99.7  | 1.0      | 21.7     | 96.7  |
| 2008–2012 | 1.8             | 41.2     | 110.8 | 1.6      | 43.3     | 104.3 | 0.4             | 13.5     | 99.7  | 0.8      | 17.4     | 90.3  |



Secondary Medical Zone ID: 016

|                 | Male            |                  |       |                 |                  |       | Female          |                  |       |                 |                  |       |
|-----------------|-----------------|------------------|-------|-----------------|------------------|-------|-----------------|------------------|-------|-----------------|------------------|-------|
|                 | Suicide         |                  |       | Suicide         |                  |       | Suicide         |                  |       | Suicide         |                  |       |
|                 | Num<br>per year | Rate<br>/100,000 | × 100 | Num<br>per year | Rate<br>/100,000 | × 100 | Num<br>per year | Rate<br>/100,000 | × 100 | Num<br>per year | Rate<br>/100,000 | × 100 |
|                 |                 |                  |       |                 |                  |       |                 |                  |       |                 |                  |       |
| Total (>10 y/o) | 45–54           | Total (>10 y/o)  | 45–54 |                 |                  |       |                 |                  |       |                 |                  |       |
| 1983–1987       | 21.0            | 37.7             | 128.0 | 5.0             | 57.3             | 113.3 | 6.6             | 14.2             | 87.1  | 1.0             | 15.7             | 91.4  |
| 1988–1992       | 10.6            | 24.6             | 99.4  | 3.2             | 40.2             | 117.1 | 6.4             | 12.8             | 100.9 | 0.8             | 13.7             | 93.8  |
| 1993–1997       | 10.6            | 24.9             | 99.3  | 2.0             | 33.3             | 91.1  | 7.0             | 11.6             | 118.6 | 1.0             | 13.2             | 102.4 |
| 1998–2002       | 17.4            | 37.6             | 111.6 | 4.8             | 62.6             | 111.9 | 7.0             | 13.1             | 108.9 | 1.0             | 15.0             | 99.4  |
| 2003–2007       | 22.2            | 44.4             | 142.7 | 5.2             | 73.2             | 130.9 | 5.4             | 12.3             | 99.6  | 1.0             | 14.6             | 106.3 |
| 2008–2012       | 13.6            | 35.5             | 105.0 | 3.2             | 54.7             | 112.5 | 4.4             | 12.6             | 94.6  | 0.6             | 14.4             | 96.8  |
|                 | 15–24           |                  |       | 55–64           |                  |       | 15–24           |                  |       | 55–64           |                  |       |
| 1983–1987       | 1.2             | 15.0             | 107.2 | 3.6             | 50.7             | 119.4 | 0.2             | 5.6              | 82.5  | 0.8             | 17.2             | 87.4  |
| 1988–1992       | 0.4             | 9.3              | 94.3  | 2.0             | 33.4             | 94.1  | 0.6             | 6.4              | 120.8 | 1.0             | 17.2             | 96.6  |
| 1993–1997       | 0.8             | 12.3             | 108.5 | 2.2             | 38.0             | 94.5  | 0.2             | 5.0              | 96.6  | 1.0             | 16.0             | 100.4 |
| 1998–2002       | 0.2             | 13.4             | 85.1  | 3.6             | 63.4             | 99.8  | 0.6             | 8.3              | 117.9 | 2.0             | 22.5             | 119.8 |
| 2003–2007       | 1.6             | 22.9             | 131.4 | 5.8             | 79.4             | 137.6 | 0.0             | 7.4              | 82.5  | 1.6             | 18.9             | 112.9 |
| 2008–2012       | 0.8             | 22.7             | 107.0 | 1.6             | 39.6             | 81.6  | 0.4             | 10.7             | 109.9 | 1.0             | 15.1             | 101.5 |
|                 | 25–34           |                  |       | 65–74           |                  |       | 25–34           |                  |       | 65–74           |                  |       |
| 1983–1987       | 2.8             | 30.1             | 117.8 | 2.4             | 56.2             | 128.4 | 1.0             | 11.5             | 106.8 | 1.4             | 32.0             | 102.3 |
| 1988–1992       | 1.0             | 17.8             | 93.0  | 1.0             | 32.3             | 91.8  | 0.6             | 9.0              | 103.3 | 1.0             | 24.3             | 93.2  |
| 1993–1997       | 1.4             | 21.7             | 111.2 | 1.4             | 32.7             | 102.5 | 1.2             | 11.3             | 136.4 | 1.6             | 24.7             | 126.5 |
| 1998–2002       | 1.6             | 28.0             | 103.5 | 4.4             | 65.9             | 144.9 | 0.6             | 11.7             | 101.4 | 1.6             | 24.5             | 116.6 |
| 2003–2007       | 1.8             | 32.6             | 105.2 | 2.4             | 46.9             | 109.3 | 0.4             | 12.2             | 93.9  | 1.0             | 18.8             | 100.8 |
| 2008–2012       | 2.2             | 37.8             | 116.2 | 2.8             | 48.3             | 122.3 | 0.4             | 13.8             | 96.0  | 0.8             | 17.2             | 96.6  |
|                 | 35–44           |                  |       | >74 y/o         |                  |       | 35–44           |                  |       | >74 y/o         |                  |       |
| 1983–1987       | 3.6             | 38.1             | 119.8 | 2.4             | 97.2             | 124.1 | 0.8             | 11.1             | 94.0  | 1.4             | 46.9             | 81.4  |
| 1988–1992       | 2.2             | 26.1             | 110.1 | 0.8             | 54.2             | 83.9  | 0.4             | 8.5              | 87.9  | 2.0             | 60.4             | 126.3 |
| 1993–1997       | 1.8             | 25.9             | 105.5 | 1.0             | 49.7             | 95.4  | 0.2             | 7.0              | 82.9  | 1.8             | 45.0             | 130.7 |
| 1998–2002       | 2.2             | 37.5             | 106.4 | 0.6             | 39.1             | 74.2  | 0.4             | 9.7              | 93.7  | 0.8             | 23.6             | 76.0  |
| 2003–2007       | 3.4             | 54.4             | 135.7 | 2.0             | 52.9             | 117.5 | 0.2             | 10.9             | 86.6  | 1.2             | 22.5             | 100.5 |
| 2008–2012       | 2.0             | 38.0             | 102.2 | 1.0             | 34.9             | 84.1  | 0.4             | 12.8             | 94.4  | 0.8             | 16.4             | 85.4  |

## Secondary Medical Zone ID: 017

|                 | Male            |                  |       |                 |                  |       | Female          |                  |       |                 |                  |       |
|-----------------|-----------------|------------------|-------|-----------------|------------------|-------|-----------------|------------------|-------|-----------------|------------------|-------|
|                 | Suicide         |                  |       | Suicide         |                  |       | Suicide         |                  |       | Suicide         |                  |       |
|                 | Num<br>per year | Rate<br>/100,000 | × 100 | Num<br>per year | Rate<br>/100,000 | × 100 | Num<br>per year | Rate<br>/100,000 | × 100 | Num<br>per year | Rate<br>/100,000 | × 100 |
|                 |                 |                  |       |                 |                  |       |                 |                  |       |                 |                  |       |
| Total (>10 y/o) | 45–54           | Total (>10 y/o)  | 45–54 |                 |                  |       |                 |                  |       |                 |                  |       |
| 1983–1987       | 48.8            | 35.0             | 108.5 | 13.6            | 60.1             | 118.8 | 18.8            | 13.1             | 79.9  | 2.0             | 12.8             | 74.2  |
| 1988–1992       | 31.8            | 26.5             | 111.4 | 7.0             | 38.0             | 110.6 | 19.8            | 13.8             | 114.0 | 4.0             | 17.9             | 122.2 |
| 1993–1997       | 29.6            | 25.2             | 100.7 | 5.8             | 32.9             | 89.8  | 18.4            | 12.3             | 119.9 | 1.8             | 10.9             | 84.6  |
| 1998–2002       | 47.2            | 38.0             | 108.1 | 9.2             | 49.9             | 89.1  | 18.6            | 12.8             | 104.1 | 2.2             | 13.0             | 86.0  |
| 2003–2007       | 52.4            | 42.5             | 120.0 | 12.6            | 70.7             | 126.4 | 19.2            | 13.3             | 110.3 | 2.6             | 14.3             | 104.6 |
| 2008–2012       | 43.6            | 37.3             | 109.8 | 10.0            | 60.6             | 124.7 | 20.2            | 14.1             | 116.0 | 4.4             | 21.9             | 146.8 |
|                 | 15–24           |                  |       | 55–64           |                  |       | 15–24           |                  |       | 55–64           |                  |       |
| 1983–1987       | 3.0             | 11.9             | 85.6  | 5.0             | 33.9             | 79.7  | 1.4             | 6.5              | 94.9  | 2.8             | 17.8             | 90.4  |
| 1988–1992       | 2.2             | 10.8             | 109.5 | 4.6             | 30.5             | 85.9  | 1.2             | 6.1              | 115.0 | 4.2             | 22.0             | 123.4 |
| 1993–1997       | 1.8             | 10.6             | 93.6  | 5.2             | 34.6             | 86.0  | 1.8             | 7.9              | 151.0 | 4.0             | 20.2             | 127.1 |
| 1998–2002       | 1.8             | 13.4             | 84.6  | 8.8             | 57.5             | 90.5  | 0.6             | 6.0              | 85.3  | 4.4             | 21.9             | 116.4 |
| 2003–2007       | 2.8             | 19.0             | 109.1 | 11.8            | 65.7             | 113.8 | 1.0             | 9.0              | 99.7  | 4.6             | 20.3             | 121.2 |
| 2008–2012       | 2.2             | 20.2             | 95.4  | 8.8             | 48.3             | 99.4  | 1.0             | 10.2             | 104.9 | 1.4             | 11.1             | 74.4  |
|                 | 25–34           |                  |       | 65–74           |                  |       | 25–34           |                  |       | 65–74           |                  |       |
| 1983–1987       | 7.0             | 30.2             | 118.0 | 5.6             | 52.9             | 120.7 | 1.2             | 7.9              | 73.0  | 4.2             | 32.4             | 103.5 |
| 1988–1992       | 3.2             | 19.4             | 101.6 | 4.4             | 43.5             | 123.3 | 1.8             | 9.6              | 110.9 | 3.4             | 28.0             | 107.4 |
| 1993–1997       | 5.0             | 27.7             | 141.9 | 4.2             | 35.5             | 111.4 | 1.2             | 8.1              | 97.3  | 3.4             | 23.4             | 120.1 |
| 1998–2002       | 5.4             | 31.5             | 116.6 | 7.2             | 51.1             | 112.3 | 2.2             | 12.8             | 110.7 | 3.4             | 22.0             | 104.9 |
| 2003–2007       | 5.8             | 35.5             | 114.5 | 4.8             | 36.9             | 86.1  | 2.2             | 14.1             | 108.2 | 3.4             | 20.1             | 108.2 |
| 2008–2012       | 5.2             | 36.9             | 113.4 | 4.4             | 35.0             | 88.6  | 2.0             | 15.3             | 106.8 | 3.6             | 19.9             | 112.0 |
|                 | 35–44           |                  |       | >74 y/o         |                  |       | 35–44           |                  |       | >74 y/o         |                  |       |
| 1983–1987       | 8.8             | 35.7             | 112.1 | 5.8             | 84.6             | 108.0 | 2.0             | 9.9              | 84.1  | 5.2             | 44.9             | 77.9  |
| 1988–1992       | 6.2             | 28.2             | 119.0 | 3.8             | 72.0             | 111.7 | 2.2             | 9.9              | 102.8 | 3.0             | 41.0             | 85.7  |
| 1993–1997       | 3.8             | 22.3             | 91.0  | 3.8             | 61.7             | 118.6 | 2.6             | 11.4             | 134.2 | 3.6             | 38.2             | 110.9 |
| 1998–2002       | 8.8             | 49.4             | 140.2 | 5.8             | 70.9             | 134.5 | 1.4             | 9.6              | 92.5  | 4.4             | 35.2             | 113.4 |
| 2003–2007       | 9.0             | 55.4             | 138.2 | 5.4             | 52.5             | 116.7 | 1.8             | 12.4             | 98.0  | 3.6             | 23.0             | 102.6 |
| 2008–2012       | 7.0             | 42.5             | 114.1 | 5.8             | 45.6             | 109.9 | 1.8             | 13.1             | 96.3  | 6.0             | 28.4             | 147.7 |

Secondary Medical Zone ID: 018

|           | Male            |          |       |          |          |       | Female          |          |       |          |          |       |
|-----------|-----------------|----------|-------|----------|----------|-------|-----------------|----------|-------|----------|----------|-------|
|           | Suicide         |          |       | Suicide  |          |       | Suicide         |          |       | Suicide  |          |       |
|           | Num             | Rate     | × 100 | Num      | Rate     | × 100 | Num             | Rate     | × 100 | Num      | Rate     | × 100 |
|           | per year        | /100,000 |       | per year | /100,000 |       | per year        | /100,000 |       | per year | /100,000 |       |
|           | Total (>10 y/o) |          |       | 45–54    |          |       | Total (>10 y/o) |          |       | 45–54    |          |       |
| 1983–1987 | 20.4            | 36.2     | 118.1 | 6.0      | 62.6     | 123.7 | 10.2            | 15.7     | 107.3 | 1.6      | 18.0     | 104.3 |
| 1988–1992 | 12.0            | 25.1     | 106.3 | 2.8      | 37.9     | 110.5 | 9.0             | 13.9     | 119.5 | 1.2      | 15.0     | 102.8 |
| 1993–1997 | 17.0            | 29.4     | 138.9 | 4.0      | 46.8     | 127.9 | 7.0             | 11.2     | 112.2 | 0.4      | 10.9     | 84.5  |
| 1998–2002 | 20.4            | 39.1     | 123.8 | 4.6      | 63.6     | 113.7 | 7.4             | 12.7     | 106.3 | 0.2      | 11.9     | 79.2  |
| 2003–2007 | 22.6            | 43.9     | 143.2 | 6.2      | 87.2     | 155.8 | 7.0             | 13.1     | 108.5 | 0.8      | 13.8     | 100.6 |
| 2008–2012 | 15.8            | 36.3     | 115.9 | 2.4      | 49.1     | 101.0 | 8.4             | 14.1     | 121.5 | 1.0      | 16.3     | 109.3 |
|           | 15–24           |          |       | 55–64    |          |       | 15–24           |          |       | 55–64    |          |       |
| 1983–1987 | 1.4             | 15.6     | 111.8 | 3.8      | 49.8     | 117.3 | 0.4             | 6.6      | 96.1  | 1.8      | 21.8     | 110.5 |
| 1988–1992 | 1.0             | 11.4     | 114.9 | 3.6      | 44.4     | 125.0 | 0.2             | 4.9      | 93.4  | 1.6      | 19.5     | 109.0 |
| 1993–1997 | 0.2             | 9.6      | 85.0  | 5.2      | 58.9     | 146.3 | 0.2             | 5.0      | 96.0  | 1.4      | 17.4     | 109.3 |
| 1998–2002 | 1.2             | 18.3     | 115.9 | 4.0      | 65.5     | 103.1 | 0.0             | 5.9      | 84.4  | 0.8      | 16.8     | 89.3  |
| 2003–2007 | 0.8             | 18.7     | 107.1 | 4.8      | 70.1     | 121.5 | 0.4             | 9.7      | 107.9 | 2.0      | 20.0     | 119.6 |
| 2008–2012 | 0.4             | 20.2     | 95.2  | 4.2      | 57.2     | 117.8 | 0.2             | 9.5      | 98.1  | 2.2      | 19.3     | 129.6 |
|           | 25–34           |          |       | 65–74    |          |       | 25–34           |          |       | 65–74    |          |       |
| 1983–1987 | 1.2             | 21.4     | 83.7  | 2.0      | 45.9     | 104.8 | 1.0             | 11.9     | 110.8 | 1.6      | 31.1     | 99.4  |
| 1988–1992 | 0.6             | 15.8     | 82.6  | 1.8      | 38.7     | 109.8 | 1.2             | 11.6     | 134.3 | 2.6      | 37.7     | 144.5 |
| 1993–1997 | 1.2             | 21.1     | 107.8 | 2.4      | 40.0     | 125.5 | 0.0             | 6.6      | 79.9  | 2.0      | 26.1     | 134.1 |
| 1998–2002 | 1.0             | 25.1     | 93.1  | 2.6      | 46.3     | 101.8 | 0.6             | 11.8     | 101.9 | 2.6      | 29.3     | 139.7 |
| 2003–2007 | 1.2             | 29.6     | 95.5  | 3.6      | 54.1     | 126.2 | 0.4             | 12.3     | 94.4  | 1.0      | 17.6     | 94.6  |
| 2008–2012 | 1.8             | 36.2     | 111.0 | 2.4      | 43.0     | 108.8 | 1.0             | 16.8     | 117.0 | 1.4      | 19.2     | 107.8 |
|           | 35–44           |          |       | >74 y/o  |          |       | 35–44           |          |       | >74 y/o  |          |       |
| 1983–1987 | 4.0             | 41.5     | 130.4 | 2.0      | 78.0     | 99.6  | 1.2             | 12.6     | 107.0 | 2.4      | 56.5     | 98.0  |
| 1988–1992 | 0.8             | 18.4     | 77.5  | 1.4      | 61.9     | 96.0  | 0.6             | 9.3      | 96.3  | 1.6      | 46.4     | 96.9  |
| 1993–1997 | 1.8             | 27.2     | 110.8 | 2.2      | 67.9     | 130.4 | 0.4             | 8.0      | 94.1  | 2.6      | 51.6     | 150.0 |
| 1998–2002 | 2.2             | 38.2     | 108.6 | 4.8      | 100.3    | 190.2 | 0.4             | 9.7      | 94.0  | 2.8      | 44.3     | 142.6 |
| 2003–2007 | 2.6             | 47.0     | 117.3 | 3.4      | 65.1     | 144.6 | 0.8             | 13.6     | 107.4 | 1.6      | 23.7     | 105.6 |
| 2008–2012 | 1.8             | 38.0     | 102.1 | 2.8      | 49.7     | 119.8 | 0.4             | 12.8     | 94.5  | 2.0      | 23.1     | 120.0 |

Secondary Medical Zone ID: 019

|           | Male            |                  |       |                 |                  |       | Female          |                  |       |                 |                  |       |
|-----------|-----------------|------------------|-------|-----------------|------------------|-------|-----------------|------------------|-------|-----------------|------------------|-------|
|           | Suicide         |                  |       | Suicide         |                  |       | Suicide         |                  |       | Suicide         |                  |       |
|           | Num<br>per year | Rate<br>/100,000 | × 100 | Num<br>per year | Rate<br>/100,000 | × 100 | Num<br>per year | Rate<br>/100,000 | × 100 | Num<br>per year | Rate<br>/100,000 | × 100 |
|           |                 |                  |       |                 |                  |       |                 |                  |       |                 |                  |       |
|           | Total (>10 y/o) |                  |       | 45–54           |                  |       | Total (>10 y/o) |                  |       | 45–54           |                  |       |
| 1983–1987 | 58.8            | 34.3             | 106.5 | 17.4            | 60.9             | 120.4 | 26.2            | 14.3             | 91.6  | 2.6             | 12.5             | 72.4  |
| 1988–1992 | 43.0            | 26.4             | 110.5 | 10.8            | 42.3             | 123.3 | 27.6            | 14.1             | 117.7 | 5.0             | 17.3             | 118.5 |
| 1993–1997 | 42.2            | 25.3             | 103.1 | 9.0             | 35.5             | 97.0  | 33.4            | 14.4             | 152.8 | 5.4             | 16.8             | 129.8 |
| 1998–2002 | 68.8            | 39.3             | 112.2 | 15.8            | 58.1             | 103.8 | 27.4            | 12.9             | 108.1 | 4.0             | 14.5             | 96.2  |
| 2003–2007 | 68.6            | 40.2             | 110.8 | 17.2            | 67.9             | 121.3 | 30.6            | 13.6             | 120.4 | 4.8             | 16.8             | 122.3 |
| 2008–2012 | 59.6            | 36.4             | 104.2 | 11.0            | 48.8             | 100.5 | 29.0            | 14.1             | 114.8 | 4.6             | 18.0             | 120.5 |
|           | 15–24           |                  |       | 55–64           |                  |       | 15–24           |                  |       | 55–64           |                  |       |
| 1983–1987 | 6.0             | 18.7             | 134.2 | 7.8             | 39.6             | 93.1  | 1.8             | 6.7              | 98.7  | 4.4             | 20.8             | 105.6 |
| 1988–1992 | 2.2             | 9.8              | 98.8  | 8.6             | 38.2             | 107.5 | 1.0             | 4.7              | 89.1  | 5.8             | 23.1             | 129.2 |
| 1993–1997 | 2.4             | 11.3             | 99.8  | 7.0             | 33.1             | 82.1  | 0.8             | 4.4              | 83.8  | 8.6             | 29.3             | 184.2 |
| 1998–2002 | 4.0             | 18.7             | 118.1 | 13.6            | 61.1             | 96.2  | 1.6             | 7.6              | 107.8 | 4.4             | 18.1             | 96.2  |
| 2003–2007 | 3.0             | 17.8             | 102.3 | 18.0            | 70.8             | 122.7 | 1.4             | 8.7              | 96.5  | 6.4             | 20.7             | 123.4 |
| 2008–2012 | 4.2             | 25.1             | 118.5 | 12.2            | 47.2             | 97.1  | 2.0             | 11.7             | 120.4 | 5.2             | 16.9             | 113.2 |
|           | 25–34           |                  |       | 65–74           |                  |       | 25–34           |                  |       | 65–74           |                  |       |
| 1983–1987 | 5.6             | 21.0             | 82.0  | 4.8             | 41.2             | 94.1  | 3.0             | 10.8             | 100.5 | 4.6             | 31.4             | 100.6 |
| 1988–1992 | 4.8             | 20.2             | 105.6 | 5.0             | 38.9             | 110.4 | 2.2             | 8.9              | 102.7 | 4.4             | 28.5             | 109.2 |
| 1993–1997 | 4.8             | 20.9             | 107.3 | 6.2             | 37.8             | 118.5 | 0.8             | 5.7              | 68.0  | 6.6             | 32.3             | 165.9 |
| 1998–2002 | 9.0             | 35.3             | 130.7 | 7.2             | 40.0             | 88.0  | 2.8             | 11.7             | 100.8 | 4.6             | 22.1             | 105.1 |
| 2003–2007 | 7.4             | 32.6             | 105.3 | 5.6             | 31.4             | 73.2  | 2.0             | 10.7             | 82.0  | 6.4             | 25.1             | 134.7 |
| 2008–2012 | 6.2             | 32.2             | 99.0  | 7.0             | 36.7             | 93.0  | 2.8             | 14.5             | 100.9 | 5.4             | 20.9             | 117.2 |
|           | 35–44           |                  |       | >74 y/o         |                  |       | 35–44           |                  |       | >74 y/o         |                  |       |
| 1983–1987 | 11.0            | 35.9             | 112.8 | 6.0             | 77.5             | 98.9  | 3.6             | 11.7             | 99.1  | 6.2             | 50.6             | 87.6  |
| 1988–1992 | 5.6             | 20.8             | 87.8  | 6.0             | 79.4             | 123.0 | 3.0             | 9.9              | 103.0 | 6.2             | 57.7             | 120.7 |
| 1993–1997 | 5.2             | 21.4             | 87.2  | 7.4             | 81.0             | 155.6 | 3.2             | 10.8             | 126.7 | 8.0             | 58.4             | 169.6 |
| 1998–2002 | 10.4            | 42.5             | 120.8 | 8.6             | 76.0             | 144.1 | 2.2             | 9.7              | 93.7  | 7.8             | 45.0             | 145.0 |
| 2003–2007 | 11.0            | 47.4             | 118.2 | 6.4             | 45.8             | 101.8 | 2.2             | 10.8             | 85.7  | 7.2             | 32.1             | 143.2 |
| 2008–2012 | 12.0            | 47.1             | 126.5 | 7.0             | 40.0             | 96.5  | 2.4             | 11.7             | 86.5  | 6.4             | 23.5             | 122.3 |

Secondary Medical Zone ID: 020

|           | Male            |                  |       |                 |                  |       | Female          |                  |       |                 |                  |       |
|-----------|-----------------|------------------|-------|-----------------|------------------|-------|-----------------|------------------|-------|-----------------|------------------|-------|
|           | Suicide         |                  |       | Suicide         |                  |       | Suicide         |                  |       | Suicide         |                  |       |
|           | Num<br>per year | Rate<br>/100,000 | × 100 | Num<br>per year | Rate<br>/100,000 | × 100 | Num<br>per year | Rate<br>/100,000 | × 100 | Num<br>per year | Rate<br>/100,000 | × 100 |
|           |                 |                  |       |                 |                  |       |                 |                  |       |                 |                  |       |
|           | Total (>10 y/o) |                  |       | 45–54           |                  |       | Total (>10 y/o) |                  |       | 45–54           |                  |       |
| 1983–1987 | 42.8            | 31.2             | 94.0  | 13.6            | 55.3             | 109.4 | 23.2            | 15.1             | 98.4  | 3.4             | 16.0             | 92.6  |
| 1988–1992 | 37.4            | 27.8             | 118.8 | 8.6             | 39.4             | 114.7 | 18.6            | 12.7             | 101.9 | 4.2             | 17.0             | 116.6 |
| 1993–1997 | 34.2            | 25.8             | 105.3 | 8.4             | 38.0             | 103.8 | 19.0            | 11.7             | 114.5 | 4.4             | 16.2             | 125.5 |
| 1998–2002 | 53.0            | 39.3             | 111.4 | 17.0            | 72.1             | 128.7 | 17.8            | 12.0             | 93.8  | 2.0             | 11.5             | 76.4  |
| 2003–2007 | 57.0            | 42.0             | 122.9 | 13.0            | 66.1             | 118.2 | 21.6            | 13.5             | 113.5 | 2.6             | 13.3             | 97.4  |
| 2008–2012 | 49.2            | 39.7             | 118.5 | 10.8            | 62.6             | 128.8 | 20.6            | 13.9             | 111.6 | 3.8             | 19.0             | 127.4 |
|           | 15–24           |                  |       | 55–64           |                  |       | 15–24           |                  |       | 55–64           |                  |       |
| 1983–1987 | 3.8             | 14.3             | 102.8 | 6.2             | 39.7             | 93.5  | 1.0             | 5.4              | 79.7  | 3.2             | 19.4             | 98.4  |
| 1988–1992 | 2.6             | 11.3             | 114.4 | 7.6             | 41.6             | 117.2 | 0.4             | 3.6              | 68.5  | 4.6             | 22.6             | 126.6 |
| 1993–1997 | 0.8             | 7.9              | 69.5  | 8.0             | 43.0             | 106.9 | 0.6             | 4.2              | 81.1  | 4.2             | 19.6             | 123.3 |
| 1998–2002 | 1.8             | 13.5             | 85.3  | 12.4            | 67.5             | 106.2 | 0.4             | 5.1              | 72.2  | 2.8             | 16.1             | 85.8  |
| 2003–2007 | 2.8             | 19.2             | 109.8 | 16.2            | 78.7             | 136.3 | 0.8             | 7.6              | 84.7  | 3.6             | 16.7             | 99.9  |
| 2008–2012 | 2.6             | 22.2             | 104.6 | 11.2            | 53.6             | 110.4 | 0.6             | 7.9              | 81.8  | 3.4             | 15.1             | 101.1 |
|           | 25–34           |                  |       | 65–74           |                  |       | 25–34           |                  |       | 65–74           |                  |       |
| 1983–1987 | 4.6             | 20.1             | 78.6  | 4.0             | 44.7             | 102.1 | 4.2             | 14.7             | 136.4 | 3.4             | 30.4             | 97.3  |
| 1988–1992 | 4.0             | 20.4             | 106.9 | 2.4             | 29.8             | 84.6  | 1.4             | 7.8              | 89.6  | 2.8             | 24.7             | 94.6  |
| 1993–1997 | 3.0             | 18.2             | 92.9  | 3.4             | 30.6             | 95.8  | 1.2             | 7.4              | 89.3  | 3.8             | 25.1             | 128.5 |
| 1998–2002 | 5.2             | 28.9             | 107.1 | 4.4             | 36.1             | 79.5  | 2.0             | 11.4             | 98.2  | 3.8             | 23.0             | 109.4 |
| 2003–2007 | 6.6             | 38.0             | 122.6 | 7.0             | 45.5             | 106.2 | 3.0             | 15.7             | 121.1 | 4.2             | 22.0             | 118.0 |
| 2008–2012 | 5.6             | 38.4             | 118.0 | 5.2             | 36.6             | 92.7  | 2.4             | 16.1             | 112.4 | 4.0             | 20.1             | 113.1 |
|           | 35–44           |                  |       | >74 y/o         |                  |       | 35–44           |                  |       | >74 y/o         |                  |       |
| 1983–1987 | 9.0             | 32.9             | 103.3 | 1.2             | 37.2             | 47.4  | 2.6             | 10.5             | 88.7  | 5.2             | 56.4             | 97.8  |
| 1988–1992 | 7.6             | 29.3             | 123.6 | 4.2             | 81.8             | 126.9 | 2.2             | 9.1              | 93.9  | 2.8             | 40.6             | 84.8  |
| 1993–1997 | 5.6             | 26.2             | 107.0 | 4.8             | 77.9             | 149.6 | 1.6             | 7.9              | 92.4  | 3.2             | 35.8             | 104.2 |
| 1998–2002 | 9.0             | 47.0             | 133.5 | 3.2             | 48.6             | 92.2  | 2.6             | 12.3             | 119.4 | 4.2             | 35.0             | 112.6 |
| 2003–2007 | 6.8             | 42.7             | 106.4 | 4.6             | 48.9             | 108.6 | 2.4             | 13.4             | 106.4 | 4.8             | 30.1             | 134.1 |
| 2008–2012 | 8.8             | 48.4             | 130.1 | 5.0             | 42.4             | 102.1 | 2.6             | 14.7             | 108.2 | 3.8             | 20.3             | 105.6 |

Secondary Medical Zone ID: 021

|           | Male            |          |       |          |          |       | Female          |          |       |          |          |       |
|-----------|-----------------|----------|-------|----------|----------|-------|-----------------|----------|-------|----------|----------|-------|
|           | Suicide         |          |       | Suicide  |          |       | Suicide         |          |       | Suicide  |          |       |
|           | Num             | Rate     | × 100 | Num      | Rate     | × 100 | Num             | Rate     | × 100 | Num      | Rate     | × 100 |
|           | per year        | /100,000 |       | per year | /100,000 |       | per year        | /100,000 |       | per year | /100,000 |       |
|           | Total (>10 y/o) |          |       | 45–54    |          |       | Total (>10 y/o) |          |       | 45–54    |          |       |
| 1983–1987 | 13.6            | 32.6     | 103.3 | 3.6      | 51.0     | 100.9 | 6.6             | 15.3     | 101.8 | 1.0      | 16.6     | 96.4  |
| 1988–1992 | 11.2            | 25.6     | 112.1 | 1.8      | 31.5     | 91.7  | 6.6             | 13.6     | 112.2 | 1.2      | 15.5     | 106.3 |
| 1993–1997 | 10.0            | 24.9     | 99.7  | 1.6      | 31.5     | 86.0  | 5.8             | 11.3     | 110.9 | 0.0      | 9.5      | 73.9  |
| 1998–2002 | 17.8            | 38.2     | 115.9 | 3.4      | 52.6     | 94.0  | 6.2             | 12.7     | 103.7 | 1.0      | 14.9     | 99.2  |
| 2003–2007 | 18.0            | 40.3     | 118.2 | 6.0      | 80.2     | 143.5 | 6.8             | 13.2     | 110.8 | 1.4      | 15.9     | 116.3 |
| 2008–2012 | 20.8            | 40.4     | 137.3 | 3.6      | 56.0     | 115.3 | 7.0             | 13.6     | 112.2 | 0.6      | 14.0     | 93.8  |
|           | 15–24           |          |       | 55–64    |          |       | 15–24           |          |       | 55–64    |          |       |
| 1983–1987 | 1.4             | 16.9     | 121.3 | 3.0      | 51.7     | 121.8 | 0.6             | 7.3      | 106.7 | 1.8      | 24.9     | 126.3 |
| 1988–1992 | 0.8             | 10.8     | 109.6 | 2.2      | 37.9     | 106.8 | 0.2             | 4.9      | 92.6  | 1.0      | 18.2     | 101.9 |
| 1993–1997 | 1.0             | 12.9     | 114.4 | 2.4      | 41.7     | 103.7 | 0.2             | 4.9      | 94.7  | 1.8      | 20.9     | 131.3 |
| 1998–2002 | 0.4             | 14.2     | 89.7  | 4.2      | 71.1     | 111.9 | 0.6             | 8.1      | 115.3 | 0.2      | 14.8     | 78.5  |
| 2003–2007 | 0.4             | 15.9     | 91.3  | 3.6      | 60.3     | 104.5 | 0.2             | 8.2      | 91.5  | 1.0      | 16.6     | 98.9  |
| 2008–2012 | 2.0             | 29.1     | 137.1 | 5.6      | 65.2     | 134.3 | 0.6             | 11.5     | 118.1 | 1.0      | 15.0     | 100.7 |
|           | 25–34           |          |       | 65–74    |          |       | 25–34           |          |       | 65–74    |          |       |
| 1983–1987 | 2.0             | 25.8     | 100.8 | 1.2      | 45.2     | 103.3 | 1.0             | 11.6     | 107.7 | 0.4      | 24.6     | 78.7  |
| 1988–1992 | 1.6             | 21.5     | 112.4 | 1.0      | 35.7     | 101.3 | 0.6             | 8.8      | 102.0 | 1.8      | 35.9     | 137.5 |
| 1993–1997 | 2.4             | 27.0     | 138.3 | 0.8      | 28.3     | 88.6  | 0.2             | 7.2      | 86.6  | 0.8      | 19.5     | 100.3 |
| 1998–2002 | 1.6             | 27.2     | 100.6 | 3.8      | 63.0     | 138.4 | 0.4             | 10.6     | 91.8  | 1.4      | 24.2     | 115.3 |
| 2003–2007 | 3.0             | 39.4     | 127.1 | 1.4      | 38.3     | 89.3  | 1.2             | 15.3     | 117.9 | 0.8      | 17.7     | 95.3  |
| 2008–2012 | 3.0             | 41.0     | 125.8 | 1.6      | 38.8     | 98.3  | 0.8             | 15.1     | 105.4 | 1.4      | 19.9     | 111.9 |
|           | 35–44           |          |       | >74 y/o  |          |       | 35–44           |          |       | >74 y/o  |          |       |
| 1983–1987 | 1.4             | 25.2     | 79.2  | 1.0      | 76.0     | 97.1  | 0.6             | 10.7     | 90.5  | 1.2      | 59.1     | 102.4 |
| 1988–1992 | 1.0             | 18.9     | 79.9  | 2.6      | 108.5    | 168.2 | 0.4             | 8.6      | 88.6  | 1.4      | 56.5     | 118.1 |
| 1993–1997 | 1.0             | 19.9     | 81.2  | 0.8      | 50.3     | 96.6  | 0.6             | 8.6      | 101.4 | 2.2      | 58.4     | 169.7 |
| 1998–2002 | 3.0             | 42.5     | 120.5 | 1.4      | 58.6     | 111.1 | 0.4             | 9.4      | 91.1  | 2.2      | 47.1     | 151.7 |
| 2003–2007 | 1.8             | 36.0     | 89.7  | 1.6      | 50.4     | 112.0 | 0.8             | 13.1     | 103.7 | 1.4      | 27.1     | 121.0 |
| 2008–2012 | 2.8             | 41.5     | 111.5 | 2.2      | 50.3     | 121.2 | 0.8             | 13.9     | 102.6 | 1.8      | 25.6     | 133.1 |

Secondary Medical Zone ID: 022

|           | Male            |                  |       |                 |                  |       | Female          |                  |       |                 |                  |       |
|-----------|-----------------|------------------|-------|-----------------|------------------|-------|-----------------|------------------|-------|-----------------|------------------|-------|
|           | Suicide         |                  |       | Suicide         |                  |       | Suicide         |                  |       | Suicide         |                  |       |
|           | Num<br>per year | Rate<br>/100,000 | × 100 | Num<br>per year | Rate<br>/100,000 | × 100 | Num<br>per year | Rate<br>/100,000 | × 100 | Num<br>per year | Rate<br>/100,000 | × 100 |
|           |                 |                  |       |                 |                  |       |                 |                  |       |                 |                  |       |
|           | Total (>10 y/o) |                  |       | 45–54           |                  |       | Total (>10 y/o) |                  |       | 45–54           |                  |       |
| 1983–1987 | 54.2            | 38.7             | 124.6 | 13.2            | 58.9             | 116.4 | 23.2            | 14.5             | 94.0  | 4.6             | 17.9             | 104.0 |
| 1988–1992 | 42.4            | 29.1             | 122.7 | 9.4             | 43.6             | 127.1 | 22.8            | 12.6             | 98.3  | 4.4             | 16.8             | 114.8 |
| 1993–1997 | 49.0            | 30.9             | 132.8 | 11.6            | 48.2             | 131.8 | 19.4            | 10.5             | 94.4  | 3.4             | 13.3             | 103.3 |
| 1998–2002 | 80.2            | 48.3             | 147.6 | 21.0            | 83.1             | 148.5 | 24.4            | 12.7             | 99.9  | 5.4             | 18.5             | 123.0 |
| 2003–2007 | 88.4            | 54.4             | 163.7 | 23.6            | 103.5            | 185.1 | 21.0            | 11.3             | 92.6  | 3.6             | 14.6             | 106.7 |
| 2008–2012 | 61.8            | 40.0             | 126.2 | 11.0            | 56.1             | 115.5 | 18.8            | 11.5             | 88.2  | 1.8             | 11.3             | 75.8  |
|           | 15–24           |                  |       | 55–64           |                  |       | 15–24           |                  |       | 55–64           |                  |       |
| 1983–1987 | 5.6             | 22.1             | 158.4 | 9.0             | 49.1             | 115.4 | 2.4             | 8.7              | 127.1 | 3.8             | 18.7             | 94.6  |
| 1988–1992 | 3.0             | 12.1             | 122.1 | 7.6             | 36.9             | 103.9 | 1.8             | 6.6              | 124.5 | 4.8             | 19.3             | 108.2 |
| 1993–1997 | 1.8             | 9.9              | 87.5  | 14.0            | 61.8             | 153.6 | 1.6             | 6.1              | 117.1 | 3.8             | 15.7             | 99.0  |
| 1998–2002 | 3.4             | 16.5             | 104.4 | 23.4            | 109.6            | 172.4 | 0.8             | 5.5              | 77.7  | 5.4             | 21.3             | 113.4 |
| 2003–2007 | 2.8             | 16.6             | 95.1  | 20.8            | 91.0             | 157.7 | 0.2             | 4.7              | 51.9  | 4.8             | 18.4             | 109.8 |
| 2008–2012 | 2.0             | 16.8             | 79.0  | 16.4            | 66.0             | 135.8 | 1.4             | 9.4              | 96.6  | 3.2             | 13.7             | 91.7  |
|           | 25–34           |                  |       | 65–74           |                  |       | 25–34           |                  |       | 65–74           |                  |       |
| 1983–1987 | 6.6             | 29.2             | 114.3 | 4.8             | 46.4             | 106.0 | 1.4             | 7.8              | 72.7  | 4.6             | 32.3             | 103.3 |
| 1988–1992 | 7.0             | 31.5             | 164.7 | 3.2             | 29.5             | 83.7  | 1.4             | 7.6              | 87.5  | 3.0             | 19.9             | 76.4  |
| 1993–1997 | 5.2             | 25.6             | 131.2 | 5.0             | 32.8             | 102.8 | 2.2             | 9.8              | 117.4 | 4.0             | 19.9             | 102.2 |
| 1998–2002 | 7.6             | 36.7             | 135.8 | 11.4            | 59.1             | 130.0 | 2.8             | 13.1             | 113.2 | 3.2             | 16.1             | 76.7  |
| 2003–2007 | 8.2             | 41.8             | 134.7 | 11.6            | 59.4             | 138.4 | 1.6             | 10.9             | 83.8  | 4.4             | 18.9             | 101.3 |
| 2008–2012 | 7.2             | 40.4             | 124.0 | 10.4            | 54.9             | 139.0 | 1.4             | 11.7             | 81.9  | 3.2             | 15.9             | 89.6  |
|           | 35–44           |                  |       | >74 y/o         |                  |       | 35–44           |                  |       | >74 y/o         |                  |       |
| 1983–1987 | 11.4            | 44.9             | 141.1 | 3.4             | 70.7             | 90.3  | 3.2             | 12.3             | 103.9 | 3.2             | 40.8             | 70.8  |
| 1988–1992 | 7.2             | 28.5             | 120.2 | 4.8             | 71.1             | 110.2 | 2.8             | 10.3             | 106.7 | 4.6             | 40.4             | 84.4  |
| 1993–1997 | 6.8             | 29.6             | 120.7 | 4.6             | 59.6             | 114.4 | 1.4             | 7.0              | 82.4  | 3.0             | 22.6             | 65.8  |
| 1998–2002 | 9.6             | 45.3             | 128.7 | 3.6             | 43.1             | 81.7  | 1.8             | 9.2              | 89.1  | 5.0             | 28.4             | 91.4  |
| 2003–2007 | 14.8            | 72.5             | 180.9 | 6.4             | 51.6             | 114.5 | 1.0             | 8.7              | 68.7  | 5.2             | 23.0             | 102.5 |
| 2008–2012 | 8.2             | 43.2             | 116.1 | 6.4             | 43.1             | 103.8 | 2.0             | 12.2             | 89.7  | 5.8             | 21.0             | 109.0 |

Secondary Medical Zone ID: 023

|                 | Male            |                  |       |                 |                  |       | Female          |                  |       |                 |                  |       |
|-----------------|-----------------|------------------|-------|-----------------|------------------|-------|-----------------|------------------|-------|-----------------|------------------|-------|
|                 | Suicide         |                  |       | Suicide         |                  |       | Suicide         |                  |       | Suicide         |                  |       |
|                 | Num<br>per year | Rate<br>/100,000 | × 100 | Num<br>per year | Rate<br>/100,000 | × 100 | Num<br>per year | Rate<br>/100,000 | × 100 | Num<br>per year | Rate<br>/100,000 | × 100 |
|                 |                 |                  |       |                 |                  |       |                 |                  |       |                 |                  |       |
| Total (>10 y/o) | 45–54           | Total (>10 y/o)  | 45–54 |                 |                  |       |                 |                  |       |                 |                  |       |
| 1983–1987       | 64.8            | 43.5             | 145.1 | 17.4            | 72.2             | 142.8 | 31.4            | 18.3             | 128.7 | 4.2             | 16.9             | 98.1  |
| 1988–1992       | 51.4            | 32.0             | 140.9 | 13.8            | 54.4             | 158.5 | 29.8            | 15.4             | 129.8 | 5.8             | 19.4             | 132.8 |
| 1993–1997       | 53.4            | 31.2             | 133.7 | 11.8            | 43.5             | 118.9 | 24.4            | 11.7             | 117.4 | 3.2             | 12.3             | 94.9  |
| 1998–2002       | 77.8            | 43.8             | 129.5 | 16.8            | 59.9             | 107.0 | 35.4            | 14.8             | 136.5 | 6.4             | 19.5             | 129.8 |
| 2003–2007       | 91.0            | 50.0             | 149.5 | 21.4            | 81.4             | 145.5 | 30.2            | 13.8             | 121.7 | 3.8             | 14.3             | 104.6 |
| 2008–2012       | 74.8            | 41.9             | 133.8 | 16.2            | 68.1             | 140.1 | 27.8            | 13.1             | 114.2 | 1.8             | 10.8             | 72.4  |
|                 | 15–24           |                  |       | 55–64           |                  |       | 15–24           |                  |       | 55–64           |                  |       |
| 1983–1987       | 3.8             | 15.6             | 111.6 | 11.2            | 61.6             | 144.9 | 2.2             | 8.2              | 120.2 | 6.4             | 28.1             | 142.3 |
| 1988–1992       | 3.0             | 11.0             | 111.6 | 8.0             | 39.3             | 110.8 | 1.0             | 4.8              | 91.7  | 5.0             | 20.5             | 115.1 |
| 1993–1997       | 3.8             | 13.6             | 120.1 | 9.6             | 44.5             | 110.5 | 0.2             | 3.1              | 59.3  | 3.8             | 15.9             | 99.7  |
| 1998–2002       | 3.4             | 15.6             | 99.0  | 20.0            | 86.4             | 136.0 | 1.0             | 6.2              | 88.2  | 5.0             | 19.8             | 105.3 |
| 2003–2007       | 3.8             | 19.1             | 109.6 | 20.8            | 80.1             | 138.7 | 2.0             | 10.6             | 118.0 | 3.6             | 14.9             | 89.3  |
| 2008–2012       | 3.8             | 22.9             | 107.9 | 16.4            | 58.4             | 120.2 | 1.6             | 10.5             | 107.9 | 4.2             | 15.0             | 100.4 |
|                 | 25–34           |                  |       | 65–74           |                  |       | 25–34           |                  |       | 65–74           |                  |       |
| 1983–1987       | 8.8             | 32.6             | 127.4 | 5.2             | 54.4             | 124.3 | 2.8             | 10.7             | 99.4  | 6.0             | 44.5             | 142.4 |
| 1988–1992       | 6.0             | 25.0             | 131.1 | 4.8             | 41.5             | 117.9 | 2.0             | 8.7              | 100.2 | 7.8             | 45.1             | 172.8 |
| 1993–1997       | 5.0             | 22.1             | 113.1 | 6.0             | 39.8             | 124.7 | 2.4             | 9.7              | 116.5 | 5.8             | 28.3             | 145.2 |
| 1998–2002       | 8.6             | 34.9             | 129.2 | 10.0            | 54.6             | 120.0 | 1.6             | 9.3              | 80.7  | 9.0             | 35.8             | 170.4 |
| 2003–2007       | 8.6             | 38.4             | 123.9 | 13.4            | 64.8             | 151.1 | 2.4             | 12.4             | 95.2  | 6.4             | 24.9             | 133.7 |
| 2008–2012       | 7.0             | 37.1             | 114.0 | 10.8            | 51.6             | 130.7 | 1.8             | 12.4             | 86.8  | 4.8             | 19.7             | 110.8 |
|                 | 35–44           |                  |       | >74 y/o         |                  |       | 35–44           |                  |       | >74 y/o         |                  |       |
| 1983–1987       | 13.6            | 46.3             | 145.6 | 4.6             | 105.2            | 134.3 | 3.2             | 11.6             | 97.9  | 6.4             | 88.9             | 154.2 |
| 1988–1992       | 11.4            | 36.5             | 154.1 | 4.2             | 73.9             | 114.6 | 2.4             | 8.9              | 92.2  | 5.6             | 57.6             | 120.3 |
| 1993–1997       | 9.6             | 34.4             | 140.3 | 7.6             | 99.3             | 190.7 | 1.6             | 7.1              | 83.2  | 7.2             | 54.8             | 159.2 |
| 1998–2002       | 13.2            | 52.2             | 148.1 | 5.6             | 63.3             | 120.0 | 2.0             | 9.3              | 89.8  | 10.4            | 59.4             | 191.3 |
| 2003–2007       | 14.6            | 61.5             | 153.4 | 7.8             | 62.7             | 139.2 | 2.8             | 12.5             | 99.3  | 9.2             | 40.8             | 181.7 |
| 2008–2012       | 10.2            | 43.4             | 116.6 | 10.2            | 62.5             | 150.5 | 3.4             | 14.5             | 107.1 | 10.2            | 35.4             | 184.2 |



Secondary Medical Zone ID: 024

|                 | Male            |                  |       |                 |                  |       | Female          |                  |       |                 |                  |       |
|-----------------|-----------------|------------------|-------|-----------------|------------------|-------|-----------------|------------------|-------|-----------------|------------------|-------|
|                 | Suicide         |                  |       | Suicide         |                  |       | Suicide         |                  |       | Suicide         |                  |       |
|                 | Num<br>per year | Rate<br>/100,000 | × 100 | Num<br>per year | Rate<br>/100,000 | × 100 | Num<br>per year | Rate<br>/100,000 | × 100 | Num<br>per year | Rate<br>/100,000 | × 100 |
|                 |                 |                  |       |                 |                  |       |                 |                  |       |                 |                  |       |
| Total (>10 y/o) | 45–54           | Total (>10 y/o)  | 45–54 |                 |                  |       |                 |                  |       |                 |                  |       |
| 1983–1987       | 58.2            | 39.8             | 131.2 | 17.0            | 71.7             | 141.8 | 26.2            | 15.7             | 106.6 | 5.4             | 19.7             | 114.6 |
| 1988–1992       | 43.8            | 29.0             | 124.9 | 11.6            | 48.2             | 140.4 | 21.8            | 12.4             | 97.0  | 4.4             | 16.2             | 111.0 |
| 1993–1997       | 45.6            | 28.4             | 118.6 | 12.0            | 44.7             | 122.1 | 16.6            | 9.5              | 83.6  | 1.6             | 8.7              | 67.4  |
| 1998–2002       | 70.0            | 41.4             | 120.1 | 18.6            | 67.3             | 120.2 | 21.4            | 11.8             | 88.3  | 2.4             | 11.1             | 73.8  |
| 2003–2007       | 86.4            | 49.4             | 147.1 | 22.0            | 87.0             | 155.6 | 21.0            | 11.6             | 89.9  | 4.0             | 14.8             | 107.9 |
| 2008–2012       | 64.2            | 40.2             | 122.0 | 15.8            | 68.1             | 140.1 | 26.2            | 13.9             | 108.7 | 4.0             | 16.4             | 110.1 |
|                 | 15–24           |                  |       | 55–64           |                  |       | 15–24           |                  |       | 55–64           |                  |       |
| 1983–1987       | 4.4             | 18.4             | 132.0 | 10.2            | 56.5             | 133.0 | 1.2             | 5.8              | 85.1  | 6.8             | 28.8             | 146.0 |
| 1988–1992       | 1.4             | 8.2              | 82.3  | 8.8             | 43.3             | 121.8 | 1.4             | 5.6              | 106.4 | 4.6             | 19.1             | 107.2 |
| 1993–1997       | 3.2             | 12.7             | 112.7 | 11.0            | 50.6             | 125.8 | 0.8             | 4.3              | 82.1  | 3.8             | 15.7             | 99.0  |
| 1998–2002       | 3.2             | 15.3             | 96.6  | 18.8            | 83.9             | 132.1 | 1.0             | 5.9              | 83.9  | 4.4             | 18.3             | 97.2  |
| 2003–2007       | 3.0             | 17.2             | 98.3  | 23.4            | 91.3             | 158.2 | 1.4             | 8.3              | 92.8  | 4.4             | 16.6             | 99.0  |
| 2008–2012       | 2.2             | 18.4             | 86.6  | 16.6            | 62.0             | 127.7 | 2.0             | 11.7             | 120.7 | 4.2             | 15.0             | 100.8 |
|                 | 25–34           |                  |       | 65–74           |                  |       | 25–34           |                  |       | 65–74           |                  |       |
| 1983–1987       | 7.8             | 29.8             | 116.5 | 3.8             | 42.3             | 96.6  | 3.6             | 12.4             | 115.0 | 2.2             | 22.2             | 71.0  |
| 1988–1992       | 5.8             | 25.0             | 130.9 | 4.2             | 37.4             | 106.2 | 1.0             | 6.2              | 71.0  | 4.0             | 26.3             | 100.8 |
| 1993–1997       | 5.8             | 25.4             | 129.9 | 5.0             | 34.6             | 108.4 | 1.8             | 8.2              | 98.2  | 4.0             | 20.9             | 107.2 |
| 1998–2002       | 6.8             | 30.1             | 111.5 | 7.2             | 43.4             | 95.4  | 3.2             | 13.0             | 112.1 | 4.2             | 19.8             | 94.2  |
| 2003–2007       | 8.0             | 36.4             | 117.5 | 9.6             | 51.5             | 120.0 | 2.2             | 11.5             | 88.7  | 4.0             | 17.9             | 96.2  |
| 2008–2012       | 7.6             | 39.4             | 121.0 | 7.6             | 41.8             | 105.8 | 2.0             | 12.8             | 89.1  | 5.4             | 21.5             | 120.6 |
|                 | 35–44           |                  |       | >74 y/o         |                  |       | 35–44           |                  |       | >74 y/o         |                  |       |
| 1983–1987       | 11.4            | 39.9             | 125.2 | 3.4             | 81.4             | 103.9 | 3.4             | 11.7             | 99.1  | 3.6             | 51.7             | 89.6  |
| 1988–1992       | 9.8             | 33.5             | 141.4 | 2.2             | 46.3             | 71.7  | 3.0             | 10.0             | 103.4 | 3.4             | 36.9             | 77.1  |
| 1993–1997       | 6.2             | 25.2             | 102.9 | 2.4             | 39.9             | 76.7  | 1.8             | 7.5              | 88.1  | 2.8             | 24.5             | 71.2  |
| 1998–2002       | 11.0            | 45.8             | 130.0 | 4.4             | 52.3             | 99.2  | 2.8             | 11.1             | 107.5 | 3.4             | 23.0             | 74.0  |
| 2003–2007       | 13.6            | 59.4             | 148.2 | 6.6             | 55.8             | 123.8 | 1.4             | 9.1              | 72.0  | 3.6             | 18.3             | 81.8  |
| 2008–2012       | 10.2            | 44.6             | 119.8 | 4.2             | 33.6             | 80.9  | 3.6             | 15.0             | 110.6 | 4.8             | 18.8             | 97.8  |

Secondary Medical Zone ID: 025

|           | Male            |          |       |          |          |       | Female          |          |       |          |          |       |
|-----------|-----------------|----------|-------|----------|----------|-------|-----------------|----------|-------|----------|----------|-------|
|           | Suicide         |          |       | Suicide  |          |       | Suicide         |          |       | Suicide  |          |       |
|           | Num             | Rate     | × 100 | Num      | Rate     | × 100 | Num             | Rate     | × 100 | Num      | Rate     | × 100 |
|           | per year        | /100,000 |       | per year | /100,000 |       | per year        | /100,000 |       | per year | /100,000 |       |
|           | Total (>10 y/o) |          |       | 45–54    |          |       | Total (>10 y/o) |          |       | 45–54    |          |       |
| 1983–1987 | 30.8            | 37.7     | 127.5 | 9.4      | 69.8     | 138.1 | 15.2            | 16.4     | 109.8 | 1.8      | 15.2     | 88.3  |
| 1988–1992 | 22.2            | 27.7     | 118.8 | 4.0      | 36.6     | 106.7 | 10.2            | 12.0     | 86.7  | 2.4      | 16.5     | 113.1 |
| 1993–1997 | 29.8            | 31.7     | 148.1 | 4.6      | 39.9     | 108.9 | 11.2            | 11.0     | 102.8 | 2.0      | 14.4     | 111.3 |
| 1998–2002 | 38.6            | 43.2     | 136.0 | 8.2      | 65.3     | 116.8 | 15.0            | 13.7     | 114.4 | 1.8      | 14.9     | 99.2  |
| 2003–2007 | 48.2            | 54.0     | 171.4 | 12.8     | 102.2    | 182.7 | 13.8            | 12.7     | 112.9 | 1.6      | 13.8     | 100.6 |
| 2008–2012 | 31.6            | 38.8     | 127.9 | 7.2      | 65.3     | 134.3 | 10.6            | 12.3     | 98.8  | 1.0      | 13.0     | 87.3  |
|           | 15–24           |          |       | 55–64    |          |       | 15–24           |          |       | 55–64    |          |       |
| 1983–1987 | 2.6             | 19.6     | 140.6 | 6.2      | 55.6     | 130.8 | 1.8             | 10.2     | 148.7 | 2.4      | 20.5     | 104.1 |
| 1988–1992 | 1.2             | 10.9     | 109.9 | 4.2      | 36.9     | 104.0 | 0.6             | 5.6      | 105.4 | 1.2      | 13.7     | 76.9  |
| 1993–1997 | 1.4             | 12.6     | 111.8 | 5.4      | 45.8     | 113.7 | 0.4             | 5.0      | 96.1  | 1.2      | 12.5     | 78.3  |
| 1998–2002 | 1.0             | 14.4     | 90.9  | 10.6     | 92.0     | 144.7 | 2.0             | 11.8     | 168.5 | 2.2      | 18.6     | 98.7  |
| 2003–2007 | 1.0             | 16.2     | 92.9  | 9.6      | 81.0     | 140.4 | 0.2             | 7.0      | 78.0  | 3.0      | 20.0     | 119.6 |
| 2008–2012 | 1.0             | 19.9     | 94.1  | 7.2      | 57.6     | 118.6 | 0.2             | 7.9      | 81.6  | 1.4      | 13.8     | 92.3  |
|           | 25–34           |          |       | 65–74    |          |       | 25–34           |          |       | 65–74    |          |       |
| 1983–1987 | 2.0             | 20.8     | 81.2  | 3.6      | 54.1     | 123.5 | 1.2             | 10.2     | 94.8  | 2.2      | 29.3     | 93.7  |
| 1988–1992 | 3.0             | 25.6     | 134.1 | 3.0      | 40.2     | 114.2 | 0.8             | 8.2      | 94.9  | 2.6      | 27.9     | 106.9 |
| 1993–1997 | 3.6             | 29.7     | 152.0 | 6.2      | 57.6     | 180.6 | 1.2             | 9.8      | 117.6 | 2.0      | 19.0     | 97.3  |
| 1998–2002 | 3.4             | 33.0     | 122.2 | 7.8      | 65.4     | 143.9 | 1.2             | 12.3     | 106.4 | 3.4      | 24.7     | 117.3 |
| 2003–2007 | 4.6             | 43.6     | 140.7 | 7.2      | 61.4     | 143.0 | 1.0             | 12.9     | 99.4  | 3.0      | 21.3     | 114.4 |
| 2008–2012 | 1.4             | 28.2     | 86.7  | 4.2      | 44.1     | 111.6 | 0.8             | 13.7     | 95.9  | 1.4      | 15.5     | 86.9  |
|           | 35–44           |          |       | >74 y/o  |          |       | 35–44           |          |       | >74 y/o  |          |       |
| 1983–1987 | 4.6             | 36.7     | 115.1 | 2.2      | 73.5     | 93.8  | 1.6             | 12.1     | 102.6 | 4.2      | 79.6     | 138.0 |
| 1988–1992 | 4.8             | 33.0     | 139.3 | 2.0      | 55.6     | 86.2  | 1.0             | 9.0      | 93.0  | 1.6      | 29.1     | 60.8  |
| 1993–1997 | 3.8             | 30.3     | 123.6 | 4.6      | 84.5     | 162.2 | 1.2             | 9.2      | 107.8 | 3.2      | 37.8     | 109.9 |
| 1998–2002 | 5.0             | 44.5     | 126.5 | 2.6      | 49.8     | 94.5  | 1.0             | 10.0     | 97.1  | 3.4      | 33.4     | 107.5 |
| 2003–2007 | 8.8             | 78.2     | 195.1 | 4.2      | 55.2     | 122.5 | 0.6             | 10.6     | 83.6  | 4.4      | 31.9     | 142.1 |
| 2008–2012 | 4.6             | 45.8     | 123.1 | 6.0      | 59.9     | 144.4 | 1.2             | 13.8     | 101.6 | 4.6      | 27.0     | 140.6 |

Secondary Medical Zone ID: 026

|           | Male            |                  |       |                 |                  |       | Female          |                  |       |                 |                  |       |
|-----------|-----------------|------------------|-------|-----------------|------------------|-------|-----------------|------------------|-------|-----------------|------------------|-------|
|           | Suicide         |                  |       | Suicide         |                  |       | Suicide         |                  |       | Suicide         |                  |       |
|           | Num<br>per year | Rate<br>/100,000 | × 100 | Num<br>per year | Rate<br>/100,000 | × 100 | Num<br>per year | Rate<br>/100,000 | × 100 | Num<br>per year | Rate<br>/100,000 | × 100 |
|           |                 |                  |       |                 |                  |       |                 |                  |       |                 |                  |       |
|           | Total (>10 y/o) |                  |       | 45–54           |                  |       | Total (>10 y/o) |                  |       | 45–54           |                  |       |
| 1983–1987 | 40.8            | 43.8             | 154.5 | 9.8             | 69.1             | 136.6 | 19.0            | 18.4             | 131.0 | 3.4             | 20.4             | 118.6 |
| 1988–1992 | 35.4            | 34.4             | 164.9 | 7.4             | 50.9             | 148.1 | 22.0            | 16.9             | 157.4 | 4.2             | 21.3             | 146.0 |
| 1993–1997 | 35.4            | 32.8             | 152.0 | 8.2             | 49.7             | 135.7 | 22.6            | 15.1             | 173.6 | 2.6             | 15.1             | 117.1 |
| 1998–2002 | 54.0            | 47.8             | 154.6 | 11.2            | 66.7             | 119.3 | 19.4            | 14.6             | 130.2 | 2.8             | 16.5             | 109.8 |
| 2003–2007 | 64.0            | 52.8             | 182.1 | 12.6            | 81.5             | 145.7 | 19.8            | 14.5             | 135.4 | 3.2             | 17.8             | 129.6 |
| 2008–2012 | 49.4            | 43.3             | 151.2 | 10.0            | 70.6             | 145.3 | 17.6            | 13.6             | 124.0 | 1.4             | 13.6             | 91.5  |
|           | 15–24           |                  |       | 55–64           |                  |       | 15–24           |                  |       | 55–64           |                  |       |
| 1983–1987 | 1.8             | 14.3             | 102.8 | 6.8             | 58.8             | 138.4 | 1.4             | 8.5              | 124.5 | 3.0             | 22.8             | 115.7 |
| 1988–1992 | 1.6             | 11.0             | 111.5 | 8.6             | 60.9             | 171.4 | 0.8             | 5.8              | 110.4 | 4.0             | 23.8             | 133.4 |
| 1993–1997 | 1.2             | 10.7             | 94.3  | 6.2             | 48.1             | 119.6 | 0.4             | 4.6              | 88.7  | 3.4             | 20.6             | 129.9 |
| 1998–2002 | 1.2             | 13.5             | 85.6  | 15.0            | 108.0            | 170.0 | 0.2             | 5.4              | 76.3  | 3.4             | 21.9             | 116.3 |
| 2003–2007 | 3.2             | 23.4             | 134.0 | 15.4            | 99.2             | 171.8 | 0.6             | 8.2              | 90.6  | 3.2             | 19.3             | 115.2 |
| 2008–2012 | 1.6             | 20.5             | 96.6  | 12.0            | 68.5             | 141.1 | 0.2             | 7.2              | 74.7  | 3.0             | 17.0             | 114.1 |
|           | 25–34           |                  |       | 65–74           |                  |       | 25–34           |                  |       | 65–74           |                  |       |
| 1983–1987 | 6.0             | 35.4             | 138.5 | 5.0             | 71.5             | 163.4 | 2.0             | 12.1             | 112.1 | 3.6             | 42.1             | 134.7 |
| 1988–1992 | 5.0             | 32.0             | 167.6 | 4.2             | 51.9             | 147.4 | 1.0             | 8.4              | 97.0  | 4.6             | 42.3             | 162.2 |
| 1993–1997 | 3.2             | 23.6             | 121.0 | 7.6             | 68.2             | 213.7 | 0.8             | 7.9              | 94.4  | 6.4             | 43.6             | 223.6 |
| 1998–2002 | 4.0             | 29.6             | 109.6 | 7.8             | 65.2             | 143.4 | 1.8             | 13.2             | 113.5 | 4.6             | 29.9             | 142.3 |
| 2003–2007 | 6.2             | 42.2             | 136.2 | 11.4            | 85.8             | 199.9 | 0.8             | 10.9             | 83.5  | 3.0             | 21.0             | 112.9 |
| 2008–2012 | 4.6             | 37.7             | 115.6 | 7.4             | 58.4             | 147.8 | 1.2             | 13.9             | 97.0  | 3.8             | 23.7             | 133.1 |
|           | 35–44           |                  |       | >74 y/o         |                  |       | 35–44           |                  |       | >74 y/o         |                  |       |
| 1983–1987 | 7.2             | 42.8             | 134.6 | 3.8             | 125.5            | 160.2 | 1.0             | 9.5              | 80.5  | 4.6             | 100.6            | 174.4 |
| 1988–1992 | 4.4             | 26.3             | 110.9 | 4.2             | 102.2            | 158.5 | 2.0             | 10.9             | 113.1 | 5.4             | 83.8             | 175.2 |
| 1993–1997 | 5.2             | 31.8             | 129.9 | 3.8             | 79.1             | 151.9 | 2.4             | 12.2             | 143.4 | 6.6             | 76.2             | 221.4 |
| 1998–2002 | 8.6             | 56.1             | 159.3 | 6.2             | 95.4             | 181.0 | 2.0             | 12.8             | 123.7 | 4.6             | 44.0             | 141.6 |
| 2003–2007 | 6.0             | 47.5             | 118.7 | 9.2             | 102.3            | 227.1 | 2.4             | 15.9             | 125.7 | 6.6             | 45.7             | 203.8 |
| 2008–2012 | 6.2             | 44.6             | 119.8 | 7.4             | 69.6             | 167.8 | 2.2             | 15.7             | 115.9 | 5.8             | 31.9             | 165.7 |

Secondary Medical Zone ID: 027

|           | Male            |          |       |          |          |       | Female          |          |       |          |          |       |
|-----------|-----------------|----------|-------|----------|----------|-------|-----------------|----------|-------|----------|----------|-------|
|           | Suicide         |          |       | Suicide  |          |       | Suicide         |          |       | Suicide  |          |       |
|           | Num             | Rate     | × 100 | Num      | Rate     | × 100 | Num             | Rate     | × 100 | Num      | Rate     | × 100 |
|           | per year        | /100,000 |       | per year | /100,000 |       | per year        | /100,000 |       | per year | /100,000 |       |
|           | Total (>10 y/o) |          |       | 45–54    |          |       | Total (>10 y/o) |          |       | 45–54    |          |       |
| 1983–1987 | 14.2            | 34.8     | 113.9 | 4.2      | 60.4     | 119.5 | 7.2             | 15.6     | 104.8 | 0.8      | 15.8     | 91.5  |
| 1988–1992 | 14.4            | 29.0     | 138.4 | 2.6      | 39.1     | 113.9 | 7.0             | 13.1     | 109.2 | 1.0      | 15.0     | 102.6 |
| 1993–1997 | 15.8            | 29.8     | 140.7 | 3.4      | 43.1     | 117.9 | 6.4             | 11.2     | 111.2 | 0.6      | 11.9     | 92.4  |
| 1998–2002 | 23.0            | 43.0     | 140.0 | 6.6      | 75.1     | 134.1 | 7.8             | 13.1     | 113.4 | 1.4      | 16.4     | 108.8 |
| 2003–2007 | 23.4            | 44.8     | 145.5 | 8.2      | 99.7     | 178.3 | 6.2             | 12.8     | 103.2 | 1.2      | 15.1     | 110.2 |
| 2008–2012 | 18.6            | 38.4     | 125.7 | 3.4      | 54.2     | 111.5 | 5.6             | 12.6     | 100.6 | 1.0      | 16.1     | 107.8 |
|           | 15–24           |          |       | 55–64    |          |       | 15–24           |          |       | 55–64    |          |       |
| 1983–1987 | 0.4             | 11.9     | 85.4  | 2.2      | 45.2     | 106.3 | 0.6             | 7.7      | 113.3 | 1.6      | 22.7     | 115.2 |
| 1988–1992 | 0.6             | 10.2     | 102.9 | 2.8      | 44.2     | 124.6 | 0.0             | 4.3      | 80.9  | 1.6      | 20.7     | 115.7 |
| 1993–1997 | 0.6             | 11.3     | 100.1 | 3.6      | 51.9     | 129.0 | 0.2             | 5.0      | 96.3  | 1.8      | 20.5     | 128.7 |
| 1998–2002 | 0.6             | 15.2     | 95.9  | 6.6      | 93.1     | 146.5 | 0.0             | 5.9      | 83.5  | 1.6      | 20.9     | 111.3 |
| 2003–2007 | 0.4             | 16.1     | 92.1  | 5.0      | 71.7     | 124.2 | 0.2             | 8.4      | 93.3  | 1.6      | 18.9     | 112.6 |
| 2008–2012 | 1.6             | 27.1     | 128.0 | 3.2      | 48.5     | 99.8  | 0.2             | 9.3      | 96.3  | 1.2      | 15.6     | 104.5 |
|           | 25–34           |          |       | 65–74    |          |       | 25–34           |          |       | 65–74    |          |       |
| 1983–1987 | 1.4             | 23.3     | 91.2  | 2.6      | 63.8     | 145.8 | 0.6             | 10.1     | 93.6  | 1.4      | 33.8     | 108.1 |
| 1988–1992 | 1.2             | 19.9     | 103.9 | 1.2      | 36.7     | 104.2 | 0.0             | 6.6      | 76.6  | 1.4      | 28.3     | 108.6 |
| 1993–1997 | 1.8             | 24.4     | 125.1 | 2.0      | 40.7     | 127.5 | 0.2             | 7.5      | 89.6  | 1.4      | 22.7     | 116.5 |
| 1998–2002 | 1.6             | 27.7     | 102.6 | 2.0      | 45.1     | 99.1  | 0.4             | 10.9     | 94.0  | 1.8      | 25.3     | 120.3 |
| 2003–2007 | 3.0             | 40.5     | 130.5 | 2.4      | 46.3     | 107.8 | 0.2             | 11.1     | 85.7  | 1.0      | 18.3     | 98.1  |
| 2008–2012 | 2.0             | 36.1     | 110.9 | 2.8      | 47.1     | 119.3 | 0.2             | 12.6     | 88.2  | 1.4      | 19.8     | 111.3 |
|           | 35–44           |          |       | >74 y/o  |          |       | 35–44           |          |       | >74 y/o  |          |       |
| 1983–1987 | 2.0             | 30.1     | 94.4  | 1.4      | 88.2     | 112.6 | 0.8             | 11.6     | 98.6  | 1.4      | 59.2     | 102.7 |
| 1988–1992 | 3.0             | 31.4     | 132.7 | 3.0      | 111.1    | 172.3 | 0.6             | 9.3      | 96.0  | 2.2      | 61.8     | 129.2 |
| 1993–1997 | 2.6             | 31.5     | 128.4 | 1.8      | 69.3     | 133.0 | 0.8             | 9.5      | 111.9 | 1.4      | 35.5     | 103.3 |
| 1998–2002 | 3.6             | 47.9     | 136.0 | 2.0      | 66.0     | 125.2 | 0.4             | 9.6      | 92.8  | 2.2      | 39.8     | 128.1 |
| 2003–2007 | 2.2             | 40.9     | 102.2 | 2.0      | 54.0     | 119.9 | 1.0             | 14.2     | 112.7 | 1.0      | 19.3     | 86.1  |
| 2008–2012 | 2.8             | 42.1     | 113.2 | 2.8      | 56.0     | 134.9 | 0.4             | 12.6     | 92.6  | 1.2      | 18.5     | 96.2  |

Secondary Medical Zone ID: 028

|                 | Male            |                  |       |                 |                  |       | Female          |                  |       |                 |                  |       |
|-----------------|-----------------|------------------|-------|-----------------|------------------|-------|-----------------|------------------|-------|-----------------|------------------|-------|
|                 | Suicide         |                  |       | Suicide         |                  |       | Suicide         |                  |       | Suicide         |                  |       |
|                 | Num<br>per year | Rate<br>/100,000 | × 100 | Num<br>per year | Rate<br>/100,000 | × 100 | Num<br>per year | Rate<br>/100,000 | × 100 | Num<br>per year | Rate<br>/100,000 | × 100 |
|                 |                 |                  |       |                 |                  |       |                 |                  |       |                 |                  |       |
| Total (>10 y/o) | 45–54           | Total (>10 y/o)  | 45–54 |                 |                  |       |                 |                  |       |                 |                  |       |
| 1983–1987       | 84.8            | 44.8             | 148.2 | 21.8            | 74.8             | 148.0 | 34.8            | 17.1             | 114.7 | 6.0             | 18.7             | 108.5 |
| 1988–1992       | 61.0            | 29.9             | 128.5 | 12.0            | 40.4             | 117.6 | 37.2            | 15.0             | 125.6 | 5.0             | 15.4             | 105.6 |
| 1993–1997       | 68.4            | 30.6             | 129.2 | 15.6            | 44.6             | 122.0 | 31.2            | 11.5             | 113.8 | 4.4             | 12.8             | 98.8  |
| 1998–2002       | 101.4           | 42.5             | 125.5 | 26.6            | 70.4             | 125.8 | 38.6            | 13.0             | 113.7 | 6.2             | 16.2             | 107.3 |
| 2003–2007       | 110.2           | 46.0             | 133.1 | 24.6            | 70.4             | 125.9 | 45.6            | 14.7             | 132.5 | 5.6             | 15.2             | 111.2 |
| 2008–2012       | 94.6            | 40.5             | 122.2 | 18.6            | 57.7             | 118.8 | 40.4            | 13.9             | 118.0 | 4.8             | 14.9             | 99.7  |
|                 | 15–24           |                  |       | 55–64           |                  |       | 15–24           |                  |       | 55–64           |                  |       |
| 1983–1987       | 6.8             | 20.7             | 148.4 | 13.6            | 58.5             | 137.7 | 1.8             | 6.3              | 92.0  | 5.8             | 22.3             | 113.0 |
| 1988–1992       | 3.6             | 10.6             | 106.7 | 12.6            | 46.5             | 131.0 | 1.4             | 4.6              | 87.6  | 4.6             | 16.6             | 92.9  |
| 1993–1997       | 2.0             | 7.9              | 69.7  | 16.0            | 56.1             | 139.2 | 1.2             | 4.1              | 79.4  | 4.8             | 15.8             | 99.5  |
| 1998–2002       | 4.8             | 15.1             | 95.4  | 20.4            | 72.2             | 113.6 | 1.0             | 4.6              | 65.4  | 6.6             | 20.4             | 108.6 |
| 2003–2007       | 7.0             | 21.8             | 124.8 | 25.4            | 76.7             | 132.9 | 2.4             | 8.4              | 93.5  | 8.0             | 21.0             | 125.6 |
| 2008–2012       | 8.0             | 27.7             | 130.8 | 17.0            | 48.7             | 100.3 | 2.8             | 10.4             | 107.6 | 7.0             | 17.5             | 117.6 |
|                 | 25–34           |                  |       | 65–74           |                  |       | 25–34           |                  |       | 65–74           |                  |       |
| 1983–1987       | 10.2            | 29.4             | 115.0 | 10.4            | 78.2             | 178.7 | 4.4             | 12.1             | 112.4 | 6.0             | 37.3             | 119.5 |
| 1988–1992       | 7.2             | 22.4             | 117.3 | 5.6             | 38.1             | 108.1 | 3.2             | 9.5              | 110.1 | 7.2             | 35.0             | 134.1 |
| 1993–1997       | 6.4             | 20.7             | 106.1 | 8.0             | 39.9             | 125.0 | 2.6             | 8.3              | 100.1 | 7.4             | 28.7             | 147.1 |
| 1998–2002       | 10.2            | 30.6             | 113.2 | 15.2            | 62.2             | 136.8 | 2.2             | 8.6              | 74.4  | 7.6             | 26.0             | 123.8 |
| 2003–2007       | 13.6            | 40.9             | 131.7 | 11.4            | 47.4             | 110.4 | 5.4             | 15.7             | 120.6 | 8.6             | 26.4             | 142.0 |
| 2008–2012       | 11.4            | 38.8             | 119.2 | 11.4            | 45.5             | 115.1 | 3.0             | 12.1             | 84.5  | 9.2             | 26.8             | 150.7 |
|                 | 35–44           |                  |       | >74 y/o         |                  |       | 35–44           |                  |       | >74 y/o         |                  |       |
| 1983–1987       | 16.0            | 44.4             | 139.5 | 5.6             | 97.5             | 124.5 | 2.4             | 8.6              | 72.6  | 8.0             | 90.1             | 156.1 |
| 1988–1992       | 12.0            | 31.3             | 132.1 | 7.8             | 94.1             | 145.9 | 2.6             | 8.0              | 82.8  | 13.2            | 98.0             | 204.9 |
| 1993–1997       | 12.0            | 32.8             | 133.8 | 8.0             | 79.4             | 152.6 | 2.2             | 7.0              | 82.2  | 8.4             | 49.0             | 142.4 |
| 1998–2002       | 14.4            | 42.8             | 121.6 | 9.6             | 74.4             | 141.1 | 2.4             | 8.3              | 80.4  | 12.4            | 54.4             | 175.2 |
| 2003–2007       | 16.4            | 51.6             | 128.8 | 11.8            | 67.4             | 149.7 | 3.8             | 12.2             | 96.8  | 11.8            | 39.7             | 177.1 |
| 2008–2012       | 15.8            | 47.1             | 126.7 | 12.2            | 56.9             | 137.1 | 4.4             | 13.7             | 101.1 | 9.0             | 24.9             | 129.2 |

Secondary Medical Zone ID: 029

|           | Male            |                  |       |                 |                  |       | Female          |                  |       |                 |                  |       |
|-----------|-----------------|------------------|-------|-----------------|------------------|-------|-----------------|------------------|-------|-----------------|------------------|-------|
|           | Suicide         |                  |       | Suicide         |                  |       | Suicide         |                  |       | Suicide         |                  |       |
|           | Num<br>per year | Rate<br>/100,000 | × 100 | Num<br>per year | Rate<br>/100,000 | × 100 | Num<br>per year | Rate<br>/100,000 | × 100 | Num<br>per year | Rate<br>/100,000 | × 100 |
|           |                 |                  |       |                 |                  |       |                 |                  |       |                 |                  |       |
|           | Total (>10 y/o) |                  |       | 45–54           |                  |       | Total (>10 y/o) |                  |       | 45–54           |                  |       |
| 1983–1987 | 54.2            | 46.9             | 165.2 | 16.4            | 90.8             | 179.6 | 28.8            | 20.2             | 149.9 | 3.8             | 19.2             | 111.6 |
| 1988–1992 | 43.2            | 34.4             | 161.9 | 10.2            | 57.5             | 167.4 | 30.6            | 17.8             | 168.0 | 3.0             | 16.0             | 109.4 |
| 1993–1997 | 42.8            | 32.9             | 148.4 | 9.0             | 48.1             | 131.5 | 20.0            | 12.0             | 127.1 | 2.6             | 14.0             | 108.1 |
| 1998–2002 | 62.0            | 46.3             | 145.8 | 16.4            | 82.6             | 147.5 | 28.2            | 15.1             | 145.9 | 3.2             | 16.6             | 110.3 |
| 2003–2007 | 63.4            | 48.4             | 148.9 | 13.8            | 77.9             | 139.4 | 22.4            | 13.4             | 125.0 | 1.8             | 12.6             | 91.7  |
| 2008–2012 | 54.8            | 42.4             | 139.0 | 10.6            | 65.1             | 134.0 | 23.4            | 14.5             | 130.0 | 2.2             | 15.3             | 102.8 |
|           | 15–24           |                  |       | 55–64           |                  |       | 15–24           |                  |       | 55–64           |                  |       |
| 1983–1987 | 2.4             | 16.7             | 119.8 | 10.8            | 67.7             | 159.2 | 1.0             | 7.3              | 107.3 | 4.8             | 25.4             | 128.6 |
| 1988–1992 | 1.8             | 11.1             | 112.5 | 8.0             | 47.0             | 132.2 | 0.8             | 5.7              | 107.2 | 6.6             | 28.6             | 159.9 |
| 1993–1997 | 1.0             | 9.3              | 82.4  | 11.0            | 61.8             | 153.5 | 0.2             | 3.9              | 73.8  | 3.2             | 17.0             | 107.2 |
| 1998–2002 | 3.4             | 19.9             | 125.8 | 12.0            | 76.6             | 120.5 | 0.6             | 6.2              | 88.7  | 4.2             | 21.7             | 115.5 |
| 2003–2007 | 2.4             | 18.7             | 107.4 | 12.6            | 73.5             | 127.4 | 0.6             | 7.5              | 83.4  | 4.6             | 21.5             | 128.1 |
| 2008–2012 | 4.6             | 31.8             | 150.0 | 13.0            | 65.7             | 135.3 | 0.8             | 9.2              | 94.8  | 2.2             | 13.8             | 92.7  |
|           | 25–34           |                  |       | 65–74           |                  |       | 25–34           |                  |       | 65–74           |                  |       |
| 1983–1987 | 4.4             | 27.5             | 107.7 | 5.0             | 56.8             | 129.6 | 1.6             | 10.6             | 98.9  | 7.4             | 56.4             | 180.4 |
| 1988–1992 | 3.8             | 24.7             | 129.3 | 5.8             | 52.6             | 149.3 | 1.6             | 10.1             | 116.8 | 8.0             | 51.6             | 197.8 |
| 1993–1997 | 2.8             | 20.3             | 103.7 | 5.6             | 42.4             | 133.0 | 0.8             | 7.5              | 90.5  | 5.8             | 31.9             | 163.8 |
| 1998–2002 | 6.4             | 36.4             | 134.9 | 8.4             | 56.1             | 123.5 | 1.6             | 11.8             | 102.0 | 6.6             | 32.4             | 154.0 |
| 2003–2007 | 5.6             | 35.0             | 112.9 | 9.4             | 61.0             | 142.2 | 1.6             | 12.6             | 97.1  | 5.4             | 26.2             | 141.0 |
| 2008–2012 | 4.8             | 35.1             | 107.7 | 6.2             | 44.8             | 113.5 | 2.0             | 15.2             | 106.3 | 4.4             | 22.7             | 127.3 |
|           | 35–44           |                  |       | >74 y/o         |                  |       | 35–44           |                  |       | >74 y/o         |                  |       |
| 1983–1987 | 9.4             | 49.1             | 154.4 | 5.6             | 123.2            | 157.3 | 3.2             | 15.1             | 127.7 | 7.0             | 103.1            | 178.7 |
| 1988–1992 | 6.0             | 30.8             | 130.0 | 7.2             | 118.1            | 183.1 | 1.8             | 10.0             | 103.3 | 8.8             | 92.8             | 194.0 |
| 1993–1997 | 8.2             | 42.0             | 171.2 | 5.2             | 76.1             | 146.0 | 1.0             | 7.5              | 87.7  | 6.4             | 53.8             | 156.4 |
| 1998–2002 | 7.4             | 45.2             | 128.4 | 8.0             | 89.5             | 169.9 | 1.8             | 11.4             | 110.6 | 10.2            | 64.5             | 207.6 |
| 2003–2007 | 10.8            | 66.3             | 165.4 | 8.6             | 74.2             | 164.7 | 1.4             | 11.7             | 92.6  | 7.0             | 35.7             | 159.2 |
| 2008–2012 | 6.8             | 42.2             | 113.5 | 8.8             | 63.7             | 153.5 | 3.0             | 16.9             | 124.7 | 8.8             | 35.7             | 185.5 |

Secondary Medical Zone ID: 030

|                 | Male            |                  |       |                 |                  |       | Female          |                  |       |                 |                  |       |
|-----------------|-----------------|------------------|-------|-----------------|------------------|-------|-----------------|------------------|-------|-----------------|------------------|-------|
|                 | Suicide         |                  |       | Suicide         |                  |       | Suicide         |                  |       | Suicide         |                  |       |
|                 | Num<br>per year | Rate<br>/100,000 | × 100 | Num<br>per year | Rate<br>/100,000 | × 100 | Num<br>per year | Rate<br>/100,000 | × 100 | Num<br>per year | Rate<br>/100,000 | × 100 |
|                 |                 |                  |       |                 |                  |       |                 |                  |       |                 |                  |       |
| Total (>10 y/o) | 45–54           | Total (>10 y/o)  | 45–54 |                 |                  |       |                 |                  |       |                 |                  |       |
| 1983–1987       | 28.6            | 38.6             | 134.6 | 9.0             | 74.8             | 147.9 | 14.2            | 16.7             | 117.4 | 2.0             | 17.1             | 99.2  |
| 1988–1992       | 24.0            | 30.3             | 138.0 | 5.6             | 48.8             | 142.0 | 12.2            | 13.3             | 109.2 | 2.2             | 16.8             | 115.0 |
| 1993–1997       | 22.4            | 28.8             | 122.7 | 4.8             | 42.3             | 115.5 | 9.0             | 10.4             | 95.6  | 1.6             | 13.8             | 106.8 |
| 1998–2002       | 32.8            | 40.3             | 122.6 | 9.0             | 71.7             | 128.1 | 15.8            | 14.0             | 128.0 | 2.0             | 16.4             | 108.6 |
| 2003–2007       | 39.8            | 47.2             | 147.3 | 11.0            | 91.3             | 163.2 | 12.8            | 12.2             | 114.6 | 0.6             | 11.0             | 80.6  |
| 2008–2012       | 29.2            | 37.7             | 119.3 | 7.4             | 67.4             | 138.7 | 11.6            | 12.5             | 109.3 | 0.6             | 12.1             | 81.1  |
|                 | 15–24           |                  |       | 55–64           |                  |       | 15–24           |                  |       | 55–64           |                  |       |
| 1983–1987       | 2.2             | 20.0             | 143.6 | 5.0             | 51.0             | 120.0 | 0.0             | 5.0              | 72.9  | 2.4             | 21.2             | 107.5 |
| 1988–1992       | 0.8             | 9.9              | 100.4 | 3.6             | 35.6             | 100.1 | 0.4             | 5.2              | 99.3  | 2.0             | 17.5             | 98.1  |
| 1993–1997       | 1.2             | 12.1             | 106.8 | 3.6             | 37.8             | 94.0  | 0.0             | 3.8              | 73.0  | 1.0             | 12.4             | 78.0  |
| 1998–2002       | 1.0             | 14.6             | 92.4  | 6.8             | 69.7             | 109.7 | 0.6             | 7.3              | 103.8 | 2.4             | 20.4             | 108.2 |
| 2003–2007       | 1.0             | 16.4             | 94.1  | 9.0             | 79.2             | 137.1 | 0.6             | 9.1              | 101.0 | 2.0             | 17.7             | 105.5 |
| 2008–2012       | 1.4             | 21.7             | 102.5 | 8.0             | 61.7             | 127.0 | 0.2             | 7.9              | 81.3  | 1.4             | 14.3             | 95.8  |
|                 | 25–34           |                  |       | 65–74           |                  |       | 25–34           |                  |       | 65–74           |                  |       |
| 1983–1987       | 3.6             | 31.6             | 123.6 | 2.2             | 42.1             | 96.2  | 1.0             | 10.6             | 98.6  | 4.0             | 45.3             | 145.1 |
| 1988–1992       | 3.0             | 27.2             | 142.6 | 3.2             | 44.4             | 126.0 | 0.6             | 8.2              | 94.5  | 2.6             | 28.9             | 110.9 |
| 1993–1997       | 2.6             | 25.2             | 129.1 | 3.2             | 37.6             | 118.0 | 1.2             | 10.4             | 124.7 | 2.4             | 22.1             | 113.6 |
| 1998–2002       | 3.2             | 31.5             | 116.8 | 6.0             | 57.6             | 126.8 | 0.2             | 9.1              | 78.4  | 4.0             | 29.1             | 138.7 |
| 2003–2007       | 4.6             | 41.6             | 134.0 | 4.6             | 48.0             | 111.8 | 0.4             | 10.6             | 81.2  | 3.0             | 22.7             | 122.0 |
| 2008–2012       | 2.8             | 33.8             | 103.8 | 2.8             | 36.9             | 93.5  | 0.6             | 12.7             | 88.8  | 2.4             | 20.2             | 113.8 |
|                 | 35–44           |                  |       | >74 y/o         |                  |       | 35–44           |                  |       | >74 y/o         |                  |       |
| 1983–1987       | 3.8             | 35.3             | 110.8 | 2.8             | 95.0             | 121.3 | 1.6             | 13.1             | 111.3 | 3.2             | 73.3             | 127.0 |
| 1988–1992       | 3.8             | 29.6             | 125.0 | 4.0             | 92.6             | 143.6 | 0.8             | 8.9              | 92.7  | 3.6             | 57.7             | 120.5 |
| 1993–1997       | 4.8             | 37.1             | 151.3 | 2.2             | 51.7             | 99.3  | 0.4             | 6.9              | 80.9  | 2.4             | 32.5             | 94.5  |
| 1998–2002       | 4.2             | 40.9             | 116.1 | 2.6             | 50.7             | 96.3  | 1.6             | 13.0             | 125.8 | 5.0             | 47.4             | 152.6 |
| 2003–2007       | 4.8             | 50.7             | 126.6 | 4.8             | 61.6             | 136.7 | 0.0             | 8.8              | 69.9  | 6.2             | 44.5             | 198.5 |
| 2008–2012       | 2.4             | 33.7             | 90.7  | 4.4             | 49.3             | 118.8 | 1.2             | 14.1             | 104.2 | 5.2             | 31.2             | 162.0 |

Secondary Medical Zone ID: 031

|           | Male            |          |       |          |          |       | Female          |          |       |          |          |       |
|-----------|-----------------|----------|-------|----------|----------|-------|-----------------|----------|-------|----------|----------|-------|
|           | Suicide         |          |       | Suicide  |          |       | Suicide         |          |       | Suicide  |          |       |
|           | Num             | Rate     | × 100 | Num      | Rate     | × 100 | Num             | Rate     | × 100 | Num      | Rate     | × 100 |
|           | per year        | /100,000 |       | per year | /100,000 |       | per year        | /100,000 |       | per year | /100,000 |       |
|           | Total (>10 y/o) |          |       | 45–54    |          |       | Total (>10 y/o) |          |       | 45–54    |          |       |
| 1983–1987 | 24.4            | 35.0     | 111.1 | 4.6      | 46.6     | 92.2  | 17.2            | 17.7     | 127.8 | 1.2      | 13.9     | 80.8  |
| 1988–1992 | 19.4            | 25.9     | 109.9 | 3.6      | 36.5     | 106.1 | 17.6            | 15.5     | 139.7 | 1.8      | 15.6     | 106.7 |
| 1993–1997 | 21.6            | 27.7     | 115.0 | 5.0      | 42.7     | 116.6 | 10.8            | 11.0     | 105.9 | 1.4      | 13.3     | 102.6 |
| 1998–2002 | 38.6            | 45.1     | 139.2 | 9.4      | 72.8     | 130.0 | 15.2            | 13.5     | 122.6 | 1.4      | 14.4     | 95.7  |
| 2003–2007 | 32.8            | 42.6     | 124.2 | 6.6      | 60.5     | 108.2 | 12.8            | 13.0     | 114.9 | 1.4      | 13.8     | 101.0 |
| 2008–2012 | 29.4            | 39.9     | 122.5 | 5.6      | 56.9     | 117.0 | 13.0            | 13.7     | 118.7 | 2.0      | 17.8     | 119.6 |
|           | 15–24           |          |       | 55–64    |          |       | 15–24           |          |       | 55–64    |          |       |
| 1983–1987 | 1.2             | 14.5     | 103.9 | 4.6      | 44.6     | 104.9 | 0.4             | 6.4      | 93.7  | 4.0      | 26.9     | 136.3 |
| 1988–1992 | 0.6             | 9.2      | 92.5  | 5.6      | 45.9     | 129.2 | 0.6             | 5.9      | 112.2 | 3.6      | 23.0     | 129.0 |
| 1993–1997 | 0.8             | 10.7     | 94.4  | 3.6      | 37.7     | 93.6  | 0.2             | 4.5      | 86.3  | 2.6      | 19.0     | 119.4 |
| 1998–2002 | 1.4             | 16.3     | 103.1 | 7.6      | 75.3     | 118.6 | 0.6             | 7.3      | 104.5 | 1.6      | 17.6     | 93.7  |
| 2003–2007 | 0.8             | 15.7     | 89.9  | 7.2      | 67.0     | 116.0 | 0.4             | 8.3      | 92.2  | 2.0      | 17.9     | 106.7 |
| 2008–2012 | 2.0             | 25.8     | 121.8 | 7.2      | 57.1     | 117.6 | 0.0             | 7.1      | 73.1  | 2.8      | 18.8     | 125.8 |
|           | 25–34           |          |       | 65–74    |          |       | 25–34           |          |       | 65–74    |          |       |
| 1983–1987 | 3.6             | 30.8     | 120.4 | 2.6      | 43.6     | 99.5  | 2.0             | 14.6     | 135.7 | 4.0      | 43.4     | 139.0 |
| 1988–1992 | 2.0             | 21.1     | 110.2 | 2.0      | 31.2     | 88.5  | 2.0             | 13.4     | 154.8 | 4.0      | 36.8     | 141.2 |
| 1993–1997 | 1.8             | 20.9     | 107.1 | 3.0      | 33.4     | 104.8 | 1.0             | 9.7      | 116.2 | 1.0      | 13.1     | 67.2  |
| 1998–2002 | 5.2             | 42.8     | 158.6 | 4.2      | 44.6     | 98.2  | 1.0             | 12.2     | 105.4 | 3.2      | 24.3     | 115.8 |
| 2003–2007 | 3.2             | 35.8     | 115.5 | 3.8      | 42.8     | 99.6  | 1.2             | 14.2     | 109.5 | 2.6      | 21.0     | 112.7 |
| 2008–2012 | 3.6             | 39.8     | 122.2 | 2.8      | 37.2     | 94.2  | 0.6             | 13.1     | 91.7  | 2.0      | 19.0     | 106.9 |
|           | 35–44           |          |       | >74 y/o  |          |       | 35–44           |          |       | >74 y/o  |          |       |
| 1983–1987 | 5.2             | 42.5     | 133.5 | 2.6      | 81.0     | 103.4 | 2.4             | 16.1     | 136.0 | 3.2      | 61.9     | 107.2 |
| 1988–1992 | 3.4             | 27.2     | 114.5 | 2.2      | 58.2     | 90.2  | 1.2             | 10.2     | 105.5 | 4.4      | 62.8     | 131.3 |
| 1993–1997 | 4.8             | 36.5     | 148.7 | 2.6      | 53.4     | 102.5 | 0.4             | 6.9      | 80.6  | 4.0      | 46.0     | 133.6 |
| 1998–2002 | 6.8             | 57.6     | 163.4 | 3.8      | 60.3     | 114.3 | 0.8             | 9.9      | 96.0  | 6.4      | 55.1     | 177.4 |
| 2003–2007 | 6.2             | 63.1     | 157.6 | 4.6      | 55.9     | 124.1 | 0.4             | 10.5     | 82.8  | 4.8      | 33.9     | 150.9 |
| 2008–2012 | 4.6             | 46.9     | 126.0 | 3.6      | 41.4     | 99.8  | 1.2             | 14.5     | 106.7 | 4.4      | 26.3     | 136.6 |



Secondary Medical Zone ID: 032

|                 | Male            |                  |       |                 |                  |       | Female          |                  |       |                 |                  |       |
|-----------------|-----------------|------------------|-------|-----------------|------------------|-------|-----------------|------------------|-------|-----------------|------------------|-------|
|                 | Suicide         |                  |       | Suicide         |                  |       | Suicide         |                  |       | Suicide         |                  |       |
|                 | Num<br>per year | Rate<br>/100,000 | × 100 | Num<br>per year | Rate<br>/100,000 | × 100 | Num<br>per year | Rate<br>/100,000 | × 100 | Num<br>per year | Rate<br>/100,000 | × 100 |
|                 |                 |                  |       |                 |                  |       |                 |                  |       |                 |                  |       |
| Total (>10 y/o) | 45–54           | Total (>10 y/o)  | 45–54 |                 |                  |       |                 |                  |       |                 |                  |       |
| 1983–1987       | 16.2            | 37.0             | 127.9 | 3.6             | 55.3             | 109.3 | 7.8             | 15.9             | 108.0 | 1.0             | 16.5             | 95.7  |
| 1988–1992       | 10.8            | 26.1             | 112.8 | 2.2             | 36.6             | 106.6 | 10.8            | 15.5             | 145.0 | 1.0             | 14.9             | 101.8 |
| 1993–1997       | 11.4            | 26.9             | 114.3 | 2.8             | 41.8             | 114.2 | 7.6             | 11.8             | 123.8 | 0.8             | 12.9             | 100.2 |
| 1998–2002       | 18.0            | 39.4             | 123.3 | 3.8             | 61.4             | 109.7 | 8.6             | 13.4             | 121.3 | 1.4             | 17.2             | 114.0 |
| 2003–2007       | 19.0            | 43.7             | 134.3 | 6.8             | 99.5             | 177.9 | 6.2             | 12.7             | 105.5 | 0.4             | 12.5             | 90.9  |
| 2008–2012       | 12.8            | 35.8             | 106.4 | 4.2             | 66.4             | 136.6 | 6.2             | 13.7             | 107.9 | 0.8             | 15.6             | 104.6 |
|                 | 15–24           |                  |       | 55–64           |                  |       | 15–24           |                  |       | 55–64           |                  |       |
| 1983–1987       | 0.8             | 14.5             | 103.7 | 1.4             | 36.0             | 84.6  | 0.6             | 7.9              | 116.0 | 1.6             | 21.9             | 111.1 |
| 1988–1992       | 0.2             | 8.9              | 89.4  | 2.0             | 35.3             | 99.5  | 0.2             | 5.2              | 98.7  | 1.4             | 19.0             | 106.3 |
| 1993–1997       | 0.0             | 9.3              | 82.2  | 2.0             | 38.5             | 95.5  | 0.0             | 4.5              | 85.4  | 1.4             | 17.9             | 112.7 |
| 1998–2002       | 0.4             | 14.8             | 93.7  | 3.6             | 65.7             | 103.4 | 0.2             | 6.9              | 98.2  | 1.6             | 20.7             | 110.2 |
| 2003–2007       | 1.2             | 21.0             | 120.4 | 3.8             | 64.2             | 111.2 | 0.2             | 8.7              | 96.9  | 1.4             | 18.3             | 109.4 |
| 2008–2012       | 0.8             | 22.5             | 106.1 | 1.8             | 43.2             | 88.8  | 0.4             | 10.8             | 111.4 | 1.2             | 16.2             | 108.9 |
|                 | 25–34           |                  |       | 65–74           |                  |       | 25–34           |                  |       | 65–74           |                  |       |
| 1983–1987       | 1.4             | 26.2             | 102.4 | 2.0             | 53.8             | 122.9 | 0.4             | 10.0             | 92.4  | 1.2             | 30.8             | 98.6  |
| 1988–1992       | 0.8             | 18.6             | 97.6  | 1.8             | 42.4             | 120.4 | 0.6             | 9.6              | 110.3 | 2.2             | 35.5             | 136.0 |
| 1993–1997       | 0.4             | 16.7             | 85.5  | 1.0             | 28.0             | 87.7  | 0.6             | 9.4              | 112.8 | 2.0             | 26.5             | 135.9 |
| 1998–2002       | 1.2             | 28.0             | 103.5 | 4.8             | 67.1             | 147.5 | 0.6             | 12.2             | 105.6 | 1.8             | 24.3             | 115.8 |
| 2003–2007       | 1.2             | 31.8             | 102.4 | 2.2             | 43.1             | 100.5 | 0.6             | 13.8             | 105.8 | 2.2             | 24.6             | 132.3 |
| 2008–2012       | 0.8             | 31.6             | 96.9  | 1.2             | 34.1             | 86.4  | 0.4             | 14.3             | 100.1 | 1.2             | 18.6             | 104.4 |
|                 | 35–44           |                  |       | >74 y/o         |                  |       | 35–44           |                  |       | >74 y/o         |                  |       |
| 1983–1987       | 4.0             | 47.3             | 148.6 | 3.0             | 125.7            | 160.4 | 0.4             | 10.4             | 87.9  | 2.6             | 80.2             | 139.0 |
| 1988–1992       | 2.0             | 28.0             | 118.2 | 1.8             | 76.0             | 117.8 | 1.6             | 13.3             | 138.0 | 3.8             | 86.2             | 180.2 |
| 1993–1997       | 2.6             | 35.2             | 143.5 | 2.4             | 76.4             | 146.6 | 0.6             | 9.2              | 108.2 | 2.2             | 45.1             | 131.1 |
| 1998–2002       | 3.0             | 47.3             | 134.4 | 1.2             | 47.4             | 90.0  | 0.2             | 9.1              | 87.8  | 2.8             | 43.8             | 141.2 |
| 2003–2007       | 2.2             | 45.4             | 113.2 | 1.6             | 43.9             | 97.6  | 0.0             | 10.3             | 81.4  | 1.4             | 21.3             | 95.0  |
| 2008–2012       | 1.2             | 35.5             | 95.4  | 2.8             | 50.7             | 122.3 | 1.0             | 15.5             | 114.6 | 1.2             | 17.1             | 89.1  |

Secondary Medical Zone ID: 033

|           | Male            |          |       |          |          |       | Female          |          |       |          |          |       |
|-----------|-----------------|----------|-------|----------|----------|-------|-----------------|----------|-------|----------|----------|-------|
|           | Suicide         |          |       | Suicide  |          |       | Suicide         |          |       | Suicide  |          |       |
|           | Num             | Rate     | × 100 | Num      | Rate     | × 100 | Num             | Rate     | × 100 | Num      | Rate     | × 100 |
|           | per year        | /100,000 |       | per year | /100,000 |       | per year        | /100,000 |       | per year | /100,000 |       |
|           | Total (>10 y/o) |          |       | 45–54    |          |       | Total (>10 y/o) |          |       | 45–54    |          |       |
| 1983–1987 | 15.6            | 37.0     | 131.4 | 4.0      | 59.8     | 118.2 | 6.4             | 15.4     | 103.7 | 0.8      | 15.6     | 90.3  |
| 1988–1992 | 8.2             | 24.8     | 101.6 | 1.4      | 31.1     | 90.7  | 5.4             | 12.8     | 100.9 | 0.4      | 12.8     | 87.6  |
| 1993–1997 | 8.4             | 25.3     | 102.1 | 2.4      | 40.5     | 110.6 | 6.0             | 11.6     | 116.8 | 1.2      | 15.0     | 116.0 |
| 1998–2002 | 17.4            | 41.0     | 135.8 | 5.2      | 77.4     | 138.3 | 3.4             | 11.7     | 83.2  | 0.4      | 13.7     | 90.9  |
| 2003–2007 | 16.8            | 43.6     | 142.1 | 3.6      | 71.4     | 127.6 | 3.6             | 12.2     | 91.0  | 0.4      | 13.0     | 94.8  |
| 2008–2012 | 12.0            | 37.3     | 117.5 | 3.0      | 61.8     | 127.2 | 5.2             | 13.7     | 108.9 | 1.2      | 18.5     | 124.3 |
|           | 15–24           |          |       | 55–64    |          |       | 15–24           |          |       | 55–64    |          |       |
| 1983–1987 | 0.4             | 12.9     | 92.5  | 3.2      | 53.8     | 126.5 | 0.0             | 5.7      | 82.8  | 1.2      | 20.4     | 103.3 |
| 1988–1992 | 0.2             | 9.3      | 94.2  | 2.0      | 37.3     | 105.1 | 0.4             | 6.1      | 115.8 | 1.0      | 17.6     | 98.3  |
| 1993–1997 | 0.6             | 12.4     | 109.9 | 1.4      | 35.4     | 88.0  | 0.2             | 5.4      | 102.9 | 1.0      | 16.2     | 102.0 |
| 1998–2002 | 0.2             | 14.6     | 92.7  | 4.4      | 77.7     | 122.3 | 0.2             | 7.1      | 101.1 | 0.0      | 14.2     | 75.6  |
| 2003–2007 | 0.8             | 20.0     | 114.6 | 3.8      | 69.6     | 120.6 | 0.2             | 9.1      | 100.8 | 0.8      | 16.6     | 99.0  |
| 2008–2012 | 0.6             | 22.8     | 107.6 | 2.2      | 48.6     | 100.0 | 0.4             | 11.2     | 115.8 | 0.6      | 14.5     | 97.5  |
|           | 25–34           |          |       | 65–74    |          |       | 25–34           |          |       | 65–74    |          |       |
| 1983–1987 | 2.2             | 32.4     | 126.8 | 1.6      | 49.0     | 112.0 | 0.6             | 11.0     | 102.0 | 1.2      | 32.1     | 102.8 |
| 1988–1992 | 1.4             | 25.1     | 131.4 | 1.2      | 36.6     | 103.8 | 0.0             | 7.1      | 81.9  | 1.4      | 29.1     | 111.5 |
| 1993–1997 | 0.8             | 20.7     | 105.8 | 1.4      | 34.1     | 106.8 | 0.2             | 7.9      | 95.2  | 1.0      | 19.9     | 102.0 |
| 1998–2002 | 1.0             | 28.0     | 103.9 | 3.6      | 60.9     | 133.9 | 0.2             | 10.9     | 93.8  | 0.8      | 18.7     | 89.1  |
| 2003–2007 | 2.6             | 45.4     | 146.4 | 1.6      | 40.7     | 94.9  | 0.4             | 13.2     | 101.7 | 1.2      | 19.7     | 106.0 |
| 2008–2012 | 0.6             | 31.6     | 97.0  | 2.0      | 43.1     | 109.1 | 0.4             | 14.8     | 103.1 | 1.4      | 20.3     | 114.1 |
|           | 35–44           |          |       | >74 y/o  |          |       | 35–44           |          |       | >74 y/o  |          |       |
| 1983–1987 | 2.8             | 38.9     | 122.2 | 1.2      | 83.7     | 106.9 | 1.4             | 14.6     | 123.3 | 1.0      | 55.2     | 95.7  |
| 1988–1992 | 1.0             | 21.9     | 92.4  | 1.0      | 62.2     | 96.4  | 0.6             | 10.0     | 103.3 | 1.6      | 55.7     | 116.3 |
| 1993–1997 | 1.0             | 23.8     | 97.1  | 0.8      | 46.4     | 89.2  | 0.8             | 10.5     | 123.0 | 1.6      | 41.7     | 121.0 |
| 1998–2002 | 1.4             | 36.5     | 103.7 | 1.6      | 58.2     | 110.4 | 0.4             | 10.5     | 101.2 | 1.4      | 31.8     | 102.5 |
| 2003–2007 | 2.2             | 50.7     | 126.5 | 2.2      | 57.0     | 126.6 | 0.0             | 10.7     | 84.9  | 0.6      | 16.2     | 72.1  |
| 2008–2012 | 2.0             | 42.9     | 115.4 | 1.4      | 40.4     | 97.4  | 0.2             | 12.7     | 93.7  | 1.0      | 17.8     | 92.6  |

Secondary Medical Zone ID: 034

|           | Male            |                  |       |                 |                  |       | Female          |                  |       |                 |                  |       |
|-----------|-----------------|------------------|-------|-----------------|------------------|-------|-----------------|------------------|-------|-----------------|------------------|-------|
|           | Suicide         |                  |       | Suicide         |                  |       | Suicide         |                  |       | Suicide         |                  |       |
|           | Num<br>per year | Rate<br>/100,000 | × 100 | Num<br>per year | Rate<br>/100,000 | × 100 | Num<br>per year | Rate<br>/100,000 | × 100 | Num<br>per year | Rate<br>/100,000 | × 100 |
|           |                 |                  |       |                 |                  |       |                 |                  |       |                 |                  |       |
|           | Total (>10 y/o) |                  |       | 45–54           |                  |       | Total (>10 y/o) |                  |       | 45–54           |                  |       |
| 1983–1987 | 23.0            | 38.0             | 132.1 | 5.4             | 57.6             | 113.9 | 11.0            | 16.4             | 113.7 | 1.8             | 17.9             | 104.0 |
| 1988–1992 | 21.6            | 31.3             | 155.0 | 4.0             | 42.6             | 124.0 | 8.8             | 12.8             | 103.5 | 1.2             | 14.3             | 97.7  |
| 1993–1997 | 24.4            | 33.5             | 165.9 | 4.4             | 44.8             | 122.6 | 8.0             | 11.1             | 106.7 | 0.2             | 9.7              | 74.9  |
| 1998–2002 | 28.6            | 43.9             | 142.2 | 7.6             | 77.2             | 137.9 | 11.8            | 14.1             | 126.5 | 1.2             | 15.0             | 99.9  |
| 2003–2007 | 24.2            | 41.8             | 129.6 | 4.4             | 60.4             | 108.1 | 8.6             | 13.0             | 109.2 | 1.2             | 14.7             | 107.4 |
| 2008–2012 | 20.0            | 38.4             | 120.0 | 3.8             | 55.8             | 114.9 | 8.2             | 13.1             | 109.6 | 0.8             | 14.7             | 98.8  |
|           | 15–24           |                  |       | 55–64           |                  |       | 15–24           |                  |       | 55–64           |                  |       |
| 1983–1987 | 1.0             | 14.3             | 102.3 | 5.0             | 59.0             | 138.9 | 0.0             | 5.1              | 75.2  | 1.2             | 17.7             | 89.6  |
| 1988–1992 | 1.4             | 12.9             | 129.9 | 3.8             | 43.1             | 121.3 | 0.4             | 5.5              | 104.6 | 1.4             | 17.1             | 95.9  |
| 1993–1997 | 1.4             | 14.4             | 127.3 | 5.6             | 56.5             | 140.4 | 0.0             | 4.1              | 79.4  | 2.2             | 19.7             | 123.8 |
| 1998–2002 | 0.2             | 13.1             | 83.0  | 7.2             | 82.7             | 130.2 | 0.4             | 7.3              | 103.4 | 2.4             | 22.0             | 117.1 |
| 2003–2007 | 1.0             | 19.0             | 109.1 | 6.8             | 76.1             | 131.9 | 0.6             | 10.3             | 114.3 | 1.0             | 15.4             | 92.2  |
| 2008–2012 | 1.0             | 23.2             | 109.2 | 3.4             | 46.6             | 96.0  | 0.2             | 9.1              | 93.4  | 1.4             | 15.7             | 105.6 |
|           | 25–34           |                  |       | 65–74           |                  |       | 25–34           |                  |       | 65–74           |                  |       |
| 1983–1987 | 4.2             | 39.6             | 154.7 | 2.0             | 47.7             | 108.9 | 1.4             | 13.3             | 123.2 | 2.8             | 41.8             | 133.7 |
| 1988–1992 | 1.8             | 23.2             | 121.5 | 4.4             | 64.8             | 183.8 | 0.4             | 8.0              | 92.7  | 2.6             | 34.0             | 130.4 |
| 1993–1997 | 2.8             | 30.1             | 154.3 | 3.8             | 50.2             | 157.4 | 1.0             | 10.4             | 124.7 | 2.2             | 24.6             | 126.5 |
| 1998–2002 | 3.2             | 37.3             | 138.0 | 5.2             | 62.0             | 136.3 | 0.2             | 9.9              | 85.6  | 2.8             | 27.3             | 130.2 |
| 2003–2007 | 1.4             | 30.3             | 97.8  | 4.0             | 51.4             | 119.9 | 0.8             | 13.8             | 106.5 | 1.6             | 19.0             | 101.9 |
| 2008–2012 | 2.2             | 38.1             | 117.1 | 2.8             | 41.4             | 104.9 | 0.4             | 13.6             | 95.1  | 1.4             | 17.8             | 100.3 |
|           | 35–44           |                  |       | >74 y/o         |                  |       | 35–44           |                  |       | >74 y/o         |                  |       |
| 1983–1987 | 3.6             | 36.5             | 114.6 | 1.8             | 79.8             | 101.8 | 1.8             | 14.4             | 122.3 | 2.0             | 60.1             | 104.2 |
| 1988–1992 | 3.2             | 30.7             | 129.5 | 3.0             | 90.0             | 139.5 | 0.8             | 9.6              | 99.4  | 2.0             | 46.0             | 96.2  |
| 1993–1997 | 3.4             | 35.6             | 145.3 | 3.0             | 77.6             | 149.0 | 0.4             | 7.6              | 89.6  | 1.8             | 32.9             | 95.5  |
| 1998–2002 | 3.6             | 46.1             | 130.8 | 1.6             | 47.8             | 90.6  | 1.8             | 15.4             | 149.3 | 3.0             | 39.4             | 127.0 |
| 2003–2007 | 3.6             | 52.3             | 130.5 | 2.8             | 52.9             | 117.5 | 0.6             | 12.3             | 97.4  | 2.8             | 29.7             | 132.4 |
| 2008–2012 | 4.0             | 48.9             | 131.5 | 2.8             | 45.6             | 109.8 | 1.0             | 14.8             | 109.2 | 3.0             | 25.9             | 134.9 |

Secondary Medical Zone ID: 035

|                 | Male            |                  |       |                 |                  |       | Female          |                  |       |                 |                  |       |
|-----------------|-----------------|------------------|-------|-----------------|------------------|-------|-----------------|------------------|-------|-----------------|------------------|-------|
|                 | Suicide         |                  |       | Suicide         |                  |       | Suicide         |                  |       | Suicide         |                  |       |
|                 | Num<br>per year | Rate<br>/100,000 | × 100 | Num<br>per year | Rate<br>/100,000 | × 100 | Num<br>per year | Rate<br>/100,000 | × 100 | Num<br>per year | Rate<br>/100,000 | × 100 |
|                 |                 |                  |       |                 |                  |       |                 |                  |       |                 |                  |       |
| Total (>10 y/o) | 45–54           | Total (>10 y/o)  | 45–54 |                 |                  |       |                 |                  |       |                 |                  |       |
| 1983–1987       | 20.2            | 44.3             | 181.0 | 6.0             | 87.2             | 172.4 | 10.6            | 19.2             | 152.9 | 1.8             | 21.4             | 124.3 |
| 1988–1992       | 19.2            | 35.4             | 205.0 | 3.4             | 50.7             | 147.6 | 10.6            | 16.4             | 163.3 | 2.2             | 20.6             | 140.9 |
| 1993–1997       | 22.0            | 38.4             | 219.0 | 3.0             | 46.2             | 126.3 | 10.0            | 13.9             | 167.9 | 1.0             | 14.4             | 111.8 |
| 1998–2002       | 19.6            | 43.2             | 150.5 | 4.4             | 70.3             | 125.6 | 10.4            | 15.0             | 151.2 | 1.6             | 18.4             | 122.3 |
| 2003–2007       | 21.0            | 46.9             | 163.3 | 5.4             | 86.3             | 154.3 | 8.8             | 14.1             | 137.9 | 0.4             | 12.6             | 91.6  |
| 2008–2012       | 14.6            | 37.4             | 126.4 | 2.8             | 55.4             | 114.1 | 6.8             | 13.7             | 118.9 | 1.2             | 17.7             | 118.7 |
|                 | 15–24           |                  |       | 55–64           |                  |       | 15–24           |                  |       | 55–64           |                  |       |
| 1983–1987       | 1.0             | 16.0             | 114.7 | 4.6             | 73.7             | 173.4 | 0.4             | 7.1              | 104.2 | 1.4             | 22.8             | 115.7 |
| 1988–1992       | 0.6             | 10.5             | 106.0 | 4.6             | 64.0             | 180.2 | 0.0             | 4.4              | 82.5  | 1.8             | 22.5             | 125.9 |
| 1993–1997       | 0.8             | 12.7             | 112.0 | 6.4             | 80.3             | 199.4 | 0.2             | 5.2              | 98.9  | 2.4             | 24.8             | 156.0 |
| 1998–2002       | 0.6             | 15.9             | 100.9 | 5.4             | 93.2             | 146.7 | 0.2             | 6.8              | 97.3  | 1.4             | 21.0             | 111.8 |
| 2003–2007       | 0.4             | 16.7             | 95.9  | 3.8             | 70.9             | 122.8 | 0.6             | 10.8             | 120.4 | 1.6             | 20.1             | 119.8 |
| 2008–2012       | 1.0             | 24.5             | 115.3 | 1.4             | 42.0             | 86.5  | 0.0             | 8.2              | 84.8  | 0.8             | 15.1             | 101.3 |
|                 | 25–34           |                  |       | 65–74           |                  |       | 25–34           |                  |       | 65–74           |                  |       |
| 1983–1987       | 2.2             | 31.8             | 124.4 | 1.4             | 51.6             | 117.9 | 1.4             | 14.8             | 137.3 | 2.4             | 48.4             | 155.0 |
| 1988–1992       | 1.8             | 26.4             | 138.0 | 2.2             | 52.9             | 150.1 | 0.2             | 7.8              | 89.7  | 2.8             | 47.1             | 180.6 |
| 1993–1997       | 2.2             | 29.5             | 151.3 | 2.0             | 43.6             | 136.7 | 0.6             | 9.4              | 112.7 | 1.6             | 26.2             | 134.6 |
| 1998–2002       | 2.2             | 34.6             | 128.0 | 2.0             | 47.9             | 105.3 | 1.0             | 13.9             | 120.0 | 2.2             | 29.3             | 139.5 |
| 2003–2007       | 1.8             | 36.5             | 117.7 | 3.6             | 62.0             | 144.5 | 0.2             | 11.8             | 90.6  | 2.4             | 27.5             | 147.5 |
| 2008–2012       | 1.4             | 35.6             | 109.2 | 2.2             | 45.8             | 115.9 | 0.2             | 13.3             | 92.6  | 2.2             | 24.8             | 139.1 |
|                 | 35–44           |                  |       | >74 y/o         |                  |       | 35–44           |                  |       | >74 y/o         |                  |       |
| 1983–1987       | 2.2             | 37.2             | 116.8 | 2.6             | 132.8            | 169.5 | 0.8             | 12.6             | 107.1 | 2.4             | 94.7             | 164.1 |
| 1988–1992       | 3.0             | 36.0             | 151.9 | 3.4             | 132.2            | 205.0 | 0.2             | 8.5              | 87.9  | 3.4             | 95.8             | 200.1 |
| 1993–1997       | 5.2             | 57.1             | 233.0 | 2.4             | 89.9             | 172.6 | 1.0             | 11.0             | 129.6 | 3.2             | 71.6             | 207.9 |
| 1998–2002       | 2.2             | 41.1             | 116.7 | 2.8             | 86.4             | 164.0 | 0.6             | 11.0             | 106.2 | 3.4             | 61.6             | 198.4 |
| 2003–2007       | 3.6             | 62.0             | 154.8 | 2.4             | 63.1             | 140.2 | 0.6             | 13.0             | 103.3 | 3.0             | 43.1             | 192.2 |
| 2008–2012       | 1.6             | 38.6             | 103.8 | 4.2             | 75.0             | 180.8 | 0.6             | 14.0             | 103.1 | 1.6             | 22.7             | 118.2 |

Secondary Medical Zone ID: 036

|           | Male            |                  |       |                 |                  |       | Female          |                  |       |                 |                  |       |
|-----------|-----------------|------------------|-------|-----------------|------------------|-------|-----------------|------------------|-------|-----------------|------------------|-------|
|           | Suicide         |                  |       | Suicide         |                  |       | Suicide         |                  |       | Suicide         |                  |       |
|           | Num<br>per year | Rate<br>/100,000 | × 100 | Num<br>per year | Rate<br>/100,000 | × 100 | Num<br>per year | Rate<br>/100,000 | × 100 | Num<br>per year | Rate<br>/100,000 | × 100 |
|           |                 |                  |       |                 |                  |       |                 |                  |       |                 |                  |       |
|           | Total (>10 y/o) |                  |       | 45–54           |                  |       | Total (>10 y/o) |                  |       | 45–54           |                  |       |
| 1983–1987 | 20.8            | 43.1             | 168.4 | 5.8             | 80.7             | 159.5 | 13.8            | 21.0             | 173.5 | 1.0             | 16.9             | 98.3  |
| 1988–1992 | 17.8            | 33.1             | 181.1 | 4.0             | 55.4             | 161.4 | 14.2            | 17.9             | 192.3 | 1.0             | 15.5             | 105.8 |
| 1993–1997 | 15.8            | 30.8             | 157.4 | 3.2             | 46.6             | 127.5 | 12.6            | 15.0             | 191.0 | 1.0             | 14.4             | 111.4 |
| 1998–2002 | 22.4            | 44.5             | 158.7 | 5.8             | 79.5             | 142.0 | 11.2            | 14.6             | 154.6 | 0.2             | 12.8             | 84.9  |
| 2003–2007 | 18.8            | 41.4             | 145.9 | 5.0             | 81.0             | 144.9 | 9.4             | 14.1             | 142.3 | 0.6             | 13.5             | 98.6  |
| 2008–2012 | 18.0            | 38.8             | 145.0 | 2.4             | 52.6             | 108.2 | 7.4             | 13.4             | 123.9 | 0.2             | 13.1             | 87.6  |
|           | 15–24           |                  |       | 55–64           |                  |       | 15–24           |                  |       | 55–64           |                  |       |
| 1983–1987 | 1.0             | 16.5             | 118.0 | 4.0             | 60.3             | 141.9 | 0.6             | 8.1              | 118.8 | 2.6             | 28.3             | 143.2 |
| 1988–1992 | 0.8             | 11.7             | 117.7 | 3.6             | 50.8             | 143.0 | 0.4             | 6.1              | 115.1 | 2.6             | 25.5             | 142.7 |
| 1993–1997 | 0.4             | 11.3             | 100.2 | 3.4             | 52.0             | 129.2 | 0.4             | 6.1              | 116.7 | 2.2             | 22.9             | 144.1 |
| 1998–2002 | 0.4             | 15.2             | 96.2  | 4.6             | 81.8             | 128.7 | 0.0             | 6.2              | 87.6  | 2.2             | 24.4             | 129.4 |
| 2003–2007 | 0.4             | 17.0             | 97.6  | 3.0             | 61.6             | 106.7 | 0.0             | 7.7              | 85.3  | 1.0             | 17.5             | 104.7 |
| 2008–2012 | 0.4             | 20.8             | 98.2  | 4.4             | 61.7             | 127.0 | 0.6             | 12.2             | 125.4 | 0.6             | 14.4             | 96.5  |
|           | 25–34           |                  |       | 65–74           |                  |       | 25–34           |                  |       | 65–74           |                  |       |
| 1983–1987 | 2.0             | 30.1             | 117.8 | 3.0             | 68.5             | 156.6 | 1.0             | 13.0             | 121.1 | 4.0             | 63.0             | 201.6 |
| 1988–1992 | 0.6             | 17.5             | 91.3  | 3.0             | 57.1             | 162.1 | 1.2             | 12.5             | 143.6 | 2.0             | 34.8             | 133.5 |
| 1993–1997 | 1.8             | 27.2             | 139.4 | 2.4             | 43.7             | 137.1 | 0.0             | 7.1              | 84.7  | 2.4             | 30.6             | 157.0 |
| 1998–2002 | 2.2             | 35.5             | 131.4 | 5.0             | 71.5             | 157.3 | 0.2             | 10.8             | 93.2  | 3.2             | 34.4             | 163.9 |
| 2003–2007 | 1.0             | 31.3             | 101.0 | 4.4             | 67.6             | 157.5 | 0.4             | 13.1             | 100.8 | 2.4             | 26.7             | 143.4 |
| 2008–2012 | 1.6             | 37.4             | 114.9 | 2.6             | 48.7             | 123.2 | 0.2             | 13.6             | 94.7  | 1.4             | 20.5             | 115.0 |
|           | 35–44           |                  |       | >74 y/o         |                  |       | 35–44           |                  |       | >74 y/o         |                  |       |
| 1983–1987 | 2.8             | 41.2             | 129.3 | 2.2             | 110.8            | 141.5 | 1.0             | 13.5             | 113.9 | 3.6             | 115.2            | 199.6 |
| 1988–1992 | 3.0             | 35.9             | 151.4 | 2.8             | 106.4            | 165.0 | 1.6             | 13.7             | 141.7 | 5.4             | 128.1            | 267.8 |
| 1993–1997 | 1.6             | 27.3             | 111.4 | 3.0             | 94.1             | 180.8 | 0.8             | 10.3             | 120.8 | 5.8             | 108.0            | 313.7 |
| 1998–2002 | 2.4             | 43.1             | 122.3 | 2.0             | 64.1             | 121.5 | 0.2             | 9.3              | 90.0  | 5.2             | 79.3             | 255.2 |
| 2003–2007 | 0.8             | 32.2             | 80.3  | 4.2             | 83.0             | 184.4 | 0.6             | 13.3             | 105.6 | 4.2             | 51.4             | 229.2 |
| 2008–2012 | 1.8             | 40.8             | 109.7 | 4.8             | 77.1             | 185.8 | 0.0             | 11.7             | 86.5  | 4.4             | 41.5             | 215.9 |

Secondary Medical Zone ID: 037

|           | Male            |                  |       |                 |                  |       | Female          |                  |       |                 |                  |       |
|-----------|-----------------|------------------|-------|-----------------|------------------|-------|-----------------|------------------|-------|-----------------|------------------|-------|
|           | Suicide         |                  |       | Suicide         |                  |       | Suicide         |                  |       | Suicide         |                  |       |
|           | Num<br>per year | Rate<br>/100,000 | × 100 | Num<br>per year | Rate<br>/100,000 | × 100 | Num<br>per year | Rate<br>/100,000 | × 100 | Num<br>per year | Rate<br>/100,000 | × 100 |
|           |                 |                  |       |                 |                  |       |                 |                  |       |                 |                  |       |
|           | Total (>10 y/o) |                  |       | 45–54           |                  |       | Total (>10 y/o) |                  |       | 45–54           |                  |       |
| 1983–1987 | 26.0            | 32.2             | 98.4  | 5.8             | 49.5             | 97.9  | 17.4            | 16.8             | 115.5 | 3.4             | 21.8             | 126.5 |
| 1988–1992 | 21.0            | 24.2             | 98.6  | 4.0             | 33.9             | 98.8  | 15.0            | 13.6             | 109.6 | 2.0             | 15.5             | 106.3 |
| 1993–1997 | 20.6            | 23.5             | 91.7  | 5.2             | 37.0             | 101.2 | 12.8            | 10.8             | 106.0 | 1.8             | 13.4             | 103.5 |
| 1998–2002 | 38.2            | 38.5             | 111.6 | 9.8             | 61.6             | 110.0 | 13.6            | 12.2             | 98.3  | 1.6             | 13.4             | 89.1  |
| 2003–2007 | 39.6            | 41.9             | 114.9 | 10.2            | 69.5             | 124.3 | 13.8            | 12.6             | 103.3 | 2.6             | 16.1             | 117.5 |
| 2008–2012 | 37.2            | 38.5             | 116.4 | 8.2             | 62.8             | 129.2 | 14.4            | 13.9             | 108.4 | 1.8             | 15.4             | 103.3 |
|           | 15–24           |                  |       | 55–64           |                  |       | 15–24           |                  |       | 55–64           |                  |       |
| 1983–1987 | 2.0             | 15.6             | 111.8 | 4.0             | 37.7             | 88.7  | 0.6             | 6.3              | 92.2  | 2.4             | 19.0             | 96.1  |
| 1988–1992 | 0.6             | 7.9              | 79.4  | 4.0             | 34.1             | 96.1  | 0.4             | 4.6              | 86.7  | 1.8             | 15.6             | 87.6  |
| 1993–1997 | 2.0             | 12.6             | 111.1 | 3.6             | 34.8             | 86.5  | 1.0             | 6.2              | 118.8 | 3.0             | 19.9             | 125.4 |
| 1998–2002 | 1.8             | 14.7             | 93.3  | 5.8             | 54.3             | 85.4  | 1.0             | 7.5              | 106.1 | 1.8             | 17.4             | 92.4  |
| 2003–2007 | 2.4             | 18.7             | 107.1 | 6.2             | 49.2             | 85.3  | 0.8             | 8.3              | 92.7  | 1.8             | 15.6             | 93.4  |
| 2008–2012 | 2.8             | 24.5             | 115.4 | 8.4             | 52.8             | 108.7 | 1.4             | 12.2             | 125.5 | 1.6             | 13.3             | 89.2  |
|           | 25–34           |                  |       | 65–74           |                  |       | 25–34           |                  |       | 65–74           |                  |       |
| 1983–1987 | 3.4             | 24.7             | 96.8  | 1.8             | 33.9             | 77.5  | 1.2             | 9.9              | 92.3  | 3.0             | 33.5             | 107.3 |
| 1988–1992 | 1.8             | 16.8             | 88.0  | 2.4             | 31.9             | 90.5  | 2.0             | 12.1             | 139.9 | 3.6             | 31.5             | 120.9 |
| 1993–1997 | 1.8             | 18.2             | 93.1  | 3.4             | 33.5             | 104.9 | 0.2             | 6.2              | 74.0  | 2.6             | 20.6             | 105.5 |
| 1998–2002 | 6.0             | 40.0             | 148.3 | 5.2             | 47.6             | 104.6 | 1.4             | 12.2             | 105.4 | 2.8             | 21.5             | 102.3 |
| 2003–2007 | 4.6             | 35.8             | 115.6 | 4.8             | 44.8             | 104.5 | 0.8             | 11.0             | 84.3  | 2.4             | 19.2             | 103.3 |
| 2008–2012 | 2.8             | 29.9             | 91.7  | 4.8             | 43.0             | 108.9 | 2.4             | 18.1             | 126.1 | 1.6             | 16.4             | 92.2  |
|           | 35–44           |                  |       | >74 y/o         |                  |       | 35–44           |                  |       | >74 y/o         |                  |       |
| 1983–1987 | 6.4             | 40.6             | 127.5 | 2.4             | 67.4             | 86.0  | 2.2             | 14.1             | 119.1 | 4.4             | 72.9             | 126.3 |
| 1988–1992 | 4.4             | 27.0             | 113.8 | 3.6             | 73.0             | 113.2 | 1.8             | 10.9             | 112.6 | 3.4             | 46.9             | 97.9  |
| 1993–1997 | 2.0             | 17.7             | 72.2  | 2.6             | 48.8             | 93.6  | 0.2             | 5.4              | 64.1  | 4.0             | 41.7             | 121.1 |
| 1998–2002 | 4.8             | 38.6             | 109.5 | 4.4             | 60.2             | 114.1 | 0.8             | 9.0              | 86.9  | 4.2             | 34.9             | 112.3 |
| 2003–2007 | 8.0             | 64.9             | 161.9 | 3.4             | 40.5             | 89.9  | 1.2             | 12.4             | 97.9  | 4.2             | 27.3             | 121.6 |
| 2008–2012 | 6.0             | 46.6             | 125.4 | 4.2             | 41.3             | 99.5  | 1.6             | 14.4             | 105.9 | 4.0             | 22.5             | 117.0 |

Secondary Medical Zone ID: 038

|                 | Male            |                  |       |                 |                  |       | Female          |                  |       |                 |                  |       |
|-----------------|-----------------|------------------|-------|-----------------|------------------|-------|-----------------|------------------|-------|-----------------|------------------|-------|
|                 | Suicide         |                  |       | Suicide         |                  |       | Suicide         |                  |       | Suicide         |                  |       |
|                 | Num<br>per year | Rate<br>/100,000 | × 100 | Num<br>per year | Rate<br>/100,000 | × 100 | Num<br>per year | Rate<br>/100,000 | × 100 | Num<br>per year | Rate<br>/100,000 | × 100 |
|                 |                 |                  |       |                 |                  |       |                 |                  |       |                 |                  |       |
| Total (>10 y/o) | 45–54           | Total (>10 y/o)  | 45–54 |                 |                  |       |                 |                  |       |                 |                  |       |
| 1983–1987       | 133.8           | 29.5             | 90.5  | 33.0            | 45.9             | 90.7  | 66.6            | 13.9             | 89.8  | 10.8            | 14.8             | 85.6  |
| 1988–1992       | 110.4           | 21.6             | 87.4  | 24.2            | 29.9             | 87.0  | 59.0            | 10.6             | 81.7  | 11.4            | 13.9             | 94.8  |
| 1993–1997       | 131.2           | 22.4             | 89.1  | 31.4            | 32.5             | 88.7  | 63.6            | 9.8              | 90.2  | 13.6            | 13.7             | 106.3 |
| 1998–2002       | 212.2           | 33.1             | 91.8  | 55.0            | 52.8             | 94.4  | 82.8            | 11.6             | 91.4  | 12.8            | 12.6             | 83.8  |
| 2003–2007       | 248.0           | 37.4             | 101.4 | 53.2            | 55.1             | 98.5  | 90.4            | 12.3             | 96.4  | 15.2            | 15.1             | 110.2 |
| 2008–2012       | 221.6           | 33.4             | 94.9  | 43.2            | 47.8             | 98.3  | 84.6            | 11.9             | 87.5  | 12.4            | 13.5             | 90.8  |
|                 | 15–24           |                  |       | 55–64           |                  |       | 15–24           |                  |       | 55–64           |                  |       |
| 1983–1987       | 16.4            | 16.4             | 117.9 | 16.0            | 32.5             | 76.4  | 8.0             | 8.4              | 122.4 | 8.6             | 15.6             | 79.1  |
| 1988–1992       | 11.8            | 10.1             | 102.0 | 16.4            | 26.9             | 75.7  | 3.8             | 3.8              | 72.7  | 12.0            | 17.6             | 98.5  |
| 1993–1997       | 16.6            | 13.0             | 114.6 | 26.0            | 37.1             | 92.1  | 7.2             | 6.0              | 115.9 | 10.2            | 13.8             | 86.8  |
| 1998–2002       | 20.8            | 17.7             | 111.9 | 43.8            | 55.7             | 87.6  | 6.8             | 6.4              | 90.5  | 13.4            | 16.6             | 88.0  |
| 2003–2007       | 20.4            | 19.9             | 114.0 | 50.6            | 54.9             | 95.1  | 11.0            | 11.1             | 123.3 | 15.4            | 16.1             | 96.3  |
| 2008–2012       | 18.2            | 21.0             | 99.0  | 45.0            | 45.4             | 93.5  | 8.6             | 10.1             | 104.3 | 12.4            | 12.3             | 82.6  |
|                 | 25–34           |                  |       | 65–74           |                  |       | 25–34           |                  |       | 65–74           |                  |       |
| 1983–1987       | 20.8            | 23.0             | 90.1  | 10.0            | 38.8             | 88.7  | 9.2             | 9.9              | 92.2  | 9.0             | 26.7             | 85.5  |
| 1988–1992       | 17.0            | 19.1             | 99.8  | 9.0             | 27.6             | 78.3  | 5.0             | 6.0              | 69.3  | 7.2             | 17.2             | 66.1  |
| 1993–1997       | 19.0            | 19.4             | 99.5  | 8.4             | 19.8             | 62.0  | 5.8             | 6.3              | 76.0  | 8.0             | 14.9             | 76.4  |
| 1998–2002       | 30.0            | 27.3             | 101.0 | 22.4            | 40.5             | 89.0  | 14.0            | 12.6             | 108.9 | 14.4            | 21.7             | 103.5 |
| 2003–2007       | 41.8            | 37.4             | 120.7 | 27.2            | 43.1             | 100.4 | 12.6            | 11.6             | 89.0  | 10.6            | 15.1             | 81.2  |
| 2008–2012       | 35.0            | 35.5             | 108.8 | 25.2            | 36.3             | 91.8  | 16.0            | 15.5             | 107.9 | 10.4            | 14.0             | 78.4  |
|                 | 35–44           |                  |       | >74 y/o         |                  |       | 35–44           |                  |       | >74 y/o         |                  |       |
| 1983–1987       | 29.8            | 31.0             | 97.5  | 7.8             | 63.6             | 81.2  | 9.0             | 9.7              | 81.8  | 11.8            | 60.6             | 105.1 |
| 1988–1992       | 22.8            | 22.4             | 94.3  | 8.8             | 53.0             | 82.2  | 7.8             | 7.9              | 81.6  | 11.6            | 42.1             | 88.0  |
| 1993–1997       | 20.6            | 21.2             | 86.7  | 9.2             | 43.3             | 83.2  | 6.2             | 6.6              | 77.6  | 12.4            | 33.9             | 98.4  |
| 1998–2002       | 29.0            | 30.9             | 87.8  | 11.0            | 39.1             | 74.2  | 9.2             | 9.8              | 94.4  | 12.2            | 24.9             | 80.2  |
| 2003–2007       | 42.4            | 43.0             | 107.2 | 12.0            | 31.0             | 68.9  | 10.8            | 11.2             | 88.7  | 14.2            | 21.5             | 95.9  |
| 2008–2012       | 41.8            | 38.2             | 102.7 | 13.0            | 26.7             | 64.3  | 13.0            | 12.2             | 89.8  | 11.6            | 14.3             | 74.5  |

Secondary Medical Zone ID: 039

|           | Male            |          |       |          |          |       | Female          |          |       |          |          |       |
|-----------|-----------------|----------|-------|----------|----------|-------|-----------------|----------|-------|----------|----------|-------|
|           | Suicide         |          |       | Suicide  |          |       | Suicide         |          |       | Suicide  |          |       |
|           | Num             | Rate     | × 100 | Num      | Rate     | × 100 | Num             | Rate     | × 100 | Num      | Rate     | × 100 |
|           | per year        | /100,000 |       | per year | /100,000 |       | per year        | /100,000 |       | per year | /100,000 |       |
|           | Total (>10 y/o) |          |       | 45–54    |          |       | Total (>10 y/o) |          |       | 45–54    |          |       |
| 1983–1987 | 47.4            | 34.5     | 108.9 | 11.6     | 54.6     | 107.9 | 26.0            | 15.9     | 105.0 | 4.0      | 16.9     | 98.2  |
| 1988–1992 | 35.0            | 25.2     | 101.9 | 7.0      | 36.7     | 106.9 | 21.8            | 12.5     | 97.9  | 2.2      | 12.8     | 87.6  |
| 1993–1997 | 42.4            | 27.8     | 115.2 | 9.8      | 43.3     | 118.3 | 21.6            | 11.4     | 108.7 | 1.6      | 10.4     | 80.3  |
| 1998–2002 | 62.2            | 40.4     | 115.9 | 17.4     | 67.9     | 121.3 | 23.6            | 12.6     | 103.1 | 4.4      | 17.3     | 115.1 |
| 2003–2007 | 73.4            | 47.4     | 136.1 | 20.6     | 85.1     | 152.1 | 21.6            | 11.8     | 101.5 | 2.0      | 11.2     | 81.9  |
| 2008–2012 | 64.4            | 41.8     | 130.3 | 11.0     | 56.0     | 115.3 | 20.0            | 13.4     | 99.4  | 3.2      | 16.4     | 109.9 |
|           | 15–24           |          |       | 55–64    |          |       | 15–24           |          |       | 55–64    |          |       |
| 1983–1987 | 2.6             | 14.9     | 106.8 | 7.8      | 40.0     | 94.1  | 2.8             | 11.3     | 165.2 | 4.0      | 18.3     | 92.7  |
| 1988–1992 | 2.6             | 12.3     | 124.4 | 6.0      | 29.7     | 83.6  | 0.4             | 4.0      | 76.0  | 3.4      | 15.2     | 85.2  |
| 1993–1997 | 2.2             | 11.6     | 102.6 | 8.6      | 42.8     | 106.3 | 0.6             | 4.4      | 84.1  | 4.6      | 18.5     | 116.6 |
| 1998–2002 | 4.6             | 20.9     | 132.4 | 13.6     | 73.1     | 115.1 | 1.2             | 7.0      | 99.6  | 4.0      | 19.6     | 104.1 |
| 2003–2007 | 3.8             | 20.9     | 119.8 | 15.2     | 71.2     | 123.4 | 1.6             | 9.9      | 109.9 | 2.8      | 15.4     | 91.9  |
| 2008–2012 | 3.0             | 22.7     | 107.1 | 15.4     | 59.7     | 122.9 | 2.6             | 15.4     | 158.7 | 2.4      | 12.6     | 84.5  |
|           | 25–34           |          |       | 65–74    |          |       | 25–34           |          |       | 65–74    |          |       |
| 1983–1987 | 7.4             | 30.2     | 118.0 | 7.2      | 59.8     | 136.5 | 1.6             | 8.6      | 80.0  | 3.8      | 27.0     | 86.5  |
| 1988–1992 | 3.6             | 19.1     | 100.0 | 5.2      | 38.1     | 108.1 | 1.6             | 8.7      | 100.7 | 3.4      | 21.1     | 81.1  |
| 1993–1997 | 3.8             | 21.9     | 111.9 | 6.6      | 37.7     | 118.0 | 1.8             | 9.8      | 117.3 | 4.6      | 21.3     | 109.1 |
| 1998–2002 | 5.6             | 31.3     | 116.0 | 8.6      | 46.0     | 101.2 | 1.6             | 11.1     | 95.8  | 4.0      | 18.3     | 87.0  |
| 2003–2007 | 9.0             | 45.0     | 145.0 | 7.2      | 41.8     | 97.4  | 1.0             | 9.8      | 75.6  | 5.4      | 22.6     | 121.4 |
| 2008–2012 | 10.2            | 49.8     | 152.9 | 7.6      | 45.9     | 116.2 | 1.2             | 11.5     | 80.2  | 2.0      | 14.1     | 79.3  |
|           | 35–44           |          |       | >74 y/o  |          |       | 35–44           |          |       | >74 y/o  |          |       |
| 1983–1987 | 8.4             | 37.3     | 117.2 | 2.2      | 49.5     | 63.2  | 2.6             | 12.4     | 105.3 | 7.2      | 74.8     | 129.7 |
| 1988–1992 | 6.2             | 24.7     | 104.1 | 4.2      | 61.1     | 94.7  | 3.2             | 11.9     | 122.7 | 7.6      | 60.4     | 126.2 |
| 1993–1997 | 7.0             | 28.7     | 116.9 | 4.0      | 48.3     | 92.8  | 2.2             | 9.3      | 109.3 | 6.0      | 39.3     | 114.3 |
| 1998–2002 | 7.8             | 39.0     | 110.7 | 4.6      | 45.2     | 85.8  | 1.4             | 8.9      | 85.7  | 7.0      | 36.2     | 116.7 |
| 2003–2007 | 10.2            | 57.1     | 142.4 | 7.0      | 49.1     | 109.0 | 1.2             | 10.3     | 81.9  | 7.6      | 30.1     | 134.1 |
| 2008–2012 | 8.2             | 45.7     | 122.8 | 8.8      | 50.5     | 121.8 | 2.4             | 14.6     | 107.9 | 6.2      | 21.2     | 110.2 |



Secondary Medical Zone ID: 040

|           | Male            |                  |       |                 |                  |       | Female          |                  |       |                 |                  |       |
|-----------|-----------------|------------------|-------|-----------------|------------------|-------|-----------------|------------------|-------|-----------------|------------------|-------|
|           | Suicide         |                  |       | Suicide         |                  |       | Suicide         |                  |       | Suicide         |                  |       |
|           | Num<br>per year | Rate<br>/100,000 | × 100 | Num<br>per year | Rate<br>/100,000 | × 100 | Num<br>per year | Rate<br>/100,000 | × 100 | Num<br>per year | Rate<br>/100,000 | × 100 |
|           |                 |                  |       |                 |                  |       |                 |                  |       |                 |                  |       |
|           | Total (>10 y/o) |                  |       | 45–54           |                  |       | Total (>10 y/o) |                  |       | 45–54           |                  |       |
| 1983–1987 | 62.8            | 33.7             | 103.6 | 14.6            | 47.7             | 94.4  | 33.0            | 15.1             | 99.0  | 5.0             | 15.8             | 91.9  |
| 1988–1992 | 52.2            | 26.6             | 108.5 | 10.4            | 35.0             | 102.0 | 34.2            | 13.5             | 110.9 | 5.0             | 15.7             | 107.4 |
| 1993–1997 | 52.2            | 25.8             | 102.8 | 11.8            | 37.1             | 101.5 | 29.8            | 11.3             | 109.8 | 4.6             | 14.2             | 109.6 |
| 1998–2002 | 84.8            | 40.3             | 114.4 | 20.6            | 61.6             | 110.1 | 35.4            | 13.0             | 111.7 | 4.8             | 15.1             | 100.5 |
| 2003–2007 | 97.4            | 48.1             | 134.0 | 25.8            | 84.3             | 150.8 | 30.4            | 12.7             | 104.7 | 4.6             | 15.1             | 110.0 |
| 2008–2012 | 66.8            | 35.5             | 103.6 | 14.2            | 55.2             | 113.6 | 26.2            | 13.0             | 96.5  | 3.6             | 14.7             | 98.3  |
|           | 15–24           |                  |       | 55–64           |                  |       | 15–24           |                  |       | 55–64           |                  |       |
| 1983–1987 | 5.4             | 18.7             | 134.3 | 11.0            | 43.0             | 101.3 | 1.6             | 6.4              | 93.3  | 6.0             | 20.1             | 101.6 |
| 1988–1992 | 3.6             | 12.1             | 121.8 | 9.4             | 33.2             | 93.4  | 2.6             | 7.9              | 150.7 | 6.2             | 19.0             | 106.3 |
| 1993–1997 | 2.2             | 9.6              | 84.9  | 11.6            | 40.5             | 100.7 | 2.0             | 6.8              | 129.5 | 4.8             | 15.5             | 97.3  |
| 1998–2002 | 3.6             | 15.3             | 96.7  | 16.0            | 58.9             | 92.7  | 1.2             | 6.1              | 87.4  | 4.0             | 15.5             | 82.3  |
| 2003–2007 | 4.0             | 18.7             | 107.2 | 20.2            | 66.9             | 115.9 | 1.8             | 9.3              | 102.9 | 3.8             | 14.3             | 85.6  |
| 2008–2012 | 3.0             | 19.3             | 90.9  | 16.0            | 50.4             | 103.7 | 2.2             | 12.1             | 124.6 | 4.0             | 13.7             | 91.9  |
|           | 25–34           |                  |       | 65–74           |                  |       | 25–34           |                  |       | 65–74           |                  |       |
| 1983–1987 | 8.0             | 25.5             | 99.7  | 7.4             | 50.7             | 115.7 | 3.6             | 11.3             | 105.3 | 6.2             | 31.6             | 101.0 |
| 1988–1992 | 7.8             | 26.8             | 140.3 | 5.0             | 30.8             | 87.4  | 1.2             | 6.2              | 71.2  | 6.4             | 27.4             | 105.0 |
| 1993–1997 | 7.2             | 26.7             | 136.9 | 6.8             | 31.6             | 99.1  | 1.8             | 7.9              | 94.7  | 4.8             | 18.0             | 92.2  |
| 1998–2002 | 9.2             | 35.0             | 129.7 | 13.0            | 51.3             | 112.7 | 2.6             | 11.5             | 99.1  | 5.8             | 19.8             | 94.4  |
| 2003–2007 | 11.8            | 45.8             | 147.6 | 12.0            | 47.5             | 110.8 | 1.8             | 10.4             | 80.3  | 7.2             | 22.8             | 122.5 |
| 2008–2012 | 7.4             | 34.9             | 107.0 | 8.2             | 35.9             | 90.9  | 2.8             | 14.5             | 101.3 | 4.2             | 16.2             | 91.2  |
|           | 35–44           |                  |       | >74 y/o         |                  |       | 35–44           |                  |       | >74 y/o         |                  |       |
| 1983–1987 | 10.4            | 31.7             | 99.6  | 5.6             | 76.7             | 98.0  | 4.0             | 12.3             | 104.2 | 6.6             | 56.5             | 98.0  |
| 1988–1992 | 11.4            | 31.5             | 132.8 | 4.4             | 52.2             | 80.9  | 2.8             | 9.0              | 93.2  | 10.0            | 62.6             | 130.9 |
| 1993–1997 | 7.4             | 24.1             | 98.5  | 5.0             | 47.6             | 91.4  | 1.8             | 6.9              | 81.6  | 9.8             | 48.4             | 140.6 |
| 1998–2002 | 14.2            | 50.2             | 142.5 | 8.2             | 58.9             | 111.7 | 3.2             | 11.5             | 111.7 | 13.6            | 52.0             | 167.6 |
| 2003–2007 | 16.0            | 63.6             | 158.8 | 7.6             | 43.6             | 96.8  | 3.2             | 13.3             | 105.6 | 8.0             | 25.4             | 113.3 |
| 2008–2012 | 8.8             | 38.5             | 103.4 | 9.0             | 42.5             | 102.3 | 2.6             | 12.7             | 93.9  | 6.8             | 18.8             | 97.6  |

Secondary Medical Zone ID: 041

|           | Male            |                  |       |                 |                  |       | Female          |                  |       |                 |                  |       |
|-----------|-----------------|------------------|-------|-----------------|------------------|-------|-----------------|------------------|-------|-----------------|------------------|-------|
|           | Suicide         |                  |       | Suicide         |                  |       | Suicide         |                  |       | Suicide         |                  |       |
|           | Num<br>per year | Rate<br>/100,000 | × 100 | Num<br>per year | Rate<br>/100,000 | × 100 | Num<br>per year | Rate<br>/100,000 | × 100 | Num<br>per year | Rate<br>/100,000 | × 100 |
|           |                 |                  |       |                 |                  |       |                 |                  |       |                 |                  |       |
|           | Total (>10 y/o) |                  |       | 45–54           |                  |       | Total (>10 y/o) |                  |       | 45–54           |                  |       |
| 1983–1987 | 30.0            | 40.4             | 141.4 | 10.8            | 85.1             | 168.3 | 14.0            | 16.5             | 113.8 | 2.8             | 19.7             | 114.2 |
| 1988–1992 | 23.6            | 30.2             | 142.2 | 3.8             | 38.4             | 111.7 | 14.8            | 14.6             | 127.5 | 2.6             | 17.8             | 121.8 |
| 1993–1997 | 22.6            | 29.2             | 131.9 | 6.4             | 52.0             | 142.0 | 11.2            | 11.5             | 113.6 | 2.6             | 17.1             | 132.1 |
| 1998–2002 | 39.8            | 47.7             | 159.6 | 9.2             | 78.3             | 140.0 | 12.8            | 13.2             | 113.1 | 1.8             | 15.9             | 105.9 |
| 2003–2007 | 36.4            | 50.0             | 154.7 | 7.6             | 77.0             | 137.6 | 18.4            | 16.2             | 156.1 | 2.8             | 19.5             | 142.2 |
| 2008–2012 | 23.2            | 36.9             | 113.7 | 3.4             | 46.7             | 96.1  | 11.2            | 12.8             | 112.9 | 0.6             | 12.7             | 84.9  |
|           | 15–24           |                  |       | 55–64           |                  |       | 15–24           |                  |       | 55–64           |                  |       |
| 1983–1987 | 0.6             | 11.6             | 83.5  | 6.0             | 56.7             | 133.4 | 0.6             | 7.1              | 103.8 | 2.6             | 21.8             | 110.4 |
| 1988–1992 | 0.6             | 9.7              | 98.0  | 5.6             | 47.6             | 134.1 | 0.8             | 6.8              | 129.2 | 3.4             | 22.9             | 128.4 |
| 1993–1997 | 0.4             | 9.9              | 87.6  | 4.6             | 44.4             | 110.3 | 0.2             | 4.7              | 90.4  | 2.4             | 18.1             | 113.6 |
| 1998–2002 | 1.4             | 17.8             | 112.8 | 9.0             | 88.1             | 138.6 | 0.2             | 6.2              | 88.9  | 3.2             | 22.9             | 121.9 |
| 2003–2007 | 1.0             | 18.1             | 104.0 | 7.4             | 72.3             | 125.2 | 0.6             | 9.9              | 109.6 | 3.6             | 23.0             | 137.4 |
| 2008–2012 | 1.6             | 25.4             | 119.7 | 6.2             | 56.4             | 116.1 | 0.2             | 8.6              | 89.0  | 1.6             | 15.2             | 101.9 |
|           | 25–34           |                  |       | 65–74           |                  |       | 25–34           |                  |       | 65–74           |                  |       |
| 1983–1987 | 2.8             | 27.9             | 109.3 | 2.6             | 46.7             | 106.7 | 0.8             | 9.8              | 91.5  | 1.8             | 27.8             | 88.9  |
| 1988–1992 | 3.2             | 30.3             | 158.5 | 4.0             | 50.9             | 144.6 | 0.4             | 7.6              | 87.5  | 2.8             | 30.0             | 115.1 |
| 1993–1997 | 2.0             | 23.6             | 120.7 | 4.4             | 46.9             | 147.1 | 0.2             | 6.9              | 83.3  | 1.8             | 18.5             | 94.9  |
| 1998–2002 | 3.6             | 37.1             | 137.4 | 6.6             | 62.4             | 137.1 | 0.8             | 11.8             | 102.0 | 3.4             | 26.3             | 125.1 |
| 2003–2007 | 4.4             | 46.3             | 149.3 | 5.4             | 55.1             | 128.4 | 1.2             | 14.8             | 114.0 | 4.0             | 27.1             | 145.4 |
| 2008–2012 | 2.8             | 38.0             | 116.8 | 3.0             | 39.7             | 100.5 | 0.6             | 13.7             | 95.5  | 3.2             | 23.2             | 130.4 |
|           | 35–44           |                  |       | >74 y/o         |                  |       | 35–44           |                  |       | >74 y/o         |                  |       |
| 1983–1987 | 5.0             | 41.3             | 129.8 | 2.0             | 81.8             | 104.5 | 1.4             | 12.1             | 102.6 | 4.0             | 86.2             | 149.4 |
| 1988–1992 | 3.2             | 27.7             | 116.9 | 3.0             | 82.1             | 127.3 | 0.6             | 8.4              | 86.8  | 4.2             | 67.2             | 140.5 |
| 1993–1997 | 3.2             | 30.5             | 124.4 | 1.6             | 45.1             | 86.6  | 0.8             | 8.6              | 101.0 | 3.2             | 41.6             | 121.0 |
| 1998–2002 | 5.6             | 55.0             | 156.2 | 4.4             | 76.4             | 144.9 | 0.6             | 9.5              | 91.8  | 2.8             | 30.7             | 98.9  |
| 2003–2007 | 8.0             | 83.7             | 209.0 | 2.6             | 43.6             | 96.8  | 2.0             | 17.1             | 135.5 | 4.2             | 33.1             | 147.6 |
| 2008–2012 | 2.6             | 38.1             | 102.4 | 3.6             | 45.9             | 110.7 | 0.4             | 11.9             | 87.5  | 4.6             | 29.0             | 151.0 |

Secondary Medical Zone ID: 042

|           | Male            |          |       |          |          |       | Female          |          |       |          |          |       |
|-----------|-----------------|----------|-------|----------|----------|-------|-----------------|----------|-------|----------|----------|-------|
|           | Suicide         |          |       | Suicide  |          |       | Suicide         |          |       | Suicide  |          |       |
|           | Num             | Rate     | × 100 | Num      | Rate     | × 100 | Num             | Rate     | × 100 | Num      | Rate     | × 100 |
|           | per year        | /100,000 |       | per year | /100,000 |       | per year        | /100,000 |       | per year | /100,000 |       |
|           | Total (>10 y/o) |          |       | 45–54    |          |       | Total (>10 y/o) |          |       | 45–54    |          |       |
| 1983–1987 | 14.8            | 40.3     | 162.2 | 2.8      | 59.9     | 118.4 | 8.4             | 18.3     | 144.2 | 1.2      | 19.4     | 112.6 |
| 1988–1992 | 10.6            | 29.6     | 148.5 | 3.2      | 54.3     | 158.0 | 6.6             | 14.4     | 131.2 | 1.2      | 17.3     | 118.5 |
| 1993–1997 | 11.0            | 29.6     | 148.3 | 2.0      | 42.3     | 115.7 | 6.6             | 12.6     | 142.6 | 1.8      | 18.8     | 145.5 |
| 1998–2002 | 14.2            | 41.4     | 143.2 | 3.6      | 72.4     | 129.3 | 5.8             | 13.4     | 121.6 | 0.2      | 13.7     | 90.7  |
| 2003–2007 | 12.6            | 42.0     | 139.2 | 3.6      | 81.4     | 145.5 | 4.6             | 13.1     | 113.2 | 0.4      | 13.6     | 99.5  |
| 2008–2012 | 8.4             | 35.8     | 112.5 | 1.6      | 52.3     | 107.6 | 5.6             | 13.7     | 123.6 | 0.6      | 16.2     | 108.3 |
|           | 15–24           |          |       | 55–64    |          |       | 15–24           |          |       | 55–64    |          |       |
| 1983–1987 | 0.6             | 15.9     | 114.1 | 3.8      | 65.7     | 154.6 | 0.6             | 8.7      | 127.5 | 1.4      | 23.3     | 118.1 |
| 1988–1992 | 0.6             | 11.5     | 116.6 | 2.4      | 45.2     | 127.4 | 0.4             | 6.5      | 123.8 | 0.8      | 17.7     | 99.3  |
| 1993–1997 | 0.2             | 11.1     | 98.3  | 2.8      | 52.6     | 130.8 | 0.0             | 4.8      | 91.9  | 1.2      | 19.0     | 119.4 |
| 1998–2002 | 0.2             | 15.3     | 96.7  | 3.8      | 83.9     | 132.1 | 0.2             | 7.4      | 105.0 | 1.2      | 21.2     | 112.6 |
| 2003–2007 | 0.4             | 18.2     | 104.3 | 2.8      | 67.8     | 117.4 | 0.0             | 8.3      | 91.8  | 0.6      | 16.8     | 100.4 |
| 2008–2012 | 0.6             | 23.6     | 111.4 | 2.8      | 57.7     | 118.8 | 0.2             | 10.4     | 106.8 | 0.4      | 14.5     | 96.9  |
|           | 25–34           |          |       | 65–74    |          |       | 25–34           |          |       | 65–74    |          |       |
| 1983–1987 | 1.2             | 29.1     | 113.7 | 1.8      | 56.4     | 128.9 | 0.4             | 11.1     | 103.3 | 2.2      | 47.0     | 150.3 |
| 1988–1992 | 0.8             | 21.9     | 114.7 | 0.8      | 34.0     | 96.5  | 0.4             | 9.5      | 110.0 | 1.2      | 29.8     | 114.2 |
| 1993–1997 | 1.4             | 27.2     | 139.1 | 1.6      | 39.3     | 123.3 | 0.2             | 8.4      | 101.4 | 1.2      | 23.4     | 119.9 |
| 1998–2002 | 0.4             | 26.0     | 96.1  | 3.0      | 60.2     | 132.3 | 0.0             | 10.6     | 91.9  | 1.2      | 23.2     | 110.6 |
| 2003–2007 | 1.4             | 38.3     | 123.4 | 1.8      | 47.9     | 111.5 | 0.4             | 14.0     | 107.7 | 1.0      | 20.1     | 108.1 |
| 2008–2012 | 0.4             | 31.8     | 97.6  | 1.0      | 38.7     | 97.9  | 0.2             | 14.4     | 100.3 | 1.2      | 20.8     | 116.9 |
|           | 35–44           |          |       | >74 y/o  |          |       | 35–44           |          |       | >74 y/o  |          |       |
| 1983–1987 | 2.8             | 47.0     | 147.6 | 1.8      | 111.6    | 142.4 | 0.8             | 13.5     | 113.9 | 1.8      | 80.2     | 139.1 |
| 1988–1992 | 1.4             | 28.3     | 119.2 | 1.4      | 77.4     | 120.0 | 1.2             | 13.0     | 134.7 | 1.4      | 53.1     | 111.0 |
| 1993–1997 | 1.6             | 32.3     | 131.8 | 1.4      | 64.6     | 124.1 | 0.2             | 8.2      | 96.4  | 2.0      | 52.6     | 152.7 |
| 1998–2002 | 1.4             | 40.3     | 114.4 | 1.8      | 67.1     | 127.2 | 0.4             | 11.0     | 106.7 | 2.6      | 53.0     | 170.7 |
| 2003–2007 | 1.0             | 41.3     | 103.0 | 1.6      | 52.0     | 115.5 | 0.4             | 13.3     | 105.2 | 1.8      | 31.6     | 141.0 |
| 2008–2012 | 0.2             | 33.5     | 89.9  | 1.8      | 48.9     | 117.9 | 0.2             | 13.4     | 98.9  | 2.8      | 33.9     | 176.4 |

Secondary Medical Zone ID: 043

|           | Male            |                  |       |                 |                  |       | Female          |                  |       |                 |                  |       |
|-----------|-----------------|------------------|-------|-----------------|------------------|-------|-----------------|------------------|-------|-----------------|------------------|-------|
|           | Suicide         |                  |       | Suicide         |                  |       | Suicide         |                  |       | Suicide         |                  |       |
|           | Num<br>per year | Rate<br>/100,000 | × 100 | Num<br>per year | Rate<br>/100,000 | × 100 | Num<br>per year | Rate<br>/100,000 | × 100 | Num<br>per year | Rate<br>/100,000 | × 100 |
|           |                 |                  |       |                 |                  |       |                 |                  |       |                 |                  |       |
|           | Total (>10 y/o) |                  |       | 45–54           |                  |       | Total (>10 y/o) |                  |       | 45–54           |                  |       |
| 1983–1987 | 30.0            | 45.1             | 172.3 | 9.0             | 88.7             | 175.3 | 11.4            | 16.4             | 114.6 | 3.0             | 23.0             | 133.4 |
| 1988–1992 | 25.8            | 35.2             | 185.4 | 6.6             | 63.6             | 185.2 | 12.0            | 14.4             | 127.9 | 0.8             | 13.1             | 89.4  |
| 1993–1997 | 26.6            | 35.0             | 182.5 | 4.8             | 48.1             | 131.5 | 14.6            | 14.0             | 164.7 | 2.8             | 19.2             | 148.7 |
| 1998–2002 | 38.8            | 51.5             | 189.6 | 9.4             | 90.0             | 160.8 | 15.8            | 15.0             | 155.2 | 1.4             | 15.7             | 104.4 |
| 2003–2007 | 37.2            | 53.7             | 194.3 | 9.8             | 108.9            | 194.8 | 14.8            | 15.5             | 154.4 | 1.8             | 17.0             | 124.0 |
| 2008–2012 | 24.6            | 40.8             | 144.2 | 4.2             | 59.8             | 123.1 | 12.0            | 13.8             | 134.4 | 1.6             | 18.3             | 122.4 |
|           | 15–24           |                  |       | 55–64           |                  |       | 15–24           |                  |       | 55–64           |                  |       |
| 1983–1987 | 0.6             | 12.8             | 91.8  | 6.2             | 67.4             | 158.5 | 0.4             | 6.8              | 99.6  | 1.8             | 20.2             | 102.5 |
| 1988–1992 | 0.6             | 10.2             | 103.3 | 7.0             | 65.9             | 185.5 | 0.6             | 6.5              | 122.5 | 2.4             | 21.0             | 117.9 |
| 1993–1997 | 1.2             | 13.8             | 121.6 | 7.0             | 67.6             | 167.9 | 0.2             | 5.0              | 95.4  | 2.8             | 22.3             | 140.4 |
| 1998–2002 | 0.8             | 16.2             | 102.4 | 9.8             | 108.1            | 170.1 | 0.0             | 5.9              | 83.4  | 2.6             | 23.1             | 122.5 |
| 2003–2007 | 1.2             | 20.4             | 116.8 | 9.6             | 99.9             | 173.0 | 0.6             | 10.6             | 117.3 | 2.8             | 22.0             | 131.4 |
| 2008–2012 | 1.0             | 23.7             | 111.9 | 5.0             | 56.0             | 115.4 | 0.0             | 8.1              | 83.1  | 1.8             | 17.0             | 113.8 |
|           | 25–34           |                  |       | 65–74           |                  |       | 25–34           |                  |       | 65–74           |                  |       |
| 1983–1987 | 3.4             | 35.4             | 138.5 | 3.8             | 64.7             | 147.8 | 1.4             | 13.5             | 125.1 | 1.6             | 29.0             | 92.8  |
| 1988–1992 | 2.2             | 27.1             | 141.9 | 4.0             | 57.3             | 162.5 | 0.2             | 7.4              | 84.8  | 3.0             | 35.7             | 137.0 |
| 1993–1997 | 1.2             | 21.0             | 107.7 | 4.6             | 56.1             | 176.0 | 0.4             | 8.2              | 98.8  | 2.8             | 27.7             | 142.2 |
| 1998–2002 | 2.4             | 33.7             | 124.8 | 5.6             | 64.3             | 141.5 | 0.6             | 11.8             | 101.6 | 4.4             | 35.1             | 167.2 |
| 2003–2007 | 1.8             | 33.7             | 108.8 | 6.4             | 71.7             | 167.2 | 1.2             | 15.9             | 122.5 | 3.2             | 26.6             | 142.7 |
| 2008–2012 | 1.6             | 34.7             | 106.5 | 6.2             | 66.9             | 169.5 | 0.0             | 11.9             | 83.1  | 3.0             | 24.9             | 139.7 |
|           | 35–44           |                  |       | >74 y/o         |                  |       | 35–44           |                  |       | >74 y/o         |                  |       |
| 1983–1987 | 3.8             | 39.4             | 123.7 | 3.2             | 120.1            | 153.3 | 0.8             | 11.0             | 93.1  | 2.4             | 65.7             | 113.9 |
| 1988–1992 | 1.8             | 22.8             | 96.1  | 3.6             | 103.2            | 160.0 | 0.4             | 8.3              | 86.1  | 4.6             | 83.9             | 175.3 |
| 1993–1997 | 4.2             | 41.1             | 167.6 | 3.6             | 86.4             | 165.9 | 0.6             | 8.4              | 99.3  | 5.0             | 70.7             | 205.4 |
| 1998–2002 | 5.0             | 58.1             | 164.9 | 5.6             | 104.6            | 198.5 | 0.4             | 9.4              | 90.6  | 6.4             | 71.2             | 229.4 |
| 2003–2007 | 4.0             | 58.6             | 146.4 | 4.2             | 68.5             | 152.1 | 0.6             | 12.4             | 98.1  | 4.4             | 40.3             | 179.4 |
| 2008–2012 | 3.0             | 44.5             | 119.6 | 3.4             | 50.7             | 122.3 | 0.4             | 12.6             | 92.8  | 5.2             | 36.6             | 190.4 |

Secondary Medical Zone ID: 044

|                 | Male            |                  |       |                 |                  |       | Female          |                  |       |                 |                  |       |
|-----------------|-----------------|------------------|-------|-----------------|------------------|-------|-----------------|------------------|-------|-----------------|------------------|-------|
|                 | Suicide         |                  |       | Suicide         |                  |       | Suicide         |                  |       | Suicide         |                  |       |
|                 | Num<br>per year | Rate<br>/100,000 | × 100 | Num<br>per year | Rate<br>/100,000 | × 100 | Num<br>per year | Rate<br>/100,000 | × 100 | Num<br>per year | Rate<br>/100,000 | × 100 |
|                 |                 |                  |       |                 |                  |       |                 |                  |       |                 |                  |       |
| Total (>10 y/o) | 45–54           | Total (>10 y/o)  | 45–54 |                 |                  |       |                 |                  |       |                 |                  |       |
| 1983–1987       | 75.4            | 41.2             | 135.4 | 21.6            | 73.7             | 145.7 | 35.6            | 17.2             | 116.8 | 5.6             | 17.7             | 103.0 |
| 1988–1992       | 59.4            | 30.4             | 130.2 | 13.8            | 46.4             | 135.0 | 35.6            | 14.6             | 122.0 | 5.0             | 15.6             | 106.9 |
| 1993–1997       | 63.8            | 30.3             | 127.6 | 16.6            | 48.7             | 133.1 | 29.8            | 11.5             | 112.0 | 5.4             | 14.9             | 115.6 |
| 1998–2002       | 95.6            | 43.7             | 127.6 | 27.0            | 75.6             | 135.1 | 39.6            | 14.3             | 121.1 | 6.8             | 17.8             | 118.2 |
| 2003–2007       | 108.2           | 49.5             | 143.2 | 28.2            | 87.9             | 157.1 | 32.4            | 12.7             | 104.8 | 3.0             | 11.0             | 79.9  |
| 2008–2012       | 87.0            | 41.2             | 127.3 | 16.6            | 60.2             | 123.8 | 35.6            | 14.0             | 115.6 | 3.2             | 12.6             | 84.8  |
|                 | 15–24           |                  |       | 55–64           |                  |       | 15–24           |                  |       | 55–64           |                  |       |
| 1983–1987       | 6.0             | 20.3             | 145.4 | 13.4            | 57.1             | 134.4 | 1.6             | 6.2              | 90.2  | 6.2             | 22.5             | 114.0 |
| 1988–1992       | 2.6             | 9.3              | 94.0  | 11.4            | 42.6             | 120.1 | 0.6             | 3.4              | 65.3  | 6.6             | 20.9             | 116.8 |
| 1993–1997       | 4.0             | 12.4             | 109.8 | 12.6            | 46.2             | 114.8 | 0.6             | 3.4              | 65.3  | 5.6             | 17.7             | 111.3 |
| 1998–2002       | 4.0             | 14.8             | 93.8  | 21.2            | 76.5             | 120.3 | 1.0             | 5.2              | 74.4  | 7.0             | 21.6             | 114.9 |
| 2003–2007       | 4.2             | 17.8             | 101.9 | 26.4            | 82.5             | 142.9 | 1.8             | 8.4              | 93.2  | 6.6             | 18.8             | 112.3 |
| 2008–2012       | 3.8             | 20.6             | 97.1  | 20.2            | 58.6             | 120.6 | 2.4             | 11.5             | 118.3 | 5.6             | 15.6             | 104.6 |
|                 | 25–34           |                  |       | 65–74           |                  |       | 25–34           |                  |       | 65–74           |                  |       |
| 1983–1987       | 10.4            | 32.3             | 126.3 | 5.4             | 44.5             | 101.7 | 3.0             | 9.8              | 90.9  | 7.6             | 43.7             | 139.7 |
| 1988–1992       | 9.0             | 30.8             | 161.1 | 8.4             | 51.2             | 145.4 | 2.0             | 7.7              | 88.6  | 7.8             | 36.2             | 138.7 |
| 1993–1997       | 6.6             | 24.4             | 124.8 | 7.6             | 38.3             | 120.0 | 2.6             | 9.1              | 109.6 | 4.4             | 18.1             | 92.9  |
| 1998–2002       | 10.0            | 34.4             | 127.5 | 12.2            | 52.8             | 116.0 | 5.0             | 15.5             | 133.7 | 6.8             | 23.3             | 110.9 |
| 2003–2007       | 10.2            | 37.0             | 119.2 | 12.4            | 51.3             | 119.6 | 4.0             | 14.3             | 109.9 | 4.8             | 17.1             | 92.0  |
| 2008–2012       | 9.4             | 39.4             | 121.0 | 14.0            | 54.9             | 138.8 | 3.8             | 15.9             | 111.0 | 6.6             | 21.4             | 120.4 |
|                 | 35–44           |                  |       | >74 y/o         |                  |       | 35–44           |                  |       | >74 y/o         |                  |       |
| 1983–1987       | 12.8            | 37.9             | 119.0 | 5.8             | 101.6            | 129.7 | 4.8             | 13.2             | 112.0 | 6.8             | 76.4             | 132.5 |
| 1988–1992       | 8.8             | 25.2             | 106.5 | 5.2             | 68.0             | 105.5 | 3.8             | 10.3             | 106.7 | 9.6             | 72.2             | 150.8 |
| 1993–1997       | 9.6             | 29.6             | 120.7 | 6.8             | 67.9             | 130.5 | 2.2             | 7.4              | 86.9  | 8.8             | 50.5             | 146.8 |
| 1998–2002       | 13.8            | 47.1             | 133.6 | 7.2             | 58.1             | 110.2 | 3.2             | 10.7             | 103.9 | 9.8             | 42.6             | 137.3 |
| 2003–2007       | 17.2            | 62.5             | 155.9 | 9.4             | 56.0             | 124.3 | 3.6             | 13.0             | 103.0 | 8.6             | 29.0             | 129.3 |
| 2008–2012       | 13.6            | 48.0             | 129.0 | 9.4             | 46.7             | 112.7 | 3.6             | 13.6             | 100.1 | 10.0            | 27.2             | 141.3 |

Secondary Medical Zone ID: 045

|                 | Male            |                  |       |                 |                  |       | Female          |                  |       |                 |                  |       |
|-----------------|-----------------|------------------|-------|-----------------|------------------|-------|-----------------|------------------|-------|-----------------|------------------|-------|
|                 | Suicide         |                  |       | Suicide         |                  |       | Suicide         |                  |       | Suicide         |                  |       |
|                 | Num<br>per year | Rate<br>/100,000 | × 100 | Num<br>per year | Rate<br>/100,000 | × 100 | Num<br>per year | Rate<br>/100,000 | × 100 | Num<br>per year | Rate<br>/100,000 | × 100 |
|                 |                 |                  |       |                 |                  |       |                 |                  |       |                 |                  |       |
| Total (>10 y/o) | 45–54           | Total (>10 y/o)  | 45–54 |                 |                  |       |                 |                  |       |                 |                  |       |
| 1983–1987       | 33.8            | 47.5             | 178.6 | 10.6            | 96.8             | 191.5 | 18.8            | 20.9             | 161.6 | 2.4             | 20.1             | 116.7 |
| 1988–1992       | 26.4            | 33.9             | 172.8 | 5.4             | 52.7             | 153.3 | 20.4            | 18.3             | 185.7 | 2.0             | 17.1             | 117.0 |
| 1993–1997       | 28.8            | 34.1             | 175.6 | 5.0             | 46.2             | 126.4 | 20.4            | 15.9             | 203.0 | 1.4             | 13.8             | 106.7 |
| 1998–2002       | 41.4            | 49.7             | 175.7 | 13.2            | 103.2            | 184.4 | 20.8            | 16.6             | 178.0 | 2.2             | 17.7             | 117.5 |
| 2003–2007       | 38.8            | 49.5             | 171.3 | 8.2             | 81.6             | 145.9 | 20.4            | 15.3             | 180.7 | 1.4             | 14.4             | 105.4 |
| 2008–2012       | 27.4            | 38.6             | 133.5 | 6.2             | 67.9             | 139.6 | 17.6            | 15.3             | 159.5 | 1.2             | 15.4             | 103.1 |
|                 | 15–24           |                  |       | 55–64           |                  |       | 15–24           |                  |       | 55–64           |                  |       |
| 1983–1987       | 1.6             | 18.1             | 129.7 | 5.0             | 55.1             | 129.7 | 0.0             | 5.2              | 76.0  | 3.4             | 27.2             | 137.7 |
| 1988–1992       | 0.6             | 9.7              | 98.2  | 5.4             | 51.8             | 145.8 | 0.4             | 5.5              | 104.2 | 4.2             | 28.1             | 157.2 |
| 1993–1997       | 0.6             | 10.6             | 94.0  | 8.4             | 73.6             | 182.8 | 0.8             | 6.9              | 132.0 | 4.0             | 27.2             | 171.1 |
| 1998–2002       | 1.0             | 15.5             | 98.0  | 7.6             | 84.9             | 133.6 | 0.4             | 7.0              | 99.4  | 2.4             | 21.8             | 115.8 |
| 2003–2007       | 1.6             | 20.0             | 114.7 | 9.6             | 91.2             | 158.0 | 0.4             | 8.7              | 96.9  | 2.6             | 20.7             | 123.8 |
| 2008–2012       | 0.6             | 18.5             | 87.4  | 6.6             | 58.9             | 121.2 | 0.6             | 10.8             | 111.6 | 1.8             | 16.2             | 108.3 |
|                 | 25–34           |                  |       | 65–74           |                  |       | 25–34           |                  |       | 65–74           |                  |       |
| 1983–1987       | 3.2             | 30.6             | 119.8 | 5.0             | 80.0             | 182.7 | 1.0             | 10.9             | 101.0 | 4.2             | 51.6             | 165.2 |
| 1988–1992       | 3.0             | 29.1             | 152.2 | 3.6             | 52.3             | 148.4 | 0.6             | 8.4              | 97.3  | 5.2             | 52.4             | 200.9 |
| 1993–1997       | 2.4             | 26.1             | 133.8 | 4.8             | 54.7             | 171.5 | 1.0             | 10.1             | 120.9 | 4.0             | 34.0             | 174.2 |
| 1998–2002       | 1.2             | 24.0             | 88.8  | 7.8             | 77.1             | 169.4 | 0.4             | 10.4             | 90.1  | 5.2             | 38.1             | 181.1 |
| 2003–2007       | 3.8             | 42.3             | 136.4 | 5.8             | 63.8             | 148.7 | 0.6             | 12.3             | 95.0  | 2.4             | 22.0             | 118.1 |
| 2008–2012       | 1.4             | 29.5             | 90.7  | 4.2             | 50.7             | 128.4 | 1.0             | 15.5             | 108.1 | 4.2             | 29.4             | 165.1 |
|                 | 35–44           |                  |       | >74 y/o         |                  |       | 35–44           |                  |       | >74 y/o         |                  |       |
| 1983–1987       | 5.2             | 45.7             | 143.6 | 3.0             | 113.7            | 145.2 | 1.8             | 14.5             | 123.0 | 6.0             | 134.1            | 232.4 |
| 1988–1992       | 3.2             | 28.1             | 118.5 | 5.2             | 134.5            | 208.5 | 1.2             | 10.5             | 108.8 | 6.8             | 114.2            | 238.8 |
| 1993–1997       | 2.8             | 28.1             | 114.5 | 4.8             | 105.8            | 203.2 | 0.6             | 7.9              | 92.7  | 8.6             | 110.9            | 322.1 |
| 1998–2002       | 5.4             | 54.6             | 155.0 | 5.2             | 93.5             | 177.4 | 1.4             | 12.9             | 124.3 | 8.8             | 88.9             | 286.3 |
| 2003–2007       | 4.6             | 57.4             | 143.3 | 5.2             | 74.6             | 165.6 | 0.6             | 11.8             | 93.1  | 12.4            | 94.8             | 422.4 |
| 2008–2012       | 2.4             | 37.7             | 101.4 | 5.8             | 69.0             | 166.4 | 0.8             | 13.5             | 99.8  | 8.0             | 50.3             | 261.6 |

Secondary Medical Zone ID: 046

|           | Male            |                  |       |                 |                  |       | Female          |                  |       |                 |                  |       |
|-----------|-----------------|------------------|-------|-----------------|------------------|-------|-----------------|------------------|-------|-----------------|------------------|-------|
|           | Suicide         |                  |       | Suicide         |                  |       | Suicide         |                  |       | Suicide         |                  |       |
|           | Num<br>per year | Rate<br>/100,000 | × 100 | Num<br>per year | Rate<br>/100,000 | × 100 | Num<br>per year | Rate<br>/100,000 | × 100 | Num<br>per year | Rate<br>/100,000 | × 100 |
|           |                 |                  |       |                 |                  |       |                 |                  |       |                 |                  |       |
|           | Total (>10 y/o) |                  |       | 45–54           |                  |       | Total (>10 y/o) |                  |       | 45–54           |                  |       |
| 1983–1987 | 38.4            | 43.1             | 151.5 | 9.2             | 68.1             | 134.7 | 30.8            | 24.2             | 194.2 | 4.8             | 25.8             | 149.7 |
| 1988–1992 | 31.6            | 32.6             | 157.6 | 6.0             | 48.3             | 140.5 | 26.2            | 18.5             | 183.3 | 2.4             | 16.7             | 114.5 |
| 1993–1997 | 28.2            | 29.6             | 138.3 | 4.6             | 39.2             | 107.2 | 22.4            | 14.5             | 178.3 | 2.0             | 14.6             | 112.8 |
| 1998–2002 | 44.4            | 45.9             | 152.0 | 10.4            | 75.3             | 134.5 | 25.2            | 16.4             | 172.3 | 3.4             | 20.0             | 133.0 |
| 2003–2007 | 50.0            | 53.9             | 177.7 | 12.8            | 100.3            | 179.3 | 17.2            | 13.7             | 134.4 | 1.8             | 14.6             | 106.5 |
| 2008–2012 | 34.8            | 39.8             | 138.5 | 6.6             | 62.8             | 129.3 | 16.6            | 14.6             | 132.8 | 1.4             | 14.9             | 100.1 |
|           | 15–24           |                  |       | 55–64           |                  |       | 15–24           |                  |       | 55–64           |                  |       |
| 1983–1987 | 1.6             | 16.5             | 118.0 | 6.0             | 50.3             | 118.2 | 0.4             | 6.2              | 91.5  | 3.0             | 21.3             | 108.0 |
| 1988–1992 | 0.6             | 9.3              | 94.2  | 8.8             | 60.0             | 169.0 | 0.4             | 5.2              | 99.2  | 5.4             | 28.1             | 157.6 |
| 1993–1997 | 1.8             | 14.5             | 128.0 | 6.8             | 52.7             | 130.8 | 0.2             | 4.5              | 87.1  | 3.6             | 21.7             | 136.2 |
| 1998–2002 | 1.2             | 15.8             | 100.1 | 12.0            | 101.3            | 159.5 | 0.4             | 6.7              | 95.1  | 5.6             | 30.8             | 163.7 |
| 2003–2007 | 1.4             | 18.9             | 108.1 | 9.8             | 81.6             | 141.4 | 0.0             | 6.4              | 71.4  | 2.8             | 19.7             | 117.7 |
| 2008–2012 | 0.8             | 19.7             | 92.9  | 8.4             | 61.5             | 126.5 | 0.2             | 8.3              | 85.4  | 0.8             | 11.9             | 80.0  |
|           | 25–34           |                  |       | 65–74           |                  |       | 25–34           |                  |       | 65–74           |                  |       |
| 1983–1987 | 3.8             | 29.8             | 116.6 | 6.2             | 75.6             | 172.8 | 2.8             | 16.5             | 153.0 | 8.0             | 70.1             | 224.4 |
| 1988–1992 | 1.6             | 18.1             | 94.6  | 3.2             | 39.5             | 112.0 | 1.0             | 9.3              | 107.2 | 8.0             | 61.1             | 234.4 |
| 1993–1997 | 2.2             | 23.3             | 119.1 | 6.2             | 54.0             | 169.1 | 0.4             | 7.4              | 88.9  | 5.6             | 36.2             | 185.9 |
| 1998–2002 | 3.6             | 35.4             | 131.0 | 7.2             | 59.7             | 131.2 | 0.4             | 10.0             | 85.9  | 6.8             | 38.7             | 184.1 |
| 2003–2007 | 3.8             | 39.9             | 128.6 | 6.6             | 57.8             | 134.8 | 1.0             | 13.4             | 103.1 | 2.8             | 20.5             | 110.0 |
| 2008–2012 | 2.2             | 32.5             | 99.8  | 6.2             | 56.8             | 143.8 | 2.0             | 18.9             | 132.1 | 3.2             | 22.7             | 127.4 |
|           | 35–44           |                  |       | >74 y/o         |                  |       | 35–44           |                  |       | >74 y/o         |                  |       |
| 1983–1987 | 5.6             | 41.7             | 130.9 | 6.0             | 145.2            | 185.4 | 3.2             | 17.8             | 150.3 | 8.6             | 144.2            | 250.0 |
| 1988–1992 | 5.8             | 36.9             | 155.6 | 5.4             | 108.4            | 168.1 | 1.2             | 9.6              | 99.9  | 7.8             | 101.0            | 211.1 |
| 1993–1997 | 2.6             | 23.5             | 95.7  | 4.0             | 72.6             | 139.4 | 0.4             | 6.5              | 76.6  | 10.2            | 102.1            | 296.6 |
| 1998–2002 | 4.2             | 40.5             | 115.1 | 5.8             | 81.4             | 154.4 | 0.6             | 8.9              | 85.7  | 8.0             | 65.2             | 209.9 |
| 2003–2007 | 7.6             | 74.2             | 185.3 | 7.8             | 82.4             | 182.9 | 1.0             | 12.6             | 100.0 | 7.8             | 48.9             | 218.1 |
| 2008–2012 | 3.6             | 42.1             | 113.2 | 7.0             | 63.9             | 154.1 | 2.0             | 17.3             | 127.5 | 7.0             | 35.9             | 186.5 |

Secondary Medical Zone ID: 047

|                 | Male            |                  |       |                 |                  |       | Female          |                  |       |                 |                  |       |
|-----------------|-----------------|------------------|-------|-----------------|------------------|-------|-----------------|------------------|-------|-----------------|------------------|-------|
|                 | Suicide         |                  |       | Suicide         |                  |       | Suicide         |                  |       | Suicide         |                  |       |
|                 | Num<br>per year | Rate<br>/100,000 | × 100 | Num<br>per year | Rate<br>/100,000 | × 100 | Num<br>per year | Rate<br>/100,000 | × 100 | Num<br>per year | Rate<br>/100,000 | × 100 |
|                 |                 |                  |       |                 |                  |       |                 |                  |       |                 |                  |       |
| Total (>10 y/o) | 45–54           | Total (>10 y/o)  | 45–54 |                 |                  |       |                 |                  |       |                 |                  |       |
| 1983–1987       | 20.2            | 35.4             | 117.6 | 3.4             | 45.4             | 89.8  | 15.0            | 18.7             | 138.3 | 2.6             | 21.6             | 125.3 |
| 1988–1992       | 17.4            | 27.2             | 126.4 | 1.6             | 28.1             | 81.8  | 14.2            | 15.7             | 143.3 | 0.8             | 13.3             | 91.2  |
| 1993–1997       | 21.6            | 30.9             | 146.6 | 6.4             | 57.6             | 157.4 | 13.2            | 13.2             | 149.3 | 1.4             | 14.3             | 111.0 |
| 1998–2002       | 28.2            | 42.7             | 137.3 | 8.2             | 79.1             | 141.4 | 13.0            | 14.1             | 131.5 | 2.0             | 17.6             | 117.1 |
| 2003–2007       | 28.6            | 44.8             | 145.0 | 6.2             | 71.2             | 127.3 | 14.0            | 14.7             | 145.0 | 1.4             | 14.9             | 108.7 |
| 2008–2012       | 25.2            | 40.6             | 137.4 | 4.6             | 59.6             | 122.7 | 12.6            | 14.5             | 134.9 | 2.0             | 19.5             | 130.4 |
|                 | 15–24           |                  |       | 55–64           |                  |       | 15–24           |                  |       | 55–64           |                  |       |
| 1983–1987       | 1.2             | 16.7             | 120.1 | 3.6             | 45.3             | 106.5 | 0.2             | 6.1              | 90.0  | 1.8             | 19.5             | 98.9  |
| 1988–1992       | 0.2             | 8.6              | 87.3  | 5.4             | 52.9             | 148.9 | 0.4             | 5.7              | 108.7 | 1.4             | 16.5             | 92.4  |
| 1993–1997       | 0.8             | 12.0             | 106.1 | 3.4             | 42.8             | 106.4 | 0.8             | 7.2              | 137.6 | 1.4             | 15.9             | 100.0 |
| 1998–2002       | 1.0             | 16.7             | 105.6 | 5.6             | 74.0             | 116.5 | 0.6             | 8.0              | 114.6 | 2.0             | 21.1             | 112.1 |
| 2003–2007       | 1.4             | 20.9             | 119.7 | 6.6             | 76.4             | 132.4 | 1.0             | 12.4             | 137.8 | 1.2             | 16.4             | 98.0  |
| 2008–2012       | 1.2             | 24.3             | 114.7 | 6.4             | 62.4             | 128.5 | 0.4             | 10.2             | 105.6 | 2.2             | 18.0             | 121.0 |
|                 | 25–34           |                  |       | 65–74           |                  |       | 25–34           |                  |       | 65–74           |                  |       |
| 1983–1987       | 1.6             | 22.6             | 88.3  | 3.6             | 61.4             | 140.3 | 0.8             | 10.4             | 96.4  | 3.4             | 44.8             | 143.4 |
| 1988–1992       | 0.6             | 14.8             | 77.2  | 3.8             | 53.1             | 150.8 | 0.6             | 8.8              | 101.2 | 3.6             | 39.7             | 152.1 |
| 1993–1997       | 0.8             | 17.9             | 91.8  | 2.4             | 34.5             | 108.2 | 0.2             | 7.3              | 88.0  | 4.8             | 39.4             | 202.3 |
| 1998–2002       | 2.2             | 31.8             | 117.6 | 4.2             | 52.4             | 115.1 | 0.2             | 10.0             | 86.6  | 3.4             | 29.2             | 139.0 |
| 2003–2007       | 2.6             | 37.8             | 121.9 | 4.6             | 56.7             | 132.0 | 1.2             | 15.6             | 120.1 | 3.0             | 25.8             | 138.5 |
| 2008–2012       | 3.0             | 40.8             | 125.3 | 3.8             | 49.8             | 126.1 | 0.6             | 14.2             | 98.9  | 1.8             | 20.1             | 113.2 |
|                 | 35–44           |                  |       | >74 y/o         |                  |       | 35–44           |                  |       | >74 y/o         |                  |       |
| 1983–1987       | 3.8             | 39.9             | 125.4 | 2.8             | 99.5             | 127.0 | 0.6             | 10.5             | 89.0  | 5.6             | 123.4            | 213.9 |
| 1988–1992       | 2.6             | 26.7             | 112.6 | 3.2             | 89.8             | 139.3 | 1.4             | 11.5             | 118.9 | 6.0             | 102.5            | 214.1 |
| 1993–1997       | 3.6             | 34.9             | 142.5 | 4.2             | 91.0             | 174.8 | 0.8             | 8.9              | 105.1 | 3.8             | 54.7             | 159.1 |
| 1998–2002       | 3.6             | 44.5             | 126.2 | 3.4             | 67.0             | 127.0 | 0.4             | 9.1              | 87.9  | 4.4             | 49.1             | 158.2 |
| 2003–2007       | 3.2             | 49.3             | 122.9 | 4.0             | 61.1             | 135.8 | 0.4             | 11.4             | 90.0  | 5.8             | 48.6             | 216.4 |
| 2008–2012       | 2.4             | 39.8             | 107.1 | 3.6             | 49.5             | 119.4 | 1.0             | 14.7             | 108.6 | 4.6             | 32.4             | 168.6 |



Secondary Medical Zone ID: 048

|           | Male            |          |       |          |          |       | Female          |          |       |          |          |       |
|-----------|-----------------|----------|-------|----------|----------|-------|-----------------|----------|-------|----------|----------|-------|
|           | Suicide         |          |       | Suicide  |          |       | Suicide         |          |       | Suicide  |          |       |
|           | Num             | Rate     | × 100 | Num      | Rate     | × 100 | Num             | Rate     | × 100 | Num      | Rate     | × 100 |
|           | per year        | /100,000 |       | per year | /100,000 |       | per year        | /100,000 |       | per year | /100,000 |       |
|           | Total (>10 y/o) |          |       | 45–54    |          |       | Total (>10 y/o) |          |       | 45–54    |          |       |
| 1983–1987 | 18.0            | 37.9     | 132.7 | 5.2      | 70.1     | 138.6 | 11.2            | 17.7     | 134.5 | 2.8      | 24.6     | 142.7 |
| 1988–1992 | 13.4            | 27.5     | 125.8 | 2.2      | 37.5     | 109.3 | 8.8             | 13.9     | 121.7 | 1.8      | 18.3     | 125.3 |
| 1993–1997 | 17.2            | 30.4     | 148.7 | 2.6      | 40.5     | 110.6 | 10.6            | 13.0     | 152.1 | 1.2      | 14.8     | 114.9 |
| 1998–2002 | 20.6            | 40.7     | 132.2 | 4.2      | 62.1     | 110.9 | 9.0             | 13.9     | 122.6 | 0.8      | 14.7     | 97.6  |
| 2003–2007 | 22.0            | 44.5     | 146.2 | 5.2      | 74.3     | 132.9 | 8.4             | 13.9     | 123.1 | 1.2      | 15.4     | 112.5 |
| 2008–2012 | 16.2            | 37.3     | 122.1 | 3.8      | 59.5     | 122.4 | 6.6             | 13.1     | 110.3 | 0.6      | 14.3     | 95.8  |
|           | 15–24           |          |       | 55–64    |          |       | 15–24           |          |       | 55–64    |          |       |
| 1983–1987 | 1.8             | 22.2     | 159.0 | 3.0      | 45.7     | 107.6 | 0.0             | 5.7      | 82.8  | 1.6      | 20.6     | 104.4 |
| 1988–1992 | 0.8             | 11.6     | 116.7 | 2.4      | 36.5     | 102.9 | 0.0             | 4.4      | 84.3  | 1.2      | 17.2     | 96.4  |
| 1993–1997 | 0.4             | 11.1     | 98.3  | 3.6      | 50.5     | 125.3 | 0.0             | 4.4      | 85.0  | 2.2      | 21.7     | 136.8 |
| 1998–2002 | 0.4             | 14.8     | 93.9  | 4.2      | 73.4     | 115.6 | 0.4             | 7.7      | 109.1 | 2.8      | 26.4     | 140.4 |
| 2003–2007 | 1.6             | 23.2     | 133.2 | 4.4      | 70.9     | 122.8 | 0.8             | 12.0     | 133.5 | 0.6      | 15.5     | 92.6  |
| 2008–2012 | 1.0             | 24.5     | 115.7 | 2.4      | 45.8     | 94.3  | 0.4             | 10.7     | 110.8 | 0.2      | 12.5     | 83.5  |
|           | 25–34           |          |       | 65–74    |          |       | 25–34           |          |       | 65–74    |          |       |
| 1983–1987 | 2.6             | 32.4     | 126.8 | 2.4      | 54.3     | 124.0 | 0.8             | 11.5     | 106.7 | 3.0      | 47.7     | 152.6 |
| 1988–1992 | 2.4             | 29.6     | 155.1 | 2.8      | 48.9     | 138.7 | 0.4             | 8.5      | 98.0  | 1.8      | 29.1     | 111.5 |
| 1993–1997 | 0.8             | 19.4     | 99.3  | 3.6      | 50.3     | 157.6 | 0.0             | 6.9      | 82.6  | 3.8      | 37.7     | 193.3 |
| 1998–2002 | 1.8             | 32.0     | 118.6 | 5.0      | 65.9     | 144.8 | 0.4             | 11.5     | 99.1  | 2.0      | 24.3     | 115.8 |
| 2003–2007 | 1.8             | 36.2     | 116.9 | 1.8      | 39.8     | 92.7  | 0.6             | 13.8     | 106.3 | 1.4      | 19.8     | 106.5 |
| 2008–2012 | 1.2             | 33.6     | 103.0 | 1.6      | 38.7     | 98.0  | 0.6             | 15.3     | 106.7 | 1.0      | 18.2     | 102.0 |
|           | 35–44           |          |       | >74 y/o  |          |       | 35–44           |          |       | >74 y/o  |          |       |
| 1983–1987 | 1.6             | 30.4     | 95.5  | 1.4      | 79.7     | 101.7 | 0.8             | 12.4     | 104.7 | 2.2      | 72.8     | 126.1 |
| 1988–1992 | 1.8             | 25.6     | 108.2 | 1.0      | 54.8     | 84.9  | 1.0             | 11.1     | 115.2 | 2.6      | 65.6     | 137.0 |
| 1993–1997 | 3.2             | 36.8     | 150.3 | 3.0      | 82.2     | 157.8 | 0.2             | 7.2      | 84.7  | 3.2      | 59.3     | 172.2 |
| 1998–2002 | 3.0             | 44.8     | 127.2 | 2.0      | 55.8     | 105.8 | 1.0             | 12.5     | 120.9 | 1.6      | 29.0     | 93.3  |
| 2003–2007 | 3.2             | 56.1     | 140.0 | 3.6      | 65.2     | 144.7 | 0.6             | 13.0     | 102.7 | 3.2      | 36.4     | 162.2 |
| 2008–2012 | 2.2             | 42.7     | 114.9 | 4.0      | 61.2     | 147.5 | 0.0             | 11.5     | 85.1  | 3.8      | 33.4     | 173.8 |

Secondary Medical Zone ID: 049

|                 | Male            |                  |       |                 |                  |       | Female          |                  |       |                 |                  |       |
|-----------------|-----------------|------------------|-------|-----------------|------------------|-------|-----------------|------------------|-------|-----------------|------------------|-------|
|                 | Suicide         |                  |       | Suicide         |                  |       | Suicide         |                  |       | Suicide         |                  |       |
|                 | Num<br>per year | Rate<br>/100,000 | × 100 | Num<br>per year | Rate<br>/100,000 | × 100 | Num<br>per year | Rate<br>/100,000 | × 100 | Num<br>per year | Rate<br>/100,000 | × 100 |
|                 |                 |                  |       |                 |                  |       |                 |                  |       |                 |                  |       |
| Total (>10 y/o) | 45–54           | Total (>10 y/o)  | 45–54 |                 |                  |       |                 |                  |       |                 |                  |       |
| 1983–1987       | 66.4            | 29.0             | 86.3  | 17.8            | 47.6             | 94.2  | 52.4            | 17.2             | 118.1 | 7.0             | 17.5             | 101.8 |
| 1988–1992       | 64.4            | 25.0             | 102.0 | 11.2            | 30.9             | 90.1  | 40.0            | 12.3             | 98.8  | 5.8             | 15.3             | 104.3 |
| 1993–1997       | 68.0            | 25.3             | 100.6 | 15.0            | 36.4             | 99.5  | 33.8            | 10.0             | 94.6  | 4.8             | 12.4             | 96.1  |
| 1998–2002       | 85.0            | 32.2             | 85.9  | 22.6            | 51.8             | 92.6  | 41.0            | 11.8             | 97.5  | 4.0             | 11.3             | 75.0  |
| 2003–2007       | 101.2           | 37.1             | 100.8 | 20.6            | 51.6             | 92.3  | 38.2            | 11.8             | 95.9  | 3.0             | 9.5              | 69.5  |
| 2008–2012       | 81.8            | 32.6             | 89.9  | 17.4            | 49.6             | 102.1 | 37.0            | 12.3             | 95.5  | 3.2             | 10.9             | 72.7  |
|                 | 15–24           |                  |       | 55–64           |                  |       | 15–24           |                  |       | 55–64           |                  |       |
| 1983–1987       | 3.6             | 12.0             | 85.9  | 12.8            | 39.1             | 92.0  | 4.0             | 10.0             | 145.7 | 7.4             | 18.9             | 95.6  |
| 1988–1992       | 3.4             | 10.0             | 101.4 | 13.2            | 35.7             | 100.6 | 1.4             | 4.5              | 85.6  | 6.4             | 16.1             | 90.0  |
| 1993–1997       | 3.4             | 10.2             | 90.1  | 14.6            | 40.4             | 100.4 | 2.4             | 6.1              | 117.3 | 4.8             | 13.1             | 82.7  |
| 1998–2002       | 3.8             | 12.7             | 80.2  | 15.2            | 45.7             | 71.9  | 3.0             | 8.1              | 115.9 | 6.2             | 17.5             | 92.9  |
| 2003–2007       | 5.6             | 18.3             | 104.7 | 25.0            | 62.6             | 108.4 | 2.8             | 9.1              | 101.0 | 6.4             | 16.6             | 98.8  |
| 2008–2012       | 6.6             | 24.4             | 115.2 | 16.2            | 39.6             | 81.6  | 4.4             | 14.2             | 146.3 | 4.4             | 12.0             | 80.2  |
|                 | 25–34           |                  |       | 65–74           |                  |       | 25–34           |                  |       | 65–74           |                  |       |
| 1983–1987       | 7.2             | 19.8             | 77.3  | 5.8             | 31.6             | 72.2  | 2.4             | 7.4              | 68.9  | 11.6            | 43.2             | 138.1 |
| 1988–1992       | 6.8             | 19.6             | 102.7 | 9.0             | 37.8             | 107.3 | 2.2             | 7.1              | 82.2  | 9.2             | 29.1             | 111.6 |
| 1993–1997       | 8.2             | 23.8             | 121.8 | 8.8             | 30.5             | 95.5  | 1.2             | 5.4              | 65.2  | 5.0             | 14.4             | 74.0  |
| 1998–2002       | 8.8             | 26.3             | 97.2  | 12.0            | 38.3             | 84.2  | 3.4             | 10.7             | 92.6  | 5.8             | 16.0             | 76.0  |
| 2003–2007       | 13.2            | 36.6             | 118.1 | 10.8            | 35.1             | 81.7  | 3.2             | 10.7             | 82.3  | 6.2             | 17.1             | 91.9  |
| 2008–2012       | 8.0             | 27.0             | 82.8  | 10.2            | 34.1             | 86.4  | 3.8             | 13.1             | 91.2  | 5.4             | 16.3             | 91.6  |
|                 | 35–44           |                  |       | >74 y/o         |                  |       | 35–44           |                  |       | >74 y/o         |                  |       |
| 1983–1987       | 12.6            | 30.4             | 95.6  | 6.4             | 65.5             | 83.6  | 4.0             | 10.6             | 90.1  | 15.8            | 90.8             | 157.5 |
| 1988–1992       | 12.4            | 27.4             | 115.7 | 8.2             | 61.1             | 94.8  | 2.4             | 7.1              | 73.2  | 12.4            | 55.0             | 115.0 |
| 1993–1997       | 9.8             | 24.2             | 98.7  | 8.2             | 50.8             | 97.6  | 3.6             | 8.9              | 104.7 | 12.0            | 43.2             | 125.4 |
| 1998–2002       | 13.8            | 37.8             | 107.3 | 8.6             | 43.6             | 82.7  | 2.6             | 8.2              | 79.6  | 15.8            | 44.2             | 142.3 |
| 2003–2007       | 14.2            | 42.1             | 105.0 | 11.2            | 43.3             | 96.1  | 4.6             | 13.4             | 105.7 | 11.6            | 26.1             | 116.5 |
| 2008–2012       | 12.8            | 37.8             | 101.6 | 10.6            | 35.4             | 85.2  | 3.4             | 11.5             | 84.8  | 12.4            | 23.7             | 123.4 |

Secondary Medical Zone ID: 050

|           | Male            |                  |       |                 |                  |       | Female          |                  |       |                 |                  |       |
|-----------|-----------------|------------------|-------|-----------------|------------------|-------|-----------------|------------------|-------|-----------------|------------------|-------|
|           | Suicide         |                  |       | Suicide         |                  |       | Suicide         |                  |       | Suicide         |                  |       |
|           | Num<br>per year | Rate<br>/100,000 | × 100 | Num<br>per year | Rate<br>/100,000 | × 100 | Num<br>per year | Rate<br>/100,000 | × 100 | Num<br>per year | Rate<br>/100,000 | × 100 |
|           |                 |                  |       |                 |                  |       |                 |                  |       |                 |                  |       |
|           | Total (>10 y/o) |                  |       | 45–54           |                  |       | Total (>10 y/o) |                  |       | 45–54           |                  |       |
| 1983–1987 | 17.2            | 35.5             | 117.6 | 3.8             | 53.7             | 106.1 | 7.6             | 15.1             | 96.9  | 0.8             | 14.9             | 86.3  |
| 1988–1992 | 15.4            | 27.8             | 128.9 | 2.6             | 38.0             | 110.5 | 11.6            | 15.2             | 138.8 | 0.6             | 13.3             | 90.7  |
| 1993–1997 | 15.8            | 28.2             | 126.8 | 3.6             | 43.7             | 119.5 | 8.0             | 11.4             | 116.9 | 0.8             | 12.9             | 99.5  |
| 1998–2002 | 26.8            | 43.6             | 147.7 | 4.4             | 57.6             | 103.0 | 10.8            | 13.9             | 129.7 | 1.6             | 17.2             | 114.4 |
| 2003–2007 | 28.6            | 48.5             | 163.1 | 8.0             | 93.3             | 166.9 | 12.6            | 14.6             | 149.3 | 0.6             | 12.4             | 90.7  |
| 2008–2012 | 20.6            | 38.2             | 131.1 | 3.0             | 50.2             | 103.4 | 10.4            | 14.1             | 131.8 | 0.8             | 14.6             | 98.2  |
|           | 15–24           |                  |       | 55–64           |                  |       | 15–24           |                  |       | 55–64           |                  |       |
| 1983–1987 | 1.0             | 15.6             | 112.0 | 4.0             | 52.0             | 122.3 | 0.0             | 5.4              | 79.7  | 0.8             | 15.8             | 80.0  |
| 1988–1992 | 1.2             | 12.6             | 127.2 | 3.8             | 46.0             | 129.6 | 0.2             | 5.0              | 95.5  | 1.4             | 17.6             | 98.6  |
| 1993–1997 | 0.4             | 10.6             | 93.4  | 3.0             | 43.7             | 108.6 | 0.0             | 4.3              | 81.6  | 1.6             | 18.1             | 113.9 |
| 1998–2002 | 1.4             | 19.0             | 120.0 | 5.4             | 79.5             | 125.2 | 0.4             | 7.4              | 105.1 | 1.4             | 19.8             | 105.2 |
| 2003–2007 | 1.4             | 20.9             | 119.9 | 6.6             | 83.4             | 144.5 | 0.2             | 8.2              | 90.9  | 1.2             | 17.5             | 104.5 |
| 2008–2012 | 1.8             | 28.0             | 131.8 | 3.0             | 45.9             | 94.6  | 0.4             | 10.2             | 105.0 | 1.4             | 16.4             | 109.9 |
|           | 25–34           |                  |       | 65–74           |                  |       | 25–34           |                  |       | 65–74           |                  |       |
| 1983–1987 | 2.8             | 30.9             | 121.1 | 1.2             | 38.6             | 88.1  | 1.2             | 12.6             | 117.0 | 2.6             | 41.4             | 132.5 |
| 1988–1992 | 2.2             | 26.0             | 136.3 | 2.0             | 39.6             | 112.3 | 0.6             | 8.9              | 102.7 | 3.2             | 40.5             | 155.1 |
| 1993–1997 | 1.6             | 23.3             | 119.3 | 1.8             | 32.3             | 101.3 | 0.2             | 7.4              | 89.0  | 3.0             | 30.6             | 157.2 |
| 1998–2002 | 2.6             | 35.0             | 129.7 | 4.6             | 61.3             | 134.7 | 0.2             | 10.3             | 88.5  | 2.6             | 27.0             | 128.7 |
| 2003–2007 | 3.4             | 45.1             | 145.6 | 3.2             | 50.6             | 118.0 | 0.6             | 13.2             | 101.8 | 3.4             | 30.2             | 162.0 |
| 2008–2012 | 1.0             | 30.4             | 93.5  | 3.8             | 54.1             | 136.9 | 0.6             | 14.7             | 102.3 | 1.4             | 19.6             | 110.3 |
|           | 35–44           |                  |       | >74 y/o         |                  |       | 35–44           |                  |       | >74 y/o         |                  |       |
| 1983–1987 | 2.4             | 33.3             | 104.5 | 2.0             | 97.3             | 124.2 | 0.4             | 10.4             | 88.0  | 1.8             | 61.3             | 106.3 |
| 1988–1992 | 1.2             | 19.7             | 83.2  | 2.4             | 85.2             | 132.1 | 0.2             | 8.0              | 82.7  | 5.4             | 110.2            | 230.3 |
| 1993–1997 | 2.2             | 27.2             | 111.1 | 3.2             | 84.6             | 162.5 | 0.4             | 7.7              | 90.7  | 2.0             | 39.2             | 114.0 |
| 1998–2002 | 4.2             | 51.2             | 145.4 | 4.0             | 83.6             | 158.7 | 0.4             | 9.4              | 90.6  | 4.0             | 53.5             | 172.2 |
| 2003–2007 | 2.8             | 48.3             | 120.6 | 3.0             | 55.9             | 124.2 | 1.4             | 16.0             | 126.5 | 5.0             | 49.5             | 220.5 |
| 2008–2012 | 2.8             | 44.6             | 119.9 | 5.2             | 71.0             | 171.2 | 0.8             | 14.5             | 106.8 | 5.0             | 39.6             | 205.9 |

Secondary Medical Zone ID: 051

|           | Male            |          |       |          |          |       | Female          |          |       |          |          |       |
|-----------|-----------------|----------|-------|----------|----------|-------|-----------------|----------|-------|----------|----------|-------|
|           | Suicide         |          |       | Suicide  |          |       | Suicide         |          |       | Suicide  |          |       |
|           | Num             | Rate     | × 100 | Num      | Rate     | × 100 | Num             | Rate     | × 100 | Num      | Rate     | × 100 |
|           | per year        | /100,000 |       | per year | /100,000 |       | per year        | /100,000 |       | per year | /100,000 |       |
|           | Total (>10 y/o) |          |       | 45–54    |          |       | Total (>10 y/o) |          |       | 45–54    |          |       |
| 1983–1987 | 40.8            | 36.3     | 114.1 | 11.6     | 64.7     | 128.0 | 21.2            | 15.5     | 102.9 | 3.6      | 18.7     | 108.7 |
| 1988–1992 | 32.6            | 27.2     | 114.2 | 7.0      | 41.4     | 120.5 | 23.2            | 13.9     | 120.3 | 1.6      | 12.5     | 85.8  |
| 1993–1997 | 35.0            | 27.4     | 116.4 | 8.8      | 45.9     | 125.4 | 20.4            | 11.4     | 121.9 | 1.4      | 11.0     | 85.4  |
| 1998–2002 | 47.6            | 37.9     | 110.3 | 14.0     | 70.0     | 125.0 | 21.6            | 12.6     | 114.1 | 1.6      | 12.4     | 82.5  |
| 2003–2007 | 51.2            | 42.7     | 119.6 | 13.0     | 72.1     | 128.9 | 15.8            | 11.8     | 95.8  | 2.0      | 13.1     | 95.6  |
| 2008–2012 | 50.0            | 40.3     | 127.4 | 8.8      | 56.5     | 116.3 | 15.8            | 12.5     | 99.7  | 2.2      | 15.3     | 102.7 |
|           | 15–24           |          |       | 55–64    |          |       | 15–24           |          |       | 55–64    |          |       |
| 1983–1987 | 2.6             | 16.2     | 116.1 | 6.8      | 42.6     | 100.1 | 0.4             | 5.3      | 76.9  | 3.4      | 18.2     | 92.2  |
| 1988–1992 | 2.4             | 12.3     | 124.6 | 5.0      | 31.2     | 88.0  | 0.8             | 5.5      | 103.9 | 3.8      | 18.9     | 105.7 |
| 1993–1997 | 1.0             | 9.1      | 80.5  | 9.0      | 51.7     | 128.4 | 0.8             | 5.5      | 105.4 | 1.6      | 11.9     | 74.9  |
| 1998–2002 | 1.2             | 11.9     | 75.5  | 8.0      | 56.2     | 88.4  | 0.2             | 5.0      | 71.8  | 3.2      | 19.6     | 104.1 |
| 2003–2007 | 2.2             | 17.0     | 97.3  | 9.0      | 55.7     | 96.5  | 0.6             | 7.4      | 82.5  | 2.6      | 16.7     | 99.7  |
| 2008–2012 | 2.4             | 21.3     | 100.6 | 10.4     | 54.8     | 112.8 | 0.2             | 6.6      | 67.8  | 1.4      | 12.0     | 80.4  |
|           | 25–34           |          |       | 65–74    |          |       | 25–34           |          |       | 65–74    |          |       |
| 1983–1987 | 4.8             | 27.0     | 105.8 | 3.6      | 40.2     | 91.9  | 1.6             | 10.2     | 94.7  | 3.0      | 26.2     | 83.7  |
| 1988–1992 | 4.4             | 25.6     | 133.8 | 3.8      | 34.7     | 98.5  | 1.0             | 7.9      | 91.1  | 5.6      | 33.8     | 129.5 |
| 1993–1997 | 3.6             | 23.2     | 118.7 | 6.0      | 41.2     | 129.1 | 0.6             | 6.8      | 82.1  | 5.6      | 28.0     | 143.5 |
| 1998–2002 | 3.0             | 24.2     | 89.7  | 8.6      | 55.3     | 121.6 | 0.8             | 9.5      | 82.1  | 4.6      | 23.9     | 113.8 |
| 2003–2007 | 5.0             | 34.6     | 111.7 | 6.8      | 47.5     | 110.6 | 1.4             | 12.4     | 95.3  | 1.6      | 13.4     | 71.9  |
| 2008–2012 | 5.0             | 37.1     | 113.8 | 6.8      | 47.7     | 120.8 | 2.0             | 15.9     | 110.9 | 2.0      | 15.9     | 89.1  |
|           | 35–44           |          |       | >74 y/o  |          |       | 35–44           |          |       | >74 y/o  |          |       |
| 1983–1987 | 7.8             | 40.6     | 127.6 | 3.6      | 76.4     | 97.5  | 1.8             | 11.5     | 97.7  | 7.4      | 82.6     | 143.2 |
| 1988–1992 | 4.8             | 24.8     | 104.5 | 5.2      | 80.8     | 125.3 | 1.2             | 8.4      | 87.5  | 9.0      | 78.3     | 163.6 |
| 1993–1997 | 3.2             | 20.1     | 81.8  | 3.4      | 48.9     | 93.8  | 1.2             | 7.9      | 93.0  | 9.2      | 64.9     | 188.6 |
| 1998–2002 | 6.6             | 40.5     | 115.1 | 6.2      | 65.3     | 123.8 | 1.4             | 10.0     | 97.1  | 9.8      | 54.6     | 175.7 |
| 2003–2007 | 9.8             | 62.6     | 156.3 | 5.4      | 47.3     | 105.0 | 1.4             | 11.9     | 93.9  | 6.2      | 28.8     | 128.3 |
| 2008–2012 | 8.2             | 50.5     | 135.7 | 8.2      | 57.5     | 138.5 | 2.0             | 14.5     | 107.0 | 6.0      | 24.3     | 126.2 |

Secondary Medical Zone ID: 052

|                 | Male            |                  |       |                 |                  |       | Female          |                  |       |                 |                  |       |
|-----------------|-----------------|------------------|-------|-----------------|------------------|-------|-----------------|------------------|-------|-----------------|------------------|-------|
|                 | Suicide         |                  |       | Suicide         |                  |       | Suicide         |                  |       | Suicide         |                  |       |
|                 | Num<br>per year | Rate<br>/100,000 | × 100 | Num<br>per year | Rate<br>/100,000 | × 100 | Num<br>per year | Rate<br>/100,000 | × 100 | Num<br>per year | Rate<br>/100,000 | × 100 |
|                 |                 |                  |       |                 |                  |       |                 |                  |       |                 |                  |       |
| Total (>10 y/o) | 45–54           | Total (>10 y/o)  | 45–54 |                 |                  |       |                 |                  |       |                 |                  |       |
| 1983–1987       | 64.2            | 42.4             | 139.5 | 19.0            | 80.8             | 159.8 | 35.4            | 18.1             | 127.4 | 5.4             | 19.9             | 115.5 |
| 1988–1992       | 48.4            | 30.0             | 132.1 | 12.0            | 52.9             | 153.9 | 30.4            | 14.1             | 120.2 | 4.0             | 16.2             | 110.9 |
| 1993–1997       | 52.0            | 30.6             | 134.5 | 13.8            | 53.8             | 146.9 | 28.6            | 12.6             | 128.7 | 2.8             | 12.5             | 97.1  |
| 1998–2002       | 75.0            | 44.4             | 133.6 | 17.2            | 66.8             | 119.4 | 31.6            | 13.7             | 124.0 | 2.8             | 13.3             | 88.2  |
| 2003–2007       | 89.6            | 52.9             | 161.7 | 22.6            | 94.7             | 169.3 | 28.4            | 14.3             | 121.1 | 4.2             | 16.8             | 122.2 |
| 2008–2012       | 64.0            | 41.0             | 128.8 | 11.6            | 58.1             | 119.6 | 24.8            | 13.1             | 112.2 | 2.4             | 13.7             | 92.1  |
|                 | 15–24           |                  |       | 55–64           |                  |       | 15–24           |                  |       | 55–64           |                  |       |
| 1983–1987       | 3.0             | 16.3             | 117.0 | 10.8            | 51.6             | 121.3 | 1.8             | 8.5              | 123.9 | 8.0             | 28.2             | 143.1 |
| 1988–1992       | 1.8             | 10.1             | 102.3 | 11.2            | 48.0             | 135.1 | 1.0             | 5.5              | 104.9 | 7.2             | 24.3             | 136.2 |
| 1993–1997       | 0.6             | 7.6              | 67.0  | 13.0            | 57.2             | 142.1 | 1.0             | 5.6              | 106.9 | 6.0             | 21.6             | 136.1 |
| 1998–2002       | 3.6             | 19.0             | 120.3 | 16.4            | 79.7             | 125.4 | 0.8             | 6.4              | 90.6  | 4.4             | 19.3             | 102.6 |
| 2003–2007       | 2.2             | 16.5             | 94.5  | 21.4            | 90.9             | 157.4 | 1.8             | 11.4             | 126.5 | 4.2             | 17.7             | 105.9 |
| 2008–2012       | 3.6             | 25.5             | 120.4 | 17.6            | 66.6             | 137.1 | 0.0             | 5.5              | 56.3  | 4.0             | 16.0             | 107.1 |
|                 | 25–34           |                  |       | 65–74           |                  |       | 25–34           |                  |       | 65–74           |                  |       |
| 1983–1987       | 7.4             | 30.8             | 120.6 | 6.6             | 51.8             | 118.4 | 2.6             | 11.4             | 105.5 | 6.4             | 36.7             | 117.4 |
| 1988–1992       | 3.2             | 17.6             | 92.2  | 7.2             | 47.4             | 134.6 | 1.4             | 8.0              | 92.2  | 4.8             | 24.9             | 95.3  |
| 1993–1997       | 3.8             | 21.2             | 108.3 | 9.0             | 47.9             | 150.2 | 1.8             | 9.3              | 111.7 | 5.4             | 22.4             | 115.1 |
| 1998–2002       | 7.4             | 36.1             | 133.8 | 9.8             | 50.2             | 110.4 | 2.2             | 12.3             | 105.9 | 8.6             | 31.2             | 148.5 |
| 2003–2007       | 10.4            | 50.4             | 162.5 | 11.4            | 57.8             | 134.7 | 2.4             | 14.0             | 107.5 | 5.8             | 22.8             | 122.5 |
| 2008–2012       | 7.2             | 41.8             | 128.3 | 7.8             | 44.0             | 111.4 | 2.8             | 17.0             | 119.0 | 3.8             | 18.0             | 100.9 |
|                 | 35–44           |                  |       | >74 y/o         |                  |       | 35–44           |                  |       | >74 y/o         |                  |       |
| 1983–1987       | 10.4            | 41.6             | 130.7 | 6.8             | 104.0            | 132.8 | 2.6             | 11.5             | 97.1  | 8.6             | 78.8             | 136.6 |
| 1988–1992       | 5.8             | 23.3             | 98.2  | 7.2             | 86.3             | 133.8 | 1.6             | 8.1              | 83.8  | 10.4            | 71.3             | 149.1 |
| 1993–1997       | 6.2             | 26.3             | 107.5 | 5.4             | 57.8             | 110.9 | 2.2             | 9.3              | 109.5 | 9.4             | 52.9             | 153.6 |
| 1998–2002       | 9.8             | 45.9             | 130.3 | 10.4            | 83.9             | 159.2 | 1.8             | 9.8              | 94.6  | 11.0            | 49.3             | 158.8 |
| 2003–2007       | 11.4            | 59.3             | 147.9 | 10.0            | 64.4             | 142.9 | 2.6             | 13.7             | 108.8 | 7.4             | 27.3             | 121.8 |
| 2008–2012       | 6.6             | 38.2             | 102.6 | 9.4             | 52.3             | 126.0 | 2.8             | 15.0             | 110.5 | 9.0             | 27.5             | 142.9 |

Secondary Medical Zone ID: 053

|           | Male            |                  |       |                 |                  |       | Female          |                  |       |                 |                  |       |
|-----------|-----------------|------------------|-------|-----------------|------------------|-------|-----------------|------------------|-------|-----------------|------------------|-------|
|           | Suicide         |                  |       | Suicide         |                  |       | Suicide         |                  |       | Suicide         |                  |       |
|           | Num<br>per year | Rate<br>/100,000 | × 100 | Num<br>per year | Rate<br>/100,000 | × 100 | Num<br>per year | Rate<br>/100,000 | × 100 | Num<br>per year | Rate<br>/100,000 | × 100 |
|           |                 |                  |       |                 |                  |       |                 |                  |       |                 |                  |       |
|           | Total (>10 y/o) |                  |       | 45–54           |                  |       | Total (>10 y/o) |                  |       | 45–54           |                  |       |
| 1983–1987 | 60.8            | 30.9             | 92.4  | 12.8            | 41.7             | 82.5  | 38.2            | 15.7             | 104.6 | 4.2             | 13.9             | 80.4  |
| 1988–1992 | 53.0            | 24.5             | 98.3  | 12.4            | 37.9             | 110.3 | 30.6            | 11.7             | 91.6  | 3.6             | 12.3             | 84.0  |
| 1993–1997 | 52.0            | 23.4             | 89.6  | 11.2            | 31.8             | 87.0  | 29.8            | 10.4             | 98.3  | 4.0             | 11.8             | 91.2  |
| 1998–2002 | 81.4            | 34.4             | 93.8  | 19.0            | 49.7             | 88.8  | 34.4            | 11.7             | 95.6  | 6.6             | 16.6             | 110.2 |
| 2003–2007 | 96.4            | 40.9             | 109.3 | 21.0            | 58.7             | 105.0 | 35.2            | 12.5             | 101.2 | 4.6             | 13.2             | 96.7  |
| 2008–2012 | 80.8            | 34.8             | 100.6 | 14.4            | 47.1             | 97.0  | 35.0            | 13.4             | 102.6 | 5.8             | 17.4             | 116.6 |
|           | 15–24           |                  |       | 55–64           |                  |       | 15–24           |                  |       | 55–64           |                  |       |
| 1983–1987 | 5.2             | 16.5             | 118.3 | 7.6             | 30.1             | 70.7  | 2.2             | 6.8              | 99.8  | 6.8             | 20.8             | 105.6 |
| 1988–1992 | 5.2             | 13.6             | 137.3 | 6.8             | 24.1             | 67.9  | 1.8             | 5.2              | 99.4  | 4.0             | 13.4             | 75.3  |
| 1993–1997 | 4.0             | 11.6             | 102.8 | 11.2            | 37.2             | 92.5  | 1.4             | 4.5              | 85.7  | 4.4             | 13.9             | 87.6  |
| 1998–2002 | 4.6             | 15.2             | 95.9  | 16.0            | 53.3             | 83.9  | 1.0             | 4.7              | 67.2  | 5.4             | 17.3             | 91.9  |
| 2003–2007 | 5.8             | 20.0             | 114.4 | 19.0            | 54.7             | 94.8  | 2.6             | 9.3              | 102.9 | 7.8             | 20.2             | 120.4 |
| 2008–2012 | 5.4             | 22.3             | 105.4 | 16.4            | 44.1             | 90.8  | 3.2             | 12.2             | 125.7 | 6.2             | 15.9             | 106.3 |
|           | 25–34           |                  |       | 65–74           |                  |       | 25–34           |                  |       | 65–74           |                  |       |
| 1983–1987 | 9.8             | 28.0             | 109.4 | 5.6             | 38.5             | 87.9  | 4.0             | 11.2             | 104.4 | 6.2             | 30.8             | 98.5  |
| 1988–1992 | 6.4             | 20.5             | 107.3 | 7.2             | 37.5             | 106.4 | 1.4             | 6.1              | 69.8  | 7.2             | 28.5             | 109.3 |
| 1993–1997 | 6.6             | 21.4             | 109.5 | 6.2             | 26.6             | 83.4  | 2.2             | 7.7              | 92.6  | 4.8             | 16.7             | 85.6  |
| 1998–2002 | 8.8             | 27.7             | 102.6 | 10.2            | 38.7             | 85.2  | 2.6             | 9.6              | 82.7  | 5.8             | 18.6             | 88.4  |
| 2003–2007 | 12.6            | 38.3             | 123.5 | 10.2            | 38.4             | 89.5  | 3.8             | 12.6             | 96.9  | 5.2             | 17.0             | 91.2  |
| 2008–2012 | 10.4            | 36.7             | 112.5 | 9.4             | 35.7             | 90.4  | 3.4             | 13.4             | 93.5  | 4.8             | 16.4             | 92.0  |
|           | 35–44           |                  |       | >74 y/o         |                  |       | 35–44           |                  |       | >74 y/o         |                  |       |
| 1983–1987 | 13.8            | 36.5             | 114.6 | 6.0             | 70.4             | 89.9  | 4.6             | 12.4             | 105.4 | 10.2            | 75.8             | 131.5 |
| 1988–1992 | 9.8             | 24.8             | 104.6 | 5.0             | 50.0             | 77.6  | 3.8             | 9.9              | 102.4 | 8.6             | 50.4             | 105.4 |
| 1993–1997 | 9.8             | 26.7             | 108.8 | 3.0             | 28.4             | 54.6  | 3.2             | 8.8              | 103.9 | 9.8             | 45.3             | 131.5 |
| 1998–2002 | 13.6            | 40.9             | 116.1 | 9.0             | 55.6             | 105.6 | 2.2             | 8.1              | 78.3  | 10.6            | 38.1             | 122.8 |
| 2003–2007 | 18.8            | 58.6             | 146.3 | 8.6             | 41.6             | 92.3  | 2.6             | 10.1             | 80.0  | 8.4             | 24.2             | 107.7 |
| 2008–2012 | 12.2            | 39.0             | 104.8 | 12.2            | 47.2             | 113.8 | 4.0             | 13.2             | 97.2  | 7.6             | 18.7             | 97.3  |

Secondary Medical Zone ID: 054

|           | Male            |          |       |          |          |       | Female          |          |       |          |          |       |
|-----------|-----------------|----------|-------|----------|----------|-------|-----------------|----------|-------|----------|----------|-------|
|           | Suicide         |          |       | Suicide  |          |       | Suicide         |          |       | Suicide  |          |       |
|           | Num             | Rate     | × 100 | Num      | Rate     | × 100 | Num             | Rate     | × 100 | Num      | Rate     | × 100 |
|           | per year        | /100,000 |       | per year | /100,000 |       | per year        | /100,000 |       | per year | /100,000 |       |
|           | Total (>10 y/o) |          |       | 45–54    |          |       | Total (>10 y/o) |          |       | 45–54    |          |       |
| 1983–1987 | 70.4            | 33.8     | 105.3 | 15.0     | 48.0     | 94.9  | 39.4            | 16.3     | 108.9 | 5.2      | 15.9     | 92.2  |
| 1988–1992 | 56.2            | 24.9     | 102.2 | 9.2      | 29.4     | 85.5  | 42.4            | 14.7     | 123.5 | 6.6      | 18.1     | 124.0 |
| 1993–1997 | 63.6            | 25.9     | 104.1 | 12.0     | 32.4     | 88.5  | 32.0            | 10.7     | 103.8 | 5.2      | 13.9     | 108.0 |
| 1998–2002 | 93.0            | 36.1     | 100.5 | 21.8     | 51.6     | 92.2  | 38.2            | 12.4     | 102.4 | 4.2      | 12.0     | 79.6  |
| 2003–2007 | 126.4           | 46.1     | 130.6 | 34.6     | 81.9     | 146.5 | 39.8            | 13.1     | 107.7 | 5.0      | 13.0     | 94.8  |
| 2008–2012 | 102.0           | 38.2     | 113.7 | 20.0     | 53.5     | 110.2 | 41.6            | 13.3     | 111.7 | 6.6      | 17.2     | 115.5 |
|           | 15–24           |          |       | 55–64    |          |       | 15–24           |          |       | 55–64    |          |       |
| 1983–1987 | 7.8             | 20.3     | 145.7 | 10.2     | 38.8     | 91.3  | 1.8             | 5.9      | 86.8  | 7.6      | 23.3     | 118.3 |
| 1988–1992 | 5.0             | 12.2     | 123.1 | 11.6     | 37.8     | 106.5 | 1.0             | 3.8      | 71.4  | 7.2      | 20.3     | 113.7 |
| 1993–1997 | 6.0             | 13.9     | 123.3 | 13.0     | 42.5     | 105.5 | 1.6             | 4.7      | 90.3  | 4.2      | 13.5     | 84.8  |
| 1998–2002 | 6.2             | 16.2     | 102.8 | 17.6     | 57.8     | 91.0  | 2.6             | 7.4      | 104.8 | 7.0      | 20.7     | 109.8 |
| 2003–2007 | 6.2             | 18.0     | 102.9 | 24.6     | 66.6     | 115.4 | 3.6             | 10.8     | 120.1 | 6.0      | 16.9     | 100.8 |
| 2008–2012 | 6.2             | 21.2     | 100.1 | 23.6     | 55.8     | 115.0 | 1.6             | 7.3      | 75.6  | 6.2      | 15.3     | 102.9 |
|           | 25–34           |          |       | 65–74    |          |       | 25–34           |          |       | 65–74    |          |       |
| 1983–1987 | 10.2            | 25.5     | 99.6  | 7.0      | 47.7     | 108.9 | 4.2             | 10.6     | 98.5  | 7.8      | 38.1     | 121.9 |
| 1988–1992 | 7.6             | 20.5     | 107.1 | 7.2      | 38.9     | 110.5 | 3.2             | 8.8      | 101.1 | 10.4     | 40.5     | 155.3 |
| 1993–1997 | 9.4             | 25.0     | 127.8 | 7.2      | 31.3     | 98.0  | 2.2             | 7.1      | 84.8  | 4.6      | 16.6     | 85.2  |
| 1998–2002 | 11.0            | 29.2     | 108.1 | 12.2     | 46.2     | 101.7 | 4.2             | 11.8     | 101.7 | 6.0      | 19.2     | 91.6  |
| 2003–2007 | 18.0            | 44.8     | 144.3 | 14.4     | 52.4     | 122.0 | 4.6             | 13.0     | 100.1 | 7.6      | 22.5     | 120.8 |
| 2008–2012 | 14.4            | 40.4     | 123.9 | 9.6      | 36.8     | 93.2  | 4.4             | 13.9     | 97.4  | 5.6      | 18.3     | 102.6 |
|           | 35–44           |          |       | >74 y/o  |          |       | 35–44           |          |       | >74 y/o  |          |       |
| 1983–1987 | 16.0            | 40.2     | 126.2 | 4.0      | 61.2     | 78.2  | 4.8             | 12.8     | 108.3 | 8.0      | 66.1     | 114.6 |
| 1988–1992 | 11.4            | 26.2     | 110.3 | 4.2      | 49.8     | 77.3  | 3.2             | 8.5      | 88.4  | 10.6     | 64.5     | 134.8 |
| 1993–1997 | 10.8            | 25.6     | 104.5 | 4.8      | 44.2     | 84.9  | 4.0             | 9.5      | 112.1 | 10.0     | 47.8     | 138.9 |
| 1998–2002 | 17.4            | 43.8     | 124.2 | 6.8      | 47.4     | 90.0  | 3.0             | 8.8      | 84.9  | 11.2     | 41.9     | 134.9 |
| 2003–2007 | 19.0            | 51.5     | 128.5 | 9.6      | 48.6     | 108.0 | 4.0             | 11.8     | 93.8  | 9.0      | 26.4     | 117.6 |
| 2008–2012 | 16.2            | 43.4     | 116.7 | 11.8     | 48.5     | 116.9 | 5.4             | 14.8     | 109.2 | 11.8     | 27.7     | 144.1 |

Secondary Medical Zone ID: 055

|                 | Male            |                  |       |                 |                  |       | Female          |                  |       |                 |                  |       |
|-----------------|-----------------|------------------|-------|-----------------|------------------|-------|-----------------|------------------|-------|-----------------|------------------|-------|
|                 | Suicide         |                  |       | Suicide         |                  |       | Suicide         |                  |       | Suicide         |                  |       |
|                 | Num<br>per year | Rate<br>/100,000 | × 100 | Num<br>per year | Rate<br>/100,000 | × 100 | Num<br>per year | Rate<br>/100,000 | × 100 | Num<br>per year | Rate<br>/100,000 | × 100 |
|                 |                 |                  |       |                 |                  |       |                 |                  |       |                 |                  |       |
| Total (>10 y/o) | 45–54           | Total (>10 y/o)  | 45–54 |                 |                  |       |                 |                  |       |                 |                  |       |
| 1983–1987       | 24.4            | 37.3             | 122.2 | 4.6             | 51.3             | 101.5 | 10.4            | 15.0             | 97.7  | 1.6             | 17.0             | 98.6  |
| 1988–1992       | 16.6            | 25.1             | 103.8 | 2.4             | 30.3             | 88.2  | 10.8            | 13.2             | 105.7 | 1.8             | 16.5             | 113.1 |
| 1993–1997       | 19.0            | 26.1             | 107.9 | 3.6             | 35.4             | 96.8  | 13.0            | 12.4             | 132.1 | 1.8             | 15.0             | 116.1 |
| 1998–2002       | 30.2            | 38.4             | 113.7 | 6.6             | 54.9             | 98.0  | 13.4            | 13.4             | 118.1 | 1.4             | 14.3             | 94.9  |
| 2003–2007       | 35.0            | 42.7             | 126.9 | 10.0            | 76.7             | 137.1 | 12.0            | 13.3             | 111.9 | 1.6             | 14.0             | 102.2 |
| 2008–2012       | 28.0            | 36.3             | 110.0 | 5.0             | 48.4             | 99.6  | 11.8            | 13.3             | 110.5 | 1.0             | 13.1             | 87.8  |
|                 | 15–24           |                  |       | 55–64           |                  |       | 15–24           |                  |       | 55–64           |                  |       |
| 1983–1987       | 4.2             | 30.6             | 219.7 | 3.2             | 40.2             | 94.7  | 0.4             | 6.3              | 92.4  | 2.0             | 20.0             | 101.5 |
| 1988–1992       | 1.0             | 10.4             | 105.2 | 4.2             | 41.5             | 116.8 | 0.6             | 5.8              | 110.2 | 1.2             | 15.1             | 84.4  |
| 1993–1997       | 0.6             | 9.8              | 86.4  | 3.8             | 42.0             | 104.2 | 0.2             | 4.4              | 83.6  | 1.2             | 14.4             | 90.4  |
| 1998–2002       | 3.8             | 25.4             | 160.9 | 7.0             | 74.1             | 116.7 | 1.0             | 8.3              | 118.7 | 2.0             | 20.2             | 107.4 |
| 2003–2007       | 2.4             | 21.5             | 123.4 | 6.6             | 62.5             | 108.3 | 0.6             | 8.6              | 95.6  | 3.0             | 21.7             | 129.4 |
| 2008–2012       | 1.6             | 21.7             | 102.4 | 5.6             | 47.8             | 98.4  | 0.6             | 9.5              | 98.0  | 2.4             | 17.2             | 115.6 |
|                 | 25–34           |                  |       | 65–74           |                  |       | 25–34           |                  |       | 65–74           |                  |       |
| 1983–1987       | 4.6             | 34.1             | 133.5 | 2.6             | 50.2             | 114.8 | 0.8             | 9.3              | 86.8  | 2.0             | 31.5             | 100.8 |
| 1988–1992       | 2.2             | 20.5             | 107.5 | 1.6             | 31.8             | 90.3  | 1.0             | 9.2              | 106.5 | 2.0             | 26.3             | 100.8 |
| 1993–1997       | 2.0             | 20.5             | 104.9 | 2.6             | 34.5             | 108.0 | 1.2             | 10.0             | 120.2 | 2.4             | 23.2             | 118.9 |
| 1998–2002       | 2.6             | 27.5             | 101.7 | 3.2             | 42.5             | 93.4  | 0.6             | 10.2             | 88.3  | 2.2             | 21.6             | 102.6 |
| 2003–2007       | 4.0             | 36.6             | 118.0 | 3.0             | 40.6             | 94.6  | 1.2             | 13.4             | 103.1 | 2.2             | 20.8             | 111.7 |
| 2008–2012       | 3.8             | 36.6             | 112.3 | 3.8             | 44.5             | 112.6 | 1.6             | 16.1             | 112.1 | 2.0             | 20.0             | 112.6 |
|                 | 35–44           |                  |       | >74 y/o         |                  |       | 35–44           |                  |       | >74 y/o         |                  |       |
| 1983–1987       | 3.4             | 32.8             | 103.0 | 1.8             | 75.6             | 96.5  | 1.4             | 13.0             | 109.9 | 2.2             | 54.9             | 95.1  |
| 1988–1992       | 3.4             | 26.3             | 111.1 | 1.6             | 57.5             | 89.2  | 0.8             | 8.9              | 92.3  | 3.4             | 59.2             | 123.6 |
| 1993–1997       | 3.6             | 27.9             | 113.7 | 2.6             | 63.6             | 122.2 | 1.0             | 8.7              | 102.4 | 5.0             | 65.0             | 189.0 |
| 1998–2002       | 3.4             | 33.2             | 94.3  | 3.6             | 68.4             | 129.7 | 1.2             | 11.0             | 106.0 | 5.0             | 52.2             | 168.1 |
| 2003–2007       | 4.8             | 47.3             | 118.1 | 4.2             | 59.9             | 132.9 | 1.0             | 12.3             | 97.1  | 2.4             | 22.6             | 100.6 |
| 2008–2012       | 4.4             | 41.9             | 112.6 | 3.6             | 46.5             | 112.2 | 0.8             | 12.4             | 91.6  | 3.4             | 24.3             | 126.5 |



Secondary Medical Zone ID: 056

|                 | Male            |                  |       |                 |                  |       | Female          |                  |       |                 |                  |       |
|-----------------|-----------------|------------------|-------|-----------------|------------------|-------|-----------------|------------------|-------|-----------------|------------------|-------|
|                 | Suicide         |                  |       | Suicide         |                  |       | Suicide         |                  |       | Suicide         |                  |       |
|                 | Num<br>per year | Rate<br>/100,000 | × 100 | Num<br>per year | Rate<br>/100,000 | × 100 | Num<br>per year | Rate<br>/100,000 | × 100 | Num<br>per year | Rate<br>/100,000 | × 100 |
|                 |                 |                  |       |                 |                  |       |                 |                  |       |                 |                  |       |
| Total (>10 y/o) | 45–54           | Total (>10 y/o)  | 45–54 |                 |                  |       |                 |                  |       |                 |                  |       |
| 1983–1987       | 52.2            | 38.9             | 124.7 | 14.6            | 69.1             | 136.7 | 23.6            | 14.8             | 97.2  | 4.4             | 18.8             | 109.2 |
| 1988–1992       | 29.2            | 23.2             | 90.1  | 7.6             | 39.8             | 115.8 | 18.6            | 11.3             | 85.3  | 2.4             | 13.6             | 92.7  |
| 1993–1997       | 31.0            | 23.7             | 91.4  | 7.2             | 36.4             | 99.5  | 13.4            | 9.1              | 74.1  | 2.4             | 12.8             | 99.2  |
| 1998–2002       | 54.4            | 38.2             | 109.5 | 14.2            | 63.2             | 112.9 | 17.6            | 11.6             | 83.8  | 2.8             | 14.5             | 96.4  |
| 2003–2007       | 63.4            | 45.5             | 129.6 | 16.2            | 76.4             | 136.5 | 17.6            | 12.1             | 90.7  | 3.0             | 14.7             | 107.1 |
| 2008–2012       | 47.8            | 37.2             | 110.3 | 10.0            | 55.2             | 113.6 | 18.0            | 12.9             | 96.9  | 2.2             | 13.9             | 93.3  |
|                 | 15–24           |                  |       | 55–64           |                  |       | 15–24           |                  |       | 55–64           |                  |       |
| 1983–1987       | 2.6             | 15.6             | 111.7 | 8.6             | 44.3             | 104.4 | 0.4             | 4.9              | 71.4  | 4.6             | 19.9             | 100.9 |
| 1988–1992       | 1.4             | 9.7              | 97.8  | 6.2             | 31.8             | 89.4  | 0.6             | 4.6              | 88.0  | 4.6             | 19.0             | 106.3 |
| 1993–1997       | 1.2             | 9.7              | 85.6  | 7.4             | 39.9             | 99.1  | 0.4             | 4.1              | 78.6  | 2.0             | 11.7             | 73.5  |
| 1998–2002       | 2.4             | 15.9             | 100.4 | 10.6            | 62.2             | 97.8  | 0.8             | 6.4              | 90.8  | 2.8             | 16.7             | 88.8  |
| 2003–2007       | 3.2             | 20.5             | 117.4 | 12.6            | 65.3             | 113.1 | 1.2             | 9.1              | 101.1 | 3.0             | 16.5             | 98.7  |
| 2008–2012       | 2.8             | 22.8             | 107.5 | 11.8            | 54.1             | 111.4 | 1.4             | 11.0             | 113.5 | 4.4             | 18.4             | 123.7 |
|                 | 25–34           |                  |       | 65–74           |                  |       | 25–34           |                  |       | 65–74           |                  |       |
| 1983–1987       | 8.0             | 35.5             | 138.7 | 5.4             | 46.8             | 106.9 | 1.8             | 9.8              | 91.3  | 4.4             | 29.6             | 94.6  |
| 1988–1992       | 3.2             | 18.5             | 96.7  | 2.4             | 22.6             | 64.1  | 1.4             | 8.4              | 96.5  | 3.8             | 22.0             | 84.1  |
| 1993–1997       | 3.6             | 21.6             | 110.5 | 3.8             | 25.4             | 79.6  | 1.4             | 8.6              | 103.5 | 3.0             | 15.4             | 79.0  |
| 1998–2002       | 5.4             | 32.2             | 119.3 | 8.8             | 49.3             | 108.4 | 2.0             | 12.5             | 108.0 | 3.8             | 18.3             | 87.2  |
| 2003–2007       | 6.4             | 39.4             | 127.1 | 8.8             | 51.4             | 119.9 | 1.4             | 11.8             | 90.8  | 1.6             | 11.8             | 63.2  |
| 2008–2012       | 4.6             | 34.3             | 105.2 | 7.4             | 46.6             | 118.1 | 2.0             | 15.3             | 106.7 | 2.6             | 16.2             | 91.1  |
|                 | 35–44           |                  |       | >74 y/o         |                  |       | 35–44           |                  |       | >74 y/o         |                  |       |
| 1983–1987       | 8.0             | 37.8             | 118.7 | 5.0             | 87.2             | 111.4 | 2.6             | 12.8             | 108.2 | 5.2             | 53.1             | 92.1  |
| 1988–1992       | 5.2             | 23.6             | 99.8  | 3.0             | 47.1             | 73.1  | 0.4             | 6.0              | 61.7  | 5.4             | 41.8             | 87.3  |
| 1993–1997       | 4.2             | 21.3             | 86.8  | 3.6             | 43.5             | 83.6  | 0.8             | 6.2              | 72.5  | 3.4             | 22.7             | 65.9  |
| 1998–2002       | 6.6             | 36.1             | 102.5 | 6.2             | 56.0             | 106.2 | 1.4             | 9.2              | 88.7  | 4.0             | 21.1             | 67.9  |
| 2003–2007       | 10.0            | 58.6             | 146.3 | 6.2             | 45.4             | 100.9 | 2.0             | 12.8             | 101.4 | 5.4             | 21.7             | 96.5  |
| 2008–2012       | 6.0             | 40.5             | 108.9 | 5.2             | 35.5             | 85.6  | 1.2             | 11.6             | 85.4  | 4.2             | 15.5             | 80.7  |

Secondary Medical Zone ID: 057

|           | Male            |          |       |          |          |       | Female          |          |       |          |          |       |
|-----------|-----------------|----------|-------|----------|----------|-------|-----------------|----------|-------|----------|----------|-------|
|           | Suicide         |          |       | Suicide  |          |       | Suicide         |          |       | Suicide  |          |       |
|           | Num             | Rate     | × 100 | Num      | Rate     | × 100 | Num             | Rate     | × 100 | Num      | Rate     | × 100 |
|           | per year        | /100,000 |       | per year | /100,000 |       | per year        | /100,000 |       | per year | /100,000 |       |
|           | Total (>10 y/o) |          |       | 45–54    |          |       | Total (>10 y/o) |          |       | 45–54    |          |       |
| 1983–1987 | 7.4             | 33.8     | 113.4 | 0.6      | 39.0     | 77.1  | 5.2             | 16.6     | 120.3 | 0.6      | 17.7     | 102.6 |
| 1988–1992 | 6.0             | 26.2     | 116.5 | 0.6      | 31.5     | 91.7  | 3.8             | 13.1     | 108.6 | 0.2      | 13.8     | 94.7  |
| 1993–1997 | 6.0             | 26.3     | 115.5 | 1.4      | 40.9     | 111.8 | 3.2             | 10.9     | 108.8 | 0.0      | 11.6     | 89.6  |
| 1998–2002 | 7.4             | 36.6     | 108.6 | 1.6      | 58.2     | 104.0 | 2.4             | 12.3     | 94.2  | 0.6      | 16.3     | 108.3 |
| 2003–2007 | 10.0            | 41.4     | 138.9 | 2.0      | 66.4     | 118.8 | 4.2             | 13.2     | 120.4 | 0.4      | 14.3     | 104.1 |
| 2008–2012 | 7.8             | 37.3     | 121.1 | 1.4      | 52.7     | 108.5 | 2.4             | 12.7     | 101.8 | 0.2      | 14.6     | 97.6  |
|           | 15–24           |          |       | 55–64    |          |       | 15–24           |          |       | 55–64    |          |       |
| 1983–1987 | 0.2             | 13.5     | 96.6  | 1.2      | 42.7     | 100.6 | 0.0             | 6.3      | 92.4  | 1.0      | 22.1     | 112.1 |
| 1988–1992 | 0.4             | 11.0     | 110.9 | 1.6      | 41.4     | 116.6 | 0.0             | 4.9      | 93.6  | 0.4      | 16.9     | 94.4  |
| 1993–1997 | 0.0             | 10.5     | 92.8  | 1.2      | 41.2     | 102.4 | 0.0             | 4.9      | 93.9  | 0.4      | 15.5     | 97.5  |
| 1998–2002 | 0.6             | 18.0     | 114.2 | 1.0      | 57.1     | 89.8  | 0.0             | 6.6      | 94.4  | 0.2      | 17.4     | 92.7  |
| 2003–2007 | 0.0             | 16.2     | 92.7  | 2.0      | 66.0     | 114.3 | 0.2             | 9.6      | 107.0 | 0.6      | 17.8     | 106.3 |
| 2008–2012 | 1.0             | 27.0     | 127.3 | 1.6      | 52.3     | 107.7 | 0.0             | 9.1      | 93.9  | 0.4      | 15.2     | 102.2 |
|           | 25–34           |          |       | 65–74    |          |       | 25–34           |          |       | 65–74    |          |       |
| 1983–1987 | 1.8             | 36.3     | 142.2 | 1.2      | 50.8     | 116.0 | 0.0             | 9.4      | 87.0  | 1.2      | 36.8     | 117.9 |
| 1988–1992 | 1.0             | 25.0     | 130.6 | 0.6      | 33.8     | 95.8  | 0.4             | 9.9      | 113.8 | 1.2      | 31.8     | 121.8 |
| 1993–1997 | 0.6             | 21.6     | 110.4 | 0.8      | 32.5     | 101.9 | 0.2             | 8.6      | 103.8 | 0.4      | 17.6     | 90.4  |
| 1998–2002 | 0.4             | 26.7     | 98.8  | 0.8      | 41.3     | 90.8  | 0.0             | 10.8     | 93.3  | 0.6      | 20.7     | 98.7  |
| 2003–2007 | 0.8             | 34.2     | 110.1 | 1.8      | 51.7     | 120.6 | 0.4             | 14.3     | 109.7 | 0.2      | 16.4     | 88.3  |
| 2008–2012 | 0.8             | 35.7     | 109.6 | 1.4      | 45.1     | 114.2 | 0.0             | 13.5     | 94.4  | 0.4      | 17.7     | 99.4  |
|           | 35–44           |          |       | >74 y/o  |          |       | 35–44           |          |       | >74 y/o  |          |       |
| 1983–1987 | 0.6             | 29.9     | 94.1  | 1.8      | 109.2    | 139.4 | 0.4             | 12.4     | 105.3 | 2.0      | 87.2     | 151.1 |
| 1988–1992 | 1.2             | 29.0     | 122.4 | 0.6      | 58.1     | 90.1  | 0.4             | 10.4     | 107.8 | 1.2      | 51.4     | 107.5 |
| 1993–1997 | 0.8             | 26.7     | 108.8 | 1.2      | 63.6     | 122.1 | 0.0             | 7.6      | 89.1  | 2.2      | 60.5     | 175.7 |
| 1998–2002 | 1.0             | 38.0     | 108.0 | 2.0      | 75.2     | 142.7 | 0.2             | 10.4     | 100.6 | 0.8      | 28.0     | 90.2  |
| 2003–2007 | 2.0             | 58.5     | 146.1 | 1.4      | 52.4     | 116.3 | 0.2             | 12.6     | 100.1 | 2.2      | 39.9     | 178.0 |
| 2008–2012 | 1.0             | 40.4     | 108.7 | 0.6      | 35.9     | 86.4  | 0.0             | 12.7     | 93.8  | 1.4      | 24.8     | 128.8 |

Secondary Medical Zone ID: 058

|           | Male            |                  |       |                 |                  |       | Female          |                  |       |                 |                  |       |
|-----------|-----------------|------------------|-------|-----------------|------------------|-------|-----------------|------------------|-------|-----------------|------------------|-------|
|           | Suicide         |                  |       | Suicide         |                  |       | Suicide         |                  |       | Suicide         |                  |       |
|           | Num<br>per year | Rate<br>/100,000 | × 100 | Num<br>per year | Rate<br>/100,000 | × 100 | Num<br>per year | Rate<br>/100,000 | × 100 | Num<br>per year | Rate<br>/100,000 | × 100 |
|           |                 |                  |       |                 |                  |       |                 |                  |       |                 |                  |       |
|           | Total (>10 y/o) |                  |       | 45–54           |                  |       | Total (>10 y/o) |                  |       | 45–54           |                  |       |
| 1983–1987 | 34.4            | 37.3             | 120.4 | 8.8             | 63.4             | 125.5 | 18.8            | 17.0             | 116.4 | 3.6             | 21.5             | 124.5 |
| 1988–1992 | 28.8            | 28.1             | 123.8 | 5.0             | 37.6             | 109.4 | 16.6            | 13.7             | 112.5 | 1.6             | 13.9             | 94.8  |
| 1993–1997 | 25.2            | 25.3             | 103.1 | 6.8             | 41.7             | 114.0 | 13.2            | 10.9             | 103.3 | 1.6             | 12.4             | 96.3  |
| 1998–2002 | 46.0            | 42.1             | 126.1 | 10.8            | 62.7             | 112.0 | 18.2            | 13.5             | 117.2 | 3.6             | 18.9             | 125.5 |
| 2003–2007 | 39.2            | 38.6             | 109.4 | 6.8             | 47.2             | 84.5  | 15.0            | 12.4             | 106.2 | 2.2             | 14.4             | 105.1 |
| 2008–2012 | 33.8            | 35.0             | 103.0 | 3.6             | 35.5             | 73.1  | 12.8            | 12.0             | 97.6  | 1.4             | 13.4             | 89.7  |
|           | 15–24           |                  |       | 55–64           |                  |       | 15–24           |                  |       | 55–64           |                  |       |
| 1983–1987 | 3.0             | 20.5             | 146.9 | 6.0             | 47.6             | 112.1 | 0.4             | 5.7              | 83.5  | 2.2             | 17.4             | 88.1  |
| 1988–1992 | 1.0             | 9.4              | 95.0  | 5.2             | 38.7             | 109.0 | 0.8             | 5.9              | 110.9 | 3.4             | 20.5             | 114.8 |
| 1993–1997 | 1.6             | 11.9             | 104.8 | 4.8             | 39.1             | 97.0  | 0.0             | 3.4              | 64.4  | 3.0             | 19.0             | 119.8 |
| 1998–2002 | 2.6             | 18.5             | 117.1 | 9.4             | 72.9             | 114.8 | 0.4             | 5.9              | 83.3  | 2.6             | 19.6             | 104.4 |
| 2003–2007 | 2.8             | 21.5             | 123.1 | 11.4            | 73.8             | 127.9 | 0.8             | 8.8              | 97.5  | 2.2             | 16.5             | 98.8  |
| 2008–2012 | 2.6             | 24.5             | 115.4 | 8.6             | 51.0             | 105.1 | 0.4             | 7.9              | 81.9  | 2.4             | 15.3             | 102.3 |
|           | 25–34           |                  |       | 65–74           |                  |       | 25–34           |                  |       | 65–74           |                  |       |
| 1983–1987 | 4.6             | 28.2             | 110.3 | 3.2             | 45.0             | 102.7 | 1.6             | 10.8             | 100.3 | 1.6             | 22.1             | 70.8  |
| 1988–1992 | 4.0             | 26.1             | 136.5 | 5.0             | 50.3             | 142.8 | 1.2             | 9.0              | 103.8 | 3.2             | 27.8             | 106.5 |
| 1993–1997 | 1.6             | 16.3             | 83.6  | 2.8             | 28.8             | 90.3  | 1.0             | 8.5              | 102.7 | 2.8             | 20.5             | 105.2 |
| 1998–2002 | 5.0             | 34.5             | 127.9 | 6.0             | 50.5             | 111.0 | 0.6             | 9.4              | 81.2  | 3.8             | 24.6             | 117.0 |
| 2003–2007 | 6.0             | 41.5             | 133.8 | 2.6             | 30.7             | 71.5  | 0.8             | 10.8             | 83.1  | 3.2             | 21.7             | 116.6 |
| 2008–2012 | 5.2             | 39.2             | 120.4 | 6.2             | 50.2             | 127.2 | 1.0             | 12.8             | 89.4  | 2.2             | 18.2             | 102.4 |
|           | 35–44           |                  |       | >74 y/o         |                  |       | 35–44           |                  |       | >74 y/o         |                  |       |
| 1983–1987 | 6.4             | 38.9             | 122.2 | 2.4             | 69.3             | 88.5  | 2.4             | 14.2             | 120.6 | 7.0             | 106.3            | 184.2 |
| 1988–1992 | 4.8             | 27.0             | 113.7 | 3.8             | 75.7             | 117.3 | 2.0             | 11.1             | 114.7 | 4.4             | 54.5             | 114.0 |
| 1993–1997 | 3.8             | 24.3             | 99.1  | 3.8             | 62.7             | 120.4 | 1.2             | 8.4              | 98.4  | 3.6             | 36.4             | 105.8 |
| 1998–2002 | 7.4             | 49.2             | 139.6 | 4.8             | 64.0             | 121.3 | 1.8             | 12.0             | 116.1 | 5.4             | 41.2             | 132.8 |
| 2003–2007 | 4.2             | 37.6             | 93.8  | 5.2             | 55.0             | 122.2 | 0.8             | 10.6             | 84.0  | 5.0             | 30.4             | 135.4 |
| 2008–2012 | 4.6             | 38.3             | 103.1 | 3.0             | 33.5             | 80.7  | 0.8             | 11.5             | 84.5  | 4.6             | 23.9             | 124.1 |

Secondary Medical Zone ID: 059

|                 | Male            |                  |       |                 |                  |       | Female          |                  |       |                 |                  |       |
|-----------------|-----------------|------------------|-------|-----------------|------------------|-------|-----------------|------------------|-------|-----------------|------------------|-------|
|                 | Suicide         |                  |       | Suicide         |                  |       | Suicide         |                  |       | Suicide         |                  |       |
|                 | Num<br>per year | Rate<br>/100,000 | × 100 | Num<br>per year | Rate<br>/100,000 | × 100 | Num<br>per year | Rate<br>/100,000 | × 100 | Num<br>per year | Rate<br>/100,000 | × 100 |
|                 |                 |                  |       |                 |                  |       |                 |                  |       |                 |                  |       |
| Total (>10 y/o) | 45–54           | Total (>10 y/o)  | 45–54 |                 |                  |       |                 |                  |       |                 |                  |       |
| 1983–1987       | 42.8            | 31.0             | 94.0  | 12.0            | 52.5             | 103.7 | 28.0            | 16.3             | 109.9 | 3.2             | 14.7             | 85.0  |
| 1988–1992       | 38.8            | 25.1             | 102.4 | 10.4            | 42.2             | 122.8 | 27.0            | 13.7             | 111.8 | 3.6             | 14.8             | 101.1 |
| 1993–1997       | 43.6            | 26.1             | 105.7 | 9.6             | 36.7             | 100.3 | 28.8            | 12.9             | 129.5 | 3.6             | 13.5             | 104.8 |
| 1998–2002       | 69.6            | 39.6             | 113.1 | 16.0            | 57.9             | 103.4 | 25.6            | 12.7             | 100.9 | 3.6             | 14.2             | 94.1  |
| 2003–2007       | 76.6            | 44.4             | 123.3 | 15.2            | 60.2             | 107.6 | 24.6            | 13.2             | 101.6 | 4.2             | 15.7             | 114.6 |
| 2008–2012       | 66.6            | 39.2             | 117.7 | 10.2            | 47.5             | 97.7  | 24.4            | 13.3             | 103.1 | 3.0             | 14.3             | 96.0  |
|                 | 15–24           |                  |       | 55–64           |                  |       | 15–24           |                  |       | 55–64           |                  |       |
| 1983–1987       | 2.0             | 11.4             | 82.1  | 6.2             | 34.7             | 81.6  | 1.4             | 6.7              | 98.2  | 5.4             | 22.6             | 114.4 |
| 1988–1992       | 1.8             | 9.0              | 90.6  | 7.4             | 34.6             | 97.4  | 1.6             | 6.3              | 119.2 | 5.4             | 20.9             | 117.0 |
| 1993–1997       | 3.0             | 12.3             | 108.5 | 10.8            | 47.5             | 117.9 | 1.2             | 5.4              | 102.7 | 3.4             | 14.8             | 92.8  |
| 1998–2002       | 2.8             | 14.3             | 90.7  | 17.0            | 73.6             | 115.8 | 1.6             | 7.6              | 107.9 | 3.6             | 16.6             | 88.2  |
| 2003–2007       | 5.0             | 23.0             | 131.6 | 16.2            | 63.6             | 110.2 | 2.8             | 13.0             | 144.4 | 4.0             | 16.1             | 96.3  |
| 2008–2012       | 4.8             | 26.3             | 124.0 | 14.6            | 53.6             | 110.4 | 1.8             | 10.9             | 112.9 | 3.4             | 13.7             | 92.2  |
|                 | 25–34           |                  |       | 65–74           |                  |       | 25–34           |                  |       | 65–74           |                  |       |
| 1983–1987       | 6.4             | 26.1             | 102.3 | 3.4             | 34.4             | 78.5  | 3.8             | 13.7             | 127.5 | 5.0             | 33.2             | 106.2 |
| 1988–1992       | 3.4             | 16.6             | 86.9  | 4.4             | 33.6             | 95.3  | 2.0             | 8.9              | 102.5 | 5.6             | 29.8             | 114.0 |
| 1993–1997       | 4.2             | 19.4             | 99.4  | 5.0             | 30.8             | 96.5  | 2.0             | 8.9              | 106.5 | 6.4             | 27.8             | 142.7 |
| 1998–2002       | 8.4             | 33.7             | 124.8 | 9.8             | 51.3             | 112.9 | 3.0             | 12.7             | 109.7 | 5.2             | 22.6             | 107.5 |
| 2003–2007       | 9.0             | 38.0             | 122.5 | 9.2             | 47.2             | 110.0 | 3.2             | 14.3             | 109.9 | 4.0             | 17.9             | 96.2  |
| 2008–2012       | 6.4             | 33.4             | 102.7 | 10.4            | 49.4             | 124.9 | 2.4             | 13.8             | 96.3  | 6.0             | 23.2             | 130.1 |
|                 | 35–44           |                  |       | >74 y/o         |                  |       | 35–44           |                  |       | >74 y/o         |                  |       |
| 1983–1987       | 7.4             | 29.1             | 91.3  | 4.8             | 88.9             | 113.5 | 3.4             | 12.5             | 106.2 | 5.8             | 69.5             | 120.5 |
| 1988–1992       | 6.2             | 22.7             | 95.9  | 5.2             | 71.3             | 110.5 | 3.0             | 10.5             | 108.4 | 5.8             | 49.9             | 104.2 |
| 1993–1997       | 7.8             | 29.1             | 118.7 | 3.2             | 40.7             | 78.1  | 4.2             | 13.5             | 158.4 | 8.0             | 50.8             | 147.7 |
| 1998–2002       | 10.6            | 43.8             | 124.3 | 4.8             | 46.6             | 88.4  | 2.2             | 10.1             | 97.3  | 6.4             | 33.1             | 106.7 |
| 2003–2007       | 15.6            | 65.4             | 163.3 | 6.2             | 45.3             | 100.6 | 2.4             | 11.9             | 94.2  | 4.0             | 17.7             | 78.9  |
| 2008–2012       | 13.2            | 51.8             | 139.3 | 6.8             | 42.3             | 102.0 | 3.6             | 15.2             | 112.3 | 4.2             | 16.0             | 83.1  |

Secondary Medical Zone ID: 060

|           | Male            |                  |       |                 |                  |       | Female          |                  |       |                 |                  |       |
|-----------|-----------------|------------------|-------|-----------------|------------------|-------|-----------------|------------------|-------|-----------------|------------------|-------|
|           | Suicide         |                  |       | Suicide         |                  |       | Suicide         |                  |       | Suicide         |                  |       |
|           | Num<br>per year | Rate<br>/100,000 | × 100 | Num<br>per year | Rate<br>/100,000 | × 100 | Num<br>per year | Rate<br>/100,000 | × 100 | Num<br>per year | Rate<br>/100,000 | × 100 |
|           |                 |                  |       |                 |                  |       |                 |                  |       |                 |                  |       |
|           | Total (>10 y/o) |                  |       | 45–54           |                  |       | Total (>10 y/o) |                  |       | 45–54           |                  |       |
| 1983–1987 | 61.4            | 33.5             | 105.3 | 12.2            | 44.0             | 87.1  | 32.2            | 15.7             | 103.9 | 5.0             | 17.6             | 102.0 |
| 1988–1992 | 44.2            | 23.1             | 92.3  | 10.6            | 34.2             | 99.6  | 33.8            | 14.0             | 115.0 | 6.6             | 19.0             | 129.9 |
| 1993–1997 | 52.2            | 24.6             | 98.3  | 12.8            | 36.4             | 99.4  | 23.2            | 9.9              | 89.4  | 4.8             | 13.7             | 105.9 |
| 1998–2002 | 76.0            | 34.5             | 95.1  | 18.2            | 51.0             | 91.2  | 32.2            | 13.0             | 100.5 | 5.2             | 14.9             | 98.7  |
| 2003–2007 | 88.0            | 39.5             | 106.7 | 19.2            | 58.0             | 103.7 | 34.8            | 13.5             | 109.0 | 4.8             | 14.4             | 105.2 |
| 2008–2012 | 77.0            | 34.9             | 100.4 | 14.2            | 47.9             | 98.5  | 36.4            | 14.5             | 112.7 | 5.0             | 16.3             | 109.2 |
|           | 15–24           |                  |       | 55–64           |                  |       | 15–24           |                  |       | 55–64           |                  |       |
| 1983–1987 | 5.8             | 18.2             | 130.6 | 9.4             | 43.0             | 101.3 | 1.8             | 6.3              | 91.5  | 6.0             | 22.8             | 115.6 |
| 1988–1992 | 4.8             | 12.8             | 129.0 | 8.0             | 32.0             | 90.3  | 2.0             | 5.7              | 108.6 | 6.0             | 20.8             | 116.2 |
| 1993–1997 | 4.8             | 13.3             | 117.8 | 9.6             | 36.3             | 90.2  | 1.8             | 5.4              | 103.3 | 4.4             | 15.8             | 99.4  |
| 1998–2002 | 3.6             | 13.4             | 84.6  | 18.2            | 62.2             | 97.8  | 2.2             | 7.3              | 103.6 | 5.4             | 18.4             | 97.9  |
| 2003–2007 | 5.8             | 20.4             | 117.1 | 19.6            | 58.9             | 102.0 | 2.6             | 9.7              | 107.7 | 7.4             | 20.2             | 120.5 |
| 2008–2012 | 4.0             | 19.0             | 89.8  | 15.8            | 46.1             | 94.9  | 3.0             | 12.0             | 124.1 | 6.2             | 16.6             | 111.4 |
|           | 25–34           |                  |       | 65–74           |                  |       | 25–34           |                  |       | 65–74           |                  |       |
| 1983–1987 | 12.4            | 35.3             | 138.0 | 4.2             | 36.8             | 84.0  | 3.2             | 10.1             | 93.4  | 5.2             | 31.7             | 101.3 |
| 1988–1992 | 4.4             | 15.6             | 81.4  | 4.2             | 30.4             | 86.2  | 1.8             | 7.0              | 80.7  | 4.6             | 24.0             | 92.1  |
| 1993–1997 | 6.4             | 20.6             | 105.6 | 6.8             | 35.1             | 109.9 | 2.4             | 8.1              | 97.7  | 3.2             | 15.1             | 77.4  |
| 1998–2002 | 10.0            | 29.8             | 110.2 | 9.6             | 43.7             | 96.1  | 5.0             | 14.2             | 122.9 | 5.2             | 20.5             | 97.7  |
| 2003–2007 | 10.6            | 33.0             | 106.5 | 10.0            | 41.9             | 97.7  | 4.2             | 13.5             | 104.0 | 5.8             | 20.8             | 111.9 |
| 2008–2012 | 10.2            | 35.3             | 108.5 | 8.8             | 35.2             | 89.1  | 5.4             | 17.8             | 123.9 | 4.0             | 15.5             | 87.2  |
|           | 35–44           |                  |       | >74 y/o         |                  |       | 35–44           |                  |       | >74 y/o         |                  |       |
| 1983–1987 | 13.8            | 37.2             | 117.0 | 3.4             | 58.0             | 74.1  | 4.4             | 12.3             | 104.4 | 6.4             | 60.3             | 104.4 |
| 1988–1992 | 7.6             | 21.0             | 88.7  | 4.6             | 56.7             | 87.9  | 3.8             | 10.2             | 105.7 | 8.8             | 61.4             | 128.4 |
| 1993–1997 | 6.4             | 19.8             | 80.8  | 5.0             | 50.5             | 96.9  | 1.0             | 4.9              | 57.7  | 5.6             | 32.5             | 94.5  |
| 1998–2002 | 10.8            | 34.9             | 99.0  | 5.6             | 46.0             | 87.2  | 3.8             | 11.7             | 113.6 | 5.4             | 25.1             | 80.9  |
| 2003–2007 | 17.2            | 53.6             | 133.7 | 5.6             | 35.5             | 78.9  | 4.2             | 13.4             | 106.4 | 5.8             | 20.9             | 93.0  |
| 2008–2012 | 15.2            | 43.5             | 117.0 | 8.8             | 42.8             | 103.2 | 5.2             | 15.2             | 112.5 | 7.4             | 21.8             | 113.2 |

Secondary Medical Zone ID: 061

|           | Male            |                  |       |                 |                  |       | Female          |                  |       |                 |                  |       |
|-----------|-----------------|------------------|-------|-----------------|------------------|-------|-----------------|------------------|-------|-----------------|------------------|-------|
|           | Suicide         |                  |       | Suicide         |                  |       | Suicide         |                  |       | Suicide         |                  |       |
|           | Num<br>per year | Rate<br>/100,000 | × 100 | Num<br>per year | Rate<br>/100,000 | × 100 | Num<br>per year | Rate<br>/100,000 | × 100 | Num<br>per year | Rate<br>/100,000 | × 100 |
|           |                 |                  |       |                 |                  |       |                 |                  |       |                 |                  |       |
|           | Total (>10 y/o) |                  |       | 45–54           |                  |       | Total (>10 y/o) |                  |       | 45–54           |                  |       |
| 1983–1987 | 32.2            | 28.7             | 83.3  | 6.6             | 35.9             | 71.0  | 18.4            | 14.7             | 94.6  | 3.6             | 18.2             | 105.8 |
| 1988–1992 | 23.6            | 20.4             | 76.2  | 5.8             | 27.7             | 80.5  | 14.6            | 11.1             | 82.5  | 3.0             | 14.3             | 98.1  |
| 1993–1997 | 27.8            | 22.2             | 81.8  | 6.4             | 30.2             | 82.5  | 14.2            | 9.8              | 87.5  | 2.2             | 11.2             | 86.4  |
| 1998–2002 | 43.4            | 32.4             | 86.1  | 9.8             | 47.3             | 84.4  | 19.6            | 12.7             | 98.9  | 4.0             | 16.8             | 111.6 |
| 2003–2007 | 50.2            | 37.7             | 99.8  | 11.8            | 60.7             | 108.5 | 17.6            | 12.6             | 95.5  | 3.0             | 14.9             | 108.4 |
| 2008–2012 | 42.2            | 33.1             | 93.5  | 7.0             | 43.4             | 89.4  | 18.4            | 12.6             | 101.3 | 3.6             | 18.5             | 124.1 |
|           | 15–24           |                  |       | 55–64           |                  |       | 15–24           |                  |       | 55–64           |                  |       |
| 1983–1987 | 3.0             | 14.0             | 100.7 | 4.6             | 36.8             | 86.5  | 1.0             | 5.9              | 85.7  | 2.2             | 16.4             | 82.9  |
| 1988–1992 | 2.0             | 9.3              | 94.2  | 4.0             | 27.8             | 78.2  | 0.6             | 4.0              | 76.6  | 3.4             | 19.3             | 107.9 |
| 1993–1997 | 2.4             | 11.2             | 99.3  | 4.0             | 26.5             | 65.8  | 1.2             | 5.6              | 107.9 | 2.0             | 12.9             | 81.2  |
| 1998–2002 | 2.0             | 13.4             | 84.5  | 9.6             | 49.3             | 77.6  | 1.2             | 7.2              | 102.5 | 2.2             | 14.4             | 76.7  |
| 2003–2007 | 2.4             | 16.7             | 95.7  | 9.4             | 46.9             | 81.2  | 2.0             | 11.7             | 130.4 | 3.8             | 17.2             | 102.6 |
| 2008–2012 | 3.4             | 23.3             | 109.8 | 9.8             | 48.0             | 98.9  | 0.6             | 7.7              | 79.0  | 3.6             | 16.0             | 107.5 |
|           | 25–34           |                  |       | 65–74           |                  |       | 25–34           |                  |       | 65–74           |                  |       |
| 1983–1987 | 6.0             | 26.4             | 103.1 | 3.0             | 38.0             | 86.7  | 2.0             | 10.1             | 93.8  | 2.2             | 23.4             | 75.0  |
| 1988–1992 | 3.6             | 17.8             | 92.9  | 2.6             | 30.0             | 85.3  | 0.0             | 4.3              | 49.3  | 1.8             | 17.1             | 65.6  |
| 1993–1997 | 4.2             | 19.6             | 100.4 | 3.0             | 28.0             | 87.7  | 1.8             | 9.0              | 107.8 | 4.0             | 24.9             | 127.8 |
| 1998–2002 | 5.6             | 26.4             | 97.9  | 6.0             | 44.4             | 97.5  | 3.2             | 14.1             | 121.9 | 3.2             | 20.9             | 99.4  |
| 2003–2007 | 6.0             | 31.8             | 102.7 | 5.4             | 35.6             | 83.1  | 2.0             | 12.5             | 95.8  | 3.2             | 18.8             | 100.9 |
| 2008–2012 | 5.4             | 34.3             | 105.3 | 6.4             | 36.1             | 91.3  | 0.6             | 10.1             | 70.7  | 4.2             | 20.2             | 113.6 |
|           | 35–44           |                  |       | >74 y/o         |                  |       | 35–44           |                  |       | >74 y/o         |                  |       |
| 1983–1987 | 6.6             | 27.9             | 87.7  | 2.4             | 68.5             | 87.5  | 3.6             | 13.6             | 114.8 | 3.8             | 64.5             | 111.9 |
| 1988–1992 | 3.8             | 18.3             | 77.0  | 1.8             | 42.7             | 66.2  | 2.6             | 10.6             | 109.4 | 3.2             | 40.1             | 83.8  |
| 1993–1997 | 6.0             | 27.9             | 113.7 | 1.8             | 34.1             | 65.5  | 0.8             | 6.2              | 72.4  | 2.2             | 22.3             | 64.8  |
| 1998–2002 | 6.8             | 36.1             | 102.5 | 3.4             | 45.9             | 87.1  | 1.8             | 10.3             | 100.1 | 4.0             | 28.8             | 92.7  |
| 2003–2007 | 10.2            | 51.8             | 129.4 | 5.0             | 49.3             | 109.5 | 1.2             | 9.9              | 78.7  | 2.4             | 15.8             | 70.5  |
| 2008–2012 | 6.0             | 33.7             | 90.5  | 4.2             | 37.0             | 89.2  | 2.4             | 13.6             | 99.9  | 3.4             | 18.1             | 94.2  |

Secondary Medical Zone ID: 062

|           | Male            |          |       |          |          |       | Female          |          |       |          |          |       |
|-----------|-----------------|----------|-------|----------|----------|-------|-----------------|----------|-------|----------|----------|-------|
|           | Suicide         |          |       | Suicide  |          |       | Suicide         |          |       | Suicide  |          |       |
|           | Num             | Rate     | × 100 | Num      | Rate     | × 100 | Num             | Rate     | × 100 | Num      | Rate     | × 100 |
|           | per year        | /100,000 |       | per year | /100,000 |       | per year        | /100,000 |       | per year | /100,000 |       |
|           | Total (>10 y/o) |          |       | 45–54    |          |       | Total (>10 y/o) |          |       | 45–54    |          |       |
| 1983–1987 | 45.0            | 31.3     | 95.6  | 9.0      | 40.3     | 79.6  | 29.0            | 16.8     | 114.4 | 4.8      | 19.8     | 115.1 |
| 1988–1992 | 35.4            | 23.1     | 90.9  | 6.8      | 28.1     | 81.8  | 25.0            | 13.1     | 106.1 | 4.6      | 17.2     | 117.6 |
| 1993–1997 | 37.8            | 22.7     | 88.6  | 8.8      | 32.8     | 89.6  | 21.0            | 10.7     | 99.1  | 3.8      | 13.7     | 106.0 |
| 1998–2002 | 54.0            | 31.4     | 84.3  | 9.8      | 38.6     | 68.9  | 25.0            | 12.7     | 98.2  | 4.8      | 16.5     | 109.6 |
| 2003–2007 | 60.2            | 35.6     | 91.4  | 14.8     | 56.6     | 101.2 | 26.2            | 13.0     | 105.0 | 4.0      | 15.0     | 109.4 |
| 2008–2012 | 67.8            | 37.6     | 108.7 | 13.0     | 52.8     | 108.5 | 21.2            | 11.9     | 89.8  | 2.8      | 13.3     | 89.3  |
|           | 15–24           |          |       | 55–64    |          |       | 15–24           |          |       | 55–64    |          |       |
| 1983–1987 | 2.4             | 11.8     | 84.8  | 7.2      | 39.8     | 93.7  | 1.0             | 5.6      | 82.1  | 3.4      | 17.6     | 89.1  |
| 1988–1992 | 4.0             | 13.4     | 135.4 | 7.2      | 34.2     | 96.2  | 1.0             | 4.7      | 88.5  | 4.4      | 19.2     | 107.7 |
| 1993–1997 | 3.0             | 12.0     | 106.5 | 8.0      | 36.2     | 89.8  | 0.4             | 3.4      | 65.2  | 3.8      | 16.6     | 104.7 |
| 1998–2002 | 3.2             | 15.7     | 99.2  | 13.2     | 55.0     | 86.5  | 1.6             | 7.4      | 105.9 | 4.6      | 19.1     | 101.7 |
| 2003–2007 | 2.8             | 16.3     | 93.4  | 10.8     | 43.2     | 74.8  | 1.4             | 8.4      | 92.8  | 4.8      | 17.6     | 104.8 |
| 2008–2012 | 4.8             | 25.9     | 121.9 | 12.0     | 44.6     | 91.8  | 1.6             | 9.9      | 102.3 | 3.4      | 13.5     | 90.6  |
|           | 25–34           |          |       | 65–74    |          |       | 25–34           |          |       | 65–74    |          |       |
| 1983–1987 | 6.4             | 26.2     | 102.5 | 5.8      | 50.5     | 115.3 | 2.4             | 10.5     | 97.6  | 7.4      | 46.4     | 148.4 |
| 1988–1992 | 6.2             | 24.7     | 129.2 | 3.2      | 27.7     | 78.7  | 1.4             | 7.4      | 85.9  | 4.2      | 25.1     | 96.3  |
| 1993–1997 | 3.4             | 15.6     | 79.9  | 4.4      | 28.3     | 88.7  | 2.2             | 9.0      | 108.7 | 4.0      | 20.2     | 103.5 |
| 1998–2002 | 6.8             | 26.3     | 97.4  | 7.2      | 40.2     | 88.3  | 2.6             | 11.1     | 95.7  | 4.4      | 21.0     | 100.2 |
| 2003–2007 | 7.4             | 30.2     | 97.4  | 6.8      | 35.3     | 82.3  | 3.8             | 15.1     | 116.2 | 4.4      | 19.9     | 106.7 |
| 2008–2012 | 10.6            | 44.2     | 135.6 | 9.6      | 41.7     | 105.4 | 3.0             | 15.0     | 104.9 | 4.0      | 17.7     | 99.5  |
|           | 35–44           |          |       | >74 y/o  |          |       | 35–44           |          |       | >74 y/o  |          |       |
| 1983–1987 | 10.2            | 35.9     | 112.6 | 3.8      | 68.6     | 87.6  | 4.2             | 14.1     | 119.6 | 5.8      | 63.3     | 109.7 |
| 1988–1992 | 4.8             | 18.6     | 78.6  | 3.2      | 47.7     | 74.0  | 2.4             | 9.2      | 95.3  | 6.6      | 54.3     | 113.6 |
| 1993–1997 | 4.6             | 19.0     | 77.4  | 5.4      | 58.4     | 112.2 | 2.4             | 9.1      | 107.2 | 4.4      | 30.1     | 87.4  |
| 1998–2002 | 8.0             | 32.8     | 93.0  | 5.6      | 50.9     | 96.5  | 2.6             | 10.7     | 103.9 | 4.4      | 24.3     | 78.3  |
| 2003–2007 | 14.2            | 53.8     | 134.3 | 3.4      | 28.2     | 62.6  | 2.4             | 11.2     | 88.9  | 5.4      | 23.0     | 102.3 |
| 2008–2012 | 10.4            | 38.2     | 102.7 | 7.0      | 40.3     | 97.2  | 1.6             | 9.6      | 70.8  | 4.8      | 18.0     | 93.4  |

Secondary Medical Zone ID: 063

|                 | Male            |                  |       |                 |                  |       | Female          |                  |       |                 |                  |       |
|-----------------|-----------------|------------------|-------|-----------------|------------------|-------|-----------------|------------------|-------|-----------------|------------------|-------|
|                 | Suicide         |                  |       | Suicide         |                  |       | Suicide         |                  |       | Suicide         |                  |       |
|                 | Num<br>per year | Rate<br>/100,000 | × 100 | Num<br>per year | Rate<br>/100,000 | × 100 | Num<br>per year | Rate<br>/100,000 | × 100 | Num<br>per year | Rate<br>/100,000 | × 100 |
|                 |                 |                  |       |                 |                  |       |                 |                  |       |                 |                  |       |
| Total (>10 y/o) | 45–54           | Total (>10 y/o)  | 45–54 |                 |                  |       |                 |                  |       |                 |                  |       |
| 1983–1987       | 33.4            | 32.5             | 101.8 | 6.8             | 44.7             | 88.3  | 15.4            | 14.8             | 95.9  | 3.0             | 18.9             | 109.6 |
| 1988–1992       | 27.4            | 24.5             | 100.2 | 7.2             | 38.6             | 112.3 | 14.8            | 12.4             | 96.2  | 2.8             | 16.1             | 110.3 |
| 1993–1997       | 36.4            | 27.7             | 115.9 | 8.6             | 38.8             | 106.0 | 14.8            | 10.8             | 102.3 | 2.0             | 11.8             | 91.6  |
| 1998–2002       | 56.2            | 40.3             | 116.0 | 13.2            | 55.7             | 99.6  | 17.0            | 12.7             | 96.9  | 5.2             | 20.2             | 134.1 |
| 2003–2007       | 61.8            | 42.5             | 121.9 | 13.4            | 61.3             | 109.6 | 18.8            | 12.5             | 105.4 | 4.0             | 17.4             | 127.0 |
| 2008–2012       | 53.4            | 36.7             | 112.1 | 9.2             | 50.8             | 104.4 | 17.0            | 12.7             | 97.6  | 1.4             | 11.7             | 78.4  |
|                 | 15–24           |                  |       | 55–64           |                  |       | 15–24           |                  |       | 55–64           |                  |       |
| 1983–1987       | 4.0             | 21.5             | 154.1 | 5.6             | 45.8             | 107.8 | 1.0             | 6.8              | 99.8  | 2.4             | 18.6             | 94.5  |
| 1988–1992       | 2.2             | 11.4             | 115.2 | 2.8             | 24.5             | 69.1  | 2.2             | 8.8              | 167.6 | 2.8             | 18.5             | 103.8 |
| 1993–1997       | 4.6             | 18.2             | 161.1 | 7.0             | 43.7             | 108.5 | 1.0             | 5.5              | 106.3 | 2.4             | 16.0             | 100.5 |
| 1998–2002       | 3.2             | 17.9             | 113.3 | 11.4            | 65.1             | 102.4 | 1.2             | 7.4              | 104.6 | 2.6             | 17.5             | 93.1  |
| 2003–2007       | 3.6             | 21.1             | 120.8 | 14.2            | 65.3             | 113.2 | 1.0             | 8.3              | 91.9  | 3.6             | 17.7             | 105.7 |
| 2008–2012       | 2.6             | 20.4             | 96.2  | 11.8            | 50.0             | 102.8 | 1.0             | 9.3              | 95.5  | 3.0             | 14.4             | 96.6  |
|                 | 25–34           |                  |       | 65–74           |                  |       | 25–34           |                  |       | 65–74           |                  |       |
| 1983–1987       | 5.4             | 25.8             | 101.0 | 2.4             | 40.1             | 91.5  | 2.2             | 11.3             | 105.2 | 2.6             | 30.1             | 96.2  |
| 1988–1992       | 3.4             | 19.2             | 100.3 | 2.8             | 35.3             | 100.3 | 0.4             | 5.7              | 65.8  | 2.4             | 23.3             | 89.2  |
| 1993–1997       | 4.8             | 24.7             | 126.3 | 4.2             | 37.3             | 117.0 | 0.4             | 5.7              | 68.9  | 3.0             | 21.7             | 111.2 |
| 1998–2002       | 7.2             | 33.7             | 124.7 | 7.6             | 54.6             | 120.1 | 2.8             | 13.9             | 119.6 | 2.0             | 16.7             | 79.3  |
| 2003–2007       | 7.8             | 37.4             | 120.5 | 7.6             | 50.2             | 117.1 | 1.4             | 10.7             | 82.0  | 3.0             | 19.3             | 103.8 |
| 2008–2012       | 7.6             | 39.1             | 120.0 | 8.2             | 47.1             | 119.3 | 2.2             | 14.5             | 101.3 | 3.6             | 20.1             | 113.1 |
|                 | 35–44           |                  |       | >74 y/o         |                  |       | 35–44           |                  |       | >74 y/o         |                  |       |
| 1983–1987       | 8.2             | 36.5             | 114.8 | 1.0             | 47.6             | 60.8  | 1.8             | 10.7             | 90.6  | 2.4             | 48.6             | 84.2  |
| 1988–1992       | 6.8             | 27.3             | 115.2 | 2.0             | 52.8             | 81.9  | 2.2             | 10.1             | 104.3 | 2.0             | 31.7             | 66.3  |
| 1993–1997       | 5.8             | 26.2             | 106.8 | 1.2             | 32.7             | 62.8  | 1.8             | 8.9              | 105.2 | 4.0             | 41.1             | 119.3 |
| 1998–2002       | 11.0            | 53.2             | 151.1 | 2.4             | 42.0             | 79.6  | 1.2             | 8.7              | 84.3  | 2.0             | 19.4             | 62.6  |
| 2003–2007       | 10.2            | 53.3             | 133.1 | 5.0             | 53.2             | 118.0 | 1.2             | 10.2             | 80.5  | 4.6             | 28.6             | 127.2 |
| 2008–2012       | 7.6             | 38.3             | 102.9 | 6.2             | 52.0             | 125.3 | 2.8             | 14.8             | 109.0 | 2.8             | 16.6             | 86.2  |



Secondary Medical Zone ID: 064

|           | Male            |                  |       |                 |                  |       | Female          |                  |       |                 |                  |       |
|-----------|-----------------|------------------|-------|-----------------|------------------|-------|-----------------|------------------|-------|-----------------|------------------|-------|
|           | Suicide         |                  |       | Suicide         |                  |       | Suicide         |                  |       | Suicide         |                  |       |
|           | Num<br>per year | Rate<br>/100,000 | × 100 | Num<br>per year | Rate<br>/100,000 | × 100 | Num<br>per year | Rate<br>/100,000 | × 100 | Num<br>per year | Rate<br>/100,000 | × 100 |
|           |                 |                  |       |                 |                  |       |                 |                  |       |                 |                  |       |
|           | Total (>10 y/o) |                  |       | 45–54           |                  |       | Total (>10 y/o) |                  |       | 45–54           |                  |       |
| 1983–1987 | 30.0            | 30.9             | 92.5  | 8.0             | 49.2             | 97.4  | 16.8            | 15.3             | 100.6 | 3.2             | 19.0             | 110.3 |
| 1988–1992 | 25.0            | 23.1             | 91.6  | 5.4             | 30.4             | 88.4  | 17.0            | 13.1             | 105.2 | 3.0             | 15.8             | 107.9 |
| 1993–1997 | 30.6            | 24.9             | 98.5  | 8.4             | 38.2             | 104.5 | 16.2            | 11.6             | 106.9 | 3.6             | 15.3             | 118.5 |
| 1998–2002 | 48.2            | 36.3             | 101.9 | 10.8            | 51.3             | 91.6  | 19.2            | 13.1             | 104.3 | 3.6             | 16.2             | 107.7 |
| 2003–2007 | 50.0            | 38.5             | 104.1 | 9.8             | 53.2             | 95.1  | 16.2            | 12.2             | 93.7  | 1.6             | 11.3             | 82.8  |
| 2008–2012 | 40.0            | 33.4             | 91.5  | 7.2             | 45.5             | 93.6  | 12.6            | 11.4             | 80.5  | 0.6             | 9.5              | 63.6  |
|           | 15–24           |                  |       | 55–64           |                  |       | 15–24           |                  |       | 55–64           |                  |       |
| 1983–1987 | 3.6             | 19.1             | 136.6 | 4.2             | 38.0             | 89.3  | 1.8             | 8.7              | 127.5 | 2.2             | 18.0             | 91.2  |
| 1988–1992 | 1.8             | 9.7              | 98.1  | 4.4             | 31.9             | 89.8  | 1.2             | 5.8              | 109.8 | 3.0             | 19.2             | 107.5 |
| 1993–1997 | 3.2             | 14.0             | 123.5 | 5.0             | 33.9             | 84.2  | 0.8             | 4.8              | 91.3  | 3.0             | 17.7             | 111.2 |
| 1998–2002 | 3.6             | 18.8             | 118.8 | 11.8            | 65.0             | 102.3 | 2.4             | 10.3             | 146.5 | 2.8             | 17.4             | 92.4  |
| 2003–2007 | 4.0             | 22.5             | 129.2 | 9.6             | 49.5             | 85.8  | 2.8             | 14.4             | 160.1 | 3.0             | 15.9             | 94.7  |
| 2008–2012 | 2.8             | 21.6             | 101.7 | 10.0            | 48.3             | 99.5  | 1.0             | 9.0              | 93.1  | 1.0             | 10.0             | 66.9  |
|           | 25–34           |                  |       | 65–74           |                  |       | 25–34           |                  |       | 65–74           |                  |       |
| 1983–1987 | 4.6             | 25.8             | 100.9 | 2.0             | 35.0             | 80.0  | 1.4             | 9.4              | 87.8  | 2.8             | 30.5             | 97.6  |
| 1988–1992 | 4.0             | 22.1             | 115.8 | 1.8             | 27.4             | 77.9  | 1.6             | 9.4              | 107.9 | 3.4             | 29.4             | 112.8 |
| 1993–1997 | 3.2             | 18.3             | 93.6  | 2.4             | 26.1             | 81.7  | 1.8             | 9.5              | 113.8 | 2.0             | 17.0             | 87.3  |
| 1998–2002 | 5.0             | 25.7             | 95.3  | 5.4             | 43.7             | 96.2  | 1.4             | 9.8              | 84.3  | 3.4             | 22.9             | 109.1 |
| 2003–2007 | 8.2             | 38.7             | 124.8 | 5.4             | 39.8             | 92.7  | 1.2             | 9.9              | 76.2  | 1.4             | 13.4             | 72.2  |
| 2008–2012 | 5.8             | 34.2             | 105.0 | 4.2             | 30.8             | 78.0  | 2.0             | 14.0             | 98.0  | 2.2             | 15.5             | 86.9  |
|           | 35–44           |                  |       | >74 y/o         |                  |       | 35–44           |                  |       | >74 y/o         |                  |       |
| 1983–1987 | 5.8             | 28.8             | 90.4  | 1.8             | 58.1             | 74.2  | 1.8             | 10.3             | 87.2  | 3.4             | 61.3             | 106.3 |
| 1988–1992 | 5.4             | 24.7             | 104.3 | 2.0             | 49.7             | 77.0  | 2.2             | 10.2             | 105.2 | 2.6             | 37.6             | 78.5  |
| 1993–1997 | 5.8             | 28.6             | 116.8 | 2.6             | 47.7             | 91.7  | 3.4             | 13.7             | 161.3 | 1.6             | 20.1             | 58.3  |
| 1998–2002 | 7.0             | 39.1             | 111.1 | 4.6             | 61.6             | 116.8 | 2.2             | 11.9             | 115.3 | 3.4             | 28.0             | 90.2  |
| 2003–2007 | 8.8             | 47.9             | 119.5 | 3.8             | 42.5             | 94.3  | 2.2             | 13.1             | 103.6 | 4.0             | 25.0             | 111.4 |
| 2008–2012 | 7.2             | 37.4             | 100.5 | 2.4             | 27.4             | 66.0  | 2.4             | 13.7             | 101.0 | 3.4             | 18.8             | 97.7  |

Secondary Medical Zone ID: 065

|           | Male            |                  |       |                 |                  |       | Female          |                  |       |                 |                  |       |
|-----------|-----------------|------------------|-------|-----------------|------------------|-------|-----------------|------------------|-------|-----------------|------------------|-------|
|           | Suicide         |                  |       | Suicide         |                  |       | Suicide         |                  |       | Suicide         |                  |       |
|           | Num<br>per year | Rate<br>/100,000 | × 100 | Num<br>per year | Rate<br>/100,000 | × 100 | Num<br>per year | Rate<br>/100,000 | × 100 | Num<br>per year | Rate<br>/100,000 | × 100 |
|           |                 |                  |       |                 |                  |       |                 |                  |       |                 |                  |       |
|           | Total (>10 y/o) |                  |       | 45–54           |                  |       | Total (>10 y/o) |                  |       | 45–54           |                  |       |
| 1983–1987 | 32.6            | 32.7             | 100.6 | 6.4             | 44.6             | 88.1  | 23.4            | 18.7             | 136.3 | 2.6             | 18.3             | 106.4 |
| 1988–1992 | 25.0            | 22.8             | 90.7  | 5.2             | 30.5             | 88.8  | 14.4            | 12.2             | 94.0  | 2.4             | 14.9             | 102.0 |
| 1993–1997 | 32.8            | 25.2             | 102.2 | 8.0             | 36.6             | 100.0 | 17.8            | 11.7             | 116.9 | 2.2             | 12.0             | 93.0  |
| 1998–2002 | 46.2            | 34.1             | 93.8  | 13.4            | 58.8             | 105.0 | 19.2            | 12.7             | 103.7 | 2.4             | 13.1             | 87.1  |
| 2003–2007 | 50.2            | 35.5             | 95.7  | 10.2            | 51.5             | 92.1  | 15.8            | 11.4             | 88.4  | 1.2             | 9.9              | 72.2  |
| 2008–2012 | 43.6            | 30.9             | 86.1  | 6.0             | 35.8             | 73.6  | 19.8            | 12.9             | 100.6 | 2.6             | 14.8             | 99.0  |
|           | 15–24           |                  |       | 55–64           |                  |       | 15–24           |                  |       | 55–64           |                  |       |
| 1983–1987 | 4.0             | 19.5             | 139.7 | 3.8             | 36.1             | 85.0  | 1.8             | 9.0              | 132.1 | 3.6             | 24.3             | 123.2 |
| 1988–1992 | 3.4             | 12.2             | 123.7 | 4.4             | 33.7             | 94.9  | 1.2             | 5.6              | 105.6 | 2.0             | 16.5             | 92.3  |
| 1993–1997 | 4.0             | 13.7             | 121.5 | 5.2             | 37.1             | 92.3  | 1.4             | 5.7              | 109.9 | 1.8             | 14.5             | 90.9  |
| 1998–2002 | 3.2             | 14.6             | 92.1  | 7.8             | 49.9             | 78.6  | 1.6             | 7.4              | 105.0 | 2.6             | 17.7             | 94.3  |
| 2003–2007 | 4.4             | 19.3             | 110.8 | 10.8            | 53.6             | 92.9  | 2.4             | 11.1             | 123.6 | 2.8             | 15.6             | 93.3  |
| 2008–2012 | 5.2             | 24.4             | 114.9 | 8.0             | 40.3             | 82.9  | 2.2             | 11.5             | 118.7 | 3.2             | 14.9             | 99.8  |
|           | 25–34           |                  |       | 65–74           |                  |       | 25–34           |                  |       | 65–74           |                  |       |
| 1983–1987 | 5.6             | 29.0             | 113.4 | 3.8             | 52.6             | 120.1 | 3.6             | 16.1             | 149.8 | 3.6             | 36.9             | 118.2 |
| 1988–1992 | 3.8             | 19.9             | 104.0 | 2.4             | 32.8             | 93.1  | 0.8             | 6.9              | 79.0  | 3.0             | 27.8             | 106.4 |
| 1993–1997 | 5.2             | 22.9             | 117.5 | 3.6             | 34.9             | 109.3 | 1.8             | 9.1              | 109.7 | 2.8             | 21.7             | 111.3 |
| 1998–2002 | 6.2             | 26.4             | 97.6  | 4.8             | 43.0             | 94.6  | 2.2             | 11.2             | 96.5  | 4.4             | 28.7             | 136.8 |
| 2003–2007 | 5.0             | 23.4             | 75.4  | 5.8             | 44.5             | 103.8 | 1.0             | 8.4              | 64.7  | 1.8             | 15.9             | 85.5  |
| 2008–2012 | 7.4             | 32.6             | 100.1 | 5.8             | 38.5             | 97.5  | 2.0             | 11.9             | 83.0  | 3.0             | 18.8             | 105.9 |
|           | 35–44           |                  |       | >74 y/o         |                  |       | 35–44           |                  |       | >74 y/o         |                  |       |
| 1983–1987 | 5.6             | 27.4             | 86.1  | 3.4             | 91.1             | 116.3 | 5.2             | 19.3             | 163.3 | 3.0             | 55.5             | 96.2  |
| 1988–1992 | 3.8             | 18.7             | 79.0  | 2.0             | 51.1             | 79.3  | 1.8             | 9.0              | 93.3  | 2.8             | 39.9             | 83.3  |
| 1993–1997 | 4.4             | 22.1             | 90.3  | 2.4             | 47.6             | 91.5  | 1.8             | 8.8              | 103.9 | 6.0             | 58.3             | 169.5 |
| 1998–2002 | 7.2             | 36.1             | 102.4 | 3.6             | 53.5             | 101.5 | 1.4             | 9.0              | 87.2  | 4.4             | 35.2             | 113.3 |
| 2003–2007 | 10.2            | 46.6             | 116.3 | 3.6             | 42.6             | 94.5  | 2.4             | 12.7             | 100.2 | 4.2             | 26.7             | 118.8 |
| 2008–2012 | 6.4             | 29.2             | 78.6  | 4.6             | 42.8             | 103.2 | 3.2             | 13.9             | 102.6 | 3.6             | 20.2             | 104.9 |

Secondary Medical Zone ID: 066

|           | Male            |                  |       |                 |                  |       | Female          |                  |       |                 |                  |       |
|-----------|-----------------|------------------|-------|-----------------|------------------|-------|-----------------|------------------|-------|-----------------|------------------|-------|
|           | Suicide         |                  |       | Suicide         |                  |       | Suicide         |                  |       | Suicide         |                  |       |
|           | Num<br>per year | Rate<br>/100,000 | × 100 | Num<br>per year | Rate<br>/100,000 | × 100 | Num<br>per year | Rate<br>/100,000 | × 100 | Num<br>per year | Rate<br>/100,000 | × 100 |
|           |                 |                  |       |                 |                  |       |                 |                  |       |                 |                  |       |
|           | Total (>10 y/o) |                  |       | 45–54           |                  |       | Total (>10 y/o) |                  |       | 45–54           |                  |       |
| 1983–1987 | 38.6            | 29.1             | 85.5  | 8.4             | 37.8             | 74.7  | 20.8            | 14.4             | 93.2  | 4.0             | 18.2             | 105.8 |
| 1988–1992 | 35.0            | 22.0             | 85.8  | 9.6             | 31.0             | 90.2  | 20.8            | 11.9             | 91.2  | 3.8             | 13.9             | 95.0  |
| 1993–1997 | 45.8            | 23.2             | 92.0  | 12.6            | 32.9             | 90.0  | 22.4            | 10.3             | 97.1  | 4.6             | 12.5             | 96.7  |
| 1998–2002 | 69.8            | 32.5             | 88.0  | 16.6            | 44.5             | 79.5  | 28.0            | 12.1             | 95.0  | 4.4             | 12.5             | 82.8  |
| 2003–2007 | 75.4            | 34.0             | 91.4  | 15.8            | 49.8             | 89.1  | 32.8            | 13.0             | 107.7 | 3.4             | 11.5             | 84.0  |
| 2008–2012 | 79.2            | 35.1             | 100.3 | 15.0            | 52.2             | 107.4 | 28.0            | 12.4             | 92.7  | 3.4             | 13.1             | 88.1  |
|           | 15–24           |                  |       | 55–64           |                  |       | 15–24           |                  |       | 55–64           |                  |       |
| 1983–1987 | 6.2             | 22.8             | 163.6 | 4.0             | 31.4             | 73.8  | 2.0             | 8.0              | 117.5 | 3.4             | 20.1             | 101.7 |
| 1988–1992 | 2.4             | 8.5              | 85.5  | 5.4             | 29.1             | 81.9  | 1.2             | 4.5              | 86.1  | 3.6             | 18.0             | 101.0 |
| 1993–1997 | 6.4             | 15.6             | 138.1 | 9.0             | 36.4             | 90.5  | 2.6             | 6.7              | 128.7 | 4.2             | 17.1             | 107.4 |
| 1998–2002 | 5.4             | 16.4             | 103.7 | 16.6            | 52.8             | 83.1  | 2.6             | 7.8              | 111.4 | 4.8             | 16.9             | 89.8  |
| 2003–2007 | 5.2             | 18.3             | 104.8 | 19.4            | 51.2             | 88.6  | 2.2             | 8.7              | 96.2  | 8.2             | 19.9             | 119.1 |
| 2008–2012 | 3.6             | 17.0             | 80.2  | 16.6            | 44.0             | 90.6  | 2.2             | 9.8              | 101.3 | 4.6             | 12.6             | 84.8  |
|           | 25–34           |                  |       | 65–74           |                  |       | 25–34           |                  |       | 65–74           |                  |       |
| 1983–1987 | 3.6             | 18.8             | 73.4  | 3.0             | 37.6             | 86.0  | 2.2             | 9.9              | 92.3  | 2.2             | 22.2             | 71.0  |
| 1988–1992 | 4.4             | 19.2             | 100.3 | 4.0             | 37.2             | 105.5 | 1.8             | 8.3              | 95.8  | 2.4             | 19.1             | 73.4  |
| 1993–1997 | 5.6             | 20.1             | 102.9 | 3.6             | 27.0             | 84.8  | 0.8             | 5.3              | 64.2  | 4.4             | 23.6             | 121.3 |
| 1998–2002 | 8.2             | 26.0             | 96.1  | 8.4             | 45.5             | 100.1 | 3.6             | 11.8             | 101.9 | 4.4             | 21.6             | 102.6 |
| 2003–2007 | 12.4            | 36.6             | 118.0 | 7.4             | 34.1             | 79.5  | 3.0             | 11.0             | 84.4  | 5.8             | 22.7             | 121.6 |
| 2008–2012 | 13.0            | 40.9             | 125.6 | 9.6             | 33.7             | 85.2  | 4.4             | 15.4             | 107.2 | 6.2             | 20.0             | 112.2 |
|           | 35–44           |                  |       | >74 y/o         |                  |       | 35–44           |                  |       | >74 y/o         |                  |       |
| 1983–1987 | 10.2            | 29.6             | 93.0  | 2.8             | 68.1             | 87.0  | 3.4             | 10.6             | 90.2  | 3.6             | 54.1             | 93.8  |
| 1988–1992 | 6.8             | 20.2             | 85.1  | 2.4             | 46.4             | 72.0  | 3.8             | 10.2             | 105.8 | 4.2             | 43.1             | 90.1  |
| 1993–1997 | 5.2             | 18.1             | 73.6  | 3.0             | 43.8             | 84.2  | 1.4             | 5.8              | 68.6  | 4.4             | 33.4             | 97.1  |
| 1998–2002 | 9.4             | 33.1             | 93.9  | 5.2             | 55.4             | 105.1 | 2.6             | 9.6              | 93.1  | 5.6             | 32.8             | 105.5 |
| 2003–2007 | 9.6             | 33.4             | 83.3  | 5.6             | 44.8             | 99.4  | 4.4             | 14.5             | 114.5 | 5.6             | 25.5             | 113.8 |
| 2008–2012 | 13.8            | 39.1             | 105.0 | 7.6             | 45.9             | 110.7 | 4.0             | 13.0             | 95.9  | 3.2             | 13.9             | 72.4  |

Secondary Medical Zone ID: 067

|                 | Male            |                  |       |                 |                  |       | Female          |                  |       |                 |                  |       |
|-----------------|-----------------|------------------|-------|-----------------|------------------|-------|-----------------|------------------|-------|-----------------|------------------|-------|
|                 | Suicide         |                  |       | Suicide         |                  |       | Suicide         |                  |       | Suicide         |                  |       |
|                 | Num<br>per year | Rate<br>/100,000 | × 100 | Num<br>per year | Rate<br>/100,000 | × 100 | Num<br>per year | Rate<br>/100,000 | × 100 | Num<br>per year | Rate<br>/100,000 | × 100 |
|                 |                 |                  |       |                 |                  |       |                 |                  |       |                 |                  |       |
| Total (>10 y/o) | 45–54           | Total (>10 y/o)  | 45–54 |                 |                  |       |                 |                  |       |                 |                  |       |
| 1983–1987       | 43.0            | 36.2             | 113.8 | 7.6             | 44.9             | 88.8  | 20.4            | 15.4             | 102.3 | 2.6             | 16.4             | 95.1  |
| 1988–1992       | 31.0            | 24.8             | 100.8 | 7.4             | 37.8             | 110.0 | 20.8            | 13.5             | 110.1 | 2.2             | 13.7             | 93.9  |
| 1993–1997       | 36.2            | 26.4             | 107.2 | 10.6            | 44.6             | 121.9 | 17.8            | 11.0             | 105.6 | 3.2             | 14.4             | 111.5 |
| 1998–2002       | 54.6            | 38.3             | 108.9 | 12.2            | 52.4             | 93.7  | 19.6            | 12.5             | 99.6  | 2.4             | 12.8             | 85.3  |
| 2003–2007       | 52.6            | 38.4             | 104.6 | 12.2            | 57.5             | 102.8 | 19.4            | 12.5             | 103.0 | 3.2             | 15.0             | 109.3 |
| 2008–2012       | 45.0            | 35.0             | 98.7  | 8.8             | 50.2             | 103.3 | 18.0            | 12.9             | 99.6  | 0.8             | 9.8              | 65.8  |
|                 | 15–24           |                  |       | 55–64           |                  |       | 15–24           |                  |       | 55–64           |                  |       |
| 1983–1987       | 4.4             | 21.3             | 153.1 | 6.6             | 43.8             | 103.1 | 1.0             | 6.3              | 92.9  | 4.0             | 21.9             | 111.1 |
| 1988–1992       | 1.4             | 8.6              | 86.6  | 5.0             | 31.7             | 89.2  | 0.6             | 4.2              | 80.4  | 5.4             | 25.4             | 142.5 |
| 1993–1997       | 2.0             | 10.6             | 94.1  | 4.2             | 29.6             | 73.5  | 1.4             | 6.1              | 117.2 | 2.8             | 16.5             | 103.6 |
| 1998–2002       | 5.8             | 25.0             | 158.4 | 10.6            | 60.6             | 95.4  | 0.6             | 5.5              | 77.7  | 4.2             | 21.8             | 115.7 |
| 2003–2007       | 4.0             | 22.1             | 126.9 | 11.4            | 55.7             | 96.5  | 0.8             | 7.3              | 81.4  | 4.0             | 18.5             | 110.7 |
| 2008–2012       | 3.8             | 25.5             | 120.4 | 9.0             | 42.1             | 86.7  | 1.0             | 9.1              | 93.5  | 3.0             | 14.3             | 95.7  |
|                 | 25–34           |                  |       | 65–74           |                  |       | 25–34           |                  |       | 65–74           |                  |       |
| 1983–1987       | 7.0             | 31.0             | 121.1 | 2.8             | 36.5             | 83.3  | 2.2             | 10.9             | 101.5 | 4.2             | 34.4             | 110.0 |
| 1988–1992       | 3.8             | 20.3             | 106.0 | 3.4             | 34.1             | 96.8  | 1.4             | 8.4              | 97.2  | 3.6             | 25.9             | 99.2  |
| 1993–1997       | 4.2             | 22.1             | 113.2 | 4.6             | 34.8             | 109.1 | 0.8             | 6.7              | 80.6  | 2.8             | 18.2             | 93.2  |
| 1998–2002       | 4.4             | 24.5             | 90.7  | 6.8             | 47.2             | 103.7 | 2.0             | 11.5             | 99.1  | 3.2             | 20.2             | 96.1  |
| 2003–2007       | 7.8             | 38.0             | 122.6 | 4.2             | 33.1             | 77.2  | 1.6             | 11.2             | 86.3  | 3.6             | 21.2             | 113.6 |
| 2008–2012       | 7.0             | 38.8             | 119.1 | 6.0             | 39.4             | 99.8  | 3.2             | 17.8             | 124.1 | 2.0             | 15.2             | 85.7  |
|                 | 35–44           |                  |       | >74 y/o         |                  |       | 35–44           |                  |       | >74 y/o         |                  |       |
| 1983–1987       | 11.6            | 47.1             | 148.0 | 2.8             | 66.9             | 85.4  | 3.2             | 13.8             | 117.2 | 3.2             | 46.7             | 80.9  |
| 1988–1992       | 5.2             | 22.1             | 93.4  | 4.8             | 79.0             | 122.5 | 3.2             | 12.1             | 124.8 | 4.4             | 45.8             | 95.6  |
| 1993–1997       | 6.8             | 29.5             | 120.4 | 3.6             | 53.5             | 102.7 | 1.6             | 8.2              | 96.4  | 5.0             | 40.1             | 116.4 |
| 1998–2002       | 8.8             | 44.6             | 126.6 | 5.8             | 64.9             | 123.1 | 2.2             | 11.6             | 111.9 | 5.0             | 32.4             | 104.3 |
| 2003–2007       | 8.2             | 46.1             | 114.9 | 4.8             | 44.8             | 99.4  | 2.0             | 12.5             | 99.3  | 4.2             | 22.5             | 100.5 |
| 2008–2012       | 6.6             | 36.4             | 97.9  | 3.8             | 33.7             | 81.1  | 3.4             | 16.6             | 122.7 | 4.6             | 21.4             | 111.2 |

Secondary Medical Zone ID: 068

|           | Male            |          |       |          |          |       | Female          |          |       |          |          |       |
|-----------|-----------------|----------|-------|----------|----------|-------|-----------------|----------|-------|----------|----------|-------|
|           | Suicide         |          |       | Suicide  |          |       | Suicide         |          |       | Suicide  |          |       |
|           | Num             | Rate     | × 100 | Num      | Rate     | × 100 | Num             | Rate     | × 100 | Num      | Rate     | × 100 |
|           | per year        | /100,000 |       | per year | /100,000 |       | per year        | /100,000 |       | per year | /100,000 |       |
|           | Total (>10 y/o) |          |       | 45–54    |          |       | Total (>10 y/o) |          |       | 45–54    |          |       |
| 1983–1987 | 29.0            | 32.4     | 101.7 | 6.2      | 46.1     | 91.1  | 16.2            | 16.5     | 111.3 | 2.6      | 18.6     | 108.0 |
| 1988–1992 | 25.4            | 25.2     | 104.1 | 6.8      | 39.3     | 114.5 | 15.0            | 13.3     | 108.2 | 2.6      | 15.9     | 109.0 |
| 1993–1997 | 29.8            | 26.4     | 107.4 | 6.6      | 34.7     | 95.0  | 16.4            | 12.2     | 122.2 | 3.4      | 16.0     | 123.7 |
| 1998–2002 | 46.6            | 38.4     | 110.3 | 10.8     | 53.7     | 95.9  | 17.2            | 12.9     | 107.7 | 2.0      | 12.9     | 85.5  |
| 2003–2007 | 45.6            | 38.4     | 106.4 | 10.6     | 58.8     | 105.2 | 15.2            | 12.4     | 99.6  | 2.0      | 12.8     | 93.4  |
| 2008–2012 | 42.8            | 36.2     | 107.1 | 7.8      | 50.7     | 104.3 | 16.8            | 12.8     | 107.2 | 1.6      | 13.1     | 87.8  |
|           | 15–24           |          |       | 55–64    |          |       | 15–24           |          |       | 55–64    |          |       |
| 1983–1987 | 2.4             | 15.1     | 108.6 | 4.6      | 43.9     | 103.2 | 1.0             | 6.8      | 99.4  | 1.6      | 17.0     | 86.0  |
| 1988–1992 | 2.0             | 10.6     | 106.7 | 4.6      | 36.7     | 103.2 | 1.0             | 5.5      | 105.0 | 2.4      | 18.6     | 104.0 |
| 1993–1997 | 1.6             | 10.2     | 90.1  | 6.2      | 43.5     | 108.0 | 1.2             | 6.0      | 114.3 | 2.8      | 18.6     | 117.2 |
| 1998–2002 | 3.6             | 19.3     | 122.2 | 10.6     | 66.7     | 105.0 | 0.8             | 6.2      | 88.7  | 2.8      | 18.9     | 100.5 |
| 2003–2007 | 3.6             | 21.4     | 122.6 | 9.2      | 51.9     | 90.0  | 1.8             | 11.1     | 123.4 | 3.0      | 17.0     | 101.7 |
| 2008–2012 | 2.4             | 20.4     | 96.0  | 7.6      | 42.0     | 86.4  | 0.8             | 8.5      | 87.3  | 3.2      | 15.9     | 106.9 |
|           | 25–34           |          |       | 65–74    |          |       | 25–34           |          |       | 65–74    |          |       |
| 1983–1987 | 6.8             | 35.5     | 139.0 | 3.4      | 53.8     | 122.8 | 2.8             | 14.3     | 132.4 | 1.6      | 25.3     | 81.0  |
| 1988–1992 | 3.4             | 21.0     | 110.0 | 1.6      | 28.5     | 80.8  | 0.6             | 6.7      | 76.8  | 3.0      | 30.3     | 116.1 |
| 1993–1997 | 3.2             | 20.0     | 102.2 | 2.8      | 31.5     | 98.9  | 0.4             | 6.0      | 71.5  | 3.8      | 29.1     | 149.1 |
| 1998–2002 | 4.2             | 25.8     | 95.5  | 5.4      | 49.1     | 108.0 | 1.4             | 10.4     | 90.1  | 4.0      | 28.3     | 134.8 |
| 2003–2007 | 6.6             | 37.0     | 119.2 | 4.4      | 39.3     | 91.6  | 1.8             | 12.5     | 96.3  | 1.2      | 14.0     | 75.2  |
| 2008–2012 | 5.2             | 34.7     | 106.6 | 5.2      | 38.9     | 98.5  | 1.4             | 12.8     | 89.6  | 4.2      | 23.9     | 134.3 |
|           | 35–44           |          |       | >74 y/o  |          |       | 35–44           |          |       | >74 y/o  |          |       |
| 1983–1987 | 4.4             | 25.8     | 81.1  | 1.2      | 56.7     | 72.4  | 2.2             | 12.3     | 103.9 | 4.2      | 86.6     | 150.1 |
| 1988–1992 | 3.6             | 19.5     | 82.2  | 3.4      | 82.5     | 127.9 | 2.0             | 10.1     | 104.8 | 3.0      | 49.6     | 103.7 |
| 1993–1997 | 6.0             | 30.3     | 123.7 | 3.0      | 62.4     | 119.8 | 1.0             | 7.2      | 84.2  | 3.8      | 45.5     | 132.3 |
| 1998–2002 | 7.6             | 44.1     | 125.3 | 4.4      | 69.4     | 131.7 | 1.8             | 11.1     | 107.3 | 4.4      | 41.1     | 132.2 |
| 2003–2007 | 6.8             | 43.4     | 108.3 | 4.4      | 54.7     | 121.5 | 1.6             | 12.0     | 95.3  | 3.8      | 28.7     | 128.1 |
| 2008–2012 | 9.4             | 48.8     | 131.1 | 5.2      | 52.3     | 126.0 | 1.6             | 12.4     | 91.5  | 4.0      | 25.0     | 130.0 |

Secondary Medical Zone ID: 069

|           | Male            |                  |       |                 |                  |       | Female          |                  |       |                 |                  |       |
|-----------|-----------------|------------------|-------|-----------------|------------------|-------|-----------------|------------------|-------|-----------------|------------------|-------|
|           | Suicide         |                  |       | Suicide         |                  |       | Suicide         |                  |       | Suicide         |                  |       |
|           | Num<br>per year | Rate<br>/100,000 | × 100 | Num<br>per year | Rate<br>/100,000 | × 100 | Num<br>per year | Rate<br>/100,000 | × 100 | Num<br>per year | Rate<br>/100,000 | × 100 |
|           |                 |                  |       |                 |                  |       |                 |                  |       |                 |                  |       |
|           | Total (>10 y/o) |                  |       | 45–54           |                  |       | Total (>10 y/o) |                  |       | 45–54           |                  |       |
| 1983–1987 | 54.2            | 36.7             | 115.4 | 11.6            | 53.2             | 105.2 | 34.0            | 18.7             | 129.9 | 4.0             | 17.9             | 104.0 |
| 1988–1992 | 45.6            | 27.1             | 115.2 | 8.2             | 34.9             | 101.7 | 36.6            | 16.7             | 147.2 | 3.0             | 14.2             | 97.1  |
| 1993–1997 | 53.2            | 28.5             | 120.4 | 9.6             | 34.6             | 94.6  | 28.8            | 12.9             | 128.7 | 4.2             | 15.0             | 115.8 |
| 1998–2002 | 76.6            | 39.3             | 113.8 | 19.8            | 61.0             | 108.9 | 36.2            | 14.9             | 132.1 | 6.2             | 18.8             | 125.1 |
| 2003–2007 | 85.0            | 43.0             | 120.6 | 19.0            | 63.0             | 112.7 | 29.0            | 12.8             | 111.2 | 5.6             | 17.8             | 129.7 |
| 2008–2012 | 85.8            | 41.6             | 127.1 | 16.6            | 60.9             | 125.3 | 34.2            | 14.8             | 126.6 | 5.6             | 20.2             | 135.3 |
|           | 15–24           |                  |       | 55–64           |                  |       | 15–24           |                  |       | 55–64           |                  |       |
| 1983–1987 | 6.2             | 24.9             | 178.7 | 9.2             | 46.8             | 110.2 | 2.2             | 8.9              | 130.0 | 4.8             | 21.0             | 106.2 |
| 1988–1992 | 3.0             | 11.4             | 115.3 | 8.0             | 37.1             | 104.4 | 1.4             | 5.8              | 109.1 | 5.0             | 20.3             | 113.6 |
| 1993–1997 | 4.0             | 13.8             | 122.4 | 11.2            | 49.2             | 122.3 | 1.0             | 4.7              | 89.4  | 4.2             | 17.9             | 112.4 |
| 1998–2002 | 6.4             | 22.2             | 140.7 | 14.0            | 61.8             | 97.3  | 1.6             | 7.0              | 99.4  | 4.8             | 20.3             | 108.0 |
| 2003–2007 | 5.6             | 22.3             | 128.0 | 15.6            | 56.4             | 97.6  | 1.2             | 7.2              | 79.6  | 4.6             | 17.2             | 102.9 |
| 2008–2012 | 5.8             | 26.8             | 126.6 | 19.0            | 56.8             | 117.0 | 0.8             | 6.8              | 69.6  | 3.6             | 13.2             | 88.4  |
|           | 25–34           |                  |       | 65–74           |                  |       | 25–34           |                  |       | 65–74           |                  |       |
| 1983–1987 | 7.2             | 26.3             | 102.8 | 6.0             | 52.5             | 119.9 | 4.2             | 14.4             | 133.4 | 7.8             | 46.8             | 149.8 |
| 1988–1992 | 5.8             | 22.5             | 117.9 | 6.2             | 44.1             | 125.3 | 3.6             | 12.8             | 147.1 | 8.4             | 42.5             | 162.8 |
| 1993–1997 | 4.6             | 19.1             | 97.9  | 8.4             | 46.4             | 145.4 | 3.2             | 11.7             | 140.4 | 7.0             | 30.0             | 153.8 |
| 1998–2002 | 8.2             | 29.6             | 109.4 | 8.6             | 46.0             | 101.1 | 3.0             | 12.2             | 105.4 | 6.4             | 26.6             | 126.4 |
| 2003–2007 | 14.0            | 45.6             | 147.0 | 8.4             | 43.4             | 101.2 | 2.4             | 11.3             | 86.8  | 3.6             | 17.3             | 93.1  |
| 2008–2012 | 9.4             | 35.3             | 108.4 | 12.4            | 54.5             | 138.1 | 5.2             | 19.8             | 138.4 | 4.0             | 18.3             | 102.9 |
|           | 35–44           |                  |       | >74 y/o         |                  |       | 35–44           |                  |       | >74 y/o         |                  |       |
| 1983–1987 | 8.2             | 30.7             | 96.3  | 5.4             | 92.0             | 117.5 | 3.4             | 12.9             | 109.5 | 7.6             | 79.1             | 137.1 |
| 1988–1992 | 9.2             | 28.1             | 118.5 | 4.8             | 67.4             | 104.4 | 5.6             | 15.3             | 158.7 | 9.6             | 74.4             | 155.5 |
| 1993–1997 | 9.0             | 29.2             | 119.1 | 6.4             | 70.0             | 134.3 | 2.2             | 8.3              | 97.1  | 6.8             | 42.8             | 124.5 |
| 1998–2002 | 10.0            | 37.7             | 107.1 | 9.6             | 80.6             | 153.0 | 3.2             | 12.1             | 117.0 | 10.8            | 51.8             | 166.9 |
| 2003–2007 | 13.4            | 51.3             | 128.0 | 9.0             | 59.9             | 132.9 | 2.4             | 11.5             | 91.0  | 9.0             | 34.7             | 154.8 |
| 2008–2012 | 14.8            | 49.4             | 132.8 | 7.6             | 44.2             | 106.6 | 4.2             | 15.7             | 115.5 | 10.6            | 33.8             | 175.7 |

Secondary Medical Zone ID: 070

|                 | Male            |                  |       |                 |                  |       | Female          |                  |       |                 |                  |       |
|-----------------|-----------------|------------------|-------|-----------------|------------------|-------|-----------------|------------------|-------|-----------------|------------------|-------|
|                 | Suicide         |                  |       | Suicide         |                  |       | Suicide         |                  |       | Suicide         |                  |       |
|                 | Num<br>per year | Rate<br>/100,000 | × 100 | Num<br>per year | Rate<br>/100,000 | × 100 | Num<br>per year | Rate<br>/100,000 | × 100 | Num<br>per year | Rate<br>/100,000 | × 100 |
|                 |                 |                  |       |                 |                  |       |                 |                  |       |                 |                  |       |
| Total (>10 y/o) | 45–54           | Total (>10 y/o)  | 45–54 |                 |                  |       |                 |                  |       |                 |                  |       |
| 1983–1987       | 24.2            | 30.7             | 92.6  | 5.2             | 43.5             | 86.0  | 17.2            | 16.8             | 114.8 | 3.4             | 21.5             | 125.0 |
| 1988–1992       | 25.0            | 26.6             | 113.2 | 5.4             | 38.8             | 113.0 | 20.4            | 15.8             | 140.6 | 2.8             | 17.4             | 119.3 |
| 1993–1997       | 28.2            | 27.5             | 116.5 | 5.4             | 36.0             | 98.3  | 16.2            | 12.1             | 126.3 | 1.0             | 10.3             | 80.1  |
| 1998–2002       | 41.2            | 39.3             | 115.2 | 8.4             | 53.4             | 95.5  | 17.2            | 13.7             | 115.1 | 2.6             | 16.0             | 106.4 |
| 2003–2007       | 38.8            | 39.5             | 109.0 | 9.8             | 65.4             | 117.0 | 13.4            | 12.4             | 99.4  | 2.2             | 14.8             | 107.7 |
| 2008–2012       | 35.2            | 35.1             | 108.2 | 6.0             | 48.2             | 99.2  | 11.6            | 12.4             | 93.3  | 1.2             | 12.9             | 86.4  |
|                 | 15–24           |                  |       | 55–64           |                  |       | 15–24           |                  |       | 55–64           |                  |       |
| 1983–1987       | 2.2             | 16.6             | 119.1 | 5.4             | 46.0             | 108.2 | 0.6             | 6.2              | 90.4  | 2.6             | 19.8             | 100.4 |
| 1988–1992       | 0.4             | 7.4              | 74.3  | 3.2             | 28.8             | 81.1  | 1.0             | 6.2              | 118.5 | 2.8             | 19.4             | 108.4 |
| 1993–1997       | 3.4             | 17.3             | 153.2 | 5.0             | 40.2             | 99.8  | 0.8             | 5.6              | 107.8 | 2.6             | 18.0             | 113.1 |
| 1998–2002       | 3.8             | 23.5             | 148.5 | 9.2             | 69.3             | 109.0 | 1.2             | 8.3              | 117.7 | 3.6             | 22.6             | 120.1 |
| 2003–2007       | 1.6             | 17.0             | 97.6  | 7.2             | 51.5             | 89.3  | 0.8             | 8.7              | 96.6  | 1.8             | 15.0             | 89.4  |
| 2008–2012       | 1.6             | 20.2             | 95.2  | 8.4             | 51.5             | 106.0 | 1.2             | 11.5             | 118.3 | 2.4             | 15.4             | 103.0 |
|                 | 25–34           |                  |       | 65–74           |                  |       | 25–34           |                  |       | 65–74           |                  |       |
| 1983–1987       | 3.2             | 24.5             | 96.0  | 2.8             | 43.9             | 100.2 | 1.6             | 11.5             | 106.9 | 2.6             | 30.6             | 97.9  |
| 1988–1992       | 2.8             | 21.4             | 112.0 | 3.2             | 39.1             | 110.9 | 1.4             | 10.0             | 114.8 | 4.0             | 34.4             | 131.8 |
| 1993–1997       | 3.4             | 23.9             | 122.4 | 3.4             | 34.2             | 107.2 | 1.2             | 9.0              | 108.1 | 4.2             | 29.2             | 149.9 |
| 1998–2002       | 4.0             | 29.0             | 107.3 | 5.4             | 48.6             | 106.8 | 1.8             | 12.7             | 110.0 | 2.0             | 18.1             | 86.0  |
| 2003–2007       | 3.2             | 28.3             | 91.1  | 5.0             | 45.0             | 104.9 | 1.8             | 14.0             | 107.6 | 2.2             | 18.3             | 98.1  |
| 2008–2012       | 3.4             | 33.0             | 101.3 | 3.8             | 36.6             | 92.7  | 1.0             | 12.9             | 90.0  | 2.0             | 17.3             | 97.0  |
|                 | 35–44           |                  |       | >74 y/o         |                  |       | 35–44           |                  |       | >74 y/o         |                  |       |
| 1983–1987       | 3.0             | 24.1             | 75.7  | 2.2             | 70.3             | 89.7  | 1.4             | 11.0             | 93.4  | 5.0             | 87.2             | 151.1 |
| 1988–1992       | 5.8             | 32.3             | 136.1 | 4.2             | 88.0             | 136.4 | 2.6             | 12.9             | 133.6 | 5.8             | 76.1             | 159.0 |
| 1993–1997       | 3.4             | 23.8             | 97.1  | 4.2             | 74.1             | 142.2 | 1.6             | 9.9              | 117.0 | 4.8             | 51.2             | 148.9 |
| 1998–2002       | 6.2             | 43.5             | 123.6 | 4.2             | 62.5             | 118.5 | 1.2             | 10.1             | 97.7  | 4.6             | 39.6             | 127.4 |
| 2003–2007       | 8.2             | 58.6             | 146.2 | 3.8             | 46.5             | 103.2 | 0.8             | 10.4             | 82.0  | 3.8             | 26.5             | 118.1 |
| 2008–2012       | 5.0             | 38.2             | 102.6 | 6.6             | 60.5             | 145.9 | 1.2             | 12.3             | 90.8  | 2.6             | 17.4             | 90.3  |

Secondary Medical Zone ID: 071

|           | Male            |                  |       |                 |                  |       | Female          |                  |       |                 |                  |       |
|-----------|-----------------|------------------|-------|-----------------|------------------|-------|-----------------|------------------|-------|-----------------|------------------|-------|
|           | Suicide         |                  |       | Suicide         |                  |       | Suicide         |                  |       | Suicide         |                  |       |
|           | Num<br>per year | Rate<br>/100,000 | × 100 | Num<br>per year | Rate<br>/100,000 | × 100 | Num<br>per year | Rate<br>/100,000 | × 100 | Num<br>per year | Rate<br>/100,000 | × 100 |
|           |                 |                  |       |                 |                  |       |                 |                  |       |                 |                  |       |
|           | Total (>10 y/o) |                  |       | 45–54           |                  |       | Total (>10 y/o) |                  |       | 45–54           |                  |       |
| 1983–1987 | 51.8            | 31.1             | 94.6  | 13.8            | 50.4             | 99.6  | 28.8            | 15.7             | 104.1 | 3.8             | 15.1             | 87.8  |
| 1988–1992 | 50.4            | 25.6             | 106.1 | 13.8            | 41.2             | 120.0 | 33.0            | 14.5             | 120.9 | 4.2             | 13.9             | 95.2  |
| 1993–1997 | 53.2            | 24.8             | 99.4  | 12.8            | 34.2             | 93.4  | 21.8            | 9.8              | 88.9  | 3.2             | 10.2             | 78.7  |
| 1998–2002 | 73.2            | 32.9             | 89.1  | 17.2            | 46.4             | 83.0  | 34.0            | 13.1             | 107.7 | 5.8             | 15.4             | 102.2 |
| 2003–2007 | 84.0            | 35.5             | 96.5  | 18.2            | 53.5             | 95.7  | 30.8            | 12.6             | 98.1  | 5.4             | 15.4             | 112.6 |
| 2008–2012 | 80.2            | 34.1             | 97.7  | 15.0            | 47.3             | 97.2  | 33.0            | 12.9             | 102.4 | 3.0             | 11.7             | 78.4  |
|           | 15–24           |                  |       | 55–64           |                  |       | 15–24           |                  |       | 55–64           |                  |       |
| 1983–1987 | 3.8             | 13.4             | 96.3  | 8.0             | 43.3             | 101.8 | 2.4             | 7.7              | 112.6 | 6.2             | 26.0             | 131.8 |
| 1988–1992 | 3.0             | 9.0              | 90.6  | 8.4             | 36.4             | 102.5 | 1.8             | 5.4              | 101.7 | 7.2             | 25.5             | 142.9 |
| 1993–1997 | 5.2             | 13.1             | 116.1 | 8.8             | 35.2             | 87.5  | 1.2             | 4.3              | 81.5  | 4.8             | 17.4             | 109.5 |
| 1998–2002 | 5.4             | 16.6             | 105.2 | 17.2            | 58.3             | 91.8  | 2.4             | 7.8              | 110.4 | 7.0             | 21.7             | 115.4 |
| 2003–2007 | 5.2             | 18.5             | 105.9 | 19.2            | 55.2             | 95.7  | 2.6             | 9.8              | 109.3 | 5.4             | 15.9             | 94.7  |
| 2008–2012 | 7.2             | 27.4             | 129.0 | 16.2            | 45.8             | 94.4  | 2.6             | 11.1             | 114.3 | 6.2             | 16.2             | 108.7 |
|           | 25–34           |                  |       | 65–74           |                  |       | 25–34           |                  |       | 65–74           |                  |       |
| 1983–1987 | 8.4             | 25.4             | 99.5  | 3.2             | 34.9             | 79.8  | 3.0             | 9.6              | 89.3  | 5.4             | 36.8             | 117.8 |
| 1988–1992 | 7.8             | 22.6             | 118.2 | 5.6             | 42.5             | 120.7 | 3.0             | 9.3              | 106.7 | 6.2             | 34.3             | 131.3 |
| 1993–1997 | 7.6             | 21.1             | 107.8 | 6.8             | 40.2             | 126.1 | 1.6             | 6.2              | 74.7  | 4.0             | 20.0             | 102.7 |
| 1998–2002 | 9.4             | 24.3             | 89.9  | 6.4             | 36.0             | 79.3  | 3.2             | 9.9              | 85.2  | 6.2             | 25.6             | 121.7 |
| 2003–2007 | 12.2            | 30.2             | 97.3  | 8.0             | 37.3             | 87.0  | 3.0             | 9.8              | 75.6  | 6.4             | 23.4             | 125.5 |
| 2008–2012 | 10.6            | 30.6             | 93.9  | 10.6            | 40.9             | 103.6 | 5.0             | 15.2             | 106.4 | 5.0             | 17.9             | 100.5 |
|           | 35–44           |                  |       | >74 y/o         |                  |       | 35–44           |                  |       | >74 y/o         |                  |       |
| 1983–1987 | 11.4            | 29.7             | 93.2  | 2.8             | 62.3             | 79.5  | 3.6             | 10.2             | 86.5  | 4.2             | 56.8             | 98.5  |
| 1988–1992 | 9.2             | 23.3             | 98.3  | 2.4             | 42.5             | 65.9  | 5.2             | 12.1             | 124.8 | 5.4             | 49.6             | 103.6 |
| 1993–1997 | 6.6             | 19.8             | 80.6  | 5.2             | 61.4             | 117.8 | 2.6             | 8.0              | 93.5  | 4.4             | 31.6             | 91.8  |
| 1998–2002 | 11.6            | 34.5             | 97.9  | 5.6             | 54.0             | 102.5 | 3.2             | 10.2             | 98.9  | 5.8             | 31.4             | 101.2 |
| 2003–2007 | 15.2            | 41.7             | 104.1 | 5.8             | 43.1             | 95.7  | 4.6             | 13.4             | 106.3 | 3.4             | 15.7             | 70.0  |
| 2008–2012 | 14.0            | 35.0             | 94.0  | 6.4             | 38.7             | 93.3  | 3.8             | 11.4             | 84.1  | 7.4             | 25.0             | 130.2 |



Secondary Medical Zone ID: 072

|           | Male            |                  |       |                 |                  |       | Female          |                  |       |                 |                  |       |
|-----------|-----------------|------------------|-------|-----------------|------------------|-------|-----------------|------------------|-------|-----------------|------------------|-------|
|           | Suicide         |                  |       | Suicide         |                  |       | Suicide         |                  |       | Suicide         |                  |       |
|           | Num<br>per year | Rate<br>/100,000 | × 100 | Num<br>per year | Rate<br>/100,000 | × 100 | Num<br>per year | Rate<br>/100,000 | × 100 | Num<br>per year | Rate<br>/100,000 | × 100 |
|           |                 |                  |       |                 |                  |       |                 |                  |       |                 |                  |       |
|           | Total (>10 y/o) |                  |       | 45–54           |                  |       | Total (>10 y/o) |                  |       | 45–54           |                  |       |
| 1983–1987 | 23.2            | 35.3             | 115.6 | 4.4             | 50.3             | 99.4  | 13.8            | 17.3             | 122.9 | 2.8             | 23.2             | 134.7 |
| 1988–1992 | 20.8            | 27.6             | 123.6 | 4.2             | 40.8             | 118.8 | 14.6            | 15.1             | 137.0 | 1.4             | 15.4             | 105.0 |
| 1993–1997 | 19.4            | 26.1             | 108.5 | 4.0             | 35.6             | 97.2  | 11.4            | 11.8             | 122.3 | 1.2             | 12.7             | 98.2  |
| 1998–2002 | 24.8            | 34.0             | 95.2  | 5.8             | 47.9             | 85.6  | 10.2            | 12.0             | 99.7  | 1.6             | 14.6             | 96.8  |
| 2003–2007 | 25.0            | 34.9             | 93.2  | 6.4             | 54.2             | 96.9  | 11.8            | 13.0             | 112.6 | 1.0             | 12.0             | 87.4  |
| 2008–2012 | 28.6            | 36.4             | 111.2 | 6.6             | 59.5             | 122.5 | 12.8            | 13.4             | 118.2 | 1.6             | 15.8             | 106.2 |
|           | 15–24           |                  |       | 55–64           |                  |       | 15–24           |                  |       | 55–64           |                  |       |
| 1983–1987 | 2.2             | 19.3             | 138.7 | 3.6             | 44.3             | 104.3 | 0.2             | 5.6              | 82.3  | 1.8             | 19.7             | 99.8  |
| 1988–1992 | 1.4             | 11.4             | 115.0 | 4.6             | 45.6             | 128.4 | 1.0             | 7.0              | 132.7 | 2.2             | 20.4             | 114.3 |
| 1993–1997 | 1.2             | 11.5             | 101.5 | 3.8             | 42.7             | 106.1 | 0.2             | 4.3              | 81.5  | 1.2             | 15.2             | 95.8  |
| 1998–2002 | 1.6             | 16.3             | 103.1 | 5.0             | 59.4             | 93.6  | 0.2             | 5.6              | 80.2  | 1.4             | 18.3             | 97.1  |
| 2003–2007 | 2.0             | 19.9             | 114.0 | 5.0             | 49.6             | 86.0  | 0.6             | 8.6              | 95.7  | 1.2             | 15.3             | 91.2  |
| 2008–2012 | 2.4             | 26.2             | 123.7 | 5.0             | 43.2             | 88.9  | 0.6             | 9.6              | 98.9  | 2.8             | 18.1             | 121.3 |
|           | 25–34           |                  |       | 65–74           |                  |       | 25–34           |                  |       | 65–74           |                  |       |
| 1983–1987 | 3.2             | 27.3             | 106.6 | 1.8             | 41.2             | 94.0  | 0.6             | 8.7              | 80.8  | 3.2             | 42.1             | 134.6 |
| 1988–1992 | 2.0             | 19.8             | 103.8 | 2.4             | 40.0             | 113.4 | 1.2             | 10.3             | 118.3 | 2.8             | 32.9             | 126.1 |
| 1993–1997 | 2.0             | 20.8             | 106.3 | 3.0             | 39.1             | 122.6 | 0.4             | 7.3              | 87.5  | 3.6             | 31.9             | 163.8 |
| 1998–2002 | 2.8             | 28.0             | 103.8 | 3.6             | 47.0             | 103.3 | 0.6             | 10.1             | 87.5  | 1.6             | 19.8             | 94.3  |
| 2003–2007 | 2.4             | 27.3             | 88.1  | 2.6             | 38.6             | 90.0  | 2.0             | 16.2             | 124.7 | 2.4             | 23.2             | 124.6 |
| 2008–2012 | 2.0             | 27.7             | 85.1  | 4.2             | 47.3             | 119.7 | 0.6             | 12.1             | 84.2  | 1.4             | 18.0             | 101.3 |
|           | 35–44           |                  |       | >74 y/o         |                  |       | 35–44           |                  |       | >74 y/o         |                  |       |
| 1983–1987 | 5.8             | 43.3             | 136.1 | 2.0             | 77.7             | 99.2  | 1.4             | 12.7             | 107.8 | 3.8             | 82.9             | 143.7 |
| 1988–1992 | 3.6             | 26.0             | 109.7 | 2.4             | 70.5             | 109.3 | 1.0             | 9.3              | 96.5  | 5.0             | 82.6             | 172.6 |
| 1993–1997 | 3.6             | 27.8             | 113.6 | 1.4             | 43.2             | 83.0  | 0.8             | 8.0              | 94.3  | 4.0             | 54.3             | 157.6 |
| 1998–2002 | 2.2             | 27.0             | 76.6  | 3.8             | 71.3             | 135.3 | 0.6             | 8.9              | 86.2  | 4.2             | 45.7             | 147.1 |
| 2003–2007 | 3.2             | 36.5             | 91.2  | 3.4             | 53.5             | 118.8 | 0.8             | 11.6             | 91.9  | 3.8             | 33.6             | 149.8 |
| 2008–2012 | 4.2             | 39.7             | 106.7 | 4.2             | 53.5             | 128.9 | 0.8             | 12.2             | 89.9  | 5.0             | 35.1             | 182.6 |

Secondary Medical Zone ID: 073

|                 | Male            |                  |       |                 |                  |       | Female          |                  |       |                 |                  |       |
|-----------------|-----------------|------------------|-------|-----------------|------------------|-------|-----------------|------------------|-------|-----------------|------------------|-------|
|                 | Suicide         |                  |       | Suicide         |                  |       | Suicide         |                  |       | Suicide         |                  |       |
|                 | Num<br>per year | Rate<br>/100,000 | × 100 | Num<br>per year | Rate<br>/100,000 | × 100 | Num<br>per year | Rate<br>/100,000 | × 100 | Num<br>per year | Rate<br>/100,000 | × 100 |
|                 |                 |                  |       |                 |                  |       |                 |                  |       |                 |                  |       |
| Total (>10 y/o) | 45–54           | Total (>10 y/o)  | 45–54 |                 |                  |       |                 |                  |       |                 |                  |       |
| 1983–1987       | 57.0            | 33.0             | 102.1 | 13.8            | 51.1             | 101.1 | 31.6            | 16.4             | 110.0 | 5.4             | 19.8             | 114.7 |
| 1988–1992       | 47.4            | 24.7             | 100.9 | 11.6            | 36.6             | 106.7 | 29.0            | 13.3             | 106.3 | 6.6             | 19.6             | 134.1 |
| 1993–1997       | 53.0            | 25.1             | 99.9  | 13.4            | 36.0             | 98.3  | 27.0            | 11.1             | 105.6 | 3.6             | 11.3             | 87.7  |
| 1998–2002       | 79.0            | 34.8             | 96.8  | 15.6            | 41.7             | 74.4  | 28.8            | 12.1             | 93.1  | 4.6             | 13.3             | 88.7  |
| 2003–2007       | 76.2            | 32.9             | 90.0  | 16.4            | 46.8             | 83.7  | 30.4            | 12.2             | 98.2  | 4.4             | 13.2             | 96.5  |
| 2008–2012       | 77.4            | 33.5             | 97.4  | 12.6            | 42.3             | 87.0  | 30.4            | 12.4             | 97.7  | 2.2             | 10.0             | 67.0  |
|                 | 15–24           |                  |       | 55–64           |                  |       | 15–24           |                  |       | 55–64           |                  |       |
| 1983–1987       | 4.6             | 16.1             | 115.2 | 6.2             | 33.1             | 77.8  | 1.4             | 5.7              | 84.1  | 5.2             | 21.3             | 108.1 |
| 1988–1992       | 4.8             | 12.8             | 129.0 | 7.2             | 31.0             | 87.2  | 2.8             | 7.2              | 137.3 | 3.8             | 16.1             | 90.2  |
| 1993–1997       | 3.6             | 10.8             | 95.8  | 8.8             | 34.8             | 86.5  | 2.6             | 6.7              | 129.0 | 3.6             | 14.5             | 91.2  |
| 1998–2002       | 6.6             | 19.6             | 124.2 | 18.8            | 62.6             | 98.6  | 1.6             | 6.0              | 85.6  | 4.4             | 16.6             | 88.1  |
| 2003–2007       | 4.4             | 16.5             | 94.4  | 21.0            | 58.7             | 101.7 | 2.8             | 10.0             | 110.9 | 6.8             | 18.8             | 112.2 |
| 2008–2012       | 5.0             | 20.8             | 98.3  | 18.0            | 47.0             | 96.8  | 2.2             | 9.6              | 98.5  | 6.0             | 15.7             | 105.6 |
|                 | 25–34           |                  |       | 65–74           |                  |       | 25–34           |                  |       | 65–74           |                  |       |
| 1983–1987       | 10.2            | 30.0             | 117.3 | 6.8             | 55.2             | 126.0 | 3.4             | 10.8             | 100.2 | 4.2             | 28.6             | 91.6  |
| 1988–1992       | 3.8             | 14.3             | 74.7  | 6.2             | 42.3             | 120.2 | 1.0             | 5.5              | 63.4  | 3.8             | 21.6             | 82.6  |
| 1993–1997       | 7.8             | 24.4             | 124.8 | 6.8             | 36.6             | 114.8 | 2.6             | 8.7              | 104.4 | 4.0             | 18.3             | 94.0  |
| 1998–2002       | 10.2            | 29.8             | 110.3 | 10.0            | 47.0             | 103.3 | 4.6             | 13.4             | 115.7 | 5.2             | 21.5             | 102.2 |
| 2003–2007       | 10.0            | 30.2             | 97.4  | 7.8             | 35.6             | 83.1  | 3.8             | 12.4             | 95.6  | 4.0             | 16.9             | 90.8  |
| 2008–2012       | 9.4             | 32.4             | 99.4  | 10.6            | 40.2             | 101.8 | 3.4             | 13.1             | 91.5  | 4.4             | 16.9             | 94.7  |
|                 | 35–44           |                  |       | >74 y/o         |                  |       | 35–44           |                  |       | >74 y/o         |                  |       |
| 1983–1987       | 12.6            | 34.1             | 107.2 | 2.8             | 55.4             | 70.8  | 5.4             | 14.5             | 122.7 | 6.6             | 71.1             | 123.2 |
| 1988–1992       | 9.0             | 23.2             | 97.9  | 4.8             | 65.0             | 100.7 | 4.4             | 11.2             | 115.9 | 6.4             | 52.4             | 109.5 |
| 1993–1997       | 8.0             | 22.8             | 93.0  | 4.2             | 48.4             | 93.0  | 2.8             | 8.3              | 98.1  | 7.8             | 47.8             | 138.9 |
| 1998–2002       | 10.4            | 33.3             | 94.5  | 7.4             | 62.7             | 118.9 | 3.8             | 11.7             | 113.1 | 4.6             | 23.5             | 75.8  |
| 2003–2007       | 9.0             | 30.3             | 75.5  | 7.6             | 49.6             | 110.2 | 2.6             | 10.2             | 80.6  | 6.0             | 23.1             | 103.0 |
| 2008–2012       | 13.4            | 38.2             | 102.5 | 8.2             | 44.2             | 106.6 | 5.4             | 15.5             | 114.2 | 6.6             | 21.4             | 111.3 |

Secondary Medical Zone ID: 074

|           | Male            |                  |       |                 |                  |       | Female          |                  |       |                 |                  |       |
|-----------|-----------------|------------------|-------|-----------------|------------------|-------|-----------------|------------------|-------|-----------------|------------------|-------|
|           | Suicide         |                  |       | Suicide         |                  |       | Suicide         |                  |       | Suicide         |                  |       |
|           | Num<br>per year | Rate<br>/100,000 | × 100 | Num<br>per year | Rate<br>/100,000 | × 100 | Num<br>per year | Rate<br>/100,000 | × 100 | Num<br>per year | Rate<br>/100,000 | × 100 |
|           |                 |                  |       |                 |                  |       |                 |                  |       |                 |                  |       |
|           | Total (>10 y/o) |                  |       | 45–54           |                  |       | Total (>10 y/o) |                  |       | 45–54           |                  |       |
| 1983–1987 | 40.4            | 33.5             | 103.1 | 9.6             | 50.4             | 99.7  | 30.6            | 19.3             | 138.5 | 6.2             | 25.6             | 148.8 |
| 1988–1992 | 38.0            | 27.5             | 117.2 | 6.2             | 31.1             | 90.5  | 22.4            | 13.8             | 113.4 | 4.6             | 18.6             | 127.5 |
| 1993–1997 | 38.6            | 27.3             | 111.2 | 10.4            | 42.0             | 114.7 | 20.6            | 11.8             | 116.1 | 2.6             | 12.1             | 93.8  |
| 1998–2002 | 52.4            | 36.4             | 103.5 | 13.0            | 56.1             | 100.2 | 23.4            | 13.1             | 112.1 | 3.0             | 14.1             | 93.7  |
| 2003–2007 | 51.4            | 36.9             | 102.2 | 12.0            | 60.6             | 108.4 | 21.4            | 13.1             | 108.6 | 2.2             | 12.6             | 91.9  |
| 2008–2012 | 49.0            | 35.7             | 106.6 | 10.0            | 55.8             | 114.8 | 22.0            | 14.0             | 112.7 | 3.8             | 19.0             | 127.5 |
|           | 15–24           |                  |       | 55–64           |                  |       | 15–24           |                  |       | 55–64           |                  |       |
| 1983–1987 | 3.8             | 17.7             | 127.0 | 4.6             | 33.7             | 79.4  | 1.4             | 7.1              | 104.4 | 2.8             | 17.3             | 87.8  |
| 1988–1992 | 2.0             | 9.8              | 98.8  | 9.0             | 47.4             | 133.6 | 0.8             | 4.7              | 89.0  | 2.4             | 14.9             | 83.6  |
| 1993–1997 | 2.4             | 11.6             | 103.0 | 8.8             | 46.4             | 115.3 | 0.8             | 4.8              | 92.3  | 4.2             | 19.7             | 123.7 |
| 1998–2002 | 1.2             | 11.2             | 70.6  | 10.4            | 56.0             | 88.2  | 1.2             | 7.3              | 103.7 | 4.4             | 20.6             | 109.7 |
| 2003–2007 | 2.8             | 18.3             | 105.2 | 13.2            | 59.3             | 102.7 | 1.2             | 9.0              | 100.1 | 4.2             | 18.0             | 107.2 |
| 2008–2012 | 2.8             | 22.2             | 104.8 | 12.8            | 54.7             | 112.6 | 0.4             | 6.9              | 71.1  | 2.4             | 12.8             | 85.7  |
|           | 25–34           |                  |       | 65–74           |                  |       | 25–34           |                  |       | 65–74           |                  |       |
| 1983–1987 | 4.2             | 22.9             | 89.5  | 4.0             | 43.8             | 100.0 | 2.8             | 12.8             | 119.3 | 6.2             | 44.9             | 143.6 |
| 1988–1992 | 3.8             | 20.6             | 108.0 | 5.6             | 47.4             | 134.6 | 1.2             | 7.8              | 90.0  | 4.2             | 28.3             | 108.5 |
| 1993–1997 | 4.8             | 24.2             | 124.0 | 2.6             | 23.5             | 73.8  | 1.6             | 8.8              | 105.2 | 5.0             | 27.4             | 140.4 |
| 1998–2002 | 6.0             | 30.1             | 111.3 | 8.8             | 55.5             | 122.1 | 1.0             | 8.8              | 75.6  | 4.6             | 24.6             | 117.3 |
| 2003–2007 | 4.8             | 28.1             | 90.7  | 5.4             | 37.4             | 87.2  | 2.4             | 13.7             | 105.0 | 2.4             | 15.6             | 83.6  |
| 2008–2012 | 5.6             | 35.1             | 107.6 | 6.8             | 40.5             | 102.6 | 2.6             | 16.2             | 113.2 | 3.6             | 18.8             | 105.5 |
|           | 35–44           |                  |       | >74 y/o         |                  |       | 35–44           |                  |       | >74 y/o         |                  |       |
| 1983–1987 | 8.6             | 34.7             | 108.9 | 5.2             | 102.5            | 130.9 | 4.0             | 14.8             | 125.3 | 7.2             | 93.7             | 162.4 |
| 1988–1992 | 6.6             | 26.7             | 112.6 | 4.6             | 73.6             | 114.0 | 3.2             | 11.9             | 122.8 | 6.0             | 61.7             | 129.0 |
| 1993–1997 | 5.6             | 26.9             | 109.6 | 4.0             | 56.4             | 108.3 | 1.8             | 8.9              | 104.5 | 4.4             | 36.9             | 107.4 |
| 1998–2002 | 7.4             | 39.7             | 112.7 | 5.6             | 63.1             | 119.7 | 2.0             | 11.0             | 106.7 | 7.2             | 45.2             | 145.7 |
| 2003–2007 | 7.4             | 41.3             | 103.1 | 5.8             | 52.6             | 116.9 | 2.8             | 14.5             | 115.1 | 6.2             | 31.9             | 142.3 |
| 2008–2012 | 5.2             | 31.1             | 83.6  | 5.8             | 45.1             | 108.7 | 4.0             | 17.8             | 131.5 | 5.2             | 23.2             | 120.8 |

Secondary Medical Zone ID: 075

|                 | Male            |                  |       |                 |                  |       | Female          |                  |       |                 |                  |       |
|-----------------|-----------------|------------------|-------|-----------------|------------------|-------|-----------------|------------------|-------|-----------------|------------------|-------|
|                 | Suicide         |                  |       | Suicide         |                  |       | Suicide         |                  |       | Suicide         |                  |       |
|                 | Num<br>per year | Rate<br>/100,000 | × 100 | Num<br>per year | Rate<br>/100,000 | × 100 | Num<br>per year | Rate<br>/100,000 | × 100 | Num<br>per year | Rate<br>/100,000 | × 100 |
|                 |                 |                  |       |                 |                  |       |                 |                  |       |                 |                  |       |
| Total (>10 y/o) | 45–54           | Total (>10 y/o)  | 45–54 |                 |                  |       |                 |                  |       |                 |                  |       |
| 1983–1987       | 47.6            | 35.2             | 111.5 | 9.8             | 47.7             | 94.4  | 27.0            | 17.1             | 116.9 | 5.2             | 21.5             | 124.8 |
| 1988–1992       | 33.6            | 23.9             | 96.0  | 9.8             | 40.7             | 118.6 | 23.4            | 13.4             | 108.6 | 3.4             | 14.8             | 100.9 |
| 1993–1997       | 40.0            | 25.6             | 103.4 | 8.4             | 33.4             | 91.4  | 25.0            | 12.5             | 124.4 | 4.4             | 15.3             | 118.8 |
| 1998–2002       | 49.6            | 32.4             | 86.9  | 11.8            | 47.4             | 84.7  | 26.8            | 13.2             | 112.0 | 4.6             | 16.7             | 110.9 |
| 2003–2007       | 60.0            | 37.6             | 101.6 | 11.8            | 52.2             | 93.3  | 24.6            | 12.8             | 106.6 | 4.0             | 15.9             | 116.1 |
| 2008–2012       | 56.8            | 35.2             | 103.2 | 9.2             | 45.6             | 93.9  | 24.8            | 14.0             | 107.2 | 3.0             | 14.7             | 98.6  |
|                 | 15–24           |                  |       | 55–64           |                  |       | 15–24           |                  |       | 55–64           |                  |       |
| 1983–1987       | 4.6             | 19.5             | 139.6 | 5.8             | 38.7             | 91.0  | 1.2             | 6.2              | 90.5  | 4.6             | 23.4             | 118.7 |
| 1988–1992       | 2.6             | 10.6             | 107.5 | 5.0             | 28.9             | 81.3  | 0.8             | 4.3              | 80.8  | 3.0             | 16.1             | 90.3  |
| 1993–1997       | 3.8             | 14.2             | 125.7 | 7.8             | 39.5             | 98.0  | 1.4             | 5.7              | 108.4 | 4.6             | 19.8             | 124.3 |
| 1998–2002       | 3.0             | 15.3             | 96.7  | 12.8            | 60.2             | 94.7  | 1.2             | 6.5              | 93.2  | 4.0             | 18.3             | 97.4  |
| 2003–2007       | 3.4             | 18.4             | 105.3 | 16.4            | 65.5             | 113.4 | 2.2             | 11.0             | 122.2 | 4.2             | 16.8             | 100.3 |
| 2008–2012       | 4.8             | 26.2             | 123.3 | 11.0            | 45.3             | 93.2  | 2.4             | 12.7             | 130.9 | 4.2             | 15.8             | 105.9 |
|                 | 25–34           |                  |       | 65–74           |                  |       | 25–34           |                  |       | 65–74           |                  |       |
| 1983–1987       | 6.6             | 27.9             | 109.0 | 4.4             | 47.7             | 108.9 | 2.2             | 10.1             | 93.8  | 2.6             | 24.9             | 79.8  |
| 1988–1992       | 4.2             | 19.1             | 100.0 | 3.6             | 34.4             | 97.7  | 2.8             | 10.9             | 125.9 | 3.6             | 25.6             | 98.2  |
| 1993–1997       | 4.8             | 20.7             | 105.9 | 3.2             | 25.8             | 80.8  | 2.0             | 8.7              | 104.2 | 3.2             | 19.1             | 98.2  |
| 1998–2002       | 6.6             | 27.4             | 101.5 | 6.4             | 40.9             | 89.9  | 2.2             | 10.4             | 89.7  | 5.4             | 26.0             | 123.9 |
| 2003–2007       | 8.6             | 35.9             | 115.7 | 6.2             | 37.3             | 86.9  | 2.0             | 10.8             | 82.7  | 4.6             | 21.5             | 115.5 |
| 2008–2012       | 5.4             | 29.7             | 91.2  | 10.0            | 48.7             | 123.4 | 2.8             | 14.7             | 102.7 | 4.6             | 20.2             | 113.7 |
|                 | 35–44           |                  |       | >74 y/o         |                  |       | 35–44           |                  |       | >74 y/o         |                  |       |
| 1983–1987       | 10.4            | 37.3             | 117.2 | 5.4             | 100.7            | 128.6 | 4.8             | 15.5             | 131.2 | 6.4             | 78.5             | 136.1 |
| 1988–1992       | 5.2             | 20.3             | 85.8  | 3.2             | 55.3             | 85.8  | 2.8             | 10.2             | 105.4 | 7.0             | 65.5             | 136.8 |
| 1993–1997       | 5.8             | 24.4             | 99.6  | 6.2             | 76.7             | 147.3 | 2.8             | 10.5             | 124.0 | 6.6             | 49.3             | 143.1 |
| 1998–2002       | 6.0             | 29.4             | 83.4  | 3.0             | 37.8             | 71.7  | 2.4             | 10.8             | 104.8 | 7.0             | 41.7             | 134.2 |
| 2003–2007       | 10.4            | 45.3             | 113.0 | 3.2             | 30.8             | 68.4  | 2.2             | 11.2             | 88.8  | 5.4             | 26.1             | 116.4 |
| 2008–2012       | 11.0            | 42.8             | 114.9 | 5.4             | 37.0             | 89.3  | 4.0             | 15.4             | 113.9 | 3.8             | 16.5             | 85.7  |

Secondary Medical Zone ID: 076

|           | Male            |                  |       |                 |                  |       | Female          |                  |       |                 |                  |       |
|-----------|-----------------|------------------|-------|-----------------|------------------|-------|-----------------|------------------|-------|-----------------|------------------|-------|
|           | Suicide         |                  |       | Suicide         |                  |       | Suicide         |                  |       | Suicide         |                  |       |
|           | Num<br>per year | Rate<br>/100,000 | × 100 | Num<br>per year | Rate<br>/100,000 | × 100 | Num<br>per year | Rate<br>/100,000 | × 100 | Num<br>per year | Rate<br>/100,000 | × 100 |
|           |                 |                  |       |                 |                  |       |                 |                  |       |                 |                  |       |
|           | Total (>10 y/o) |                  |       | 45–54           |                  |       | Total (>10 y/o) |                  |       | 45–54           |                  |       |
| 1983–1987 | 53.4            | 32.8             | 101.2 | 12.6            | 49.5             | 97.9  | 33.2            | 17.2             | 117.0 | 5.8             | 20.6             | 119.6 |
| 1988–1992 | 35.4            | 21.3             | 82.2  | 8.2             | 29.5             | 85.9  | 27.0            | 12.7             | 102.4 | 4.0             | 14.3             | 97.9  |
| 1993–1997 | 41.2            | 22.2             | 86.5  | 9.0             | 29.3             | 80.0  | 24.8            | 10.9             | 102.6 | 3.8             | 12.2             | 94.3  |
| 1998–2002 | 71.8            | 35.3             | 98.7  | 17.2            | 53.2             | 95.0  | 29.8            | 12.9             | 102.0 | 4.2             | 13.8             | 91.6  |
| 2003–2007 | 74.0            | 36.3             | 99.2  | 13.6            | 49.3             | 88.2  | 28.2            | 12.6             | 99.1  | 3.4             | 12.8             | 93.5  |
| 2008–2012 | 75.2            | 36.7             | 107.2 | 13.2            | 50.7             | 104.3 | 27.4            | 12.7             | 96.7  | 2.6             | 12.1             | 81.1  |
|           | 15–24           |                  |       | 55–64           |                  |       | 15–24           |                  |       | 55–64           |                  |       |
| 1983–1987 | 2.4             | 10.5             | 75.5  | 8.6             | 43.3             | 102.0 | 2.2             | 7.8              | 113.9 | 4.6             | 20.4             | 103.2 |
| 1988–1992 | 3.2             | 10.5             | 106.0 | 4.8             | 23.9             | 67.4  | 1.4             | 5.0              | 95.2  | 4.8             | 19.1             | 106.7 |
| 1993–1997 | 3.0             | 10.8             | 95.2  | 11.8            | 46.1             | 114.5 | 2.2             | 6.6              | 127.4 | 4.6             | 17.3             | 109.0 |
| 1998–2002 | 5.0             | 18.5             | 117.2 | 16.2            | 59.7             | 94.0  | 1.8             | 7.3              | 103.3 | 4.4             | 16.9             | 89.8  |
| 2003–2007 | 4.6             | 19.4             | 111.4 | 18.2            | 57.9             | 100.4 | 2.2             | 9.8              | 109.3 | 4.4             | 14.9             | 89.1  |
| 2008–2012 | 5.8             | 25.7             | 121.3 | 16.0            | 50.1             | 103.2 | 2.4             | 11.2             | 115.8 | 5.2             | 15.6             | 104.5 |
|           | 25–34           |                  |       | 65–74           |                  |       | 25–34           |                  |       | 65–74           |                  |       |
| 1983–1987 | 6.6             | 24.5             | 95.7  | 5.4             | 46.3             | 105.7 | 4.2             | 13.8             | 127.8 | 4.8             | 31.3             | 100.2 |
| 1988–1992 | 5.0             | 19.2             | 100.3 | 3.8             | 30.0             | 85.0  | 1.2             | 6.4              | 73.6  | 5.6             | 29.9             | 114.5 |
| 1993–1997 | 3.8             | 15.3             | 78.5  | 4.6             | 27.8             | 87.0  | 2.4             | 8.7              | 104.8 | 4.4             | 20.6             | 105.6 |
| 1998–2002 | 8.8             | 28.6             | 105.8 | 9.0             | 44.6             | 98.1  | 4.4             | 13.7             | 117.9 | 5.2             | 22.0             | 104.9 |
| 2003–2007 | 7.6             | 27.2             | 87.7  | 9.4             | 42.6             | 99.4  | 5.2             | 16.3             | 125.2 | 3.8             | 16.5             | 88.7  |
| 2008–2012 | 6.8             | 29.2             | 89.6  | 9.2             | 37.9             | 96.1  | 3.2             | 13.7             | 95.9  | 5.2             | 18.9             | 106.1 |
|           | 35–44           |                  |       | >74 y/o         |                  |       | 35–44           |                  |       | >74 y/o         |                  |       |
| 1983–1987 | 10.8            | 31.9             | 100.1 | 6.8             | 101.3            | 129.4 | 5.2             | 14.3             | 121.0 | 6.4             | 66.0             | 114.5 |
| 1988–1992 | 4.2             | 14.9             | 62.7  | 5.8             | 71.1             | 110.2 | 3.0             | 9.4              | 97.2  | 6.8             | 52.2             | 109.0 |
| 1993–1997 | 5.4             | 20.0             | 81.5  | 3.4             | 39.0             | 75.0  | 1.0             | 5.5              | 64.4  | 6.2             | 37.5             | 109.0 |
| 1998–2002 | 8.6             | 32.9             | 93.3  | 6.8             | 56.2             | 106.5 | 3.2             | 11.6             | 112.3 | 6.6             | 32.1             | 103.5 |
| 2003–2007 | 13.2            | 45.8             | 114.3 | 7.4             | 46.9             | 104.2 | 2.8             | 11.3             | 89.3  | 6.4             | 24.7             | 110.3 |
| 2008–2012 | 15.6            | 46.4             | 124.8 | 8.6             | 44.5             | 107.2 | 3.6             | 12.6             | 92.8  | 5.2             | 17.6             | 91.6  |

Secondary Medical Zone ID: 077

|           | Male            |          |       |          |          |       | Female          |          |       |          |          |       |
|-----------|-----------------|----------|-------|----------|----------|-------|-----------------|----------|-------|----------|----------|-------|
|           | Suicide         |          |       | Suicide  |          |       | Suicide         |          |       | Suicide  |          |       |
|           | Num             | Rate     | × 100 | Num      | Rate     | × 100 | Num             | Rate     | × 100 | Num      | Rate     | × 100 |
|           | per year        | /100,000 |       | per year | /100,000 |       | per year        | /100,000 |       | per year | /100,000 |       |
|           | Total (>10 y/o) |          |       | 45–54    |          |       | Total (>10 y/o) |          |       | 45–54    |          |       |
| 1983–1987 | 18.2            | 35.6     | 116.9 | 4.2      | 54.7     | 108.1 | 11.2            | 17.3     | 125.8 | 1.4      | 17.9     | 104.0 |
| 1988–1992 | 14.2            | 25.9     | 110.5 | 3.0      | 36.6     | 106.4 | 10.8            | 14.7     | 128.4 | 1.2      | 14.9     | 102.0 |
| 1993–1997 | 14.6            | 25.2     | 104.6 | 3.6      | 38.0     | 103.8 | 9.0             | 11.7     | 119.8 | 1.4      | 13.9     | 107.8 |
| 1998–2002 | 17.8            | 33.7     | 88.7  | 5.6      | 56.9     | 101.7 | 8.6             | 12.9     | 102.5 | 1.4      | 15.1     | 100.5 |
| 2003–2007 | 22.6            | 37.3     | 105.5 | 4.6      | 54.1     | 96.8  | 8.6             | 12.7     | 104.0 | 1.4      | 14.7     | 107.3 |
| 2008–2012 | 19.0            | 34.0     | 97.7  | 3.4      | 47.2     | 97.2  | 7.8             | 12.3     | 99.3  | 1.2      | 15.5     | 104.0 |
|           | 15–24           |          |       | 55–64    |          |       | 15–24           |          |       | 55–64    |          |       |
| 1983–1987 | 1.8             | 19.1     | 136.6 | 1.8      | 36.2     | 85.2  | 0.4             | 6.6      | 96.0  | 2.4      | 25.5     | 129.1 |
| 1988–1992 | 1.8             | 13.6     | 137.1 | 2.0      | 31.8     | 89.6  | 1.0             | 7.3      | 138.6 | 1.4      | 18.3     | 102.5 |
| 1993–1997 | 1.4             | 13.2     | 116.3 | 2.2      | 35.4     | 88.0  | 0.4             | 5.2      | 100.0 | 1.0      | 15.0     | 94.4  |
| 1998–2002 | 1.0             | 15.3     | 96.7  | 3.8      | 55.5     | 87.4  | 0.0             | 5.3      | 75.8  | 1.4      | 18.5     | 98.5  |
| 2003–2007 | 1.4             | 19.0     | 108.8 | 4.8      | 55.5     | 96.1  | 0.2             | 7.3      | 81.6  | 0.8      | 14.4     | 86.0  |
| 2008–2012 | 0.4             | 17.1     | 80.7  | 3.2      | 40.8     | 84.1  | 0.0             | 7.0      | 72.3  | 1.4      | 14.9     | 100.1 |
|           | 25–34           |          |       | 65–74    |          |       | 25–34           |          |       | 65–74    |          |       |
| 1983–1987 | 2.8             | 30.7     | 120.0 | 2.8      | 60.8     | 138.9 | 1.2             | 12.5     | 116.1 | 1.2      | 28.9     | 92.5  |
| 1988–1992 | 2.0             | 23.4     | 122.6 | 1.4      | 34.6     | 98.1  | 0.8             | 9.5      | 109.8 | 1.8      | 29.4     | 112.8 |
| 1993–1997 | 1.8             | 22.1     | 113.0 | 3.0      | 44.2     | 138.5 | 0.6             | 8.4      | 101.2 | 1.6      | 22.0     | 112.7 |
| 1998–2002 | 1.0             | 21.7     | 80.5  | 1.6      | 36.1     | 79.4  | 1.4             | 13.7     | 117.8 | 1.0      | 18.2     | 86.6  |
| 2003–2007 | 3.6             | 38.3     | 123.5 | 2.6      | 41.8     | 97.5  | 0.8             | 12.5     | 95.9  | 1.6      | 20.1     | 107.9 |
| 2008–2012 | 2.6             | 34.7     | 106.5 | 2.6      | 39.0     | 98.7  | 0.4             | 12.3     | 85.5  | 1.4      | 18.2     | 102.3 |
|           | 35–44           |          |       | >74 y/o  |          |       | 35–44           |          |       | >74 y/o  |          |       |
| 1983–1987 | 3.0             | 32.9     | 103.5 | 1.6      | 80.4     | 102.6 | 1.6             | 14.1     | 119.0 | 3.0      | 87.8     | 152.2 |
| 1988–1992 | 1.8             | 21.2     | 89.3  | 2.2      | 79.4     | 123.1 | 1.2             | 10.8     | 111.5 | 3.4      | 74.9     | 156.6 |
| 1993–1997 | 1.0             | 17.5     | 71.5  | 1.6      | 54.6     | 104.9 | 0.8             | 8.9      | 105.1 | 3.2      | 56.1     | 162.9 |
| 1998–2002 | 2.6             | 34.6     | 98.3  | 2.2      | 57.7     | 109.5 | 1.2             | 12.2     | 117.9 | 2.2      | 34.4     | 110.7 |
| 2003–2007 | 3.0             | 40.6     | 101.2 | 2.6      | 50.6     | 112.4 | 1.2             | 13.8     | 109.2 | 2.6      | 29.8     | 133.0 |
| 2008–2012 | 4.0             | 43.1     | 115.8 | 2.8      | 45.8     | 110.4 | 1.0             | 13.5     | 99.8  | 2.4      | 23.5     | 122.1 |

Secondary Medical Zone ID: 078

|           | Male            |                  |       |                 |                  |       | Female          |                  |       |                 |                  |       |
|-----------|-----------------|------------------|-------|-----------------|------------------|-------|-----------------|------------------|-------|-----------------|------------------|-------|
|           | Suicide         |                  |       | Suicide         |                  |       | Suicide         |                  |       | Suicide         |                  |       |
|           | Num<br>per year | Rate<br>/100,000 | × 100 | Num<br>per year | Rate<br>/100,000 | × 100 | Num<br>per year | Rate<br>/100,000 | × 100 | Num<br>per year | Rate<br>/100,000 | × 100 |
|           |                 |                  |       |                 |                  |       |                 |                  |       |                 |                  |       |
|           | Total (>10 y/o) |                  |       | 45–54           |                  |       | Total (>10 y/o) |                  |       | 45–54           |                  |       |
| 1983–1987 | 12.4            | 35.7             | 118.8 | 3.2             | 58.5             | 115.7 | 9.6             | 18.3             | 144.6 | 1.2             | 19.3             | 112.1 |
| 1988–1992 | 10.6            | 27.0             | 120.8 | 1.8             | 34.4             | 100.2 | 9.0             | 15.5             | 145.5 | 1.0             | 15.7             | 107.6 |
| 1993–1997 | 8.8             | 24.6             | 99.6  | 1.8             | 34.1             | 93.2  | 7.4             | 12.3             | 135.2 | 1.0             | 14.0             | 108.4 |
| 1998–2002 | 14.6            | 36.4             | 107.0 | 3.0             | 52.6             | 94.0  | 7.4             | 13.4             | 119.9 | 0.4             | 13.2             | 87.5  |
| 2003–2007 | 15.0            | 36.6             | 111.4 | 2.4             | 51.1             | 91.4  | 5.6             | 12.6             | 105.4 | 0.4             | 12.5             | 90.9  |
| 2008–2012 | 14.6            | 36.3             | 114.4 | 2.6             | 52.6             | 108.2 | 3.4             | 12.0             | 88.4  | 0.2             | 12.8             | 85.5  |
|           | 15–24           |                  |       | 55–64           |                  |       | 15–24           |                  |       | 55–64           |                  |       |
| 1983–1987 | 0.8             | 15.2             | 109.1 | 2.0             | 46.4             | 109.2 | 0.4             | 7.2              | 105.0 | 1.8             | 25.8             | 130.5 |
| 1988–1992 | 0.4             | 9.5              | 96.1  | 1.0             | 30.2             | 85.1  | 0.2             | 5.0              | 94.9  | 0.8             | 17.7             | 99.3  |
| 1993–1997 | 1.4             | 14.6             | 129.2 | 1.2             | 34.6             | 86.0  | 0.2             | 5.0              | 95.7  | 1.6             | 20.9             | 131.6 |
| 1998–2002 | 0.8             | 16.4             | 103.6 | 3.0             | 61.6             | 96.9  | 0.6             | 8.2              | 116.5 | 1.4             | 21.0             | 111.3 |
| 2003–2007 | 1.0             | 19.5             | 111.6 | 3.8             | 62.9             | 108.9 | 0.4             | 9.4              | 104.6 | 0.6             | 15.4             | 92.1  |
| 2008–2012 | 0.4             | 19.5             | 91.9  | 3.2             | 51.2             | 105.4 | 0.4             | 10.3             | 105.8 | 0.2             | 12.4             | 83.4  |
|           | 25–34           |                  |       | 65–74           |                  |       | 25–34           |                  |       | 65–74           |                  |       |
| 1983–1987 | 0.6             | 20.9             | 81.8  | 1.6             | 52.6             | 120.1 | 1.2             | 14.3             | 132.5 | 0.8             | 29.2             | 93.4  |
| 1988–1992 | 1.4             | 23.4             | 122.5 | 1.4             | 41.1             | 116.7 | 0.6             | 9.7              | 111.5 | 2.0             | 37.9             | 145.5 |
| 1993–1997 | 0.2             | 14.9             | 76.4  | 1.6             | 38.2             | 119.8 | 0.2             | 7.6              | 91.8  | 2.2             | 32.0             | 164.3 |
| 1998–2002 | 1.6             | 28.5             | 105.6 | 2.4             | 51.6             | 113.4 | 0.4             | 11.0             | 95.1  | 2.2             | 30.4             | 144.9 |
| 2003–2007 | 2.0             | 34.8             | 112.2 | 2.2             | 47.3             | 110.3 | 0.4             | 12.3             | 94.3  | 1.4             | 22.2             | 119.1 |
| 2008–2012 | 1.8             | 36.1             | 110.9 | 2.2             | 43.5             | 110.0 | 0.0             | 11.9             | 83.0  | 0.6             | 16.7             | 94.0  |
|           | 35–44           |                  |       | >74 y/o         |                  |       | 35–44           |                  |       | >74 y/o         |                  |       |
| 1983–1987 | 2.4             | 35.9             | 112.9 | 1.8             | 101.3            | 129.3 | 2.2             | 18.2             | 153.8 | 2.0             | 80.7             | 140.0 |
| 1988–1992 | 2.6             | 31.7             | 133.8 | 2.0             | 88.6             | 137.4 | 1.0             | 11.2             | 116.4 | 3.4             | 93.9             | 196.3 |
| 1993–1997 | 1.2             | 23.8             | 97.3  | 1.4             | 61.8             | 118.6 | 0.0             | 6.6              | 77.4  | 2.2             | 53.2             | 154.6 |
| 1998–2002 | 1.6             | 34.8             | 98.9  | 2.2             | 70.8             | 134.4 | 0.2             | 9.1              | 88.3  | 2.2             | 44.0             | 141.6 |
| 2003–2007 | 0.8             | 29.7             | 74.2  | 2.8             | 66.7             | 148.0 | 0.4             | 11.9             | 94.5  | 2.0             | 32.4             | 144.3 |
| 2008–2012 | 2.4             | 40.7             | 109.4 | 1.8             | 45.5             | 109.6 | 0.4             | 12.6             | 93.2  | 1.6             | 23.4             | 121.7 |

Secondary Medical Zone ID: 079

|           | Male            |          |       |          |          |       | Female          |          |       |          |          |       |
|-----------|-----------------|----------|-------|----------|----------|-------|-----------------|----------|-------|----------|----------|-------|
|           | Suicide         |          |       | Suicide  |          |       | Suicide         |          |       | Suicide  |          |       |
|           | Num             | Rate     | × 100 | Num      | Rate     | × 100 | Num             | Rate     | × 100 | Num      | Rate     | × 100 |
|           | per year        | /100,000 |       | per year | /100,000 |       | per year        | /100,000 |       | per year | /100,000 |       |
|           | Total (>10 y/o) |          |       | 45–54    |          |       | Total (>10 y/o) |          |       | 45–54    |          |       |
| 1983–1987 | 15.4            | 36.2     | 121.5 | 4.0      | 61.7     | 122.0 | 10.6            | 18.2     | 135.3 | 0.8      | 16.3     | 94.7  |
| 1988–1992 | 11.8            | 26.2     | 115.5 | 2.2      | 36.2     | 105.5 | 9.4             | 14.4     | 133.0 | 0.8      | 14.6     | 100.0 |
| 1993–1997 | 14.0            | 28.0     | 126.6 | 2.4      | 37.1     | 101.5 | 7.8             | 12.1     | 126.6 | 1.2      | 14.7     | 113.5 |
| 1998–2002 | 21.4            | 41.2     | 133.0 | 6.0      | 73.7     | 131.8 | 9.2             | 13.7     | 126.2 | 1.6      | 17.7     | 117.5 |
| 2003–2007 | 18.4            | 39.5     | 120.2 | 3.8      | 61.4     | 109.7 | 8.0             | 13.2     | 119.5 | 0.6      | 13.1     | 95.4  |
| 2008–2012 | 14.8            | 35.2     | 108.8 | 2.6      | 50.7     | 104.3 | 7.2             | 13.1     | 113.9 | 0.8      | 15.4     | 103.0 |
|           | 15–24           |          |       | 55–64    |          |       | 15–24           |          |       | 55–64    |          |       |
| 1983–1987 | 0.6             | 13.4     | 95.8  | 2.6      | 45.3     | 106.5 | 0.4             | 7.0      | 102.5 | 1.0      | 18.6     | 94.4  |
| 1988–1992 | 0.4             | 9.4      | 95.3  | 2.0      | 34.9     | 98.2  | 0.4             | 5.7      | 108.1 | 1.8      | 21.6     | 120.8 |
| 1993–1997 | 1.0             | 13.0     | 114.9 | 3.4      | 49.8     | 123.8 | 0.2             | 4.9      | 94.8  | 0.6      | 14.2     | 89.6  |
| 1998–2002 | 0.4             | 14.3     | 90.6  | 3.2      | 61.1     | 96.2  | 0.4             | 7.3      | 104.5 | 2.0      | 23.2     | 123.2 |
| 2003–2007 | 0.6             | 17.2     | 98.5  | 4.2      | 63.3     | 109.7 | 0.0             | 7.2      | 79.8  | 1.4      | 18.4     | 110.0 |
| 2008–2012 | 0.8             | 22.1     | 104.0 | 2.8      | 46.4     | 95.5  | 0.0             | 7.9      | 81.4  | 0.8      | 14.5     | 97.1  |
|           | 25–34           |          |       | 65–74    |          |       | 25–34           |          |       | 65–74    |          |       |
| 1983–1987 | 1.8             | 28.1     | 109.9 | 2.2      | 56.1     | 128.1 | 1.6             | 15.7     | 145.7 | 2.4      | 43.0     | 137.7 |
| 1988–1992 | 1.4             | 22.7     | 118.8 | 2.4      | 48.2     | 136.8 | 0.4             | 8.6      | 99.3  | 2.2      | 35.3     | 135.3 |
| 1993–1997 | 1.4             | 23.1     | 118.2 | 1.2      | 29.0     | 91.0  | 0.4             | 8.4      | 100.9 | 2.2      | 28.3     | 145.1 |
| 1998–2002 | 1.8             | 30.2     | 111.9 | 4.4      | 63.6     | 139.8 | 0.6             | 11.8     | 102.2 | 1.4      | 22.4     | 106.6 |
| 2003–2007 | 1.2             | 29.5     | 95.3  | 2.2      | 44.1     | 102.8 | 0.8             | 14.1     | 108.4 | 1.4      | 21.0     | 112.6 |
| 2008–2012 | 1.6             | 35.1     | 107.8 | 1.8      | 38.7     | 97.9  | 0.4             | 13.9     | 96.9  | 1.6      | 21.2     | 119.0 |
|           | 35–44           |          |       | >74 y/o  |          |       | 35–44           |          |       | >74 y/o  |          |       |
| 1983–1987 | 2.0             | 31.7     | 99.6  | 2.2      | 99.6     | 127.2 | 1.6             | 15.4     | 130.8 | 2.8      | 86.4     | 149.7 |
| 1988–1992 | 1.6             | 23.7     | 100.0 | 1.8      | 74.4     | 115.4 | 0.4             | 9.0      | 92.7  | 3.2      | 76.2     | 159.3 |
| 1993–1997 | 2.0             | 28.8     | 117.5 | 2.6      | 78.7     | 151.1 | 1.0             | 10.8     | 127.0 | 2.0      | 42.3     | 122.9 |
| 1998–2002 | 3.0             | 46.0     | 130.6 | 2.6      | 67.7     | 128.3 | 0.2             | 8.9      | 86.5  | 3.0      | 46.2     | 148.8 |
| 2003–2007 | 2.8             | 50.4     | 125.7 | 3.6      | 66.3     | 147.2 | 0.6             | 12.8     | 101.0 | 3.2      | 38.1     | 169.6 |
| 2008–2012 | 1.6             | 36.5     | 98.2  | 3.6      | 57.9     | 139.7 | 0.6             | 13.5     | 99.8  | 3.0      | 30.1     | 156.7 |



Secondary Medical Zone ID: 080

|           | Male            |                  |       |                 |                  |       | Female          |                  |       |                 |                  |       |
|-----------|-----------------|------------------|-------|-----------------|------------------|-------|-----------------|------------------|-------|-----------------|------------------|-------|
|           | Suicide         |                  |       | Suicide         |                  |       | Suicide         |                  |       | Suicide         |                  |       |
|           | Num<br>per year | Rate<br>/100,000 | × 100 | Num<br>per year | Rate<br>/100,000 | × 100 | Num<br>per year | Rate<br>/100,000 | × 100 | Num<br>per year | Rate<br>/100,000 | × 100 |
|           |                 |                  |       |                 |                  |       |                 |                  |       |                 |                  |       |
|           | Total (>10 y/o) |                  |       | 45–54           |                  |       | Total (>10 y/o) |                  |       | 45–54           |                  |       |
| 1983–1987 | 17.0            | 40.4             | 146.4 | 3.8             | 63.5             | 125.6 | 7.6             | 16.6             | 118.3 | 0.6             | 15.9             | 92.5  |
| 1988–1992 | 9.6             | 25.5             | 111.5 | 1.8             | 35.9             | 104.4 | 8.4             | 14.5             | 134.6 | 0.6             | 14.3             | 97.8  |
| 1993–1997 | 12.4            | 28.1             | 130.3 | 1.8             | 36.5             | 99.7  | 9.0             | 13.1             | 153.6 | 0.2             | 11.2             | 86.6  |
| 1998–2002 | 13.4            | 36.2             | 107.0 | 3.2             | 58.5             | 104.5 | 7.8             | 14.0             | 125.9 | 0.6             | 14.5             | 96.4  |
| 2003–2007 | 16.4            | 39.6             | 127.7 | 2.0             | 48.5             | 86.6  | 5.2             | 12.6             | 105.1 | 0.8             | 14.6             | 106.6 |
| 2008–2012 | 12.0            | 34.2             | 108.3 | 1.4             | 43.8             | 90.0  | 5.0             | 13.2             | 105.6 | 0.2             | 13.2             | 88.4  |
|           | 15–24           |                  |       | 55–64           |                  |       | 15–24           |                  |       | 55–64           |                  |       |
| 1983–1987 | 1.2             | 18.5             | 132.6 | 2.6             | 48.7             | 114.7 | 0.8             | 9.0              | 131.3 | 1.4             | 21.8             | 110.2 |
| 1988–1992 | 0.4             | 9.9              | 100.3 | 2.0             | 37.3             | 105.1 | 0.2             | 5.3              | 100.1 | 2.0             | 23.5             | 131.4 |
| 1993–1997 | 0.2             | 10.3             | 91.3  | 1.4             | 35.8             | 89.0  | 0.2             | 5.3              | 100.9 | 1.8             | 21.9             | 137.5 |
| 1998–2002 | 1.2             | 19.5             | 123.3 | 1.8             | 52.5             | 82.7  | 0.4             | 7.7              | 109.7 | 2.0             | 24.1             | 128.1 |
| 2003–2007 | 1.2             | 21.4             | 122.6 | 2.4             | 53.8             | 93.2  | 0.4             | 9.8              | 109.0 | 0.4             | 15.1             | 90.1  |
| 2008–2012 | 0.2             | 19.3             | 90.9  | 2.6             | 49.1             | 101.1 | 0.2             | 9.5              | 98.4  | 0.8             | 15.1             | 101.3 |
|           | 25–34           |                  |       | 65–74           |                  |       | 25–34           |                  |       | 65–74           |                  |       |
| 1983–1987 | 1.2             | 25.5             | 99.6  | 1.8             | 51.5             | 117.7 | 0.2             | 9.3              | 86.9  | 1.2             | 31.5             | 100.9 |
| 1988–1992 | 0.8             | 19.3             | 100.9 | 2.0             | 45.7             | 129.6 | 0.8             | 10.8             | 124.6 | 1.2             | 26.7             | 102.2 |
| 1993–1997 | 1.2             | 23.0             | 117.6 | 2.8             | 48.8             | 153.1 | 0.6             | 9.6              | 115.8 | 2.2             | 29.9             | 153.5 |
| 1998–2002 | 1.4             | 29.7             | 109.8 | 3.0             | 55.0             | 120.9 | 0.6             | 12.5             | 107.6 | 2.2             | 29.3             | 139.5 |
| 2003–2007 | 2.6             | 42.9             | 138.3 | 3.2             | 56.1             | 130.9 | 0.4             | 13.0             | 100.0 | 1.4             | 22.0             | 118.0 |
| 2008–2012 | 1.0             | 33.4             | 102.6 | 3.0             | 50.7             | 128.3 | 0.8             | 16.6             | 116.0 | 0.8             | 17.9             | 100.8 |
|           | 35–44           |                  |       | >74 y/o         |                  |       | 35–44           |                  |       | >74 y/o         |                  |       |
| 1983–1987 | 3.0             | 43.2             | 135.7 | 3.4             | 139.0            | 177.5 | 1.2             | 14.5             | 123.0 | 2.2             | 79.8             | 138.4 |
| 1988–1992 | 0.6             | 19.1             | 80.4  | 2.0             | 81.9             | 126.9 | 1.2             | 12.4             | 128.3 | 2.4             | 66.2             | 138.3 |
| 1993–1997 | 2.0             | 31.4             | 128.0 | 2.6             | 81.8             | 157.1 | 0.6             | 9.6              | 112.5 | 3.4             | 67.7             | 196.8 |
| 1998–2002 | 1.2             | 33.0             | 93.6  | 1.6             | 54.9             | 104.1 | 0.6             | 11.4             | 109.9 | 1.4             | 30.0             | 96.8  |
| 2003–2007 | 2.0             | 46.0             | 114.8 | 3.0             | 63.9             | 142.0 | 0.0             | 10.6             | 84.0  | 1.8             | 27.5             | 122.7 |
| 2008–2012 | 0.6             | 32.5             | 87.2  | 3.0             | 55.8             | 134.4 | 0.6             | 14.2             | 104.7 | 1.6             | 21.9             | 114.0 |

Secondary Medical Zone ID: 081

|           | Male            |          |       |          |          |       | Female          |          |       |          |          |       |
|-----------|-----------------|----------|-------|----------|----------|-------|-----------------|----------|-------|----------|----------|-------|
|           | Suicide         |          |       | Suicide  |          |       | Suicide         |          |       | Suicide  |          |       |
|           | Num             | Rate     | × 100 | Num      | Rate     | × 100 | Num             | Rate     | × 100 | Num      | Rate     | × 100 |
|           | per year        | /100,000 |       | per year | /100,000 |       | per year        | /100,000 |       | per year | /100,000 |       |
|           | Total (>10 y/o) |          |       | 45–54    |          |       | Total (>10 y/o) |          |       | 45–54    |          |       |
| 1983–1987 | 18.2            | 36.4     | 122.7 | 5.0      | 63.5     | 125.5 | 12.8            | 18.6     | 142.3 | 1.2      | 17.2     | 99.7  |
| 1988–1992 | 14.6            | 27.2     | 123.3 | 1.6      | 30.1     | 87.5  | 10.6            | 14.6     | 131.8 | 1.2      | 15.6     | 106.6 |
| 1993–1997 | 21.2            | 32.0     | 158.6 | 4.6      | 48.8     | 133.5 | 9.6             | 12.1     | 132.4 | 1.0      | 13.4     | 103.5 |
| 1998–2002 | 23.2            | 40.4     | 128.2 | 6.6      | 72.3     | 129.2 | 9.6             | 13.4     | 118.8 | 1.8      | 17.8     | 118.5 |
| 2003–2007 | 25.6            | 45.8     | 143.9 | 5.6      | 71.6     | 128.1 | 10.4            | 14.4     | 129.8 | 1.8      | 17.3     | 126.4 |
| 2008–2012 | 26.2            | 43.1     | 152.6 | 5.6      | 70.5     | 145.2 | 8.8             | 13.9     | 118.3 | 0.8      | 14.7     | 98.3  |
| -----     |                 |          |       |          |          |       |                 |          |       |          |          |       |
|           | 15–24           |          |       | 55–64    |          |       | 15–24           |          |       | 55–64    |          |       |
| 1983–1987 | 1.2             | 16.4     | 117.7 | 3.2      | 46.4     | 109.1 | 1.0             | 9.1      | 133.4 | 1.8      | 21.6     | 109.7 |
| 1988–1992 | 0.8             | 10.8     | 108.8 | 2.0      | 32.1     | 90.5  | 0.4             | 5.6      | 106.9 | 2.0      | 21.0     | 117.8 |
| 1993–1997 | 1.0             | 12.7     | 112.4 | 4.2      | 52.2     | 129.8 | 0.2             | 4.9      | 93.5  | 1.2      | 16.5     | 103.7 |
| 1998–2002 | 1.4             | 18.7     | 118.3 | 4.6      | 70.7     | 111.2 | 0.2             | 6.5      | 92.1  | 1.2      | 18.8     | 100.0 |
| 2003–2007 | 1.2             | 19.7     | 113.0 | 5.0      | 67.4     | 116.7 | 0.6             | 10.2     | 113.4 | 1.6      | 18.6     | 111.1 |
| 2008–2012 | 1.0             | 22.6     | 106.7 | 6.2      | 64.0     | 131.8 | 0.6             | 11.2     | 115.5 | 1.0      | 14.8     | 99.1  |
| -----     |                 |          |       |          |          |       |                 |          |       |          |          |       |
|           | 25–34           |          |       | 65–74    |          |       | 25–34           |          |       | 65–74    |          |       |
| 1983–1987 | 1.2             | 21.6     | 84.4  | 2.4      | 55.6     | 127.1 | 0.8             | 11.1     | 103.5 | 3.0      | 46.8     | 149.7 |
| 1988–1992 | 2.0             | 25.2     | 131.7 | 3.4      | 55.9     | 158.7 | 0.4             | 8.2      | 94.6  | 2.0      | 30.9     | 118.6 |
| 1993–1997 | 2.4             | 27.9     | 142.8 | 3.8      | 51.4     | 161.0 | 0.4             | 8.1      | 97.4  | 2.4      | 27.3     | 140.2 |
| 1998–2002 | 2.4             | 32.4     | 119.9 | 2.8      | 46.4     | 102.0 | 0.0             | 9.1      | 78.8  | 0.6      | 15.7     | 74.6  |
| 2003–2007 | 4.0             | 48.1     | 155.1 | 1.6      | 36.2     | 84.4  | 1.2             | 15.6     | 119.9 | 1.2      | 18.6     | 100.1 |
| 2008–2012 | 3.8             | 47.6     | 146.2 | 1.8      | 37.8     | 95.8  | 0.0             | 11.7     | 81.6  | 1.4      | 19.4     | 109.2 |
| -----     |                 |          |       |          |          |       |                 |          |       |          |          |       |
|           | 35–44           |          |       | >74 y/o  |          |       | 35–44           |          |       | >74 y/o  |          |       |
| 1983–1987 | 2.6             | 33.8     | 106.3 | 2.6      | 106.7    | 136.2 | 2.4             | 18.0     | 152.2 | 2.6      | 78.6     | 136.2 |
| 1988–1992 | 2.6             | 28.3     | 119.4 | 2.2      | 79.2     | 122.7 | 0.8             | 10.0     | 103.9 | 3.8      | 81.3     | 169.8 |
| 1993–1997 | 2.8             | 31.7     | 129.4 | 2.4      | 70.4     | 135.3 | 0.6             | 8.6      | 101.6 | 3.8      | 63.0     | 183.1 |
| 1998–2002 | 2.4             | 37.6     | 106.8 | 2.8      | 66.9     | 126.9 | 1.2             | 12.9     | 124.9 | 4.4      | 57.2     | 184.3 |
| 2003–2007 | 5.0             | 67.8     | 169.2 | 3.2      | 58.1     | 129.0 | 1.2             | 14.9     | 117.9 | 2.8      | 31.0     | 138.3 |
| 2008–2012 | 3.6             | 47.1     | 126.7 | 4.2      | 60.6     | 146.0 | 1.6             | 17.2     | 126.6 | 3.4      | 29.9     | 155.3 |

Secondary Medical Zone ID: 082

|           | Male            |          |       |          |          |       | Female          |          |       |          |          |       |
|-----------|-----------------|----------|-------|----------|----------|-------|-----------------|----------|-------|----------|----------|-------|
|           | Suicide         |          |       | Suicide  |          |       | Suicide         |          |       | Suicide  |          |       |
|           | Num             | Rate     | × 100 | Num      | Rate     | × 100 | Num             | Rate     | × 100 | Num      | Rate     | × 100 |
|           | per year        | /100,000 |       | per year | /100,000 |       | per year        | /100,000 |       | per year | /100,000 |       |
|           | Total (>10 y/o) |          |       | 45–54    |          |       | Total (>10 y/o) |          |       | 45–54    |          |       |
| 1983–1987 | 23.8            | 31.8     | 96.4  | 6.4      | 52.4     | 103.6 | 19.0            | 18.6     | 135.0 | 3.8      | 24.0     | 139.1 |
| 1988–1992 | 20.8            | 24.5     | 98.7  | 5.6      | 38.3     | 111.5 | 14.2            | 13.5     | 111.1 | 1.8      | 14.3     | 97.6  |
| 1993–1997 | 28.2            | 27.0     | 113.7 | 7.4      | 41.4     | 113.0 | 14.6            | 11.6     | 118.7 | 2.4      | 13.9     | 107.9 |
| 1998–2002 | 36.2            | 35.0     | 96.1  | 8.6      | 51.5     | 91.9  | 14.2            | 12.2     | 97.9  | 2.6      | 15.3     | 101.9 |
| 2003–2007 | 37.8            | 35.7     | 95.3  | 8.6      | 55.6     | 99.4  | 13.4            | 11.8     | 93.7  | 0.8      | 10.0     | 73.1  |
| 2008–2012 | 41.6            | 35.7     | 107.6 | 8.2      | 53.1     | 109.2 | 14.2            | 12.6     | 96.2  | 1.4      | 12.7     | 85.1  |
| -----     |                 |          |       |          |          |       |                 |          |       |          |          |       |
|           | 15–24           |          |       | 55–64    |          |       | 15–24           |          |       | 55–64    |          |       |
| 1983–1987 | 2.4             | 17.1     | 122.6 | 2.8      | 35.6     | 83.8  | 2.0             | 10.4     | 152.7 | 2.0      | 19.6     | 99.3  |
| 1988–1992 | 0.8             | 8.1      | 81.9  | 2.6      | 27.8     | 78.3  | 1.0             | 6.0      | 114.5 | 1.8      | 16.9     | 94.4  |
| 1993–1997 | 3.4             | 16.0     | 141.5 | 4.0      | 35.9     | 89.1  | 0.2             | 3.7      | 70.3  | 2.8      | 19.4     | 122.1 |
| 1998–2002 | 4.2             | 22.6     | 143.1 | 7.6      | 57.9     | 91.1  | 0.8             | 6.6      | 94.3  | 2.0      | 17.1     | 90.6  |
| 2003–2007 | 1.6             | 15.3     | 87.6  | 6.4      | 44.1     | 76.4  | 1.2             | 9.3      | 103.6 | 3.0      | 17.7     | 105.7 |
| 2008–2012 | 2.6             | 21.6     | 101.9 | 8.2      | 48.6     | 100.1 | 1.4             | 10.8     | 110.8 | 2.2      | 14.1     | 94.7  |
| -----     |                 |          |       |          |          |       |                 |          |       |          |          |       |
|           | 25–34           |          |       | 65–74    |          |       | 25–34           |          |       | 65–74    |          |       |
| 1983–1987 | 3.8             | 27.9     | 109.3 | 2.0      | 40.1     | 91.6  | 2.2             | 13.8     | 127.9 | 3.2      | 38.9     | 124.3 |
| 1988–1992 | 3.0             | 21.8     | 114.2 | 1.0      | 24.6     | 69.7  | 2.0             | 11.8     | 135.8 | 2.0      | 24.6     | 94.3  |
| 1993–1997 | 1.6             | 14.5     | 74.2  | 3.2      | 36.5     | 114.4 | 1.0             | 7.8      | 94.0  | 2.8      | 24.6     | 126.1 |
| 1998–2002 | 3.2             | 22.2     | 82.2  | 3.8      | 41.4     | 91.0  | 1.2             | 9.7      | 84.0  | 2.4      | 21.4     | 101.7 |
| 2003–2007 | 4.6             | 28.3     | 91.1  | 4.4      | 41.8     | 97.4  | 1.2             | 10.3     | 79.1  | 2.0      | 17.8     | 95.5  |
| 2008–2012 | 6.0             | 36.6     | 112.4 | 5.6      | 43.6     | 110.3 | 1.8             | 13.6     | 94.7  | 1.6      | 15.4     | 86.6  |
| -----     |                 |          |       |          |          |       |                 |          |       |          |          |       |
|           | 35–44           |          |       | >74 y/o  |          |       | 35–44           |          |       | >74 y/o  |          |       |
| 1983–1987 | 4.4             | 28.6     | 89.9  | 2.0      | 71.3     | 91.0  | 1.8             | 11.8     | 99.8  | 4.0      | 80.5     | 139.5 |
| 1988–1992 | 3.8             | 23.2     | 97.8  | 4.0      | 91.3     | 141.6 | 1.2             | 8.8      | 91.0  | 4.4      | 66.9     | 139.7 |
| 1993–1997 | 5.4             | 31.6     | 128.8 | 3.2      | 65.5     | 125.7 | 0.6             | 6.5      | 76.8  | 4.8      | 56.4     | 163.9 |
| 1998–2002 | 5.4             | 35.4     | 100.5 | 3.4      | 59.5     | 112.8 | 1.0             | 8.9      | 85.9  | 4.2      | 40.8     | 131.2 |
| 2003–2007 | 8.6             | 49.9     | 124.6 | 3.6      | 48.6     | 107.9 | 2.0             | 12.9     | 101.9 | 3.2      | 25.9     | 115.5 |
| 2008–2012 | 6.0             | 34.5     | 92.8  | 5.0      | 51.0     | 122.9 | 2.8             | 14.9     | 109.7 | 3.0      | 20.6     | 107.0 |

Secondary Medical Zone ID: 083

|           | Male            |          |       |          |          |       | Female          |          |       |          |          |       |
|-----------|-----------------|----------|-------|----------|----------|-------|-----------------|----------|-------|----------|----------|-------|
|           | Suicide         |          |       | Suicide  |          |       | Suicide         |          |       | Suicide  |          |       |
|           | Num             | Rate     | × 100 | Num      | Rate     | × 100 | Num             | Rate     | × 100 | Num      | Rate     | × 100 |
|           | per year        | /100,000 |       | per year | /100,000 |       | per year        | /100,000 |       | per year | /100,000 |       |
|           | Total (>10 y/o) |          |       | 45–54    |          |       | Total (>10 y/o) |          |       | 45–54    |          |       |
| 1983–1987 | 26.4            | 33.3     | 103.3 | 8.0      | 60.4     | 119.5 | 18.4            | 17.6     | 124.0 | 3.0      | 19.8     | 114.9 |
| 1988–1992 | 19.8            | 24.0     | 96.7  | 3.6      | 29.3     | 85.3  | 13.2            | 12.6     | 101.3 | 1.6      | 13.3     | 90.8  |
| 1993–1997 | 22.0            | 24.7     | 100.1 | 4.4      | 32.3     | 88.3  | 12.4            | 10.7     | 105.8 | 2.0      | 13.0     | 100.9 |
| 1998–2002 | 32.6            | 35.9     | 101.4 | 7.6      | 54.8     | 98.0  | 13.0            | 12.4     | 97.5  | 2.2      | 15.2     | 101.3 |
| 2003–2007 | 36.4            | 38.9     | 114.0 | 5.4      | 49.7     | 88.9  | 12.6            | 12.6     | 100.3 | 1.0      | 11.7     | 85.7  |
| 2008–2012 | 33.8            | 37.1     | 115.0 | 4.6      | 46.7     | 96.0  | 14.0            | 13.6     | 110.2 | 2.6      | 19.1     | 127.9 |
| -----     |                 |          |       |          |          |       |                 |          |       |          |          |       |
|           | 15–24           |          |       | 55–64    |          |       | 15–24           |          |       | 55–64    |          |       |
| 1983–1987 | 1.2             | 11.3     | 81.0  | 3.6      | 38.8     | 91.3  | 0.6             | 6.0      | 88.2  | 2.4      | 20.1     | 101.8 |
| 1988–1992 | 1.4             | 9.9      | 99.8  | 3.4      | 31.9     | 89.8  | 0.2             | 3.8      | 71.8  | 2.2      | 17.6     | 98.7  |
| 1993–1997 | 1.6             | 11.5     | 101.9 | 5.0      | 41.7     | 103.5 | 0.2             | 3.9      | 74.5  | 1.0      | 11.7     | 73.6  |
| 1998–2002 | 2.6             | 18.8     | 119.1 | 9.0      | 69.1     | 108.8 | 0.6             | 6.7      | 94.8  | 2.4      | 18.3     | 97.4  |
| 2003–2007 | 1.8             | 18.0     | 103.3 | 9.4      | 64.8     | 112.3 | 0.6             | 8.4      | 93.1  | 2.4      | 16.6     | 99.3  |
| 2008–2012 | 1.6             | 20.6     | 97.0  | 8.2      | 55.9     | 115.1 | 0.8             | 10.3     | 106.0 | 1.8      | 14.1     | 94.6  |
| -----     |                 |          |       |          |          |       |                 |          |       |          |          |       |
|           | 25–34           |          |       | 65–74    |          |       | 25–34           |          |       | 65–74    |          |       |
| 1983–1987 | 3.2             | 26.2     | 102.5 | 2.6      | 44.2     | 100.9 | 2.0             | 13.4     | 124.3 | 4.6      | 45.8     | 146.5 |
| 1988–1992 | 2.8             | 22.7     | 118.6 | 2.0      | 32.1     | 91.2  | 0.4             | 6.8      | 78.1  | 3.2      | 31.0     | 118.7 |
| 1993–1997 | 2.2             | 19.4     | 99.3  | 2.6      | 31.3     | 98.2  | 0.6             | 7.3      | 87.3  | 2.4      | 21.2     | 108.6 |
| 1998–2002 | 3.2             | 26.6     | 98.6  | 3.6      | 40.7     | 89.4  | 1.4             | 11.8     | 101.5 | 2.0      | 18.9     | 89.8  |
| 2003–2007 | 3.8             | 32.5     | 104.7 | 4.8      | 45.9     | 106.9 | 1.8             | 14.5     | 111.4 | 2.2      | 18.5     | 99.1  |
| 2008–2012 | 3.6             | 35.6     | 109.2 | 6.0      | 48.2     | 122.1 | 1.0             | 13.6     | 94.6  | 3.2      | 21.3     | 119.4 |
| -----     |                 |          |       |          |          |       |                 |          |       |          |          |       |
|           | 35–44           |          |       | >74 y/o  |          |       | 35–44           |          |       | >74 y/o  |          |       |
| 1983–1987 | 4.6             | 30.0     | 94.4  | 3.0      | 88.9     | 113.5 | 3.0             | 15.1     | 128.0 | 2.8      | 58.7     | 101.7 |
| 1988–1992 | 3.0             | 21.7     | 91.7  | 3.6      | 81.1     | 125.8 | 0.8             | 8.0      | 82.9  | 4.8      | 67.9     | 141.9 |
| 1993–1997 | 2.8             | 23.8     | 97.3  | 3.4      | 66.7     | 128.1 | 0.8             | 7.8      | 91.7  | 5.4      | 59.2     | 172.0 |
| 1998–2002 | 3.4             | 33.2     | 94.4  | 3.2      | 55.9     | 106.0 | 1.2             | 10.7     | 103.8 | 3.2      | 31.3     | 100.9 |
| 2003–2007 | 6.0             | 50.4     | 125.7 | 5.2      | 63.6     | 141.1 | 1.4             | 12.8     | 101.6 | 3.2      | 24.9     | 111.1 |
| 2008–2012 | 6.6             | 46.5     | 125.0 | 3.2      | 39.4     | 94.9  | 1.4             | 13.1     | 97.0  | 3.2      | 21.4     | 111.1 |

Secondary Medical Zone ID: 084

|           | Male            |          |       |          |          |       | Female          |          |       |          |          |       |
|-----------|-----------------|----------|-------|----------|----------|-------|-----------------|----------|-------|----------|----------|-------|
|           | Suicide         |          |       | Suicide  |          |       | Suicide         |          |       | Suicide  |          |       |
|           | Num             | Rate     | × 100 | Num      | Rate     | × 100 | Num             | Rate     | × 100 | Num      | Rate     | × 100 |
|           | per year        | /100,000 |       | per year | /100,000 |       | per year        | /100,000 |       | per year | /100,000 |       |
|           | Total (>10 y/o) |          |       | 45–54    |          |       | Total (>10 y/o) |          |       | 45–54    |          |       |
| 1983–1987 | 50.4            | 34.4     | 106.6 | 8.2      | 39.8     | 78.8  | 29.2            | 17.6     | 121.5 | 5.0      | 21.5     | 124.6 |
| 1988–1992 | 42.8            | 25.8     | 107.6 | 7.2      | 28.2     | 82.0  | 29.4            | 15.2     | 128.0 | 6.2      | 20.6     | 140.6 |
| 1993–1997 | 45.4            | 25.5     | 102.8 | 10.4     | 33.2     | 90.7  | 22.2            | 11.1     | 106.6 | 3.0      | 11.1     | 86.1  |
| 1998–2002 | 60.0            | 32.4     | 90.1  | 14.0     | 46.0     | 82.2  | 28.0            | 12.7     | 109.2 | 3.8      | 13.5     | 89.7  |
| 2003–2007 | 68.8            | 36.1     | 99.3  | 12.8     | 49.4     | 88.4  | 26.2            | 12.6     | 104.6 | 3.2      | 13.1     | 95.6  |
| 2008–2012 | 65.6            | 34.8     | 101.2 | 11.4     | 48.7     | 100.2 | 25.0            | 12.7     | 100.8 | 2.8      | 13.8     | 92.6  |
|           | 15–24           |          |       | 55–64    |          |       | 15–24           |          |       | 55–64    |          |       |
| 1983–1987 | 4.2             | 16.0     | 114.6 | 7.8      | 47.6     | 111.9 | 1.4             | 6.4      | 93.9  | 5.4      | 25.9     | 131.3 |
| 1988–1992 | 4.2             | 12.5     | 126.1 | 8.6      | 43.2     | 121.7 | 0.6             | 3.6      | 68.3  | 4.2      | 20.2     | 113.0 |
| 1993–1997 | 2.8             | 10.3     | 91.0  | 8.8      | 41.2     | 102.4 | 1.0             | 4.4      | 84.9  | 3.8      | 17.5     | 109.9 |
| 1998–2002 | 4.2             | 16.5     | 104.5 | 13.4     | 54.8     | 86.3  | 0.8             | 5.2      | 74.7  | 5.2      | 20.4     | 108.3 |
| 2003–2007 | 5.0             | 21.3     | 121.9 | 17.6     | 57.9     | 100.4 | 1.4             | 8.1      | 89.7  | 3.6      | 14.0     | 83.7  |
| 2008–2012 | 5.8             | 27.1     | 127.7 | 13.4     | 45.0     | 92.6  | 1.2             | 8.4      | 86.5  | 5.4      | 16.6     | 111.3 |
|           | 25–34           |          |       | 65–74    |          |       | 25–34           |          |       | 65–74    |          |       |
| 1983–1987 | 6.2             | 24.2     | 94.5  | 5.0      | 47.2     | 107.9 | 2.2             | 9.6      | 89.4  | 4.8      | 34.5     | 110.3 |
| 1988–1992 | 4.4             | 18.3     | 95.6  | 4.0      | 35.6     | 101.0 | 3.4             | 12.3     | 141.6 | 5.4      | 32.6     | 124.8 |
| 1993–1997 | 6.0             | 21.7     | 111.2 | 3.8      | 29.0     | 90.9  | 2.2             | 8.9      | 106.8 | 4.2      | 23.0     | 118.2 |
| 1998–2002 | 8.6             | 28.1     | 104.2 | 7.6      | 46.6     | 102.4 | 1.8             | 8.9      | 76.8  | 3.6      | 20.2     | 96.2  |
| 2003–2007 | 10.2            | 33.4     | 107.7 | 9.6      | 49.9     | 116.2 | 3.8             | 14.0     | 107.5 | 5.2      | 23.6     | 126.8 |
| 2008–2012 | 9.6             | 36.1     | 110.9 | 7.6      | 35.7     | 90.4  | 3.0             | 14.0     | 97.4  | 4.0      | 17.7     | 99.4  |
|           | 35–44           |          |       | >74 y/o  |          |       | 35–44           |          |       | >74 y/o  |          |       |
| 1983–1987 | 11.4            | 33.7     | 105.7 | 7.6      | 131.7    | 168.1 | 3.6             | 11.7     | 99.3  | 6.6      | 86.7     | 150.4 |
| 1988–1992 | 9.0             | 26.8     | 113.1 | 5.0      | 71.7     | 111.1 | 3.4             | 10.5     | 108.6 | 6.0      | 58.1     | 121.3 |
| 1993–1997 | 7.0             | 25.7     | 105.0 | 6.4      | 73.4     | 140.9 | 2.2             | 8.6      | 100.6 | 5.8      | 42.0     | 122.1 |
| 1998–2002 | 4.8             | 22.9     | 65.1  | 7.0      | 68.5     | 130.0 | 2.6             | 11.0     | 106.4 | 10.2     | 55.7     | 179.3 |
| 2003–2007 | 9.4             | 35.9     | 89.6  | 3.8      | 35.3     | 78.4  | 2.8             | 12.2     | 96.3  | 6.2      | 29.0     | 129.4 |
| 2008–2012 | 9.0             | 31.4     | 84.4  | 8.8      | 56.8     | 136.9 | 3.2             | 12.6     | 92.7  | 5.2      | 21.6     | 112.5 |

Secondary Medical Zone ID: 085

|           | Male            |          |       |          |          |       | Female          |          |       |          |          |       |
|-----------|-----------------|----------|-------|----------|----------|-------|-----------------|----------|-------|----------|----------|-------|
|           | Suicide         |          |       | Suicide  |          |       | Suicide         |          |       | Suicide  |          |       |
|           | Num             | Rate     | × 100 | Num      | Rate     | × 100 | Num             | Rate     | × 100 | Num      | Rate     | × 100 |
|           | per year        | /100,000 |       | per year | /100,000 |       | per year        | /100,000 |       | per year | /100,000 |       |
|           | Total (>10 y/o) |          |       | 45–54    |          |       | Total (>10 y/o) |          |       | 45–54    |          |       |
| 1983–1987 | 71.4            | 30.4     | 90.7  | 18.8     | 42.9     | 84.9  | 38.6            | 16.4     | 109.3 | 7.6      | 18.1     | 104.8 |
| 1988–1992 | 56.8            | 21.6     | 83.7  | 12.6     | 25.4     | 74.0  | 33.4            | 12.3     | 97.1  | 8.2      | 16.2     | 110.8 |
| 1993–1997 | 75.4            | 24.1     | 96.4  | 25.2     | 43.3     | 118.3 | 37.2            | 12.0     | 111.2 | 7.8      | 14.4     | 111.1 |
| 1998–2002 | 111.4           | 33.3     | 91.9  | 29.2     | 55.2     | 98.6  | 36.6            | 11.5     | 88.7  | 6.6      | 14.1     | 93.7  |
| 2003–2007 | 116.4           | 33.2     | 90.2  | 24.6     | 52.5     | 93.9  | 42.4            | 12.2     | 98.2  | 3.6      | 10.3     | 74.9  |
| 2008–2012 | 124.0           | 33.4     | 99.2  | 22.6     | 46.4     | 95.4  | 48.4            | 13.5     | 105.1 | 6.4      | 15.2     | 102.2 |
|           | 15–24           |          |       | 55–64    |          |       | 15–24           |          |       | 55–64    |          |       |
| 1983–1987 | 4.8             | 10.2     | 73.4  | 11.0     | 46.5     | 109.4 | 2.8             | 6.1      | 89.9  | 5.4      | 21.8     | 110.7 |
| 1988–1992 | 6.0             | 10.3     | 104.2 | 11.6     | 34.8     | 97.9  | 2.8             | 5.2      | 99.3  | 5.2      | 16.9     | 94.4  |
| 1993–1997 | 4.0             | 8.7      | 77.2  | 16.6     | 39.7     | 98.6  | 1.6             | 3.9      | 74.6  | 5.6      | 14.5     | 91.0  |
| 1998–2002 | 7.2             | 16.6     | 104.9 | 30.0     | 62.4     | 98.2  | 2.8             | 7.0      | 100.3 | 7.8      | 17.3     | 91.9  |
| 2003–2007 | 5.6             | 15.5     | 88.7  | 30.6     | 57.9     | 100.4 | 2.4             | 7.5      | 83.3  | 8.8      | 17.3     | 103.3 |
| 2008–2012 | 7.6             | 20.8     | 98.1  | 27.4     | 53.9     | 110.8 | 4.6             | 12.3     | 127.1 | 5.6      | 12.9     | 86.4  |
|           | 25–34           |          |       | 65–74    |          |       | 25–34           |          |       | 65–74    |          |       |
| 1983–1987 | 11.0            | 23.7     | 92.6  | 4.2      | 39.5     | 90.3  | 4.6             | 11.0     | 101.8 | 3.8      | 26.8     | 85.7  |
| 1988–1992 | 5.0             | 10.6     | 55.4  | 4.8      | 34.9     | 98.9  | 4.2             | 9.0      | 103.5 | 4.0      | 23.4     | 89.6  |
| 1993–1997 | 9.8             | 16.5     | 84.2  | 6.0      | 31.3     | 98.1  | 4.8             | 8.8      | 106.0 | 6.2      | 26.4     | 135.3 |
| 1998–2002 | 15.0            | 23.4     | 86.8  | 10.2     | 38.8     | 85.2  | 5.6             | 10.2     | 87.6  | 4.2      | 16.3     | 77.5  |
| 2003–2007 | 14.6            | 24.3     | 78.5  | 13.0     | 37.7     | 88.0  | 7.2             | 13.0     | 100.2 | 6.4      | 17.8     | 95.4  |
| 2008–2012 | 13.6            | 26.6     | 81.7  | 22.0     | 51.6     | 130.7 | 9.0             | 17.6     | 123.0 | 9.2      | 20.4     | 114.4 |
|           | 35–44           |          |       | >74 y/o  |          |       | 35–44           |          |       | >74 y/o  |          |       |
| 1983–1987 | 17.4            | 29.9     | 94.0  | 4.2      | 85.1     | 108.7 | 9.0             | 15.4     | 130.4 | 5.4      | 70.6     | 122.3 |
| 1988–1992 | 11.8            | 21.5     | 90.5  | 5.0      | 72.6     | 112.5 | 4.2             | 8.8      | 91.4  | 4.4      | 40.6     | 84.8  |
| 1993–1997 | 10.0            | 20.9     | 85.3  | 3.8      | 47.9     | 91.9  | 7.0             | 14.2     | 166.5 | 4.2      | 29.6     | 86.1  |
| 1998–2002 | 13.2            | 26.8     | 76.2  | 6.4      | 57.0     | 108.1 | 3.4             | 8.5      | 82.7  | 6.2      | 33.0     | 106.3 |
| 2003–2007 | 21.4            | 35.8     | 89.3  | 6.4      | 41.6     | 92.3  | 6.8             | 13.1     | 103.4 | 6.6      | 26.3     | 117.2 |
| 2008–2012 | 24.0            | 34.9     | 93.9  | 6.6      | 31.9     | 77.0  | 6.4             | 11.4     | 83.9  | 7.2      | 21.4     | 111.4 |

Secondary Medical Zone ID: 086

|           | Male            |          |       |          |          |       | Female          |          |       |          |          |       |
|-----------|-----------------|----------|-------|----------|----------|-------|-----------------|----------|-------|----------|----------|-------|
|           | Suicide         |          |       | Suicide  |          |       | Suicide         |          |       | Suicide  |          |       |
|           | Num             | Rate     | × 100 | Num      | Rate     | × 100 | Num             | Rate     | × 100 | Num      | Rate     | × 100 |
|           | per year        | /100,000 |       | per year | /100,000 |       | per year        | /100,000 |       | per year | /100,000 |       |
|           | Total (>10 y/o) |          |       | 45–54    |          |       | Total (>10 y/o) |          |       | 45–54    |          |       |
| 1983–1987 | 52.8            | 26.9     | 77.7  | 16.0     | 40.1     | 79.3  | 28.0            | 14.7     | 94.8  | 6.8      | 18.1     | 105.2 |
| 1988–1992 | 46.8            | 20.6     | 79.0  | 13.0     | 28.1     | 81.7  | 27.0            | 11.9     | 90.8  | 6.4      | 14.1     | 96.2  |
| 1993–1997 | 63.2            | 22.7     | 90.4  | 19.0     | 37.2     | 101.7 | 25.4            | 9.6      | 87.1  | 4.6      | 10.1     | 78.5  |
| 1998–2002 | 89.2            | 30.2     | 81.3  | 20.4     | 45.5     | 81.3  | 39.2            | 12.7     | 100.8 | 8.6      | 17.7     | 117.3 |
| 2003–2007 | 91.4            | 29.8     | 78.8  | 17.8     | 44.9     | 80.2  | 41.6            | 12.9     | 102.6 | 5.0      | 13.4     | 97.7  |
| 2008–2012 | 103.8           | 31.8     | 93.2  | 17.4     | 42.2     | 86.8  | 45.6            | 14.0     | 105.7 | 5.4      | 14.5     | 97.2  |
|           | 15–24           |          |       | 55–64    |          |       | 15–24           |          |       | 55–64    |          |       |
| 1983–1987 | 6.0             | 12.8     | 92.0  | 4.4      | 28.8     | 67.9  | 3.4             | 7.7      | 112.0 | 1.6      | 12.9     | 65.3  |
| 1988–1992 | 4.2             | 7.9      | 79.9  | 8.8      | 31.3     | 88.1  | 2.2             | 4.6      | 86.7  | 4.0      | 16.2     | 90.7  |
| 1993–1997 | 6.6             | 12.0     | 105.8 | 14.6     | 38.2     | 94.9  | 4.2             | 7.5      | 144.6 | 3.8      | 12.0     | 75.6  |
| 1998–2002 | 7.0             | 15.7     | 99.4  | 24.6     | 55.6     | 87.5  | 3.2             | 7.6      | 107.8 | 8.2      | 18.5     | 98.5  |
| 2003–2007 | 6.4             | 17.2     | 98.7  | 21.4     | 46.1     | 79.9  | 3.6             | 10.0     | 111.4 | 7.2      | 15.3     | 91.3  |
| 2008–2012 | 6.4             | 19.2     | 90.5  | 19.8     | 45.9     | 94.5  | 4.0             | 11.4     | 117.4 | 5.6      | 13.2     | 88.7  |
|           | 25–34           |          |       | 65–74    |          |       | 25–34           |          |       | 65–74    |          |       |
| 1983–1987 | 8.4             | 22.2     | 86.7  | 1.6      | 27.6     | 63.0  | 3.8             | 10.5     | 97.2  | 3.6      | 31.6     | 101.0 |
| 1988–1992 | 5.8             | 13.9     | 72.5  | 4.2      | 38.2     | 108.4 | 3.0             | 8.0      | 91.9  | 3.2      | 23.8     | 91.3  |
| 1993–1997 | 7.6             | 14.8     | 75.7  | 4.6      | 29.8     | 93.3  | 4.0             | 8.3      | 100.3 | 2.8      | 17.0     | 87.2  |
| 1998–2002 | 10.0            | 17.8     | 66.0  | 9.0      | 38.6     | 84.9  | 7.4             | 12.8     | 110.8 | 4.6      | 19.7     | 93.6  |
| 2003–2007 | 12.6            | 23.0     | 74.0  | 11.0     | 34.8     | 81.2  | 9.0             | 16.1     | 123.7 | 7.2      | 20.9     | 112.3 |
| 2008–2012 | 15.2            | 32.1     | 98.5  | 16.2     | 41.1     | 104.2 | 9.2             | 18.9     | 132.1 | 7.2      | 17.3     | 96.9  |
|           | 35–44           |          |       | >74 y/o  |          |       | 35–44           |          |       | >74 y/o  |          |       |
| 1983–1987 | 13.2            | 25.5     | 80.2  | 3.2      | 85.9     | 109.7 | 5.0             | 10.1     | 85.1  | 3.4      | 60.6     | 105.0 |
| 1988–1992 | 7.6             | 16.9     | 71.4  | 3.0      | 57.9     | 89.7  | 3.8             | 8.6      | 89.1  | 4.4      | 48.4     | 101.1 |
| 1993–1997 | 8.2             | 20.2     | 82.6  | 2.2      | 38.0     | 73.0  | 2.2             | 6.6      | 77.9  | 3.6      | 30.3     | 88.1  |
| 1998–2002 | 11.6            | 26.8     | 76.0  | 5.8      | 61.3     | 116.4 | 2.8             | 8.1      | 78.6  | 4.4      | 28.1     | 90.6  |
| 2003–2007 | 17.4            | 32.7     | 81.7  | 4.6      | 36.7     | 81.5  | 5.6             | 12.0     | 95.2  | 3.8      | 18.7     | 83.3  |
| 2008–2012 | 19.4            | 32.3     | 86.8  | 9.4      | 45.1     | 108.6 | 9.6             | 16.1     | 118.7 | 4.4      | 16.1     | 83.5  |

Secondary Medical Zone ID: 087

|           | Male            |                  |       |                 |                  |       | Female          |                  |       |                 |                  |       |
|-----------|-----------------|------------------|-------|-----------------|------------------|-------|-----------------|------------------|-------|-----------------|------------------|-------|
|           | Suicide         |                  |       | Suicide         |                  |       | Suicide         |                  |       | Suicide         |                  |       |
|           | Num<br>per year | Rate<br>/100,000 | × 100 | Num<br>per year | Rate<br>/100,000 | × 100 | Num<br>per year | Rate<br>/100,000 | × 100 | Num<br>per year | Rate<br>/100,000 | × 100 |
|           |                 |                  |       |                 |                  |       |                 |                  |       |                 |                  |       |
|           | Total (>10 y/o) |                  |       | 45–54           |                  |       | Total (>10 y/o) |                  |       | 45–54           |                  |       |
| 1983–1987 | 88.0            | 27.6             | 81.2  | 25.4            | 39.6             | 78.3  | 43.6            | 14.4             | 92.0  | 10.2            | 18.4             | 106.6 |
| 1988–1992 | 77.4            | 21.1             | 79.6  | 18.4            | 22.7             | 66.0  | 49.6            | 12.7             | 99.8  | 10.4            | 13.7             | 93.8  |
| 1993–1997 | 105.4           | 23.0             | 90.0  | 28.2            | 30.7             | 83.9  | 49.4            | 10.7             | 99.0  | 9.4             | 10.7             | 82.8  |
| 1998–2002 | 166.8           | 32.9             | 90.2  | 43.4            | 51.6             | 92.1  | 64.0            | 12.7             | 99.0  | 11.4            | 13.6             | 90.6  |
| 2003–2007 | 170.6           | 32.8             | 88.8  | 31.2            | 45.8             | 81.9  | 69.0            | 13.0             | 103.1 | 7.0             | 11.0             | 80.6  |
| 2008–2012 | 172.6           | 32.6             | 94.0  | 31.2            | 47.4             | 97.5  | 72.6            | 13.6             | 103.5 | 10.6            | 16.9             | 113.3 |
|           | 15–24           |                  |       | 55–64           |                  |       | 15–24           |                  |       | 55–64           |                  |       |
| 1983–1987 | 9.6             | 13.6             | 97.7  | 10.6            | 40.3             | 94.9  | 5.2             | 7.5              | 109.9 | 3.8             | 15.5             | 78.4  |
| 1988–1992 | 7.0             | 8.0              | 81.2  | 11.4            | 26.7             | 75.3  | 4.4             | 5.1              | 96.6  | 6.8             | 17.4             | 97.7  |
| 1993–1997 | 8.6             | 10.0             | 88.1  | 25.0            | 38.9             | 96.6  | 7.2             | 7.8              | 149.0 | 7.4             | 13.6             | 85.6  |
| 1998–2002 | 11.0            | 15.3             | 96.8  | 43.6            | 54.4             | 85.7  | 6.4             | 8.7              | 123.8 | 10.6            | 14.8             | 78.7  |
| 2003–2007 | 12.8            | 20.5             | 117.4 | 42.0            | 48.0             | 83.2  | 6.2             | 10.4             | 115.1 | 13.4            | 15.3             | 91.6  |
| 2008–2012 | 12.6            | 22.4             | 105.6 | 36.8            | 45.9             | 94.4  | 6.0             | 10.9             | 112.0 | 12.2            | 14.5             | 97.3  |
|           | 25–34           |                  |       | 65–74           |                  |       | 25–34           |                  |       | 65–74           |                  |       |
| 1983–1987 | 10.6            | 19.2             | 75.3  | 5.2             | 41.1             | 93.8  | 4.4             | 8.1              | 75.2  | 4.8             | 26.9             | 86.2  |
| 1988–1992 | 10.6            | 16.7             | 87.2  | 6.4             | 37.9             | 107.6 | 6.8             | 10.5             | 120.9 | 4.8             | 21.8             | 83.7  |
| 1993–1997 | 14.6            | 18.3             | 93.5  | 6.4             | 27.1             | 84.9  | 4.8             | 6.9              | 82.4  | 5.6             | 19.8             | 101.6 |
| 1998–2002 | 23.4            | 25.6             | 94.9  | 15.6            | 41.2             | 90.6  | 10.8            | 12.5             | 108.1 | 6.8             | 18.7             | 89.0  |
| 2003–2007 | 23.0            | 27.1             | 87.5  | 24.0            | 42.8             | 99.8  | 11.6            | 14.3             | 109.9 | 10.2            | 19.0             | 101.9 |
| 2008–2012 | 17.6            | 25.8             | 79.2  | 25.2            | 35.6             | 90.1  | 9.6             | 14.4             | 100.2 | 12.4            | 17.2             | 96.8  |
|           | 35–44           |                  |       | >74 y/o         |                  |       | 35–44           |                  |       | >74 y/o         |                  |       |
| 1983–1987 | 23.2            | 25.4             | 79.8  | 3.4             | 63.6             | 81.2  | 8.8             | 9.9              | 83.7  | 6.4             | 68.1             | 118.0 |
| 1988–1992 | 16.0            | 19.2             | 80.8  | 7.2             | 81.7             | 126.6 | 7.8             | 9.2              | 95.2  | 8.6             | 56.4             | 117.9 |
| 1993–1997 | 15.6            | 22.2             | 90.5  | 6.8             | 62.8             | 120.5 | 6.8             | 9.6              | 112.6 | 8.2             | 40.1             | 116.6 |
| 1998–2002 | 21.6            | 31.7             | 90.0  | 8.0             | 56.7             | 107.5 | 8.8             | 13.1             | 126.8 | 9.2             | 34.8             | 112.2 |
| 2003–2007 | 27.4            | 34.5             | 86.2  | 9.6             | 46.1             | 102.3 | 10.8            | 14.5             | 114.5 | 9.4             | 27.2             | 121.4 |
| 2008–2012 | 33.8            | 35.2             | 94.6  | 15.4            | 47.7             | 115.0 | 12.6            | 14.4             | 106.5 | 9.0             | 19.9             | 103.5 |



Secondary Medical Zone ID: 088

|           | Male            |                  |       |                 |                  |       | Female          |                  |       |                 |                  |       |
|-----------|-----------------|------------------|-------|-----------------|------------------|-------|-----------------|------------------|-------|-----------------|------------------|-------|
|           | Suicide         |                  |       | Suicide         |                  |       | Suicide         |                  |       | Suicide         |                  |       |
|           | Num<br>per year | Rate<br>/100,000 | × 100 | Num<br>per year | Rate<br>/100,000 | × 100 | Num<br>per year | Rate<br>/100,000 | × 100 | Num<br>per year | Rate<br>/100,000 | × 100 |
|           |                 |                  |       |                 |                  |       |                 |                  |       |                 |                  |       |
|           | Total (>10 y/o) |                  |       | 45–54           |                  |       | Total (>10 y/o) |                  |       | 45–54           |                  |       |
| 1983–1987 | 92.8            | 26.7             | 78.4  | 23.8            | 37.5             | 74.1  | 52.2            | 14.6             | 94.3  | 10.4            | 17.0             | 98.7  |
| 1988–1992 | 79.8            | 19.5             | 76.9  | 19.8            | 26.3             | 76.5  | 53.6            | 12.3             | 96.7  | 11.4            | 15.0             | 102.6 |
| 1993–1997 | 102.4           | 21.6             | 83.9  | 22.4            | 26.9             | 73.6  | 55.4            | 10.9             | 101.5 | 10.4            | 12.2             | 94.5  |
| 1998–2002 | 153.8           | 29.2             | 80.1  | 37.0            | 44.9             | 80.2  | 68.2            | 12.3             | 97.4  | 12.6            | 15.2             | 100.9 |
| 2003–2007 | 155.0           | 28.1             | 76.0  | 27.8            | 37.1             | 66.3  | 72.8            | 12.8             | 100.0 | 9.8             | 13.5             | 98.5  |
| 2008–2012 | 180.2           | 31.8             | 91.5  | 35.0            | 44.1             | 90.7  | 88.0            | 14.6             | 113.6 | 9.2             | 12.9             | 86.2  |
|           | 15–24           |                  |       | 55–64           |                  |       | 15–24           |                  |       | 55–64           |                  |       |
| 1983–1987 | 10.2            | 13.8             | 99.0  | 13.0            | 35.7             | 84.0  | 2.4             | 4.3              | 63.0  | 5.2             | 14.7             | 74.3  |
| 1988–1992 | 8.4             | 9.4              | 95.4  | 12.4            | 25.6             | 72.2  | 3.8             | 4.8              | 90.7  | 8.4             | 17.2             | 96.2  |
| 1993–1997 | 9.8             | 11.2             | 98.8  | 23.6            | 37.8             | 94.0  | 5.8             | 6.8              | 130.4 | 8.6             | 14.4             | 90.8  |
| 1998–2002 | 10.8            | 14.6             | 92.5  | 36.4            | 50.3             | 79.1  | 6.4             | 8.8              | 125.2 | 12.0            | 16.8             | 89.0  |
| 2003–2007 | 11.8            | 17.5             | 100.5 | 39.0            | 48.1             | 83.3  | 5.8             | 9.3              | 103.9 | 15.0            | 17.7             | 105.6 |
| 2008–2012 | 13.4            | 20.9             | 98.5  | 37.4            | 47.1             | 97.0  | 6.4             | 10.5             | 108.5 | 11.8            | 14.7             | 98.5  |
|           | 25–34           |                  |       | 65–74           |                  |       | 25–34           |                  |       | 65–74           |                  |       |
| 1983–1987 | 14.2            | 22.3             | 87.1  | 6.8             | 36.1             | 82.5  | 7.8             | 12.3             | 114.6 | 10.8            | 40.2             | 128.7 |
| 1988–1992 | 12.0            | 16.3             | 85.4  | 6.8             | 29.6             | 84.1  | 4.8             | 7.4              | 85.2  | 7.6             | 25.0             | 95.9  |
| 1993–1997 | 13.6            | 15.6             | 79.7  | 7.6             | 24.4             | 76.5  | 7.6             | 9.1              | 109.4 | 7.8             | 20.6             | 105.5 |
| 1998–2002 | 24.8            | 25.2             | 93.3  | 13.8            | 33.3             | 73.1  | 8.8             | 9.9              | 85.8  | 11.0            | 23.1             | 110.0 |
| 2003–2007 | 21.8            | 24.0             | 77.5  | 20.4            | 37.8             | 88.1  | 10.8            | 12.4             | 95.6  | 10.6            | 18.4             | 99.0  |
| 2008–2012 | 24.2            | 30.8             | 94.5  | 23.0            | 36.0             | 91.2  | 15.6            | 19.5             | 136.2 | 14.6            | 20.4             | 114.9 |
|           | 35–44           |                  |       | >74 y/o         |                  |       | 35–44           |                  |       | >74 y/o         |                  |       |
| 1983–1987 | 17.0            | 21.1             | 66.2  | 7.6             | 78.5             | 100.2 | 8.6             | 10.4             | 87.8  | 6.8             | 50.6             | 87.7  |
| 1988–1992 | 14.0            | 17.6             | 74.2  | 6.2             | 49.7             | 77.0  | 8.4             | 10.3             | 106.2 | 9.2             | 45.8             | 95.7  |
| 1993–1997 | 13.4            | 18.0             | 73.3  | 11.6            | 69.9             | 134.2 | 5.8             | 8.2              | 96.3  | 9.4             | 35.2             | 102.4 |
| 1998–2002 | 21.0            | 26.3             | 74.8  | 9.6             | 46.8             | 88.7  | 6.8             | 9.3              | 90.2  | 10.6            | 31.0             | 99.8  |
| 2003–2007 | 24.4            | 27.1             | 67.7  | 9.8             | 35.0             | 77.8  | 12.2            | 13.9             | 110.1 | 8.4             | 18.9             | 84.4  |
| 2008–2012 | 33.4            | 33.1             | 89.0  | 13.4            | 35.4             | 85.4  | 16.4            | 16.3             | 120.4 | 13.0            | 22.1             | 114.8 |

Secondary Medical Zone ID: 089

|           | Male            |          |       |          |          |       | Female          |          |       |          |          |       |
|-----------|-----------------|----------|-------|----------|----------|-------|-----------------|----------|-------|----------|----------|-------|
|           | Suicide         |          |       | Suicide  |          |       | Suicide         |          |       | Suicide  |          |       |
|           | Num             | Rate     | × 100 | Num      | Rate     | × 100 | Num             | Rate     | × 100 | Num      | Rate     | × 100 |
|           | per year        | /100,000 |       | per year | /100,000 |       | per year        | /100,000 |       | per year | /100,000 |       |
|           | Total (>10 y/o) |          |       | 45–54    |          |       | Total (>10 y/o) |          |       | 45–54    |          |       |
| 1983–1987 | 43.8            | 29.4     | 85.4  | 11.6     | 39.3     | 77.7  | 25.0            | 16.1     | 106.4 | 7.8      | 25.1     | 145.9 |
| 1988–1992 | 39.0            | 22.2     | 84.6  | 11.2     | 29.7     | 86.6  | 23.4            | 12.4     | 97.1  | 6.4      | 16.7     | 114.0 |
| 1993–1997 | 48.4            | 22.6     | 87.5  | 11.8     | 29.2     | 79.7  | 26.4            | 11.2     | 106.8 | 4.8      | 11.7     | 90.6  |
| 1998–2002 | 73.0            | 31.1     | 83.9  | 19.8     | 50.2     | 89.7  | 35.4            | 13.8     | 109.7 | 6.6      | 15.7     | 104.2 |
| 2003–2007 | 70.2            | 29.7     | 77.5  | 12.2     | 37.7     | 67.5  | 32.4            | 12.2     | 99.1  | 3.0      | 10.5     | 76.3  |
| 2008–2012 | 88.4            | 35.3     | 101.1 | 18.2     | 55.2     | 113.5 | 33.8            | 12.5     | 99.4  | 5.6      | 16.9     | 113.0 |
| -----     |                 |          |       |          |          |       |                 |          |       |          |          |       |
|           | 15–24           |          |       | 55–64    |          |       | 15–24           |          |       | 55–64    |          |       |
| 1983–1987 | 4.0             | 13.0     | 93.3  | 7.0      | 46.0     | 108.2 | 1.2             | 5.1      | 75.1  | 2.4      | 17.7     | 89.6  |
| 1988–1992 | 3.6             | 9.2      | 93.4  | 5.8      | 27.8     | 78.3  | 1.8             | 4.9      | 92.0  | 4.8      | 21.2     | 118.9 |
| 1993–1997 | 3.8             | 10.1     | 89.0  | 11.4     | 37.7     | 93.7  | 2.6             | 6.2      | 118.4 | 4.8      | 16.9     | 106.2 |
| 1998–2002 | 6.0             | 17.1     | 108.2 | 15.0     | 43.0     | 67.6  | 1.4             | 5.4      | 76.7  | 6.6      | 18.4     | 97.9  |
| 2003–2007 | 6.2             | 19.9     | 114.0 | 17.6     | 44.9     | 77.7  | 2.8             | 9.6      | 107.0 | 6.0      | 15.0     | 89.6  |
| 2008–2012 | 7.0             | 24.6     | 115.9 | 17.4     | 45.5     | 93.8  | 1.6             | 7.5      | 77.1  | 5.8      | 14.4     | 96.5  |
| -----     |                 |          |       |          |          |       |                 |          |       |          |          |       |
|           | 25–34           |          |       | 65–74    |          |       | 25–34           |          |       | 65–74    |          |       |
| 1983–1987 | 5.4             | 21.5     | 83.9  | 3.4      | 44.7     | 102.0 | 2.4             | 9.5      | 88.4  | 4.2      | 38.4     | 123.0 |
| 1988–1992 | 4.2             | 15.4     | 80.7  | 4.8      | 44.8     | 127.2 | 1.8             | 7.2      | 83.5  | 2.0      | 19.2     | 73.7  |
| 1993–1997 | 6.4             | 18.4     | 94.1  | 4.6      | 32.8     | 102.9 | 3.6             | 9.7      | 117.0 | 2.8      | 18.6     | 95.4  |
| 1998–2002 | 11.6            | 28.5     | 105.4 | 9.0      | 45.0     | 98.9  | 7.6             | 16.9     | 146.1 | 3.6      | 18.9     | 90.1  |
| 2003–2007 | 10.8            | 28.5     | 92.0  | 9.6      | 36.5     | 85.0  | 5.2             | 13.7     | 105.5 | 5.4      | 19.7     | 105.7 |
| 2008–2012 | 10.2            | 31.7     | 97.3  | 10.4     | 32.4     | 82.0  | 3.4             | 12.2     | 84.9  | 6.2      | 17.8     | 100.1 |
| -----     |                 |          |       |          |          |       |                 |          |       |          |          |       |
|           | 35–44           |          |       | >74 y/o  |          |       | 35–44           |          |       | >74 y/o  |          |       |
| 1983–1987 | 10.2            | 26.0     | 81.7  | 2.2      | 73.5     | 93.8  | 3.2             | 9.0      | 76.2  | 3.4      | 66.8     | 115.8 |
| 1988–1992 | 5.4             | 15.5     | 65.5  | 4.0      | 77.0     | 119.4 | 3.0             | 8.3      | 85.8  | 3.6      | 46.4     | 97.1  |
| 1993–1997 | 6.8             | 20.4     | 83.4  | 3.6      | 56.2     | 108.0 | 1.8             | 6.4      | 74.8  | 6.0      | 51.7     | 150.3 |
| 1998–2002 | 7.8             | 25.5     | 72.5  | 3.8      | 47.5     | 90.1  | 5.0             | 13.8     | 133.7 | 4.4      | 30.8     | 99.2  |
| 2003–2007 | 9.4             | 27.4     | 68.3  | 4.2      | 37.3     | 82.9  | 3.4             | 10.8     | 85.4  | 6.4      | 32.2     | 143.4 |
| 2008–2012 | 15.6            | 36.9     | 99.1  | 9.2      | 50.5     | 121.8 | 4.4             | 11.9     | 87.7  | 6.8      | 26.2     | 136.2 |

Secondary Medical Zone ID: 090

|           | Male            |          |       |          |          |       | Female          |          |       |          |          |       |
|-----------|-----------------|----------|-------|----------|----------|-------|-----------------|----------|-------|----------|----------|-------|
|           | Suicide         |          |       | Suicide  |          |       | Suicide         |          |       | Suicide  |          |       |
|           | Num             | Rate     | × 100 | Num      | Rate     | × 100 | Num             | Rate     | × 100 | Num      | Rate     | × 100 |
|           | per year        | /100,000 |       | per year | /100,000 |       | per year        | /100,000 |       | per year | /100,000 |       |
|           | Total (>10 y/o) |          |       | 45–54    |          |       | Total (>10 y/o) |          |       | 45–54    |          |       |
| 1983–1987 | 72.4            | 30.0     | 87.8  | 16.2     | 38.5     | 76.2  | 40.2            | 15.8     | 103.8 | 7.0      | 18.1     | 105.0 |
| 1988–1992 | 65.0            | 22.2     | 87.4  | 14.8     | 26.9     | 78.2  | 40.2            | 12.7     | 100.6 | 6.8      | 13.5     | 92.5  |
| 1993–1997 | 84.6            | 24.0     | 96.0  | 23.6     | 35.5     | 97.0  | 43.2            | 11.3     | 108.7 | 8.2      | 12.7     | 98.6  |
| 1998–2002 | 124.0           | 32.9     | 90.7  | 31.8     | 50.1     | 89.6  | 50.0            | 12.5     | 100.0 | 8.0      | 13.1     | 86.8  |
| 2003–2007 | 125.0           | 33.2     | 88.6  | 22.8     | 43.6     | 78.0  | 53.8            | 12.9     | 106.2 | 6.2      | 12.2     | 89.0  |
| 2008–2012 | 131.0           | 34.1     | 98.3  | 24.8     | 52.0     | 107.0 | 58.8            | 13.8     | 112.5 | 6.4      | 14.2     | 95.2  |
| -----     |                 |          |       |          |          |       |                 |          |       |          |          |       |
|           | 15–24           |          |       | 55–64    |          |       | 15–24           |          |       | 55–64    |          |       |
| 1983–1987 | 6.0             | 11.8     | 84.7  | 9.2      | 38.6     | 90.8  | 3.0             | 6.6      | 97.0  | 7.8      | 26.4     | 133.7 |
| 1988–1992 | 7.2             | 10.2     | 102.6 | 11.4     | 33.3     | 93.7  | 2.2             | 4.0      | 76.4  | 6.8      | 19.7     | 110.3 |
| 1993–1997 | 8.0             | 11.1     | 98.3  | 16.8     | 37.7     | 93.7  | 4.0             | 5.9      | 113.7 | 8.4      | 19.3     | 121.4 |
| 1998–2002 | 8.4             | 13.9     | 88.1  | 28.8     | 52.7     | 83.0  | 4.2             | 7.3      | 104.6 | 9.4      | 18.1     | 96.0  |
| 2003–2007 | 9.8             | 18.1     | 103.8 | 29.2     | 46.5     | 80.5  | 4.6             | 9.6      | 106.2 | 8.8      | 14.4     | 86.3  |
| 2008–2012 | 8.8             | 19.4     | 91.4  | 30.8     | 49.0     | 100.9 | 4.2             | 10.0     | 103.4 | 12.8     | 18.6     | 124.7 |
| -----     |                 |          |       |          |          |       |                 |          |       |          |          |       |
|           | 25–34           |          |       | 65–74    |          |       | 25–34           |          |       | 65–74    |          |       |
| 1983–1987 | 9.8             | 22.6     | 88.4  | 7.8      | 54.1     | 123.7 | 2.8             | 7.5      | 69.7  | 5.4      | 29.6     | 94.7  |
| 1988–1992 | 6.8             | 15.5     | 81.0  | 7.0      | 39.7     | 112.8 | 3.4             | 8.1      | 93.3  | 6.0      | 26.2     | 100.6 |
| 1993–1997 | 10.0            | 19.0     | 97.3  | 7.0      | 30.5     | 95.7  | 2.4             | 5.9      | 70.6  | 4.6      | 17.3     | 88.8  |
| 1998–2002 | 16.4            | 27.3     | 101.2 | 14.4     | 46.0     | 101.2 | 5.8             | 10.8     | 93.5  | 8.0      | 23.7     | 112.7 |
| 2003–2007 | 18.6            | 32.1     | 103.6 | 14.4     | 36.5     | 85.2  | 6.0             | 11.7     | 89.9  | 10.2     | 24.0     | 128.6 |
| 2008–2012 | 14.6            | 30.3     | 93.1  | 17.6     | 35.5     | 89.8  | 6.4             | 14.0     | 98.1  | 9.0      | 17.8     | 100.2 |
| -----     |                 |          |       |          |          |       |                 |          |       |          |          |       |
|           | 35–44           |          |       | >74 y/o  |          |       | 35–44           |          |       | >74 y/o  |          |       |
| 1983–1987 | 16.8            | 27.0     | 84.8  | 6.0      | 86.6     | 110.6 | 6.2             | 10.5     | 88.6  | 7.6      | 73.2     | 126.9 |
| 1988–1992 | 11.2            | 18.5     | 77.9  | 6.6      | 69.6     | 107.8 | 6.0             | 9.6      | 99.9  | 9.0      | 56.8     | 118.6 |
| 1993–1997 | 12.4            | 22.9     | 93.5  | 6.8      | 57.8     | 111.0 | 3.8             | 7.5      | 87.8  | 11.8     | 54.9     | 159.5 |
| 1998–2002 | 15.4            | 31.9     | 90.5  | 8.4      | 56.5     | 107.2 | 4.2             | 9.3      | 90.0  | 10.4     | 38.5     | 123.9 |
| 2003–2007 | 21.4            | 41.3     | 103.1 | 8.2      | 41.3     | 91.8  | 7.0             | 14.0     | 110.9 | 10.8     | 31.4     | 140.1 |
| 2008–2012 | 23.8            | 39.2     | 105.4 | 10.2     | 38.3     | 92.4  | 9.2             | 16.0     | 118.0 | 10.8     | 25.6     | 133.1 |

Secondary Medical Zone ID: 091

|           | Male            |                  |       |                 |                  |       | Female          |                  |       |                 |                  |       |
|-----------|-----------------|------------------|-------|-----------------|------------------|-------|-----------------|------------------|-------|-----------------|------------------|-------|
|           | Suicide         |                  |       | Suicide         |                  |       | Suicide         |                  |       | Suicide         |                  |       |
|           | Num<br>per year | Rate<br>/100,000 | × 100 | Num<br>per year | Rate<br>/100,000 | × 100 | Num<br>per year | Rate<br>/100,000 | × 100 | Num<br>per year | Rate<br>/100,000 | × 100 |
|           |                 |                  |       |                 |                  |       |                 |                  |       |                 |                  |       |
|           | Total (>10 y/o) |                  |       | 45–54           |                  |       | Total (>10 y/o) |                  |       | 45–54           |                  |       |
| 1983–1987 | 63.6            | 27.7             | 79.7  | 14.0            | 33.3             | 65.9  | 36.2            | 15.3             | 99.2  | 4.8             | 13.5             | 78.1  |
| 1988–1992 | 58.6            | 20.8             | 81.6  | 14.8            | 27.1             | 78.8  | 36.0            | 12.3             | 94.5  | 7.0             | 13.6             | 92.9  |
| 1993–1997 | 68.0            | 20.8             | 80.1  | 16.6            | 26.9             | 73.5  | 42.2            | 11.5             | 109.8 | 9.0             | 13.8             | 106.8 |
| 1998–2002 | 106.8           | 29.6             | 80.4  | 26.0            | 43.3             | 77.3  | 42.2            | 11.4             | 87.7  | 6.8             | 11.9             | 78.7  |
| 2003–2007 | 119.2           | 32.5             | 85.9  | 21.4            | 42.2             | 75.4  | 50.0            | 13.0             | 100.6 | 8.0             | 14.9             | 108.8 |
| 2008–2012 | 121.2           | 32.9             | 92.5  | 21.2            | 44.9             | 92.4  | 55.0            | 14.0             | 106.6 | 8.4             | 17.3             | 116.0 |
|           | 15–24           |                  |       | 55–64           |                  |       | 15–24           |                  |       | 55–64           |                  |       |
| 1983–1987 | 6.8             | 13.8             | 99.3  | 9.2             | 39.6             | 93.2  | 4.4             | 8.7              | 128.0 | 5.8             | 22.3             | 112.8 |
| 1988–1992 | 5.8             | 9.2              | 93.2  | 10.2            | 30.8             | 86.7  | 4.2             | 6.5              | 122.6 | 5.2             | 16.7             | 93.3  |
| 1993–1997 | 7.8             | 11.9             | 105.2 | 13.4            | 31.4             | 77.9  | 5.0             | 7.3              | 140.0 | 7.2             | 17.1             | 107.8 |
| 1998–2002 | 6.8             | 13.0             | 82.5  | 28.4            | 53.1             | 83.6  | 4.0             | 7.3              | 104.4 | 9.4             | 18.1             | 96.1  |
| 2003–2007 | 9.2             | 18.9             | 108.1 | 25.6            | 42.6             | 73.8  | 5.0             | 10.5             | 117.0 | 10.0            | 16.1             | 96.4  |
| 2008–2012 | 9.4             | 22.0             | 103.8 | 24.6            | 42.1             | 86.6  | 4.2             | 10.2             | 105.4 | 8.8             | 14.3             | 96.1  |
|           | 25–34           |                  |       | 65–74           |                  |       | 25–34           |                  |       | 65–74           |                  |       |
| 1983–1987 | 9.2             | 21.2             | 82.9  | 6.6             | 53.0             | 121.2 | 4.6             | 10.4             | 96.4  | 5.2             | 33.3             | 106.7 |
| 1988–1992 | 7.4             | 15.9             | 83.4  | 4.4             | 29.8             | 84.6  | 4.0             | 8.8              | 101.6 | 6.8             | 32.4             | 124.0 |
| 1993–1997 | 10.2            | 18.6             | 95.1  | 5.0             | 24.3             | 76.3  | 4.6             | 8.8              | 105.8 | 4.4             | 18.0             | 92.2  |
| 1998–2002 | 14.2            | 24.0             | 88.7  | 9.4             | 33.4             | 73.4  | 6.4             | 11.4             | 98.8  | 4.2             | 15.2             | 72.2  |
| 2003–2007 | 19.8            | 33.7             | 108.8 | 15.0            | 38.0             | 88.7  | 8.8             | 15.6             | 119.9 | 5.6             | 15.2             | 81.4  |
| 2008–2012 | 18.0            | 35.6             | 109.4 | 15.6            | 32.7             | 82.8  | 8.2             | 16.9             | 117.9 | 8.2             | 16.6             | 93.3  |
|           | 35–44           |                  |       | >74 y/o         |                  |       | 35–44           |                  |       | >74 y/o         |                  |       |
| 1983–1987 | 14.0            | 22.9             | 72.0  | 3.4             | 67.8             | 86.6  | 5.6             | 9.6              | 81.1  | 5.4             | 64.9             | 112.5 |
| 1988–1992 | 11.4            | 19.0             | 80.3  | 4.4             | 57.4             | 89.0  | 4.0             | 7.3              | 75.9  | 4.8             | 37.0             | 77.3  |
| 1993–1997 | 10.4            | 20.1             | 81.8  | 4.2             | 42.8             | 82.2  | 4.4             | 8.4              | 99.0  | 7.6             | 40.6             | 118.1 |
| 1998–2002 | 12.4            | 26.0             | 73.8  | 8.6             | 59.2             | 112.4 | 3.8             | 8.6              | 83.1  | 7.2             | 29.5             | 95.1  |
| 2003–2007 | 21.0            | 39.1             | 97.5  | 7.2             | 37.2             | 82.7  | 7.4             | 14.2             | 112.7 | 5.2             | 17.0             | 75.9  |
| 2008–2012 | 21.4            | 35.3             | 94.8  | 10.4            | 38.8             | 93.5  | 8.6             | 14.9             | 109.9 | 8.4             | 20.8             | 108.0 |

Secondary Medical Zone ID: 092

|           | Male            |                  |       |                 |                  |       | Female          |                  |       |                 |                  |       |
|-----------|-----------------|------------------|-------|-----------------|------------------|-------|-----------------|------------------|-------|-----------------|------------------|-------|
|           | Suicide         |                  |       | Suicide         |                  |       | Suicide         |                  |       | Suicide         |                  |       |
|           | Num<br>per year | Rate<br>/100,000 | × 100 | Num<br>per year | Rate<br>/100,000 | × 100 | Num<br>per year | Rate<br>/100,000 | × 100 | Num<br>per year | Rate<br>/100,000 | × 100 |
|           |                 |                  |       |                 |                  |       |                 |                  |       |                 |                  |       |
|           | Total (>10 y/o) |                  |       | 45–54           |                  |       | Total (>10 y/o) |                  |       | 45–54           |                  |       |
| 1983–1987 | 70.4            | 32.4             | 98.6  | 19.2            | 51.0             | 100.8 | 44.6            | 18.2             | 125.4 | 7.8             | 21.4             | 124.2 |
| 1988–1992 | 59.4            | 23.8             | 94.8  | 13.4            | 29.1             | 84.8  | 42.2            | 14.6             | 119.9 | 8.0             | 17.4             | 118.9 |
| 1993–1997 | 65.6            | 22.9             | 88.8  | 14.2            | 26.7             | 73.0  | 37.4            | 11.3             | 109.2 | 6.2             | 11.9             | 91.9  |
| 1998–2002 | 108.4           | 33.7             | 93.4  | 26.6            | 47.7             | 85.3  | 48.0            | 13.3             | 110.6 | 8.0             | 14.5             | 96.6  |
| 2003–2007 | 108.0           | 33.6             | 90.7  | 20.6            | 44.0             | 78.6  | 48.6            | 13.5             | 112.2 | 6.8             | 14.1             | 103.1 |
| 2008–2012 | 101.8           | 33.0             | 91.8  | 16.2            | 40.9             | 84.1  | 45.4            | 12.8             | 104.3 | 6.0             | 14.8             | 99.5  |
|           | 15–24           |                  |       | 55–64           |                  |       | 15–24           |                  |       | 55–64           |                  |       |
| 1983–1987 | 6.4             | 15.7             | 112.9 | 9.8             | 42.4             | 99.8  | 2.8             | 7.2              | 105.5 | 5.6             | 21.2             | 107.2 |
| 1988–1992 | 3.4             | 7.7              | 78.2  | 8.4             | 28.9             | 81.4  | 1.4             | 3.7              | 69.6  | 7.6             | 23.0             | 128.5 |
| 1993–1997 | 7.0             | 12.7             | 112.4 | 13.0            | 35.0             | 86.9  | 2.0             | 4.4              | 83.7  | 6.2             | 17.0             | 106.9 |
| 1998–2002 | 7.4             | 15.7             | 99.1  | 23.6            | 51.8             | 81.6  | 3.0             | 6.9              | 97.7  | 7.8             | 18.0             | 95.8  |
| 2003–2007 | 7.4             | 17.9             | 102.6 | 23.8            | 44.9             | 77.9  | 6.0             | 13.9             | 154.8 | 8.4             | 16.0             | 95.8  |
| 2008–2012 | 8.0             | 22.2             | 104.6 | 23.2            | 42.7             | 88.0  | 3.0             | 9.4              | 96.7  | 9.0             | 15.8             | 106.1 |
|           | 25–34           |                  |       | 65–74           |                  |       | 25–34           |                  |       | 65–74           |                  |       |
| 1983–1987 | 7.6             | 21.4             | 83.6  | 7.6             | 54.1             | 123.7 | 4.2             | 11.1             | 102.7 | 8.0             | 41.7             | 133.3 |
| 1988–1992 | 6.4             | 18.0             | 94.2  | 5.2             | 33.0             | 93.6  | 3.4             | 9.2              | 106.3 | 7.8             | 34.5             | 132.1 |
| 1993–1997 | 9.2             | 21.9             | 111.9 | 7.2             | 33.5             | 105.1 | 3.2             | 8.1              | 97.8  | 5.8             | 22.0             | 113.0 |
| 1998–2002 | 13.8            | 29.2             | 108.3 | 14.6            | 51.7             | 113.8 | 5.4             | 12.1             | 104.4 | 6.8             | 22.6             | 107.5 |
| 2003–2007 | 15.2            | 33.1             | 106.8 | 14.0            | 41.3             | 96.2  | 5.0             | 12.3             | 94.3  | 8.0             | 22.1             | 118.6 |
| 2008–2012 | 17.0            | 41.1             | 126.1 | 12.2            | 30.8             | 78.1  | 5.0             | 13.9             | 97.0  | 8.4             | 19.5             | 109.6 |
|           | 35–44           |                  |       | >74 y/o         |                  |       | 35–44           |                  |       | >74 y/o         |                  |       |
| 1983–1987 | 13.6            | 26.5             | 83.4  | 5.8             | 88.2             | 112.7 | 7.6             | 14.1             | 119.1 | 8.2             | 80.7             | 139.9 |
| 1988–1992 | 14.2            | 26.1             | 110.0 | 8.2             | 88.4             | 137.1 | 3.8             | 7.9              | 81.9  | 10.2            | 69.7             | 145.6 |
| 1993–1997 | 9.2             | 19.9             | 81.1  | 5.6             | 51.9             | 99.6  | 3.4             | 7.5              | 88.7  | 10.6            | 54.6             | 158.5 |
| 1998–2002 | 12.6            | 30.5             | 86.7  | 9.6             | 66.7             | 126.5 | 4.6             | 10.8             | 104.8 | 12.2            | 48.2             | 155.2 |
| 2003–2007 | 16.4            | 39.2             | 97.8  | 10.4            | 54.9             | 121.9 | 4.0             | 10.8             | 85.4  | 10.4            | 32.9             | 146.5 |
| 2008–2012 | 16.2            | 35.1             | 94.3  | 8.6             | 36.8             | 88.8  | 4.4             | 11.3             | 83.4  | 9.4             | 24.5             | 127.4 |

Secondary Medical Zone ID: 093

|           | Male            |          |       |          |          |       | Female          |          |       |          |          |       |
|-----------|-----------------|----------|-------|----------|----------|-------|-----------------|----------|-------|----------|----------|-------|
|           | Suicide         |          |       | Suicide  |          |       | Suicide         |          |       | Suicide  |          |       |
|           | Num             | Rate     | × 100 | Num      | Rate     | × 100 | Num             | Rate     | × 100 | Num      | Rate     | × 100 |
|           | per year        | /100,000 |       | per year | /100,000 |       | per year        | /100,000 |       | per year | /100,000 |       |
|           | Total (>10 y/o) |          |       | 45–54    |          |       | Total (>10 y/o) |          |       | 45–54    |          |       |
| 1983–1987 | 60.4            | 32.4     | 99.0  | 12.6     | 43.2     | 85.5  | 32.8            | 15.8     | 104.8 | 4.8      | 17.0     | 98.4  |
| 1988–1992 | 47.4            | 22.9     | 91.6  | 9.0      | 27.1     | 79.0  | 41.2            | 15.6     | 133.0 | 5.0      | 15.1     | 103.6 |
| 1993–1997 | 60.0            | 25.4     | 101.5 | 11.6     | 29.5     | 80.8  | 33.4            | 12.0     | 116.8 | 5.0      | 12.9     | 100.0 |
| 1998–2002 | 88.2            | 34.8     | 97.5  | 22.8     | 53.5     | 95.5  | 39.2            | 13.3     | 112.0 | 8.8      | 19.5     | 129.5 |
| 2003–2007 | 86.0            | 34.5     | 92.7  | 17.0     | 46.3     | 82.8  | 34.0            | 12.7     | 100.5 | 6.0      | 15.6     | 114.1 |
| 2008–2012 | 89.2            | 35.7     | 103.1 | 17.6     | 52.4     | 107.9 | 34.8            | 12.9     | 102.6 | 5.8      | 17.2     | 115.3 |
|           | 15–24           |          |       | 55–64    |          |       | 15–24           |          |       | 55–64    |          |       |
| 1983–1987 | 5.2             | 15.2     | 108.9 | 8.8      | 41.2     | 96.9  | 2.2             | 7.0      | 102.5 | 5.8      | 22.2     | 112.3 |
| 1988–1992 | 4.6             | 11.0     | 111.2 | 7.2      | 28.9     | 81.5  | 3.0             | 7.2      | 135.6 | 6.6      | 22.1     | 123.8 |
| 1993–1997 | 4.2             | 10.7     | 94.6  | 13.2     | 43.7     | 108.6 | 1.6             | 4.7      | 89.2  | 5.4      | 17.7     | 111.3 |
| 1998–2002 | 4.6             | 13.6     | 86.4  | 18.8     | 56.6     | 89.1  | 2.2             | 6.8      | 96.7  | 6.8      | 20.2     | 107.3 |
| 2003–2007 | 7.8             | 22.4     | 128.2 | 19.6     | 50.5     | 87.5  | 2.4             | 8.6      | 95.1  | 5.2      | 14.7     | 87.6  |
| 2008–2012 | 7.2             | 24.8     | 116.9 | 18.6     | 45.5     | 93.7  | 2.0             | 8.5      | 88.1  | 4.6      | 12.5     | 84.1  |
|           | 25–34           |          |       | 65–74    |          |       | 25–34           |          |       | 65–74    |          |       |
| 1983–1987 | 10.4            | 30.2     | 118.2 | 8.0      | 57.1     | 130.5 | 4.0             | 12.0     | 111.2 | 6.4      | 36.1     | 115.5 |
| 1988–1992 | 5.8             | 18.5     | 96.7  | 7.2      | 44.3     | 125.9 | 2.0             | 7.4      | 85.9  | 7.8      | 35.5     | 136.1 |
| 1993–1997 | 9.8             | 26.8     | 137.1 | 7.4      | 37.2     | 116.6 | 1.8             | 6.7      | 80.6  | 7.2      | 27.7     | 142.2 |
| 1998–2002 | 11.0            | 28.9     | 107.0 | 12.4     | 52.3     | 115.0 | 3.4             | 10.5     | 90.8  | 6.4      | 23.6     | 112.5 |
| 2003–2007 | 12.2            | 33.1     | 106.8 | 8.8      | 35.6     | 82.9  | 4.2             | 12.9     | 98.9  | 4.6      | 17.1     | 91.8  |
| 2008–2012 | 9.2             | 30.7     | 94.1  | 12.0     | 40.0     | 101.4 | 3.0             | 12.1     | 84.3  | 6.2      | 19.4     | 108.9 |
|           | 35–44           |          |       | >74 y/o  |          |       | 35–44           |          |       | >74 y/o  |          |       |
| 1983–1987 | 10.0            | 25.9     | 81.5  | 5.4      | 82.5     | 105.4 | 3.4             | 9.9      | 84.1  | 6.0      | 58.6     | 101.6 |
| 1988–1992 | 8.6             | 21.0     | 88.7  | 4.8      | 58.2     | 90.2  | 5.2             | 11.8     | 122.7 | 11.4     | 77.4     | 161.8 |
| 1993–1997 | 7.0             | 19.4     | 79.1  | 6.0      | 57.4     | 110.2 | 4.8             | 11.7     | 138.0 | 7.4      | 40.9     | 119.0 |
| 1998–2002 | 11.8            | 34.4     | 97.7  | 6.2      | 49.9     | 94.6  | 3.0             | 9.6      | 92.5  | 8.6      | 37.1     | 119.4 |
| 2003–2007 | 12.8            | 37.5     | 93.6  | 7.6      | 46.0     | 102.1 | 4.4             | 13.3     | 105.1 | 7.2      | 25.4     | 113.4 |
| 2008–2012 | 16.0            | 41.5     | 111.6 | 8.2      | 41.1     | 99.1  | 5.6             | 15.3     | 113.1 | 7.6      | 22.5     | 117.1 |

Secondary Medical Zone ID: 094

|           | Male            |          |       |          |          |       | Female          |          |       |          |          |       |
|-----------|-----------------|----------|-------|----------|----------|-------|-----------------|----------|-------|----------|----------|-------|
|           | Suicide         |          |       | Suicide  |          |       | Suicide         |          |       | Suicide  |          |       |
|           | Num             | Rate     | × 100 | Num      | Rate     | × 100 | Num             | Rate     | × 100 | Num      | Rate     | × 100 |
|           | per year        | /100,000 |       | per year | /100,000 |       | per year        | /100,000 |       | per year | /100,000 |       |
|           | Total (>10 y/o) |          |       | 45–54    |          |       | Total (>10 y/o) |          |       | 45–54    |          |       |
| 1983–1987 | 22.0            | 37.0     | 123.8 | 4.2      | 50.1     | 99.0  | 11.4            | 16.6     | 114.7 | 0.8      | 14.3     | 82.9  |
| 1988–1992 | 16.0            | 26.3     | 113.9 | 3.8      | 41.0     | 119.5 | 15.2            | 16.2     | 154.6 | 2.0      | 17.6     | 120.3 |
| 1993–1997 | 17.8            | 27.3     | 118.1 | 2.4      | 32.1     | 87.8  | 12.6            | 13.3     | 146.1 | 1.0      | 12.6     | 97.7  |
| 1998–2002 | 22.2            | 36.1     | 105.7 | 4.6      | 53.2     | 95.1  | 13.8            | 14.8     | 137.9 | 2.0      | 17.6     | 117.0 |
| 2003–2007 | 21.4            | 36.9     | 104.7 | 2.8      | 41.8     | 74.7  | 10.0            | 13.1     | 115.0 | 1.8      | 16.5     | 120.7 |
| 2008–2012 | 18.8            | 35.3     | 102.8 | 3.6      | 50.0     | 102.9 | 10.4            | 13.0     | 119.1 | 0.8      | 14.0     | 94.0  |
| -----     |                 |          |       |          |          |       |                 |          |       |          |          |       |
|           | 15–24           |          |       | 55–64    |          |       | 15–24           |          |       | 55–64    |          |       |
| 1983–1987 | 1.4             | 15.8     | 113.4 | 3.6      | 45.9     | 108.0 | 1.0             | 8.5      | 124.7 | 1.2      | 17.3     | 87.4  |
| 1988–1992 | 0.8             | 10.0     | 101.4 | 3.4      | 39.1     | 110.0 | 0.6             | 5.9      | 112.5 | 1.6      | 17.9     | 100.3 |
| 1993–1997 | 0.6             | 10.4     | 92.2  | 3.6      | 42.7     | 106.0 | 0.8             | 6.7      | 128.1 | 1.6      | 17.2     | 108.2 |
| 1998–2002 | 1.0             | 15.6     | 99.0  | 5.4      | 67.1     | 105.7 | 0.4             | 6.9      | 97.9  | 2.4      | 22.5     | 119.5 |
| 2003–2007 | 1.6             | 20.3     | 116.6 | 4.4      | 55.1     | 95.4  | 0.8             | 10.5     | 116.4 | 2.2      | 19.8     | 118.0 |
| 2008–2012 | 1.2             | 22.1     | 104.1 | 2.8      | 40.8     | 83.9  | 0.4             | 9.3      | 96.3  | 1.6      | 16.1     | 107.7 |
| -----     |                 |          |       |          |          |       |                 |          |       |          |          |       |
|           | 25–34           |          |       | 65–74    |          |       | 25–34           |          |       | 65–74    |          |       |
| 1983–1987 | 2.8             | 29.9     | 117.1 | 2.4      | 51.4     | 117.4 | 1.6             | 14.1     | 130.6 | 3.0      | 43.0     | 137.7 |
| 1988–1992 | 1.6             | 20.3     | 106.3 | 2.8      | 45.4     | 128.9 | 1.4             | 11.8     | 135.9 | 4.2      | 47.1     | 180.4 |
| 1993–1997 | 1.8             | 21.9     | 111.9 | 4.0      | 49.4     | 154.8 | 1.4             | 11.5     | 137.9 | 2.4      | 25.4     | 130.2 |
| 1998–2002 | 1.4             | 24.4     | 90.5  | 5.0      | 59.1     | 129.9 | 1.6             | 14.7     | 127.2 | 2.2      | 23.7     | 112.7 |
| 2003–2007 | 1.4             | 27.5     | 88.6  | 3.8      | 49.5     | 115.3 | 0.2             | 10.6     | 81.2  | 1.4      | 18.3     | 98.4  |
| 2008–2012 | 2.0             | 34.4     | 105.7 | 3.2      | 42.9     | 108.7 | 0.2             | 12.2     | 84.8  | 2.2      | 21.7     | 121.8 |
| -----     |                 |          |       |          |          |       |                 |          |       |          |          |       |
|           | 35–44           |          |       | >74 y/o  |          |       | 35–44           |          |       | >74 y/o  |          |       |
| 1983–1987 | 3.6             | 36.6     | 115.1 | 3.8      | 123.5    | 157.7 | 0.8             | 11.1     | 93.6  | 3.0      | 75.1     | 130.1 |
| 1988–1992 | 1.8             | 21.6     | 91.0  | 1.8      | 65.2     | 101.0 | 1.6             | 12.1     | 125.7 | 3.8      | 74.1     | 154.9 |
| 1993–1997 | 3.2             | 31.6     | 128.9 | 2.2      | 61.3     | 117.7 | 1.6             | 12.2     | 143.0 | 3.8      | 59.2     | 172.0 |
| 1998–2002 | 2.4             | 33.6     | 95.4  | 2.4      | 56.3     | 106.7 | 0.8             | 10.6     | 103.0 | 4.4      | 53.4     | 172.1 |
| 2003–2007 | 4.0             | 50.6     | 126.2 | 3.4      | 56.7     | 126.0 | 0.2             | 10.1     | 80.0  | 3.4      | 33.8     | 150.6 |
| 2008–2012 | 3.4             | 42.2     | 113.5 | 2.6      | 42.1     | 101.4 | 0.6             | 12.6     | 92.9  | 4.6      | 35.2     | 183.2 |

Secondary Medical Zone ID: 095

|           | Male            |          |       |          |          |       | Female          |          |       |          |          |       |
|-----------|-----------------|----------|-------|----------|----------|-------|-----------------|----------|-------|----------|----------|-------|
|           | Suicide         |          |       | Suicide  |          |       | Suicide         |          |       | Suicide  |          |       |
|           | Num             | Rate     | × 100 | Num      | Rate     | × 100 | Num             | Rate     | × 100 | Num      | Rate     | × 100 |
|           | per year        | /100,000 |       | per year | /100,000 |       | per year        | /100,000 |       | per year | /100,000 |       |
|           | Total (>10 y/o) |          |       | 45–54    |          |       | Total (>10 y/o) |          |       | 45–54    |          |       |
| 1983–1987 | 84.0            | 28.8     | 86.1  | 23.2     | 41.2     | 81.6  | 37.8            | 13.7     | 86.5  | 6.0      | 13.1     | 75.8  |
| 1988–1992 | 59.4            | 18.5     | 71.8  | 17.0     | 26.1     | 75.9  | 36.6            | 11.0     | 84.7  | 6.2      | 10.8     | 73.7  |
| 1993–1997 | 81.6            | 21.3     | 83.8  | 21.6     | 30.7     | 83.8  | 32.4            | 8.6      | 77.5  | 8.4      | 11.8     | 91.3  |
| 1998–2002 | 126.6           | 30.1     | 83.0  | 29.6     | 45.7     | 81.7  | 46.0            | 11.0     | 84.6  | 9.4      | 14.2     | 94.2  |
| 2003–2007 | 129.0           | 30.0     | 80.6  | 26.0     | 45.9     | 82.1  | 47.8            | 11.3     | 84.8  | 4.6      | 9.5      | 69.3  |
| 2008–2012 | 133.6           | 31.8     | 89.5  | 28.4     | 50.0     | 102.9 | 47.8            | 11.2     | 83.1  | 7.2      | 13.8     | 92.4  |
| -----     |                 |          |       |          |          |       |                 |          |       |          |          |       |
|           | 15–24           |          |       | 55–64    |          |       | 15–24           |          |       | 55–64    |          |       |
| 1983–1987 | 8.0             | 13.1     | 94.2  | 9.6      | 36.9     | 86.8  | 4.8             | 7.9      | 115.5 | 5.4      | 19.5     | 98.8  |
| 1988–1992 | 7.0             | 9.4      | 95.2  | 10.8     | 27.6     | 77.8  | 4.4             | 6.1      | 115.7 | 7.2      | 18.9     | 105.6 |
| 1993–1997 | 9.0             | 12.0     | 106.4 | 18.6     | 35.3     | 87.7  | 2.2             | 3.8      | 71.9  | 6.2      | 13.3     | 83.5  |
| 1998–2002 | 7.6             | 13.1     | 82.8  | 34.4     | 55.1     | 86.7  | 5.0             | 8.4      | 119.9 | 9.2      | 15.7     | 83.3  |
| 2003–2007 | 6.6             | 13.7     | 78.6  | 34.6     | 51.1     | 88.5  | 3.6             | 7.9      | 87.5  | 9.6      | 14.2     | 84.7  |
| 2008–2012 | 10.0            | 22.2     | 104.6 | 27.2     | 43.5     | 89.6  | 3.6             | 8.9      | 91.4  | 6.6      | 11.1     | 74.3  |
| -----     |                 |          |       |          |          |       |                 |          |       |          |          |       |
|           | 25–34           |          |       | 65–74    |          |       | 25–34           |          |       | 65–74    |          |       |
| 1983–1987 | 12.2            | 22.5     | 88.2  | 5.4      | 42.3     | 96.7  | 6.4             | 11.4     | 105.8 | 3.2      | 21.4     | 68.6  |
| 1988–1992 | 7.4             | 13.8     | 72.0  | 3.6      | 24.8     | 70.5  | 3.6             | 7.2      | 82.7  | 2.6      | 14.8     | 56.6  |
| 1993–1997 | 12.0            | 17.8     | 91.1  | 6.0      | 26.1     | 81.8  | 4.0             | 6.9      | 82.7  | 4.4      | 16.8     | 86.2  |
| 1998–2002 | 21.0            | 27.6     | 102.0 | 14.0     | 39.8     | 87.5  | 6.6             | 9.9      | 85.3  | 5.8      | 17.1     | 81.5  |
| 2003–2007 | 20.4            | 29.4     | 94.9  | 16.0     | 34.2     | 79.6  | 9.0             | 13.4     | 102.9 | 5.8      | 13.4     | 72.1  |
| 2008–2012 | 14.6            | 27.9     | 85.7  | 18.6     | 32.9     | 83.3  | 5.8             | 11.7     | 81.5  | 8.6      | 15.0     | 84.1  |
| -----     |                 |          |       |          |          |       |                 |          |       |          |          |       |
|           | 35–44           |          |       | >74 y/o  |          |       | 35–44           |          |       | >74 y/o  |          |       |
| 1983–1987 | 21.4            | 28.5     | 89.5  | 3.8      | 65.5     | 83.6  | 6.0             | 8.5      | 71.8  | 5.6      | 58.0     | 100.5 |
| 1988–1992 | 9.6             | 15.0     | 63.4  | 3.8      | 48.4     | 75.1  | 6.6             | 9.5      | 98.5  | 5.4      | 38.3     | 80.1  |
| 1993–1997 | 9.4             | 16.9     | 69.1  | 5.0      | 46.9     | 90.1  | 1.8             | 4.4      | 52.2  | 5.4      | 28.5     | 82.8  |
| 1998–2002 | 14.0            | 24.6     | 70.0  | 6.0      | 42.1     | 80.0  | 4.8             | 9.1      | 87.6  | 5.2      | 21.6     | 69.5  |
| 2003–2007 | 18.4            | 27.6     | 68.8  | 6.6      | 32.3     | 71.6  | 10.0            | 14.9     | 117.8 | 5.2      | 16.1     | 71.9  |
| 2008–2012 | 24.8            | 33.4     | 89.9  | 9.8      | 32.2     | 77.7  | 8.6             | 12.2     | 90.3  | 7.4      | 16.9     | 88.1  |



Secondary Medical Zone ID: 096

|           | Male            |                  |       |                 |                  |       | Female          |                  |       |                 |                  |       |
|-----------|-----------------|------------------|-------|-----------------|------------------|-------|-----------------|------------------|-------|-----------------|------------------|-------|
|           | Suicide         |                  |       | Suicide         |                  |       | Suicide         |                  |       | Suicide         |                  |       |
|           | Num<br>per year | Rate<br>/100,000 | × 100 | Num<br>per year | Rate<br>/100,000 | × 100 | Num<br>per year | Rate<br>/100,000 | × 100 | Num<br>per year | Rate<br>/100,000 | × 100 |
|           |                 |                  |       |                 |                  |       |                 |                  |       |                 |                  |       |
|           | Total (>10 y/o) |                  |       | 45–54           |                  |       | Total (>10 y/o) |                  |       | 45–54           |                  |       |
| 1983–1987 | 126.0           | 25.4             | 74.1  | 32.2            | 34.7             | 68.5  | 61.6            | 12.9             | 81.9  | 10.4            | 12.8             | 74.3  |
| 1988–1992 | 106.8           | 18.6             | 71.9  | 28.4            | 25.5             | 74.2  | 70.2            | 11.9             | 92.6  | 15.0            | 13.9             | 95.1  |
| 1993–1997 | 138.6           | 20.8             | 80.7  | 34.4            | 28.5             | 77.8  | 61.6            | 9.2              | 84.2  | 12.0            | 10.2             | 78.7  |
| 1998–2002 | 208.4           | 28.2             | 77.8  | 51.4            | 45.6             | 81.5  | 78.2            | 10.7             | 83.1  | 13.6            | 12.3             | 81.7  |
| 2003–2007 | 225.4           | 29.2             | 79.4  | 38.8            | 39.7             | 70.9  | 91.4            | 12.0             | 92.3  | 10.4            | 11.3             | 82.1  |
| 2008–2012 | 222.0           | 29.0             | 82.2  | 38.0            | 37.6             | 77.4  | 108.4           | 13.1             | 103.8 | 10.6            | 11.9             | 79.6  |
|           | 15–24           |                  |       | 55–64           |                  |       | 15–24           |                  |       | 55–64           |                  |       |
| 1983–1987 | 12.8            | 11.5             | 82.1  | 17.8            | 38.4             | 90.5  | 6.4             | 6.4              | 94.2  | 6.2             | 14.1             | 71.6  |
| 1988–1992 | 9.8             | 7.4              | 74.6  | 18.6            | 27.3             | 76.8  | 4.2             | 3.7              | 70.5  | 10.2            | 16.0             | 89.9  |
| 1993–1997 | 12.8            | 9.7              | 86.1  | 31.2            | 35.3             | 87.6  | 4.6             | 4.1              | 79.3  | 13.2            | 15.8             | 99.4  |
| 1998–2002 | 15.8            | 14.4             | 90.9  | 51.6            | 49.9             | 78.5  | 7.4             | 7.5              | 107.2 | 14.6            | 14.8             | 78.6  |
| 2003–2007 | 17.4            | 18.6             | 106.4 | 56.2            | 49.5             | 85.8  | 7.6             | 9.2              | 102.1 | 15.8            | 13.9             | 82.9  |
| 2008–2012 | 18.8            | 22.6             | 106.5 | 42.6            | 40.7             | 83.9  | 6.2             | 8.4              | 86.4  | 21.2            | 18.4             | 123.2 |
|           | 25–34           |                  |       | 65–74           |                  |       | 25–34           |                  |       | 65–74           |                  |       |
| 1983–1987 | 14.6            | 14.9             | 58.2  | 7.4             | 34.7             | 79.3  | 8.4             | 8.7              | 80.7  | 9.0             | 30.0             | 95.9  |
| 1988–1992 | 14.6            | 12.8             | 66.7  | 5.8             | 22.6             | 64.2  | 8.6             | 8.3              | 95.8  | 7.4             | 20.8             | 79.9  |
| 1993–1997 | 19.8            | 14.6             | 74.9  | 8.6             | 22.3             | 70.0  | 7.4             | 6.5              | 78.5  | 10.0            | 21.4             | 109.8 |
| 1998–2002 | 32.0            | 21.4             | 79.2  | 21.4            | 37.2             | 81.8  | 16.2            | 12.0             | 103.6 | 10.2            | 17.5             | 83.4  |
| 2003–2007 | 35.0            | 24.7             | 79.7  | 23.8            | 31.8             | 74.1  | 17.0            | 12.9             | 99.2  | 12.2            | 16.0             | 85.8  |
| 2008–2012 | 33.2            | 28.3             | 86.9  | 28.8            | 32.0             | 81.0  | 17.8            | 15.6             | 108.9 | 19.4            | 19.6             | 109.9 |
|           | 35–44           |                  |       | >74 y/o         |                  |       | 35–44           |                  |       | >74 y/o         |                  |       |
| 1983–1987 | 32.0            | 24.9             | 78.1  | 8.4             | 79.6             | 101.6 | 11.8            | 9.5              | 80.5  | 8.8             | 54.7             | 94.7  |
| 1988–1992 | 19.6            | 16.6             | 70.0  | 9.8             | 66.3             | 102.8 | 11.2            | 9.4              | 97.3  | 13.4            | 54.2             | 113.2 |
| 1993–1997 | 21.8            | 21.2             | 86.3  | 9.6             | 53.0             | 101.8 | 6.0             | 6.4              | 75.9  | 8.4             | 26.8             | 77.7  |
| 1998–2002 | 27.0            | 25.2             | 71.5  | 8.4             | 36.8             | 69.9  | 7.2             | 7.8              | 75.6  | 9.0             | 22.4             | 72.0  |
| 2003–2007 | 40.8            | 31.4             | 78.3  | 13.4            | 38.8             | 86.1  | 17.6            | 14.7             | 116.6 | 10.8            | 19.9             | 88.7  |
| 2008–2012 | 44.0            | 30.1             | 80.8  | 16.0            | 32.7             | 78.8  | 19.8            | 14.3             | 105.8 | 13.4            | 18.9             | 98.1  |

Secondary Medical Zone ID: 097

|           | Male            |                  |       |                 |                  |       | Female          |                  |       |                 |                  |       |
|-----------|-----------------|------------------|-------|-----------------|------------------|-------|-----------------|------------------|-------|-----------------|------------------|-------|
|           | Suicide         |                  |       | Suicide         |                  |       | Suicide         |                  |       | Suicide         |                  |       |
|           | Num<br>per year | Rate<br>/100,000 | × 100 | Num<br>per year | Rate<br>/100,000 | × 100 | Num<br>per year | Rate<br>/100,000 | × 100 | Num<br>per year | Rate<br>/100,000 | × 100 |
|           |                 |                  |       |                 |                  |       |                 |                  |       |                 |                  |       |
|           | Total (>10 y/o) |                  |       | 45–54           |                  |       | Total (>10 y/o) |                  |       | 45–54           |                  |       |
| 1983–1987 | 102.2           | 26.0             | 74.9  | 26.4            | 34.9             | 69.0  | 59.6            | 15.0             | 96.2  | 9.4             | 14.1             | 81.6  |
| 1988–1992 | 100.2           | 21.1             | 82.9  | 27.0            | 28.8             | 83.8  | 56.0            | 11.6             | 89.1  | 9.6             | 11.3             | 77.2  |
| 1993–1997 | 120.8           | 21.9             | 85.8  | 34.4            | 32.9             | 90.0  | 54.4            | 9.7              | 88.0  | 11.2            | 10.8             | 83.9  |
| 1998–2002 | 175.4           | 29.5             | 80.5  | 42.8            | 45.0             | 80.4  | 75.6            | 11.9             | 94.9  | 13.0            | 13.2             | 87.6  |
| 2003–2007 | 183.4           | 30.4             | 81.0  | 34.2            | 43.1             | 77.0  | 84.2            | 12.8             | 102.7 | 10.6            | 13.0             | 94.6  |
| 2008–2012 | 192.4           | 31.6             | 90.0  | 30.2            | 40.2             | 82.6  | 89.0            | 13.5             | 104.8 | 10.8            | 14.6             | 97.5  |
|           | 15–24           |                  |       | 55–64           |                  |       | 15–24           |                  |       | 55–64           |                  |       |
| 1983–1987 | 10.8            | 12.6             | 90.2  | 12.4            | 32.8             | 77.3  | 5.0             | 6.4              | 93.3  | 7.0             | 17.9             | 90.5  |
| 1988–1992 | 11.8            | 10.6             | 107.0 | 13.2            | 23.8             | 67.1  | 5.6             | 5.6              | 105.3 | 8.0             | 15.2             | 85.3  |
| 1993–1997 | 9.4             | 9.1              | 80.4  | 25.2            | 34.0             | 84.4  | 4.6             | 4.7              | 90.7  | 10.6            | 15.2             | 95.3  |
| 1998–2002 | 13.8            | 15.3             | 97.0  | 41.0            | 46.4             | 73.0  | 7.4             | 8.5              | 120.6 | 16.4            | 18.5             | 98.4  |
| 2003–2007 | 11.8            | 16.0             | 91.9  | 37.8            | 38.9             | 67.3  | 5.4             | 8.0              | 88.7  | 14.6            | 14.5             | 86.5  |
| 2008–2012 | 13.8            | 21.4             | 100.7 | 40.6            | 44.0             | 90.7  | 5.0             | 8.6              | 88.9  | 16.4            | 16.1             | 107.7 |
|           | 25–34           |                  |       | 65–74           |                  |       | 25–34           |                  |       | 65–74           |                  |       |
| 1983–1987 | 12.6            | 17.4             | 68.1  | 8.6             | 45.6             | 104.1 | 6.0             | 8.2              | 76.6  | 11.4            | 42.9             | 137.2 |
| 1988–1992 | 13.4            | 16.2             | 85.0  | 8.8             | 35.5             | 100.8 | 6.4             | 8.3              | 95.7  | 8.8             | 27.7             | 106.0 |
| 1993–1997 | 15.6            | 16.4             | 83.9  | 7.2             | 21.6             | 67.7  | 5.0             | 6.2              | 74.2  | 7.6             | 19.0             | 97.5  |
| 1998–2002 | 27.4            | 25.9             | 95.9  | 19.0            | 38.1             | 83.7  | 10.8            | 11.2             | 96.2  | 8.8             | 17.5             | 83.2  |
| 2003–2007 | 29.8            | 29.8             | 96.0  | 25.0            | 37.8             | 88.0  | 15.6            | 16.1             | 123.6 | 12.8            | 18.9             | 101.8 |
| 2008–2012 | 29.4            | 34.2             | 105.0 | 25.4            | 32.0             | 80.9  | 14.6            | 17.3             | 121.1 | 16.4            | 19.1             | 107.5 |
|           | 35–44           |                  |       | >74 y/o         |                  |       | 35–44           |                  |       | >74 y/o         |                  |       |
| 1983–1987 | 24.2            | 23.1             | 72.7  | 6.6             | 75.3             | 96.2  | 12.2            | 11.4             | 96.4  | 8.4             | 62.2             | 107.7 |
| 1988–1992 | 17.4            | 17.8             | 75.1  | 8.2             | 65.1             | 101.0 | 7.6             | 7.8              | 80.8  | 9.8             | 46.8             | 97.8  |
| 1993–1997 | 16.8            | 20.3             | 83.0  | 10.8            | 65.4             | 125.6 | 6.2             | 7.6              | 89.2  | 9.0             | 32.1             | 93.3  |
| 1998–2002 | 22.2            | 27.8             | 78.9  | 9.0             | 42.8             | 81.3  | 6.0             | 8.2              | 79.5  | 12.8            | 34.3             | 110.3 |
| 2003–2007 | 32.4            | 35.5             | 88.5  | 12.0            | 38.4             | 85.3  | 11.2            | 13.0             | 103.3 | 14.0            | 27.9             | 124.4 |
| 2008–2012 | 37.4            | 35.6             | 95.8  | 14.6            | 33.6             | 80.9  | 15.2            | 15.1             | 111.7 | 10.4            | 16.4             | 85.4  |

Secondary Medical Zone ID: 098

|           | Male            |                  |       |                 |                  |       | Female          |                  |       |                 |                  |       |
|-----------|-----------------|------------------|-------|-----------------|------------------|-------|-----------------|------------------|-------|-----------------|------------------|-------|
|           | Suicide         |                  |       | Suicide         |                  |       | Suicide         |                  |       | Suicide         |                  |       |
|           | Num<br>per year | Rate<br>/100,000 | × 100 | Num<br>per year | Rate<br>/100,000 | × 100 | Num<br>per year | Rate<br>/100,000 | × 100 | Num<br>per year | Rate<br>/100,000 | × 100 |
|           |                 |                  |       |                 |                  |       |                 |                  |       |                 |                  |       |
|           | Total (>10 y/o) |                  |       | 45–54           |                  |       | Total (>10 y/o) |                  |       | 45–54           |                  |       |
| 1983–1987 | 50.4            | 30.1             | 88.8  | 13.4            | 44.9             | 88.8  | 26.2            | 14.7             | 96.2  | 4.8             | 17.8             | 103.3 |
| 1988–1992 | 48.8            | 22.6             | 89.1  | 13.0            | 30.9             | 89.8  | 30.0            | 12.8             | 99.8  | 5.8             | 15.0             | 102.9 |
| 1993–1997 | 54.6            | 20.7             | 79.6  | 15.2            | 28.9             | 78.9  | 26.0            | 9.4              | 84.8  | 5.4             | 11.1             | 86.0  |
| 1998–2002 | 101.4           | 32.4             | 89.7  | 25.8            | 46.5             | 83.0  | 38.4            | 11.9             | 93.5  | 7.2             | 13.4             | 89.1  |
| 2003–2007 | 99.0            | 31.8             | 82.5  | 22.2            | 46.2             | 82.6  | 42.0            | 12.6             | 97.7  | 4.4             | 10.2             | 74.5  |
| 2008–2012 | 109.0           | 32.7             | 94.2  | 17.4            | 41.7             | 85.8  | 41.0            | 11.9             | 92.2  | 6.0             | 14.2             | 95.1  |
|           | 15–24           |                  |       | 55–64           |                  |       | 15–24           |                  |       | 55–64           |                  |       |
| 1983–1987 | 5.6             | 17.5             | 125.2 | 5.8             | 34.9             | 82.2  | 1.4             | 5.7              | 82.8  | 4.6             | 22.2             | 112.6 |
| 1988–1992 | 4.2             | 9.7              | 97.7  | 8.2             | 32.6             | 91.7  | 2.2             | 5.2              | 99.1  | 4.6             | 18.3             | 102.3 |
| 1993–1997 | 7.8             | 14.3             | 126.0 | 9.8             | 30.4             | 75.6  | 2.6             | 5.3              | 101.2 | 2.0             | 9.0              | 56.9  |
| 1998–2002 | 9.4             | 18.7             | 118.7 | 27.0            | 59.8             | 94.2  | 2.2             | 5.5              | 77.9  | 6.6             | 16.7             | 88.9  |
| 2003–2007 | 8.8             | 19.8             | 113.2 | 22.4            | 42.0             | 72.8  | 3.2             | 8.0              | 89.4  | 8.0             | 15.5             | 92.6  |
| 2008–2012 | 7.4             | 20.1             | 94.6  | 26.2            | 46.3             | 95.2  | 2.8             | 8.3              | 85.6  | 7.8             | 13.9             | 93.4  |
|           | 25–34           |                  |       | 65–74           |                  |       | 25–34           |                  |       | 65–74           |                  |       |
| 1983–1987 | 6.0             | 21.7             | 84.7  | 2.8             | 33.0             | 75.3  | 1.6             | 7.1              | 66.2  | 3.6             | 28.1             | 89.8  |
| 1988–1992 | 5.8             | 18.5             | 96.6  | 4.8             | 36.2             | 102.7 | 3.8             | 10.7             | 123.7 | 4.4             | 25.5             | 97.6  |
| 1993–1997 | 4.0             | 12.2             | 62.2  | 5.4             | 30.0             | 94.1  | 1.4             | 5.2              | 62.7  | 5.2             | 22.9             | 117.4 |
| 1998–2002 | 9.4             | 21.7             | 80.5  | 9.0             | 38.5             | 84.6  | 5.0             | 11.3             | 97.3  | 5.6             | 21.3             | 101.5 |
| 2003–2007 | 16.4            | 34.2             | 110.2 | 7.0             | 24.9             | 58.1  | 7.2             | 15.0             | 115.0 | 6.2             | 19.2             | 103.1 |
| 2008–2012 | 15.2            | 34.7             | 106.5 | 15.0            | 36.2             | 91.8  | 4.4             | 11.5             | 80.6  | 5.6             | 14.9             | 83.5  |
|           | 35–44           |                  |       | >74 y/o         |                  |       | 35–44           |                  |       | >74 y/o         |                  |       |
| 1983–1987 | 12.0            | 27.5             | 86.4  | 4.8             | 91.9             | 117.3 | 5.4             | 12.2             | 103.6 | 4.8             | 61.3             | 106.3 |
| 1988–1992 | 8.4             | 18.0             | 75.8  | 4.4             | 62.4             | 96.8  | 3.6             | 8.0              | 83.0  | 5.2             | 43.6             | 91.2  |
| 1993–1997 | 7.4             | 17.0             | 69.4  | 5.0             | 54.4             | 104.4 | 3.6             | 7.9              | 92.4  | 5.4             | 33.2             | 96.3  |
| 1998–2002 | 12.4            | 29.6             | 84.1  | 8.0             | 63.9             | 121.2 | 4.2             | 9.9              | 95.5  | 7.6             | 34.8             | 112.0 |
| 2003–2007 | 15.8            | 36.0             | 89.9  | 6.0             | 38.0             | 84.4  | 7.2             | 15.5             | 122.6 | 5.6             | 20.5             | 91.5  |
| 2008–2012 | 18.2            | 35.6             | 95.7  | 9.4             | 42.6             | 102.7 | 5.8             | 12.5             | 91.9  | 7.8             | 22.3             | 116.0 |

Secondary Medical Zone ID: 099

|           | Male            |          |       |          |          |       | Female          |          |       |          |          |       |
|-----------|-----------------|----------|-------|----------|----------|-------|-----------------|----------|-------|----------|----------|-------|
|           | Suicide         |          |       | Suicide  |          |       | Suicide         |          |       | Suicide  |          |       |
|           | Num             | Rate     | × 100 | Num      | Rate     | × 100 | Num             | Rate     | × 100 | Num      | Rate     | × 100 |
|           | per year        | /100,000 |       | per year | /100,000 |       | per year        | /100,000 |       | per year | /100,000 |       |
|           | Total (>10 y/o) |          |       | 45–54    |          |       | Total (>10 y/o) |          |       | 45–54    |          |       |
| 1983–1987 | 47.4            | 33.8     | 103.4 | 13.6     | 58.7     | 116.0 | 23.6            | 14.7     | 93.3  | 3.2      | 15.1     | 87.8  |
| 1988–1992 | 36.8            | 24.8     | 100.0 | 6.0      | 28.9     | 84.1  | 24.8            | 13.0     | 104.1 | 4.6      | 17.9     | 122.4 |
| 1993–1997 | 35.6            | 23.8     | 91.8  | 8.0      | 33.1     | 90.6  | 23.0            | 11.7     | 109.3 | 3.4      | 13.7     | 105.7 |
| 1998–2002 | 52.8            | 34.7     | 93.3  | 15.2     | 57.0     | 101.8 | 17.8            | 10.9     | 79.3  | 2.4      | 12.1     | 80.5  |
| 2003–2007 | 61.0            | 38.6     | 107.7 | 11.4     | 50.0     | 89.4  | 24.2            | 13.3     | 108.0 | 2.8      | 13.2     | 96.6  |
| 2008–2012 | 49.6            | 34.0     | 98.0  | 8.8      | 45.5     | 93.7  | 22.4            | 13.0     | 105.5 | 2.4      | 13.7     | 92.1  |
|           | 15–24           |          |       | 55–64    |          |       | 15–24           |          |       | 55–64    |          |       |
| 1983–1987 | 4.2             | 18.9     | 135.7 | 6.0      | 34.7     | 81.7  | 2.0             | 8.6      | 125.4 | 5.2      | 22.1     | 112.0 |
| 1988–1992 | 3.0             | 12.5     | 126.2 | 6.2      | 30.5     | 85.9  | 1.0             | 5.2      | 98.0  | 2.8      | 14.1     | 78.8  |
| 1993–1997 | 2.4             | 11.8     | 104.5 | 8.0      | 38.4     | 95.4  | 0.8             | 4.7      | 90.6  | 4.2      | 17.6     | 110.7 |
| 1998–2002 | 1.8             | 13.0     | 82.0  | 10.8     | 54.1     | 85.1  | 1.0             | 6.6      | 93.4  | 3.6      | 17.5     | 93.1  |
| 2003–2007 | 2.4             | 16.5     | 94.3  | 14.4     | 60.3     | 104.4 | 1.8             | 10.6     | 117.5 | 5.4      | 20.2     | 120.7 |
| 2008–2012 | 3.0             | 21.9     | 103.2 | 13.0     | 49.8     | 102.6 | 1.8             | 11.8     | 122.0 | 4.4      | 16.6     | 111.2 |
|           | 25–34           |          |       | 65–74    |          |       | 25–34           |          |       | 65–74    |          |       |
| 1983–1987 | 6.8             | 28.1     | 110.0 | 4.0      | 37.9     | 86.6  | 3.4             | 13.6     | 126.7 | 3.2      | 23.5     | 75.3  |
| 1988–1992 | 5.4             | 24.4     | 127.6 | 5.4      | 40.2     | 114.1 | 1.6             | 8.5      | 97.8  | 4.6      | 25.8     | 99.0  |
| 1993–1997 | 5.2             | 24.5     | 125.3 | 3.2      | 23.1     | 72.4  | 2.0             | 9.6      | 115.6 | 4.6      | 21.4     | 110.0 |
| 1998–2002 | 5.0             | 26.6     | 98.5  | 6.8      | 39.7     | 87.2  | 1.4             | 9.8      | 84.8  | 2.6      | 14.5     | 68.9  |
| 2003–2007 | 5.8             | 32.1     | 103.5 | 9.6      | 50.2     | 117.0 | 2.6             | 14.4     | 110.8 | 3.4      | 16.8     | 90.4  |
| 2008–2012 | 4.6             | 31.1     | 95.6  | 7.4      | 40.4     | 102.3 | 1.8             | 13.9     | 97.1  | 5.4      | 22.8     | 128.1 |
|           | 35–44           |          |       | >74 y/o  |          |       | 35–44           |          |       | >74 y/o  |          |       |
| 1983–1987 | 8.4             | 32.8     | 103.2 | 4.2      | 71.9     | 91.8  | 3.8             | 14.0     | 118.9 | 2.4      | 28.4     | 49.2  |
| 1988–1992 | 7.8             | 27.7     | 116.8 | 2.8      | 43.3     | 67.1  | 2.2             | 9.3      | 95.8  | 7.8      | 57.0     | 119.1 |
| 1993–1997 | 5.2             | 22.3     | 90.9  | 3.4      | 41.5     | 79.6  | 2.8             | 10.8     | 126.9 | 5.0      | 31.6     | 91.7  |
| 1998–2002 | 8.6             | 39.9     | 113.4 | 4.4      | 44.4     | 84.3  | 1.8             | 9.7      | 94.1  | 5.0      | 26.2     | 84.5  |
| 2003–2007 | 10.6            | 53.1     | 132.4 | 6.8      | 49.3     | 109.5 | 2.2             | 12.6     | 99.4  | 6.0      | 24.6     | 109.5 |
| 2008–2012 | 6.8             | 37.2     | 100.0 | 6.0      | 38.8     | 93.6  | 1.0             | 10.1     | 74.5  | 5.6      | 20.2     | 105.0 |

Secondary Medical Zone ID: 100

|           | Male            |                  |       |                 |                  |       | Female          |                  |       |                 |                  |       |
|-----------|-----------------|------------------|-------|-----------------|------------------|-------|-----------------|------------------|-------|-----------------|------------------|-------|
|           | Suicide         |                  |       | Suicide         |                  |       | Suicide         |                  |       | Suicide         |                  |       |
|           | Num<br>per year | Rate<br>/100,000 | × 100 | Num<br>per year | Rate<br>/100,000 | × 100 | Num<br>per year | Rate<br>/100,000 | × 100 | Num<br>per year | Rate<br>/100,000 | × 100 |
|           |                 |                  |       |                 |                  |       |                 |                  |       |                 |                  |       |
|           | Total (>10 y/o) |                  |       | 45–54           |                  |       | Total (>10 y/o) |                  |       | 45–54           |                  |       |
| 1983–1987 | 44.8            | 28.4             | 82.9  | 8.8             | 37.1             | 73.4  | 28.4            | 14.5             | 93.6  | 3.2             | 14.1             | 82.0  |
| 1988–1992 | 42.0            | 23.0             | 90.5  | 9.6             | 34.0             | 99.0  | 26.4            | 11.7             | 90.8  | 3.4             | 13.4             | 91.3  |
| 1993–1997 | 56.2            | 26.3             | 105.0 | 14.2            | 39.5             | 107.8 | 20.8            | 9.2              | 78.8  | 4.6             | 13.6             | 105.0 |
| 1998–2002 | 78.0            | 34.6             | 95.6  | 20.2            | 53.6             | 95.7  | 30.4            | 11.8             | 92.6  | 4.2             | 13.0             | 86.1  |
| 2003–2007 | 92.4            | 39.3             | 109.8 | 18.2            | 54.2             | 96.9  | 29.8            | 12.9             | 94.4  | 3.8             | 12.5             | 91.3  |
| 2008–2012 | 84.2            | 37.7             | 108.3 | 17.2            | 57.5             | 118.4 | 29.6            | 12.3             | 96.0  | 4.4             | 15.3             | 102.8 |
|           | 15–24           |                  |       | 55–64           |                  |       | 15–24           |                  |       | 55–64           |                  |       |
| 1983–1987 | 3.8             | 15.4             | 110.8 | 7.2             | 34.5             | 81.2  | 1.2             | 6.1              | 89.8  | 5.0             | 19.1             | 96.9  |
| 1988–1992 | 3.0             | 10.4             | 104.9 | 9.0             | 34.8             | 98.0  | 0.4             | 3.3              | 61.8  | 5.4             | 18.6             | 104.2 |
| 1993–1997 | 3.4             | 11.3             | 99.9  | 10.6            | 39.2             | 97.3  | 1.8             | 6.0              | 114.4 | 3.2             | 12.5             | 78.6  |
| 1998–2002 | 4.4             | 15.4             | 97.4  | 18.0            | 60.0             | 94.4  | 1.4             | 6.1              | 87.1  | 6.2             | 19.6             | 104.3 |
| 2003–2007 | 4.8             | 17.7             | 101.2 | 23.8            | 64.4             | 111.6 | 2.8             | 10.7             | 119.2 | 3.6             | 12.4             | 74.3  |
| 2008–2012 | 6.0             | 24.3             | 114.5 | 16.8            | 44.1             | 90.7  | 1.0             | 6.8              | 70.2  | 4.8             | 13.5             | 90.6  |
|           | 25–34           |                  |       | 65–74           |                  |       | 25–34           |                  |       | 65–74           |                  |       |
| 1983–1987 | 7.0             | 26.8             | 105.0 | 5.6             | 40.1             | 91.6  | 3.6             | 13.3             | 123.6 | 6.6             | 33.8             | 108.1 |
| 1988–1992 | 4.6             | 19.3             | 100.8 | 4.6             | 29.2             | 83.0  | 2.0             | 8.7              | 100.4 | 5.0             | 22.9             | 87.6  |
| 1993–1997 | 6.0             | 22.6             | 115.8 | 5.2             | 25.9             | 81.3  | 1.0             | 6.0              | 72.1  | 4.2             | 16.5             | 84.6  |
| 1998–2002 | 8.0             | 28.9             | 106.8 | 10.2            | 42.0             | 92.4  | 1.8             | 9.0              | 77.9  | 5.6             | 19.7             | 93.7  |
| 2003–2007 | 9.0             | 33.5             | 108.2 | 12.0            | 44.6             | 104.0 | 3.4             | 13.6             | 104.7 | 5.2             | 17.9             | 96.1  |
| 2008–2012 | 8.4             | 35.7             | 109.5 | 12.8            | 42.6             | 107.9 | 2.0             | 11.7             | 81.9  | 5.4             | 17.6             | 99.0  |
|           | 35–44           |                  |       | >74 y/o         |                  |       | 35–44           |                  |       | >74 y/o         |                  |       |
| 1983–1987 | 8.6             | 28.1             | 88.3  | 3.6             | 51.7             | 66.0  | 2.4             | 9.6              | 81.1  | 6.4             | 51.4             | 89.1  |
| 1988–1992 | 6.8             | 20.5             | 86.6  | 4.4             | 47.7             | 73.9  | 2.2             | 8.0              | 82.8  | 8.0             | 47.8             | 100.0 |
| 1993–1997 | 10.0            | 29.4             | 119.7 | 6.8             | 55.4             | 106.4 | 1.4             | 6.0              | 70.0  | 4.6             | 23.2             | 67.4  |
| 1998–2002 | 10.0            | 34.4             | 97.7  | 7.0             | 47.9             | 90.9  | 3.4             | 11.3             | 109.6 | 7.6             | 29.0             | 93.5  |
| 2003–2007 | 14.0            | 49.4             | 123.2 | 10.4            | 52.8             | 117.3 | 5.2             | 16.7             | 132.0 | 5.6             | 17.7             | 79.0  |
| 2008–2012 | 13.2            | 44.1             | 118.5 | 9.4             | 41.1             | 99.1  | 4.6             | 15.7             | 115.9 | 7.2             | 19.3             | 100.3 |

Secondary Medical Zone ID: 101

|                 | Male            |                  |       |                 |                  |       | Female          |                  |       |                 |                  |       |
|-----------------|-----------------|------------------|-------|-----------------|------------------|-------|-----------------|------------------|-------|-----------------|------------------|-------|
|                 | Suicide         |                  |       | Suicide         |                  |       | Suicide         |                  |       | Suicide         |                  |       |
|                 | Num<br>per year | Rate<br>/100,000 | × 100 | Num<br>per year | Rate<br>/100,000 | × 100 | Num<br>per year | Rate<br>/100,000 | × 100 | Num<br>per year | Rate<br>/100,000 | × 100 |
|                 |                 |                  |       |                 |                  |       |                 |                  |       |                 |                  |       |
| Total (>10 y/o) | 45–54           | Total (>10 y/o)  | 45–54 |                 |                  |       |                 |                  |       |                 |                  |       |
| 1983–1987       | 25.8            | 34.7             | 110.2 | 4.6             | 45.1             | 89.3  | 17.2            | 17.1             | 117.3 | 3.6             | 23.6             | 137.2 |
| 1988–1992       | 19.8            | 25.5             | 106.3 | 6.2             | 48.9             | 142.4 | 15.8            | 14.0             | 118.2 | 2.0             | 15.9             | 108.5 |
| 1993–1997       | 21.4            | 26.5             | 110.7 | 5.0             | 39.9             | 109.0 | 11.2            | 11.1             | 102.4 | 2.2             | 15.1             | 117.0 |
| 1998–2002       | 28.4            | 37.4             | 104.8 | 6.8             | 57.9             | 103.5 | 9.2             | 11.7             | 83.2  | 2.2             | 16.7             | 110.7 |
| 2003–2007       | 24.0            | 35.7             | 93.6  | 5.0             | 54.1             | 96.8  | 8.4             | 11.8             | 85.6  | 0.8             | 12.0             | 87.8  |
| 2008–2012       | 20.0            | 33.2             | 90.0  | 4.2             | 52.0             | 106.9 | 9.8             | 13.0             | 98.2  | 1.4             | 16.2             | 108.4 |
|                 | 15–24           |                  |       | 55–64           |                  |       | 15–24           |                  |       | 55–64           |                  |       |
| 1983–1987       | 1.6             | 17.3             | 123.7 | 6.2             | 53.7             | 126.4 | 1.0             | 8.5              | 124.2 | 2.2             | 18.8             | 95.2  |
| 1988–1992       | 1.4             | 12.0             | 120.8 | 2.6             | 27.9             | 78.5  | 0.4             | 5.2              | 98.7  | 4.0             | 25.0             | 139.9 |
| 1993–1997       | 1.2             | 12.6             | 111.0 | 5.0             | 44.6             | 110.9 | 0.2             | 4.6              | 87.3  | 2.0             | 16.7             | 105.0 |
| 1998–2002       | 2.0             | 20.4             | 128.8 | 8.0             | 71.9             | 113.2 | 0.0             | 5.4              | 77.3  | 1.2             | 15.6             | 82.9  |
| 2003–2007       | 1.8             | 21.9             | 125.4 | 4.8             | 46.2             | 80.0  | 0.6             | 9.7              | 107.5 | 1.2             | 14.1             | 84.5  |
| 2008–2012       | 1.0             | 21.7             | 102.5 | 3.8             | 39.3             | 80.9  | 0.6             | 10.7             | 109.8 | 1.4             | 13.7             | 92.0  |
|                 | 25–34           |                  |       | 65–74           |                  |       | 25–34           |                  |       | 65–74           |                  |       |
| 1983–1987       | 2.8             | 29.0             | 113.3 | 3.6             | 48.5             | 110.7 | 2.0             | 15.2             | 141.1 | 3.4             | 33.8             | 108.3 |
| 1988–1992       | 0.8             | 15.4             | 80.4  | 2.2             | 30.9             | 87.6  | 1.0             | 10.1             | 116.5 | 2.6             | 24.8             | 95.2  |
| 1993–1997       | 2.0             | 23.3             | 119.1 | 3.4             | 35.4             | 111.1 | 1.4             | 11.4             | 137.0 | 2.4             | 20.2             | 103.7 |
| 1998–2002       | 1.6             | 25.2             | 93.3  | 4.0             | 42.6             | 93.6  | 0.6             | 10.8             | 93.5  | 1.8             | 17.9             | 85.2  |
| 2003–2007       | 2.8             | 34.9             | 112.4 | 4.2             | 43.0             | 100.1 | 0.8             | 12.7             | 97.7  | 2.0             | 18.3             | 98.2  |
| 2008–2012       | 1.4             | 29.8             | 91.5  | 5.0             | 45.0             | 113.9 | 1.0             | 15.1             | 105.3 | 1.8             | 17.2             | 96.8  |
|                 | 35–44           |                  |       | >74 y/o         |                  |       | 35–44           |                  |       | >74 y/o         |                  |       |
| 1983–1987       | 3.2             | 28.6             | 89.7  | 3.8             | 89.5             | 114.3 | 1.2             | 11.1             | 94.3  | 3.8             | 58.8             | 101.9 |
| 1988–1992       | 1.6             | 18.0             | 76.1  | 4.6             | 84.3             | 130.7 | 0.8             | 8.8              | 90.9  | 5.0             | 57.5             | 120.1 |
| 1993–1997       | 2.4             | 25.0             | 102.1 | 2.4             | 44.8             | 86.0  | 0.4             | 7.1              | 82.9  | 2.6             | 27.5             | 79.9  |
| 1998–2002       | 3.6             | 41.2             | 117.1 | 2.4             | 40.8             | 77.4  | 1.0             | 11.2             | 108.4 | 2.4             | 21.9             | 70.6  |
| 2003–2007       | 2.6             | 37.9             | 94.7  | 2.8             | 37.5             | 83.2  | 1.0             | 13.1             | 103.5 | 2.0             | 15.9             | 70.7  |
| 2008–2012       | 1.8             | 32.0             | 85.9  | 2.4             | 31.3             | 75.4  | 0.8             | 12.9             | 95.1  | 2.8             | 18.2             | 94.9  |

Secondary Medical Zone ID: 102

|                 | Male            |                  |       |                 |                  |       | Female          |                  |       |                 |                  |       |
|-----------------|-----------------|------------------|-------|-----------------|------------------|-------|-----------------|------------------|-------|-----------------|------------------|-------|
|                 | Suicide         |                  |       | Suicide         |                  |       | Suicide         |                  |       | Suicide         |                  |       |
|                 | Num<br>per year | Rate<br>/100,000 | × 100 | Num<br>per year | Rate<br>/100,000 | × 100 | Num<br>per year | Rate<br>/100,000 | × 100 | Num<br>per year | Rate<br>/100,000 | × 100 |
|                 |                 |                  |       |                 |                  |       |                 |                  |       |                 |                  |       |
| Total (>10 y/o) | 45–54           | Total (>10 y/o)  | 45–54 |                 |                  |       |                 |                  |       |                 |                  |       |
| 1983–1987       | 40.0            | 32.3             | 99.3  | 10.0            | 48.2             | 95.3  | 22.6            | 16.4             | 111.2 | 3.6             | 18.2             | 105.6 |
| 1988–1992       | 36.2            | 25.4             | 105.8 | 9.2             | 36.3             | 105.7 | 22.2            | 13.8             | 112.9 | 2.8             | 13.4             | 91.5  |
| 1993–1997       | 42.2            | 26.6             | 109.0 | 11.8            | 40.5             | 110.7 | 21.2            | 11.8             | 115.5 | 4.4             | 15.1             | 116.6 |
| 1998–2002       | 64.4            | 38.9             | 110.3 | 17.8            | 63.6             | 113.7 | 26.0            | 14.2             | 115.9 | 4.4             | 16.2             | 107.5 |
| 2003–2007       | 67.4            | 40.4             | 113.8 | 16.0            | 66.5             | 118.9 | 21.0            | 12.5             | 99.5  | 2.8             | 13.3             | 97.0  |
| 2008–2012       | 54.6            | 33.7             | 98.2  | 9.8             | 47.5             | 97.8  | 18.4            | 12.0             | 90.3  | 2.2             | 13.2             | 88.7  |
|                 | 15–24           |                  |       | 55–64           |                  |       | 15–24           |                  |       | 55–64           |                  |       |
| 1983–1987       | 3.4             | 16.2             | 115.8 | 4.0             | 33.6             | 79.1  | 2.0             | 8.5              | 123.9 | 3.4             | 21.6             | 109.6 |
| 1988–1992       | 2.4             | 9.9              | 100.3 | 7.8             | 42.1             | 118.6 | 2.8             | 8.9              | 169.3 | 2.8             | 16.9             | 94.7  |
| 1993–1997       | 1.2             | 7.7              | 68.4  | 9.8             | 46.1             | 114.5 | 2.2             | 7.6              | 144.9 | 3.2             | 16.3             | 102.7 |
| 1998–2002       | 3.6             | 16.6             | 105.4 | 19.6            | 79.9             | 125.7 | 1.6             | 7.7              | 109.0 | 5.2             | 21.3             | 113.4 |
| 2003–2007       | 3.8             | 19.4             | 111.4 | 15.6            | 59.0             | 102.2 | 1.0             | 7.5              | 82.9  | 4.8             | 17.8             | 106.3 |
| 2008–2012       | 4.8             | 25.3             | 119.4 | 11.0            | 43.1             | 88.7  | 0.8             | 7.5              | 77.6  | 3.2             | 13.5             | 90.7  |
|                 | 25–34           |                  |       | 65–74           |                  |       | 25–34           |                  |       | 65–74           |                  |       |
| 1983–1987       | 4.8             | 22.8             | 89.3  | 3.6             | 47.1             | 107.5 | 2.0             | 10.3             | 95.7  | 3.6             | 33.6             | 107.5 |
| 1988–1992       | 5.0             | 23.1             | 120.8 | 3.4             | 36.9             | 104.9 | 2.8             | 11.9             | 137.3 | 3.8             | 29.8             | 114.2 |
| 1993–1997       | 4.4             | 20.5             | 105.1 | 5.2             | 39.8             | 124.9 | 0.8             | 6.3              | 75.3  | 4.4             | 27.0             | 138.6 |
| 1998–2002       | 5.2             | 24.2             | 89.8  | 5.0             | 36.9             | 81.2  | 3.8             | 15.0             | 129.5 | 2.2             | 16.1             | 76.6  |
| 2003–2007       | 8.6             | 36.7             | 118.3 | 8.0             | 44.9             | 104.6 | 2.4             | 12.6             | 96.7  | 1.8             | 13.2             | 71.1  |
| 2008–2012       | 5.2             | 29.0             | 88.9  | 7.8             | 38.0             | 96.2  | 1.4             | 11.3             | 78.8  | 3.8             | 17.8             | 100.1 |
|                 | 35–44           |                  |       | >74 y/o         |                  |       | 35–44           |                  |       | >74 y/o         |                  |       |
| 1983–1987       | 11.0            | 37.8             | 118.6 | 3.2             | 76.4             | 97.5  | 3.6             | 12.8             | 108.2 | 4.4             | 65.5             | 113.5 |
| 1988–1992       | 4.8             | 19.0             | 80.3  | 3.2             | 62.0             | 96.1  | 2.0             | 8.6              | 89.1  | 5.2             | 55.9             | 116.9 |
| 1993–1997       | 6.4             | 26.2             | 106.8 | 3.4             | 54.6             | 104.8 | 1.6             | 7.8              | 91.8  | 4.2             | 36.8             | 106.8 |
| 1998–2002       | 10.4            | 46.3             | 131.4 | 2.4             | 37.3             | 70.7  | 3.2             | 13.7             | 132.2 | 5.4             | 37.1             | 119.4 |
| 2003–2007       | 9.4             | 44.2             | 110.3 | 6.0             | 54.4             | 120.7 | 3.2             | 14.7             | 116.1 | 5.0             | 27.5             | 122.5 |
| 2008–2012       | 8.4             | 35.9             | 96.6  | 7.6             | 53.4             | 128.8 | 3.4             | 14.8             | 109.4 | 3.4             | 17.0             | 88.6  |

Secondary Medical Zone ID: 103

|           | Male            |                  |       |                 |                  |       | Female          |                  |       |                 |                  |       |
|-----------|-----------------|------------------|-------|-----------------|------------------|-------|-----------------|------------------|-------|-----------------|------------------|-------|
|           | Suicide         |                  |       | Suicide         |                  |       | Suicide         |                  |       | Suicide         |                  |       |
|           | Num<br>per year | Rate<br>/100,000 | × 100 | Num<br>per year | Rate<br>/100,000 | × 100 | Num<br>per year | Rate<br>/100,000 | × 100 | Num<br>per year | Rate<br>/100,000 | × 100 |
|           |                 |                  |       |                 |                  |       |                 |                  |       |                 |                  |       |
|           | Total (>10 y/o) |                  |       | 45–54           |                  |       | Total (>10 y/o) |                  |       | 45–54           |                  |       |
| 1983–1987 | 28.6            | 31.0             | 93.6  | 8.4             | 50.9             | 100.6 | 14.4            | 15.9             | 103.9 | 1.6             | 14.4             | 83.8  |
| 1988–1992 | 28.4            | 25.5             | 105.1 | 7.0             | 33.8             | 98.4  | 12.2            | 12.0             | 91.7  | 2.4             | 14.0             | 95.8  |
| 1993–1997 | 25.2            | 21.6             | 81.7  | 7.6             | 32.7             | 89.4  | 11.8            | 10.1             | 91.0  | 2.0             | 10.9             | 84.3  |
| 1998–2002 | 48.4            | 35.0             | 98.0  | 13.0            | 54.4             | 97.1  | 13.0            | 11.2             | 82.3  | 3.8             | 16.3             | 108.0 |
| 2003–2007 | 43.8            | 32.8             | 86.6  | 9.2             | 46.1             | 82.5  | 16.6            | 11.8             | 97.7  | 2.2             | 12.7             | 92.5  |
| 2008–2012 | 48.4            | 34.7             | 101.5 | 8.6             | 48.9             | 100.6 | 18.8            | 13.3             | 105.8 | 2.0             | 13.6             | 91.4  |
|           | 15–24           |                  |       | 55–64           |                  |       | 15–24           |                  |       | 55–64           |                  |       |
| 1983–1987 | 2.8             | 15.8             | 113.4 | 4.2             | 44.2             | 104.1 | 1.0             | 6.7              | 98.8  | 1.8             | 19.6             | 99.1  |
| 1988–1992 | 3.0             | 12.1             | 121.9 | 4.6             | 36.0             | 101.3 | 0.4             | 3.8              | 71.7  | 2.4             | 19.0             | 106.5 |
| 1993–1997 | 3.0             | 12.2             | 108.3 | 5.2             | 34.5             | 85.8  | 1.2             | 5.6              | 107.0 | 1.4             | 12.6             | 79.0  |
| 1998–2002 | 2.8             | 14.8             | 94.0  | 12.4            | 62.3             | 98.1  | 1.6             | 8.0              | 113.3 | 1.8             | 14.3             | 76.1  |
| 2003–2007 | 2.4             | 15.7             | 89.8  | 13.2            | 57.2             | 99.1  | 0.8             | 7.1              | 78.4  | 4.2             | 18.2             | 108.8 |
| 2008–2012 | 3.2             | 21.3             | 100.5 | 10.8            | 47.1             | 96.9  | 1.2             | 9.3              | 96.4  | 2.4             | 13.0             | 87.0  |
|           | 25–34           |                  |       | 65–74           |                  |       | 25–34           |                  |       | 65–74           |                  |       |
| 1983–1987 | 3.4             | 20.2             | 78.9  | 1.2             | 35.2             | 80.3  | 1.8             | 10.9             | 100.8 | 2.0             | 32.2             | 102.9 |
| 1988–1992 | 4.2             | 22.2             | 116.4 | 0.8             | 23.7             | 67.1  | 0.4             | 5.8              | 67.3  | 2.6             | 31.1             | 119.2 |
| 1993–1997 | 2.4             | 14.8             | 75.7  | 1.8             | 25.7             | 80.6  | 1.8             | 9.4              | 112.9 | 1.4             | 16.9             | 86.9  |
| 1998–2002 | 5.8             | 27.0             | 99.9  | 5.8             | 49.7             | 109.4 | 1.0             | 8.6              | 74.4  | 2.4             | 21.0             | 99.8  |
| 2003–2007 | 5.6             | 28.5             | 91.9  | 4.0             | 32.4             | 75.6  | 1.2             | 9.8              | 75.6  | 2.6             | 18.7             | 100.5 |
| 2008–2012 | 4.8             | 29.6             | 90.9  | 6.0             | 35.7             | 90.4  | 2.0             | 13.9             | 96.7  | 3.2             | 18.3             | 103.1 |
|           | 35–44           |                  |       | >74 y/o         |                  |       | 35–44           |                  |       | >74 y/o         |                  |       |
| 1983–1987 | 7.0             | 30.3             | 95.1  | 1.6             | 72.9             | 93.1  | 2.6             | 11.9             | 100.6 | 3.6             | 84.1             | 145.8 |
| 1988–1992 | 4.8             | 21.2             | 89.5  | 4.0             | 102.0            | 158.1 | 1.6             | 8.5              | 88.3  | 2.4             | 46.3             | 96.8  |
| 1993–1997 | 3.4             | 18.2             | 74.3  | 1.6             | 46.0             | 88.4  | 1.0             | 6.8              | 79.8  | 2.8             | 39.7             | 115.4 |
| 1998–2002 | 5.6             | 31.6             | 89.6  | 3.0             | 57.0             | 108.0 | 0.8             | 7.5              | 73.0  | 1.6             | 21.6             | 69.7  |
| 2003–2007 | 6.6             | 36.2             | 90.3  | 2.8             | 41.5             | 92.1  | 1.6             | 11.1             | 88.2  | 4.0             | 32.1             | 143.1 |
| 2008–2012 | 9.8             | 43.3             | 116.5 | 5.2             | 50.9             | 122.7 | 3.6             | 16.4             | 121.2 | 4.2             | 26.4             | 137.2 |



Secondary Medical Zone ID: 104

|                 | Male            |                  |       |                 |                  |       | Female          |                  |       |                 |                  |       |
|-----------------|-----------------|------------------|-------|-----------------|------------------|-------|-----------------|------------------|-------|-----------------|------------------|-------|
|                 | Suicide         |                  |       | Suicide         |                  |       | Suicide         |                  |       | Suicide         |                  |       |
|                 | Num<br>per year | Rate<br>/100,000 | × 100 | Num<br>per year | Rate<br>/100,000 | × 100 | Num<br>per year | Rate<br>/100,000 | × 100 | Num<br>per year | Rate<br>/100,000 | × 100 |
|                 |                 |                  |       |                 |                  |       |                 |                  |       |                 |                  |       |
| Total (>10 y/o) | 45–54           | Total (>10 y/o)  | 45–54 |                 |                  |       |                 |                  |       |                 |                  |       |
| 1983–1987       | 79.0            | 27.8             | 82.8  | 20.2            | 45.4             | 89.8  | 50.6            | 14.9             | 94.6  | 8.6             | 17.3             | 100.5 |
| 1988–1992       | 62.2            | 23.1             | 91.4  | 12.8            | 30.3             | 88.1  | 42.4            | 12.9             | 97.6  | 5.4             | 12.6             | 86.4  |
| 1993–1997       | 68.6            | 25.1             | 99.2  | 17.6            | 38.6             | 105.6 | 35.4            | 11.2             | 97.5  | 6.0             | 13.1             | 101.6 |
| 1998–2002       | 108.6           | 36.0             | 102.1 | 25.2            | 57.0             | 101.8 | 51.0            | 15.0             | 114.6 | 9.0             | 19.1             | 127.2 |
| 2003–2007       | 110.6           | 34.0             | 93.2  | 19.8            | 47.4             | 84.7  | 59.0            | 15.9             | 125.3 | 6.0             | 14.5             | 105.5 |
| 2008–2012       | 113.2           | 32.6             | 95.0  | 16.8            | 36.7             | 75.4  | 56.2            | 14.7             | 111.8 | 9.6             | 19.4             | 129.8 |
|                 | 15–24           |                  |       | 55–64           |                  |       | 15–24           |                  |       | 55–64           |                  |       |
| 1983–1987       | 5.8             | 10.7             | 76.5  | 13.0            | 39.5             | 92.9  | 4.0             | 7.4              | 108.7 | 6.4             | 15.8             | 80.2  |
| 1988–1992       | 5.6             | 10.9             | 109.7 | 10.2            | 29.7             | 83.5  | 4.4             | 8.1              | 153.8 | 7.6             | 18.3             | 102.4 |
| 1993–1997       | 5.0             | 11.7             | 103.2 | 18.2            | 47.8             | 118.7 | 2.2             | 5.5              | 104.6 | 5.0             | 13.1             | 82.4  |
| 1998–2002       | 6.0             | 16.3             | 103.3 | 28.2            | 69.9             | 110.1 | 4.0             | 10.0             | 141.7 | 7.0             | 17.3             | 92.0  |
| 2003–2007       | 5.2             | 16.2             | 92.9  | 32.2            | 69.5             | 120.4 | 6.6             | 17.2             | 190.8 | 8.0             | 17.3             | 103.5 |
| 2008–2012       | 5.6             | 19.4             | 91.7  | 24.6            | 53.7             | 110.6 | 3.6             | 11.5             | 118.9 | 9.4             | 19.4             | 130.2 |
|                 | 25–34           |                  |       | 65–74           |                  |       | 25–34           |                  |       | 65–74           |                  |       |
| 1983–1987       | 12.4            | 24.7             | 96.7  | 8.4             | 39.1             | 89.2  | 8.6             | 16.8             | 156.3 | 5.8             | 20.5             | 65.7  |
| 1988–1992       | 9.8             | 22.7             | 118.9 | 6.8             | 32.8             | 93.2  | 5.6             | 12.7             | 146.1 | 4.8             | 17.1             | 65.4  |
| 1993–1997       | 9.2             | 21.8             | 111.8 | 5.6             | 24.7             | 77.6  | 5.0             | 11.3             | 136.0 | 5.6             | 17.4             | 89.5  |
| 1998–2002       | 16.0            | 31.4             | 116.3 | 15.4            | 52.4             | 115.2 | 9.8             | 17.8             | 153.3 | 7.4             | 21.0             | 99.8  |
| 2003–2007       | 12.4            | 22.7             | 73.3  | 14.2            | 44.7             | 104.1 | 13.6            | 20.9             | 160.9 | 7.8             | 20.4             | 109.5 |
| 2008–2012       | 20.6            | 34.4             | 105.7 | 17.2            | 49.6             | 125.4 | 11.4            | 17.8             | 124.3 | 7.8             | 19.5             | 109.8 |
|                 | 35–44           |                  |       | >74 y/o         |                  |       | 35–44           |                  |       | >74 y/o         |                  |       |
| 1983–1987       | 14.4            | 27.2             | 85.5  | 4.8             | 41.2             | 52.6  | 10.0            | 16.4             | 139.2 | 7.0             | 36.7             | 63.6  |
| 1988–1992       | 11.0            | 24.6             | 103.8 | 5.6             | 42.3             | 65.5  | 6.0             | 12.2             | 126.5 | 8.6             | 38.2             | 79.9  |
| 1993–1997       | 8.8             | 24.5             | 99.9  | 4.0             | 29.9             | 57.5  | 5.4             | 12.9             | 151.7 | 6.2             | 24.5             | 71.2  |
| 1998–2002       | 11.6            | 29.7             | 84.3  | 6.2             | 38.4             | 72.9  | 7.0             | 15.4             | 149.4 | 6.8             | 22.6             | 72.7  |
| 2003–2007       | 20.2            | 38.1             | 95.1  | 6.4             | 32.5             | 72.1  | 9.6             | 16.6             | 131.1 | 7.4             | 20.2             | 90.0  |
| 2008–2012       | 20.4            | 32.2             | 86.4  | 7.8             | 33.1             | 79.8  | 8.4             | 12.6             | 92.8  | 5.8             | 14.4             | 74.9  |

Secondary Medical Zone ID: 105

|                 | Male            |                  |       |                 |                  |       | Female          |                  |       |                 |                  |       |
|-----------------|-----------------|------------------|-------|-----------------|------------------|-------|-----------------|------------------|-------|-----------------|------------------|-------|
|                 | Suicide         |                  |       | Suicide         |                  |       | Suicide         |                  |       | Suicide         |                  |       |
|                 | Num<br>per year | Rate<br>/100,000 | × 100 | Num<br>per year | Rate<br>/100,000 | × 100 | Num<br>per year | Rate<br>/100,000 | × 100 | Num<br>per year | Rate<br>/100,000 | × 100 |
|                 |                 |                  |       |                 |                  |       |                 |                  |       |                 |                  |       |
| Total (>10 y/o) | 45–54           | Total (>10 y/o)  | 45–54 |                 |                  |       |                 |                  |       |                 |                  |       |
| 1983–1987       | 112.6           | 27.0             | 80.7  | 24.6            | 38.5             | 76.1  | 66.6            | 14.6             | 95.9  | 13.0            | 18.4             | 106.6 |
| 1988–1992       | 89.4            | 20.6             | 82.0  | 22.2            | 31.0             | 90.4  | 53.8            | 11.4             | 87.3  | 8.8             | 12.9             | 87.9  |
| 1993–1997       | 113.0           | 24.3             | 97.2  | 28.6            | 36.1             | 98.6  | 53.2            | 10.9             | 96.7  | 10.6            | 14.0             | 108.7 |
| 1998–2002       | 158.2           | 32.6             | 90.8  | 38.6            | 51.8             | 92.5  | 58.4            | 12.2             | 88.7  | 9.6             | 14.2             | 94.5  |
| 2003–2007       | 151.8           | 30.1             | 82.8  | 24.0            | 37.4             | 66.9  | 66.2            | 13.2             | 99.8  | 8.8             | 14.5             | 105.9 |
| 2008–2012       | 152.4           | 30.1             | 87.0  | 28.6            | 42.4             | 87.3  | 69.6            | 13.4             | 101.1 | 11.6            | 18.3             | 122.6 |
|                 | 15–24           |                  |       | 55–64           |                  |       | 15–24           |                  |       | 55–64           |                  |       |
| 1983–1987       | 9.2             | 10.6             | 76.2  | 17.0            | 37.5             | 88.3  | 6.6             | 8.2              | 119.7 | 11.4            | 20.4             | 103.4 |
| 1988–1992       | 7.0             | 8.5              | 86.1  | 16.8            | 31.7             | 89.4  | 4.0             | 5.2              | 99.2  | 9.6             | 16.2             | 91.0  |
| 1993–1997       | 10.2            | 13.4             | 118.1 | 21.8            | 37.4             | 93.0  | 4.6             | 6.3              | 121.4 | 11.4            | 17.8             | 111.9 |
| 1998–2002       | 7.4             | 12.8             | 80.8  | 43.4            | 66.3             | 104.3 | 5.8             | 9.1              | 130.2 | 9.8             | 15.8             | 83.7  |
| 2003–2007       | 7.4             | 14.5             | 83.3  | 44.6            | 61.0             | 105.7 | 6.0             | 11.2             | 124.8 | 10.4            | 15.3             | 91.6  |
| 2008–2012       | 9.0             | 19.2             | 90.7  | 29.4            | 42.8             | 88.2  | 3.4             | 7.9              | 81.8  | 9.4             | 14.4             | 96.7  |
|                 | 25–34           |                  |       | 65–74           |                  |       | 25–34           |                  |       | 65–74           |                  |       |
| 1983–1987       | 16.8            | 19.6             | 76.5  | 9.8             | 37.2             | 85.0  | 4.0             | 6.3              | 58.6  | 9.8             | 28.3             | 90.4  |
| 1988–1992       | 10.8            | 13.7             | 71.8  | 6.6             | 24.0             | 68.0  | 7.0             | 9.8              | 113.6 | 8.8             | 22.3             | 85.4  |
| 1993–1997       | 14.6            | 17.8             | 91.2  | 13.0            | 35.6             | 111.5 | 8.8             | 11.4             | 137.3 | 7.2             | 15.9             | 81.7  |
| 1998–2002       | 20.0            | 22.9             | 84.7  | 17.8            | 42.4             | 93.2  | 8.6             | 10.9             | 93.7  | 7.6             | 15.5             | 73.7  |
| 2003–2007       | 19.6            | 22.2             | 71.5  | 18.4            | 39.5             | 92.0  | 13.0            | 15.1             | 116.2 | 8.0             | 15.1             | 81.0  |
| 2008–2012       | 22.4            | 27.1             | 83.3  | 23.6            | 44.6             | 112.8 | 12.0            | 15.0             | 104.9 | 10.8            | 18.2             | 102.3 |
|                 | 35–44           |                  |       | >74 y/o         |                  |       | 35–44           |                  |       | >74 y/o         |                  |       |
| 1983–1987       | 26.2            | 29.7             | 93.2  | 8.4             | 62.3             | 79.5  | 11.0            | 13.2             | 112.2 | 10.2            | 48.4             | 83.9  |
| 1988–1992       | 16.8            | 21.1             | 89.1  | 8.4             | 50.8             | 78.7  | 7.2             | 9.8              | 102.0 | 8.4             | 31.9             | 66.7  |
| 1993–1997       | 15.8            | 23.7             | 96.7  | 9.0             | 45.9             | 88.2  | 5.0             | 8.3              | 98.0  | 5.4             | 17.4             | 50.6  |
| 1998–2002       | 21.0            | 31.2             | 88.5  | 9.8             | 41.5             | 78.8  | 9.0             | 13.9             | 134.3 | 7.8             | 19.8             | 63.6  |
| 2003–2007       | 26.2            | 32.9             | 82.2  | 11.6            | 39.3             | 87.2  | 11.2            | 15.0             | 118.8 | 8.8             | 17.8             | 79.5  |
| 2008–2012       | 27.4            | 30.7             | 82.4  | 11.6            | 33.5             | 80.8  | 13.2            | 15.1             | 111.0 | 8.8             | 15.1             | 78.4  |

Secondary Medical Zone ID: 106

|                 | Male            |                  |       |                 |                  |       | Female          |                  |       |                 |                  |       |
|-----------------|-----------------|------------------|-------|-----------------|------------------|-------|-----------------|------------------|-------|-----------------|------------------|-------|
|                 | Suicide         |                  |       | Suicide         |                  |       | Suicide         |                  |       | Suicide         |                  |       |
|                 | Num<br>per year | Rate<br>/100,000 | × 100 | Num<br>per year | Rate<br>/100,000 | × 100 | Num<br>per year | Rate<br>/100,000 | × 100 | Num<br>per year | Rate<br>/100,000 | × 100 |
|                 |                 |                  |       |                 |                  |       |                 |                  |       |                 |                  |       |
| Total (>10 y/o) | 45–54           | Total (>10 y/o)  | 45–54 |                 |                  |       |                 |                  |       |                 |                  |       |
| 1983–1987       | 122.8           | 23.4             | 70.5  | 26.2            | 35.4             | 70.0  | 80.2            | 13.6             | 88.2  | 11.2            | 13.5             | 78.4  |
| 1988–1992       | 108.6           | 20.7             | 82.6  | 25.6            | 33.2             | 96.8  | 69.8            | 11.5             | 87.9  | 13.4            | 15.4             | 105.5 |
| 1993–1997       | 114.8           | 21.1             | 83.4  | 25.2            | 30.7             | 83.8  | 62.8            | 10.0             | 88.9  | 11.0            | 12.4             | 96.3  |
| 1998–2002       | 172.0           | 30.6             | 84.0  | 36.2            | 45.4             | 81.1  | 81.6            | 12.3             | 94.7  | 9.4             | 11.9             | 79.3  |
| 2003–2007       | 160.2           | 28.0             | 74.5  | 31.6            | 42.0             | 75.1  | 81.6            | 12.3             | 93.7  | 10.4            | 13.3             | 97.4  |
| 2008–2012       | 157.4           | 26.8             | 75.3  | 31.8            | 37.8             | 77.8  | 94.0            | 14.0             | 101.8 | 15.4            | 17.1             | 114.9 |
|                 | 15–24           |                  |       | 55–64           |                  |       | 15–24           |                  |       | 55–64           |                  |       |
| 1983–1987       | 19.0            | 13.5             | 96.8  | 16.0            | 30.4             | 71.6  | 8.2             | 7.1              | 104.4 | 14.0            | 20.3             | 102.8 |
| 1988–1992       | 11.0            | 9.1              | 92.1  | 16.0            | 26.8             | 75.5  | 5.6             | 5.1              | 97.2  | 12.0            | 16.7             | 93.4  |
| 1993–1997       | 11.8            | 11.5             | 101.3 | 23.0            | 35.9             | 89.3  | 6.2             | 6.1              | 116.6 | 10.0            | 13.7             | 86.4  |
| 1998–2002       | 12.4            | 14.5             | 91.5  | 38.6            | 57.3             | 90.2  | 9.4             | 10.3             | 146.2 | 13.6            | 18.0             | 95.5  |
| 2003–2007       | 11.8            | 16.6             | 95.2  | 34.6            | 47.2             | 81.8  | 6.8             | 9.6              | 106.2 | 12.6            | 15.8             | 94.1  |
| 2008–2012       | 9.8             | 16.7             | 78.9  | 31.4            | 43.3             | 89.1  | 9.0             | 13.6             | 140.6 | 15.0            | 18.2             | 122.0 |
|                 | 25–34           |                  |       | 65–74           |                  |       | 25–34           |                  |       | 65–74           |                  |       |
| 1983–1987       | 19.6            | 17.6             | 68.8  | 8.8             | 28.8             | 65.7  | 12.2            | 11.4             | 105.7 | 9.8             | 23.6             | 75.4  |
| 1988–1992       | 19.2            | 17.8             | 93.2  | 7.2             | 22.1             | 62.6  | 8.2             | 8.1              | 93.4  | 11.6            | 23.9             | 91.7  |
| 1993–1997       | 18.8            | 17.2             | 88.1  | 12.8            | 30.0             | 94.2  | 10.0            | 9.0              | 108.2 | 9.2             | 16.5             | 84.4  |
| 1998–2002       | 28.8            | 25.6             | 94.9  | 20.2            | 40.5             | 89.1  | 16.8            | 13.8             | 119.1 | 11.2            | 18.0             | 85.5  |
| 2003–2007       | 27.4            | 24.6             | 79.4  | 17.8            | 34.7             | 80.9  | 17.0            | 13.8             | 106.2 | 11.2            | 17.1             | 92.0  |
| 2008–2012       | 24.6            | 23.5             | 72.0  | 18.2            | 33.8             | 85.5  | 21.2            | 17.5             | 122.4 | 8.8             | 13.8             | 77.4  |
|                 | 35–44           |                  |       | >74 y/o         |                  |       | 35–44           |                  |       | >74 y/o         |                  |       |
| 1983–1987       | 25.0            | 25.5             | 80.2  | 7.8             | 43.9             | 56.0  | 14.2            | 13.4             | 113.8 | 10.4            | 37.0             | 64.1  |
| 1988–1992       | 20.4            | 22.7             | 95.9  | 8.8             | 40.8             | 63.3  | 8.2             | 9.1              | 94.0  | 10.6            | 30.4             | 63.6  |
| 1993–1997       | 13.8            | 17.8             | 72.6  | 9.4             | 37.6             | 72.3  | 7.4             | 9.0              | 105.7 | 8.8             | 21.3             | 61.9  |
| 1998–2002       | 24.8            | 28.8             | 81.8  | 10.8            | 34.9             | 66.3  | 10.2            | 11.3             | 109.1 | 11.0            | 21.3             | 68.5  |
| 2003–2007       | 25.8            | 25.9             | 64.7  | 11.0            | 29.5             | 65.6  | 13.6            | 12.8             | 101.3 | 9.6             | 15.2             | 67.5  |
| 2008–2012       | 29.2            | 26.9             | 72.2  | 12.0            | 28.1             | 67.8  | 15.6            | 12.8             | 94.4  | 8.8             | 11.9             | 62.1  |

Secondary Medical Zone ID: 107

|                 | Male            |                  |       |                 |                  |       | Female          |                  |       |                 |                  |       |
|-----------------|-----------------|------------------|-------|-----------------|------------------|-------|-----------------|------------------|-------|-----------------|------------------|-------|
|                 | Suicide         |                  |       | Suicide         |                  |       | Suicide         |                  |       | Suicide         |                  |       |
|                 | Num<br>per year | Rate<br>/100,000 | × 100 | Num<br>per year | Rate<br>/100,000 | × 100 | Num<br>per year | Rate<br>/100,000 | × 100 | Num<br>per year | Rate<br>/100,000 | × 100 |
|                 |                 |                  |       |                 |                  |       |                 |                  |       |                 |                  |       |
| Total (>10 y/o) | 45–54           | Total (>10 y/o)  | 45–54 |                 |                  |       |                 |                  |       |                 |                  |       |
| 1983–1987       | 132.4           | 27.0             | 81.7  | 27.4            | 40.3             | 79.7  | 72.4            | 13.3             | 85.8  | 13.0            | 16.3             | 94.7  |
| 1988–1992       | 95.2            | 20.0             | 78.7  | 20.8            | 29.8             | 86.7  | 65.2            | 11.6             | 88.9  | 10.4            | 13.6             | 92.8  |
| 1993–1997       | 112.8           | 22.5             | 89.2  | 27.2            | 35.2             | 96.2  | 62.6            | 11.0             | 97.5  | 12.2            | 14.9             | 115.1 |
| 1998–2002       | 174.4           | 33.3             | 91.9  | 40.4            | 54.3             | 97.0  | 78.4            | 13.6             | 101.7 | 13.4            | 17.6             | 117.2 |
| 2003–2007       | 167.6           | 31.1             | 84.7  | 26.2            | 39.6             | 70.8  | 84.8            | 14.6             | 110.2 | 8.6             | 13.2             | 96.5  |
| 2008–2012       | 171.8           | 33.7             | 96.6  | 25.4            | 38.9             | 80.0  | 88.6            | 16.0             | 118.6 | 11.6            | 17.2             | 115.5 |
|                 | 15–24           |                  |       | 55–64           |                  |       | 15–24           |                  |       | 55–64           |                  |       |
| 1983–1987       | 16.0            | 12.3             | 88.0  | 17.6            | 35.4             | 83.4  | 8.4             | 7.7              | 112.8 | 10.0            | 16.1             | 81.4  |
| 1988–1992       | 9.8             | 8.9              | 90.0  | 16.2            | 29.3             | 82.6  | 8.2             | 7.7              | 146.0 | 11.8            | 17.4             | 97.7  |
| 1993–1997       | 13.4            | 13.7             | 121.4 | 21.8            | 36.9             | 91.6  | 6.2             | 6.7              | 128.2 | 10.0            | 14.8             | 93.0  |
| 1998–2002       | 12.8            | 15.4             | 97.4  | 41.6            | 65.9             | 103.8 | 7.2             | 8.8              | 125.3 | 13.8            | 19.9             | 105.5 |
| 2003–2007       | 14.4            | 20.2             | 116.0 | 29.8            | 43.7             | 75.7  | 11.4            | 15.8             | 175.2 | 14.0            | 18.8             | 112.1 |
| 2008–2012       | 14.4            | 25.9             | 122.0 | 30.4            | 46.3             | 95.4  | 8.0             | 13.9             | 143.7 | 13.6            | 19.0             | 127.6 |
|                 | 25–34           |                  |       | 65–74           |                  |       | 25–34           |                  |       | 65–74           |                  |       |
| 1983–1987       | 25.0            | 23.1             | 90.5  | 9.8             | 33.0             | 75.3  | 8.0             | 8.8              | 82.1  | 11.4            | 27.7             | 88.5  |
| 1988–1992       | 15.0            | 15.3             | 80.2  | 6.2             | 20.7             | 58.9  | 8.2             | 9.2              | 105.8 | 6.2             | 14.5             | 55.7  |
| 1993–1997       | 19.4            | 19.5             | 100.0 | 9.4             | 24.5             | 76.7  | 10.4            | 10.9             | 131.1 | 7.2             | 14.0             | 72.1  |
| 1998–2002       | 28.4            | 25.8             | 95.6  | 17.4            | 38.5             | 84.8  | 14.0            | 13.5             | 116.1 | 8.4             | 15.1             | 71.7  |
| 2003–2007       | 34.0            | 30.9             | 99.8  | 21.4            | 43.0             | 100.3 | 20.0            | 18.5             | 142.6 | 8.6             | 14.7             | 79.2  |
| 2008–2012       | 36.4            | 38.6             | 118.7 | 17.8            | 35.3             | 89.3  | 20.0            | 21.8             | 152.2 | 9.8             | 16.3             | 91.5  |
|                 | 35–44           |                  |       | >74 y/o         |                  |       | 35–44           |                  |       | >74 y/o         |                  |       |
| 1983–1987       | 27.2            | 30.2             | 94.9  | 8.8             | 50.5             | 64.5  | 12.0            | 12.8             | 108.2 | 9.0             | 33.9             | 58.8  |
| 1988–1992       | 19.4            | 23.6             | 99.5  | 7.4             | 37.1             | 57.5  | 9.2             | 11.0             | 114.4 | 11.0            | 32.7             | 68.3  |
| 1993–1997       | 14.6            | 20.7             | 84.6  | 7.0             | 31.0             | 59.6  | 7.0             | 9.9              | 116.3 | 9.4             | 23.7             | 68.8  |
| 1998–2002       | 23.4            | 31.1             | 88.2  | 10.0            | 35.8             | 67.9  | 11.8            | 15.4             | 148.8 | 9.8             | 20.4             | 65.7  |
| 2003–2007       | 28.8            | 33.8             | 84.3  | 12.8            | 36.0             | 79.9  | 14.2            | 16.5             | 130.9 | 8.0             | 13.8             | 61.3  |
| 2008–2012       | 34.8            | 39.7             | 106.8 | 12.4            | 31.2             | 75.2  | 16.6            | 18.5             | 136.7 | 9.0             | 13.5             | 70.2  |

Secondary Medical Zone ID: 108

|           | Male            |                  |       |                 |                  |       | Female          |                  |       |                 |                  |       |
|-----------|-----------------|------------------|-------|-----------------|------------------|-------|-----------------|------------------|-------|-----------------|------------------|-------|
|           | Suicide         |                  |       | Suicide         |                  |       | Suicide         |                  |       | Suicide         |                  |       |
|           | Num<br>per year | Rate<br>/100,000 | × 100 | Num<br>per year | Rate<br>/100,000 | × 100 | Num<br>per year | Rate<br>/100,000 | × 100 | Num<br>per year | Rate<br>/100,000 | × 100 |
|           |                 |                  |       |                 |                  |       |                 |                  |       |                 |                  |       |
|           | Total (>10 y/o) |                  |       | 45–54           |                  |       | Total (>10 y/o) |                  |       | 45–54           |                  |       |
| 1983–1987 | 204.2           | 28.5             | 87.2  | 51.6            | 45.4             | 89.7  | 109.2           | 14.4             | 94.9  | 17.8            | 14.7             | 85.4  |
| 1988–1992 | 166.8           | 21.9             | 88.9  | 39.0            | 32.3             | 93.9  | 95.2            | 11.6             | 89.7  | 17.8            | 14.2             | 96.9  |
| 1993–1997 | 198.6           | 24.2             | 97.8  | 51.6            | 39.1             | 106.8 | 91.6            | 10.6             | 95.0  | 14.8            | 11.7             | 90.3  |
| 1998–2002 | 275.2           | 32.5             | 90.7  | 67.2            | 53.8             | 96.1  | 127.4           | 14.0             | 108.1 | 21.0            | 17.4             | 115.7 |
| 2003–2007 | 287.4           | 34.3             | 93.2  | 56.2            | 51.4             | 91.8  | 124.2           | 14.3             | 107.3 | 15.8            | 15.1             | 109.9 |
| 2008–2012 | 281.6           | 32.8             | 94.0  | 56.6            | 49.7             | 102.3 | 135.2           | 14.8             | 111.7 | 18.8            | 16.9             | 113.4 |
|           | 15–24           |                  |       | 55–64           |                  |       | 15–24           |                  |       | 55–64           |                  |       |
| 1983–1987 | 17.4            | 11.0             | 78.8  | 30.8            | 39.7             | 93.4  | 11.6            | 8.1              | 118.2 | 15.2            | 17.1             | 86.8  |
| 1988–1992 | 15.4            | 9.8              | 98.9  | 30.4            | 32.0             | 90.2  | 7.4             | 5.2              | 98.3  | 15.2            | 14.8             | 83.0  |
| 1993–1997 | 17.4            | 12.5             | 110.8 | 43.4            | 41.2             | 102.3 | 11.0            | 8.1              | 154.8 | 15.8            | 14.1             | 88.5  |
| 1998–2002 | 17.0            | 14.7             | 93.0  | 72.0            | 64.6             | 101.7 | 9.6             | 8.5              | 120.4 | 22.0            | 18.7             | 99.3  |
| 2003–2007 | 13.4            | 14.4             | 82.4  | 64.6            | 53.8             | 93.2  | 12.0            | 12.4             | 138.2 | 22.4            | 18.2             | 108.6 |
| 2008–2012 | 21.4            | 24.0             | 113.0 | 57.6            | 49.7             | 102.3 | 11.4            | 12.6             | 129.4 | 20.2            | 17.6             | 117.7 |
|           | 25–34           |                  |       | 65–74           |                  |       | 25–34           |                  |       | 65–74           |                  |       |
| 1983–1987 | 33.4            | 23.0             | 89.9  | 12.4            | 30.8             | 70.3  | 15.4            | 12.2             | 113.2 | 14.6            | 26.9             | 86.1  |
| 1988–1992 | 24.4            | 17.3             | 90.7  | 14.4            | 29.5             | 83.6  | 10.0            | 8.2              | 94.1  | 16.6            | 25.2             | 96.6  |
| 1993–1997 | 29.0            | 19.8             | 101.2 | 21.2            | 32.6             | 102.2 | 14.2            | 10.5             | 126.7 | 14.2            | 17.8             | 91.5  |
| 1998–2002 | 37.0            | 24.5             | 90.6  | 30.6            | 38.4             | 84.4  | 22.8            | 15.8             | 136.2 | 20.0            | 21.0             | 99.8  |
| 2003–2007 | 46.4            | 33.0             | 106.4 | 35.2            | 39.7             | 92.4  | 21.4            | 16.0             | 122.7 | 20.8            | 19.7             | 105.8 |
| 2008–2012 | 36.4            | 25.8             | 79.2  | 38.4            | 42.5             | 107.5 | 24.2            | 18.0             | 125.7 | 17.0            | 16.3             | 91.5  |
|           | 35–44           |                  |       | >74 y/o         |                  |       | 35–44           |                  |       | >74 y/o         |                  |       |
| 1983–1987 | 45.4            | 31.6             | 99.2  | 12.6            | 60.3             | 77.0  | 19.0            | 13.5             | 114.0 | 15.0            | 46.8             | 81.1  |
| 1988–1992 | 29.4            | 21.8             | 91.8  | 13.6            | 50.2             | 77.8  | 12.4            | 9.9              | 102.5 | 15.2            | 35.1             | 73.3  |
| 1993–1997 | 25.8            | 22.0             | 89.6  | 10.0            | 31.7             | 60.8  | 11.0            | 10.1             | 118.3 | 10.6            | 19.9             | 57.7  |
| 1998–2002 | 34.4            | 29.3             | 83.3  | 16.0            | 37.4             | 71.0  | 14.6            | 13.2             | 127.2 | 17.0            | 24.4             | 78.4  |
| 2003–2007 | 50.8            | 39.5             | 98.5  | 20.0            | 35.1             | 77.9  | 20.4            | 16.5             | 130.8 | 11.2            | 12.8             | 56.8  |
| 2008–2012 | 46.8            | 30.9             | 83.1  | 23.4            | 35.2             | 84.8  | 23.4            | 16.2             | 119.4 | 20.2            | 18.3             | 95.2  |

Secondary Medical Zone ID: 109

|           | Male            |                  |       |                 |                  |       | Female          |                  |       |                 |                  |       |
|-----------|-----------------|------------------|-------|-----------------|------------------|-------|-----------------|------------------|-------|-----------------|------------------|-------|
|           | Suicide         |                  |       | Suicide         |                  |       | Suicide         |                  |       | Suicide         |                  |       |
|           | Num<br>per year | Rate<br>/100,000 | × 100 | Num<br>per year | Rate<br>/100,000 | × 100 | Num<br>per year | Rate<br>/100,000 | × 100 | Num<br>per year | Rate<br>/100,000 | × 100 |
|           |                 |                  |       |                 |                  |       |                 |                  |       |                 |                  |       |
|           | Total (>10 y/o) |                  |       | 45–54           |                  |       | Total (>10 y/o) |                  |       | 45–54           |                  |       |
| 1983–1987 | 157.8           | 30.9             | 94.2  | 47.6            | 51.2             | 101.3 | 82.8            | 15.9             | 103.6 | 14.0            | 15.6             | 90.4  |
| 1988–1992 | 131.8           | 24.1             | 97.4  | 29.2            | 30.7             | 89.3  | 71.2            | 12.3             | 96.5  | 10.2            | 11.4             | 78.0  |
| 1993–1997 | 153.4           | 25.7             | 104.8 | 42.4            | 42.5             | 116.2 | 71.2            | 11.5             | 105.7 | 13.0            | 13.7             | 106.0 |
| 1998–2002 | 229.8           | 37.6             | 105.8 | 55.0            | 60.2             | 107.6 | 85.2            | 13.6             | 105.1 | 11.0            | 13.6             | 90.6  |
| 2003–2007 | 218.2           | 34.6             | 97.8  | 43.2            | 54.2             | 96.8  | 84.6            | 13.7             | 105.3 | 10.8            | 14.9             | 108.9 |
| 2008–2012 | 211.4           | 32.3             | 96.5  | 35.2            | 42.3             | 87.1  | 101.4           | 15.2             | 118.6 | 15.8            | 20.3             | 136.3 |
|           | 15–24           |                  |       | 55–64           |                  |       | 15–24           |                  |       | 55–64           |                  |       |
| 1983–1987 | 11.6            | 11.4             | 81.9  | 26.2            | 46.4             | 109.1 | 7.6             | 7.6              | 111.9 | 13.6            | 21.9             | 111.0 |
| 1988–1992 | 10.2            | 9.8              | 98.9  | 27.8            | 37.5             | 105.6 | 7.4             | 7.2              | 135.9 | 12.0            | 16.5             | 92.4  |
| 1993–1997 | 9.6             | 11.0             | 97.7  | 40.8            | 47.7             | 118.6 | 5.8             | 6.6              | 127.1 | 12.8            | 15.2             | 95.6  |
| 1998–2002 | 12.4            | 17.4             | 110.3 | 57.8            | 65.6             | 103.3 | 4.6             | 7.0              | 99.6  | 17.2            | 19.1             | 101.7 |
| 2003–2007 | 7.0             | 12.6             | 72.0  | 59.2            | 63.7             | 110.4 | 6.6             | 10.9             | 121.3 | 12.6            | 14.5             | 86.6  |
| 2008–2012 | 12.4            | 20.6             | 97.0  | 47.0            | 51.9             | 106.8 | 7.6             | 12.6             | 129.5 | 17.8            | 20.2             | 135.3 |
|           | 25–34           |                  |       | 65–74           |                  |       | 25–34           |                  |       | 65–74           |                  |       |
| 1983–1987 | 19.4            | 21.5             | 84.2  | 8.4             | 30.3             | 69.2  | 10.0            | 12.3             | 114.3 | 11.4            | 28.9             | 92.5  |
| 1988–1992 | 15.8            | 17.1             | 89.4  | 11.2            | 32.6             | 92.5  | 7.6             | 9.2              | 106.6 | 9.8             | 21.8             | 83.7  |
| 1993–1997 | 19.2            | 19.4             | 99.2  | 13.8            | 30.4             | 95.2  | 9.6             | 10.4             | 124.8 | 10.0            | 18.5             | 94.7  |
| 1998–2002 | 28.4            | 27.8             | 103.0 | 29.0            | 47.9             | 105.3 | 12.6            | 13.3             | 114.9 | 12.8            | 19.5             | 92.8  |
| 2003–2007 | 22.8            | 24.4             | 78.8  | 36.2            | 50.9             | 118.7 | 15.2            | 16.8             | 129.1 | 14.4            | 18.5             | 99.5  |
| 2008–2012 | 21.8            | 25.3             | 77.8  | 36.0            | 47.0             | 118.9 | 12.6            | 15.3             | 106.8 | 17.2            | 19.8             | 111.5 |
|           | 35–44           |                  |       | >74 y/o         |                  |       | 35–44           |                  |       | >74 y/o         |                  |       |
| 1983–1987 | 31.6            | 30.0             | 94.3  | 12.8            | 86.5             | 110.4 | 10.0            | 10.4             | 87.6  | 15.8            | 72.4             | 125.6 |
| 1988–1992 | 22.6            | 23.3             | 98.5  | 14.6            | 77.8             | 120.6 | 9.4             | 10.6             | 110.0 | 14.2            | 48.4             | 101.2 |
| 1993–1997 | 17.4            | 21.3             | 86.8  | 9.8             | 46.0             | 88.3  | 7.4             | 9.9              | 116.2 | 12.2            | 32.8             | 95.4  |
| 1998–2002 | 32.4            | 38.7             | 110.0 | 14.4            | 53.0             | 100.6 | 12.8            | 16.2             | 156.8 | 13.8            | 29.6             | 95.2  |
| 2003–2007 | 32.8            | 34.9             | 87.0  | 16.8            | 45.8             | 101.7 | 13.0            | 15.0             | 118.6 | 11.8            | 19.7             | 87.9  |
| 2008–2012 | 38.8            | 35.1             | 94.2  | 20.0            | 40.3             | 97.2  | 15.2            | 15.0             | 111.0 | 15.0            | 19.2             | 99.9  |

Secondary Medical Zone ID: 110

|           | Male            |                  |       |                 |                  |       | Female          |                  |       |                 |                  |       |
|-----------|-----------------|------------------|-------|-----------------|------------------|-------|-----------------|------------------|-------|-----------------|------------------|-------|
|           | Suicide         |                  |       | Suicide         |                  |       | Suicide         |                  |       | Suicide         |                  |       |
|           | Num<br>per year | Rate<br>/100,000 | × 100 | Num<br>per year | Rate<br>/100,000 | × 100 | Num<br>per year | Rate<br>/100,000 | × 100 | Num<br>per year | Rate<br>/100,000 | × 100 |
|           |                 |                  |       |                 |                  |       |                 |                  |       |                 |                  |       |
|           | Total (>10 y/o) |                  |       | 45–54           |                  |       | Total (>10 y/o) |                  |       | 45–54           |                  |       |
| 1983–1987 | 148.0           | 32.0             | 96.9  | 41.0            | 49.3             | 97.5  | 67.4            | 14.5             | 94.8  | 11.6            | 15.0             | 86.9  |
| 1988–1992 | 113.2           | 22.5             | 90.3  | 30.6            | 33.3             | 96.9  | 67.6            | 12.8             | 100.3 | 12.2            | 13.9             | 95.2  |
| 1993–1997 | 146.6           | 25.9             | 105.1 | 37.8            | 38.1             | 104.1 | 57.2            | 10.2             | 92.2  | 14.2            | 14.8             | 114.8 |
| 1998–2002 | 218.8           | 35.5             | 101.6 | 51.8            | 55.5             | 99.2  | 84.8            | 13.7             | 107.8 | 14.6            | 16.6             | 110.4 |
| 2003–2007 | 212.2           | 32.8             | 91.5  | 36.2            | 44.0             | 78.6  | 83.8            | 13.1             | 102.6 | 10.2            | 13.6             | 99.4  |
| 2008–2012 | 218.0           | 32.8             | 97.0  | 36.8            | 42.6             | 87.6  | 99.0            | 14.6             | 114.1 | 14.0            | 17.8             | 119.0 |
|           | 15–24           |                  |       | 55–64           |                  |       | 15–24           |                  |       | 55–64           |                  |       |
| 1983–1987 | 11.8            | 12.7             | 91.2  | 20.4            | 42.8             | 100.7 | 5.4             | 6.4              | 94.1  | 10.0            | 19.1             | 96.7  |
| 1988–1992 | 8.8             | 9.0              | 90.5  | 19.0            | 30.3             | 85.4  | 5.6             | 6.0              | 113.6 | 8.2             | 13.6             | 76.3  |
| 1993–1997 | 11.8            | 12.8             | 113.1 | 33.6            | 43.8             | 108.7 | 5.4             | 6.3              | 120.6 | 10.4            | 14.1             | 88.6  |
| 1998–2002 | 10.8            | 14.6             | 92.5  | 66.8            | 77.6             | 122.2 | 6.2             | 8.5              | 121.6 | 17.8            | 20.7             | 110.2 |
| 2003–2007 | 11.2            | 16.9             | 96.8  | 58.2            | 62.2             | 107.8 | 5.4             | 8.7              | 97.0  | 17.2            | 18.7             | 111.4 |
| 2008–2012 | 10.0            | 17.1             | 80.5  | 48.0            | 53.3             | 109.8 | 7.2             | 11.8             | 121.2 | 18.6            | 20.6             | 138.3 |
|           | 25–34           |                  |       | 65–74           |                  |       | 25–34           |                  |       | 65–74           |                  |       |
| 1983–1987 | 18.8            | 21.8             | 85.5  | 12.8            | 50.0             | 114.3 | 9.6             | 11.9             | 111.0 | 7.8             | 24.0             | 76.8  |
| 1988–1992 | 14.8            | 16.8             | 87.8  | 8.6             | 30.0             | 85.2  | 8.0             | 9.8              | 113.4 | 8.4             | 21.6             | 82.6  |
| 1993–1997 | 23.6            | 23.5             | 120.3 | 11.6            | 30.1             | 94.3  | 6.6             | 7.7              | 93.1  | 7.8             | 16.8             | 86.0  |
| 1998–2002 | 24.6            | 22.7             | 84.1  | 27.2            | 51.5             | 113.2 | 14.2            | 13.8             | 119.3 | 12.8            | 21.7             | 103.5 |
| 2003–2007 | 29.6            | 26.7             | 85.9  | 29.8            | 46.6             | 108.7 | 14.6            | 14.0             | 107.8 | 11.6            | 16.8             | 90.4  |
| 2008–2012 | 29.2            | 29.2             | 89.5  | 31.0            | 43.4             | 109.9 | 14.2            | 15.0             | 104.8 | 15.2            | 19.1             | 107.5 |
|           | 35–44           |                  |       | >74 y/o         |                  |       | 35–44           |                  |       | >74 y/o         |                  |       |
| 1983–1987 | 32.0            | 30.4             | 95.6  | 11.2            | 89.1             | 113.8 | 12.2            | 12.3             | 104.5 | 9.4             | 52.4             | 90.8  |
| 1988–1992 | 20.2            | 20.9             | 88.0  | 11.2            | 71.2             | 110.4 | 13.4            | 14.0             | 144.8 | 11.0            | 44.1             | 92.2  |
| 1993–1997 | 19.2            | 23.3             | 95.1  | 8.8             | 48.8             | 93.6  | 6.4             | 8.6              | 100.7 | 6.0             | 19.9             | 57.7  |
| 1998–2002 | 25.0            | 29.4             | 83.5  | 12.6            | 53.7             | 102.0 | 9.0             | 11.6             | 112.0 | 9.8             | 24.4             | 78.6  |
| 2003–2007 | 34.4            | 32.1             | 80.2  | 12.8            | 41.0             | 91.1  | 14.8            | 15.1             | 119.5 | 10.0            | 19.2             | 85.4  |
| 2008–2012 | 43.4            | 34.8             | 93.6  | 19.0            | 44.7             | 107.8 | 16.0            | 13.9             | 102.8 | 13.4            | 19.8             | 103.2 |

Secondary Medical Zone ID: 111

|           | Male            |          |       |          |          |       | Female          |          |       |          |          |       |
|-----------|-----------------|----------|-------|----------|----------|-------|-----------------|----------|-------|----------|----------|-------|
|           | Suicide         |          |       | Suicide  |          |       | Suicide         |          |       | Suicide  |          |       |
|           | Num             | Rate     | × 100 | Num      | Rate     | × 100 | Num             | Rate     | × 100 | Num      | Rate     | × 100 |
|           | per year        | /100,000 |       | per year | /100,000 |       | per year        | /100,000 |       | per year | /100,000 |       |
|           | Total (>10 y/o) |          |       | 45–54    |          |       | Total (>10 y/o) |          |       | 45–54    |          |       |
| 1983–1987 | 37.0            | 30.5     | 89.1  | 9.4      | 44.1     | 87.2  | 20.4            | 15.5     | 104.7 | 3.4      | 17.0     | 98.5  |
| 1988–1992 | 34.2            | 22.8     | 90.2  | 8.4      | 31.1     | 90.7  | 18.8            | 12.0     | 91.1  | 3.0      | 13.0     | 89.0  |
| 1993–1997 | 43.6            | 24.5     | 97.8  | 13.4     | 41.0     | 112.1 | 18.4            | 10.3     | 90.9  | 3.0      | 11.1     | 86.0  |
| 1998–2002 | 65.8            | 34.6     | 96.0  | 16.4     | 54.1     | 96.7  | 22.0            | 11.7     | 87.5  | 4.4      | 15.0     | 99.6  |
| 2003–2007 | 61.8            | 32.7     | 87.8  | 11.8     | 46.0     | 82.3  | 23.2            | 12.3     | 92.8  | 1.6      | 9.5      | 69.5  |
| 2008–2012 | 68.4            | 35.5     | 103.0 | 12.6     | 49.9     | 102.6 | 25.2            | 13.2     | 98.9  | 5.0      | 19.0     | 127.6 |
|           | 15–24           |          |       | 55–64    |          |       | 15–24           |          |       | 55–64    |          |       |
| 1983–1987 | 3.2             | 13.1     | 93.6  | 4.8      | 38.6     | 90.8  | 2.8             | 9.6      | 141.3 | 3.0      | 20.6     | 104.4 |
| 1988–1992 | 3.0             | 9.6      | 97.2  | 5.4      | 31.2     | 88.0  | 1.6             | 5.5      | 104.3 | 3.4      | 18.7     | 104.8 |
| 1993–1997 | 2.8             | 9.9      | 87.4  | 8.0      | 36.8     | 91.4  | 1.4             | 5.1      | 97.6  | 2.6      | 13.6     | 85.9  |
| 1998–2002 | 4.6             | 16.8     | 106.1 | 15.6     | 59.1     | 93.0  | 1.6             | 6.8      | 97.4  | 3.8      | 16.5     | 87.4  |
| 2003–2007 | 4.2             | 17.9     | 102.5 | 14.2     | 48.9     | 84.8  | 1.4             | 7.7      | 85.7  | 5.0      | 16.9     | 100.8 |
| 2008–2012 | 3.8             | 19.5     | 92.2  | 14.4     | 49.0     | 100.9 | 1.6             | 9.0      | 92.7  | 4.4      | 15.1     | 100.9 |
|           | 25–34           |          |       | 65–74    |          |       | 25–34           |          |       | 65–74    |          |       |
| 1983–1987 | 5.6             | 24.2     | 94.8  | 3.6      | 48.9     | 111.6 | 2.6             | 11.6     | 107.5 | 3.0      | 32.4     | 103.7 |
| 1988–1992 | 4.2             | 16.8     | 87.9  | 2.4      | 29.5     | 83.6  | 2.4             | 9.8      | 112.5 | 2.4      | 22.2     | 85.1  |
| 1993–1997 | 4.6             | 16.4     | 83.7  | 3.8      | 30.6     | 96.0  | 3.2             | 10.6     | 127.8 | 2.6      | 18.5     | 94.9  |
| 1998–2002 | 9.6             | 29.1     | 107.9 | 5.8      | 38.2     | 83.9  | 4.2             | 13.7     | 118.2 | 3.2      | 19.3     | 91.9  |
| 2003–2007 | 10.2            | 33.7     | 108.6 | 8.0      | 40.0     | 93.2  | 3.8             | 14.2     | 108.8 | 4.2      | 19.7     | 106.0 |
| 2008–2012 | 10.4            | 39.9     | 122.6 | 9.4      | 38.7     | 98.1  | 3.6             | 16.0     | 111.8 | 6.0      | 21.7     | 122.2 |
|           | 35–44           |          |       | >74 y/o  |          |       | 35–44           |          |       | >74 y/o  |          |       |
| 1983–1987 | 6.0             | 22.1     | 69.3  | 4.2      | 104.4    | 133.3 | 3.6             | 12.1     | 102.4 | 2.0      | 44.6     | 77.4  |
| 1988–1992 | 6.0             | 20.4     | 86.3  | 4.6      | 77.9     | 120.8 | 3.4             | 10.9     | 112.5 | 2.6      | 29.9     | 62.5  |
| 1993–1997 | 7.0             | 25.1     | 102.2 | 4.0      | 57.3     | 110.1 | 2.8             | 10.0     | 117.9 | 2.8      | 22.9     | 66.5  |
| 1998–2002 | 9.6             | 36.0     | 102.1 | 4.2      | 49.1     | 93.2  | 1.6             | 8.2      | 79.6  | 3.2      | 20.2     | 64.9  |
| 2003–2007 | 7.2             | 27.6     | 68.9  | 6.2      | 50.6     | 112.4 | 4.6             | 15.9     | 126.2 | 2.6      | 13.8     | 61.4  |
| 2008–2012 | 11.8            | 38.1     | 102.4 | 5.8      | 39.0     | 94.0  | 2.6             | 11.3     | 83.6  | 2.0      | 10.3     | 53.6  |



Secondary Medical Zone ID: 112

|           | Male            |                  |       |                 |                  |       | Female          |                  |       |                 |                  |       |
|-----------|-----------------|------------------|-------|-----------------|------------------|-------|-----------------|------------------|-------|-----------------|------------------|-------|
|           | Suicide         |                  |       | Suicide         |                  |       | Suicide         |                  |       | Suicide         |                  |       |
|           | Num<br>per year | Rate<br>/100,000 | × 100 | Num<br>per year | Rate<br>/100,000 | × 100 | Num<br>per year | Rate<br>/100,000 | × 100 | Num<br>per year | Rate<br>/100,000 | × 100 |
|           |                 |                  |       |                 |                  |       |                 |                  |       |                 |                  |       |
|           | Total (>10 y/o) |                  |       | 45–54           |                  |       | Total (>10 y/o) |                  |       | 45–54           |                  |       |
| 1983–1987 | 95.0            | 25.0             | 71.5  | 27.8            | 37.9             | 75.0  | 53.6            | 13.9             | 88.8  | 11.0            | 16.0             | 92.8  |
| 1988–1992 | 91.2            | 19.2             | 76.2  | 22.2            | 25.7             | 74.8  | 55.8            | 11.4             | 88.1  | 11.6            | 13.4             | 91.6  |
| 1993–1997 | 116.0           | 21.0             | 82.2  | 27.6            | 28.9             | 79.0  | 58.6            | 10.2             | 93.0  | 13.4            | 13.2             | 102.1 |
| 1998–2002 | 176.2           | 28.9             | 79.6  | 39.4            | 43.5             | 77.6  | 77.6            | 12.1             | 94.9  | 15.0            | 15.5             | 102.9 |
| 2003–2007 | 171.8           | 27.0             | 72.7  | 28.8            | 36.0             | 64.4  | 89.4            | 13.5             | 103.9 | 12.8            | 15.1             | 110.3 |
| 2008–2012 | 192.8           | 29.8             | 83.9  | 33.6            | 40.1             | 82.5  | 93.0            | 13.4             | 102.7 | 12.2            | 15.0             | 100.5 |
|           | 15–24           |                  |       | 55–64           |                  |       | 15–24           |                  |       | 55–64           |                  |       |
| 1983–1987 | 12.4            | 12.6             | 90.7  | 9.4             | 26.0             | 61.3  | 5.0             | 6.3              | 91.5  | 8.6             | 20.6             | 104.5 |
| 1988–1992 | 13.0            | 10.1             | 102.3 | 16.6            | 28.8             | 81.2  | 3.8             | 3.9              | 74.9  | 7.2             | 13.8             | 77.2  |
| 1993–1997 | 14.2            | 11.1             | 98.1  | 23.6            | 32.1             | 79.8  | 5.0             | 4.8              | 92.7  | 9.8             | 13.9             | 87.6  |
| 1998–2002 | 15.0            | 13.2             | 83.8  | 45.0            | 52.2             | 82.1  | 8.8             | 8.9              | 127.0 | 16.0            | 18.1             | 96.4  |
| 2003–2007 | 16.2            | 16.0             | 91.9  | 41.0            | 43.3             | 75.0  | 7.2             | 8.6              | 95.5  | 14.0            | 14.3             | 85.1  |
| 2008–2012 | 17.4            | 19.7             | 93.1  | 34.8            | 38.6             | 79.5  | 7.0             | 9.2              | 94.7  | 15.0            | 15.2             | 101.6 |
|           | 25–34           |                  |       | 65–74           |                  |       | 25–34           |                  |       | 65–74           |                  |       |
| 1983–1987 | 14.6            | 20.7             | 80.8  | 5.8             | 33.0             | 75.3  | 6.6             | 9.7              | 89.7  | 7.6             | 30.4             | 97.3  |
| 1988–1992 | 9.4             | 12.2             | 63.7  | 6.6             | 26.7             | 75.8  | 5.6             | 7.9              | 91.4  | 7.2             | 22.5             | 86.1  |
| 1993–1997 | 15.8            | 16.7             | 85.5  | 10.2            | 27.1             | 85.1  | 9.8             | 11.1             | 134.0 | 7.2             | 17.1             | 87.9  |
| 1998–2002 | 27.6            | 26.0             | 96.3  | 19.4            | 36.9             | 81.2  | 9.8             | 10.6             | 91.8  | 9.2             | 17.0             | 81.1  |
| 2003–2007 | 25.2            | 25.1             | 81.1  | 20.0            | 30.0             | 69.8  | 18.0            | 18.4             | 141.7 | 13.0            | 18.2             | 97.5  |
| 2008–2012 | 30.6            | 34.1             | 104.7 | 24.8            | 31.4             | 79.6  | 12.6            | 15.3             | 106.7 | 16.2            | 18.3             | 102.7 |
|           | 35–44           |                  |       | >74 y/o         |                  |       | 35–44           |                  |       | >74 y/o         |                  |       |
| 1983–1987 | 16.8            | 18.6             | 58.4  | 8.2             | 86.6             | 110.6 | 7.8             | 8.5              | 72.1  | 6.6             | 48.7             | 84.3  |
| 1988–1992 | 15.2            | 17.3             | 73.1  | 8.0             | 58.5             | 90.6  | 9.4             | 10.1             | 104.4 | 10.4            | 44.1             | 92.2  |
| 1993–1997 | 16.0            | 20.4             | 83.3  | 8.2             | 46.8             | 89.8  | 5.8             | 7.6              | 89.2  | 7.4             | 24.0             | 69.7  |
| 1998–2002 | 20.6            | 25.6             | 72.7  | 8.6             | 37.1             | 70.4  | 7.6             | 9.9              | 95.8  | 10.8            | 25.9             | 83.4  |
| 2003–2007 | 27.0            | 28.0             | 69.8  | 13.6            | 38.4             | 85.4  | 13.6            | 14.7             | 116.2 | 10.8            | 19.4             | 86.6  |
| 2008–2012 | 33.6            | 30.1             | 80.9  | 17.6            | 35.8             | 86.3  | 17.2            | 15.9             | 117.1 | 12.2            | 17.0             | 88.3  |

Secondary Medical Zone ID: 113

|           | Male            |                  |       |                 |                  |       | Female          |                  |       |                 |                  |       |
|-----------|-----------------|------------------|-------|-----------------|------------------|-------|-----------------|------------------|-------|-----------------|------------------|-------|
|           | Suicide         |                  |       | Suicide         |                  |       | Suicide         |                  |       | Suicide         |                  |       |
|           | Num<br>per year | Rate<br>/100,000 | × 100 | Num<br>per year | Rate<br>/100,000 | × 100 | Num<br>per year | Rate<br>/100,000 | × 100 | Num<br>per year | Rate<br>/100,000 | × 100 |
|           |                 |                  |       |                 |                  |       |                 |                  |       |                 |                  |       |
|           | Total (>10 y/o) |                  |       | 45–54           |                  |       | Total (>10 y/o) |                  |       | 45–54           |                  |       |
| 1983–1987 | 63.8            | 31.1             | 93.0  | 16.8            | 46.4             | 91.7  | 27.6            | 13.8             | 88.2  | 4.2             | 13.1             | 75.9  |
| 1988–1992 | 57.8            | 24.4             | 99.1  | 14.8            | 36.5             | 106.4 | 28.4            | 12.0             | 91.8  | 3.8             | 11.0             | 74.9  |
| 1993–1997 | 56.0            | 22.0             | 85.3  | 13.4            | 31.5             | 86.1  | 28.4            | 10.4             | 95.3  | 5.6             | 12.7             | 98.2  |
| 1998–2002 | 85.8            | 31.1             | 84.8  | 15.4            | 38.8             | 69.3  | 39.6            | 13.1             | 103.7 | 7.0             | 16.2             | 107.5 |
| 2003–2007 | 92.4            | 32.1             | 86.1  | 18.0            | 47.4             | 84.8  | 36.8            | 12.4             | 94.8  | 6.2             | 15.7             | 114.8 |
| 2008–2012 | 90.6            | 31.2             | 87.2  | 18.0            | 44.8             | 92.1  | 38.8            | 12.8             | 95.2  | 6.6             | 16.7             | 111.8 |
|           | 15–24           |                  |       | 55–64           |                  |       | 15–24           |                  |       | 55–64           |                  |       |
| 1983–1987 | 4.4             | 9.9              | 71.0  | 9.0             | 42.3             | 99.5  | 2.6             | 6.3              | 92.5  | 4.4             | 19.3             | 97.6  |
| 1988–1992 | 5.4             | 10.0             | 100.9 | 9.2             | 32.1             | 90.4  | 3.0             | 5.9              | 112.7 | 5.2             | 17.7             | 99.2  |
| 1993–1997 | 5.0             | 10.4             | 91.7  | 11.6            | 34.8             | 86.4  | 2.0             | 4.6              | 88.5  | 5.2             | 15.1             | 94.7  |
| 1998–2002 | 8.0             | 17.7             | 112.3 | 22.8            | 60.7             | 95.6  | 4.4             | 9.5              | 135.0 | 7.4             | 18.6             | 99.0  |
| 2003–2007 | 7.6             | 19.2             | 109.9 | 21.4            | 52.1             | 90.2  | 3.0             | 8.5              | 94.4  | 5.8             | 14.3             | 85.6  |
| 2008–2012 | 6.4             | 19.5             | 91.7  | 16.8            | 41.9             | 86.2  | 3.2             | 9.7              | 99.8  | 5.8             | 14.1             | 94.3  |
|           | 25–34           |                  |       | 65–74           |                  |       | 25–34           |                  |       | 65–74           |                  |       |
| 1983–1987 | 10.0            | 24.3             | 95.2  | 5.8             | 50.5             | 115.4 | 4.2             | 11.3             | 105.3 | 3.6             | 27.3             | 87.3  |
| 1988–1992 | 7.2             | 16.6             | 86.9  | 5.4             | 38.9             | 110.4 | 4.4             | 10.7             | 123.2 | 3.4             | 20.9             | 80.2  |
| 1993–1997 | 9.6             | 19.3             | 98.8  | 3.6             | 21.7             | 68.1  | 5.4             | 11.3             | 136.3 | 3.2             | 15.8             | 81.0  |
| 1998–2002 | 14.4            | 27.3             | 101.0 | 8.4             | 35.3             | 77.6  | 6.4             | 13.2             | 113.9 | 4.2             | 16.6             | 79.1  |
| 2003–2007 | 13.2            | 27.8             | 89.7  | 11.8            | 38.5             | 89.7  | 7.2             | 15.4             | 118.2 | 4.6             | 14.9             | 79.9  |
| 2008–2012 | 15.6            | 34.6             | 106.4 | 11.4            | 34.6             | 87.7  | 6.0             | 14.8             | 103.5 | 6.8             | 17.5             | 98.5  |
|           | 35–44           |                  |       | >74 y/o         |                  |       | 35–44           |                  |       | >74 y/o         |                  |       |
| 1983–1987 | 13.8            | 30.3             | 95.3  | 3.8             | 76.2             | 97.3  | 5.4             | 11.8             | 100.3 | 3.2             | 45.5             | 78.9  |
| 1988–1992 | 10.4            | 23.7             | 100.1 | 5.2             | 69.6             | 107.9 | 3.8             | 9.3              | 96.1  | 4.8             | 43.3             | 90.6  |
| 1993–1997 | 7.6             | 20.0             | 81.6  | 5.2             | 56.2             | 107.8 | 3.4             | 9.1              | 106.6 | 3.6             | 25.2             | 73.3  |
| 1998–2002 | 12.2            | 30.2             | 85.7  | 4.6             | 41.3             | 78.4  | 3.8             | 10.3             | 99.4  | 6.0             | 30.4             | 97.7  |
| 2003–2007 | 15.4            | 33.1             | 82.6  | 4.8             | 31.2             | 69.3  | 4.8             | 11.6             | 92.1  | 4.8             | 18.8             | 84.0  |
| 2008–2012 | 16.8            | 32.7             | 87.9  | 5.4             | 26.7             | 64.5  | 6.2             | 13.0             | 96.2  | 3.8             | 12.5             | 65.2  |

Secondary Medical Zone ID: 114

|           | Male            |                  |       |                 |                  |       | Female          |                  |       |                 |                  |       |
|-----------|-----------------|------------------|-------|-----------------|------------------|-------|-----------------|------------------|-------|-----------------|------------------|-------|
|           | Suicide         |                  |       | Suicide         |                  |       | Suicide         |                  |       | Suicide         |                  |       |
|           | Num<br>per year | Rate<br>/100,000 | × 100 | Num<br>per year | Rate<br>/100,000 | × 100 | Num<br>per year | Rate<br>/100,000 | × 100 | Num<br>per year | Rate<br>/100,000 | × 100 |
|           |                 |                  |       |                 |                  |       |                 |                  |       |                 |                  |       |
|           | Total (>10 y/o) |                  |       | 45–54           |                  |       | Total (>10 y/o) |                  |       | 45–54           |                  |       |
| 1983–1987 | 88.6            | 25.9             | 76.9  | 21.2            | 40.4             | 79.8  | 49.4            | 14.2             | 92.6  | 9.0             | 16.1             | 93.2  |
| 1988–1992 | 73.0            | 20.0             | 77.8  | 17.6            | 31.1             | 90.5  | 51.0            | 12.7             | 100.4 | 9.0             | 14.8             | 101.4 |
| 1993–1997 | 83.2            | 20.7             | 80.5  | 20.8            | 33.3             | 91.0  | 48.0            | 11.0             | 100.8 | 10.8            | 16.0             | 123.7 |
| 1998–2002 | 115.4           | 27.2             | 73.9  | 26.4            | 43.7             | 78.0  | 56.4            | 12.3             | 95.1  | 8.2             | 14.0             | 92.9  |
| 2003–2007 | 110.6           | 25.9             | 66.9  | 22.2            | 39.1             | 69.8  | 58.6            | 12.7             | 96.3  | 8.0             | 14.3             | 104.5 |
| 2008–2012 | 126.2           | 28.0             | 78.8  | 20.0            | 32.8             | 67.4  | 60.4            | 12.6             | 95.0  | 9.6             | 15.8             | 106.1 |
|           | 15–24           |                  |       | 55–64           |                  |       | 15–24           |                  |       | 55–64           |                  |       |
| 1983–1987 | 11.8            | 12.6             | 90.4  | 11.6            | 33.5             | 78.8  | 4.4             | 6.4              | 93.4  | 8.6             | 20.9             | 106.2 |
| 1988–1992 | 6.2             | 7.2              | 72.4  | 11.2            | 25.9             | 72.8  | 7.0             | 8.4              | 159.3 | 7.4             | 15.9             | 88.8  |
| 1993–1997 | 7.6             | 9.4              | 83.2  | 16.2            | 33.4             | 82.9  | 4.4             | 5.9              | 113.1 | 9.2             | 17.0             | 106.9 |
| 1998–2002 | 12.0            | 16.0             | 101.6 | 24.2            | 47.7             | 75.1  | 5.6             | 8.2              | 116.9 | 12.6            | 21.4             | 113.7 |
| 2003–2007 | 10.2            | 16.1             | 92.3  | 22.2            | 39.8             | 69.0  | 8.8             | 13.9             | 155.1 | 9.2             | 15.5             | 92.7  |
| 2008–2012 | 10.4            | 18.8             | 88.8  | 26.8            | 46.4             | 95.5  | 4.6             | 9.0              | 92.4  | 7.8             | 13.8             | 92.7  |
|           | 25–34           |                  |       | 65–74           |                  |       | 25–34           |                  |       | 65–74           |                  |       |
| 1983–1987 | 13.6            | 17.9             | 70.0  | 6.0             | 33.5             | 76.5  | 6.6             | 10.4             | 96.7  | 8.2             | 33.3             | 106.6 |
| 1988–1992 | 12.0            | 15.1             | 78.8  | 6.0             | 27.5             | 78.1  | 6.2             | 9.3              | 107.2 | 5.8             | 20.5             | 78.7  |
| 1993–1997 | 14.0            | 16.3             | 83.5  | 6.8             | 23.4             | 73.3  | 6.4             | 8.7              | 104.6 | 4.6             | 13.6             | 69.6  |
| 1998–2002 | 20.0            | 22.6             | 83.8  | 9.4             | 27.2             | 59.8  | 9.0             | 11.5             | 99.3  | 8.0             | 18.5             | 88.0  |
| 2003–2007 | 19.2            | 23.3             | 75.1  | 10.4            | 26.6             | 62.1  | 10.0            | 13.0             | 99.9  | 7.2             | 15.3             | 82.0  |
| 2008–2012 | 19.8            | 26.7             | 82.1  | 14.4            | 33.8             | 85.4  | 9.2             | 13.2             | 91.9  | 8.4             | 16.4             | 91.9  |
|           | 35–44           |                  |       | >74 y/o         |                  |       | 35–44           |                  |       | >74 y/o         |                  |       |
| 1983–1987 | 19.4            | 28.3             | 89.1  | 4.8             | 53.7             | 68.5  | 7.2             | 10.8             | 91.8  | 5.0             | 37.6             | 65.2  |
| 1988–1992 | 13.2            | 20.1             | 84.9  | 6.6             | 52.6             | 81.6  | 8.8             | 13.0             | 134.2 | 6.4             | 33.6             | 70.3  |
| 1993–1997 | 11.2            | 18.8             | 76.6  | 6.2             | 40.8             | 78.3  | 5.8             | 10.0             | 118.2 | 6.8             | 27.1             | 78.8  |
| 1998–2002 | 14.4            | 22.7             | 64.5  | 8.8             | 43.3             | 82.1  | 5.6             | 9.7              | 93.5  | 7.2             | 22.4             | 72.1  |
| 2003–2007 | 19.8            | 26.5             | 66.2  | 6.6             | 25.9             | 57.6  | 9.0             | 12.8             | 101.7 | 6.2             | 15.0             | 66.8  |
| 2008–2012 | 26.2            | 31.4             | 84.4  | 8.4             | 26.2             | 63.1  | 11.4            | 14.2             | 104.4 | 8.8             | 16.5             | 85.6  |

Secondary Medical Zone ID: 115

|                 | Male            |                  |       |                 |                  |       | Female          |                  |       |                 |                  |       |
|-----------------|-----------------|------------------|-------|-----------------|------------------|-------|-----------------|------------------|-------|-----------------|------------------|-------|
|                 | Suicide         |                  |       | Suicide         |                  |       | Suicide         |                  |       | Suicide         |                  |       |
|                 | Num<br>per year | Rate<br>/100,000 | × 100 | Num<br>per year | Rate<br>/100,000 | × 100 | Num<br>per year | Rate<br>/100,000 | × 100 | Num<br>per year | Rate<br>/100,000 | × 100 |
|                 |                 |                  |       |                 |                  |       |                 |                  |       |                 |                  |       |
| Total (>10 y/o) | 45–54           | Total (>10 y/o)  | 45–54 |                 |                  |       |                 |                  |       |                 |                  |       |
| 1983–1987       | 60.8            | 26.4             | 77.6  | 15.8            | 37.9             | 74.9  | 35.2            | 14.8             | 95.8  | 6.8             | 15.6             | 90.8  |
| 1988–1992       | 52.6            | 20.1             | 79.0  | 12.4            | 28.3             | 82.5  | 33.4            | 11.8             | 90.9  | 7.2             | 14.8             | 101.3 |
| 1993–1997       | 62.2            | 21.4             | 82.8  | 14.4            | 31.2             | 85.2  | 30.2            | 9.8              | 86.6  | 6.2             | 12.5             | 96.8  |
| 1998–2002       | 98.4            | 31.5             | 85.7  | 22.2            | 48.7             | 87.1  | 44.4            | 12.7             | 99.2  | 6.8             | 14.7             | 97.3  |
| 2003–2007       | 90.6            | 28.6             | 75.1  | 14.8            | 35.8             | 64.1  | 45.0            | 12.9             | 98.5  | 4.2             | 11.0             | 80.4  |
| 2008–2012       | 95.0            | 29.7             | 82.0  | 17.8            | 39.6             | 81.5  | 43.0            | 12.5             | 91.5  | 4.6             | 11.5             | 77.3  |
|                 | 15–24           |                  |       | 55–64           |                  |       | 15–24           |                  |       | 55–64           |                  |       |
| 1983–1987       | 7.0             | 12.8             | 91.9  | 9.2             | 35.6             | 83.7  | 4.0             | 7.7              | 113.0 | 4.4             | 17.1             | 86.7  |
| 1988–1992       | 6.6             | 10.7             | 107.6 | 8.8             | 25.7             | 72.3  | 3.4             | 6.0              | 112.9 | 7.2             | 19.1             | 107.1 |
| 1993–1997       | 5.4             | 10.2             | 90.2  | 14.0            | 34.7             | 86.2  | 2.8             | 5.4              | 103.5 | 5.4             | 13.2             | 82.9  |
| 1998–2002       | 9.6             | 19.0             | 120.3 | 20.4            | 49.3             | 77.6  | 2.8             | 6.5              | 92.0  | 10.0            | 20.6             | 109.2 |
| 2003–2007       | 7.8             | 17.9             | 102.6 | 19.8            | 44.8             | 77.5  | 5.4             | 12.0             | 133.4 | 8.4             | 16.9             | 100.7 |
| 2008–2012       | 8.0             | 20.4             | 96.2  | 20.6            | 46.1             | 95.0  | 3.4             | 9.0              | 92.6  | 7.6             | 15.8             | 106.0 |
|                 | 25–34           |                  |       | 65–74           |                  |       | 25–34           |                  |       | 65–74           |                  |       |
| 1983–1987       | 11.0            | 23.6             | 92.5  | 4.4             | 38.0             | 86.7  | 4.6             | 10.9             | 101.1 | 7.0             | 42.0             | 134.3 |
| 1988–1992       | 8.6             | 17.4             | 90.9  | 4.4             | 28.4             | 80.6  | 4.2             | 9.2              | 106.2 | 4.4             | 22.6             | 86.7  |
| 1993–1997       | 11.6            | 20.6             | 105.6 | 3.6             | 17.8             | 55.8  | 5.4             | 10.2             | 122.7 | 4.8             | 18.2             | 93.2  |
| 1998–2002       | 17.0            | 29.2             | 108.0 | 11.4            | 36.9             | 81.2  | 9.0             | 15.7             | 135.6 | 6.6             | 19.3             | 91.7  |
| 2003–2007       | 14.4            | 27.9             | 89.9  | 11.6            | 32.8             | 76.5  | 9.0             | 17.0             | 130.4 | 5.8             | 14.9             | 79.8  |
| 2008–2012       | 12.6            | 28.4             | 87.1  | 11.4            | 31.5             | 79.8  | 6.6             | 14.9             | 104.1 | 4.8             | 12.4             | 69.6  |
|                 | 35–44           |                  |       | >74 y/o         |                  |       | 35–44           |                  |       | >74 y/o         |                  |       |
| 1983–1987       | 10.8            | 23.0             | 72.1  | 2.6             | 53.9             | 68.8  | 4.6             | 9.8              | 83.1  | 3.8             | 46.4             | 80.3  |
| 1988–1992       | 8.8             | 19.1             | 80.4  | 3.0             | 41.0             | 63.5  | 3.2             | 7.8              | 80.3  | 3.6             | 28.4             | 59.3  |
| 1993–1997       | 8.6             | 20.2             | 82.5  | 4.6             | 44.4             | 85.2  | 3.4             | 8.3              | 97.8  | 2.2             | 14.5             | 42.3  |
| 1998–2002       | 12.6            | 28.0             | 79.4  | 5.0             | 37.0             | 70.2  | 4.2             | 9.9              | 95.6  | 5.0             | 21.6             | 69.6  |
| 2003–2007       | 16.0            | 31.1             | 77.5  | 6.2             | 30.6             | 68.0  | 6.2             | 12.6             | 99.7  | 5.6             | 17.7             | 79.0  |
| 2008–2012       | 17.4            | 31.3             | 84.0  | 7.0             | 26.4             | 63.6  | 9.2             | 15.9             | 117.4 | 6.4             | 15.4             | 80.1  |

Secondary Medical Zone ID: 116

|                 | Male            |                  |       |                 |                  |       | Female          |                  |       |                 |                  |       |
|-----------------|-----------------|------------------|-------|-----------------|------------------|-------|-----------------|------------------|-------|-----------------|------------------|-------|
|                 | Suicide         |                  |       | Suicide         |                  |       | Suicide         |                  |       | Suicide         |                  |       |
|                 | Num<br>per year | Rate<br>/100,000 | × 100 | Num<br>per year | Rate<br>/100,000 | × 100 | Num<br>per year | Rate<br>/100,000 | × 100 | Num<br>per year | Rate<br>/100,000 | × 100 |
|                 |                 |                  |       |                 |                  |       |                 |                  |       |                 |                  |       |
| Total (>10 y/o) | 45–54           | Total (>10 y/o)  | 45–54 |                 |                  |       |                 |                  |       |                 |                  |       |
| 1983–1987       | 7.6             | 36.1             | 129.5 | 1.4             | 53.5             | 105.7 | 4.8             | 16.9             | 130.2 | 0.6             | 18.5             | 107.4 |
| 1988–1992       | 7.0             | 28.0             | 140.1 | 1.8             | 45.2             | 131.7 | 2.6             | 12.9             | 103.3 | 0.2             | 14.2             | 97.0  |
| 1993–1997       | 8.6             | 29.6             | 153.0 | 1.8             | 42.8             | 117.0 | 3.0             | 11.4             | 116.9 | 0.6             | 14.5             | 111.9 |
| 1998–2002       | 7.8             | 38.5             | 120.4 | 3.2             | 73.5             | 131.3 | 1.4             | 12.2             | 90.8  | 0.2             | 14.6             | 97.0  |
| 2003–2007       | 10.8            | 42.3             | 151.3 | 3.4             | 86.4             | 154.6 | 2.0             | 12.4             | 100.5 | 0.2             | 13.5             | 98.6  |
| 2008–2012       | 5.8             | 34.1             | 104.8 | 0.8             | 46.0             | 94.6  | 2.6             | 13.1             | 107.8 | 0.4             | 15.9             | 106.9 |
|                 | 15–24           |                  |       | 55–64           |                  |       | 15–24           |                  |       | 55–64           |                  |       |
| 1983–1987       | 0.4             | 15.9             | 114.0 | 1.0             | 43.7             | 102.8 | 0.4             | 8.3              | 120.9 | 1.0             | 23.6             | 119.4 |
| 1988–1992       | 0.6             | 12.0             | 121.3 | 1.4             | 42.5             | 119.7 | 0.0             | 5.0              | 94.5  | 0.4             | 17.7             | 99.0  |
| 1993–1997       | 0.4             | 12.5             | 110.8 | 1.8             | 50.2             | 124.7 | 0.4             | 6.7              | 128.3 | 0.0             | 13.5             | 85.1  |
| 1998–2002       | 0.2             | 16.1             | 101.6 | 1.0             | 59.6             | 93.9  | 0.2             | 7.6              | 108.4 | 0.0             | 16.9             | 90.0  |
| 2003–2007       | 0.4             | 19.0             | 109.1 | 2.2             | 66.2             | 114.6 | 0.0             | 8.5              | 94.8  | 0.2             | 16.0             | 95.7  |
| 2008–2012       | 0.0             | 20.0             | 94.1  | 1.6             | 50.5             | 103.9 | 0.0             | 9.3              | 95.4  | 0.8             | 17.0             | 113.8 |
|                 | 25–34           |                  |       | 65–74           |                  |       | 25–34           |                  |       | 65–74           |                  |       |
| 1983–1987       | 1.0             | 29.3             | 114.7 | 1.4             | 57.9             | 132.2 | 0.6             | 13.1             | 121.6 | 0.6             | 31.8             | 101.8 |
| 1988–1992       | 0.6             | 21.2             | 111.0 | 0.2             | 30.1             | 85.5  | 0.0             | 8.0              | 91.8  | 0.4             | 24.4             | 93.6  |
| 1993–1997       | 0.8             | 23.1             | 118.1 | 1.2             | 41.2             | 129.1 | 0.2             | 8.7              | 104.1 | 0.8             | 23.6             | 121.1 |
| 1998–2002       | 0.2             | 25.1             | 92.8  | 0.8             | 45.7             | 100.6 | 0.0             | 10.8             | 93.3  | 0.4             | 20.8             | 99.2  |
| 2003–2007       | 0.2             | 28.2             | 91.0  | 2.2             | 61.0             | 142.1 | 0.0             | 12.0             | 92.4  | 0.2             | 17.3             | 93.0  |
| 2008–2012       | 0.2             | 30.8             | 94.6  | 1.2             | 44.2             | 111.9 | 0.2             | 14.5             | 101.1 | 0.6             | 19.3             | 108.4 |
|                 | 35–44           |                  |       | >74 y/o         |                  |       | 35–44           |                  |       | >74 y/o         |                  |       |
| 1983–1987       | 1.0             | 33.0             | 103.6 | 1.4             | 108.4            | 138.3 | 0.6             | 13.4             | 113.6 | 1.0             | 69.0             | 119.5 |
| 1988–1992       | 1.0             | 26.4             | 111.2 | 1.4             | 90.1             | 139.7 | 0.4             | 10.4             | 108.0 | 1.2             | 61.9             | 129.3 |
| 1993–1997       | 1.4             | 32.3             | 131.7 | 1.2             | 71.3             | 137.0 | 0.0             | 7.7              | 90.1  | 1.0             | 43.6             | 126.6 |
| 1998–2002       | 1.6             | 45.4             | 128.9 | 0.8             | 57.6             | 109.2 | 0.4             | 11.6             | 112.6 | 0.2             | 22.9             | 73.8  |
| 2003–2007       | 1.2             | 46.1             | 115.0 | 1.2             | 55.7             | 123.7 | 0.2             | 12.7             | 100.7 | 1.2             | 32.6             | 145.1 |
| 2008–2012       | 0.8             | 37.4             | 100.6 | 1.2             | 49.3             | 118.8 | 0.0             | 12.6             | 93.2  | 0.6             | 19.9             | 103.6 |

Secondary Medical Zone ID: 117

|           | Male            |                  |       |                 |                  |       | Female          |                  |       |                 |                  |       |
|-----------|-----------------|------------------|-------|-----------------|------------------|-------|-----------------|------------------|-------|-----------------|------------------|-------|
|           | Suicide         |                  |       | Suicide         |                  |       | Suicide         |                  |       | Suicide         |                  |       |
|           | Num<br>per year | Rate<br>/100,000 | × 100 | Num<br>per year | Rate<br>/100,000 | × 100 | Num<br>per year | Rate<br>/100,000 | × 100 | Num<br>per year | Rate<br>/100,000 | × 100 |
|           |                 |                  |       |                 |                  |       |                 |                  |       |                 |                  |       |
|           | Total (>10 y/o) |                  |       | 45–54           |                  |       | Total (>10 y/o) |                  |       | 45–54           |                  |       |
| 1983–1987 | 110.6           | 26.9             | 77.5  | 23.0            | 33.7             | 66.7  | 60.6            | 14.5             | 95.8  | 9.2             | 14.3             | 82.8  |
| 1988–1992 | 96.6            | 20.1             | 78.3  | 18.4            | 23.1             | 67.2  | 57.8            | 11.9             | 92.4  | 9.2             | 12.2             | 83.2  |
| 1993–1997 | 123.2           | 21.8             | 86.0  | 29.2            | 30.8             | 84.2  | 56.0            | 10.1             | 91.7  | 10.4            | 11.6             | 89.9  |
| 1998–2002 | 174.8           | 28.1             | 77.3  | 42.8            | 44.6             | 79.7  | 80.6            | 12.8             | 100.0 | 11.2            | 12.7             | 84.5  |
| 2003–2007 | 169.0           | 25.8             | 68.2  | 36.0            | 39.2             | 70.2  | 70.8            | 10.8             | 83.1  | 7.6             | 9.7              | 70.5  |
| 2008–2012 | 192.0           | 27.5             | 78.2  | 34.6            | 34.3             | 70.5  | 88.8            | 12.5             | 95.5  | 12.6            | 13.7             | 91.5  |
|           | 15–24           |                  |       | 55–64           |                  |       | 15–24           |                  |       | 55–64           |                  |       |
| 1983–1987 | 10.8            | 11.1             | 79.2  | 19.8            | 44.8             | 105.3 | 7.0             | 8.5              | 124.9 | 9.4             | 20.2             | 102.4 |
| 1988–1992 | 8.0             | 7.6              | 76.9  | 20.4            | 35.6             | 100.3 | 5.2             | 5.7              | 107.9 | 9.4             | 16.7             | 93.8  |
| 1993–1997 | 12.2            | 11.6             | 102.4 | 27.6            | 40.5             | 100.7 | 5.8             | 6.3              | 120.4 | 8.4             | 13.1             | 82.5  |
| 1998–2002 | 12.6            | 13.9             | 87.7  | 45.6            | 58.1             | 91.4  | 8.2             | 9.6              | 136.0 | 14.2            | 18.3             | 97.5  |
| 2003–2007 | 12.4            | 14.9             | 85.7  | 36.4            | 41.0             | 71.0  | 5.8             | 8.0              | 89.4  | 12.6            | 14.5             | 86.8  |
| 2008–2012 | 16.4            | 19.9             | 93.6  | 36.0            | 39.7             | 81.6  | 6.4             | 8.9              | 92.0  | 14.2            | 15.6             | 104.6 |
|           | 25–34           |                  |       | 65–74           |                  |       | 25–34           |                  |       | 65–74           |                  |       |
| 1983–1987 | 17.2            | 18.3             | 71.5  | 9.0             | 40.5             | 92.6  | 7.6             | 9.6              | 88.7  | 7.6             | 28.2             | 90.2  |
| 1988–1992 | 16.6            | 15.6             | 81.4  | 9.6             | 35.0             | 99.3  | 6.4             | 7.4              | 85.2  | 8.8             | 25.8             | 98.8  |
| 1993–1997 | 17.0            | 14.2             | 72.6  | 12.0            | 32.4             | 101.5 | 7.8             | 7.7              | 92.0  | 8.2             | 19.2             | 98.5  |
| 1998–2002 | 29.2            | 22.6             | 83.7  | 14.6            | 32.2             | 70.8  | 15.8            | 13.2             | 114.1 | 8.4             | 16.7             | 79.4  |
| 2003–2007 | 29.0            | 23.9             | 77.0  | 16.8            | 30.3             | 70.6  | 12.0            | 10.8             | 82.8  | 10.6            | 17.2             | 92.2  |
| 2008–2012 | 27.4            | 25.8             | 79.2  | 20.8            | 31.5             | 79.7  | 15.0            | 14.7             | 102.5 | 13.4            | 18.2             | 102.2 |
|           | 35–44           |                  |       | >74 y/o         |                  |       | 35–44           |                  |       | >74 y/o         |                  |       |
| 1983–1987 | 21.4            | 22.6             | 70.9  | 8.6             | 83.2             | 106.2 | 11.4            | 12.4             | 105.2 | 8.0             | 52.1             | 90.3  |
| 1988–1992 | 15.2            | 16.0             | 67.5  | 8.4             | 58.9             | 91.3  | 8.2             | 9.2              | 95.6  | 10.4            | 46.6             | 97.5  |
| 1993–1997 | 17.6            | 19.2             | 78.2  | 7.2             | 41.3             | 79.2  | 7.2             | 8.6              | 101.1 | 7.6             | 26.7             | 77.7  |
| 1998–2002 | 22.2            | 21.9             | 62.3  | 7.2             | 32.7             | 61.9  | 11.8            | 12.4             | 119.8 | 11.0            | 28.7             | 92.3  |
| 2003–2007 | 30.4            | 24.8             | 61.8  | 7.8             | 25.8             | 57.2  | 13.4            | 12.0             | 94.8  | 8.6             | 16.8             | 75.1  |
| 2008–2012 | 39.8            | 29.5             | 79.4  | 16.4            | 37.5             | 90.5  | 16.2            | 12.6             | 93.1  | 10.6            | 15.7             | 81.9  |

Secondary Medical Zone ID: 118

|           | Male            |          |       |          |          |       | Female          |          |       |          |          |       |
|-----------|-----------------|----------|-------|----------|----------|-------|-----------------|----------|-------|----------|----------|-------|
|           | Suicide         |          |       | Suicide  |          |       | Suicide         |          |       | Suicide  |          |       |
|           | Num             | Rate     | × 100 | Num      | Rate     | × 100 | Num             | Rate     | × 100 | Num      | Rate     | × 100 |
|           | per year        | /100,000 |       | per year | /100,000 |       | per year        | /100,000 |       | per year | /100,000 |       |
|           | Total (>10 y/o) |          |       | 45–54    |          |       | Total (>10 y/o) |          |       | 45–54    |          |       |
| 1983–1987 | 101.0           | 25.8     | 74.2  | 27.2     | 35.8     | 70.9  | 49.2            | 13.1     | 81.0  | 7.2      | 11.0     | 63.8  |
| 1988–1992 | 80.2            | 17.9     | 68.9  | 19.4     | 23.2     | 67.6  | 52.2            | 11.1     | 85.3  | 10.0     | 12.1     | 82.8  |
| 1993–1997 | 101.8           | 19.8     | 76.9  | 28.4     | 31.4     | 85.9  | 49.4            | 9.3      | 83.6  | 9.0      | 10.1     | 78.1  |
| 1998–2002 | 166.6           | 30.3     | 82.4  | 35.8     | 43.1     | 77.0  | 74.6            | 12.5     | 98.6  | 15.8     | 17.6     | 116.8 |
| 2003–2007 | 166.0           | 29.4     | 79.1  | 30.8     | 42.1     | 75.3  | 68.8            | 12.3     | 89.8  | 9.8      | 13.4     | 97.6  |
| 2008–2012 | 166.4           | 29.3     | 83.1  | 31.0     | 41.4     | 85.1  | 75.2            | 12.8     | 93.9  | 10.4     | 14.5     | 97.0  |
|           | 15–24           |          |       | 55–64    |          |       | 15–24           |          |       | 55–64    |          |       |
| 1983–1987 | 8.4             | 9.8      | 70.2  | 13.2     | 31.1     | 73.1  | 4.2             | 5.6      | 82.5  | 7.8      | 18.1     | 91.6  |
| 1988–1992 | 10.8            | 10.5     | 106.1 | 12.4     | 21.5     | 60.6  | 4.6             | 5.1      | 97.0  | 11.4     | 19.0     | 106.5 |
| 1993–1997 | 9.8             | 10.7     | 94.6  | 21.6     | 30.2     | 74.9  | 4.6             | 5.4      | 103.2 | 10.8     | 15.1     | 94.8  |
| 1998–2002 | 12.4            | 16.1     | 102.2 | 39.6     | 49.7     | 78.3  | 7.2             | 9.4      | 134.3 | 15.4     | 18.5     | 98.1  |
| 2003–2007 | 11.8            | 18.0     | 103.0 | 39.8     | 47.2     | 81.7  | 8.0             | 12.4     | 137.8 | 13.6     | 15.3     | 91.2  |
| 2008–2012 | 10.6            | 18.2     | 86.0  | 32.2     | 40.7     | 83.7  | 8.2             | 13.6     | 140.5 | 10.4     | 12.8     | 85.5  |
|           | 25–34           |          |       | 65–74    |          |       | 25–34           |          |       | 65–74    |          |       |
| 1983–1987 | 15.2            | 20.5     | 80.3  | 7.0      | 35.7     | 81.5  | 6.2             | 9.2      | 85.6  | 7.4      | 29.1     | 93.2  |
| 1988–1992 | 6.6             | 8.9      | 46.7  | 9.2      | 33.8     | 95.9  | 5.2             | 7.3      | 84.6  | 8.0      | 24.5     | 94.0  |
| 1993–1997 | 12.4            | 13.8     | 70.8  | 8.2      | 22.2     | 69.6  | 7.8             | 9.1      | 109.8 | 5.2      | 13.2     | 67.6  |
| 1998–2002 | 22.8            | 23.3     | 86.4  | 18.8     | 36.5     | 80.2  | 10.4            | 11.5     | 99.0  | 10.0     | 18.4     | 87.7  |
| 2003–2007 | 24.2            | 27.0     | 87.1  | 23.0     | 36.1     | 84.0  | 12.4            | 14.2     | 109.2 | 9.8      | 14.9     | 80.1  |
| 2008–2012 | 20.6            | 27.7     | 85.2  | 24.8     | 34.8     | 88.0  | 9.4             | 13.2     | 92.1  | 14.8     | 18.4     | 103.3 |
|           | 35–44           |          |       | >74 y/o  |          |       | 35–44           |          |       | >74 y/o  |          |       |
| 1983–1987 | 21.0            | 22.9     | 72.0  | 8.4      | 90.6     | 115.7 | 8.4             | 9.3      | 78.5  | 8.0      | 57.5     | 99.7  |
| 1988–1992 | 15.2            | 17.5     | 73.7  | 6.6      | 51.8     | 80.4  | 7.6             | 8.8      | 91.0  | 5.4      | 27.4     | 57.3  |
| 1993–1997 | 13.0            | 17.2     | 70.3  | 7.2      | 43.1     | 82.7  | 4.4             | 6.4      | 75.0  | 7.6      | 27.2     | 79.1  |
| 1998–2002 | 26.6            | 33.7     | 95.7  | 10.2     | 44.0     | 83.4  | 6.0             | 8.6      | 83.2  | 9.8      | 26.0     | 83.8  |
| 2003–2007 | 25.8            | 28.9     | 72.2  | 10.6     | 31.7     | 70.4  | 9.0             | 11.1     | 87.6  | 6.0      | 12.2     | 54.4  |
| 2008–2012 | 32.8            | 32.5     | 87.3  | 14.4     | 30.9     | 74.4  | 13.6            | 14.0     | 103.0 | 8.4      | 12.5     | 65.1  |

Secondary Medical Zone ID: 119

|                 | Male            |                  |       |                 |                  |       | Female          |                  |       |                 |                  |       |
|-----------------|-----------------|------------------|-------|-----------------|------------------|-------|-----------------|------------------|-------|-----------------|------------------|-------|
|                 | Suicide         |                  |       | Suicide         |                  |       | Suicide         |                  |       | Suicide         |                  |       |
|                 | Num<br>per year | Rate<br>/100,000 | × 100 | Num<br>per year | Rate<br>/100,000 | × 100 | Num<br>per year | Rate<br>/100,000 | × 100 | Num<br>per year | Rate<br>/100,000 | × 100 |
|                 |                 |                  |       |                 |                  |       |                 |                  |       |                 |                  |       |
| Total (>10 y/o) | 45–54           | Total (>10 y/o)  | 45–54 |                 |                  |       |                 |                  |       |                 |                  |       |
| 1983–1987       | 102.0           | 30.1             | 89.9  | 29.2            | 48.1             | 95.2  | 47.8            | 14.0             | 90.4  | 8.0             | 14.2             | 82.5  |
| 1988–1992       | 84.2            | 22.0             | 88.5  | 18.2            | 27.6             | 80.5  | 52.8            | 13.0             | 102.9 | 10.2            | 15.3             | 104.6 |
| 1993–1997       | 107.0           | 25.1             | 100.4 | 26.4            | 35.6             | 97.2  | 46.4            | 10.6             | 97.3  | 7.2             | 10.6             | 82.4  |
| 1998–2002       | 154.6           | 34.6             | 96.3  | 35.6            | 51.1             | 91.3  | 60.6            | 13.0             | 102.3 | 11.8            | 16.9             | 112.5 |
| 2003–2007       | 145.8           | 32.0             | 88.3  | 30.6            | 50.4             | 90.1  | 63.4            | 13.4             | 106.4 | 6.0             | 11.2             | 81.4  |
| 2008–2012       | 151.0           | 33.6             | 97.3  | 30.0            | 49.2             | 101.3 | 62.2            | 14.0             | 103.3 | 11.0            | 18.5             | 123.9 |
|                 | 15–24           |                  |       | 55–64           |                  |       | 15–24           |                  |       | 55–64           |                  |       |
| 1983–1987       | 7.4             | 11.7             | 83.8  | 16.8            | 42.3             | 99.5  | 5.2             | 8.3              | 122.2 | 7.8             | 19.2             | 97.1  |
| 1988–1992       | 7.2             | 9.9              | 99.7  | 18.6            | 36.3             | 102.1 | 5.4             | 7.5              | 141.3 | 7.0             | 14.7             | 82.2  |
| 1993–1997       | 9.8             | 13.8             | 122.2 | 21.8            | 37.9             | 94.2  | 6.4             | 9.0              | 171.8 | 8.8             | 15.5             | 97.4  |
| 1998–2002       | 10.0            | 17.6             | 111.4 | 41.4            | 65.1             | 102.4 | 3.4             | 6.6              | 94.1  | 8.8             | 15.1             | 80.0  |
| 2003–2007       | 7.2             | 15.7             | 90.0  | 43.4            | 61.8             | 107.1 | 5.2             | 10.8             | 120.5 | 13.4            | 18.9             | 113.1 |
| 2008–2012       | 7.8             | 18.8             | 88.8  | 38.0            | 55.2             | 113.6 | 6.2             | 13.9             | 143.0 | 11.4            | 16.9             | 113.0 |
|                 | 25–34           |                  |       | 65–74           |                  |       | 25–34           |                  |       | 65–74           |                  |       |
| 1983–1987       | 13.2            | 21.3             | 83.2  | 8.0             | 42.0             | 95.9  | 7.2             | 12.0             | 111.1 | 4.8             | 21.8             | 69.7  |
| 1988–1992       | 12.8            | 19.4             | 101.7 | 5.8             | 25.7             | 73.1  | 6.0             | 9.8              | 113.1 | 6.6             | 22.6             | 86.5  |
| 1993–1997       | 14.6            | 20.5             | 104.8 | 12.4            | 36.1             | 113.2 | 6.6             | 9.9              | 119.3 | 6.4             | 17.4             | 89.1  |
| 1998–2002       | 18.8            | 25.9             | 95.8  | 18.0            | 42.0             | 92.4  | 10.6            | 14.8             | 127.5 | 9.0             | 19.8             | 94.1  |
| 2003–2007       | 16.0            | 24.8             | 79.8  | 20.2            | 40.7             | 95.0  | 12.2            | 17.8             | 137.1 | 9.0             | 17.3             | 92.9  |
| 2008–2012       | 15.6            | 28.4             | 87.1  | 19.8            | 36.7             | 92.9  | 7.6             | 14.2             | 99.2  | 7.0             | 13.3             | 74.6  |
|                 | 35–44           |                  |       | >74 y/o         |                  |       | 35–44           |                  |       | >74 y/o         |                  |       |
| 1983–1987       | 19.2            | 25.4             | 79.9  | 7.8             | 84.4             | 107.8 | 7.4             | 10.3             | 87.6  | 7.4             | 52.7             | 91.4  |
| 1988–1992       | 14.2            | 19.6             | 82.5  | 7.2             | 60.7             | 94.0  | 8.4             | 11.4             | 118.6 | 9.0             | 47.0             | 98.3  |
| 1993–1997       | 15.4            | 24.3             | 99.2  | 6.6             | 45.3             | 87.1  | 3.6             | 6.6              | 77.9  | 7.4             | 30.6             | 89.0  |
| 1998–2002       | 21.6            | 34.9             | 99.2  | 9.2             | 46.7             | 88.5  | 7.0             | 11.8             | 113.9 | 9.8             | 30.8             | 99.3  |
| 2003–2007       | 19.0            | 28.5             | 71.1  | 9.2             | 33.9             | 75.2  | 8.0             | 12.6             | 99.4  | 9.4             | 22.4             | 99.6  |
| 2008–2012       | 26.4            | 35.7             | 95.9  | 12.6            | 35.0             | 84.4  | 10.0            | 14.2             | 104.9 | 9.0             | 17.1             | 88.7  |



Secondary Medical Zone ID: 120

|                 | Male            |                  |       |                 |                  |       | Female          |                  |       |                 |                  |       |
|-----------------|-----------------|------------------|-------|-----------------|------------------|-------|-----------------|------------------|-------|-----------------|------------------|-------|
|                 | Suicide         |                  |       | Suicide         |                  |       | Suicide         |                  |       | Suicide         |                  |       |
|                 | Num<br>per year | Rate<br>/100,000 | × 100 | Num<br>per year | Rate<br>/100,000 | × 100 | Num<br>per year | Rate<br>/100,000 | × 100 | Num<br>per year | Rate<br>/100,000 | × 100 |
|                 |                 |                  |       |                 |                  |       |                 |                  |       |                 |                  |       |
| Total (>10 y/o) | 45–54           | Total (>10 y/o)  | 45–54 |                 |                  |       |                 |                  |       |                 |                  |       |
| 1983–1987       | 50.0            | 25.3             | 69.8  | 14.8            | 41.3             | 81.7  | 25.2            | 13.3             | 83.5  | 5.6             | 16.2             | 94.1  |
| 1988–1992       | 49.0            | 19.7             | 76.2  | 13.2            | 30.9             | 89.9  | 27.8            | 11.4             | 89.1  | 4.8             | 12.2             | 83.6  |
| 1993–1997       | 62.2            | 21.4             | 82.5  | 16.0            | 33.0             | 90.3  | 26.4            | 9.4              | 85.3  | 5.8             | 12.1             | 93.9  |
| 1998–2002       | 93.8            | 29.3             | 78.6  | 18.6            | 40.0             | 71.4  | 37.6            | 11.7             | 90.4  | 7.4             | 15.3             | 101.5 |
| 2003–2007       | 88.4            | 26.1             | 67.1  | 18.4            | 40.1             | 71.7  | 41.0            | 11.7             | 90.3  | 3.8             | 10.0             | 73.2  |
| 2008–2012       | 106.8           | 29.2             | 82.0  | 18.2            | 35.8             | 73.7  | 47.8            | 12.2             | 95.9  | 7.2             | 14.8             | 99.5  |
|                 | 15–24           |                  |       | 55–64           |                  |       | 15–24           |                  |       | 55–64           |                  |       |
| 1983–1987       | 4.4             | 8.7              | 62.5  | 5.4             | 30.3             | 71.3  | 2.4             | 5.8              | 85.0  | 3.0             | 16.5             | 83.8  |
| 1988–1992       | 6.0             | 9.2              | 93.0  | 6.0             | 23.5             | 66.1  | 3.4             | 6.1              | 114.7 | 6.8             | 22.3             | 124.8 |
| 1993–1997       | 8.4             | 12.9             | 113.9 | 11.0            | 32.7             | 81.3  | 3.2             | 5.8              | 111.8 | 3.4             | 11.4             | 71.7  |
| 1998–2002       | 7.8             | 14.4             | 91.0  | 22.8            | 56.9             | 89.6  | 3.6             | 7.4              | 105.7 | 8.2             | 19.6             | 104.0 |
| 2003–2007       | 5.2             | 11.9             | 68.2  | 21.4            | 47.5             | 82.2  | 4.0             | 9.1              | 100.9 | 6.4             | 14.5             | 86.3  |
| 2008–2012       | 9.4             | 20.5             | 96.6  | 21.2            | 46.1             | 94.9  | 1.2             | 4.5              | 46.6  | 8.4             | 16.9             | 113.1 |
|                 | 25–34           |                  |       | 65–74           |                  |       | 25–34           |                  |       | 65–74           |                  |       |
| 1983–1987       | 8.6             | 17.7             | 69.3  | 4.6             | 47.6             | 108.6 | 3.0             | 7.7              | 71.9  | 2.8             | 26.9             | 86.0  |
| 1988–1992       | 8.8             | 14.7             | 77.0  | 2.6             | 25.2             | 71.4  | 3.8             | 7.8              | 89.8  | 2.0             | 16.9             | 64.9  |
| 1993–1997       | 10.0            | 14.5             | 74.0  | 4.8             | 28.2             | 88.3  | 5.4             | 8.9              | 106.7 | 3.8             | 19.5             | 100.1 |
| 1998–2002       | 15.2            | 20.6             | 76.3  | 9.2             | 39.3             | 86.4  | 4.8             | 8.2              | 70.7  | 4.6             | 18.6             | 88.5  |
| 2003–2007       | 12.8            | 18.8             | 60.7  | 9.0             | 31.7             | 73.9  | 9.4             | 14.0             | 107.6 | 6.2             | 18.8             | 100.9 |
| 2008–2012       | 17.6            | 28.1             | 86.4  | 11.6            | 34.2             | 86.5  | 8.2             | 13.9             | 96.9  | 6.4             | 16.8             | 94.3  |
|                 | 35–44           |                  |       | >74 y/o         |                  |       | 35–44           |                  |       | >74 y/o         |                  |       |
| 1983–1987       | 9.4             | 19.8             | 62.1  | 2.6             | 68.1             | 87.0  | 5.0             | 10.6             | 89.4  | 3.0             | 50.9             | 88.3  |
| 1988–1992       | 9.4             | 18.5             | 78.2  | 3.0             | 53.6             | 83.1  | 3.6             | 8.0              | 83.4  | 3.4             | 38.7             | 80.8  |
| 1993–1997       | 6.8             | 15.0             | 61.1  | 5.2             | 63.3             | 121.6 | 2.4             | 6.2              | 73.2  | 2.4             | 21.7             | 63.2  |
| 1998–2002       | 13.6            | 25.1             | 71.2  | 6.0             | 54.9             | 104.1 | 5.0             | 10.2             | 98.7  | 4.0             | 24.5             | 79.1  |
| 2003–2007       | 15.8            | 24.2             | 60.3  | 5.4             | 35.8             | 79.6  | 7.8             | 12.9             | 102.0 | 3.2             | 14.4             | 64.2  |
| 2008–2012       | 21.0            | 29.2             | 78.4  | 7.0             | 32.8             | 79.0  | 10.4            | 14.6             | 107.7 | 6.0             | 17.9             | 93.1  |

Secondary Medical Zone ID: 121

|                 | Male            |                  |       |                 |                  |       | Female          |                  |       |                 |                  |       |
|-----------------|-----------------|------------------|-------|-----------------|------------------|-------|-----------------|------------------|-------|-----------------|------------------|-------|
|                 | Suicide         |                  |       | Suicide         |                  |       | Suicide         |                  |       | Suicide         |                  |       |
|                 | Num<br>per year | Rate<br>/100,000 | × 100 | Num<br>per year | Rate<br>/100,000 | × 100 | Num<br>per year | Rate<br>/100,000 | × 100 | Num<br>per year | Rate<br>/100,000 | × 100 |
|                 |                 |                  |       |                 |                  |       |                 |                  |       |                 |                  |       |
| Total (>10 y/o) | 45–54           | Total (>10 y/o)  | 45–54 |                 |                  |       |                 |                  |       |                 |                  |       |
| 1983–1987       | 71.8            | 32.7             | 99.5  | 14.2            | 42.0             | 83.0  | 29.8            | 14.8             | 96.4  | 5.4             | 16.6             | 96.4  |
| 1988–1992       | 58.8            | 24.7             | 99.4  | 15.4            | 38.9             | 113.3 | 23.2            | 11.1             | 82.5  | 3.8             | 12.4             | 84.6  |
| 1993–1997       | 64.6            | 25.2             | 100.5 | 16.2            | 38.0             | 103.9 | 24.6            | 10.4             | 94.3  | 4.2             | 12.1             | 94.1  |
| 1998–2002       | 99.8            | 36.2             | 103.1 | 24.4            | 59.2             | 105.8 | 31.6            | 12.6             | 98.0  | 6.4             | 17.6             | 116.9 |
| 2003–2007       | 92.0            | 32.5             | 89.1  | 19.0            | 51.3             | 91.7  | 33.0            | 12.2             | 98.8  | 3.8             | 13.0             | 94.9  |
| 2008–2012       | 100.8           | 33.1             | 98.6  | 14.8            | 39.6             | 81.5  | 37.8            | 13.5             | 104.7 | 6.4             | 18.5             | 123.9 |
|                 | 15–24           |                  |       | 55–64           |                  |       | 15–24           |                  |       | 55–64           |                  |       |
| 1983–1987       | 8.2             | 17.0             | 122.0 | 14.0            | 55.5             | 130.7 | 2.4             | 6.5              | 95.7  | 4.8             | 19.3             | 97.8  |
| 1988–1992       | 3.4             | 7.9              | 80.1  | 10.2            | 35.7             | 100.6 | 1.2             | 3.8              | 72.9  | 3.4             | 13.9             | 77.6  |
| 1993–1997       | 4.4             | 10.8             | 95.4  | 13.6            | 42.8             | 106.3 | 2.4             | 6.2              | 119.2 | 3.4             | 12.6             | 79.5  |
| 1998–2002       | 5.2             | 15.4             | 97.4  | 26.8            | 75.6             | 119.0 | 1.8             | 6.5              | 91.9  | 6.8             | 20.7             | 110.0 |
| 2003–2007       | 3.8             | 14.1             | 80.5  | 26.2            | 66.8             | 115.7 | 2.4             | 8.9              | 99.5  | 6.4             | 18.2             | 108.8 |
| 2008–2012       | 6.6             | 22.0             | 103.6 | 22.6            | 57.2             | 117.7 | 3.0             | 11.0             | 113.3 | 5.0             | 15.1             | 101.0 |
|                 | 25–34           |                  |       | 65–74           |                  |       | 25–34           |                  |       | 65–74           |                  |       |
| 1983–1987       | 10.2            | 21.6             | 84.5  | 8.2             | 57.4             | 131.0 | 5.0             | 12.9             | 119.8 | 4.4             | 29.1             | 93.2  |
| 1988–1992       | 7.8             | 15.9             | 83.3  | 4.8             | 33.1             | 93.8  | 2.8             | 7.9              | 90.6  | 4.6             | 25.2             | 96.6  |
| 1993–1997       | 10.0            | 18.7             | 95.6  | 5.4             | 29.9             | 93.7  | 4.0             | 9.3              | 112.2 | 4.0             | 18.9             | 96.9  |
| 1998–2002       | 14.6            | 25.8             | 95.5  | 10.8            | 48.3             | 106.1 | 4.2             | 10.0             | 86.5  | 4.4             | 18.7             | 89.2  |
| 2003–2007       | 12.4            | 22.5             | 72.5  | 12.2            | 48.1             | 112.2 | 4.0             | 9.7              | 74.7  | 5.6             | 20.3             | 108.8 |
| 2008–2012       | 13.6            | 26.2             | 80.5  | 13.2            | 45.7             | 115.8 | 5.6             | 12.9             | 90.2  | 5.4             | 18.7             | 104.8 |
|                 | 35–44           |                  |       | >74 y/o         |                  |       | 35–44           |                  |       | >74 y/o         |                  |       |
| 1983–1987       | 12.6            | 27.8             | 87.2  | 4.2             | 79.3             | 101.3 | 3.6             | 10.1             | 85.4  | 4.2             | 55.7             | 96.6  |
| 1988–1992       | 11.0            | 24.2             | 102.1 | 6.0             | 76.3             | 118.2 | 3.4             | 9.4              | 97.7  | 4.0             | 39.5             | 82.5  |
| 1993–1997       | 10.4            | 25.8             | 105.2 | 4.4             | 48.5             | 93.2  | 3.4             | 9.9              | 117.0 | 3.0             | 23.5             | 68.4  |
| 1998–2002       | 11.2            | 28.7             | 81.4  | 6.8             | 57.7             | 109.4 | 3.8             | 11.3             | 109.8 | 4.0             | 23.7             | 76.3  |
| 2003–2007       | 12.6            | 27.3             | 68.2  | 5.4             | 38.4             | 85.3  | 4.4             | 11.8             | 93.5  | 6.4             | 26.9             | 119.9 |
| 2008–2012       | 19.2            | 34.1             | 91.5  | 10.8            | 56.0             | 134.9 | 6.0             | 12.9             | 95.2  | 6.2             | 21.1             | 109.9 |

Secondary Medical Zone ID: 122

|                 | Male            |                  |       |                 |                  |       | Female          |                  |       |                 |                  |       |
|-----------------|-----------------|------------------|-------|-----------------|------------------|-------|-----------------|------------------|-------|-----------------|------------------|-------|
|                 | Suicide         |                  |       | Suicide         |                  |       | Suicide         |                  |       | Suicide         |                  |       |
|                 | Num<br>per year | Rate<br>/100,000 | × 100 | Num<br>per year | Rate<br>/100,000 | × 100 | Num<br>per year | Rate<br>/100,000 | × 100 | Num<br>per year | Rate<br>/100,000 | × 100 |
|                 |                 |                  |       |                 |                  |       |                 |                  |       |                 |                  |       |
| Total (>10 y/o) | 45–54           | Total (>10 y/o)  | 45–54 |                 |                  |       |                 |                  |       |                 |                  |       |
| 1983–1987       | 80.4            | 27.7             | 82.6  | 21.2            | 41.4             | 81.8  | 39.0            | 12.6             | 78.9  | 6.6             | 13.5             | 78.1  |
| 1988–1992       | 66.4            | 20.8             | 81.8  | 11.6            | 22.2             | 64.7  | 42.4            | 11.8             | 89.2  | 6.6             | 12.2             | 83.3  |
| 1993–1997       | 71.8            | 21.5             | 81.4  | 15.2            | 27.2             | 74.2  | 36.2            | 9.6              | 84.0  | 4.4             | 8.4              | 65.4  |
| 1998–2002       | 120.8           | 33.6             | 92.2  | 29.6            | 54.7             | 97.7  | 54.2            | 13.8             | 103.1 | 9.6             | 16.6             | 110.3 |
| 2003–2007       | 108.4           | 31.6             | 82.7  | 19.0            | 42.7             | 76.4  | 45.0            | 12.0             | 90.1  | 7.0             | 14.9             | 109.0 |
| 2008–2012       | 101.2           | 30.7             | 84.1  | 18.8            | 43.2             | 88.9  | 49.6            | 13.2             | 98.5  | 7.2             | 16.4             | 109.7 |
|                 | 15–24           |                  |       | 55–64           |                  |       | 15–24           |                  |       | 55–64           |                  |       |
| 1983–1987       | 6.8             | 12.7             | 91.0  | 14.8            | 40.8             | 96.1  | 3.6             | 7.0              | 102.2 | 5.2             | 14.3             | 72.7  |
| 1988–1992       | 6.6             | 10.1             | 102.1 | 14.6            | 32.9             | 92.7  | 2.0             | 4.0              | 75.9  | 7.2             | 15.9             | 89.2  |
| 1993–1997       | 8.2             | 13.4             | 118.1 | 13.8            | 29.4             | 73.0  | 4.0             | 6.9              | 133.2 | 7.4             | 14.7             | 92.3  |
| 1998–2002       | 8.0             | 16.9             | 106.9 | 30.2            | 57.4             | 90.3  | 4.8             | 10.1             | 143.0 | 10.6            | 18.7             | 99.4  |
| 2003–2007       | 8.8             | 21.0             | 120.3 | 24.8            | 45.2             | 78.3  | 3.8             | 10.4             | 116.0 | 8.0             | 14.0             | 83.5  |
| 2008–2012       | 7.6             | 21.5             | 101.5 | 20.6            | 41.0             | 84.3  | 2.2             | 7.9              | 81.3  | 8.6             | 15.3             | 102.3 |
|                 | 25–34           |                  |       | 65–74           |                  |       | 25–34           |                  |       | 65–74           |                  |       |
| 1983–1987       | 11.6            | 25.9             | 101.5 | 4.2             | 24.0             | 54.9  | 3.4             | 8.7              | 81.2  | 6.4             | 25.2             | 80.6  |
| 1988–1992       | 10.0            | 20.7             | 108.4 | 6.8             | 29.0             | 82.2  | 6.4             | 13.4             | 154.6 | 6.2             | 20.5             | 78.5  |
| 1993–1997       | 8.2             | 16.5             | 84.5  | 7.4             | 24.7             | 77.3  | 3.4             | 7.7              | 93.1  | 5.4             | 15.1             | 77.6  |
| 1998–2002       | 15.8            | 28.7             | 106.2 | 13.0            | 35.1             | 77.3  | 6.4             | 12.6             | 108.6 | 6.6             | 16.1             | 76.7  |
| 2003–2007       | 12.0            | 25.3             | 81.6  | 16.6            | 38.4             | 89.4  | 6.2             | 13.4             | 102.8 | 6.4             | 14.2             | 76.2  |
| 2008–2012       | 11.2            | 29.2             | 89.6  | 13.0            | 28.9             | 73.2  | 6.8             | 17.1             | 119.5 | 9.2             | 17.2             | 96.4  |
|                 | 35–44           |                  |       | >74 y/o         |                  |       | 35–44           |                  |       | >74 y/o         |                  |       |
| 1983–1987       | 13.2            | 22.9             | 71.9  | 8.4             | 80.2             | 102.4 | 6.6             | 10.6             | 89.8  | 7.2             | 45.6             | 79.0  |
| 1988–1992       | 10.6            | 19.7             | 83.1  | 6.2             | 46.7             | 72.4  | 4.2             | 8.1              | 83.9  | 9.6             | 43.1             | 90.1  |
| 1993–1997       | 12.6            | 26.6             | 108.6 | 6.0             | 37.2             | 71.5  | 4.4             | 9.4              | 110.8 | 7.2             | 26.2             | 76.2  |
| 1998–2002       | 13.8            | 31.0             | 88.0  | 10.2            | 49.0             | 93.0  | 7.6             | 15.8             | 152.4 | 8.4             | 24.4             | 78.7  |
| 2003–2007       | 19.4            | 38.9             | 97.2  | 7.6             | 29.6             | 65.6  | 5.6             | 12.1             | 96.0  | 8.0             | 18.3             | 81.8  |
| 2008–2012       | 19.6            | 36.0             | 96.7  | 10.0            | 29.8             | 71.8  | 7.2             | 13.6             | 100.6 | 8.2             | 15.4             | 80.2  |

Secondary Medical Zone ID: 123

|           | Male            |                  |       |                 |                  |       | Female          |                  |       |                 |                  |       |
|-----------|-----------------|------------------|-------|-----------------|------------------|-------|-----------------|------------------|-------|-----------------|------------------|-------|
|           | Suicide         |                  |       | Suicide         |                  |       | Suicide         |                  |       | Suicide         |                  |       |
|           | Num<br>per year | Rate<br>/100,000 | × 100 | Num<br>per year | Rate<br>/100,000 | × 100 | Num<br>per year | Rate<br>/100,000 | × 100 | Num<br>per year | Rate<br>/100,000 | × 100 |
|           |                 |                  |       |                 |                  |       |                 |                  |       |                 |                  |       |
|           | Total (>10 y/o) |                  |       | 45–54           |                  |       | Total (>10 y/o) |                  |       | 45–54           |                  |       |
| 1983–1987 | 59.2            | 27.9             | 83.3  | 16.8            | 44.2             | 87.3  | 25.4            | 12.8             | 78.6  | 4.0             | 12.7             | 73.8  |
| 1988–1992 | 49.0            | 20.4             | 79.8  | 11.2            | 26.0             | 75.7  | 29.2            | 11.6             | 88.4  | 5.8             | 13.5             | 92.5  |
| 1993–1997 | 52.6            | 19.7             | 74.6  | 14.0            | 29.3             | 80.1  | 25.8            | 9.3              | 81.3  | 5.0             | 10.6             | 82.4  |
| 1998–2002 | 79.0            | 27.5             | 72.5  | 18.2            | 40.7             | 72.8  | 36.2            | 11.9             | 88.9  | 7.0             | 14.6             | 97.1  |
| 2003–2007 | 92.8            | 30.1             | 79.7  | 18.2            | 44.7             | 79.9  | 38.2            | 11.7             | 90.9  | 3.8             | 10.6             | 77.1  |
| 2008–2012 | 85.6            | 27.7             | 77.2  | 14.2            | 34.6             | 71.3  | 37.2            | 11.3             | 85.7  | 5.6             | 13.9             | 93.3  |
|           | 15–24           |                  |       | 55–64           |                  |       | 15–24           |                  |       | 55–64           |                  |       |
| 1983–1987 | 7.8             | 16.0             | 114.9 | 6.6             | 32.7             | 76.9  | 1.8             | 5.3              | 77.9  | 4.2             | 18.6             | 94.4  |
| 1988–1992 | 5.2             | 9.7              | 97.5  | 5.6             | 21.4             | 60.2  | 2.8             | 5.7              | 108.3 | 5.6             | 18.6             | 103.9 |
| 1993–1997 | 4.0             | 8.6              | 76.2  | 11.6            | 32.6             | 80.9  | 2.0             | 4.5              | 87.0  | 4.2             | 12.6             | 79.3  |
| 1998–2002 | 6.2             | 14.4             | 91.0  | 19.0            | 46.6             | 73.3  | 2.8             | 6.9              | 98.6  | 7.6             | 17.8             | 94.5  |
| 2003–2007 | 4.2             | 12.8             | 73.1  | 21.2            | 46.5             | 80.5  | 3.8             | 10.3             | 114.0 | 6.8             | 14.6             | 87.0  |
| 2008–2012 | 6.2             | 18.4             | 86.6  | 15.4            | 36.8             | 75.7  | 2.8             | 8.8              | 91.1  | 5.6             | 12.7             | 84.9  |
|           | 25–34           |                  |       | 65–74           |                  |       | 25–34           |                  |       | 65–74           |                  |       |
| 1983–1987 | 7.2             | 19.8             | 77.6  | 4.0             | 37.3             | 85.3  | 2.8             | 8.6              | 80.1  | 2.6             | 21.0             | 67.1  |
| 1988–1992 | 8.0             | 18.5             | 96.7  | 5.2             | 35.8             | 101.5 | 4.2             | 10.2             | 118.1 | 3.2             | 19.3             | 74.0  |
| 1993–1997 | 9.2             | 18.2             | 93.2  | 2.6             | 17.0             | 53.2  | 3.2             | 7.5              | 90.1  | 4.8             | 20.6             | 105.8 |
| 1998–2002 | 11.8            | 22.3             | 82.6  | 6.6             | 29.0             | 63.7  | 5.6             | 11.3             | 97.4  | 3.6             | 14.7             | 69.9  |
| 2003–2007 | 17.6            | 33.3             | 107.5 | 10.4            | 33.3             | 77.6  | 5.6             | 11.9             | 91.3  | 7.0             | 19.6             | 105.4 |
| 2008–2012 | 9.4             | 23.4             | 71.8  | 11.6            | 31.9             | 80.7  | 4.0             | 10.9             | 76.0  | 6.2             | 15.6             | 87.7  |
|           | 35–44           |                  |       | >74 y/o         |                  |       | 35–44           |                  |       | >74 y/o         |                  |       |
| 1983–1987 | 12.4            | 25.4             | 79.7  | 3.8             | 65.5             | 83.6  | 4.2             | 9.2              | 77.8  | 5.4             | 59.1             | 102.4 |
| 1988–1992 | 10.6            | 22.3             | 94.1  | 3.2             | 43.6             | 67.7  | 3.0             | 7.3              | 76.0  | 4.6             | 36.1             | 75.5  |
| 1993–1997 | 8.2             | 20.0             | 81.4  | 2.6             | 30.5             | 58.6  | 3.6             | 8.7              | 102.1 | 3.0             | 19.5             | 56.8  |
| 1998–2002 | 11.4            | 26.5             | 75.3  | 5.2             | 42.3             | 80.3  | 5.4             | 12.3             | 118.8 | 4.0             | 19.9             | 64.1  |
| 2003–2007 | 15.0            | 28.8             | 72.0  | 6.0             | 35.4             | 78.6  | 5.0             | 11.0             | 86.8  | 6.0             | 21.4             | 95.2  |
| 2008–2012 | 21.0            | 35.9             | 96.4  | 7.8             | 33.9             | 81.7  | 5.8             | 11.2             | 82.7  | 7.0             | 19.3             | 100.4 |

Secondary Medical Zone ID: 124

|           | Male            |          |       |          |          |       | Female          |          |       |          |          |       |
|-----------|-----------------|----------|-------|----------|----------|-------|-----------------|----------|-------|----------|----------|-------|
|           | Suicide         |          |       | Suicide  |          |       | Suicide         |          |       | Suicide  |          |       |
|           | Num             | Rate     | × 100 | Num      | Rate     | × 100 | Num             | Rate     | × 100 | Num      | Rate     | × 100 |
|           | per year        | /100,000 |       | per year | /100,000 |       | per year        | /100,000 |       | per year | /100,000 |       |
|           | Total (>10 y/o) |          |       | 45–54    |          |       | Total (>10 y/o) |          |       | 45–54    |          |       |
| 1983–1987 | 52.0            | 27.7     | 80.7  | 13.0     | 41.0     | 81.0  | 33.4            | 16.4     | 110.5 | 4.6      | 16.0     | 92.6  |
| 1988–1992 | 47.2            | 21.3     | 83.2  | 9.2      | 23.9     | 69.7  | 26.6            | 11.8     | 89.7  | 4.8      | 13.2     | 90.5  |
| 1993–1997 | 52.2            | 20.8     | 80.0  | 14.2     | 30.7     | 84.0  | 23.2            | 9.3      | 81.8  | 5.4      | 12.1     | 93.7  |
| 1998–2002 | 82.6            | 30.4     | 82.1  | 19.4     | 44.2     | 79.0  | 36.2            | 12.5     | 98.8  | 6.2      | 14.2     | 94.4  |
| 2003–2007 | 90.4            | 32.5     | 86.2  | 17.8     | 47.4     | 84.7  | 31.6            | 11.7     | 87.6  | 4.8      | 13.2     | 96.0  |
| 2008–2012 | 89.0            | 31.0     | 89.8  | 14.2     | 40.6     | 83.5  | 33.4            | 12.1     | 90.4  | 3.4      | 11.6     | 77.7  |
|           | 15–24           |          |       | 55–64    |          |       | 15–24           |          |       | 55–64    |          |       |
| 1983–1987 | 5.4             | 11.9     | 85.7  | 5.6      | 32.1     | 75.6  | 2.4             | 6.8      | 100.1 | 3.8      | 18.8     | 95.4  |
| 1988–1992 | 5.6             | 10.0     | 100.6 | 7.8      | 30.8     | 86.9  | 2.2             | 5.1      | 97.0  | 3.2      | 14.3     | 80.3  |
| 1993–1997 | 6.2             | 11.4     | 100.4 | 10.6     | 34.0     | 84.4  | 1.4             | 3.8      | 73.1  | 4.2      | 14.2     | 89.1  |
| 1998–2002 | 5.6             | 12.8     | 80.9  | 19.4     | 50.8     | 80.0  | 2.6             | 6.8      | 97.4  | 7.0      | 18.5     | 98.2  |
| 2003–2007 | 7.4             | 17.6     | 101.0 | 22.0     | 49.6     | 85.9  | 2.0             | 7.0      | 77.7  | 5.2      | 13.1     | 78.5  |
| 2008–2012 | 6.0             | 18.1     | 85.3  | 23.0     | 51.2     | 105.4 | 2.6             | 9.2      | 94.7  | 6.0      | 13.9     | 93.0  |
|           | 25–34           |          |       | 65–74    |          |       | 25–34           |          |       | 65–74    |          |       |
| 1983–1987 | 6.6             | 19.6     | 76.6  | 4.6      | 43.3     | 98.9  | 4.8             | 13.2     | 122.6 | 5.8      | 39.0     | 124.7 |
| 1988–1992 | 6.4             | 17.0     | 88.8  | 4.8      | 35.9     | 101.8 | 2.8             | 8.4      | 97.4  | 4.8      | 27.6     | 105.7 |
| 1993–1997 | 6.4             | 15.4     | 78.7  | 4.4      | 26.3     | 82.4  | 2.8             | 7.7      | 92.5  | 4.0      | 19.3     | 98.9  |
| 1998–2002 | 11.0            | 24.2     | 89.6  | 9.2      | 40.7     | 89.5  | 6.0             | 13.6     | 117.5 | 5.4      | 21.4     | 102.0 |
| 2003–2007 | 11.6            | 27.3     | 88.1  | 9.2      | 33.1     | 77.1  | 6.4             | 15.3     | 117.8 | 6.2      | 20.0     | 107.4 |
| 2008–2012 | 9.6             | 27.2     | 83.6  | 13.6     | 38.0     | 96.2  | 5.4             | 15.5     | 108.3 | 6.4      | 17.6     | 98.7  |
|           | 35–44           |          |       | >74 y/o  |          |       | 35–44           |          |       | >74 y/o  |          |       |
| 1983–1987 | 12.8            | 27.4     | 86.1  | 3.8      | 72.2     | 92.1  | 6.6             | 13.6     | 115.6 | 5.4      | 63.9     | 110.7 |
| 1988–1992 | 8.6             | 19.4     | 81.7  | 4.6      | 61.7     | 95.6  | 3.8             | 8.9      | 92.2  | 4.6      | 39.0     | 81.5  |
| 1993–1997 | 8.0             | 20.7     | 84.3  | 2.4      | 31.3     | 60.0  | 2.2             | 6.6      | 78.2  | 3.2      | 22.1     | 64.2  |
| 1998–2002 | 12.0            | 32.0     | 90.8  | 6.0      | 51.1     | 96.9  | 3.0             | 9.1      | 88.4  | 6.0      | 29.8     | 96.0  |
| 2003–2007 | 16.0            | 38.8     | 96.7  | 6.4      | 40.7     | 90.4  | 4.2             | 11.8     | 93.1  | 2.6      | 11.8     | 52.5  |
| 2008–2012 | 14.8            | 33.1     | 88.9  | 7.8      | 37.8     | 91.2  | 5.4             | 13.3     | 97.8  | 4.2      | 14.2     | 73.9  |

Secondary Medical Zone ID: 125

|                 | Male            |                  |       |                 |                  |       | Female          |                  |       |                 |                  |       |
|-----------------|-----------------|------------------|-------|-----------------|------------------|-------|-----------------|------------------|-------|-----------------|------------------|-------|
|                 | Suicide         |                  |       | Suicide         |                  |       | Suicide         |                  |       | Suicide         |                  |       |
|                 | Num<br>per year | Rate<br>/100,000 | × 100 | Num<br>per year | Rate<br>/100,000 | × 100 | Num<br>per year | Rate<br>/100,000 | × 100 | Num<br>per year | Rate<br>/100,000 | × 100 |
|                 |                 |                  |       |                 |                  |       |                 |                  |       |                 |                  |       |
| Total (>10 y/o) | 45–54           | Total (>10 y/o)  | 45–54 |                 |                  |       |                 |                  |       |                 |                  |       |
| 1983–1987       | 67.8            | 28.7             | 82.8  | 17.0            | 38.4             | 76.0  | 30.6            | 14.5             | 89.3  | 4.8             | 13.6             | 78.9  |
| 1988–1992       | 65.8            | 21.8             | 89.1  | 20.6            | 35.3             | 102.7 | 31.4            | 11.5             | 88.2  | 6.6             | 13.0             | 88.9  |
| 1993–1997       | 79.6            | 22.9             | 91.1  | 20.2            | 31.7             | 86.5  | 31.8            | 9.7              | 88.8  | 7.8             | 12.4             | 96.2  |
| 1998–2002       | 117.0           | 31.5             | 85.4  | 26.4            | 44.3             | 79.1  | 46.4            | 12.5             | 98.2  | 8.4             | 14.2             | 94.2  |
| 2003–2007       | 124.8           | 31.7             | 86.0  | 21.6            | 41.7             | 74.5  | 46.4            | 12.1             | 94.9  | 6.4             | 13.0             | 95.2  |
| 2008–2012       | 127.6           | 32.1             | 92.5  | 27.0            | 51.6             | 106.2 | 49.0            | 12.9             | 96.5  | 7.0             | 15.1             | 100.9 |
|                 | 15–24           |                  |       | 55–64           |                  |       | 15–24           |                  |       | 55–64           |                  |       |
| 1983–1987       | 6.4             | 11.5             | 82.6  | 7.6             | 36.1             | 84.9  | 2.0             | 5.0              | 73.2  | 4.8             | 20.9             | 105.8 |
| 1988–1992       | 7.8             | 10.4             | 105.0 | 7.6             | 25.1             | 70.7  | 3.2             | 5.2              | 98.7  | 5.2             | 17.5             | 98.2  |
| 1993–1997       | 10.6            | 14.2             | 125.5 | 15.2            | 35.2             | 87.4  | 3.4             | 5.4              | 104.3 | 5.6             | 14.5             | 91.4  |
| 1998–2002       | 9.2             | 15.7             | 99.2  | 27.8            | 51.8             | 81.6  | 3.8             | 7.2              | 102.9 | 11.0            | 20.5             | 108.9 |
| 2003–2007       | 7.2             | 15.1             | 86.7  | 30.2            | 49.8             | 86.2  | 2.8             | 7.1              | 79.0  | 9.0             | 15.0             | 89.8  |
| 2008–2012       | 5.4             | 14.2             | 66.8  | 23.4            | 41.2             | 84.8  | 4.4             | 10.9             | 111.9 | 7.6             | 13.3             | 89.1  |
|                 | 25–34           |                  |       | 65–74           |                  |       | 25–34           |                  |       | 65–74           |                  |       |
| 1983–1987       | 10.6            | 22.4             | 87.6  | 4.8             | 45.8             | 104.5 | 2.4             | 6.9              | 64.1  | 5.2             | 36.2             | 115.8 |
| 1988–1992       | 8.4             | 15.6             | 81.5  | 2.8             | 24.6             | 69.7  | 3.4             | 7.8              | 89.9  | 3.2             | 20.2             | 77.3  |
| 1993–1997       | 13.4            | 20.0             | 102.4 | 4.8             | 26.0             | 81.5  | 2.6             | 5.7              | 68.4  | 4.4             | 19.9             | 101.9 |
| 1998–2002       | 18.0            | 24.5             | 90.8  | 9.6             | 36.3             | 79.8  | 8.8             | 13.4             | 115.2 | 3.4             | 14.2             | 67.5  |
| 2003–2007       | 19.6            | 28.6             | 92.2  | 15.8            | 40.9             | 95.4  | 7.4             | 12.4             | 95.3  | 7.4             | 19.3             | 103.6 |
| 2008–2012       | 16.8            | 30.1             | 92.5  | 17.6            | 36.5             | 92.4  | 8.6             | 16.4             | 114.3 | 7.4             | 15.6             | 87.9  |
|                 | 35–44           |                  |       | >74 y/o         |                  |       | 35–44           |                  |       | >74 y/o         |                  |       |
| 1983–1987       | 16.2            | 25.5             | 80.1  | 4.6             | 90.5             | 115.5 | 6.2             | 10.2             | 86.5  | 5.2             | 71.9             | 124.5 |
| 1988–1992       | 13.8            | 22.2             | 93.8  | 4.4             | 63.2             | 98.0  | 4.8             | 8.4              | 87.4  | 4.8             | 43.1             | 90.2  |
| 1993–1997       | 10.0            | 18.9             | 77.2  | 5.0             | 55.5             | 106.5 | 3.6             | 7.5              | 88.5  | 4.4             | 29.3             | 85.3  |
| 1998–2002       | 17.8            | 32.5             | 92.3  | 8.0             | 64.3             | 122.0 | 6.0             | 11.9             | 115.2 | 4.6             | 23.8             | 76.5  |
| 2003–2007       | 23.4            | 37.1             | 92.6  | 7.0             | 41.2             | 91.5  | 7.4             | 13.2             | 104.8 | 5.4             | 20.4             | 91.1  |
| 2008–2012       | 26.0            | 36.1             | 96.9  | 10.8            | 44.3             | 106.7 | 8.4             | 13.3             | 98.3  | 5.6             | 16.6             | 86.1  |

Secondary Medical Zone ID: 126

|           | Male            |          |       |          |          |       | Female          |          |       |          |          |       |
|-----------|-----------------|----------|-------|----------|----------|-------|-----------------|----------|-------|----------|----------|-------|
|           | Suicide         |          |       | Suicide  |          |       | Suicide         |          |       | Suicide  |          |       |
|           | Num             | Rate     | × 100 | Num      | Rate     | × 100 | Num             | Rate     | × 100 | Num      | Rate     | × 100 |
|           | per year        | /100,000 |       | per year | /100,000 |       | per year        | /100,000 |       | per year | /100,000 |       |
|           | Total (>10 y/o) |          |       | 45–54    |          |       | Total (>10 y/o) |          |       | 45–54    |          |       |
| 1983–1987 | 59.2            | 30.4     | 87.2  | 12.6     | 34.8     | 68.9  | 24.4            | 13.4     | 84.3  | 4.2      | 14.0     | 81.0  |
| 1988–1992 | 47.0            | 20.2     | 77.9  | 13.6     | 29.2     | 85.1  | 26.2            | 11.5     | 86.4  | 5.8      | 13.6     | 92.8  |
| 1993–1997 | 61.2            | 21.8     | 84.7  | 15.2     | 30.1     | 82.2  | 26.4            | 9.5      | 86.3  | 6.4      | 12.4     | 96.2  |
| 1998–2002 | 100.2           | 31.5     | 87.0  | 21.2     | 44.0     | 78.6  | 43.8            | 13.2     | 105.8 | 7.6      | 15.2     | 100.8 |
| 2003–2007 | 104.6           | 31.8     | 85.6  | 19.4     | 44.9     | 80.3  | 39.0            | 12.3     | 92.0  | 6.2      | 14.4     | 104.9 |
| 2008–2012 | 106.6           | 32.6     | 91.7  | 20.4     | 46.4     | 95.4  | 45.0            | 13.0     | 101.0 | 6.4      | 15.5     | 103.9 |
|           | 15–24           |          |       | 55–64    |          |       | 15–24           |          |       | 55–64    |          |       |
| 1983–1987 | 7.0             | 14.5     | 104.0 | 5.2      | 30.8     | 72.5  | 2.0             | 5.4      | 79.7  | 2.2      | 14.4     | 72.9  |
| 1988–1992 | 5.0             | 8.6      | 87.0  | 7.4      | 28.2     | 79.3  | 1.8             | 3.9      | 73.8  | 3.2      | 14.2     | 79.8  |
| 1993–1997 | 7.4             | 12.2     | 107.8 | 10.8     | 30.9     | 76.8  | 3.0             | 5.4      | 104.0 | 3.8      | 12.5     | 78.5  |
| 1998–2002 | 7.0             | 14.4     | 91.1  | 26.4     | 58.7     | 92.3  | 3.0             | 6.5      | 92.6  | 8.2      | 18.8     | 99.7  |
| 2003–2007 | 6.8             | 15.9     | 91.0  | 25.4     | 51.4     | 89.1  | 4.2             | 9.7      | 107.5 | 5.4      | 12.2     | 73.1  |
| 2008–2012 | 8.6             | 21.5     | 101.4 | 17.8     | 39.1     | 80.6  | 4.6             | 11.3     | 116.8 | 8.4      | 16.3     | 109.6 |
|           | 25–34           |          |       | 65–74    |          |       | 25–34           |          |       | 65–74    |          |       |
| 1983–1987 | 7.8             | 21.5     | 83.9  | 7.8      | 71.9     | 164.1 | 3.2             | 9.5      | 88.3  | 4.2      | 33.9     | 108.3 |
| 1988–1992 | 6.6             | 15.5     | 80.9  | 3.2      | 29.1     | 82.5  | 2.2             | 6.7      | 77.0  | 4.6      | 29.2     | 111.7 |
| 1993–1997 | 10.6            | 19.0     | 97.5  | 5.2      | 30.6     | 95.8  | 3.4             | 7.5      | 89.9  | 3.4      | 18.2     | 93.3  |
| 1998–2002 | 17.2            | 27.2     | 100.8 | 11.8     | 47.7     | 104.9 | 8.4             | 14.3     | 123.4 | 6.0      | 23.3     | 110.7 |
| 2003–2007 | 21.0            | 34.9     | 112.5 | 9.4      | 30.8     | 71.8  | 7.8             | 14.4     | 110.4 | 6.4      | 19.4     | 104.0 |
| 2008–2012 | 15.6            | 32.5     | 99.9  | 12.4     | 31.8     | 80.6  | 6.2             | 14.2     | 99.1  | 6.6      | 16.3     | 91.6  |
|           | 35–44           |          |       | >74 y/o  |          |       | 35–44           |          |       | >74 y/o  |          |       |
| 1983–1987 | 13.8            | 26.8     | 84.3  | 4.8      | 104.6    | 133.5 | 6.2             | 11.8     | 100.1 | 2.4      | 43.5     | 75.4  |
| 1988–1992 | 8.2             | 17.6     | 74.1  | 3.0      | 53.2     | 82.5  | 3.8             | 8.4      | 86.7  | 4.8      | 47.0     | 98.3  |
| 1993–1997 | 8.0             | 18.7     | 76.4  | 3.8      | 49.2     | 94.4  | 2.2             | 6.2      | 73.3  | 4.0      | 29.5     | 85.6  |
| 1998–2002 | 12.2            | 26.8     | 76.2  | 4.4      | 43.8     | 83.0  | 4.4             | 10.4     | 100.8 | 6.2      | 33.0     | 106.2 |
| 2003–2007 | 17.2            | 32.3     | 80.7  | 5.0      | 34.8     | 77.3  | 6.6             | 13.4     | 106.5 | 2.4      | 11.6     | 51.8  |
| 2008–2012 | 24.2            | 39.8     | 107.0 | 7.4      | 35.5     | 85.6  | 6.8             | 12.9     | 95.0  | 6.0      | 19.1     | 99.2  |

Secondary Medical Zone ID: 127

|           | Male            |          |       |          |          |       | Female          |          |       |          |          |       |
|-----------|-----------------|----------|-------|----------|----------|-------|-----------------|----------|-------|----------|----------|-------|
|           | Suicide         |          |       | Suicide  |          |       | Suicide         |          |       | Suicide  |          |       |
|           | Num             | Rate     | × 100 | Num      | Rate     | × 100 | Num             | Rate     | × 100 | Num      | Rate     | × 100 |
|           | per year        | /100,000 |       | per year | /100,000 |       | per year        | /100,000 |       | per year | /100,000 |       |
|           | Total (>10 y/o) |          |       | 45–54    |          |       | Total (>10 y/o) |          |       | 45–54    |          |       |
| 1983–1987 | 39.8            | 29.7     | 88.8  | 10.0     | 43.6     | 86.2  | 18.2            | 13.0     | 81.1  | 4.0      | 16.9     | 98.1  |
| 1988–1992 | 35.4            | 23.1     | 93.5  | 8.0      | 31.1     | 90.7  | 19.6            | 11.7     | 88.0  | 2.8      | 12.2     | 83.3  |
| 1993–1997 | 37.8            | 22.9     | 90.3  | 12.0     | 40.3     | 110.0 | 16.8            | 9.4      | 83.0  | 4.0      | 13.3     | 102.8 |
| 1998–2002 | 58.6            | 34.1     | 93.3  | 13.0     | 48.8     | 87.2  | 20.6            | 11.4     | 84.7  | 4.0      | 14.6     | 97.2  |
| 2003–2007 | 57.8            | 34.2     | 91.3  | 13.2     | 55.8     | 99.8  | 25.0            | 13.2     | 101.9 | 3.8      | 15.1     | 110.1 |
| 2008–2012 | 63.2            | 35.6     | 106.3 | 12.0     | 52.7     | 108.4 | 22.6            | 12.2     | 94.6  | 4.2      | 17.7     | 118.4 |
|           | 15–24           |          |       | 55–64    |          |       | 15–24           |          |       | 55–64    |          |       |
| 1983–1987 | 3.2             | 13.1     | 94.2  | 4.8      | 33.3     | 78.3  | 0.8             | 4.9      | 72.2  | 3.8      | 20.3     | 103.1 |
| 1988–1992 | 3.2             | 10.9     | 110.4 | 8.6      | 40.4     | 113.7 | 1.2             | 4.8      | 91.7  | 3.4      | 16.6     | 92.9  |
| 1993–1997 | 2.0             | 9.3      | 81.8  | 9.2      | 39.8     | 98.9  | 0.6             | 3.7      | 70.2  | 2.4      | 12.0     | 75.3  |
| 1998–2002 | 5.0             | 20.1     | 127.0 | 16.2     | 64.0     | 100.7 | 1.6             | 7.3      | 103.3 | 3.8      | 16.1     | 85.3  |
| 2003–2007 | 3.0             | 16.7     | 95.5  | 12.6     | 47.6     | 82.5  | 1.8             | 9.4      | 105.0 | 5.2      | 17.4     | 104.2 |
| 2008–2012 | 4.0             | 22.6     | 106.7 | 12.0     | 45.5     | 93.7  | 0.6             | 6.4      | 65.8  | 4.0      | 14.6     | 97.7  |
|           | 25–34           |          |       | 65–74    |          |       | 25–34           |          |       | 65–74    |          |       |
| 1983–1987 | 7.6             | 30.9     | 120.9 | 4.6      | 49.2     | 112.4 | 1.0             | 7.0      | 65.0  | 3.4      | 28.8     | 92.1  |
| 1988–1992 | 4.0             | 17.7     | 92.5  | 3.6      | 33.7     | 95.8  | 2.4             | 10.0     | 115.3 | 3.2      | 22.9     | 87.8  |
| 1993–1997 | 3.2             | 14.5     | 74.3  | 4.8      | 33.4     | 104.6 | 2.0             | 8.5      | 101.6 | 3.2      | 18.9     | 96.8  |
| 1998–2002 | 4.6             | 20.3     | 75.2  | 6.8      | 40.8     | 89.6  | 2.2             | 10.1     | 87.3  | 3.8      | 19.7     | 93.9  |
| 2003–2007 | 8.8             | 35.0     | 112.8 | 9.8      | 47.9     | 111.5 | 3.8             | 15.2     | 116.6 | 2.8      | 14.6     | 78.4  |
| 2008–2012 | 6.0             | 31.1     | 95.5  | 10.8     | 46.0     | 116.4 | 2.0             | 12.4     | 86.2  | 4.2      | 17.1     | 96.2  |
|           | 35–44           |          |       | >74 y/o  |          |       | 35–44           |          |       | >74 y/o  |          |       |
| 1983–1987 | 7.0             | 25.7     | 80.7  | 2.4      | 58.5     | 74.7  | 2.2             | 9.2      | 77.5  | 2.8      | 41.3     | 71.7  |
| 1988–1992 | 5.2             | 19.9     | 83.9  | 2.8      | 50.0     | 77.6  | 1.6             | 7.5      | 77.6  | 5.0      | 46.8     | 97.9  |
| 1993–1997 | 4.0             | 18.3     | 74.8  | 2.6      | 39.5     | 75.9  | 1.6             | 7.5      | 88.2  | 3.0      | 24.1     | 70.1  |
| 1998–2002 | 8.0             | 34.6     | 98.4  | 5.0      | 54.2     | 102.9 | 1.6             | 8.6      | 83.4  | 3.4      | 22.1     | 71.0  |
| 2003–2007 | 6.6             | 29.3     | 73.1  | 3.6      | 33.6     | 74.6  | 3.8             | 14.8     | 117.5 | 3.8      | 19.1     | 85.1  |
| 2008–2012 | 10.8            | 40.2     | 108.0 | 7.4      | 46.2     | 111.5 | 2.8             | 12.4     | 91.7  | 4.6      | 18.6     | 96.8  |



Secondary Medical Zone ID: 128

|           | Male            |          |       |          |          |       | Female          |          |       |          |          |       |
|-----------|-----------------|----------|-------|----------|----------|-------|-----------------|----------|-------|----------|----------|-------|
|           | Suicide         |          |       | Suicide  |          |       | Suicide         |          |       | Suicide  |          |       |
|           | Num             | Rate     | × 100 | Num      | Rate     | × 100 | Num             | Rate     | × 100 | Num      | Rate     | × 100 |
|           | per year        | /100,000 |       | per year | /100,000 |       | per year        | /100,000 |       | per year | /100,000 |       |
|           | Total (>10 y/o) |          |       | 45–54    |          |       | Total (>10 y/o) |          |       | 45–54    |          |       |
| 1983–1987 | 49.2            | 42.8     | 146.2 | 12.2     | 71.1     | 140.5 | 21.4            | 16.2     | 110.3 | 3.0      | 17.3     | 100.3 |
| 1988–1992 | 40.2            | 32.6     | 148.0 | 8.2      | 48.3     | 140.5 | 25.0            | 15.3     | 134.9 | 2.0      | 13.7     | 93.8  |
| 1993–1997 | 43.6            | 33.4     | 150.1 | 9.8      | 50.3     | 137.4 | 28.8            | 14.9     | 170.5 | 3.4      | 16.4     | 127.3 |
| 1998–2002 | 60.4            | 45.1     | 143.5 | 15.0     | 75.3     | 134.6 | 30.4            | 15.6     | 155.6 | 2.8      | 15.5     | 103.2 |
| 2003–2007 | 64.2            | 49.2     | 154.4 | 13.4     | 76.9     | 137.6 | 22.8            | 13.4     | 128.9 | 3.2      | 16.7     | 121.9 |
| 2008–2012 | 53.4            | 43.5     | 139.8 | 12.0     | 73.7     | 151.6 | 17.4            | 13.5     | 107.5 | 3.2      | 18.9     | 126.9 |
|           | 15–24           |          |       | 55–64    |          |       | 15–24           |          |       | 55–64    |          |       |
| 1983–1987 | 3.8             | 22.6     | 161.8 | 11.0     | 68.4     | 160.9 | 0.8             | 6.6      | 96.3  | 2.8      | 17.8     | 90.2  |
| 1988–1992 | 1.6             | 10.7     | 108.2 | 10.2     | 57.0     | 160.7 | 0.6             | 5.0      | 95.3  | 3.8      | 19.8     | 110.7 |
| 1993–1997 | 3.0             | 15.6     | 137.8 | 8.8      | 52.3     | 129.9 | 0.6             | 5.0      | 95.5  | 6.2      | 27.8     | 175.2 |
| 1998–2002 | 2.0             | 15.7     | 99.4  | 13.8     | 86.4     | 136.0 | 1.0             | 7.5      | 106.3 | 5.2      | 25.7     | 136.5 |
| 2003–2007 | 1.8             | 16.7     | 95.5  | 12.8     | 73.3     | 127.0 | 1.0             | 9.1      | 101.5 | 3.0      | 17.4     | 104.1 |
| 2008–2012 | 4.0             | 29.4     | 138.7 | 11.4     | 58.8     | 121.0 | 1.6             | 12.7     | 131.0 | 1.2      | 11.2     | 75.4  |
|           | 25–34           |          |       | 65–74    |          |       | 25–34           |          |       | 65–74    |          |       |
| 1983–1987 | 6.0             | 33.4     | 130.5 | 4.8      | 52.6     | 120.2 | 2.2             | 12.5     | 116.3 | 6.2      | 45.9     | 146.8 |
| 1988–1992 | 4.8             | 29.0     | 151.8 | 4.0      | 39.6     | 112.4 | 1.6             | 10.1     | 116.5 | 6.8      | 43.1     | 165.2 |
| 1993–1997 | 4.8             | 29.4     | 150.3 | 6.2      | 45.6     | 143.0 | 0.8             | 7.6      | 91.1  | 5.4      | 29.5     | 151.3 |
| 1998–2002 | 5.4             | 34.4     | 127.3 | 11.0     | 68.9     | 151.5 | 2.0             | 13.3     | 115.1 | 6.4      | 31.7     | 151.1 |
| 2003–2007 | 4.8             | 34.6     | 111.6 | 10.2     | 65.9     | 153.6 | 1.0             | 11.2     | 85.8  | 4.4      | 23.5     | 126.5 |
| 2008–2012 | 5.6             | 40.5     | 124.5 | 7.6      | 51.9     | 131.3 | 1.0             | 12.6     | 87.6  | 3.0      | 19.0     | 106.7 |
|           | 35–44           |          |       | >74 y/o  |          |       | 35–44           |          |       | >74 y/o  |          |       |
| 1983–1987 | 6.6             | 36.3     | 114.1 | 4.8      | 97.6     | 124.6 | 1.6             | 10.8     | 91.4  | 4.8      | 61.1     | 106.0 |
| 1988–1992 | 6.6             | 32.2     | 135.9 | 4.8      | 78.3     | 121.4 | 2.4             | 11.5     | 118.9 | 7.8      | 71.5     | 149.5 |
| 1993–1997 | 5.8             | 31.8     | 129.8 | 5.2      | 72.0     | 138.3 | 1.8             | 9.9      | 115.9 | 10.2     | 74.1     | 215.3 |
| 1998–2002 | 6.2             | 40.4     | 114.6 | 6.8      | 76.4     | 145.0 | 1.0             | 8.9      | 86.4  | 12.0     | 70.0     | 225.3 |
| 2003–2007 | 10.8            | 70.1     | 175.1 | 10.2     | 84.6     | 187.9 | 0.4             | 8.8      | 69.3  | 9.8      | 46.2     | 205.7 |
| 2008–2012 | 6.4             | 43.6     | 117.2 | 6.4      | 49.4     | 119.0 | 1.6             | 13.3     | 98.3  | 5.8      | 24.5     | 127.4 |

Secondary Medical Zone ID: 129

|                 | Male            |                  |       |                 |                  |       | Female          |                  |       |                 |                  |       |
|-----------------|-----------------|------------------|-------|-----------------|------------------|-------|-----------------|------------------|-------|-----------------|------------------|-------|
|                 | Suicide         |                  |       | Suicide         |                  |       | Suicide         |                  |       | Suicide         |                  |       |
|                 | Num<br>per year | Rate<br>/100,000 | × 100 | Num<br>per year | Rate<br>/100,000 | × 100 | Num<br>per year | Rate<br>/100,000 | × 100 | Num<br>per year | Rate<br>/100,000 | × 100 |
|                 |                 |                  |       |                 |                  |       |                 |                  |       |                 |                  |       |
| Total (>10 y/o) | 45–54           | Total (>10 y/o)  | 45–54 |                 |                  |       |                 |                  |       |                 |                  |       |
| 1983–1987       | 124.6           | 35.0             | 108.3 | 36.2            | 62.8             | 124.2 | 64.6            | 15.5             | 102.6 | 9.0             | 15.4             | 89.6  |
| 1988–1992       | 103.6           | 26.6             | 109.5 | 22.0            | 36.5             | 106.4 | 71.4            | 14.4             | 118.3 | 10.4            | 16.4             | 111.9 |
| 1993–1997       | 113.4           | 26.9             | 108.7 | 25.6            | 37.2             | 101.7 | 70.0            | 12.8             | 126.4 | 9.2             | 13.3             | 102.9 |
| 1998–2002       | 181.6           | 41.0             | 115.4 | 49.4            | 68.2             | 121.8 | 77.2            | 13.3             | 116.0 | 11.0            | 15.3             | 101.9 |
| 2003–2007       | 183.4           | 40.9             | 114.2 | 40.2            | 63.3             | 113.2 | 66.6            | 12.6             | 103.6 | 7.8             | 12.6             | 91.8  |
| 2008–2012       | 159.6           | 36.9             | 106.7 | 31.8            | 55.7             | 114.5 | 67.0            | 13.0             | 104.5 | 10.0            | 17.0             | 113.7 |
|                 | 15–24           |                  |       | 55–64           |                  |       | 15–24           |                  |       | 55–64           |                  |       |
| 1983–1987       | 6.4             | 11.6             | 83.0  | 19.8            | 44.5             | 104.8 | 4.2             | 7.1              | 104.4 | 9.6             | 18.7             | 94.7  |
| 1988–1992       | 6.8             | 10.7             | 107.8 | 19.4            | 37.2             | 104.9 | 2.8             | 4.7              | 88.7  | 12.8            | 21.5             | 120.6 |
| 1993–1997       | 7.2             | 11.2             | 98.9  | 21.4            | 39.5             | 98.2  | 3.6             | 5.6              | 106.4 | 11.0            | 18.2             | 114.4 |
| 1998–2002       | 9.8             | 16.3             | 103.4 | 41.0            | 71.2             | 112.1 | 4.2             | 7.2              | 102.5 | 13.4            | 21.4             | 113.8 |
| 2003–2007       | 9.2             | 17.4             | 100.0 | 45.4            | 68.9             | 119.4 | 4.6             | 8.9              | 99.2  | 12.8            | 18.5             | 110.5 |
| 2008–2012       | 10.8            | 23.0             | 108.2 | 39.0            | 55.3             | 113.9 | 4.2             | 9.3              | 96.2  | 11.2            | 15.5             | 103.8 |
|                 | 25–34           |                  |       | 65–74           |                  |       | 25–34           |                  |       | 65–74           |                  |       |
| 1983–1987       | 17.4            | 27.8             | 108.7 | 9.6             | 38.8             | 88.6  | 7.6             | 11.8             | 109.9 | 14.0            | 38.7             | 123.8 |
| 1988–1992       | 11.4            | 20.3             | 106.4 | 11.6            | 37.9             | 107.5 | 5.6             | 9.5              | 110.0 | 10.0            | 24.1             | 92.5  |
| 1993–1997       | 11.8            | 20.6             | 105.6 | 12.6            | 32.6             | 102.1 | 5.8             | 9.6              | 115.7 | 13.2            | 25.9             | 132.7 |
| 1998–2002       | 21.4            | 33.8             | 125.2 | 18.2            | 41.0             | 90.1  | 5.4             | 9.5              | 82.1  | 16.4            | 28.9             | 137.5 |
| 2003–2007       | 20.4            | 33.3             | 107.2 | 24.6            | 50.6             | 117.9 | 7.4             | 12.4             | 95.5  | 11.2            | 19.7             | 105.7 |
| 2008–2012       | 16.6            | 31.1             | 95.6  | 19.8            | 39.7             | 100.4 | 7.8             | 14.5             | 101.3 | 12.0            | 20.3             | 114.3 |
|                 | 35–44           |                  |       | >74 y/o         |                  |       | 35–44           |                  |       | >74 y/o         |                  |       |
| 1983–1987       | 24.2            | 34.4             | 108.2 | 10.6            | 80.5             | 102.8 | 6.8             | 10.2             | 86.0  | 13.4            | 62.8             | 108.8 |
| 1988–1992       | 20.4            | 27.9             | 117.6 | 11.8            | 68.9             | 106.9 | 6.8             | 9.5              | 98.2  | 22.8            | 74.4             | 155.5 |
| 1993–1997       | 19.4            | 29.6             | 120.7 | 15.0            | 71.1             | 136.6 | 5.6             | 8.7              | 101.9 | 21.4            | 55.0             | 159.9 |
| 1998–2002       | 26.0            | 43.7             | 124.0 | 15.8            | 60.6             | 114.9 | 4.2             | 7.9              | 76.4  | 22.4            | 45.4             | 146.1 |
| 2003–2007       | 27.6            | 46.9             | 117.1 | 15.8            | 46.6             | 103.5 | 6.6             | 11.6             | 92.2  | 16.2            | 26.5             | 117.9 |
| 2008–2012       | 26.2            | 41.2             | 110.7 | 15.0            | 37.0             | 89.1  | 5.6             | 10.1             | 74.9  | 16.2            | 22.3             | 116.0 |

Secondary Medical Zone ID: 130

|                 | Male            |                  |       |                 |                  |       | Female          |                  |       |                 |                  |       |
|-----------------|-----------------|------------------|-------|-----------------|------------------|-------|-----------------|------------------|-------|-----------------|------------------|-------|
|                 | Suicide         |                  |       | Suicide         |                  |       | Suicide         |                  |       | Suicide         |                  |       |
|                 | Num<br>per year | Rate<br>/100,000 | × 100 | Num<br>per year | Rate<br>/100,000 | × 100 | Num<br>per year | Rate<br>/100,000 | × 100 | Num<br>per year | Rate<br>/100,000 | × 100 |
|                 |                 |                  |       |                 |                  |       |                 |                  |       |                 |                  |       |
| Total (>10 y/o) | 45–54           | Total (>10 y/o)  | 45–54 |                 |                  |       |                 |                  |       |                 |                  |       |
| 1983–1987       | 39.0            | 36.1             | 115.0 | 12.4            | 67.5             | 133.5 | 20.8            | 16.5             | 112.5 | 3.6             | 19.1             | 110.6 |
| 1988–1992       | 34.4            | 28.6             | 124.9 | 8.6             | 45.6             | 132.8 | 29.0            | 17.4             | 160.4 | 3.0             | 15.9             | 108.6 |
| 1993–1997       | 35.6            | 28.2             | 120.5 | 7.4             | 38.7             | 105.8 | 19.2            | 12.1             | 122.9 | 2.4             | 13.0             | 100.4 |
| 1998–2002       | 58.0            | 43.3             | 132.2 | 14.6            | 71.0             | 126.8 | 21.4            | 13.3             | 116.2 | 3.0             | 15.5             | 103.1 |
| 2003–2007       | 52.4            | 42.3             | 121.4 | 13.0            | 72.4             | 129.5 | 19.6            | 13.0             | 112.7 | 2.2             | 13.5             | 98.6  |
| 2008–2012       | 44.6            | 36.5             | 112.7 | 8.2             | 53.2             | 109.5 | 18.4            | 13.2             | 108.8 | 2.8             | 17.0             | 114.1 |
|                 | 15–24           |                  |       | 55–64           |                  |       | 15–24           |                  |       | 55–64           |                  |       |
| 1983–1987       | 2.4             | 14.9             | 107.2 | 7.6             | 52.7             | 123.9 | 1.2             | 7.2              | 105.5 | 3.6             | 21.8             | 110.5 |
| 1988–1992       | 1.0             | 8.4              | 84.8  | 7.4             | 44.9             | 126.3 | 1.2             | 6.2              | 118.0 | 4.6             | 23.4             | 131.0 |
| 1993–1997       | 2.0             | 12.0             | 105.8 | 4.8             | 33.3             | 82.8  | 1.8             | 7.9              | 151.3 | 2.6             | 15.6             | 98.3  |
| 1998–2002       | 3.4             | 20.0             | 126.3 | 14.0            | 80.7             | 127.0 | 0.8             | 6.6              | 94.1  | 3.2             | 18.9             | 100.2 |
| 2003–2007       | 2.6             | 19.4             | 111.3 | 11.2            | 62.3             | 108.0 | 0.6             | 7.3              | 81.3  | 3.2             | 17.3             | 103.1 |
| 2008–2012       | 1.6             | 18.6             | 87.6  | 7.6             | 43.4             | 89.4  | 1.0             | 9.8              | 100.5 | 2.4             | 14.0             | 93.6  |
|                 | 25–34           |                  |       | 65–74           |                  |       | 25–34           |                  |       | 65–74           |                  |       |
| 1983–1987       | 4.6             | 26.2             | 102.3 | 3.4             | 43.7             | 99.9  | 1.4             | 9.4              | 87.6  | 4.6             | 39.7             | 127.0 |
| 1988–1992       | 3.4             | 21.2             | 111.1 | 4.0             | 40.8             | 115.9 | 2.2             | 11.4             | 131.5 | 5.6             | 39.6             | 152.0 |
| 1993–1997       | 3.6             | 22.3             | 114.2 | 6.0             | 46.6             | 146.1 | 1.4             | 8.9              | 106.4 | 3.4             | 22.4             | 115.0 |
| 1998–2002       | 7.0             | 37.6             | 139.1 | 8.6             | 59.2             | 130.2 | 1.0             | 9.5              | 81.7  | 5.6             | 30.6             | 145.7 |
| 2003–2007       | 5.6             | 35.2             | 113.5 | 5.0             | 38.1             | 88.9  | 1.8             | 12.8             | 98.6  | 4.0             | 22.4             | 120.3 |
| 2008–2012       | 5.8             | 39.3             | 120.6 | 8.2             | 51.2             | 129.7 | 1.8             | 14.5             | 101.4 | 3.6             | 20.3             | 114.3 |
|                 | 35–44           |                  |       | >74 y/o         |                  |       | 35–44           |                  |       | >74 y/o         |                  |       |
| 1983–1987       | 5.2             | 28.4             | 89.1  | 3.4             | 84.3             | 107.7 | 1.2             | 9.1              | 76.8  | 5.2             | 79.1             | 137.0 |
| 1988–1992       | 6.2             | 29.1             | 122.8 | 3.8             | 72.2             | 112.0 | 2.8             | 12.0             | 124.4 | 9.6             | 102.8            | 214.8 |
| 1993–1997       | 5.2             | 28.1             | 114.8 | 6.6             | 93.1             | 178.7 | 1.0             | 7.3              | 85.4  | 6.4             | 55.8             | 162.1 |
| 1998–2002       | 5.8             | 36.8             | 104.5 | 4.2             | 55.4             | 105.1 | 1.4             | 9.9              | 95.7  | 6.2             | 42.8             | 138.0 |
| 2003–2007       | 7.6             | 48.4             | 120.7 | 7.4             | 68.6             | 152.3 | 1.8             | 12.5             | 99.2  | 5.8             | 32.4             | 144.2 |
| 2008–2012       | 5.6             | 36.8             | 99.0  | 7.6             | 58.5             | 140.9 | 1.2             | 11.2             | 82.8  | 5.6             | 26.2             | 136.2 |

Secondary Medical Zone ID: 131

|                 | Male            |                  |       |                 |                  |       | Female          |                  |       |                 |                  |       |
|-----------------|-----------------|------------------|-------|-----------------|------------------|-------|-----------------|------------------|-------|-----------------|------------------|-------|
|                 | Suicide         |                  |       | Suicide         |                  |       | Suicide         |                  |       | Suicide         |                  |       |
|                 | Num<br>per year | Rate<br>/100,000 | × 100 | Num<br>per year | Rate<br>/100,000 | × 100 | Num<br>per year | Rate<br>/100,000 | × 100 | Num<br>per year | Rate<br>/100,000 | × 100 |
|                 |                 |                  |       |                 |                  |       |                 |                  |       |                 |                  |       |
| Total (>10 y/o) | 45–54           | Total (>10 y/o)  | 45–54 |                 |                  |       |                 |                  |       |                 |                  |       |
| 1983–1987       | 87.6            | 40.8             | 130.1 | 21.8            | 66.2             | 130.9 | 59.8            | 21.0             | 154.3 | 6.8             | 19.5             | 113.3 |
| 1988–1992       | 80.8            | 33.7             | 146.7 | 14.2            | 42.8             | 124.6 | 57.8            | 17.4             | 160.7 | 6.6             | 18.3             | 125.4 |
| 1993–1997       | 80.2            | 32.1             | 136.3 | 14.0            | 38.6             | 105.5 | 49.0            | 14.0             | 154.2 | 5.2             | 14.3             | 110.8 |
| 1998–2002       | 109.6           | 42.9             | 128.3 | 25.6            | 67.1             | 119.9 | 53.4            | 15.2             | 144.5 | 5.6             | 15.5             | 102.7 |
| 2003–2007       | 103.4           | 41.6             | 121.4 | 22.8            | 67.2             | 120.2 | 43.8            | 13.6             | 128.0 | 4.0             | 12.9             | 94.1  |
| 2008–2012       | 88.2            | 38.1             | 113.0 | 18.4            | 60.4             | 124.3 | 42.0            | 14.4             | 125.8 | 5.2             | 17.2             | 115.5 |
|                 | 15–24           |                  |       | 55–64           |                  |       | 15–24           |                  |       | 55–64           |                  |       |
| 1983–1987       | 4.4             | 15.5             | 111.0 | 13.8            | 48.2             | 113.5 | 1.4             | 5.9              | 86.9  | 10.2            | 28.5             | 144.5 |
| 1988–1992       | 4.8             | 13.4             | 135.5 | 17.2            | 52.6             | 148.2 | 1.0             | 4.3              | 81.0  | 9.2             | 24.8             | 138.6 |
| 1993–1997       | 5.0             | 13.9             | 122.7 | 14.8            | 47.4             | 117.7 | 1.0             | 4.2              | 80.7  | 8.8             | 24.1             | 151.5 |
| 1998–2002       | 5.2             | 17.0             | 107.4 | 23.2            | 75.0             | 118.1 | 2.6             | 8.7              | 123.6 | 7.4             | 21.9             | 116.3 |
| 2003–2007       | 4.6             | 18.1             | 104.0 | 22.6            | 65.2             | 113.0 | 2.2             | 9.6              | 107.0 | 6.8             | 18.9             | 112.9 |
| 2008–2012       | 3.8             | 19.1             | 90.0  | 17.0            | 47.1             | 96.9  | 3.2             | 13.9             | 143.6 | 6.0             | 16.1             | 107.9 |
|                 | 25–34           |                  |       | 65–74           |                  |       | 25–34           |                  |       | 65–74           |                  |       |
| 1983–1987       | 11.6            | 33.2             | 130.1 | 12.0            | 64.5             | 147.3 | 2.4             | 8.5              | 78.7  | 12.2            | 48.8             | 156.3 |
| 1988–1992       | 7.8             | 24.8             | 129.8 | 9.2             | 44.4             | 126.0 | 3.0             | 9.8              | 112.7 | 12.0            | 42.1             | 161.2 |
| 1993–1997       | 10.0            | 30.5             | 156.1 | 13.2            | 50.9             | 159.7 | 3.0             | 9.8              | 117.9 | 9.6             | 29.6             | 151.9 |
| 1998–2002       | 9.2             | 29.5             | 109.1 | 16.4            | 58.5             | 128.6 | 3.0             | 11.0             | 95.1  | 11.4            | 32.8             | 156.0 |
| 2003–2007       | 10.2            | 33.4             | 107.7 | 14.8            | 53.8             | 125.4 | 2.4             | 10.4             | 80.1  | 7.6             | 23.1             | 124.3 |
| 2008–2012       | 9.8             | 35.7             | 109.7 | 12.4            | 45.4             | 115.0 | 2.8             | 12.8             | 89.3  | 7.4             | 22.6             | 127.2 |
|                 | 35–44           |                  |       | >74 y/o         |                  |       | 35–44           |                  |       | >74 y/o         |                  |       |
| 1983–1987       | 11.0            | 30.3             | 95.2  | 12.8            | 130.8            | 167.0 | 4.8             | 13.0             | 110.4 | 22.0            | 140.9            | 244.2 |
| 1988–1992       | 15.0            | 36.4             | 153.7 | 12.4            | 100.1            | 155.2 | 3.0             | 8.8              | 91.1  | 23.0            | 110.8            | 231.5 |
| 1993–1997       | 12.0            | 33.3             | 135.7 | 11.0            | 75.7             | 145.4 | 2.0             | 6.9              | 81.7  | 19.4            | 75.8             | 220.2 |
| 1998–2002       | 13.6            | 43.4             | 123.2 | 16.4            | 90.6             | 172.0 | 2.8             | 9.9              | 96.0  | 20.4            | 64.6             | 207.9 |
| 2003–2007       | 12.8            | 43.4             | 108.3 | 15.6            | 69.5             | 154.4 | 3.6             | 12.9             | 102.3 | 17.0            | 44.5             | 198.3 |
| 2008–2012       | 13.8            | 43.0             | 115.6 | 12.8            | 50.2             | 121.0 | 2.4             | 10.6             | 78.3  | 14.8            | 33.5             | 174.3 |

Secondary Medical Zone ID: 132

|                 | Male            |                  |       |                 |                  |       | Female          |                  |       |                 |                  |       |
|-----------------|-----------------|------------------|-------|-----------------|------------------|-------|-----------------|------------------|-------|-----------------|------------------|-------|
|                 | Suicide         |                  |       | Suicide         |                  |       | Suicide         |                  |       | Suicide         |                  |       |
|                 | Num<br>per year | Rate<br>/100,000 | × 100 | Num<br>per year | Rate<br>/100,000 | × 100 | Num<br>per year | Rate<br>/100,000 | × 100 | Num<br>per year | Rate<br>/100,000 | × 100 |
|                 |                 |                  |       |                 |                  |       |                 |                  |       |                 |                  |       |
| Total (>10 y/o) | 45–54           | Total (>10 y/o)  | 45–54 |                 |                  |       |                 |                  |       |                 |                  |       |
| 1983–1987       | 52.0            | 46.5             | 165.1 | 9.2             | 61.6             | 121.9 | 31.6            | 21.6             | 169.3 | 4.0             | 22.8             | 132.2 |
| 1988–1992       | 41.8            | 34.5             | 165.8 | 7.6             | 49.5             | 144.3 | 33.0            | 18.7             | 192.5 | 2.4             | 16.3             | 111.3 |
| 1993–1997       | 45.2            | 35.4             | 172.2 | 6.2             | 40.6             | 111.1 | 30.2            | 15.9             | 200.5 | 3.4             | 18.1             | 140.4 |
| 1998–2002       | 57.0            | 47.7             | 155.0 | 12.4            | 72.7             | 130.0 | 34.0            | 18.0             | 194.7 | 6.0             | 26.5             | 176.2 |
| 2003–2007       | 53.0            | 46.5             | 149.4 | 10.2            | 68.2             | 121.9 | 27.0            | 15.4             | 169.7 | 3.8             | 20.1             | 146.6 |
| 2008–2012       | 47.2            | 41.5             | 144.6 | 9.0             | 66.9             | 137.6 | 20.2            | 14.5             | 137.1 | 1.8             | 15.7             | 105.5 |
|                 | 15–24           |                  |       | 55–64           |                  |       | 15–24           |                  |       | 55–64           |                  |       |
| 1983–1987       | 3.2             | 22.3             | 160.0 | 10.0            | 64.0             | 150.6 | 0.8             | 7.3              | 107.0 | 3.4             | 21.1             | 106.8 |
| 1988–1992       | 1.4             | 11.0             | 111.6 | 7.8             | 49.1             | 138.4 | 0.0             | 3.6              | 68.2  | 3.4             | 20.4             | 114.1 |
| 1993–1997       | 1.2             | 11.2             | 99.4  | 9.4             | 60.7             | 150.7 | 0.6             | 5.4              | 103.2 | 4.0             | 23.0             | 144.7 |
| 1998–2002       | 2.8             | 20.7             | 131.3 | 10.8            | 80.2             | 126.2 | 0.6             | 6.8              | 96.8  | 3.2             | 21.7             | 115.5 |
| 2003–2007       | 2.8             | 23.1             | 132.7 | 8.8             | 62.8             | 108.8 | 0.6             | 8.5              | 94.3  | 3.4             | 20.6             | 122.8 |
| 2008–2012       | 2.0             | 23.7             | 111.9 | 11.4            | 64.8             | 133.5 | 1.0             | 11.4             | 117.3 | 3.4             | 18.6             | 124.5 |
|                 | 25–34           |                  |       | 65–74           |                  |       | 25–34           |                  |       | 65–74           |                  |       |
| 1983–1987       | 5.2             | 31.7             | 124.2 | 6.4             | 68.1             | 155.5 | 0.6             | 7.7              | 71.7  | 5.0             | 42.3             | 135.4 |
| 1988–1992       | 3.8             | 26.3             | 137.7 | 7.4             | 63.5             | 180.3 | 1.2             | 9.5              | 109.5 | 8.0             | 53.2             | 204.0 |
| 1993–1997       | 3.0             | 23.9             | 122.4 | 7.2             | 53.1             | 166.4 | 1.2             | 9.6              | 115.2 | 6.0             | 34.7             | 178.3 |
| 1998–2002       | 5.8             | 40.4             | 149.6 | 9.2             | 65.0             | 142.9 | 1.2             | 11.8             | 101.9 | 6.0             | 33.9             | 161.6 |
| 2003–2007       | 4.6             | 38.6             | 124.3 | 8.8             | 65.0             | 151.6 | 1.0             | 12.2             | 93.6  | 3.6             | 23.5             | 126.2 |
| 2008–2012       | 3.4             | 34.7             | 106.4 | 5.0             | 43.4             | 110.0 | 1.2             | 14.4             | 100.2 | 3.8             | 24.2             | 135.9 |
|                 | 35–44           |                  |       | >74 y/o         |                  |       | 35–44           |                  |       | >74 y/o         |                  |       |
| 1983–1987       | 7.6             | 44.9             | 141.2 | 10.2            | 175.5            | 224.0 | 2.2             | 13.8             | 116.5 | 15.6            | 178.0            | 308.6 |
| 1988–1992       | 5.0             | 28.5             | 120.2 | 8.6             | 126.2            | 195.6 | 1.6             | 10.2             | 105.9 | 16.4            | 149.4            | 312.2 |
| 1993–1997       | 7.2             | 40.9             | 167.0 | 11.0            | 136.1            | 261.3 | 1.6             | 10.0             | 118.1 | 13.4            | 101.9            | 296.2 |
| 1998–2002       | 7.2             | 51.1             | 145.2 | 8.8             | 92.3             | 175.0 | 2.4             | 14.9             | 143.8 | 14.6            | 88.2             | 284.1 |
| 2003–2007       | 6.6             | 55.4             | 138.2 | 11.2            | 91.9             | 204.0 | 1.0             | 11.8             | 93.7  | 13.6            | 67.3             | 299.8 |
| 2008–2012       | 5.0             | 42.8             | 115.0 | 11.4            | 81.0             | 195.3 | 1.2             | 13.3             | 98.1  | 7.8             | 34.6             | 180.0 |

Secondary Medical Zone ID: 133

|           | Male            |                  |       |                 |                  |       | Female          |                  |       |                 |                  |       |
|-----------|-----------------|------------------|-------|-----------------|------------------|-------|-----------------|------------------|-------|-----------------|------------------|-------|
|           | Suicide         |                  |       | Suicide         |                  |       | Suicide         |                  |       | Suicide         |                  |       |
|           | Num<br>per year | Rate<br>/100,000 | × 100 | Num<br>per year | Rate<br>/100,000 | × 100 | Num<br>per year | Rate<br>/100,000 | × 100 | Num<br>per year | Rate<br>/100,000 | × 100 |
|           |                 |                  |       |                 |                  |       |                 |                  |       |                 |                  |       |
|           | Total (>10 y/o) |                  |       | 45–54           |                  |       | Total (>10 y/o) |                  |       | 45–54           |                  |       |
| 1983–1987 | 70.4            | 46.8             | 155.6 | 18.0            | 76.9             | 152.0 | 48.8            | 23.8             | 182.2 | 4.6             | 19.4             | 112.9 |
| 1988–1992 | 61.0            | 35.8             | 169.2 | 13.0            | 55.9             | 162.8 | 49.0            | 20.4             | 199.3 | 4.4             | 18.0             | 123.3 |
| 1993–1997 | 51.2            | 30.8             | 136.0 | 11.8            | 47.4             | 129.5 | 41.6            | 15.9             | 192.7 | 4.8             | 17.8             | 137.9 |
| 1998–2002 | 70.8            | 42.2             | 130.0 | 17.2            | 69.2             | 123.6 | 43.2            | 16.0             | 173.1 | 3.0             | 14.3             | 94.8  |
| 2003–2007 | 69.8            | 43.8             | 131.4 | 13.6            | 64.6             | 115.5 | 32.6            | 13.7             | 143.6 | 3.2             | 15.1             | 110.1 |
| 2008–2012 | 62.0            | 39.7             | 127.0 | 12.2            | 63.0             | 129.6 | 24.6            | 13.2             | 117.0 | 1.4             | 11.6             | 77.4  |
|           | 15–24           |                  |       | 55–64           |                  |       | 15–24           |                  |       | 55–64           |                  |       |
| 1983–1987 | 4.0             | 19.8             | 142.0 | 10.0            | 49.5             | 116.4 | 1.4             | 7.6              | 111.1 | 6.6             | 25.9             | 131.1 |
| 1988–1992 | 1.0             | 8.0              | 80.3  | 14.8            | 63.0             | 177.5 | 1.8             | 7.7              | 145.2 | 6.4             | 24.4             | 136.5 |
| 1993–1997 | 2.2             | 12.0             | 106.2 | 8.2             | 40.7             | 101.1 | 0.2             | 3.5              | 66.9  | 6.2             | 24.1             | 151.9 |
| 1998–2002 | 2.2             | 15.0             | 95.1  | 14.2            | 70.4             | 110.8 | 0.4             | 5.3              | 74.9  | 6.2             | 25.2             | 133.7 |
| 2003–2007 | 3.8             | 22.8             | 130.5 | 16.2            | 71.6             | 124.1 | 1.4             | 10.0             | 110.9 | 3.6             | 16.8             | 100.5 |
| 2008–2012 | 4.2             | 28.2             | 133.1 | 14.0            | 57.5             | 118.3 | 1.8             | 12.6             | 130.3 | 2.6             | 13.3             | 89.3  |
|           | 25–34           |                  |       | 65–74           |                  |       | 25–34           |                  |       | 65–74           |                  |       |
| 1983–1987 | 8.0             | 35.3             | 138.0 | 9.6             | 70.0             | 160.0 | 2.0             | 10.5             | 97.1  | 11.0            | 58.5             | 187.3 |
| 1988–1992 | 3.8             | 20.7             | 108.1 | 10.8            | 67.8             | 192.6 | 1.8             | 9.6              | 111.3 | 10.4            | 49.3             | 188.9 |
| 1993–1997 | 3.8             | 20.9             | 107.2 | 8.6             | 48.3             | 151.5 | 1.2             | 7.9              | 95.1  | 9.4             | 38.7             | 198.5 |
| 1998–2002 | 5.6             | 29.3             | 108.7 | 11.8            | 61.3             | 134.8 | 1.6             | 10.7             | 92.2  | 9.8             | 38.6             | 183.6 |
| 2003–2007 | 3.6             | 24.5             | 78.9  | 12.0            | 62.7             | 146.1 | 0.6             | 8.6              | 65.9  | 6.6             | 27.5             | 147.7 |
| 2008–2012 | 4.8             | 32.1             | 98.5  | 8.8             | 48.0             | 121.4 | 2.0             | 14.4             | 100.8 | 5.0             | 22.5             | 126.4 |
|           | 35–44           |                  |       | >74 y/o         |                  |       | 35–44           |                  |       | >74 y/o         |                  |       |
| 1983–1987 | 8.0             | 33.4             | 104.9 | 12.6            | 189.2            | 241.5 | 2.8             | 12.3             | 103.7 | 20.4            | 188.9            | 327.4 |
| 1988–1992 | 6.2             | 25.4             | 107.3 | 11.4            | 135.5            | 210.1 | 3.6             | 12.9             | 133.7 | 20.6            | 143.2            | 299.3 |
| 1993–1997 | 7.2             | 31.6             | 129.1 | 9.0             | 91.6             | 175.9 | 2.4             | 10.4             | 122.5 | 17.4            | 98.1             | 284.9 |
| 1998–2002 | 8.0             | 40.8             | 115.9 | 11.6            | 94.8             | 179.9 | 1.6             | 9.8              | 94.5  | 20.6            | 91.3             | 294.1 |
| 2003–2007 | 10.6            | 55.5             | 138.4 | 9.6             | 65.1             | 144.6 | 1.4             | 10.7             | 84.3  | 15.8            | 57.9             | 258.1 |
| 2008–2012 | 6.6             | 36.8             | 98.8  | 11.4            | 64.5             | 155.5 | 1.4             | 11.2             | 82.6  | 10.4            | 33.7             | 175.0 |

Secondary Medical Zone ID: 134

|                 | Male            |                  |       |                 |                  |       | Female          |                  |       |                 |                  |       |
|-----------------|-----------------|------------------|-------|-----------------|------------------|-------|-----------------|------------------|-------|-----------------|------------------|-------|
|                 | Suicide         |                  |       | Suicide         |                  |       | Suicide         |                  |       | Suicide         |                  |       |
|                 | Num<br>per year | Rate<br>/100,000 | × 100 | Num<br>per year | Rate<br>/100,000 | × 100 | Num<br>per year | Rate<br>/100,000 | × 100 | Num<br>per year | Rate<br>/100,000 | × 100 |
|                 |                 |                  |       |                 |                  |       |                 |                  |       |                 |                  |       |
| Total (>10 y/o) | 45–54           | Total (>10 y/o)  | 45–54 |                 |                  |       |                 |                  |       |                 |                  |       |
| 1983–1987       | 17.6            | 37.5             | 131.9 | 4.0             | 60.0             | 118.6 | 9.2             | 16.0             | 111.1 | 1.8             | 20.4             | 118.3 |
| 1988–1992       | 11.0            | 25.6             | 110.0 | 1.2             | 30.0             | 87.5  | 10.0            | 14.2             | 127.1 | 1.8             | 18.7             | 128.0 |
| 1993–1997       | 15.6            | 29.7             | 143.4 | 2.6             | 41.5             | 113.5 | 7.0             | 11.4             | 112.7 | 1.6             | 16.9             | 131.0 |
| 1998–2002       | 14.8            | 37.2             | 108.5 | 2.8             | 54.6             | 97.5  | 12.0            | 15.1             | 151.0 | 1.8             | 19.6             | 130.2 |
| 2003–2007       | 19.0            | 43.2             | 140.5 | 5.4             | 88.6             | 158.4 | 6.8             | 13.2             | 114.0 | 1.2             | 16.6             | 121.0 |
| 2008–2012       | 13.8            | 37.0             | 117.2 | 2.2             | 51.1             | 105.2 | 5.4             | 12.5             | 105.5 | 0.2             | 13.3             | 89.0  |
|                 | 15–24           |                  |       | 55–64           |                  |       | 15–24           |                  |       | 55–64           |                  |       |
| 1983–1987       | 0.2             | 12.0             | 86.3  | 3.0             | 47.0             | 110.5 | 0.4             | 7.5              | 110.2 | 1.2             | 18.6             | 94.4  |
| 1988–1992       | 0.4             | 10.3             | 104.1 | 2.2             | 35.7             | 100.4 | 0.6             | 7.1              | 134.0 | 0.8             | 15.6             | 87.3  |
| 1993–1997       | 1.0             | 14.2             | 125.5 | 4.0             | 54.0             | 134.1 | 0.2             | 5.4              | 103.8 | 0.2             | 11.5             | 72.6  |
| 1998–2002       | 1.0             | 18.9             | 119.4 | 2.8             | 61.0             | 96.0  | 0.0             | 6.2              | 88.9  | 2.0             | 23.3             | 123.9 |
| 2003–2007       | 0.4             | 17.4             | 99.5  | 4.4             | 72.1             | 124.8 | 0.0             | 7.8              | 86.6  | 2.0             | 21.6             | 128.8 |
| 2008–2012       | 0.6             | 22.4             | 105.8 | 2.6             | 49.1             | 101.1 | 0.0             | 8.5              | 87.8  | 0.8             | 15.3             | 102.5 |
|                 | 25–34           |                  |       | 65–74           |                  |       | 25–34           |                  |       | 65–74           |                  |       |
| 1983–1987       | 1.6             | 30.0             | 117.3 | 2.4             | 51.6             | 117.9 | 0.4             | 10.6             | 98.8  | 2.0             | 33.3             | 106.6 |
| 1988–1992       | 1.0             | 21.9             | 114.8 | 1.4             | 33.6             | 95.4  | 0.4             | 9.2              | 105.7 | 2.0             | 29.4             | 112.6 |
| 1993–1997       | 0.8             | 20.8             | 106.6 | 2.0             | 35.5             | 111.4 | 0.6             | 9.8              | 118.3 | 1.0             | 17.3             | 88.7  |
| 1998–2002       | 0.8             | 26.6             | 98.4  | 3.0             | 49.8             | 109.5 | 1.0             | 14.5             | 125.2 | 2.6             | 28.4             | 135.3 |
| 2003–2007       | 2.0             | 39.5             | 127.5 | 3.0             | 50.8             | 118.5 | 0.2             | 12.2             | 94.0  | 0.6             | 15.6             | 84.0  |
| 2008–2012       | 1.2             | 34.7             | 106.5 | 2.6             | 47.2             | 119.5 | 0.2             | 13.6             | 94.7  | 0.8             | 17.4             | 97.7  |
|                 | 35–44           |                  |       | >74 y/o         |                  |       | 35–44           |                  |       | >74 y/o         |                  |       |
| 1983–1987       | 2.0             | 34.6             | 108.8 | 4.4             | 131.3            | 167.6 | 0.4             | 11.0             | 93.2  | 3.0             | 70.7             | 122.6 |
| 1988–1992       | 1.8             | 27.9             | 117.6 | 3.0             | 83.2             | 128.9 | 0.8             | 11.0             | 113.4 | 3.6             | 64.2             | 134.2 |
| 1993–1997       | 1.8             | 30.3             | 123.8 | 3.4             | 80.6             | 154.7 | 0.4             | 8.8              | 102.9 | 3.0             | 45.6             | 132.4 |
| 1998–2002       | 2.2             | 42.7             | 121.2 | 2.2             | 55.3             | 104.9 | 0.4             | 10.5             | 101.6 | 4.2             | 51.4             | 165.6 |
| 2003–2007       | 1.4             | 40.4             | 100.7 | 2.4             | 49.5             | 109.9 | 0.2             | 11.8             | 93.0  | 2.6             | 29.4             | 131.0 |
| 2008–2012       | 1.8             | 41.5             | 111.4 | 2.8             | 48.0             | 115.8 | 0.2             | 12.8             | 94.4  | 3.2             | 28.8             | 149.9 |

Secondary Medical Zone ID: 135

|                 | Male            |                  |       |                 |                  |       | Female          |                  |       |                 |                  |       |
|-----------------|-----------------|------------------|-------|-----------------|------------------|-------|-----------------|------------------|-------|-----------------|------------------|-------|
|                 | Suicide         |                  |       | Suicide         |                  |       | Suicide         |                  |       | Suicide         |                  |       |
|                 | Num<br>per year | Rate<br>/100,000 | × 100 | Num<br>per year | Rate<br>/100,000 | × 100 | Num<br>per year | Rate<br>/100,000 | × 100 | Num<br>per year | Rate<br>/100,000 | × 100 |
|                 |                 |                  |       |                 |                  |       |                 |                  |       |                 |                  |       |
| Total (>10 y/o) | 45–54           | Total (>10 y/o)  | 45–54 |                 |                  |       |                 |                  |       |                 |                  |       |
| 1983–1987       | 29.0            | 41.2             | 144.0 | 6.0             | 59.5             | 117.6 | 14.6            | 17.3             | 123.1 | 1.4             | 15.9             | 92.2  |
| 1988–1992       | 21.2            | 28.5             | 131.3 | 3.4             | 35.1             | 102.2 | 15.6            | 15.2             | 137.1 | 2.2             | 17.1             | 117.1 |
| 1993–1997       | 24.8            | 31.0             | 142.1 | 4.2             | 38.2             | 104.4 | 15.2            | 13.5             | 147.9 | 2.4             | 16.2             | 125.5 |
| 1998–2002       | 27.8            | 37.8             | 115.0 | 5.8             | 56.6             | 101.2 | 19.0            | 15.6             | 155.5 | 2.0             | 16.5             | 109.8 |
| 2003–2007       | 28.4            | 39.3             | 119.1 | 4.8             | 56.6             | 101.2 | 18.6            | 15.1             | 158.8 | 1.6             | 15.4             | 112.2 |
| 2008–2012       | 26.0            | 37.3             | 117.7 | 5.0             | 57.4             | 118.0 | 11.8            | 13.7             | 116.4 | 1.2             | 15.3             | 102.8 |
|                 | 15–24           |                  |       | 55–64           |                  |       | 15–24           |                  |       | 55–64           |                  |       |
| 1983–1987       | 3.2             | 25.1             | 179.8 | 4.8             | 53.5             | 126.0 | 1.0             | 8.2              | 119.4 | 1.6             | 18.7             | 94.6  |
| 1988–1992       | 1.6             | 12.4             | 124.9 | 4.8             | 46.9             | 132.1 | 0.8             | 6.3              | 119.6 | 3.4             | 24.9             | 139.2 |
| 1993–1997       | 1.0             | 11.5             | 102.1 | 5.6             | 53.2             | 132.1 | 1.4             | 8.4              | 161.7 | 2.2             | 18.9             | 118.7 |
| 1998–2002       | 1.2             | 16.3             | 103.3 | 7.2             | 73.8             | 116.2 | 0.4             | 6.8              | 96.9  | 3.0             | 23.2             | 123.2 |
| 2003–2007       | 0.4             | 14.5             | 83.2  | 7.0             | 65.3             | 113.2 | 0.8             | 10.6             | 117.3 | 3.2             | 21.4             | 128.0 |
| 2008–2012       | 1.2             | 21.9             | 103.1 | 4.6             | 47.5             | 97.8  | 0.8             | 11.5             | 118.5 | 1.2             | 13.8             | 92.7  |
|                 | 25–34           |                  |       | 65–74           |                  |       | 25–34           |                  |       | 65–74           |                  |       |
| 1983–1987       | 2.4             | 26.6             | 104.2 | 2.8             | 50.9             | 116.3 | 0.6             | 9.4              | 87.7  | 3.4             | 42.0             | 134.4 |
| 1988–1992       | 1.4             | 18.2             | 95.5  | 3.8             | 52.8             | 149.9 | 0.4             | 7.6              | 87.5  | 2.0             | 26.5             | 101.7 |
| 1993–1997       | 2.0             | 21.8             | 111.5 | 3.6             | 44.4             | 139.2 | 1.0             | 9.6              | 115.0 | 3.6             | 31.8             | 163.2 |
| 1998–2002       | 2.4             | 27.3             | 101.1 | 3.6             | 46.7             | 102.7 | 1.0             | 11.8             | 101.9 | 4.2             | 33.2             | 158.0 |
| 2003–2007       | 3.0             | 33.3             | 107.5 | 5.4             | 58.7             | 136.8 | 1.0             | 13.1             | 100.8 | 3.0             | 24.8             | 133.3 |
| 2008–2012       | 2.6             | 34.5             | 106.0 | 4.0             | 45.2             | 114.3 | 1.0             | 15.0             | 104.5 | 0.8             | 14.5             | 81.4  |
|                 | 35–44           |                  |       | >74 y/o         |                  |       | 35–44           |                  |       | >74 y/o         |                  |       |
| 1983–1987       | 6.2             | 46.0             | 144.4 | 3.6             | 119.5            | 152.5 | 2.4             | 15.4             | 130.0 | 4.0             | 82.4             | 142.9 |
| 1988–1992       | 3.6             | 29.6             | 124.7 | 2.6             | 73.8             | 114.5 | 1.2             | 10.2             | 105.7 | 5.6             | 80.4             | 168.0 |
| 1993–1997       | 4.6             | 39.9             | 162.9 | 3.8             | 80.7             | 155.0 | 0.4             | 7.2              | 85.1  | 4.2             | 51.2             | 148.8 |
| 1998–2002       | 2.2             | 31.4             | 89.1  | 5.4             | 90.7             | 172.1 | 1.4             | 12.8             | 124.1 | 7.0             | 66.2             | 213.3 |
| 2003–2007       | 4.0             | 46.5             | 116.1 | 3.8             | 57.2             | 127.0 | 1.2             | 13.5             | 107.2 | 7.8             | 58.7             | 261.7 |
| 2008–2012       | 4.4             | 43.2             | 116.0 | 4.2             | 52.8             | 127.3 | 1.0             | 13.2             | 97.6  | 5.6             | 36.2             | 188.0 |



Secondary Medical Zone ID: 136

|                 | Male            |                  |       |                 |                  |       | Female          |                  |       |                 |                  |       |
|-----------------|-----------------|------------------|-------|-----------------|------------------|-------|-----------------|------------------|-------|-----------------|------------------|-------|
|                 | Suicide         |                  |       | Suicide         |                  |       | Suicide         |                  |       | Suicide         |                  |       |
|                 | Num<br>per year | Rate<br>/100,000 | × 100 | Num<br>per year | Rate<br>/100,000 | × 100 | Num<br>per year | Rate<br>/100,000 | × 100 | Num<br>per year | Rate<br>/100,000 | × 100 |
|                 |                 |                  |       |                 |                  |       |                 |                  |       |                 |                  |       |
| Total (>10 y/o) | 45–54           | Total (>10 y/o)  | 45–54 |                 |                  |       |                 |                  |       |                 |                  |       |
| 1983–1987       | 69.6            | 34.9             | 108.7 | 20.2            | 62.5             | 123.5 | 36.8            | 15.7             | 103.9 | 6.0             | 17.8             | 103.2 |
| 1988–1992       | 56.4            | 25.8             | 106.2 | 13.4            | 38.3             | 111.5 | 36.6            | 13.3             | 107.2 | 5.2             | 14.6             | 99.9  |
| 1993–1997       | 60.8            | 25.7             | 104.3 | 16.6            | 41.2             | 112.5 | 32.2            | 10.9             | 104.0 | 4.2             | 11.3             | 87.1  |
| 1998–2002       | 92.6            | 37.0             | 106.2 | 23.0            | 59.4             | 106.1 | 36.8            | 12.6             | 100.3 | 4.4             | 12.6             | 83.5  |
| 2003–2007       | 90.6            | 36.8             | 102.9 | 15.6            | 49.5             | 88.5  | 35.6            | 12.5             | 101.4 | 4.2             | 13.2             | 96.3  |
| 2008–2012       | 76.6            | 33.4             | 94.7  | 12.0            | 42.8             | 88.0  | 38.6            | 13.0             | 109.6 | 2.2             | 10.1             | 67.8  |
|                 | 15–24           |                  |       | 55–64           |                  |       | 15–24           |                  |       | 55–64           |                  |       |
| 1983–1987       | 4.6             | 15.1             | 108.5 | 10.8            | 43.1             | 101.4 | 3.0             | 8.7              | 126.8 | 5.4             | 19.0             | 96.2  |
| 1988–1992       | 4.2             | 11.4             | 115.5 | 9.4             | 33.1             | 93.1  | 2.2             | 6.0              | 114.3 | 7.2             | 21.1             | 118.2 |
| 1993–1997       | 3.2             | 10.0             | 88.2  | 11.6            | 38.7             | 96.0  | 1.4             | 4.6              | 88.3  | 7.8             | 21.4             | 134.9 |
| 1998–2002       | 5.2             | 16.8             | 106.1 | 20.8            | 63.3             | 99.7  | 2.6             | 8.3              | 118.0 | 5.6             | 16.8             | 89.4  |
| 2003–2007       | 4.6             | 17.6             | 100.9 | 22.2            | 59.0             | 102.3 | 1.2             | 6.6              | 73.0  | 6.8             | 17.0             | 101.7 |
| 2008–2012       | 5.0             | 21.5             | 101.6 | 16.6            | 45.4             | 93.4  | 1.2             | 7.2              | 74.6  | 7.2             | 17.2             | 115.3 |
|                 | 25–34           |                  |       | 65–74           |                  |       | 25–34           |                  |       | 65–74           |                  |       |
| 1983–1987       | 8.2             | 27.1             | 105.9 | 4.6             | 32.5             | 74.3  | 3.0             | 10.1             | 93.4  | 4.8             | 25.0             | 80.0  |
| 1988–1992       | 5.6             | 19.6             | 102.6 | 8.0             | 43.0             | 122.2 | 1.2             | 5.9              | 68.0  | 7.4             | 30.4             | 116.7 |
| 1993–1997       | 7.2             | 22.2             | 113.5 | 7.4             | 33.7             | 105.8 | 2.8             | 8.8              | 105.4 | 4.8             | 18.0             | 92.2  |
| 1998–2002       | 10.6            | 29.1             | 107.9 | 10.8            | 43.8             | 96.3  | 4.0             | 11.6             | 100.4 | 6.8             | 22.1             | 105.1 |
| 2003–2007       | 13.4            | 36.9             | 119.0 | 12.8            | 47.4             | 110.5 | 5.8             | 16.0             | 123.0 | 7.2             | 21.6             | 116.2 |
| 2008–2012       | 9.2             | 31.9             | 98.1  | 9.6             | 34.6             | 87.7  | 5.8             | 18.6             | 130.0 | 8.6             | 23.3             | 130.7 |
|                 | 35–44           |                  |       | >74 y/o         |                  |       | 35–44           |                  |       | >74 y/o         |                  |       |
| 1983–1987       | 15.0            | 36.8             | 115.7 | 6.2             | 80.7             | 103.0 | 5.2             | 12.4             | 105.0 | 9.2             | 72.6             | 125.8 |
| 1988–1992       | 9.8             | 25.3             | 106.9 | 6.0             | 58.1             | 90.1  | 3.2             | 8.8              | 90.6  | 9.6             | 52.3             | 109.2 |
| 1993–1997       | 6.8             | 21.7             | 88.4  | 8.0             | 61.7             | 118.5 | 1.8             | 6.6              | 77.1  | 9.0             | 39.1             | 113.7 |
| 1998–2002       | 10.6            | 35.2             | 99.8  | 11.2            | 70.4             | 133.6 | 3.2             | 10.5             | 101.8 | 10.0            | 35.7             | 114.9 |
| 2003–2007       | 12.4            | 38.6             | 96.4  | 9.6             | 49.5             | 109.8 | 2.8             | 10.3             | 81.3  | 7.6             | 22.6             | 100.9 |
| 2008–2012       | 16.0            | 41.9             | 112.6 | 8.2             | 37.2             | 89.6  | 3.8             | 11.8             | 87.0  | 9.8             | 24.0             | 124.8 |

Secondary Medical Zone ID: 137

|                 | Male            |                  |       |                 |                  |       | Female          |                  |       |                 |                  |       |
|-----------------|-----------------|------------------|-------|-----------------|------------------|-------|-----------------|------------------|-------|-----------------|------------------|-------|
|                 | Suicide         |                  |       | Suicide         |                  |       | Suicide         |                  |       | Suicide         |                  |       |
|                 | Num<br>per year | Rate<br>/100,000 | × 100 | Num<br>per year | Rate<br>/100,000 | × 100 | Num<br>per year | Rate<br>/100,000 | × 100 | Num<br>per year | Rate<br>/100,000 | × 100 |
|                 |                 |                  |       |                 |                  |       |                 |                  |       |                 |                  |       |
| Total (>10 y/o) | 45–54           | Total (>10 y/o)  | 45–54 |                 |                  |       |                 |                  |       |                 |                  |       |
| 1983–1987       | 49.4            | 34.4             | 108.0 | 13.0            | 57.7             | 114.1 | 30.6            | 16.8             | 115.8 | 5.4             | 20.6             | 119.8 |
| 1988–1992       | 39.0            | 25.3             | 105.2 | 8.8             | 36.5             | 106.1 | 28.8            | 14.3             | 116.9 | 4.4             | 16.4             | 112.1 |
| 1993–1997       | 42.8            | 26.0             | 107.3 | 10.4            | 37.3             | 101.9 | 23.8            | 11.2             | 109.6 | 2.8             | 11.2             | 86.4  |
| 1998–2002       | 66.0            | 37.9             | 112.0 | 18.4            | 67.0             | 119.7 | 28.0            | 13.2             | 109.7 | 4.4             | 15.7             | 104.4 |
| 2003–2007       | 66.6            | 39.0             | 114.4 | 10.8            | 52.4             | 93.7  | 27.2            | 13.4             | 112.9 | 4.0             | 16.2             | 118.4 |
| 2008–2012       | 55.4            | 36.2             | 105.6 | 6.2             | 38.2             | 78.7  | 23.8            | 13.5             | 104.3 | 1.6             | 11.5             | 77.2  |
|                 | 15–24           |                  |       | 55–64           |                  |       | 15–24           |                  |       | 55–64           |                  |       |
| 1983–1987       | 3.4             | 16.5             | 118.3 | 10.6            | 54.2             | 127.5 | 1.8             | 7.8              | 113.5 | 4.8             | 21.6             | 109.6 |
| 1988–1992       | 0.8             | 6.7              | 67.3  | 10.0            | 46.0             | 129.4 | 2.0             | 7.1              | 134.6 | 6.6             | 24.7             | 138.2 |
| 1993–1997       | 1.8             | 9.7              | 85.8  | 10.2            | 46.8             | 116.2 | 1.0             | 5.0              | 95.0  | 3.6             | 15.6             | 98.4  |
| 1998–2002       | 3.6             | 18.0             | 114.0 | 17.2            | 73.8             | 116.2 | 1.8             | 8.5              | 121.4 | 5.2             | 20.4             | 108.6 |
| 2003–2007       | 2.8             | 18.2             | 104.5 | 20.0            | 72.9             | 126.4 | 1.4             | 9.5              | 105.5 | 4.4             | 16.4             | 97.7  |
| 2008–2012       | 3.4             | 24.1             | 113.4 | 11.2            | 44.9             | 92.4  | 1.4             | 10.6             | 108.8 | 4.2             | 15.3             | 102.4 |
|                 | 25–34           |                  |       | 65–74           |                  |       | 25–34           |                  |       | 65–74           |                  |       |
| 1983–1987       | 6.4             | 29.8             | 116.5 | 2.8             | 29.0             | 66.3  | 1.4             | 8.2              | 76.3  | 6.0             | 36.5             | 116.7 |
| 1988–1992       | 3.6             | 19.4             | 101.3 | 4.0             | 31.7             | 90.0  | 1.8             | 9.0              | 103.7 | 4.0             | 23.6             | 90.5  |
| 1993–1997       | 3.2             | 17.7             | 90.6  | 5.6             | 34.9             | 109.5 | 1.4             | 7.7              | 93.1  | 5.8             | 26.7             | 137.2 |
| 1998–2002       | 4.4             | 22.6             | 83.7  | 10.6            | 56.7             | 124.6 | 2.0             | 10.5             | 90.6  | 5.2             | 23.2             | 110.6 |
| 2003–2007       | 7.2             | 32.9             | 106.1 | 9.4             | 49.7             | 115.8 | 3.0             | 14.0             | 108.0 | 5.0             | 21.4             | 114.9 |
| 2008–2012       | 7.8             | 40.3             | 123.7 | 7.8             | 39.8             | 100.7 | 3.0             | 16.4             | 114.7 | 5.6             | 22.1             | 124.0 |
|                 | 35–44           |                  |       | >74 y/o         |                  |       | 35–44           |                  |       | >74 y/o         |                  |       |
| 1983–1987       | 9.2             | 31.7             | 99.7  | 4.0             | 71.9             | 91.8  | 4.4             | 13.8             | 116.5 | 6.8             | 70.3             | 121.8 |
| 1988–1992       | 7.6             | 27.1             | 114.4 | 4.0             | 55.3             | 85.8  | 3.4             | 11.1             | 115.3 | 6.6             | 50.3             | 105.1 |
| 1993–1997       | 5.6             | 25.8             | 105.3 | 6.0             | 63.3             | 121.6 | 1.6             | 7.8              | 91.4  | 7.6             | 45.5             | 132.1 |
| 1998–2002       | 4.8             | 27.9             | 79.3  | 6.8             | 59.7             | 113.2 | 1.4             | 8.7              | 83.8  | 8.0             | 39.0             | 125.7 |
| 2003–2007       | 7.8             | 40.3             | 100.7 | 8.6             | 59.2             | 131.4 | 1.8             | 10.9             | 86.7  | 7.6             | 30.2             | 134.5 |
| 2008–2012       | 11.0            | 45.5             | 122.3 | 7.6             | 46.3             | 111.6 | 3.6             | 15.4             | 113.4 | 4.4             | 16.5             | 85.6  |

Secondary Medical Zone ID: 138

|           | Male            |          |       |          |          |       | Female          |          |       |          |          |       |
|-----------|-----------------|----------|-------|----------|----------|-------|-----------------|----------|-------|----------|----------|-------|
|           | Suicide         |          |       | Suicide  |          |       | Suicide         |          |       | Suicide  |          |       |
|           | Num             | Rate     | × 100 | Num      | Rate     | × 100 | Num             | Rate     | × 100 | Num      | Rate     | × 100 |
|           | per year        | /100,000 |       | per year | /100,000 |       | per year        | /100,000 |       | per year | /100,000 |       |
|           | Total (>10 y/o) |          |       | 45–54    |          |       | Total (>10 y/o) |          |       | 45–54    |          |       |
| 1983–1987 | 28.8            | 39.2     | 135.3 | 7.2      | 68.6     | 135.7 | 17.2            | 18.1     | 132.1 | 3.0      | 22.1     | 128.2 |
| 1988–1992 | 24.2            | 29.5     | 139.4 | 3.4      | 35.6     | 103.7 | 17.6            | 15.7     | 144.5 | 2.4      | 17.9     | 122.2 |
| 1993–1997 | 22.6            | 28.2     | 125.0 | 4.4      | 38.0     | 104.0 | 12.0            | 11.8     | 118.6 | 1.6      | 13.6     | 105.4 |
| 1998–2002 | 29.6            | 38.2     | 115.1 | 6.0      | 53.9     | 96.3  | 12.2            | 13.0     | 107.7 | 1.8      | 15.6     | 103.5 |
| 2003–2007 | 31.0            | 39.2     | 121.5 | 5.6      | 58.7     | 105.0 | 15.2            | 14.1     | 131.5 | 1.2      | 13.4     | 97.8  |
| 2008–2012 | 27.6            | 37.3     | 117.6 | 4.0      | 49.7     | 102.3 | 9.6             | 12.7     | 99.9  | 0.6      | 12.4     | 83.3  |
| -----     |                 |          |       |          |          |       |                 |          |       |          |          |       |
|           | 15–24           |          |       | 55–64    |          |       | 15–24           |          |       | 55–64    |          |       |
| 1983–1987 | 1.0             | 13.6     | 97.8  | 6.6      | 60.7     | 142.9 | 1.6             | 10.5     | 153.9 | 2.0      | 19.8     | 100.3 |
| 1988–1992 | 1.0             | 10.5     | 106.4 | 5.8      | 50.8     | 143.0 | 0.4             | 5.1      | 96.9  | 2.8      | 21.5     | 120.2 |
| 1993–1997 | 1.0             | 11.5     | 101.7 | 5.2      | 50.1     | 124.4 | 1.0             | 7.1      | 136.1 | 2.6      | 20.2     | 127.3 |
| 1998–2002 | 1.0             | 15.0     | 95.2  | 6.0      | 65.8     | 103.6 | 0.8             | 8.1      | 114.8 | 1.4      | 17.2     | 91.4  |
| 2003–2007 | 1.0             | 17.0     | 97.7  | 5.4      | 53.0     | 91.8  | 1.0             | 11.2     | 124.8 | 3.2      | 21.4     | 128.0 |
| 2008–2012 | 1.2             | 21.7     | 102.4 | 5.4      | 48.2     | 99.3  | 0.6             | 10.4     | 107.0 | 1.6      | 14.8     | 99.2  |
| -----     |                 |          |       |          |          |       |                 |          |       |          |          |       |
|           | 25–34           |          |       | 65–74    |          |       | 25–34           |          |       | 65–74    |          |       |
| 1983–1987 | 3.4             | 32.0     | 125.1 | 3.4      | 53.1     | 121.3 | 2.0             | 15.0     | 139.4 | 3.0      | 36.2     | 115.8 |
| 1988–1992 | 1.2             | 17.4     | 91.2  | 3.6      | 46.6     | 132.2 | 1.2             | 10.6     | 122.5 | 4.0      | 39.9     | 152.8 |
| 1993–1997 | 2.0             | 22.6     | 115.8 | 3.0      | 36.1     | 113.2 | 0.2             | 6.7      | 80.9  | 2.4      | 23.0     | 117.8 |
| 1998–2002 | 3.6             | 34.0     | 125.9 | 4.8      | 52.8     | 116.0 | 0.4             | 9.7      | 83.5  | 3.4      | 27.6     | 131.2 |
| 2003–2007 | 2.8             | 32.1     | 103.4 | 5.8      | 60.9     | 141.9 | 1.0             | 12.9     | 99.1  | 2.6      | 22.4     | 120.3 |
| 2008–2012 | 4.0             | 41.0     | 125.8 | 4.6      | 49.3     | 124.9 | 0.6             | 12.9     | 90.0  | 2.6      | 21.8     | 122.7 |
| -----     |                 |          |       |          |          |       |                 |          |       |          |          |       |
|           | 35–44           |          |       | >74 y/o  |          |       | 35–44           |          |       | >74 y/o  |          |       |
| 1983–1987 | 3.6             | 31.9     | 100.3 | 3.4      | 98.1     | 125.2 | 1.4             | 12.2     | 103.4 | 4.2      | 75.6     | 131.0 |
| 1988–1992 | 4.4             | 32.2     | 135.9 | 4.8      | 102.0    | 158.1 | 1.0             | 9.5      | 98.5  | 5.8      | 76.8     | 160.4 |
| 1993–1997 | 2.6             | 26.2     | 106.9 | 4.4      | 80.9     | 155.3 | 0.6             | 7.8      | 91.5  | 3.6      | 42.4     | 123.0 |
| 1998–2002 | 3.2             | 37.6     | 106.7 | 4.8      | 73.1     | 138.7 | 0.6             | 9.4      | 90.5  | 3.6      | 35.6     | 114.6 |
| 2003–2007 | 3.6             | 44.0     | 109.7 | 6.8      | 78.1     | 173.4 | 1.0             | 12.7     | 100.7 | 5.2      | 38.0     | 169.4 |
| 2008–2012 | 3.8             | 40.4     | 108.7 | 4.4      | 49.4     | 119.2 | 0.8             | 12.5     | 92.2  | 2.8      | 20.1     | 104.3 |

Secondary Medical Zone ID: 139

|                 | Male            |                  |       |                 |                  |       | Female          |                  |       |                 |                  |       |
|-----------------|-----------------|------------------|-------|-----------------|------------------|-------|-----------------|------------------|-------|-----------------|------------------|-------|
|                 | Suicide         |                  |       | Suicide         |                  |       | Suicide         |                  |       | Suicide         |                  |       |
|                 | Num<br>per year | Rate<br>/100,000 | × 100 | Num<br>per year | Rate<br>/100,000 | × 100 | Num<br>per year | Rate<br>/100,000 | × 100 | Num<br>per year | Rate<br>/100,000 | × 100 |
|                 |                 |                  |       |                 |                  |       |                 |                  |       |                 |                  |       |
| Total (>10 y/o) | 45–54           | Total (>10 y/o)  | 45–54 |                 |                  |       |                 |                  |       |                 |                  |       |
| 1983–1987       | 27.8            | 32.1             | 96.2  | 6.2             | 46.5             | 92.0  | 14.8            | 14.3             | 91.1  | 1.8             | 14.3             | 83.2  |
| 1988–1992       | 23.4            | 24.2             | 97.7  | 6.6             | 39.6             | 115.4 | 16.0            | 12.6             | 101.1 | 2.6             | 15.0             | 102.5 |
| 1993–1997       | 28.6            | 25.7             | 107.2 | 8.2             | 41.9             | 114.6 | 13.8            | 10.7             | 97.1  | 3.0             | 14.2             | 109.9 |
| 1998–2002       | 44.8            | 38.3             | 111.9 | 8.8             | 52.1             | 93.1  | 18.4            | 13.1             | 106.2 | 4.0             | 18.3             | 121.4 |
| 2003–2007       | 44.6            | 39.0             | 110.5 | 8.8             | 60.3             | 107.7 | 12.0            | 11.1             | 81.0  | 2.0             | 13.4             | 98.0  |
| 2008–2012       | 36.6            | 34.6             | 99.4  | 6.6             | 49.3             | 101.5 | 15.2            | 13.0             | 97.1  | 2.0             | 14.6             | 97.9  |
|                 | 15–24           |                  |       | 55–64           |                  |       | 15–24           |                  |       | 55–64           |                  |       |
| 1983–1987       | 2.8             | 18.0             | 129.1 | 4.4             | 40.2             | 94.6  | 1.0             | 6.8              | 100.1 | 1.8             | 16.2             | 82.1  |
| 1988–1992       | 1.2             | 9.0              | 91.3  | 5.4             | 40.4             | 113.7 | 0.4             | 4.1              | 77.5  | 2.0             | 15.7             | 87.8  |
| 1993–1997       | 2.0             | 12.1             | 106.7 | 7.0             | 47.8             | 118.9 | 1.2             | 6.3              | 120.6 | 2.4             | 15.9             | 99.8  |
| 1998–2002       | 2.2             | 16.3             | 103.5 | 14.8            | 88.5             | 139.2 | 1.8             | 9.7              | 138.2 | 4.0             | 21.6             | 114.8 |
| 2003–2007       | 2.4             | 19.2             | 109.8 | 12.8            | 69.4             | 120.2 | 0.6             | 7.6              | 84.4  | 3.0             | 16.4             | 97.9  |
| 2008–2012       | 2.6             | 23.4             | 110.2 | 9.0             | 51.8             | 106.5 | 1.2             | 10.8             | 111.5 | 2.0             | 13.1             | 87.8  |
|                 | 25–34           |                  |       | 65–74           |                  |       | 25–34           |                  |       | 65–74           |                  |       |
| 1983–1987       | 2.2             | 19.8             | 77.6  | 3.4             | 46.1             | 105.3 | 1.6             | 10.9             | 101.3 | 4.6             | 41.3             | 132.1 |
| 1988–1992       | 2.6             | 19.5             | 101.8 | 2.0             | 28.6             | 81.1  | 1.0             | 8.0              | 92.6  | 2.2             | 21.8             | 83.7  |
| 1993–1997       | 2.2             | 17.1             | 87.7  | 3.8             | 36.4             | 114.1 | 0.6             | 6.5              | 78.2  | 2.0             | 17.2             | 88.5  |
| 1998–2002       | 4.6             | 27.7             | 102.6 | 5.2             | 46.6             | 102.6 | 1.6             | 10.8             | 93.3  | 3.4             | 23.5             | 111.7 |
| 2003–2007       | 4.0             | 27.1             | 87.5  | 4.8             | 41.5             | 96.6  | 1.4             | 11.2             | 85.9  | 2.2             | 17.0             | 91.3  |
| 2008–2012       | 4.6             | 33.6             | 103.3 | 5.2             | 39.1             | 99.0  | 1.6             | 13.8             | 96.0  | 4.0             | 22.1             | 124.1 |
|                 | 35–44           |                  |       | >74 y/o         |                  |       | 35–44           |                  |       | >74 y/o         |                  |       |
| 1983–1987       | 4.8             | 27.3             | 85.7  | 4.0             | 98.3             | 125.5 | 1.8             | 10.4             | 88.4  | 2.2             | 42.2             | 73.2  |
| 1988–1992       | 3.2             | 20.1             | 84.9  | 2.4             | 53.9             | 83.6  | 1.6             | 9.2              | 95.4  | 6.2             | 69.5             | 145.2 |
| 1993–1997       | 2.4             | 19.2             | 78.4  | 2.8             | 49.6             | 95.2  | 1.6             | 9.4              | 110.2 | 3.0             | 29.7             | 86.3  |
| 1998–2002       | 5.0             | 36.0             | 102.2 | 4.2             | 57.6             | 109.2 | 0.6             | 7.5              | 72.3  | 3.0             | 24.8             | 79.8  |
| 2003–2007       | 6.8             | 44.7             | 111.5 | 4.8             | 52.0             | 115.4 | 0.6             | 8.7              | 69.0  | 2.2             | 15.9             | 70.9  |
| 2008–2012       | 5.0             | 32.9             | 88.5  | 3.6             | 37.5             | 90.4  | 2.4             | 14.0             | 103.4 | 2.0             | 13.5             | 70.0  |

Secondary Medical Zone ID: 140

|           | Male            |          |       |          |          |       | Female          |          |       |          |          |       |
|-----------|-----------------|----------|-------|----------|----------|-------|-----------------|----------|-------|----------|----------|-------|
|           | Suicide         |          |       | Suicide  |          |       | Suicide         |          |       | Suicide  |          |       |
|           | Num             | Rate     | × 100 | Num      | Rate     | × 100 | Num             | Rate     | × 100 | Num      | Rate     | × 100 |
|           | per year        | /100,000 |       | per year | /100,000 |       | per year        | /100,000 |       | per year | /100,000 |       |
|           | Total (>10 y/o) |          |       | 45–54    |          |       | Total (>10 y/o) |          |       | 45–54    |          |       |
| 1983–1987 | 78.4            | 32.5     | 99.4  | 20.4     | 56.4     | 111.4 | 38.4            | 14.2     | 91.7  | 6.6      | 17.4     | 101.2 |
| 1988–1992 | 58.2            | 22.0     | 87.6  | 11.8     | 28.7     | 83.6  | 37.8            | 12.1     | 92.5  | 7.6      | 16.7     | 114.4 |
| 1993–1997 | 64.2            | 22.1     | 85.8  | 15.6     | 30.7     | 83.9  | 25.4            | 8.2      | 69.3  | 4.4      | 9.6      | 74.6  |
| 1998–2002 | 101.2           | 32.4     | 88.7  | 25.6     | 49.7     | 88.8  | 39.2            | 11.6     | 85.3  | 7.0      | 13.8     | 91.8  |
| 2003–2007 | 109.0           | 34.0     | 91.6  | 24.4     | 54.8     | 97.9  | 41.6            | 11.5     | 90.4  | 6.2      | 13.6     | 99.5  |
| 2008–2012 | 103.4           | 32.0     | 92.0  | 17.6     | 43.0     | 88.4  | 39.2            | 11.6     | 85.1  | 4.0      | 10.8     | 72.3  |
|           | 15–24           |          |       | 55–64    |          |       | 15–24           |          |       | 55–64    |          |       |
| 1983–1987 | 6.0             | 12.9     | 92.3  | 11.4     | 41.7     | 98.1  | 2.2             | 5.4      | 79.7  | 5.4      | 17.6     | 89.2  |
| 1988–1992 | 5.4             | 9.6      | 96.5  | 11.2     | 35.0     | 98.6  | 2.6             | 5.0      | 94.2  | 6.2      | 17.5     | 98.0  |
| 1993–1997 | 5.0             | 9.0      | 79.9  | 13.4     | 39.0     | 96.8  | 1.8             | 3.8      | 73.3  | 4.0      | 11.9     | 74.9  |
| 1998–2002 | 7.2             | 14.0     | 88.6  | 25.2     | 62.9     | 99.0  | 3.8             | 7.8      | 110.5 | 6.2      | 15.9     | 84.3  |
| 2003–2007 | 7.6             | 16.5     | 94.7  | 28.0     | 56.9     | 98.5  | 3.4             | 8.5      | 94.7  | 7.8      | 15.7     | 93.6  |
| 2008–2012 | 6.8             | 17.5     | 82.5  | 25.2     | 49.8     | 102.6 | 2.4             | 7.5      | 77.1  | 6.0      | 12.4     | 83.4  |
|           | 25–34           |          |       | 65–74    |          |       | 25–34           |          |       | 65–74    |          |       |
| 1983–1987 | 9.8             | 22.8     | 89.1  | 7.8      | 45.7     | 104.4 | 5.4             | 11.6     | 107.9 | 7.6      | 32.7     | 104.7 |
| 1988–1992 | 7.4             | 17.6     | 92.2  | 6.4      | 33.0     | 93.7  | 3.4             | 8.0      | 91.9  | 7.6      | 28.2     | 108.2 |
| 1993–1997 | 7.0             | 16.0     | 81.8  | 8.4      | 34.3     | 107.6 | 3.8             | 8.1      | 97.2  | 3.6      | 13.2     | 67.9  |
| 1998–2002 | 13.4            | 26.1     | 96.6  | 11.0     | 40.6     | 89.2  | 6.2             | 11.7     | 101.2 | 4.8      | 15.7     | 74.5  |
| 2003–2007 | 15.8            | 30.8     | 99.2  | 10.4     | 35.5     | 82.7  | 7.0             | 13.4     | 103.4 | 5.4      | 15.9     | 85.3  |
| 2008–2012 | 13.8            | 31.7     | 97.3  | 14.2     | 40.1     | 101.5 | 6.6             | 14.8     | 103.1 | 6.0      | 15.8     | 89.0  |
|           | 35–44           |          |       | >74 y/o  |          |       | 35–44           |          |       | >74 y/o  |          |       |
| 1983–1987 | 15.8            | 29.5     | 92.7  | 6.8      | 81.3     | 103.8 | 6.2             | 11.5     | 97.7  | 4.8      | 38.0     | 65.9  |
| 1988–1992 | 10.0            | 19.5     | 82.2  | 5.6      | 51.3     | 79.5  | 4.6             | 8.9      | 92.4  | 5.8      | 30.4     | 63.4  |
| 1993–1997 | 9.8             | 21.7     | 88.4  | 4.8      | 37.2     | 71.5  | 3.0             | 7.0      | 82.3  | 4.8      | 20.3     | 59.1  |
| 1998–2002 | 13.0            | 30.6     | 87.0  | 5.0      | 33.2     | 63.1  | 4.6             | 10.3     | 100.0 | 6.4      | 21.5     | 69.1  |
| 2003–2007 | 16.2            | 35.8     | 89.3  | 6.6      | 32.7     | 72.6  | 3.4             | 8.8      | 69.3  | 8.2      | 21.4     | 95.4  |
| 2008–2012 | 17.8            | 34.4     | 92.4  | 8.0      | 32.4     | 78.0  | 8.0             | 14.7     | 108.1 | 6.0      | 13.9     | 72.3  |

Secondary Medical Zone ID: 141

|                 | Male            |                  |       |                 |                  |       | Female          |                  |       |                 |                  |       |
|-----------------|-----------------|------------------|-------|-----------------|------------------|-------|-----------------|------------------|-------|-----------------|------------------|-------|
|                 | Suicide         |                  |       | Suicide         |                  |       | Suicide         |                  |       | Suicide         |                  |       |
|                 | Num<br>per year | Rate<br>/100,000 | × 100 | Num<br>per year | Rate<br>/100,000 | × 100 | Num<br>per year | Rate<br>/100,000 | × 100 | Num<br>per year | Rate<br>/100,000 | × 100 |
|                 |                 |                  |       |                 |                  |       |                 |                  |       |                 |                  |       |
| Total (>10 y/o) | 45–54           | Total (>10 y/o)  | 45–54 |                 |                  |       |                 |                  |       |                 |                  |       |
| 1983–1987       | 25.4            | 35.0             | 111.3 | 5.6             | 52.8             | 104.5 | 14.6            | 15.8             | 107.3 | 2.2             | 18.0             | 104.7 |
| 1988–1992       | 23.0            | 28.1             | 123.8 | 3.8             | 35.0             | 101.9 | 12.4            | 12.9             | 101.4 | 1.6             | 14.5             | 99.1  |
| 1993–1997       | 18.2            | 24.9             | 98.2  | 4.8             | 37.8             | 103.2 | 12.0            | 11.4             | 110.5 | 1.0             | 11.0             | 85.4  |
| 1998–2002       | 25.2            | 35.0             | 95.6  | 4.2             | 41.9             | 74.9  | 10.0            | 11.8             | 89.3  | 1.4             | 13.7             | 91.0  |
| 2003–2007       | 25.2            | 35.5             | 98.1  | 4.0             | 45.2             | 80.9  | 12.2            | 13.5             | 109.0 | 1.8             | 15.2             | 110.9 |
| 2008–2012       | 22.2            | 34.7             | 98.8  | 3.8             | 47.9             | 98.6  | 10.4            | 13.0             | 102.7 | 1.4             | 15.7             | 105.0 |
|                 | 15–24           |                  |       | 55–64           |                  |       | 15–24           |                  |       | 55–64           |                  |       |
| 1983–1987       | 1.8             | 17.0             | 122.0 | 5.4             | 51.5             | 121.2 | 0.2             | 5.4              | 79.2  | 3.0             | 22.9             | 116.0 |
| 1988–1992       | 1.2             | 10.9             | 109.8 | 4.0             | 38.1             | 107.2 | 1.0             | 6.9              | 130.8 | 2.6             | 19.7             | 110.3 |
| 1993–1997       | 1.0             | 11.3             | 99.8  | 3.8             | 39.3             | 97.6  | 0.2             | 4.4              | 84.0  | 2.8             | 20.2             | 126.9 |
| 1998–2002       | 2.0             | 19.6             | 124.3 | 8.0             | 73.3             | 115.4 | 0.2             | 6.0              | 85.5  | 1.4             | 16.4             | 87.2  |
| 2003–2007       | 0.8             | 16.5             | 94.4  | 5.8             | 51.9             | 89.9  | 1.0             | 11.4             | 126.2 | 2.6             | 18.6             | 110.9 |
| 2008–2012       | 1.4             | 23.3             | 109.7 | 5.0             | 44.6             | 91.7  | 0.0             | 7.2              | 74.4  | 2.4             | 16.6             | 111.6 |
|                 | 25–34           |                  |       | 65–74           |                  |       | 25–34           |                  |       | 65–74           |                  |       |
| 1983–1987       | 2.8             | 27.4             | 107.3 | 3.4             | 49.2             | 112.4 | 2.4             | 16.0             | 148.8 | 3.0             | 33.3             | 106.5 |
| 1988–1992       | 3.2             | 28.9             | 151.4 | 4.6             | 52.2             | 148.1 | 1.0             | 9.7              | 111.5 | 1.4             | 18.8             | 72.0  |
| 1993–1997       | 2.0             | 22.3             | 114.0 | 2.6             | 32.1             | 100.6 | 0.4             | 7.4              | 89.3  | 3.0             | 24.7             | 126.8 |
| 1998–2002       | 2.8             | 30.3             | 112.2 | 3.6             | 43.4             | 95.3  | 0.4             | 9.8              | 84.6  | 2.6             | 22.3             | 106.3 |
| 2003–2007       | 3.0             | 34.7             | 112.0 | 5.0             | 51.7             | 120.4 | 1.2             | 14.1             | 108.3 | 1.4             | 16.0             | 86.2  |
| 2008–2012       | 3.0             | 38.4             | 117.9 | 3.0             | 36.7             | 92.9  | 0.8             | 14.3             | 99.9  | 1.6             | 17.0             | 95.6  |
|                 | 35–44           |                  |       | >74 y/o         |                  |       | 35–44           |                  |       | >74 y/o         |                  |       |
| 1983–1987       | 3.8             | 30.3             | 95.1  | 2.4             | 73.9             | 94.3  | 2.2             | 14.0             | 118.8 | 1.6             | 36.1             | 62.7  |
| 1988–1992       | 3.0             | 23.8             | 100.5 | 3.2             | 72.5             | 112.4 | 1.6             | 10.8             | 112.2 | 3.2             | 44.8             | 93.5  |
| 1993–1997       | 2.2             | 22.9             | 93.3  | 1.6             | 38.5             | 74.0  | 1.6             | 11.1             | 131.1 | 3.0             | 33.8             | 98.3  |
| 1998–2002       | 2.6             | 32.8             | 93.1  | 2.0             | 40.3             | 76.5  | 1.0             | 10.8             | 104.8 | 3.0             | 28.8             | 92.6  |
| 2003–2007       | 3.4             | 42.5             | 106.1 | 3.2             | 44.9             | 99.6  | 1.2             | 13.5             | 107.1 | 3.0             | 23.0             | 102.5 |
| 2008–2012       | 2.2             | 33.3             | 89.5  | 3.8             | 45.3             | 109.1 | 1.4             | 14.9             | 109.6 | 2.8             | 19.3             | 100.2 |

Secondary Medical Zone ID: 142

|           | Male            |                  |       |                 |                  |       | Female          |                  |       |                 |                  |       |
|-----------|-----------------|------------------|-------|-----------------|------------------|-------|-----------------|------------------|-------|-----------------|------------------|-------|
|           | Suicide         |                  |       | Suicide         |                  |       | Suicide         |                  |       | Suicide         |                  |       |
|           | Num<br>per year | Rate<br>/100,000 | × 100 | Num<br>per year | Rate<br>/100,000 | × 100 | Num<br>per year | Rate<br>/100,000 | × 100 | Num<br>per year | Rate<br>/100,000 | × 100 |
|           |                 |                  |       |                 |                  |       |                 |                  |       |                 |                  |       |
|           | Total (>10 y/o) |                  |       | 45–54           |                  |       | Total (>10 y/o) |                  |       | 45–54           |                  |       |
| 1983–1987 | 15.2            | 31.6             | 95.8  | 2.8             | 42.1             | 83.2  | 11.6            | 16.1             | 111.4 | 2.2             | 20.1             | 116.6 |
| 1988–1992 | 14.2            | 26.3             | 112.6 | 2.2             | 33.8             | 98.4  | 8.6             | 12.7             | 98.7  | 0.4             | 12.0             | 82.0  |
| 1993–1997 | 15.2            | 27.9             | 119.5 | 4.0             | 45.5             | 124.2 | 7.4             | 11.0             | 101.6 | 1.4             | 14.6             | 112.7 |
| 1998–2002 | 20.2            | 39.7             | 117.3 | 3.4             | 52.4             | 93.6  | 7.0             | 12.4             | 93.7  | 1.0             | 14.8             | 98.6  |
| 2003–2007 | 21.0            | 42.6             | 130.1 | 6.4             | 88.9             | 158.9 | 6.4             | 12.4             | 97.7  | 0.6             | 13.0             | 94.8  |
| 2008–2012 | 17.2            | 38.2             | 121.9 | 3.4             | 59.5             | 122.3 | 7.0             | 13.0             | 107.6 | 1.2             | 17.6             | 118.3 |
|           | 15–24           |                  |       | 55–64           |                  |       | 15–24           |                  |       | 55–64           |                  |       |
| 1983–1987 | 1.0             | 15.8             | 113.5 | 3.4             | 43.2             | 101.7 | 0.2             | 6.3              | 92.3  | 2.8             | 24.5             | 124.1 |
| 1988–1992 | 0.2             | 8.8              | 89.0  | 4.4             | 46.8             | 131.9 | 0.4             | 5.9              | 111.8 | 1.4             | 16.6             | 93.0  |
| 1993–1997 | 0.8             | 12.6             | 111.8 | 2.6             | 38.8             | 96.5  | 0.6             | 6.8              | 129.8 | 0.8             | 13.3             | 83.5  |
| 1998–2002 | 1.2             | 19.2             | 121.6 | 4.8             | 70.6             | 111.1 | 0.8             | 9.4              | 133.1 | 1.2             | 18.1             | 96.0  |
| 2003–2007 | 1.0             | 19.9             | 114.1 | 3.4             | 54.0             | 93.5  | 0.2             | 8.9              | 98.8  | 0.8             | 15.2             | 90.8  |
| 2008–2012 | 1.0             | 24.4             | 114.8 | 3.8             | 51.3             | 105.7 | 0.0             | 8.5              | 87.9  | 1.2             | 15.5             | 103.8 |
|           | 25–34           |                  |       | 65–74           |                  |       | 25–34           |                  |       | 65–74           |                  |       |
| 1983–1987 | 2.6             | 32.7             | 127.8 | 2.8             | 50.2             | 114.7 | 0.4             | 9.6              | 89.1  | 2.0             | 31.0             | 99.2  |
| 1988–1992 | 1.2             | 21.6             | 112.8 | 2.0             | 35.1             | 99.5  | 0.8             | 10.4             | 119.9 | 2.2             | 28.5             | 109.4 |
| 1993–1997 | 1.4             | 24.4             | 125.1 | 2.4             | 34.3             | 107.4 | 0.2             | 7.9              | 94.7  | 1.2             | 16.6             | 85.3  |
| 1998–2002 | 2.0             | 34.3             | 127.0 | 3.2             | 45.8             | 100.7 | 0.0             | 10.0             | 86.2  | 1.0             | 16.2             | 77.3  |
| 2003–2007 | 1.6             | 36.0             | 116.0 | 3.8             | 52.1             | 121.3 | 0.2             | 12.2             | 93.5  | 1.2             | 17.1             | 91.8  |
| 2008–2012 | 1.8             | 39.1             | 120.0 | 2.4             | 41.2             | 104.2 | 0.0             | 12.7             | 88.8  | 1.6             | 19.5             | 109.6 |
|           | 35–44           |                  |       | >74 y/o         |                  |       | 35–44           |                  |       | >74 y/o         |                  |       |
| 1983–1987 | 1.2             | 23.8             | 74.8  | 1.4             | 63.7             | 81.4  | 1.2             | 12.8             | 108.6 | 2.8             | 60.0             | 103.9 |
| 1988–1992 | 2.6             | 29.1             | 122.6 | 1.6             | 56.0             | 86.8  | 0.8             | 10.0             | 103.3 | 2.6             | 46.4             | 96.9  |
| 1993–1997 | 2.4             | 31.6             | 128.9 | 1.6             | 46.1             | 88.5  | 0.8             | 9.8              | 115.1 | 2.4             | 35.9             | 104.3 |
| 1998–2002 | 3.2             | 49.1             | 139.5 | 2.4             | 52.5             | 99.6  | 0.8             | 11.9             | 114.8 | 2.2             | 28.6             | 92.2  |
| 2003–2007 | 1.8             | 43.6             | 108.8 | 2.8             | 48.0             | 106.5 | 0.8             | 14.2             | 112.1 | 2.6             | 25.6             | 113.9 |
| 2008–2012 | 1.4             | 38.3             | 103.1 | 3.2             | 46.8             | 112.9 | 0.2             | 12.6             | 92.7  | 2.8             | 23.0             | 119.5 |

Secondary Medical Zone ID: 143

|           | Male            |          |       |          |          |       | Female          |          |       |          |          |       |
|-----------|-----------------|----------|-------|----------|----------|-------|-----------------|----------|-------|----------|----------|-------|
|           | Suicide         |          |       | Suicide  |          |       | Suicide         |          |       | Suicide  |          |       |
|           | Num             | Rate     | × 100 | Num      | Rate     | × 100 | Num             | Rate     | × 100 | Num      | Rate     | × 100 |
|           | per year        | /100,000 |       | per year | /100,000 |       | per year        | /100,000 |       | per year | /100,000 |       |
|           | Total (>10 y/o) |          |       | 45–54    |          |       | Total (>10 y/o) |          |       | 45–54    |          |       |
| 1983–1987 | 57.6            | 35.3     | 110.1 | 14.4     | 57.4     | 113.6 | 27.8            | 14.7     | 96.2  | 3.8      | 15.5     | 90.1  |
| 1988–1992 | 43.6            | 24.8     | 102.1 | 9.8      | 37.1     | 108.1 | 27.8            | 12.6     | 101.3 | 3.4      | 13.4     | 91.9  |
| 1993–1997 | 43.4            | 23.8     | 94.4  | 10.2     | 34.8     | 95.0  | 23.0            | 10.1     | 94.4  | 3.4      | 11.9     | 92.0  |
| 1998–2002 | 68.4            | 35.5     | 99.7  | 16.8     | 55.8     | 99.7  | 27.2            | 11.5     | 94.3  | 2.8      | 11.5     | 76.2  |
| 2003–2007 | 66.0            | 34.3     | 95.3  | 14.2     | 53.7     | 96.0  | 27.6            | 12.2     | 99.2  | 3.8      | 13.8     | 101.0 |
| 2008–2012 | 60.6            | 34.5     | 95.5  | 11.0     | 46.0     | 94.6  | 23.8            | 11.9     | 89.8  | 3.8      | 14.9     | 100.1 |
|           | 15–24           |          |       | 55–64    |          |       | 15–24           |          |       | 55–64    |          |       |
| 1983–1987 | 4.4             | 16.3     | 117.0 | 7.0      | 36.5     | 85.9  | 1.0             | 5.2      | 75.6  | 5.2      | 21.3     | 107.9 |
| 1988–1992 | 2.0             | 8.3      | 83.4  | 8.4      | 35.9     | 101.0 | 1.6             | 5.6      | 106.9 | 4.8      | 18.5     | 103.6 |
| 1993–1997 | 4.2             | 13.1     | 116.1 | 7.6      | 34.3     | 85.1  | 1.4             | 5.3      | 101.4 | 3.2      | 13.6     | 85.3  |
| 1998–2002 | 3.6             | 14.6     | 92.2  | 16.6     | 66.5     | 104.7 | 1.0             | 5.6      | 80.3  | 5.8      | 20.7     | 110.1 |
| 2003–2007 | 3.2             | 15.5     | 88.9  | 16.6     | 58.4     | 101.2 | 2.4             | 10.6     | 117.8 | 4.0      | 14.8     | 88.5  |
| 2008–2012 | 6.8             | 29.3     | 138.1 | 12.2     | 43.7     | 90.0  | 1.2             | 8.0      | 82.1  | 4.6      | 15.1     | 101.3 |
|           | 25–34           |          |       | 65–74    |          |       | 25–34           |          |       | 65–74    |          |       |
| 1983–1987 | 5.8             | 23.1     | 90.3  | 6.8      | 53.0     | 121.1 | 2.2             | 9.0      | 83.8  | 6.0      | 34.3     | 109.7 |
| 1988–1992 | 3.2             | 14.5     | 76.0  | 5.4      | 37.8     | 107.2 | 1.2             | 6.3      | 72.8  | 6.4      | 31.5     | 120.7 |
| 1993–1997 | 3.0             | 14.2     | 72.5  | 6.6      | 36.2     | 113.3 | 1.2             | 6.2      | 74.8  | 4.4      | 19.8     | 101.6 |
| 1998–2002 | 6.0             | 23.9     | 88.4  | 9.8      | 47.6     | 104.6 | 2.6             | 10.5     | 90.3  | 6.4      | 25.1     | 119.3 |
| 2003–2007 | 5.4             | 23.4     | 75.3  | 7.2      | 36.6     | 85.3  | 2.4             | 10.8     | 82.9  | 4.4      | 18.3     | 98.2  |
| 2008–2012 | 5.4             | 27.4     | 84.2  | 8.2      | 38.3     | 96.9  | 2.2             | 12.0     | 83.7  | 3.6      | 15.8     | 88.9  |
|           | 35–44           |          |       | >74 y/o  |          |       | 35–44           |          |       | >74 y/o  |          |       |
| 1983–1987 | 11.4            | 36.1     | 113.3 | 7.8      | 102.5    | 130.9 | 3.2             | 10.9     | 92.0  | 6.4      | 60.0     | 103.9 |
| 1988–1992 | 7.2             | 23.6     | 99.6  | 7.4      | 79.9     | 123.9 | 3.0             | 9.7      | 100.3 | 7.2      | 48.4     | 101.1 |
| 1993–1997 | 7.2             | 26.0     | 106.2 | 4.6      | 46.8     | 89.8  | 1.2             | 5.9      | 69.8  | 7.6      | 40.5     | 117.8 |
| 1998–2002 | 8.8             | 34.7     | 98.6  | 6.8      | 55.3     | 105.0 | 1.2             | 6.8      | 66.2  | 7.4      | 32.6     | 104.9 |
| 2003–2007 | 9.8             | 38.9     | 97.1  | 9.6      | 58.2     | 129.3 | 2.4             | 10.6     | 84.2  | 8.2      | 29.0     | 129.2 |
| 2008–2012 | 10.4            | 38.6     | 103.6 | 6.2      | 34.5     | 83.1  | 3.4             | 13.1     | 96.3  | 5.0      | 16.3     | 84.8  |



Secondary Medical Zone ID: 144

|           | Male            |                  |       |                 |                  |       | Female          |                  |       |                 |                  |       |
|-----------|-----------------|------------------|-------|-----------------|------------------|-------|-----------------|------------------|-------|-----------------|------------------|-------|
|           | Suicide         |                  |       | Suicide         |                  |       | Suicide         |                  |       | Suicide         |                  |       |
|           | Num<br>per year | Rate<br>/100,000 | × 100 | Num<br>per year | Rate<br>/100,000 | × 100 | Num<br>per year | Rate<br>/100,000 | × 100 | Num<br>per year | Rate<br>/100,000 | × 100 |
|           |                 |                  |       |                 |                  |       |                 |                  |       |                 |                  |       |
|           | Total (>10 y/o) |                  |       | 45–54           |                  |       | Total (>10 y/o) |                  |       | 45–54           |                  |       |
| 1983–1987 | 10.0            | 32.1             | 99.3  | 3.0             | 55.9             | 110.6 | 5.8             | 15.2             | 99.9  | 1.2             | 18.7             | 108.7 |
| 1988–1992 | 8.8             | 24.9             | 107.5 | 1.2             | 31.3             | 91.1  | 2.8             | 11.1             | 72.7  | 0.6             | 14.2             | 97.2  |
| 1993–1997 | 10.6            | 26.6             | 119.2 | 1.2             | 32.2             | 88.1  | 4.8             | 10.8             | 102.5 | 0.8             | 13.6             | 105.5 |
| 1998–2002 | 12.6            | 36.6             | 105.4 | 3.2             | 58.0             | 103.7 | 4.2             | 12.0             | 90.4  | 0.4             | 13.6             | 90.3  |
| 2003–2007 | 12.8            | 37.0             | 109.4 | 3.2             | 63.1             | 112.9 | 4.2             | 12.2             | 95.3  | 0.6             | 13.6             | 99.2  |
| 2008–2012 | 11.6            | 34.7             | 109.1 | 1.4             | 45.0             | 92.7  | 3.2             | 12.4             | 90.2  | 0.6             | 15.0             | 100.5 |
|           | 15–24           |                  |       | 55–64           |                  |       | 15–24           |                  |       | 55–64           |                  |       |
| 1983–1987 | 0.2             | 11.7             | 83.6  | 2.6             | 48.9             | 115.2 | 0.4             | 7.4              | 107.9 | 0.4             | 15.9             | 80.3  |
| 1988–1992 | 0.2             | 9.2              | 93.2  | 2.8             | 45.0             | 126.8 | 0.0             | 4.5              | 84.9  | 0.2             | 13.8             | 77.2  |
| 1993–1997 | 1.2             | 14.6             | 129.3 | 2.6             | 46.9             | 116.5 | 0.2             | 5.2              | 100.4 | 0.6             | 14.7             | 92.7  |
| 1998–2002 | 0.8             | 17.2             | 109.0 | 2.8             | 64.6             | 101.8 | 0.2             | 6.9              | 98.3  | 0.8             | 18.5             | 98.2  |
| 2003–2007 | 0.2             | 15.7             | 90.0  | 2.4             | 54.3             | 94.1  | 0.0             | 7.6              | 84.0  | 0.6             | 16.0             | 95.3  |
| 2008–2012 | 0.6             | 21.7             | 102.3 | 2.4             | 47.7             | 98.2  | 0.0             | 8.3              | 85.5  | 0.4             | 13.6             | 91.4  |
|           | 25–34           |                  |       | 65–74           |                  |       | 25–34           |                  |       | 65–74           |                  |       |
| 1983–1987 | 1.4             | 26.9             | 105.3 | 0.4             | 33.3             | 76.1  | 0.4             | 10.2             | 95.1  | 1.8             | 38.9             | 124.3 |
| 1988–1992 | 0.4             | 16.3             | 85.2  | 2.6             | 53.9             | 153.0 | 0.2             | 8.0              | 92.2  | 0.0             | 14.6             | 56.0  |
| 1993–1997 | 1.0             | 22.1             | 113.3 | 1.8             | 38.2             | 119.7 | 0.6             | 9.6              | 115.5 | 1.0             | 19.9             | 102.1 |
| 1998–2002 | 1.0             | 27.8             | 102.8 | 2.2             | 48.0             | 105.5 | 0.2             | 10.8             | 93.2  | 1.2             | 22.0             | 104.5 |
| 2003–2007 | 1.4             | 34.1             | 109.9 | 1.4             | 40.0             | 93.1  | 0.4             | 13.0             | 100.0 | 1.2             | 20.6             | 110.7 |
| 2008–2012 | 0.6             | 30.3             | 93.0  | 2.4             | 47.6             | 120.5 | 0.2             | 13.4             | 93.3  | 0.0             | 13.9             | 78.4  |
|           | 35–44           |                  |       | >74 y/o         |                  |       | 35–44           |                  |       | >74 y/o         |                  |       |
| 1983–1987 | 0.8             | 25.4             | 79.6  | 1.6             | 89.1             | 113.8 | 0.6             | 11.9             | 100.4 | 1.0             | 48.7             | 84.4  |
| 1988–1992 | 0.2             | 16.0             | 67.6  | 1.4             | 69.4             | 107.6 | 0.4             | 9.3              | 96.4  | 1.4             | 46.4             | 96.9  |
| 1993–1997 | 1.0             | 23.2             | 94.8  | 1.6             | 62.5             | 120.1 | 0.2             | 7.6              | 89.5  | 1.4             | 35.8             | 104.1 |
| 1998–2002 | 1.4             | 35.7             | 101.2 | 1.2             | 49.7             | 94.4  | 0.0             | 8.4              | 80.8  | 1.4             | 30.1             | 96.8  |
| 2003–2007 | 1.0             | 36.5             | 91.2  | 3.2             | 68.5             | 152.2 | 0.2             | 11.5             | 91.2  | 1.2             | 21.3             | 94.9  |
| 2008–2012 | 1.2             | 37.4             | 100.6 | 3.0             | 57.2             | 137.9 | 0.6             | 14.3             | 105.4 | 1.4             | 20.3             | 105.4 |

Secondary Medical Zone ID: 145

|           | Male            |          |       |          |          |       | Female          |          |       |          |          |       |
|-----------|-----------------|----------|-------|----------|----------|-------|-----------------|----------|-------|----------|----------|-------|
|           | Suicide         |          |       | Suicide  |          |       | Suicide         |          |       | Suicide  |          |       |
|           | Num             | Rate     | × 100 | Num      | Rate     | × 100 | Num             | Rate     | × 100 | Num      | Rate     | × 100 |
|           | per year        | /100,000 |       | per year | /100,000 |       | per year        | /100,000 |       | per year | /100,000 |       |
|           | Total (>10 y/o) |          |       | 45–54    |          |       | Total (>10 y/o) |          |       | 45–54    |          |       |
| 1983–1987 | 22.0            | 30.8     | 89.5  | 5.6      | 48.7     | 96.3  | 12.6            | 14.3     | 91.9  | 1.6      | 15.3     | 88.8  |
| 1988–1992 | 20.8            | 24.6     | 101.4 | 4.6      | 36.7     | 106.9 | 12.2            | 12.1     | 94.0  | 1.0      | 12.1     | 83.0  |
| 1993–1997 | 20.8            | 24.6     | 96.3  | 5.8      | 39.8     | 108.8 | 13.4            | 11.3     | 110.6 | 1.6      | 12.5     | 96.5  |
| 1998–2002 | 30.2            | 34.2     | 94.4  | 7.4      | 53.5     | 95.6  | 12.6            | 11.9     | 93.6  | 1.4      | 13.0     | 86.2  |
| 2003–2007 | 38.2            | 38.9     | 115.0 | 10.0     | 74.7     | 133.7 | 13.8            | 12.6     | 103.7 | 0.8      | 10.8     | 78.6  |
| 2008–2012 | 30.6            | 34.9     | 101.7 | 3.8      | 40.2     | 82.7  | 11.6            | 12.0     | 94.3  | 1.6      | 14.6     | 97.8  |
|           | 15–24           |          |       | 55–64    |          |       | 15–24           |          |       | 55–64    |          |       |
| 1983–1987 | 2.8             | 19.6     | 140.9 | 2.6      | 32.0     | 75.3  | 0.4             | 5.6      | 81.7  | 1.6      | 16.5     | 83.7  |
| 1988–1992 | 1.0             | 9.3      | 93.7  | 4.0      | 34.9     | 98.2  | 1.2             | 6.9      | 131.0 | 1.4      | 14.7     | 82.3  |
| 1993–1997 | 1.4             | 11.5     | 101.3 | 3.6      | 35.2     | 87.3  | 0.4             | 4.6      | 87.4  | 2.6      | 18.7     | 117.4 |
| 1998–2002 | 1.0             | 13.1     | 83.2  | 7.4      | 63.6     | 100.1 | 0.6             | 6.6      | 93.6  | 3.0      | 21.3     | 113.2 |
| 2003–2007 | 1.6             | 17.3     | 98.9  | 8.4      | 61.7     | 106.8 | 0.8             | 8.8      | 97.8  | 2.0      | 16.0     | 95.6  |
| 2008–2012 | 2.8             | 25.8     | 121.5 | 5.6      | 43.7     | 89.9  | 0.8             | 9.6      | 99.4  | 2.2      | 15.2     | 101.9 |
|           | 25–34           |          |       | 65–74    |          |       | 25–34           |          |       | 65–74    |          |       |
| 1983–1987 | 2.0             | 20.3     | 79.4  | 3.6      | 51.8     | 118.4 | 0.6             | 8.2      | 75.9  | 3.4      | 36.5     | 116.8 |
| 1988–1992 | 1.8             | 17.4     | 91.0  | 3.8      | 45.9     | 130.4 | 1.2             | 9.4      | 108.6 | 2.6      | 26.4     | 101.1 |
| 1993–1997 | 2.2             | 19.6     | 100.5 | 1.0      | 18.9     | 59.4  | 0.6             | 7.3      | 87.4  | 2.4      | 20.7     | 106.4 |
| 1998–2002 | 2.8             | 24.7     | 91.5  | 3.4      | 38.3     | 84.2  | 1.0             | 10.5     | 90.3  | 2.6      | 21.6     | 102.7 |
| 2003–2007 | 3.2             | 27.9     | 90.0  | 5.0      | 47.3     | 110.2 | 2.0             | 14.7     | 112.7 | 2.4      | 19.7     | 105.6 |
| 2008–2012 | 3.8             | 34.2     | 105.0 | 4.8      | 43.5     | 110.1 | 0.6             | 11.2     | 78.4  | 1.8      | 17.0     | 95.3  |
|           | 35–44           |          |       | >74 y/o  |          |       | 35–44           |          |       | >74 y/o  |          |       |
| 1983–1987 | 2.4             | 22.2     | 69.7  | 3.0      | 80.4     | 102.6 | 2.2             | 13.6     | 115.3 | 2.6      | 49.5     | 85.9  |
| 1988–1992 | 2.0             | 17.6     | 74.1  | 3.6      | 74.1     | 114.9 | 0.4             | 7.0      | 72.8  | 4.4      | 55.6     | 116.2 |
| 1993–1997 | 3.0             | 24.1     | 98.1  | 3.6      | 63.4     | 121.8 | 1.6             | 10.3     | 121.3 | 4.2      | 42.3     | 122.9 |
| 1998–2002 | 3.6             | 32.8     | 93.0  | 4.6      | 66.3     | 125.8 | 0.2             | 6.9      | 66.4  | 3.8      | 32.2     | 103.6 |
| 2003–2007 | 3.8             | 35.1     | 87.5  | 6.2      | 66.4     | 147.4 | 1.6             | 13.2     | 104.3 | 4.2      | 28.3     | 126.2 |
| 2008–2012 | 5.8             | 42.3     | 113.6 | 4.0      | 41.7     | 100.6 | 0.8             | 11.1     | 81.7  | 3.8      | 22.5     | 117.0 |

Secondary Medical Zone ID: 146

|           | Male            |          |       |          |          |       | Female          |          |       |          |          |       |
|-----------|-----------------|----------|-------|----------|----------|-------|-----------------|----------|-------|----------|----------|-------|
|           | Suicide         |          |       | Suicide  |          |       | Suicide         |          |       | Suicide  |          |       |
|           | Num             | Rate     | × 100 | Num      | Rate     | × 100 | Num             | Rate     | × 100 | Num      | Rate     | × 100 |
|           | per year        | /100,000 |       | per year | /100,000 |       | per year        | /100,000 |       | per year | /100,000 |       |
|           | Total (>10 y/o) |          |       | 45–54    |          |       | Total (>10 y/o) |          |       | 45–54    |          |       |
| 1983–1987 | 18.2            | 30.2     | 88.2  | 3.6      | 41.1     | 81.2  | 7.0             | 12.7     | 71.3  | 0.6      | 12.5     | 72.5  |
| 1988–1992 | 14.0            | 22.3     | 84.3  | 2.6      | 28.9     | 84.2  | 10.0            | 12.4     | 95.5  | 1.0      | 13.1     | 89.9  |
| 1993–1997 | 15.8            | 23.9     | 90.7  | 3.2      | 32.2     | 88.0  | 9.0             | 10.5     | 97.6  | 1.6      | 13.7     | 106.2 |
| 1998–2002 | 25.4            | 34.7     | 97.8  | 6.4      | 55.2     | 98.7  | 7.8             | 11.1     | 81.1  | 1.2      | 13.7     | 91.2  |
| 2003–2007 | 23.0            | 34.9     | 89.8  | 6.2      | 57.6     | 103.0 | 9.8             | 12.3     | 97.9  | 1.2      | 13.3     | 97.0  |
| 2008–2012 | 24.0            | 34.2     | 100.4 | 4.4      | 46.4     | 95.6  | 7.0             | 12.2     | 84.4  | 0.4      | 11.3     | 75.8  |
|           | 15–24           |          |       | 55–64    |          |       | 15–24           |          |       | 55–64    |          |       |
| 1983–1987 | 1.0             | 12.8     | 91.8  | 3.6      | 41.3     | 97.1  | 0.2             | 5.7      | 83.3  | 1.0      | 15.1     | 76.7  |
| 1988–1992 | 0.2             | 7.6      | 77.2  | 3.4      | 34.4     | 96.8  | 1.2             | 7.8      | 148.1 | 2.2      | 19.2     | 107.5 |
| 1993–1997 | 0.4             | 9.3      | 81.8  | 3.6      | 39.5     | 98.0  | 0.2             | 4.4      | 85.1  | 1.6      | 15.9     | 100.1 |
| 1998–2002 | 1.0             | 14.8     | 93.7  | 9.2      | 86.7     | 136.5 | 0.0             | 5.2      | 74.7  | 2.0      | 19.5     | 103.4 |
| 2003–2007 | 0.8             | 15.7     | 90.1  | 6.0      | 57.7     | 99.9  | 0.2             | 7.2      | 79.9  | 1.4      | 15.6     | 93.1  |
| 2008–2012 | 1.8             | 23.6     | 111.3 | 4.8      | 45.5     | 93.7  | 1.0             | 12.0     | 124.2 | 0.8      | 12.5     | 83.6  |
|           | 25–34           |          |       | 65–74    |          |       | 25–34           |          |       | 65–74    |          |       |
| 1983–1987 | 2.2             | 22.4     | 87.7  | 2.6      | 47.8     | 109.1 | 0.8             | 9.7      | 90.4  | 1.6      | 26.4     | 84.5  |
| 1988–1992 | 1.8             | 18.0     | 94.2  | 1.0      | 25.6     | 72.6  | 0.4             | 7.2      | 83.4  | 1.6      | 22.1     | 84.6  |
| 1993–1997 | 2.4             | 22.2     | 113.9 | 2.0      | 28.8     | 90.3  | 0.4             | 7.2      | 86.6  | 2.0      | 20.5     | 105.3 |
| 1998–2002 | 2.2             | 25.3     | 93.6  | 3.4      | 42.5     | 93.5  | 0.4             | 9.4      | 81.4  | 1.6      | 18.5     | 88.2  |
| 2003–2007 | 2.2             | 27.4     | 88.5  | 2.0      | 32.8     | 76.4  | 1.2             | 13.4     | 103.1 | 2.0      | 19.7     | 105.8 |
| 2008–2012 | 2.6             | 32.4     | 99.6  | 3.8      | 44.1     | 111.7 | 0.6             | 12.6     | 87.7  | 1.2      | 16.1     | 90.7  |
|           | 35–44           |          |       | >74 y/o  |          |       | 35–44           |          |       | >74 y/o  |          |       |
| 1983–1987 | 3.0             | 28.1     | 88.2  | 2.2      | 76.2     | 97.4  | 0.8             | 10.2     | 86.3  | 2.0      | 46.6     | 80.7  |
| 1988–1992 | 2.8             | 22.9     | 96.6  | 2.2      | 63.1     | 97.8  | 1.4             | 10.7     | 111.1 | 2.2      | 39.2     | 81.9  |
| 1993–1997 | 2.6             | 24.0     | 97.8  | 1.6      | 44.2     | 84.8  | 0.8             | 8.4      | 98.5  | 2.4      | 33.1     | 96.2  |
| 1998–2002 | 1.0             | 19.9     | 56.6  | 2.2      | 47.8     | 90.6  | 0.4             | 8.3      | 80.1  | 2.2      | 25.7     | 82.7  |
| 2003–2007 | 4.0             | 41.9     | 104.6 | 1.8      | 34.0     | 75.5  | 1.0             | 12.3     | 97.5  | 2.8      | 24.2     | 107.8 |
| 2008–2012 | 3.0             | 35.0     | 94.1  | 3.6      | 45.0     | 108.6 | 1.2             | 13.6     | 100.4 | 1.8      | 15.8     | 82.2  |

Secondary Medical Zone ID: 147

|                 | Male            |                  |       |                 |                  |       | Female          |                  |       |                 |                  |       |
|-----------------|-----------------|------------------|-------|-----------------|------------------|-------|-----------------|------------------|-------|-----------------|------------------|-------|
|                 | Suicide         |                  |       | Suicide         |                  |       | Suicide         |                  |       | Suicide         |                  |       |
|                 | Num<br>per year | Rate<br>/100,000 | × 100 | Num<br>per year | Rate<br>/100,000 | × 100 | Num<br>per year | Rate<br>/100,000 | × 100 | Num<br>per year | Rate<br>/100,000 | × 100 |
|                 |                 |                  |       |                 |                  |       |                 |                  |       |                 |                  |       |
| Total (>10 y/o) | 45–54           | Total (>10 y/o)  | 45–54 |                 |                  |       |                 |                  |       |                 |                  |       |
| 1983–1987       | 56.2            | 32.7             | 99.7  | 14.2            | 52.5             | 103.9 | 23.4            | 12.9             | 79.6  | 3.4             | 14.1             | 81.7  |
| 1988–1992       | 48.8            | 25.2             | 102.7 | 11.8            | 38.9             | 113.2 | 21.2            | 10.7             | 75.9  | 6.0             | 18.2             | 124.4 |
| 1993–1997       | 53.6            | 25.4             | 101.9 | 16.8            | 47.0             | 128.4 | 24.6            | 10.3             | 93.5  | 4.8             | 14.0             | 108.5 |
| 1998–2002       | 78.6            | 35.5             | 99.7  | 21.4            | 61.7             | 110.3 | 22.0            | 10.2             | 73.4  | 3.8             | 12.8             | 84.9  |
| 2003–2007       | 90.0            | 40.0             | 110.3 | 21.8            | 69.1             | 123.5 | 25.6            | 11.6             | 85.4  | 2.6             | 10.6             | 77.2  |
| 2008–2012       | 78.4            | 36.0             | 103.0 | 15.4            | 51.5             | 106.0 | 29.6            | 13.0             | 96.7  | 3.4             | 13.1             | 87.6  |
|                 | 15–24           |                  |       | 55–64           |                  |       | 15–24           |                  |       | 55–64           |                  |       |
| 1983–1987       | 5.4             | 17.1             | 122.5 | 8.8             | 41.1             | 96.7  | 0.8             | 4.7              | 68.4  | 3.2             | 15.1             | 76.6  |
| 1988–1992       | 2.6             | 8.5              | 85.9  | 8.6             | 34.8             | 98.0  | 1.6             | 5.3              | 100.8 | 2.4             | 12.0             | 67.3  |
| 1993–1997       | 4.2             | 11.9             | 105.1 | 10.0            | 38.9             | 96.5  | 1.4             | 4.9              | 94.0  | 2.8             | 12.0             | 75.3  |
| 1998–2002       | 4.0             | 14.1             | 89.3  | 20.4            | 71.0             | 111.7 | 1.6             | 6.5              | 92.3  | 3.2             | 13.9             | 73.6  |
| 2003–2007       | 4.6             | 17.4             | 99.8  | 21.4            | 65.3             | 113.2 | 1.8             | 8.2              | 91.0  | 5.2             | 16.2             | 96.8  |
| 2008–2012       | 4.6             | 20.1             | 95.0  | 17.2            | 51.4             | 105.8 | 2.8             | 11.8             | 122.2 | 5.4             | 15.6             | 104.4 |
|                 | 25–34           |                  |       | 65–74           |                  |       | 25–34           |                  |       | 65–74           |                  |       |
| 1983–1987       | 8.6             | 29.5             | 115.4 | 4.8             | 38.0             | 86.7  | 3.2             | 11.2             | 104.1 | 3.8             | 23.5             | 75.1  |
| 1988–1992       | 5.6             | 19.5             | 101.9 | 3.8             | 27.3             | 77.5  | 1.8             | 7.4              | 85.1  | 3.2             | 17.6             | 67.3  |
| 1993–1997       | 6.4             | 20.1             | 102.9 | 4.4             | 25.0             | 78.5  | 2.4             | 8.2              | 98.9  | 4.2             | 18.2             | 93.6  |
| 1998–2002       | 7.0             | 22.4             | 83.0  | 8.8             | 41.5             | 91.2  | 2.8             | 10.1             | 87.0  | 4.2             | 17.7             | 84.3  |
| 2003–2007       | 12.0            | 35.9             | 115.8 | 8.8             | 38.8             | 90.5  | 4.2             | 13.8             | 105.9 | 3.0             | 13.6             | 72.9  |
| 2008–2012       | 9.8             | 35.0             | 107.5 | 10.8            | 41.7             | 105.6 | 3.4             | 13.8             | 96.3  | 4.0             | 15.5             | 87.2  |
|                 | 35–44           |                  |       | >74 y/o         |                  |       | 35–44           |                  |       | >74 y/o         |                  |       |
| 1983–1987       | 11.4            | 33.8             | 106.1 | 3.0             | 48.8             | 62.3  | 4.4             | 12.8             | 108.4 | 4.6             | 42.7             | 73.9  |
| 1988–1992       | 9.8             | 27.7             | 117.0 | 6.6             | 69.4             | 107.6 | 2.4             | 8.2              | 84.8  | 3.8             | 27.1             | 56.6  |
| 1993–1997       | 6.2             | 20.6             | 84.1  | 5.6             | 50.6             | 97.1  | 3.0             | 9.4              | 110.6 | 6.0             | 31.0             | 90.1  |
| 1998–2002       | 9.6             | 32.0             | 91.0  | 7.2             | 52.8             | 100.2 | 1.6             | 7.3              | 70.5  | 4.8             | 21.1             | 67.8  |
| 2003–2007       | 14.6            | 44.6             | 111.2 | 6.2             | 37.2             | 82.6  | 4.4             | 13.9             | 110.1 | 4.4             | 15.8             | 70.3  |
| 2008–2012       | 15.8            | 43.9             | 118.0 | 4.8             | 26.6             | 64.1  | 5.2             | 15.3             | 112.9 | 5.4             | 16.3             | 84.7  |

Secondary Medical Zone ID: 148

|                 | Male            |                  |       |                 |                  |       | Female          |                  |       |                 |                  |       |
|-----------------|-----------------|------------------|-------|-----------------|------------------|-------|-----------------|------------------|-------|-----------------|------------------|-------|
|                 | Suicide         |                  |       | Suicide         |                  |       | Suicide         |                  |       | Suicide         |                  |       |
|                 | Num<br>per year | Rate<br>/100,000 | × 100 | Num<br>per year | Rate<br>/100,000 | × 100 | Num<br>per year | Rate<br>/100,000 | × 100 | Num<br>per year | Rate<br>/100,000 | × 100 |
|                 |                 |                  |       |                 |                  |       |                 |                  |       |                 |                  |       |
| Total (>10 y/o) | 45–54           | Total (>10 y/o)  | 45–54 |                 |                  |       |                 |                  |       |                 |                  |       |
| 1983–1987       | 22.0            | 35.3             | 114.8 | 5.4             | 58.7             | 116.1 | 13.6            | 16.9             | 117.6 | 0.8             | 14.2             | 82.4  |
| 1988–1992       | 18.4            | 26.8             | 114.4 | 3.6             | 37.4             | 108.9 | 12.4            | 13.9             | 114.9 | 2.8             | 19.8             | 135.2 |
| 1993–1997       | 18.0            | 26.0             | 104.9 | 4.2             | 38.7             | 105.9 | 11.0            | 12.0             | 114.2 | 2.2             | 15.9             | 123.4 |
| 1998–2002       | 25.2            | 35.9             | 100.5 | 7.2             | 63.2             | 113.0 | 13.2            | 13.6             | 115.1 | 2.2             | 17.2             | 114.1 |
| 2003–2007       | 26.0            | 37.9             | 102.9 | 7.6             | 72.2             | 129.1 | 9.8             | 12.8             | 97.9  | 1.4             | 14.1             | 102.7 |
| 2008–2012       | 22.4            | 34.0             | 98.5  | 3.0             | 41.0             | 84.3  | 10.2            | 13.0             | 102.5 | 2.0             | 17.7             | 118.9 |
|                 | 15–24           |                  |       | 55–64           |                  |       | 15–24           |                  |       | 55–64           |                  |       |
| 1983–1987       | 1.0             | 13.4             | 96.4  | 3.0             | 40.4             | 95.1  | 0.8             | 7.6              | 111.0 | 1.6             | 19.1             | 97.0  |
| 1988–1992       | 0.8             | 9.8              | 98.8  | 2.4             | 31.0             | 87.2  | 1.4             | 8.4              | 158.4 | 1.6             | 17.8             | 99.6  |
| 1993–1997       | 0.6             | 10.0             | 88.4  | 3.8             | 41.8             | 103.8 | 1.2             | 7.7              | 147.1 | 2.2             | 19.4             | 122.0 |
| 1998–2002       | 2.0             | 19.3             | 121.9 | 4.2             | 52.6             | 82.8  | 0.6             | 7.2              | 102.4 | 2.2             | 20.4             | 108.2 |
| 2003–2007       | 1.6             | 19.4             | 111.2 | 5.8             | 57.3             | 99.3  | 1.2             | 11.6             | 129.2 | 0.8             | 13.6             | 81.1  |
| 2008–2012       | 0.8             | 18.6             | 87.8  | 4.6             | 46.0             | 94.8  | 0.6             | 9.7              | 99.9  | 1.2             | 13.7             | 91.8  |
|                 | 25–34           |                  |       | 65–74           |                  |       | 25–34           |                  |       | 65–74           |                  |       |
| 1983–1987       | 3.2             | 31.9             | 125.0 | 2.2             | 43.2             | 98.6  | 3.0             | 19.8             | 184.1 | 2.6             | 34.8             | 111.4 |
| 1988–1992       | 1.6             | 19.7             | 103.0 | 2.0             | 34.4             | 97.7  | 0.6             | 8.3              | 95.4  | 2.2             | 27.2             | 104.4 |
| 1993–1997       | 2.0             | 21.3             | 109.2 | 2.2             | 31.5             | 98.8  | 1.4             | 10.7             | 128.4 | 2.0             | 21.6             | 111.0 |
| 1998–2002       | 2.8             | 28.3             | 104.8 | 2.2             | 36.2             | 79.6  | 0.6             | 9.9              | 85.6  | 2.6             | 25.1             | 119.3 |
| 2003–2007       | 3.0             | 32.9             | 106.1 | 3.2             | 41.5             | 96.6  | 2.0             | 16.4             | 126.0 | 2.2             | 21.2             | 113.7 |
| 2008–2012       | 2.8             | 35.5             | 108.9 | 4.2             | 45.1             | 114.3 | 0.6             | 12.7             | 88.3  | 2.2             | 20.1             | 113.0 |
|                 | 35–44           |                  |       | >74 y/o         |                  |       | 35–44           |                  |       | >74 y/o         |                  |       |
| 1983–1987       | 5.2             | 44.1             | 138.5 | 2.0             | 69.0             | 88.1  | 1.6             | 13.4             | 113.6 | 3.2             | 62.9             | 109.1 |
| 1988–1992       | 4.6             | 35.4             | 149.4 | 3.2             | 75.2             | 116.6 | 0.6             | 8.6              | 88.6  | 3.2             | 49.0             | 102.4 |
| 1993–1997       | 3.0             | 28.4             | 115.9 | 2.2             | 49.8             | 95.6  | 0.6             | 7.8              | 91.9  | 1.4             | 21.7             | 63.1  |
| 1998–2002       | 3.0             | 34.2             | 97.0  | 3.8             | 63.9             | 121.1 | 1.6             | 13.0             | 125.7 | 3.4             | 34.6             | 111.4 |
| 2003–2007       | 3.0             | 35.5             | 88.6  | 1.8             | 33.8             | 75.1  | 0.4             | 9.9              | 78.6  | 1.6             | 16.6             | 74.1  |
| 2008–2012       | 4.2             | 40.5             | 108.7 | 2.8             | 39.0             | 94.1  | 1.2             | 13.3             | 98.4  | 2.4             | 19.5             | 101.5 |

Secondary Medical Zone ID: 149

|                 | Male            |                  |       |                 |                  |       | Female          |                  |       |                 |                  |       |
|-----------------|-----------------|------------------|-------|-----------------|------------------|-------|-----------------|------------------|-------|-----------------|------------------|-------|
|                 | Suicide         |                  |       | Suicide         |                  |       | Suicide         |                  |       | Suicide         |                  |       |
|                 | Num<br>per year | Rate<br>/100,000 | × 100 | Num<br>per year | Rate<br>/100,000 | × 100 | Num<br>per year | Rate<br>/100,000 | × 100 | Num<br>per year | Rate<br>/100,000 | × 100 |
|                 |                 |                  |       |                 |                  |       |                 |                  |       |                 |                  |       |
| Total (>10 y/o) | 45–54           | Total (>10 y/o)  | 45–54 |                 |                  |       |                 |                  |       |                 |                  |       |
| 1983–1987       | 16.0            | 37.7             | 130.8 | 3.2             | 57.4             | 113.6 | 7.4             | 15.8             | 105.2 | 1.8             | 21.9             | 127.4 |
| 1988–1992       | 10.4            | 26.3             | 113.6 | 1.6             | 34.5             | 100.4 | 6.2             | 12.8             | 101.6 | 1.2             | 16.8             | 114.9 |
| 1993–1997       | 11.0            | 27.0             | 117.8 | 2.6             | 42.7             | 116.8 | 4.8             | 10.6             | 97.5  | 0.2             | 11.3             | 87.3  |
| 1998–2002       | 14.8            | 37.8             | 116.1 | 3.6             | 64.0             | 114.3 | 3.2             | 11.3             | 79.0  | 0.4             | 14.0             | 92.7  |
| 2003–2007       | 11.0            | 36.4             | 97.1  | 2.0             | 50.9             | 91.0  | 6.6             | 13.7             | 117.3 | 0.8             | 14.8             | 108.3 |
| 2008–2012       | 13.0            | 36.5             | 118.0 | 1.8             | 48.5             | 99.8  | 4.0             | 12.6             | 97.8  | 0.4             | 14.3             | 95.8  |
|                 | 15–24           |                  |       | 55–64           |                  |       | 15–24           |                  |       | 55–64           |                  |       |
| 1983–1987       | 1.2             | 17.6             | 126.2 | 2.0             | 40.5             | 95.2  | 0.0             | 5.6              | 82.2  | 1.0             | 18.4             | 93.4  |
| 1988–1992       | 0.2             | 9.0              | 90.6  | 1.6             | 33.2             | 93.5  | 0.0             | 4.4              | 84.0  | 1.6             | 20.9             | 117.0 |
| 1993–1997       | 0.6             | 11.9             | 105.6 | 2.2             | 43.1             | 107.0 | 0.2             | 5.3              | 101.0 | 0.6             | 14.8             | 93.3  |
| 1998–2002       | 0.6             | 16.1             | 101.9 | 3.6             | 72.4             | 113.9 | 0.0             | 6.2              | 87.5  | 0.2             | 15.8             | 83.8  |
| 2003–2007       | 0.6             | 17.9             | 102.8 | 2.8             | 59.9             | 103.7 | 0.2             | 8.7              | 97.2  | 1.4             | 19.5             | 116.2 |
| 2008–2012       | 1.0             | 24.3             | 114.7 | 1.8             | 45.3             | 93.3  | 0.0             | 8.3              | 85.5  | 1.2             | 17.1             | 114.7 |
|                 | 25–34           |                  |       | 65–74           |                  |       | 25–34           |                  |       | 65–74           |                  |       |
| 1983–1987       | 3.0             | 39.2             | 153.3 | 1.6             | 45.6             | 104.3 | 1.2             | 14.7             | 136.2 | 1.6             | 32.9             | 105.2 |
| 1988–1992       | 1.8             | 27.4             | 143.2 | 1.4             | 36.1             | 102.5 | 0.0             | 7.2              | 83.0  | 1.2             | 24.6             | 94.3  |
| 1993–1997       | 1.4             | 24.4             | 124.9 | 2.0             | 38.0             | 119.0 | 0.8             | 10.5             | 126.7 | 0.8             | 17.2             | 88.0  |
| 1998–2002       | 0.8             | 26.1             | 96.7  | 2.8             | 52.3             | 114.9 | 0.2             | 10.9             | 93.9  | 0.6             | 17.5             | 83.2  |
| 2003–2007       | 1.4             | 34.4             | 111.0 | 1.8             | 43.6             | 101.6 | 0.8             | 15.2             | 117.2 | 0.6             | 17.0             | 91.3  |
| 2008–2012       | 0.8             | 32.6             | 99.9  | 2.4             | 47.2             | 119.5 | 0.2             | 13.8             | 96.1  | 0.2             | 15.0             | 84.4  |
|                 | 35–44           |                  |       | >74 y/o         |                  |       | 35–44           |                  |       | >74 y/o         |                  |       |
| 1983–1987       | 2.6             | 40.0             | 125.8 | 2.4             | 97.9             | 125.0 | 0.4             | 11.1             | 94.2  | 1.4             | 47.2             | 81.9  |
| 1988–1992       | 2.0             | 29.8             | 125.7 | 1.8             | 70.2             | 108.8 | 0.4             | 9.5              | 98.5  | 1.8             | 44.8             | 93.7  |
| 1993–1997       | 1.0             | 23.7             | 96.8  | 1.2             | 48.1             | 92.4  | 0.4             | 8.8              | 103.0 | 1.8             | 35.8             | 104.0 |
| 1998–2002       | 1.2             | 33.6             | 95.4  | 2.2             | 60.3             | 114.4 | 0.0             | 8.5              | 82.5  | 1.8             | 30.5             | 98.1  |
| 2003–2007       | 1.4             | 40.1             | 100.1 | 1.0             | 34.7             | 77.0  | 1.0             | 15.3             | 121.4 | 1.8             | 24.7             | 109.9 |
| 2008–2012       | 2.2             | 44.1             | 118.5 | 3.0             | 54.4             | 131.1 | 0.6             | 14.4             | 106.1 | 1.4             | 19.2             | 100.1 |

Secondary Medical Zone ID: 150

|           | Male            |                  |       |                 |                  |       | Female          |                  |       |                 |                  |       |
|-----------|-----------------|------------------|-------|-----------------|------------------|-------|-----------------|------------------|-------|-----------------|------------------|-------|
|           | Suicide         |                  |       | Suicide         |                  |       | Suicide         |                  |       | Suicide         |                  |       |
|           | Num<br>per year | Rate<br>/100,000 | × 100 | Num<br>per year | Rate<br>/100,000 | × 100 | Num<br>per year | Rate<br>/100,000 | × 100 | Num<br>per year | Rate<br>/100,000 | × 100 |
|           |                 |                  |       |                 |                  |       |                 |                  |       |                 |                  |       |
|           | Total (>10 y/o) |                  |       | 45–54           |                  |       | Total (>10 y/o) |                  |       | 45–54           |                  |       |
| 1983–1987 | 24.2            | 31.5             | 96.3  | 4.2             | 39.1             | 77.4  | 16.6            | 16.9             | 116.8 | 3.8             | 23.5             | 136.4 |
| 1988–1992 | 26.6            | 28.3             | 123.5 | 6.0             | 43.2             | 125.7 | 18.2            | 15.2             | 134.1 | 2.6             | 17.1             | 117.1 |
| 1993–1997 | 26.8            | 27.0             | 114.1 | 6.4             | 41.5             | 113.5 | 15.8            | 12.6             | 128.7 | 1.8             | 13.2             | 102.1 |
| 1998–2002 | 35.8            | 36.7             | 104.8 | 9.8             | 62.1             | 111.0 | 15.0            | 13.0             | 107.4 | 1.8             | 14.2             | 94.5  |
| 2003–2007 | 43.4            | 42.3             | 124.0 | 9.4             | 64.4             | 115.2 | 16.2            | 13.6             | 116.5 | 2.2             | 15.0             | 109.4 |
| 2008–2012 | 39.2            | 38.9             | 120.5 | 8.8             | 61.4             | 126.3 | 17.2            | 14.1             | 122.0 | 1.6             | 14.0             | 94.2  |
|           | 15–24           |                  |       | 55–64           |                  |       | 15–24           |                  |       | 55–64           |                  |       |
| 1983–1987 | 2.2             | 15.0             | 107.5 | 5.0             | 46.4             | 109.1 | 1.2             | 7.3              | 106.3 | 2.0             | 18.7             | 94.6  |
| 1988–1992 | 1.0             | 8.7              | 87.9  | 5.4             | 42.8             | 120.5 | 0.8             | 5.3              | 100.1 | 4.2             | 25.7             | 144.0 |
| 1993–1997 | 2.0             | 12.6             | 111.2 | 5.8             | 46.0             | 114.2 | 0.6             | 4.8              | 92.2  | 3.2             | 21.0             | 131.9 |
| 1998–2002 | 1.8             | 15.1             | 95.8  | 10.2            | 78.5             | 123.5 | 1.4             | 8.5              | 120.4 | 2.6             | 19.8             | 105.0 |
| 2003–2007 | 2.2             | 17.9             | 102.6 | 9.0             | 64.7             | 112.0 | 0.8             | 7.9              | 88.1  | 3.2             | 19.8             | 118.4 |
| 2008–2012 | 3.4             | 26.0             | 122.7 | 6.8             | 47.7             | 98.3  | 1.4             | 11.0             | 113.0 | 3.2             | 18.3             | 122.4 |
|           | 25–34           |                  |       | 65–74           |                  |       | 25–34           |                  |       | 65–74           |                  |       |
| 1983–1987 | 3.4             | 25.2             | 98.4  | 3.6             | 55.4             | 126.4 | 2.2             | 13.6             | 125.9 | 2.4             | 31.1             | 99.4  |
| 1988–1992 | 4.4             | 27.6             | 144.4 | 3.0             | 40.0             | 113.5 | 2.4             | 12.8             | 147.4 | 2.8             | 29.0             | 111.2 |
| 1993–1997 | 3.0             | 20.8             | 106.5 | 4.8             | 46.3             | 145.1 | 1.4             | 9.2              | 111.0 | 3.0             | 24.7             | 126.9 |
| 1998–2002 | 3.8             | 28.0             | 103.7 | 3.2             | 37.4             | 82.2  | 1.8             | 12.6             | 109.1 | 2.2             | 19.9             | 94.8  |
| 2003–2007 | 4.8             | 37.0             | 119.4 | 5.6             | 50.5             | 117.7 | 1.6             | 13.6             | 104.9 | 2.0             | 17.9             | 95.9  |
| 2008–2012 | 4.6             | 39.3             | 120.5 | 6.4             | 51.7             | 130.8 | 1.2             | 14.0             | 98.0  | 2.6             | 19.7             | 111.0 |
|           | 35–44           |                  |       | >74 y/o         |                  |       | 35–44           |                  |       | >74 y/o         |                  |       |
| 1983–1987 | 3.8             | 28.9             | 90.7  | 1.8             | 66.9             | 85.4  | 1.6             | 12.0             | 101.4 | 3.4             | 68.3             | 118.4 |
| 1988–1992 | 4.6             | 28.1             | 118.4 | 2.2             | 60.9             | 94.4  | 2.0             | 11.6             | 119.7 | 3.4             | 53.3             | 111.4 |
| 1993–1997 | 3.8             | 25.6             | 104.4 | 1.0             | 32.6             | 62.6  | 2.0             | 11.3             | 133.2 | 3.8             | 45.2             | 131.3 |
| 1998–2002 | 4.0             | 31.3             | 88.8  | 3.0             | 52.3             | 99.2  | 0.6             | 7.9              | 76.4  | 4.6             | 42.6             | 137.2 |
| 2003–2007 | 7.6             | 53.1             | 132.5 | 4.8             | 57.3             | 127.2 | 1.8             | 13.4             | 105.7 | 4.4             | 32.1             | 142.9 |
| 2008–2012 | 5.6             | 41.4             | 111.2 | 3.6             | 40.5             | 97.6  | 2.4             | 16.1             | 118.9 | 4.8             | 28.6             | 148.7 |

Secondary Medical Zone ID: 151

|           | Male            |          |       |          |          |       | Female          |          |       |          |          |       |
|-----------|-----------------|----------|-------|----------|----------|-------|-----------------|----------|-------|----------|----------|-------|
|           | Suicide         |          |       | Suicide  |          |       | Suicide         |          |       | Suicide  |          |       |
|           | Num             | Rate     | × 100 | Num      | Rate     | × 100 | Num             | Rate     | × 100 | Num      | Rate     | × 100 |
|           | per year        | /100,000 |       | per year | /100,000 |       | per year        | /100,000 |       | per year | /100,000 |       |
|           | Total (>10 y/o) |          |       | 45–54    |          |       | Total (>10 y/o) |          |       | 45–54    |          |       |
| 1983–1987 | 25.6            | 31.3     | 91.2  | 5.8      | 47.0     | 93.0  | 14.0            | 14.2     | 89.3  | 2.0      | 16.3     | 94.7  |
| 1988–1992 | 21.6            | 23.8     | 93.5  | 4.0      | 32.0     | 93.2  | 12.6            | 11.6     | 86.7  | 1.4      | 13.2     | 90.3  |
| 1993–1997 | 22.4            | 24.2     | 91.6  | 4.2      | 31.6     | 86.4  | 14.4            | 11.5     | 106.9 | 2.0      | 13.6     | 105.0 |
| 1998–2002 | 34.6            | 35.4     | 94.7  | 7.8      | 51.3     | 91.6  | 15.2            | 12.2     | 99.0  | 2.8      | 16.9     | 112.2 |
| 2003–2007 | 36.0            | 36.6     | 96.9  | 7.8      | 54.2     | 97.0  | 12.8            | 11.7     | 91.2  | 1.8      | 13.5     | 98.4  |
| 2008–2012 | 30.2            | 33.0     | 88.8  | 5.2      | 42.2     | 86.9  | 17.2            | 14.1     | 112.6 | 2.8      | 18.0     | 121.0 |
|           | 15–24           |          |       | 55–64    |          |       | 15–24           |          |       | 55–64    |          |       |
| 1983–1987 | 2.4             | 17.8     | 127.4 | 3.2      | 31.4     | 73.8  | 0.8             | 7.0      | 102.1 | 1.6      | 15.0     | 76.1  |
| 1988–1992 | 2.0             | 12.4     | 125.2 | 4.4      | 33.9     | 95.4  | 0.4             | 4.6      | 87.6  | 1.8      | 15.2     | 85.2  |
| 1993–1997 | 2.6             | 15.1     | 133.9 | 4.2      | 35.8     | 89.0  | 0.0             | 3.4      | 64.9  | 2.8      | 18.6     | 117.2 |
| 1998–2002 | 2.4             | 18.2     | 115.1 | 6.6      | 55.0     | 86.6  | 0.6             | 6.5      | 93.2  | 2.4      | 18.7     | 99.1  |
| 2003–2007 | 2.4             | 20.2     | 115.6 | 8.0      | 55.3     | 95.8  | 0.6             | 7.9      | 88.0  | 2.4      | 16.7     | 99.9  |
| 2008–2012 | 2.8             | 25.4     | 119.8 | 6.2      | 42.4     | 87.2  | 1.0             | 10.2     | 105.5 | 2.6      | 15.8     | 105.7 |
|           | 25–34           |          |       | 65–74    |          |       | 25–34           |          |       | 65–74    |          |       |
| 1983–1987 | 5.8             | 36.4     | 142.4 | 1.8      | 30.9     | 70.5  | 1.0             | 9.4      | 87.3  | 2.4      | 26.2     | 83.9  |
| 1988–1992 | 3.0             | 21.9     | 114.8 | 1.8      | 25.5     | 72.5  | 0.6             | 7.2      | 83.4  | 2.2      | 20.6     | 78.9  |
| 1993–1997 | 3.2             | 22.7     | 116.1 | 1.8      | 21.3     | 66.9  | 2.0             | 11.6     | 138.9 | 2.8      | 20.3     | 104.2 |
| 1998–2002 | 5.8             | 35.6     | 131.7 | 4.6      | 40.9     | 90.0  | 1.6             | 12.1     | 104.5 | 2.8      | 20.6     | 98.2  |
| 2003–2007 | 3.8             | 30.1     | 96.9  | 3.2      | 32.7     | 76.2  | 1.2             | 11.7     | 90.2  | 2.4      | 18.5     | 99.3  |
| 2008–2012 | 3.4             | 31.2     | 95.7  | 4.4      | 37.7     | 95.4  | 2.0             | 16.0     | 111.4 | 2.4      | 18.1     | 101.9 |
|           | 35–44           |          |       | >74 y/o  |          |       | 35–44           |          |       | >74 y/o  |          |       |
| 1983–1987 | 4.0             | 29.0     | 91.0  | 2.6      | 61.7     | 78.8  | 1.6             | 11.7     | 99.3  | 4.6      | 63.1     | 109.3 |
| 1988–1992 | 3.2             | 21.7     | 91.5  | 3.2      | 58.1     | 90.1  | 1.4             | 9.7      | 100.7 | 4.8      | 50.8     | 106.1 |
| 1993–1997 | 3.8             | 25.7     | 104.9 | 2.6      | 42.7     | 82.1  | 1.6             | 10.0     | 117.6 | 3.0      | 27.7     | 80.5  |
| 1998–2002 | 5.0             | 36.6     | 103.9 | 2.4      | 36.0     | 68.3  | 0.2             | 6.6      | 64.0  | 4.8      | 33.4     | 107.6 |
| 2003–2007 | 6.4             | 46.2     | 115.4 | 4.2      | 41.9     | 93.0  | 0.6             | 9.5      | 74.8  | 3.8      | 22.2     | 99.0  |
| 2008–2012 | 4.8             | 35.8     | 96.3  | 3.4      | 32.3     | 77.8  | 2.2             | 14.8     | 109.3 | 4.2      | 21.2     | 110.1 |



Secondary Medical Zone ID: 152

|                 | Male            |                  |       |                 |                  |       | Female          |                  |       |                 |                  |       |
|-----------------|-----------------|------------------|-------|-----------------|------------------|-------|-----------------|------------------|-------|-----------------|------------------|-------|
|                 | Suicide         |                  |       | Suicide         |                  |       | Suicide         |                  |       | Suicide         |                  |       |
|                 | Num<br>per year | Rate<br>/100,000 | × 100 | Num<br>per year | Rate<br>/100,000 | × 100 | Num<br>per year | Rate<br>/100,000 | × 100 | Num<br>per year | Rate<br>/100,000 | × 100 |
|                 |                 |                  |       |                 |                  |       |                 |                  |       |                 |                  |       |
| Total (>10 y/o) | 45–54           | Total (>10 y/o)  | 45–54 |                 |                  |       |                 |                  |       |                 |                  |       |
| 1983–1987       | 25.0            | 31.4             | 93.7  | 5.0             | 43.7             | 86.3  | 16.8            | 15.9             | 108.5 | 1.8             | 15.7             | 91.0  |
| 1988–1992       | 25.2            | 26.6             | 111.4 | 7.0             | 46.7             | 135.9 | 18.8            | 14.5             | 125.6 | 2.6             | 16.7             | 114.3 |
| 1993–1997       | 22.4            | 24.6             | 93.9  | 6.4             | 40.4             | 110.4 | 13.2            | 10.8             | 103.3 | 2.0             | 13.3             | 102.8 |
| 1998–2002       | 35.0            | 35.7             | 98.6  | 8.2             | 55.4             | 99.0  | 20.8            | 15.2             | 129.4 | 5.4             | 24.5             | 162.6 |
| 2003–2007       | 30.6            | 33.5             | 87.9  | 5.0             | 42.7             | 76.3  | 16.6            | 13.6             | 113.0 | 0.8             | 10.6             | 77.4  |
| 2008–2012       | 31.6            | 34.7             | 97.7  | 5.8             | 49.0             | 100.7 | 13.4            | 13.7             | 99.2  | 2.6             | 17.8             | 119.5 |
|                 | 15–24           |                  |       | 55–64           |                  |       | 15–24           |                  |       | 55–64           |                  |       |
| 1983–1987       | 2.2             | 16.1             | 115.6 | 3.0             | 31.6             | 74.3  | 1.4             | 8.5              | 125.1 | 2.4             | 18.7             | 94.8  |
| 1988–1992       | 2.4             | 13.0             | 131.6 | 3.2             | 28.8             | 81.1  | 1.0             | 6.2              | 117.4 | 4.4             | 25.0             | 140.3 |
| 1993–1997       | 1.6             | 11.5             | 101.6 | 2.8             | 29.1             | 72.4  | 0.0             | 3.3              | 63.3  | 2.6             | 17.9             | 112.9 |
| 1998–2002       | 3.8             | 22.7             | 143.9 | 7.0             | 56.8             | 89.4  | 1.8             | 10.1             | 144.4 | 3.6             | 22.5             | 119.3 |
| 2003–2007       | 1.6             | 16.6             | 95.1  | 7.4             | 53.1             | 92.0  | 0.8             | 8.7              | 96.7  | 3.4             | 19.6             | 116.9 |
| 2008–2012       | 1.8             | 20.5             | 96.5  | 5.2             | 40.7             | 83.9  | 1.0             | 10.5             | 108.6 | 2.8             | 16.6             | 111.1 |
|                 | 25–34           |                  |       | 65–74           |                  |       | 25–34           |                  |       | 65–74           |                  |       |
| 1983–1987       | 2.6             | 23.0             | 89.8  | 2.8             | 41.4             | 94.4  | 0.6             | 8.2              | 76.0  | 3.4             | 34.3             | 109.9 |
| 1988–1992       | 1.6             | 15.8             | 82.8  | 2.6             | 32.5             | 92.2  | 1.2             | 9.3              | 107.5 | 3.6             | 30.3             | 116.0 |
| 1993–1997       | 3.2             | 22.9             | 117.3 | 2.8             | 28.7             | 89.9  | 0.6             | 7.1              | 84.9  | 1.8             | 16.1             | 82.7  |
| 1998–2002       | 5.0             | 32.4             | 120.1 | 3.2             | 34.7             | 76.3  | 1.6             | 12.1             | 104.2 | 3.0             | 22.2             | 105.5 |
| 2003–2007       | 4.6             | 34.0             | 109.5 | 3.0             | 32.5             | 75.8  | 2.2             | 15.3             | 117.7 | 2.6             | 19.7             | 105.6 |
| 2008–2012       | 3.8             | 34.3             | 105.3 | 3.6             | 34.0             | 86.2  | 2.0             | 16.4             | 114.6 | 1.0             | 13.3             | 74.9  |
|                 | 35–44           |                  |       | >74 y/o         |                  |       | 35–44           |                  |       | >74 y/o         |                  |       |
| 1983–1987       | 5.8             | 36.8             | 115.5 | 3.4             | 82.7             | 105.5 | 2.2             | 13.3             | 113.0 | 5.0             | 78.0             | 135.2 |
| 1988–1992       | 4.4             | 27.6             | 116.4 | 3.8             | 73.3             | 113.6 | 1.2             | 9.1              | 94.7  | 4.8             | 58.1             | 121.5 |
| 1993–1997       | 4.0             | 27.9             | 114.0 | 1.4             | 32.1             | 61.6  | 1.0             | 8.2              | 96.2  | 5.0             | 46.8             | 136.1 |
| 1998–2002       | 3.8             | 32.1             | 91.2  | 4.0             | 53.2             | 101.0 | 1.4             | 10.8             | 104.8 | 4.0             | 31.4             | 101.0 |
| 2003–2007       | 4.4             | 36.9             | 92.0  | 4.6             | 47.7             | 106.0 | 2.6             | 16.1             | 127.6 | 4.2             | 26.1             | 116.2 |
| 2008–2012       | 7.2             | 46.3             | 124.4 | 4.2             | 39.5             | 95.2  | 1.8             | 13.8             | 102.1 | 2.2             | 14.5             | 75.3  |

Secondary Medical Zone ID: 153

|           | Male            |                  |       |                 |                  |       | Female          |                  |       |                 |                  |       |
|-----------|-----------------|------------------|-------|-----------------|------------------|-------|-----------------|------------------|-------|-----------------|------------------|-------|
|           | Suicide         |                  |       | Suicide         |                  |       | Suicide         |                  |       | Suicide         |                  |       |
|           | Num<br>per year | Rate<br>/100,000 | × 100 | Num<br>per year | Rate<br>/100,000 | × 100 | Num<br>per year | Rate<br>/100,000 | × 100 | Num<br>per year | Rate<br>/100,000 | × 100 |
|           |                 |                  |       |                 |                  |       |                 |                  |       |                 |                  |       |
|           | Total (>10 y/o) |                  |       | 45–54           |                  |       | Total (>10 y/o) |                  |       | 45–54           |                  |       |
| 1983–1987 | 31.0            | 34.4             | 109.2 | 8.8             | 60.8             | 120.2 | 15.6            | 15.2             | 99.4  | 2.2             | 16.6             | 96.1  |
| 1988–1992 | 21.2            | 23.8             | 93.8  | 5.4             | 35.7             | 104.1 | 15.8            | 13.1             | 106.7 | 2.0             | 14.1             | 96.2  |
| 1993–1997 | 21.0            | 22.8             | 87.4  | 3.4             | 27.0             | 73.9  | 12.6            | 10.8             | 98.3  | 2.8             | 15.0             | 115.8 |
| 1998–2002 | 29.0            | 32.0             | 82.1  | 6.2             | 45.9             | 82.0  | 15.6            | 12.8             | 102.7 | 2.6             | 16.1             | 106.7 |
| 2003–2007 | 36.6            | 38.0             | 99.8  | 8.4             | 64.0             | 114.4 | 12.4            | 11.9             | 91.1  | 0.8             | 10.7             | 78.2  |
| 2008–2012 | 28.8            | 33.1             | 88.9  | 5.6             | 48.1             | 99.1  | 14.6            | 13.0             | 103.9 | 0.8             | 11.7             | 78.7  |
|           | 15–24           |                  |       | 55–64           |                  |       | 15–24           |                  |       | 55–64           |                  |       |
| 1983–1987 | 2.2             | 16.2             | 116.3 | 7.0             | 55.3             | 130.0 | 0.8             | 6.6              | 97.2  | 1.6             | 15.9             | 80.5  |
| 1988–1992 | 1.8             | 11.2             | 113.1 | 3.6             | 31.1             | 87.6  | 1.2             | 6.7              | 126.4 | 2.0             | 16.3             | 91.2  |
| 1993–1997 | 2.8             | 15.3             | 134.9 | 4.2             | 35.1             | 87.1  | 1.0             | 6.2              | 118.3 | 2.0             | 15.2             | 95.5  |
| 1998–2002 | 1.2             | 13.6             | 85.9  | 6.8             | 52.3             | 82.4  | 1.0             | 7.8              | 111.7 | 3.2             | 20.1             | 106.9 |
| 2003–2007 | 2.6             | 21.1             | 120.7 | 8.2             | 54.9             | 95.1  | 0.8             | 9.1              | 101.1 | 2.8             | 17.1             | 102.1 |
| 2008–2012 | 2.8             | 26.3             | 124.0 | 5.6             | 43.0             | 88.5  | 1.4             | 12.7             | 131.4 | 1.6             | 13.2             | 88.2  |
|           | 25–34           |                  |       | 65–74           |                  |       | 25–34           |                  |       | 65–74           |                  |       |
| 1983–1987 | 3.6             | 26.4             | 103.2 | 2.2             | 38.7             | 88.4  | 2.2             | 13.4             | 125.0 | 3.6             | 37.8             | 121.0 |
| 1988–1992 | 2.6             | 19.7             | 102.8 | 2.6             | 34.3             | 97.3  | 1.0             | 8.4              | 97.4  | 2.2             | 23.2             | 88.8  |
| 1993–1997 | 3.0             | 20.6             | 105.7 | 2.8             | 29.8             | 93.3  | 1.2             | 8.8              | 105.4 | 2.0             | 17.6             | 90.5  |
| 1998–2002 | 5.4             | 31.6             | 117.0 | 3.2             | 35.3             | 77.5  | 1.6             | 11.6             | 100.4 | 2.8             | 21.4             | 101.8 |
| 2003–2007 | 4.4             | 30.1             | 97.1  | 4.4             | 39.3             | 91.6  | 1.0             | 10.7             | 81.9  | 2.0             | 16.8             | 90.2  |
| 2008–2012 | 4.0             | 33.5             | 103.0 | 3.2             | 30.5             | 77.3  | 1.4             | 14.0             | 97.4  | 2.0             | 16.1             | 90.2  |
|           | 35–44           |                  |       | >74 y/o         |                  |       | 35–44           |                  |       | >74 y/o         |                  |       |
| 1983–1987 | 5.0             | 30.5             | 95.9  | 1.8             | 55.7             | 71.1  | 2.6             | 13.6             | 114.9 | 2.6             | 43.3             | 75.1  |
| 1988–1992 | 4.0             | 25.3             | 106.6 | 1.0             | 34.7             | 53.8  | 2.4             | 12.2             | 125.9 | 5.0             | 57.9             | 120.9 |
| 1993–1997 | 2.2             | 19.5             | 79.7  | 2.6             | 48.0             | 92.3  | 1.2             | 8.8              | 104.0 | 2.4             | 26.5             | 77.0  |
| 1998–2002 | 4.0             | 32.9             | 93.5  | 2.2             | 37.9             | 71.8  | 0.6             | 8.2              | 79.1  | 3.8             | 31.7             | 102.2 |
| 2003–2007 | 7.0             | 48.6             | 121.3 | 1.6             | 25.9             | 57.5  | 2.2             | 14.8             | 117.4 | 2.8             | 19.8             | 88.5  |
| 2008–2012 | 4.2             | 32.2             | 86.4  | 3.2             | 33.6             | 81.0  | 1.4             | 12.3             | 91.0  | 6.0             | 30.7             | 159.6 |

Secondary Medical Zone ID: 154

|           | Male            |                  |       |                 |                  |       | Female          |                  |       |                 |                  |       |
|-----------|-----------------|------------------|-------|-----------------|------------------|-------|-----------------|------------------|-------|-----------------|------------------|-------|
|           | Suicide         |                  |       | Suicide         |                  |       | Suicide         |                  |       | Suicide         |                  |       |
|           | Num<br>per year | Rate<br>/100,000 | × 100 | Num<br>per year | Rate<br>/100,000 | × 100 | Num<br>per year | Rate<br>/100,000 | × 100 | Num<br>per year | Rate<br>/100,000 | × 100 |
|           |                 |                  |       |                 |                  |       |                 |                  |       |                 |                  |       |
|           | Total (>10 y/o) |                  |       | 45–54           |                  |       | Total (>10 y/o) |                  |       | 45–54           |                  |       |
| 1983–1987 | 23.2            | 30.9             | 93.3  | 4.4             | 41.9             | 82.8  | 16.0            | 16.3             | 109.6 | 3.8             | 23.8             | 138.2 |
| 1988–1992 | 22.0            | 25.5             | 105.7 | 4.0             | 33.4             | 97.3  | 13.0            | 12.5             | 98.7  | 1.4             | 13.3             | 91.3  |
| 1993–1997 | 22.0            | 25.3             | 99.7  | 7.0             | 45.8             | 125.2 | 14.6            | 12.3             | 118.7 | 2.8             | 16.2             | 125.5 |
| 1998–2002 | 33.6            | 36.4             | 103.3 | 8.6             | 61.7             | 110.3 | 14.8            | 12.8             | 106.1 | 1.8             | 14.5             | 96.4  |
| 2003–2007 | 37.4            | 39.3             | 112.6 | 6.8             | 56.1             | 100.3 | 11.6            | 11.7             | 93.4  | 1.8             | 14.3             | 104.7 |
| 2008–2012 | 38.2            | 39.2             | 119.8 | 6.2             | 52.2             | 107.4 | 11.0            | 12.3             | 92.1  | 1.8             | 15.6             | 104.4 |
|           | 15–24           |                  |       | 55–64           |                  |       | 15–24           |                  |       | 55–64           |                  |       |
| 1983–1987 | 1.0             | 11.8             | 84.7  | 4.2             | 40.1             | 94.4  | 0.8             | 7.2              | 105.1 | 2.2             | 18.8             | 95.1  |
| 1988–1992 | 1.6             | 11.4             | 115.5 | 5.6             | 43.8             | 123.2 | 0.2             | 4.1              | 77.2  | 2.2             | 17.7             | 98.9  |
| 1993–1997 | 0.6             | 9.1              | 80.8  | 3.4             | 34.0             | 84.4  | 1.0             | 6.5              | 125.4 | 1.8             | 15.4             | 96.6  |
| 1998–2002 | 1.6             | 16.0             | 101.6 | 7.2             | 61.7             | 97.1  | 0.8             | 7.5              | 106.1 | 2.6             | 19.7             | 104.7 |
| 2003–2007 | 2.2             | 20.6             | 118.0 | 10.0            | 70.8             | 122.6 | 0.4             | 7.5              | 83.6  | 1.2             | 13.5             | 80.8  |
| 2008–2012 | 2.4             | 24.7             | 116.6 | 7.6             | 53.6             | 110.3 | 0.6             | 9.0              | 92.9  | 2.0             | 14.9             | 99.9  |
|           | 25–34           |                  |       | 65–74           |                  |       | 25–34           |                  |       | 65–74           |                  |       |
| 1983–1987 | 3.8             | 29.9             | 117.1 | 1.2             | 28.1             | 64.2  | 1.6             | 12.3             | 114.5 | 2.2             | 27.4             | 87.6  |
| 1988–1992 | 2.0             | 18.5             | 97.0  | 2.4             | 32.2             | 91.3  | 0.8             | 8.3              | 95.7  | 3.6             | 32.4             | 124.1 |
| 1993–1997 | 3.0             | 23.1             | 118.0 | 1.6             | 22.0             | 68.9  | 2.0             | 12.0             | 143.9 | 2.4             | 20.2             | 103.8 |
| 1998–2002 | 4.0             | 29.8             | 110.4 | 4.4             | 43.6             | 95.9  | 0.4             | 8.7              | 74.8  | 4.0             | 27.8             | 132.5 |
| 2003–2007 | 3.4             | 29.2             | 94.3  | 5.6             | 49.8             | 116.1 | 1.0             | 11.5             | 88.2  | 1.6             | 16.1             | 86.6  |
| 2008–2012 | 4.4             | 36.8             | 113.0 | 4.4             | 39.9             | 100.9 | 1.0             | 13.0             | 91.0  | 1.4             | 15.1             | 84.9  |
|           | 35–44           |                  |       | >74 y/o         |                  |       | 35–44           |                  |       | >74 y/o         |                  |       |
| 1983–1987 | 5.2             | 36.3             | 114.1 | 3.4             | 83.3             | 106.3 | 1.8             | 12.6             | 106.3 | 3.6             | 59.4             | 103.0 |
| 1988–1992 | 3.4             | 24.8             | 104.7 | 2.8             | 60.0             | 93.0  | 1.2             | 9.5              | 98.5  | 3.6             | 46.5             | 97.1  |
| 1993–1997 | 3.2             | 25.6             | 104.3 | 3.0             | 52.3             | 100.5 | 1.0             | 8.5              | 100.4 | 3.4             | 35.3             | 102.5 |
| 1998–2002 | 4.0             | 35.0             | 99.3  | 3.8             | 53.2             | 101.0 | 1.4             | 11.3             | 109.4 | 3.8             | 32.1             | 103.3 |
| 2003–2007 | 5.6             | 45.4             | 113.4 | 3.8             | 43.3             | 96.2  | 1.0             | 11.3             | 89.4  | 4.6             | 30.0             | 133.8 |
| 2008–2012 | 8.4             | 51.8             | 139.2 | 4.4             | 42.1             | 101.4 | 1.4             | 12.9             | 95.5  | 2.8             | 17.8             | 92.5  |

Secondary Medical Zone ID: 155

|           | Male            |          |       |          |          |       | Female          |          |       |          |          |       |
|-----------|-----------------|----------|-------|----------|----------|-------|-----------------|----------|-------|----------|----------|-------|
|           | Suicide         |          |       | Suicide  |          |       | Suicide         |          |       | Suicide  |          |       |
|           | Num             | Rate     | × 100 | Num      | Rate     | × 100 | Num             | Rate     | × 100 | Num      | Rate     | × 100 |
|           | per year        | /100,000 |       | per year | /100,000 |       | per year        | /100,000 |       | per year | /100,000 |       |
|           | Total (>10 y/o) |          |       | 45–54    |          |       | Total (>10 y/o) |          |       | 45–54    |          |       |
| 1983–1987 | 29.4            | 35.0     | 112.3 | 6.2      | 52.5     | 103.9 | 21.8            | 18.3     | 133.3 | 3.2      | 21.2     | 122.8 |
| 1988–1992 | 21.2            | 24.8     | 102.3 | 4.6      | 38.0     | 110.7 | 19.8            | 15.1     | 132.3 | 2.8      | 18.0     | 123.2 |
| 1993–1997 | 21.6            | 24.6     | 101.0 | 3.2      | 30.7     | 84.0  | 16.8            | 12.6     | 130.0 | 2.8      | 16.9     | 130.7 |
| 1998–2002 | 32.6            | 36.3     | 105.7 | 6.4      | 53.3     | 95.3  | 12.8            | 12.0     | 95.4  | 1.0      | 12.5     | 83.2  |
| 2003–2007 | 33.2            | 39.4     | 109.4 | 7.2      | 62.7     | 112.1 | 15.0            | 13.5     | 113.7 | 2.0      | 15.4     | 112.6 |
| 2008–2012 | 31.0            | 37.1     | 111.3 | 6.2      | 57.1     | 117.4 | 11.4            | 12.3     | 97.9  | 1.2      | 13.8     | 92.8  |
|           | 15–24           |          |       | 55–64    |          |       | 15–24           |          |       | 55–64    |          |       |
| 1983–1987 | 1.4             | 14.8     | 106.0 | 4.4      | 38.9     | 91.5  | 1.2             | 8.6      | 125.8 | 3.4      | 22.5     | 113.8 |
| 1988–1992 | 0.8             | 9.6      | 96.5  | 3.0      | 28.4     | 80.0  | 0.6             | 5.5      | 104.5 | 3.4      | 21.5     | 120.3 |
| 1993–1997 | 0.8             | 10.6     | 93.6  | 4.0      | 37.4     | 92.8  | 0.8             | 6.2      | 118.7 | 2.0      | 16.0     | 100.7 |
| 1998–2002 | 3.2             | 24.1     | 152.8 | 4.8      | 49.9     | 78.5  | 0.2             | 5.7      | 81.1  | 2.2      | 18.7     | 99.3  |
| 2003–2007 | 1.6             | 19.2     | 110.3 | 7.8      | 63.0     | 109.2 | 0.6             | 8.7      | 96.4  | 0.6      | 12.2     | 72.9  |
| 2008–2012 | 2.2             | 25.8     | 121.7 | 5.8      | 48.0     | 98.9  | 0.2             | 7.5      | 77.6  | 3.0      | 18.5     | 123.9 |
|           | 25–34           |          |       | 65–74    |          |       | 25–34           |          |       | 65–74    |          |       |
| 1983–1987 | 2.6             | 25.1     | 98.1  | 4.6      | 55.4     | 126.4 | 1.4             | 11.7     | 108.7 | 4.4      | 39.6     | 126.6 |
| 1988–1992 | 2.0             | 20.1     | 105.1 | 3.4      | 37.5     | 106.4 | 1.0             | 9.2      | 105.9 | 5.2      | 39.3     | 150.8 |
| 1993–1997 | 2.6             | 23.5     | 120.1 | 3.0      | 29.8     | 93.3  | 1.4             | 10.4     | 125.4 | 3.4      | 24.0     | 122.9 |
| 1998–2002 | 2.8             | 27.7     | 102.7 | 4.4      | 42.3     | 93.1  | 1.0             | 11.2     | 96.3  | 3.0      | 22.3     | 106.3 |
| 2003–2007 | 2.6             | 29.1     | 93.8  | 3.4      | 36.8     | 85.8  | 2.6             | 18.2     | 139.9 | 2.4      | 19.4     | 104.1 |
| 2008–2012 | 2.8             | 32.9     | 101.0 | 3.0      | 34.1     | 86.4  | 0.6             | 12.1     | 84.6  | 1.8      | 17.0     | 95.7  |
|           | 35–44           |          |       | >74 y/o  |          |       | 35–44           |          |       | >74 y/o  |          |       |
| 1983–1987 | 5.8             | 41.1     | 129.2 | 4.2      | 86.2     | 110.0 | 1.6             | 12.3     | 104.5 | 6.6      | 89.0     | 154.3 |
| 1988–1992 | 3.4             | 26.0     | 109.5 | 4.0      | 69.2     | 107.3 | 1.8             | 11.6     | 119.9 | 5.0      | 54.2     | 113.2 |
| 1993–1997 | 2.0             | 20.6     | 84.2  | 6.0      | 80.9     | 155.3 | 1.0             | 8.8      | 103.0 | 5.4      | 46.9     | 136.1 |
| 1998–2002 | 3.4             | 34.2     | 97.1  | 7.4      | 81.4     | 154.5 | 1.4             | 11.7     | 113.0 | 4.0      | 30.2     | 97.3  |
| 2003–2007 | 5.0             | 47.2     | 117.7 | 5.2      | 50.6     | 112.3 | 1.2             | 12.6     | 99.8  | 5.4      | 31.4     | 139.8 |
| 2008–2012 | 4.8             | 42.1     | 113.1 | 6.2      | 52.0     | 125.4 | 1.2             | 13.2     | 97.1  | 3.4      | 19.3     | 100.3 |

Secondary Medical Zone ID: 156

|           | Male            |                  |       |                 |                  |       | Female          |                  |       |                 |                  |       |
|-----------|-----------------|------------------|-------|-----------------|------------------|-------|-----------------|------------------|-------|-----------------|------------------|-------|
|           | Suicide         |                  |       | Suicide         |                  |       | Suicide         |                  |       | Suicide         |                  |       |
|           | Num<br>per year | Rate<br>/100,000 | × 100 | Num<br>per year | Rate<br>/100,000 | × 100 | Num<br>per year | Rate<br>/100,000 | × 100 | Num<br>per year | Rate<br>/100,000 | × 100 |
|           |                 |                  |       |                 |                  |       |                 |                  |       |                 |                  |       |
|           | Total (>10 y/o) |                  |       | 45–54           |                  |       | Total (>10 y/o) |                  |       | 45–54           |                  |       |
| 1983–1987 | 5.4             | 31.4             | 90.7  | 1.2             | 44.5             | 88.1  | 4.0             | 15.2             | 105.2 | 1.4             | 22.1             | 128.2 |
| 1988–1992 | 3.4             | 23.1             | 83.8  | 0.6             | 30.7             | 89.5  | 3.8             | 13.1             | 108.7 | 0.8             | 16.4             | 111.9 |
| 1993–1997 | 5.8             | 26.3             | 111.6 | 1.0             | 36.7             | 100.4 | 1.8             | 10.3             | 86.3  | 0.6             | 14.1             | 109.4 |
| 1998–2002 | 6.4             | 35.9             | 98.3  | 1.2             | 52.7             | 94.1  | 2.2             | 12.1             | 90.5  | 0.0             | 13.4             | 89.1  |
| 2003–2007 | 5.2             | 34.8             | 90.8  | 1.4             | 57.6             | 103.1 | 2.0             | 12.4             | 93.4  | 0.4             | 14.3             | 104.3 |
| 2008–2012 | 5.8             | 34.7             | 104.1 | 1.2             | 51.1             | 105.1 | 3.2             | 13.4             | 108.9 | 0.4             | 15.7             | 105.4 |
|           | 15–24           |                  |       | 55–64           |                  |       | 15–24           |                  |       | 55–64           |                  |       |
| 1983–1987 | 0.6             | 16.4             | 117.7 | 0.8             | 36.9             | 86.9  | 0.4             | 8.0              | 117.0 | 0.8             | 20.6             | 104.5 |
| 1988–1992 | 0.2             | 9.9              | 100.3 | 1.8             | 42.8             | 120.4 | 0.2             | 5.7              | 108.6 | 0.8             | 19.1             | 106.9 |
| 1993–1997 | 0.2             | 11.3             | 99.9  | 1.6             | 44.7             | 111.1 | 0.0             | 4.9              | 93.1  | 0.2             | 14.1             | 88.4  |
| 1998–2002 | 0.4             | 16.7             | 106.0 | 0.8             | 53.7             | 84.5  | 0.0             | 6.6              | 93.8  | 0.8             | 20.3             | 107.6 |
| 2003–2007 | 0.2             | 17.3             | 99.1  | 1.0             | 52.2             | 90.5  | 0.4             | 10.8             | 120.4 | 0.2             | 15.7             | 93.7  |
| 2008–2012 | 0.2             | 21.0             | 99.0  | 1.4             | 49.9             | 102.6 | 0.2             | 10.4             | 107.2 | 0.6             | 15.9             | 106.9 |
|           | 25–34           |                  |       | 65–74           |                  |       | 25–34           |                  |       | 65–74           |                  |       |
| 1983–1987 | 1.0             | 28.7             | 112.3 | 0.4             | 38.0             | 86.7  | 0.6             | 12.9             | 119.5 | 0.4             | 26.7             | 85.4  |
| 1988–1992 | 0.2             | 17.1             | 89.5  | 0.0             | 25.3             | 71.8  | 0.2             | 8.9              | 102.1 | 0.6             | 24.5             | 94.1  |
| 1993–1997 | 0.8             | 22.9             | 117.3 | 0.2             | 24.5             | 76.7  | 0.0             | 7.6              | 91.8  | 0.4             | 17.5             | 89.9  |
| 1998–2002 | 0.6             | 27.7             | 102.5 | 1.2             | 45.7             | 100.6 | 0.0             | 10.7             | 92.5  | 0.8             | 22.2             | 105.9 |
| 2003–2007 | 0.2             | 28.4             | 91.5  | 0.8             | 40.1             | 93.5  | 0.0             | 12.0             | 92.6  | 0.2             | 16.3             | 87.7  |
| 2008–2012 | 0.6             | 34.0             | 104.3 | 1.2             | 43.0             | 108.9 | 0.2             | 14.5             | 101.3 | 0.8             | 19.7             | 110.5 |
|           | 35–44           |                  |       | >74 y/o         |                  |       | 35–44           |                  |       | >74 y/o         |                  |       |
| 1983–1987 | 1.0             | 32.5             | 102.0 | 0.4             | 66.9             | 85.4  | 0.4             | 12.2             | 103.3 | 0.0             | 29.0             | 50.3  |
| 1988–1992 | 0.4             | 21.5             | 90.5  | 0.2             | 48.7             | 75.4  | 0.4             | 10.3             | 106.9 | 0.8             | 43.9             | 91.7  |
| 1993–1997 | 1.0             | 28.9             | 117.8 | 0.8             | 54.7             | 105.0 | 0.4             | 9.6              | 113.4 | 0.2             | 21.0             | 60.9  |
| 1998–2002 | 1.6             | 45.2             | 128.4 | 0.6             | 46.9             | 89.0  | 0.2             | 10.4             | 100.6 | 0.4             | 21.9             | 70.5  |
| 2003–2007 | 0.2             | 32.3             | 80.6  | 1.4             | 53.1             | 118.0 | 0.0             | 11.6             | 91.8  | 0.8             | 22.1             | 98.5  |
| 2008–2012 | 0.4             | 35.6             | 95.8  | 0.8             | 39.2             | 94.5  | 0.2             | 13.6             | 100.1 | 0.8             | 19.4             | 101.1 |

Secondary Medical Zone ID: 157

|                 | Male            |                  |       |                 |                  |       | Female          |                  |       |                 |                  |       |
|-----------------|-----------------|------------------|-------|-----------------|------------------|-------|-----------------|------------------|-------|-----------------|------------------|-------|
|                 | Suicide         |                  |       | Suicide         |                  |       | Suicide         |                  |       | Suicide         |                  |       |
|                 | Num<br>per year | Rate<br>/100,000 | × 100 | Num<br>per year | Rate<br>/100,000 | × 100 | Num<br>per year | Rate<br>/100,000 | × 100 | Num<br>per year | Rate<br>/100,000 | × 100 |
|                 |                 |                  |       |                 |                  |       |                 |                  |       |                 |                  |       |
| Total (>10 y/o) | 45–54           | Total (>10 y/o)  | 45–54 |                 |                  |       |                 |                  |       |                 |                  |       |
| 1983–1987       | 50.4            | 31.3             | 94.8  | 9.8             | 41.0             | 81.2  | 29.8            | 15.2             | 99.9  | 5.0             | 18.5             | 107.2 |
| 1988–1992       | 42.6            | 24.1             | 96.7  | 9.4             | 34.7             | 100.9 | 28.0            | 12.9             | 100.3 | 3.0             | 12.5             | 85.6  |
| 1993–1997       | 43.8            | 23.2             | 91.4  | 12.6            | 40.3             | 110.2 | 24.0            | 10.7             | 96.3  | 4.6             | 14.4             | 111.3 |
| 1998–2002       | 68.4            | 34.2             | 94.9  | 15.4            | 52.4             | 93.6  | 27.6            | 11.7             | 93.4  | 5.2             | 16.6             | 110.3 |
| 2003–2007       | 68.0            | 34.0             | 92.5  | 12.8            | 49.4             | 88.3  | 25.8            | 11.9             | 91.5  | 2.0             | 10.2             | 74.2  |
| 2008–2012       | 73.2            | 36.8             | 105.3 | 12.6            | 49.2             | 101.3 | 29.2            | 13.2             | 101.6 | 3.2             | 13.7             | 91.6  |
|                 | 15–24           |                  |       | 55–64           |                  |       | 15–24           |                  |       | 55–64           |                  |       |
| 1983–1987       | 3.6             | 14.4             | 103.4 | 9.0             | 41.6             | 97.9  | 2.8             | 9.4              | 137.7 | 5.2             | 20.4             | 103.2 |
| 1988–1992       | 2.2             | 8.7              | 87.5  | 8.8             | 36.3             | 102.2 | 2.0             | 6.6              | 124.5 | 4.6             | 17.5             | 98.2  |
| 1993–1997       | 4.2             | 13.4             | 118.4 | 8.6             | 36.2             | 89.9  | 2.0             | 6.6              | 125.7 | 5.2             | 18.5             | 116.7 |
| 1998–2002       | 5.6             | 20.0             | 126.8 | 13.0            | 51.9             | 81.7  | 1.6             | 7.0              | 99.6  | 4.0             | 16.2             | 86.2  |
| 2003–2007       | 3.6             | 16.9             | 96.8  | 19.2            | 64.6             | 111.9 | 2.0             | 9.6              | 106.9 | 5.0             | 16.7             | 99.7  |
| 2008–2012       | 6.0             | 26.5             | 124.8 | 14.0            | 48.6             | 100.0 | 2.4             | 11.6             | 119.4 | 6.8             | 19.5             | 130.9 |
|                 | 25–34           |                  |       | 65–74           |                  |       | 25–34           |                  |       | 65–74           |                  |       |
| 1983–1987       | 7.0             | 27.3             | 106.8 | 6.0             | 45.3             | 103.4 | 2.0             | 9.0              | 84.0  | 4.4             | 26.4             | 84.3  |
| 1988–1992       | 4.6             | 18.5             | 96.7  | 6.4             | 39.7             | 112.8 | 2.2             | 8.9              | 102.5 | 7.2             | 33.1             | 126.9 |
| 1993–1997       | 4.4             | 16.7             | 85.4  | 4.6             | 25.6             | 80.3  | 1.2             | 6.2              | 74.6  | 3.4             | 15.5             | 79.4  |
| 1998–2002       | 7.2             | 24.1             | 89.1  | 12.0            | 53.2             | 116.9 | 1.6             | 8.0              | 69.4  | 5.4             | 21.3             | 101.4 |
| 2003–2007       | 8.2             | 27.9             | 90.1  | 8.4             | 38.8             | 90.5  | 3.4             | 12.5             | 95.9  | 3.8             | 16.1             | 86.7  |
| 2008–2012       | 10.4            | 38.2             | 117.4 | 8.4             | 36.3             | 91.8  | 4.0             | 15.8             | 110.1 | 3.4             | 14.7             | 82.8  |
|                 | 35–44           |                  |       | >74 y/o         |                  |       | 35–44           |                  |       | >74 y/o         |                  |       |
| 1983–1987       | 9.4             | 30.8             | 96.9  | 5.6             | 74.3             | 94.9  | 2.8             | 10.2             | 86.3  | 7.6             | 63.6             | 110.2 |
| 1988–1992       | 7.8             | 25.6             | 108.0 | 3.4             | 41.4             | 64.2  | 3.6             | 11.1             | 115.4 | 5.4             | 36.4             | 76.2  |
| 1993–1997       | 4.2             | 17.5             | 71.3  | 5.0             | 46.4             | 89.1  | 2.4             | 8.9              | 104.6 | 5.0             | 27.3             | 79.2  |
| 1998–2002       | 8.4             | 32.3             | 91.7  | 6.4             | 47.6             | 90.3  | 2.0             | 8.9              | 85.6  | 7.6             | 31.9             | 102.7 |
| 2003–2007       | 9.4             | 33.9             | 84.7  | 6.4             | 38.0             | 84.3  | 3.6             | 13.0             | 103.1 | 6.0             | 20.8             | 92.8  |
| 2008–2012       | 14.2            | 42.8             | 115.1 | 7.4             | 36.2             | 87.2  | 3.4             | 12.3             | 90.5  | 6.0             | 18.1             | 93.9  |

Secondary Medical Zone ID: 158

|                 | Male            |                  |       |                 |                  |       | Female          |                  |       |                 |                  |       |
|-----------------|-----------------|------------------|-------|-----------------|------------------|-------|-----------------|------------------|-------|-----------------|------------------|-------|
|                 | Suicide         |                  |       | Suicide         |                  |       | Suicide         |                  |       | Suicide         |                  |       |
|                 | Num<br>per year | Rate<br>/100,000 | × 100 | Num<br>per year | Rate<br>/100,000 | × 100 | Num<br>per year | Rate<br>/100,000 | × 100 | Num<br>per year | Rate<br>/100,000 | × 100 |
|                 |                 |                  |       |                 |                  |       |                 |                  |       |                 |                  |       |
| Total (>10 y/o) | 45–54           | Total (>10 y/o)  | 45–54 |                 |                  |       |                 |                  |       |                 |                  |       |
| 1983–1987       | 11.8            | 35.1             | 117.9 | 1.6             | 43.4             | 85.8  | 7.8             | 17.3             | 125.4 | 0.2             | 14.1             | 81.6  |
| 1988–1992       | 9.2             | 25.9             | 115.0 | 1.2             | 31.3             | 91.2  | 5.6             | 13.1             | 108.3 | 0.4             | 13.5             | 92.7  |
| 1993–1997       | 11.8            | 28.1             | 130.5 | 2.4             | 40.3             | 110.1 | 5.8             | 11.7             | 118.7 | 1.0             | 14.4             | 111.9 |
| 1998–2002       | 12.6            | 36.1             | 104.3 | 3.8             | 64.1             | 114.5 | 2.8             | 11.3             | 78.4  | 0.4             | 13.7             | 90.9  |
| 2003–2007       | 13.8            | 39.2             | 113.1 | 3.2             | 65.0             | 116.2 | 6.2             | 13.2             | 114.5 | 1.0             | 15.6             | 113.9 |
| 2008–2012       | 11.0            | 35.0             | 103.1 | 1.8             | 48.2             | 99.2  | 3.6             | 12.2             | 93.5  | 0.0             | 12.2             | 81.5  |
|                 | 15–24           |                  |       | 55–64           |                  |       | 15–24           |                  |       | 55–64           |                  |       |
| 1983–1987       | 1.0             | 17.5             | 125.2 | 2.4             | 48.2             | 113.4 | 0.4             | 7.4              | 108.7 | 1.6             | 23.7             | 120.1 |
| 1988–1992       | 1.0             | 12.4             | 125.7 | 1.0             | 30.0             | 84.4  | 0.4             | 6.1              | 115.4 | 1.2             | 19.6             | 109.7 |
| 1993–1997       | 1.2             | 14.6             | 129.0 | 3.2             | 52.7             | 131.0 | 0.4             | 6.1              | 116.2 | 0.4             | 13.9             | 87.6  |
| 1998–2002       | 0.6             | 16.3             | 103.1 | 2.4             | 59.3             | 93.3  | 0.2             | 7.0              | 99.1  | 0.4             | 16.7             | 88.5  |
| 2003–2007       | 0.2             | 15.9             | 91.2  | 2.6             | 55.1             | 95.4  | 0.2             | 8.8              | 98.0  | 1.4             | 19.0             | 113.5 |
| 2008–2012       | 0.4             | 20.5             | 96.6  | 1.4             | 41.3             | 85.1  | 0.4             | 10.9             | 112.1 | 0.4             | 13.6             | 91.2  |
|                 | 25–34           |                  |       | 65–74           |                  |       | 25–34           |                  |       | 65–74           |                  |       |
| 1983–1987       | 1.6             | 30.3             | 118.7 | 2.4             | 64.1             | 146.4 | 0.4             | 10.7             | 99.0  | 1.0             | 30.9             | 98.8  |
| 1988–1992       | 1.2             | 23.4             | 122.3 | 2.2             | 49.6             | 140.6 | 0.6             | 10.0             | 115.3 | 1.0             | 25.9             | 99.2  |
| 1993–1997       | 0.8             | 19.9             | 101.9 | 1.0             | 30.0             | 94.0  | 0.2             | 7.9              | 94.7  | 1.8             | 27.5             | 140.9 |
| 1998–2002       | 0.6             | 23.8             | 88.1  | 2.0             | 47.2             | 103.8 | 0.0             | 9.7              | 83.6  | 0.4             | 16.8             | 80.0  |
| 2003–2007       | 1.2             | 31.1             | 100.3 | 2.6             | 52.2             | 121.6 | 0.2             | 11.7             | 90.2  | 0.6             | 17.2             | 92.2  |
| 2008–2012       | 1.4             | 35.3             | 108.4 | 1.4             | 38.1             | 96.5  | 0.0             | 12.3             | 86.2  | 0.6             | 17.0             | 95.3  |
|                 | 35–44           |                  |       | >74 y/o         |                  |       | 35–44           |                  |       | >74 y/o         |                  |       |
| 1983–1987       | 1.4             | 29.8             | 93.8  | 1.4             | 87.4             | 111.6 | 1.0             | 13.5             | 114.6 | 3.2             | 108.9            | 188.7 |
| 1988–1992       | 1.2             | 23.9             | 100.9 | 1.4             | 72.1             | 111.8 | 0.6             | 10.2             | 105.3 | 1.4             | 49.0             | 102.4 |
| 1993–1997       | 1.4             | 27.5             | 112.3 | 1.8             | 69.6             | 133.7 | 0.6             | 9.7              | 113.6 | 1.4             | 37.9             | 110.0 |
| 1998–2002       | 1.0             | 31.4             | 89.2  | 2.2             | 67.6             | 128.3 | 0.0             | 8.4              | 81.6  | 1.4             | 31.5             | 101.6 |
| 2003–2007       | 2.8             | 53.3             | 133.0 | 1.2             | 41.2             | 91.5  | 0.4             | 12.3             | 97.1  | 2.4             | 34.8             | 155.0 |
| 2008–2012       | 2.4             | 42.9             | 115.4 | 2.2             | 48.7             | 117.4 | 0.2             | 12.2             | 90.3  | 2.0             | 25.3             | 131.8 |

Secondary Medical Zone ID: 159

|           | Male            |                  |       |                 |                  |       | Female          |                  |       |                 |                  |       |
|-----------|-----------------|------------------|-------|-----------------|------------------|-------|-----------------|------------------|-------|-----------------|------------------|-------|
|           | Suicide         |                  |       | Suicide         |                  |       | Suicide         |                  |       | Suicide         |                  |       |
|           | Num<br>per year | Rate<br>/100,000 | × 100 | Num<br>per year | Rate<br>/100,000 | × 100 | Num<br>per year | Rate<br>/100,000 | × 100 | Num<br>per year | Rate<br>/100,000 | × 100 |
|           |                 |                  |       |                 |                  |       |                 |                  |       |                 |                  |       |
|           | Total (>10 y/o) |                  |       | 45–54           |                  |       | Total (>10 y/o) |                  |       | 45–54           |                  |       |
| 1983–1987 | 61.4            | 28.6             | 85.4  | 12.0            | 36.6             | 72.3  | 38.8            | 14.7             | 95.9  | 5.4             | 15.4             | 89.6  |
| 1988–1992 | 58.2            | 24.0             | 96.9  | 12.2            | 32.6             | 95.0  | 39.4            | 12.8             | 102.8 | 4.4             | 12.5             | 85.8  |
| 1993–1997 | 58.6            | 22.9             | 89.7  | 13.8            | 33.1             | 90.4  | 35.6            | 11.1             | 103.2 | 6.0             | 13.9             | 107.6 |
| 1998–2002 | 88.0            | 32.7             | 91.0  | 17.4            | 43.9             | 78.4  | 46.0            | 13.7             | 111.6 | 5.2             | 13.4             | 89.2  |
| 2003–2007 | 92.4            | 36.2             | 94.7  | 22.2            | 60.7             | 108.5 | 40.0            | 12.4             | 102.8 | 4.8             | 13.3             | 97.4  |
| 2008–2012 | 84.0            | 33.1             | 94.2  | 15.6            | 46.9             | 96.6  | 37.4            | 12.9             | 99.0  | 6.2             | 17.2             | 115.2 |
|           | 15–24           |                  |       | 55–64           |                  |       | 15–24           |                  |       | 55–64           |                  |       |
| 1983–1987 | 3.6             | 11.9             | 85.2  | 9.4             | 33.0             | 77.7  | 2.4             | 6.9              | 101.7 | 5.8             | 17.5             | 88.8  |
| 1988–1992 | 5.2             | 12.9             | 130.0 | 10.6            | 32.2             | 90.6  | 1.8             | 5.0              | 95.2  | 5.8             | 16.4             | 91.9  |
| 1993–1997 | 3.2             | 9.8              | 86.4  | 9.4             | 29.8             | 73.9  | 2.0             | 5.4              | 104.2 | 5.6             | 15.5             | 97.6  |
| 1998–2002 | 6.8             | 20.0             | 126.7 | 22.2            | 61.7             | 97.1  | 2.8             | 8.3              | 117.5 | 6.2             | 17.2             | 91.3  |
| 2003–2007 | 7.2             | 23.8             | 136.7 | 20.0            | 50.7             | 87.9  | 3.2             | 11.1             | 123.9 | 6.2             | 15.6             | 93.2  |
| 2008–2012 | 5.6             | 23.2             | 109.3 | 20.6            | 51.2             | 105.4 | 1.6             | 8.1              | 83.1  | 4.8             | 12.8             | 86.0  |
|           | 25–34           |                  |       | 65–74           |                  |       | 25–34           |                  |       | 65–74           |                  |       |
| 1983–1987 | 7.8             | 23.5             | 92.1  | 7.6             | 42.8             | 97.7  | 3.8             | 10.7             | 99.8  | 6.6             | 28.2             | 90.1  |
| 1988–1992 | 5.4             | 17.0             | 89.2  | 7.6             | 35.4             | 100.6 | 3.8             | 10.3             | 119.1 | 8.6             | 29.9             | 114.7 |
| 1993–1997 | 6.8             | 19.4             | 99.3  | 6.8             | 26.6             | 83.3  | 3.0             | 8.4              | 101.4 | 6.2             | 19.2             | 98.5  |
| 1998–2002 | 8.0             | 22.3             | 82.5  | 13.2            | 44.6             | 98.0  | 6.2             | 14.8             | 127.8 | 9.6             | 26.3             | 125.3 |
| 2003–2007 | 11.0            | 30.4             | 98.0  | 8.6             | 30.6             | 71.4  | 3.6             | 11.0             | 84.9  | 9.0             | 24.1             | 129.5 |
| 2008–2012 | 9.4             | 31.9             | 98.1  | 10.2            | 33.2             | 83.9  | 3.6             | 13.1             | 91.2  | 6.2             | 17.5             | 98.2  |
|           | 35–44           |                  |       | >74 y/o         |                  |       | 35–44           |                  |       | >74 y/o         |                  |       |
| 1983–1987 | 11.0            | 26.6             | 83.5  | 9.4             | 93.2             | 118.9 | 3.0             | 8.4              | 71.5  | 11.6            | 75.2             | 130.3 |
| 1988–1992 | 9.2             | 22.3             | 94.0  | 8.0             | 63.7             | 98.7  | 3.6             | 9.0              | 93.1  | 11.2            | 54.1             | 113.1 |
| 1993–1997 | 9.2             | 24.5             | 99.7  | 8.6             | 56.9             | 109.2 | 4.6             | 11.2             | 131.3 | 8.2             | 32.2             | 93.6  |
| 1998–2002 | 9.8             | 29.0             | 82.3  | 10.4            | 55.0             | 104.3 | 3.4             | 9.9              | 96.0  | 12.2            | 37.6             | 121.0 |
| 2003–2007 | 14.2            | 39.4             | 98.4  | 9.2             | 38.9             | 86.4  | 2.8             | 9.5              | 75.1  | 10.4            | 25.9             | 115.3 |
| 2008–2012 | 12.2            | 32.8             | 88.2  | 10.4            | 36.8             | 88.6  | 6.0             | 15.1             | 111.2 | 9.0             | 19.6             | 102.0 |



Secondary Medical Zone ID: 160

|           | Male            |          |       |          |          |       | Female          |          |       |          |          |       |
|-----------|-----------------|----------|-------|----------|----------|-------|-----------------|----------|-------|----------|----------|-------|
|           | Suicide         |          |       | Suicide  |          |       | Suicide         |          |       | Suicide  |          |       |
|           | Num             | Rate     | × 100 | Num      | Rate     | × 100 | Num             | Rate     | × 100 | Num      | Rate     | × 100 |
|           | per year        | /100,000 |       | per year | /100,000 |       | per year        | /100,000 |       | per year | /100,000 |       |
|           | Total (>10 y/o) |          |       | 45–54    |          |       | Total (>10 y/o) |          |       | 45–54    |          |       |
| 1983–1987 | 16.6            | 34.2     | 108.3 | 3.8      | 53.1     | 105.1 | 12.4            | 17.8     | 127.5 | 3.0      | 25.0     | 145.2 |
| 1988–1992 | 13.8            | 26.1     | 112.4 | 2.4      | 35.5     | 103.3 | 12.8            | 15.1     | 141.0 | 1.4      | 16.1     | 110.4 |
| 1993–1997 | 14.8            | 27.0     | 114.5 | 2.2      | 33.6     | 91.9  | 9.4             | 11.5     | 123.7 | 0.8      | 12.5     | 96.8  |
| 1998–2002 | 19.8            | 36.9     | 109.1 | 3.6      | 50.9     | 91.0  | 12.0            | 14.0     | 132.4 | 1.0      | 14.7     | 98.0  |
| 2003–2007 | 20.8            | 39.0     | 116.3 | 5.4      | 70.8     | 126.5 | 7.6             | 12.3     | 104.4 | 0.4      | 11.7     | 85.6  |
| 2008–2012 | 20.2            | 37.6     | 120.5 | 3.0      | 49.6     | 102.1 | 6.0             | 12.3     | 95.8  | 0.6      | 13.7     | 92.0  |
| -----     |                 |          |       |          |          |       |                 |          |       |          |          |       |
|           | 15–24           |          |       | 55–64    |          |       | 15–24           |          |       | 55–64    |          |       |
| 1983–1987 | 1.4             | 17.5     | 125.3 | 2.0      | 35.2     | 82.8  | 0.2             | 6.1      | 89.5  | 1.2      | 17.7     | 89.9  |
| 1988–1992 | 0.4             | 9.2      | 93.2  | 3.2      | 40.4     | 113.8 | 0.0             | 4.1      | 78.6  | 1.8      | 19.6     | 109.9 |
| 1993–1997 | 0.6             | 11.1     | 98.5  | 3.4      | 45.7     | 113.5 | 0.6             | 6.3      | 121.1 | 1.4      | 17.1     | 107.6 |
| 1998–2002 | 0.8             | 15.9     | 100.3 | 4.0      | 63.8     | 100.5 | 0.6             | 8.0      | 113.4 | 1.6      | 20.2     | 107.5 |
| 2003–2007 | 0.2             | 14.6     | 83.8  | 5.0      | 65.1     | 112.8 | 0.2             | 8.1      | 89.7  | 1.0      | 16.1     | 96.4  |
| 2008–2012 | 1.4             | 25.1     | 118.1 | 3.8      | 49.0     | 100.9 | 0.4             | 10.0     | 102.9 | 0.8      | 14.0     | 93.6  |
| -----     |                 |          |       |          |          |       |                 |          |       |          |          |       |
|           | 25–34           |          |       | 65–74    |          |       | 25–34           |          |       | 65–74    |          |       |
| 1983–1987 | 1.6             | 24.7     | 96.8  | 2.6      | 51.8     | 118.4 | 1.6             | 15.0     | 138.9 | 1.4      | 27.8     | 89.0  |
| 1988–1992 | 1.4             | 21.0     | 110.0 | 1.2      | 29.6     | 84.1  | 1.0             | 10.7     | 123.7 | 2.2      | 30.2     | 115.9 |
| 1993–1997 | 2.6             | 28.8     | 147.3 | 1.8      | 31.0     | 97.2  | 0.2             | 7.3      | 87.3  | 1.0      | 16.5     | 84.6  |
| 1998–2002 | 1.4             | 26.3     | 97.5  | 4.0      | 54.5     | 119.8 | 1.4             | 14.6     | 125.6 | 1.6      | 21.2     | 101.0 |
| 2003–2007 | 1.4             | 29.4     | 94.9  | 2.8      | 45.4     | 105.9 | 1.0             | 14.5     | 111.4 | 0.8      | 16.0     | 85.9  |
| 2008–2012 | 1.4             | 32.2     | 98.8  | 2.8      | 44.1     | 111.7 | 0.2             | 12.4     | 86.4  | 0.8      | 16.3     | 91.9  |
| -----     |                 |          |       |          |          |       |                 |          |       |          |          |       |
|           | 35–44           |          |       | >74 y/o  |          |       | 35–44           |          |       | >74 y/o  |          |       |
| 1983–1987 | 3.0             | 36.0     | 113.0 | 2.2      | 88.8     | 113.4 | 1.2             | 13.2     | 112.2 | 3.8      | 88.0     | 152.6 |
| 1988–1992 | 2.6             | 28.4     | 119.6 | 2.6      | 80.3     | 124.5 | 0.4             | 8.7      | 89.6  | 6.0      | 102.3    | 213.8 |
| 1993–1997 | 2.0             | 26.6     | 108.6 | 2.0      | 56.4     | 108.4 | 0.4             | 7.8      | 92.2  | 5.0      | 70.3     | 204.4 |
| 1998–2002 | 2.8             | 40.3     | 114.4 | 3.2      | 66.5     | 126.1 | 0.2             | 8.5      | 82.3  | 5.6      | 63.4     | 204.1 |
| 2003–2007 | 2.4             | 41.4     | 103.3 | 3.6      | 59.1     | 131.2 | 0.4             | 11.4     | 90.2  | 3.8      | 37.0     | 165.0 |
| 2008–2012 | 4.0             | 48.5     | 130.3 | 3.8      | 53.7     | 129.4 | 0.4             | 12.3     | 91.0  | 2.8      | 24.9     | 129.3 |

Secondary Medical Zone ID: 161

|           | Male            |          |       |          |          |       | Female          |          |       |          |          |       |
|-----------|-----------------|----------|-------|----------|----------|-------|-----------------|----------|-------|----------|----------|-------|
|           | Suicide         |          |       | Suicide  |          |       | Suicide         |          |       | Suicide  |          |       |
|           | Num             | Rate     | × 100 | Num      | Rate     | × 100 | Num             | Rate     | × 100 | Num      | Rate     | × 100 |
|           | per year        | /100,000 |       | per year | /100,000 |       | per year        | /100,000 |       | per year | /100,000 |       |
|           | Total (>10 y/o) |          |       | 45–54    |          |       | Total (>10 y/o) |          |       | 45–54    |          |       |
| 1983–1987 | 82.4            | 28.6     | 85.2  | 20.4     | 41.1     | 81.3  | 48.4            | 14.8     | 96.4  | 8.2      | 16.1     | 93.5  |
| 1988–1992 | 66.2            | 20.8     | 83.0  | 14.4     | 26.6     | 77.3  | 44.6            | 11.9     | 93.8  | 6.6      | 12.3     | 83.9  |
| 1993–1997 | 75.2            | 21.7     | 85.7  | 17.4     | 29.4     | 80.4  | 44.8            | 10.8     | 101.2 | 6.0      | 10.3     | 79.5  |
| 1998–2002 | 122.8           | 33.9     | 93.1  | 28.8     | 50.7     | 90.6  | 58.2            | 13.1     | 107.5 | 7.6      | 13.2     | 87.5  |
| 2003–2007 | 129.2           | 34.7     | 96.2  | 24.6     | 51.1     | 91.3  | 55.6            | 12.6     | 104.5 | 6.8      | 13.4     | 97.5  |
| 2008–2012 | 117.0           | 32.5     | 93.3  | 20.0     | 43.8     | 90.1  | 46.8            | 11.4     | 89.5  | 4.4      | 10.6     | 71.0  |
| -----     |                 |          |       |          |          |       |                 |          |       |          |          |       |
|           | 15–24           |          |       | 55–64    |          |       | 15–24           |          |       | 55–64    |          |       |
| 1983–1987 | 9.0             | 16.5     | 118.3 | 11.0     | 33.7     | 79.2  | 3.0             | 5.5      | 81.2  | 8.4      | 21.4     | 108.2 |
| 1988–1992 | 5.0             | 8.8      | 88.5  | 16.8     | 38.6     | 108.8 | 1.6             | 3.2      | 60.3  | 10.6     | 22.3     | 124.7 |
| 1993–1997 | 5.8             | 10.4     | 91.9  | 17.8     | 37.6     | 93.3  | 3.4             | 5.4      | 104.3 | 8.8      | 17.3     | 108.6 |
| 1998–2002 | 9.8             | 19.1     | 121.0 | 32.2     | 61.4     | 96.6  | 3.8             | 7.4      | 104.8 | 10.0     | 18.2     | 96.9  |
| 2003–2007 | 7.4             | 17.5     | 100.4 | 34.6     | 59.8     | 103.6 | 2.8             | 7.2      | 79.5  | 13.6     | 20.9     | 125.0 |
| 2008–2012 | 5.8             | 16.6     | 78.0  | 24.8     | 45.5     | 93.7  | 3.2             | 8.6      | 88.7  | 8.6      | 14.6     | 97.7  |
| -----     |                 |          |       |          |          |       |                 |          |       |          |          |       |
|           | 25–34           |          |       | 65–74    |          |       | 25–34           |          |       | 65–74    |          |       |
| 1983–1987 | 10.4            | 21.9     | 85.5  | 6.2      | 34.2     | 78.0  | 6.2             | 11.5     | 106.8 | 7.6      | 30.3     | 96.9  |
| 1988–1992 | 5.2             | 11.9     | 62.5  | 7.4      | 33.1     | 94.0  | 2.4             | 5.7      | 66.2  | 8.0      | 26.6     | 101.9 |
| 1993–1997 | 8.6             | 16.9     | 86.7  | 9.8      | 33.2     | 104.0 | 4.0             | 7.6      | 91.3  | 7.0      | 19.6     | 100.7 |
| 1998–2002 | 16.2            | 28.3     | 104.6 | 14.0     | 39.6     | 87.2  | 7.0             | 11.9     | 102.5 | 10.2     | 24.1     | 114.5 |
| 2003–2007 | 14.6            | 27.6     | 88.8  | 17.8     | 43.0     | 100.2 | 7.2             | 13.1     | 100.5 | 9.4      | 19.9     | 106.8 |
| 2008–2012 | 17.0            | 36.2     | 111.2 | 16.6     | 36.3     | 91.9  | 5.0             | 11.9     | 83.2  | 7.8      | 15.7     | 88.2  |
| -----     |                 |          |       |          |          |       |                 |          |       |          |          |       |
|           | 35–44           |          |       | >74 y/o  |          |       | 35–44           |          |       | >74 y/o  |          |       |
| 1983–1987 | 16.0            | 25.7     | 80.7  | 9.2      | 86.6     | 110.6 | 6.6             | 10.4     | 88.1  | 8.4      | 58.3     | 101.0 |
| 1988–1992 | 9.2             | 16.5     | 69.5  | 8.2      | 62.3     | 96.5  | 5.6             | 9.2      | 95.2  | 9.6      | 47.6     | 99.5  |
| 1993–1997 | 8.6             | 18.1     | 73.8  | 7.0      | 46.4     | 89.1  | 4.2             | 8.1      | 95.6  | 11.4     | 43.6     | 126.7 |
| 1998–2002 | 15.4            | 32.5     | 92.3  | 6.0      | 34.9     | 66.2  | 6.0             | 11.7     | 112.9 | 13.6     | 41.1     | 132.4 |
| 2003–2007 | 17.6            | 34.5     | 86.1  | 12.4     | 48.9     | 108.5 | 5.0             | 10.3     | 81.4  | 10.6     | 25.6     | 113.9 |
| 2008–2012 | 20.4            | 35.6     | 95.6  | 12.0     | 38.1     | 91.8  | 7.0             | 12.4     | 91.5  | 10.8     | 21.3     | 110.9 |

Secondary Medical Zone ID: 162

|           | Male            |                  |       |                 |                  |       | Female          |                  |       |                 |                  |       |
|-----------|-----------------|------------------|-------|-----------------|------------------|-------|-----------------|------------------|-------|-----------------|------------------|-------|
|           | Suicide         |                  |       | Suicide         |                  |       | Suicide         |                  |       | Suicide         |                  |       |
|           | Num<br>per year | Rate<br>/100,000 | × 100 | Num<br>per year | Rate<br>/100,000 | × 100 | Num<br>per year | Rate<br>/100,000 | × 100 | Num<br>per year | Rate<br>/100,000 | × 100 |
|           |                 |                  |       |                 |                  |       |                 |                  |       |                 |                  |       |
|           | Total (>10 y/o) |                  |       | 45–54           |                  |       | Total (>10 y/o) |                  |       | 45–54           |                  |       |
| 1983–1987 | 42.8            | 29.7             | 87.1  | 9.4             | 40.5             | 80.1  | 28.6            | 16.1             | 106.7 | 5.8             | 21.2             | 122.9 |
| 1988–1992 | 27.8            | 19.1             | 71.0  | 3.8             | 18.5             | 53.8  | 23.6            | 12.2             | 96.0  | 3.6             | 14.1             | 96.1  |
| 1993–1997 | 33.6            | 21.0             | 78.0  | 8.6             | 30.7             | 83.8  | 19.4            | 9.7              | 88.6  | 2.0             | 9.2              | 71.1  |
| 1998–2002 | 50.0            | 29.5             | 77.6  | 12.6            | 45.1             | 80.6  | 20.6            | 10.3             | 80.8  | 2.8             | 11.7             | 77.5  |
| 2003–2007 | 55.2            | 31.5             | 83.8  | 10.6            | 44.1             | 78.8  | 26.8            | 12.7             | 103.3 | 3.2             | 12.9             | 94.0  |
| 2008–2012 | 48.0            | 30.1             | 80.4  | 9.0             | 42.4             | 87.3  | 22.2            | 11.7             | 90.4  | 2.8             | 13.1             | 88.0  |
|           | 15–24           |                  |       | 55–64           |                  |       | 15–24           |                  |       | 55–64           |                  |       |
| 1983–1987 | 4.4             | 16.5             | 118.4 | 6.4             | 35.6             | 83.9  | 1.2             | 5.2              | 76.8  | 3.2             | 16.8             | 85.1  |
| 1988–1992 | 1.4             | 7.0              | 71.1  | 7.2             | 32.8             | 92.3  | 1.6             | 5.2              | 99.3  | 5.0             | 20.2             | 113.0 |
| 1993–1997 | 4.0             | 13.0             | 114.8 | 6.0             | 29.1             | 72.3  | 2.0             | 6.2              | 118.6 | 2.8             | 13.0             | 81.8  |
| 1998–2002 | 3.6             | 15.2             | 96.2  | 9.8             | 43.4             | 68.3  | 0.6             | 4.6              | 65.8  | 5.2             | 19.7             | 104.4 |
| 2003–2007 | 3.6             | 17.3             | 99.3  | 14.2            | 51.1             | 88.6  | 2.0             | 9.4              | 104.8 | 5.6             | 18.4             | 109.6 |
| 2008–2012 | 3.8             | 20.7             | 97.8  | 10.0            | 38.3             | 78.8  | 1.4             | 8.6              | 88.6  | 3.6             | 13.4             | 89.6  |
|           | 25–34           |                  |       | 65–74           |                  |       | 25–34           |                  |       | 65–74           |                  |       |
| 1983–1987 | 4.8             | 21.2             | 82.8  | 5.6             | 48.6             | 111.1 | 2.8             | 10.9             | 101.2 | 4.6             | 31.1             | 99.7  |
| 1988–1992 | 4.0             | 18.0             | 94.1  | 3.6             | 30.4             | 86.2  | 0.6             | 5.2              | 59.8  | 4.8             | 28.0             | 107.3 |
| 1993–1997 | 3.4             | 16.0             | 81.8  | 3.6             | 24.3             | 76.2  | 1.2             | 6.5              | 77.6  | 2.6             | 15.0             | 76.8  |
| 1998–2002 | 4.6             | 20.7             | 76.7  | 7.6             | 40.9             | 89.9  | 1.2             | 7.7              | 66.6  | 3.6             | 18.0             | 85.5  |
| 2003–2007 | 8.2             | 31.9             | 102.9 | 5.4             | 30.2             | 70.4  | 3.2             | 13.1             | 100.8 | 4.6             | 19.7             | 105.8 |
| 2008–2012 | 6.8             | 31.7             | 97.3  | 6.0             | 30.4             | 77.1  | 2.2             | 12.4             | 86.6  | 4.4             | 18.1             | 101.9 |
|           | 35–44           |                  |       | >74 y/o         |                  |       | 35–44           |                  |       | >74 y/o         |                  |       |
| 1983–1987 | 7.2             | 25.4             | 79.9  | 5.0             | 79.5             | 101.5 | 3.0             | 10.7             | 90.7  | 7.8             | 82.8             | 143.5 |
| 1988–1992 | 3.4             | 14.2             | 60.0  | 4.4             | 58.8             | 91.1  | 2.0             | 7.9              | 82.3  | 6.0             | 49.6             | 103.6 |
| 1993–1997 | 4.6             | 19.5             | 79.5  | 3.2             | 39.7             | 76.3  | 2.4             | 8.9              | 104.2 | 6.4             | 42.0             | 122.1 |
| 1998–2002 | 6.2             | 28.6             | 81.2  | 5.6             | 52.5             | 99.6  | 1.0             | 6.7              | 64.7  | 6.0             | 32.4             | 104.5 |
| 2003–2007 | 6.8             | 30.9             | 77.1  | 6.2             | 44.4             | 98.6  | 2.6             | 11.6             | 92.1  | 5.6             | 24.4             | 108.9 |
| 2008–2012 | 7.0             | 30.2             | 81.2  | 5.2             | 33.0             | 79.6  | 2.2             | 10.9             | 80.7  | 5.6             | 20.7             | 107.6 |

Secondary Medical Zone ID: 163

|           | Male            |                  |       |                 |                  |       | Female          |                  |       |                 |                  |       |
|-----------|-----------------|------------------|-------|-----------------|------------------|-------|-----------------|------------------|-------|-----------------|------------------|-------|
|           | Suicide         |                  |       | Suicide         |                  |       | Suicide         |                  |       | Suicide         |                  |       |
|           | Num<br>per year | Rate<br>/100,000 | × 100 | Num<br>per year | Rate<br>/100,000 | × 100 | Num<br>per year | Rate<br>/100,000 | × 100 | Num<br>per year | Rate<br>/100,000 | × 100 |
|           |                 |                  |       |                 |                  |       |                 |                  |       |                 |                  |       |
|           | Total (>10 y/o) |                  |       | 45–54           |                  |       | Total (>10 y/o) |                  |       | 45–54           |                  |       |
| 1983–1987 | 46.2            | 31.9             | 96.9  | 12.4            | 54.5             | 107.8 | 29.6            | 16.8             | 114.2 | 5.0             | 20.1             | 116.6 |
| 1988–1992 | 39.0            | 24.4             | 98.3  | 8.2             | 33.6             | 97.9  | 29.8            | 14.3             | 121.0 | 3.2             | 13.9             | 95.1  |
| 1993–1997 | 36.6            | 22.0             | 85.4  | 7.4             | 28.2             | 77.0  | 27.8            | 12.0             | 123.1 | 2.8             | 11.3             | 87.1  |
| 1998–2002 | 58.2            | 33.1             | 89.9  | 13.2            | 46.6             | 83.4  | 24.6            | 11.7             | 94.3  | 2.8             | 11.8             | 78.3  |
| 2003–2007 | 61.6            | 34.1             | 93.4  | 10.0            | 41.7             | 74.5  | 28.2            | 12.7             | 108.8 | 4.6             | 16.0             | 116.7 |
| 2008–2012 | 59.6            | 33.7             | 97.9  | 10.6            | 47.9             | 98.6  | 24.8            | 11.9             | 99.1  | 1.6             | 10.1             | 67.9  |
|           | 15–24           |                  |       | 55–64           |                  |       | 15–24           |                  |       | 55–64           |                  |       |
| 1983–1987 | 3.0             | 14.0             | 100.2 | 6.6             | 35.8             | 84.4  | 0.6             | 4.8              | 70.1  | 3.8             | 18.4             | 93.3  |
| 1988–1992 | 3.2             | 11.6             | 117.0 | 6.8             | 31.9             | 89.9  | 0.8             | 4.2              | 79.9  | 3.4             | 16.0             | 89.4  |
| 1993–1997 | 2.6             | 10.6             | 94.0  | 8.2             | 37.7             | 93.5  | 1.0             | 4.6              | 87.4  | 4.4             | 17.9             | 112.4 |
| 1998–2002 | 4.2             | 17.0             | 107.4 | 14.4            | 60.7             | 95.6  | 2.2             | 8.4              | 119.2 | 4.2             | 17.9             | 95.3  |
| 2003–2007 | 3.2             | 16.2             | 92.8  | 16.8            | 59.5             | 103.1 | 0.8             | 6.2              | 68.6  | 4.4             | 16.3             | 97.1  |
| 2008–2012 | 4.6             | 23.7             | 111.9 | 13.2            | 46.1             | 95.0  | 2.0             | 10.9             | 112.1 | 5.0             | 16.2             | 108.3 |
|           | 25–34           |                  |       | 65–74           |                  |       | 25–34           |                  |       | 65–74           |                  |       |
| 1983–1987 | 4.2             | 21.0             | 82.3  | 4.4             | 40.4             | 92.2  | 3.0             | 12.1             | 112.8 | 6.0             | 38.6             | 123.6 |
| 1988–1992 | 4.8             | 22.2             | 116.1 | 4.6             | 34.1             | 96.8  | 2.2             | 9.5              | 109.4 | 7.2             | 38.0             | 145.8 |
| 1993–1997 | 2.4             | 14.0             | 71.9  | 4.6             | 27.6             | 86.5  | 1.8             | 8.3              | 99.7  | 4.8             | 22.5             | 115.5 |
| 1998–2002 | 4.0             | 20.4             | 75.5  | 7.8             | 41.0             | 90.2  | 2.6             | 11.5             | 98.9  | 4.0             | 19.0             | 90.4  |
| 2003–2007 | 6.6             | 28.7             | 92.6  | 8.0             | 40.6             | 94.6  | 3.8             | 15.3             | 117.3 | 4.2             | 18.8             | 100.8 |
| 2008–2012 | 6.6             | 32.1             | 98.5  | 6.8             | 33.8             | 85.6  | 1.8             | 11.6             | 81.1  | 3.6             | 16.6             | 93.4  |
|           | 35–44           |                  |       | >74 y/o         |                  |       | 35–44           |                  |       | >74 y/o         |                  |       |
| 1983–1987 | 8.8             | 31.3             | 98.3  | 6.8             | 91.2             | 116.4 | 2.2             | 9.7              | 81.8  | 9.0             | 89.8             | 155.7 |
| 1988–1992 | 5.6             | 20.3             | 85.4  | 5.6             | 66.3             | 102.8 | 2.2             | 8.6              | 88.7  | 10.6            | 80.6             | 168.5 |
| 1993–1997 | 5.4             | 21.8             | 89.1  | 6.0             | 59.3             | 113.9 | 2.2             | 8.5              | 99.4  | 10.8            | 65.7             | 190.8 |
| 1998–2002 | 8.0             | 35.1             | 99.7  | 6.6             | 53.7             | 101.8 | 0.8             | 6.3              | 60.5  | 8.0             | 39.3             | 126.5 |
| 2003–2007 | 9.4             | 41.5             | 103.7 | 7.6             | 47.2             | 104.9 | 1.8             | 10.0             | 79.3  | 8.4             | 32.6             | 145.4 |
| 2008–2012 | 8.2             | 34.9             | 93.9  | 9.4             | 48.4             | 116.6 | 2.0             | 10.9             | 80.5  | 8.8             | 28.5             | 148.1 |

Secondary Medical Zone ID: 164

|           | Male            |          |       |          |          |       | Female          |          |       |          |          |       |
|-----------|-----------------|----------|-------|----------|----------|-------|-----------------|----------|-------|----------|----------|-------|
|           | Suicide         |          |       | Suicide  |          |       | Suicide         |          |       | Suicide  |          |       |
|           | Num             | Rate     | × 100 | Num      | Rate     | × 100 | Num             | Rate     | × 100 | Num      | Rate     | × 100 |
|           | per year        | /100,000 |       | per year | /100,000 |       | per year        | /100,000 |       | per year | /100,000 |       |
|           | Total (>10 y/o) |          |       | 45–54    |          |       | Total (>10 y/o) |          |       | 45–54    |          |       |
| 1983–1987 | 47.8            | 33.7     | 103.9 | 10.2     | 44.5     | 87.9  | 38.4            | 20.3     | 146.4 | 5.2      | 19.9     | 115.7 |
| 1988–1992 | 42.8            | 26.5     | 112.6 | 9.8      | 39.1     | 113.7 | 32.0            | 14.8     | 131.4 | 3.2      | 13.6     | 93.2  |
| 1993–1997 | 47.2            | 27.3     | 113.2 | 10.6     | 38.5     | 105.3 | 31.2            | 13.2     | 139.1 | 4.4      | 14.8     | 114.9 |
| 1998–2002 | 69.4            | 38.8     | 112.2 | 17.8     | 64.1     | 114.5 | 32.6            | 13.8     | 122.9 | 4.6      | 16.2     | 107.8 |
| 2003–2007 | 63.0            | 36.3     | 102.4 | 9.8      | 44.2     | 79.1  | 28.2            | 12.9     | 112.4 | 2.4      | 11.7     | 85.0  |
| 2008–2012 | 49.8            | 31.5     | 90.4  | 8.2      | 41.6     | 85.6  | 27.0            | 12.6     | 110.1 | 3.0      | 14.3     | 95.8  |
| -----     |                 |          |       |          |          |       |                 |          |       |          |          |       |
|           | 15–24           |          |       | 55–64    |          |       | 15–24           |          |       | 55–64    |          |       |
| 1983–1987 | 3.0             | 14.2     | 101.8 | 8.4      | 43.9     | 103.3 | 1.6             | 7.0      | 103.0 | 6.2      | 25.8     | 130.8 |
| 1988–1992 | 2.4             | 10.2     | 102.6 | 9.6      | 41.8     | 117.9 | 0.2             | 2.9      | 54.8  | 6.2      | 23.3     | 130.6 |
| 1993–1997 | 2.8             | 11.7     | 103.1 | 10.2     | 43.8     | 108.9 | 1.0             | 4.7      | 89.2  | 5.2      | 19.7     | 124.0 |
| 1998–2002 | 3.0             | 15.0     | 94.7  | 17.6     | 72.8     | 114.5 | 1.8             | 7.8      | 111.3 | 4.6      | 18.6     | 99.0  |
| 2003–2007 | 3.4             | 18.0     | 103.1 | 18.2     | 68.2     | 118.1 | 1.0             | 7.1      | 78.4  | 4.6      | 17.0     | 101.4 |
| 2008–2012 | 3.2             | 20.6     | 97.1  | 12.2     | 47.3     | 97.4  | 1.6             | 9.9      | 101.6 | 3.2      | 13.3     | 89.1  |
| -----     |                 |          |       |          |          |       |                 |          |       |          |          |       |
|           | 25–34           |          |       | 65–74    |          |       | 25–34           |          |       | 65–74    |          |       |
| 1983–1987 | 6.8             | 30.7     | 120.0 | 5.4      | 49.1     | 112.1 | 3.2             | 13.1     | 121.7 | 7.0      | 44.9     | 143.7 |
| 1988–1992 | 4.8             | 22.7     | 118.6 | 5.0      | 38.0     | 107.9 | 0.6             | 5.6      | 64.2  | 5.0      | 29.0     | 111.3 |
| 1993–1997 | 3.2             | 16.7     | 85.5  | 6.6      | 38.0     | 119.2 | 1.8             | 8.3      | 100.2 | 6.4      | 28.6     | 147.0 |
| 1998–2002 | 6.4             | 28.3     | 104.8 | 8.2      | 43.5     | 95.6  | 2.4             | 11.2     | 96.3  | 5.4      | 23.4     | 111.5 |
| 2003–2007 | 5.6             | 27.8     | 89.5  | 9.4      | 45.9     | 107.0 | 3.4             | 14.8     | 114.1 | 5.4      | 22.0     | 118.1 |
| 2008–2012 | 5.2             | 30.2     | 92.7  | 5.6      | 30.5     | 77.1  | 2.4             | 14.1     | 98.5  | 5.6      | 21.5     | 120.8 |
| -----     |                 |          |       |          |          |       |                 |          |       |          |          |       |
|           | 35–44           |          |       | >74 y/o  |          |       | 35–44           |          |       | >74 y/o  |          |       |
| 1983–1987 | 6.2             | 25.1     | 79.0  | 7.4      | 115.6    | 147.6 | 4.0             | 13.6     | 115.4 | 11.2     | 117.7    | 204.0 |
| 1988–1992 | 4.2             | 17.8     | 74.9  | 6.8      | 87.8     | 136.0 | 2.4             | 9.3      | 96.6  | 14.4     | 112.7    | 235.6 |
| 1993–1997 | 8.6             | 33.8     | 137.9 | 5.2      | 59.0     | 113.2 | 2.0             | 8.4      | 99.0  | 10.4     | 66.2     | 192.4 |
| 1998–2002 | 8.8             | 39.2     | 111.4 | 7.2      | 63.3     | 120.1 | 1.6             | 8.5      | 82.7  | 11.8     | 58.5     | 188.3 |
| 2003–2007 | 9.2             | 42.0     | 104.9 | 7.2      | 49.3     | 109.4 | 3.0             | 13.3     | 104.9 | 8.2      | 32.7     | 145.8 |
| 2008–2012 | 6.4             | 31.7     | 85.2  | 9.0      | 49.8     | 120.0 | 1.2             | 9.4      | 69.4  | 10.0     | 32.3     | 167.9 |

Secondary Medical Zone ID: 165

|           | Male            |          |       |          |          |       | Female          |          |       |          |          |       |
|-----------|-----------------|----------|-------|----------|----------|-------|-----------------|----------|-------|----------|----------|-------|
|           | Suicide         |          |       | Suicide  |          |       | Suicide         |          |       | Suicide  |          |       |
|           | Num             | Rate     | × 100 | Num      | Rate     | × 100 | Num             | Rate     | × 100 | Num      | Rate     | × 100 |
|           | per year        | /100,000 |       | per year | /100,000 |       | per year        | /100,000 |       | per year | /100,000 |       |
|           | Total (>10 y/o) |          |       | 45–54    |          |       | Total (>10 y/o) |          |       | 45–54    |          |       |
| 1983–1987 | 36.8            | 41.2     | 144.3 | 8.4      | 62.5     | 123.6 | 19.8            | 18.4     | 133.3 | 2.2      | 17.0     | 98.7  |
| 1988–1992 | 32.6            | 32.4     | 157.8 | 6.4      | 46.8     | 136.4 | 20.4            | 15.9     | 146.7 | 2.0      | 15.0     | 102.5 |
| 1993–1997 | 27.4            | 28.4     | 129.0 | 5.4      | 40.2     | 109.9 | 17.2            | 12.8     | 141.1 | 3.0      | 17.0     | 131.3 |
| 1998–2002 | 31.0            | 35.9     | 104.4 | 7.2      | 57.5     | 102.7 | 20.0            | 14.9     | 139.9 | 2.6      | 17.4     | 115.5 |
| 2003–2007 | 37.2            | 41.0     | 125.8 | 6.8      | 62.7     | 112.0 | 16.0            | 13.8     | 123.8 | 2.8      | 18.4     | 134.5 |
| 2008–2012 | 42.0            | 41.7     | 150.8 | 7.0      | 63.4     | 130.4 | 12.8            | 13.1     | 108.7 | 1.4      | 14.9     | 99.8  |
| -----     |                 |          |       |          |          |       |                 |          |       |          |          |       |
|           | 15–24           |          |       | 55–64    |          |       | 15–24           |          |       | 55–64    |          |       |
| 1983–1987 | 3.0             | 22.6     | 162.0 | 7.4      | 60.5     | 142.3 | 1.4             | 9.4      | 137.3 | 4.0      | 26.8     | 135.9 |
| 1988–1992 | 0.6             | 8.7      | 88.0  | 6.4      | 47.5     | 133.8 | 0.0             | 3.7      | 69.3  | 3.2      | 21.4     | 119.8 |
| 1993–1997 | 2.0             | 14.4     | 127.2 | 6.4      | 49.0     | 121.8 | 0.6             | 5.6      | 108.0 | 3.0      | 19.7     | 124.1 |
| 1998–2002 | 1.8             | 17.9     | 113.3 | 9.2      | 75.3     | 118.5 | 0.8             | 7.9      | 112.5 | 4.6      | 26.4     | 140.0 |
| 2003–2007 | 1.6             | 19.1     | 109.3 | 8.8      | 68.5     | 118.6 | 0.6             | 9.1      | 100.7 | 3.0      | 19.3     | 115.5 |
| 2008–2012 | 1.6             | 23.3     | 109.8 | 8.6      | 62.0     | 127.7 | 0.6             | 10.0     | 103.2 | 1.8      | 14.8     | 99.3  |
| -----     |                 |          |       |          |          |       |                 |          |       |          |          |       |
|           | 25–34           |          |       | 65–74    |          |       | 25–34           |          |       | 65–74    |          |       |
| 1983–1987 | 3.0             | 28.1     | 110.1 | 5.0      | 66.0     | 150.8 | 1.8             | 13.5     | 125.1 | 3.0      | 34.5     | 110.3 |
| 1988–1992 | 2.0             | 20.6     | 107.8 | 6.4      | 66.5     | 188.9 | 1.0             | 9.3      | 107.0 | 4.4      | 38.8     | 148.8 |
| 1993–1997 | 1.6             | 18.5     | 94.5  | 4.4      | 42.7     | 133.9 | 0.4             | 7.0      | 83.9  | 3.4      | 26.4     | 135.5 |
| 1998–2002 | 1.8             | 22.9     | 84.9  | 5.2      | 48.5     | 106.6 | 0.6             | 9.8      | 84.7  | 4.0      | 28.2     | 134.3 |
| 2003–2007 | 3.2             | 32.2     | 103.8 | 7.0      | 58.7     | 136.9 | 1.2             | 13.1     | 100.4 | 5.2      | 31.2     | 167.5 |
| 2008–2012 | 3.2             | 36.1     | 110.8 | 8.0      | 62.4     | 158.0 | 0.6             | 12.5     | 87.2  | 3.0      | 21.1     | 118.8 |
| -----     |                 |          |       |          |          |       |                 |          |       |          |          |       |
|           | 35–44           |          |       | >74 y/o  |          |       | 35–44           |          |       | >74 y/o  |          |       |
| 1983–1987 | 5.4             | 38.3     | 120.2 | 4.6      | 108.6    | 138.6 | 2.0             | 13.1     | 111.0 | 5.2      | 85.2     | 147.7 |
| 1988–1992 | 4.0             | 29.0     | 122.2 | 6.8      | 123.0    | 190.6 | 2.6             | 13.7     | 142.0 | 7.2      | 88.6     | 185.2 |
| 1993–1997 | 2.4             | 23.6     | 96.1  | 5.0      | 83.6     | 160.5 | 0.8             | 8.1      | 95.8  | 6.0      | 61.4     | 178.4 |
| 1998–2002 | 1.6             | 23.9     | 67.9  | 4.2      | 63.0     | 119.5 | 1.2             | 11.1     | 106.9 | 6.2      | 51.2     | 165.0 |
| 2003–2007 | 4.4             | 43.8     | 109.3 | 5.4      | 60.7     | 134.9 | 0.2             | 9.0      | 71.5  | 3.0      | 22.7     | 101.0 |
| 2008–2012 | 4.0             | 38.9     | 104.5 | 9.6      | 80.3     | 193.6 | 1.2             | 13.3     | 97.8  | 4.2      | 24.9     | 129.5 |

Secondary Medical Zone ID: 166

|                 | Male            |                  |       |                 |                  |       | Female          |                  |       |                 |                  |       |
|-----------------|-----------------|------------------|-------|-----------------|------------------|-------|-----------------|------------------|-------|-----------------|------------------|-------|
|                 | Suicide         |                  |       | Suicide         |                  |       | Suicide         |                  |       | Suicide         |                  |       |
|                 | Num<br>per year | Rate<br>/100,000 | × 100 | Num<br>per year | Rate<br>/100,000 | × 100 | Num<br>per year | Rate<br>/100,000 | × 100 | Num<br>per year | Rate<br>/100,000 | × 100 |
|                 |                 |                  |       |                 |                  |       |                 |                  |       |                 |                  |       |
| Total (>10 y/o) | 45–54           | Total (>10 y/o)  | 45–54 |                 |                  |       |                 |                  |       |                 |                  |       |
| 1983–1987       | 15.2            | 35.1             | 112.7 | 2.8             | 45.9             | 90.8  | 6.2             | 14.4             | 87.5  | 0.6             | 14.5             | 84.4  |
| 1988–1992       | 12.4            | 26.3             | 113.2 | 3.2             | 41.2             | 119.9 | 4.6             | 11.3             | 77.5  | 0.6             | 13.0             | 89.3  |
| 1993–1997       | 11.2            | 25.7             | 101.7 | 1.8             | 31.6             | 86.4  | 6.2             | 11.1             | 101.2 | 1.6             | 15.4             | 119.1 |
| 1998–2002       | 17.0            | 37.5             | 107.6 | 4.0             | 58.2             | 104.0 | 7.0             | 12.7             | 101.5 | 1.2             | 15.8             | 104.8 |
| 2003–2007       | 19.2            | 40.3             | 124.5 | 4.2             | 69.9             | 125.0 | 8.8             | 14.0             | 122.9 | 1.4             | 16.6             | 121.2 |
| 2008–2012       | 19.0            | 38.2             | 132.0 | 3.4             | 59.9             | 123.3 | 7.8             | 13.8             | 117.0 | 0.8             | 15.9             | 106.6 |
|                 | 15–24           |                  |       | 55–64           |                  |       | 15–24           |                  |       | 55–64           |                  |       |
| 1983–1987       | 0.8             | 15.6             | 111.8 | 1.2             | 32.0             | 75.3  | 0.4             | 7.2              | 106.1 | 0.2             | 13.5             | 68.3  |
| 1988–1992       | 1.0             | 12.2             | 123.4 | 1.6             | 29.9             | 84.2  | 0.0             | 4.4              | 83.0  | 0.8             | 15.7             | 87.8  |
| 1993–1997       | 0.4             | 11.2             | 98.8  | 1.8             | 34.4             | 85.5  | 0.0             | 4.4              | 84.6  | 0.8             | 14.4             | 90.5  |
| 1998–2002       | 0.4             | 15.5             | 97.9  | 3.2             | 55.8             | 87.9  | 0.2             | 7.0              | 99.1  | 0.8             | 16.6             | 88.4  |
| 2003–2007       | 0.2             | 16.2             | 93.0  | 4.8             | 63.8             | 110.4 | 0.2             | 8.9              | 98.9  | 1.4             | 17.4             | 103.7 |
| 2008–2012       | 0.2             | 19.6             | 92.6  | 5.6             | 63.3             | 130.2 | 0.2             | 9.7              | 100.5 | 2.0             | 18.4             | 123.2 |
|                 | 25–34           |                  |       | 65–74           |                  |       | 25–34           |                  |       | 65–74           |                  |       |
| 1983–1987       | 2.2             | 32.6             | 127.5 | 1.8             | 47.6             | 108.8 | 1.0             | 13.0             | 120.5 | 1.2             | 28.1             | 90.0  |
| 1988–1992       | 0.8             | 19.0             | 99.2  | 2.2             | 43.4             | 123.2 | 0.2             | 7.9              | 91.1  | 0.8             | 20.0             | 76.5  |
| 1993–1997       | 1.6             | 24.8             | 127.2 | 1.8             | 33.6             | 105.4 | 0.8             | 10.2             | 122.8 | 1.4             | 20.8             | 106.5 |
| 1998–2002       | 2.2             | 33.7             | 124.7 | 3.0             | 48.7             | 107.1 | 0.4             | 11.3             | 97.2  | 1.8             | 23.6             | 112.4 |
| 2003–2007       | 2.0             | 37.7             | 121.5 | 3.4             | 50.8             | 118.4 | 1.2             | 16.6             | 127.6 | 2.8             | 27.3             | 146.7 |
| 2008–2012       | 1.0             | 33.4             | 102.7 | 4.4             | 54.3             | 137.5 | 0.8             | 16.4             | 114.7 | 1.2             | 17.9             | 100.3 |
|                 | 35–44           |                  |       | >74 y/o         |                  |       | 35–44           |                  |       | >74 y/o         |                  |       |
| 1983–1987       | 4.4             | 46.1             | 144.9 | 1.6             | 77.1             | 98.5  | 1.0             | 12.3             | 103.8 | 1.8             | 55.1             | 95.5  |
| 1988–1992       | 2.4             | 29.0             | 122.6 | 1.2             | 55.0             | 85.3  | 0.2             | 8.1              | 83.8  | 2.0             | 47.1             | 98.4  |
| 1993–1997       | 2.0             | 30.1             | 122.8 | 1.8             | 57.3             | 110.1 | 0.8             | 10.0             | 118.0 | 0.8             | 21.4             | 62.3  |
| 1998–2002       | 2.4             | 43.1             | 122.4 | 1.8             | 52.0             | 98.7  | 0.8             | 12.0             | 116.3 | 1.8             | 29.4             | 94.7  |
| 2003–2007       | 1.6             | 39.3             | 98.0  | 3.0             | 56.9             | 126.5 | 0.2             | 11.2             | 89.1  | 1.6             | 21.6             | 96.4  |
| 2008–2012       | 2.0             | 39.8             | 107.1 | 2.4             | 44.3             | 106.9 | 0.4             | 13.0             | 95.6  | 2.4             | 24.4             | 127.1 |

Secondary Medical Zone ID: 167

|           | Male            |          |       |          |          |       | Female          |          |       |          |          |       |
|-----------|-----------------|----------|-------|----------|----------|-------|-----------------|----------|-------|----------|----------|-------|
|           | Suicide         |          |       | Suicide  |          |       | Suicide         |          |       | Suicide  |          |       |
|           | Num             | Rate     | × 100 | Num      | Rate     | × 100 | Num             | Rate     | × 100 | Num      | Rate     | × 100 |
|           | per year        | /100,000 |       | per year | /100,000 |       | per year        | /100,000 |       | per year | /100,000 |       |
|           | Total (>10 y/o) |          |       | 45–54    |          |       | Total (>10 y/o) |          |       | 45–54    |          |       |
| 1983–1987 | 19.2            | 34.8     | 115.6 | 5.8      | 61.4     | 121.5 | 10.2            | 15.5     | 104.1 | 1.6      | 16.8     | 97.4  |
| 1988–1992 | 16.4            | 27.2     | 119.7 | 4.0      | 40.6     | 118.1 | 10.2            | 13.4     | 107.8 | 1.0      | 12.9     | 88.0  |
| 1993–1997 | 16.6            | 26.7     | 114.2 | 4.2      | 41.1     | 112.4 | 8.4             | 11.0     | 101.7 | 1.6      | 13.7     | 105.8 |
| 1998–2002 | 26.2            | 39.9     | 123.3 | 5.2      | 60.2     | 107.5 | 14.2            | 14.7     | 131.6 | 3.0      | 20.7     | 137.7 |
| 2003–2007 | 22.6            | 40.0     | 111.6 | 5.4      | 72.1     | 128.9 | 8.4             | 12.8     | 97.3  | 1.2      | 14.7     | 107.1 |
| 2008–2012 | 22.4            | 37.0     | 117.6 | 4.2      | 58.7     | 120.8 | 11.2            | 13.9     | 116.3 | 1.2      | 16.3     | 109.2 |
| -----     |                 |          |       |          |          |       |                 |          |       |          |          |       |
|           | 15–24           |          |       | 55–64    |          |       | 15–24           |          |       | 55–64    |          |       |
| 1983–1987 | 0.6             | 12.0     | 85.7  | 3.8      | 51.2     | 120.5 | 0.2             | 5.7      | 83.4  | 1.6      | 19.3     | 97.8  |
| 1988–1992 | 0.8             | 10.3     | 103.7 | 3.6      | 41.6     | 117.0 | 0.6             | 5.9      | 111.8 | 1.4      | 16.6     | 93.2  |
| 1993–1997 | 0.8             | 11.7     | 103.1 | 4.2      | 45.5     | 113.1 | 1.0             | 7.4      | 142.2 | 2.4      | 19.4     | 122.3 |
| 1998–2002 | 0.8             | 16.1     | 101.9 | 9.6      | 90.7     | 142.7 | 0.4             | 7.1      | 101.5 | 2.8      | 21.5     | 114.2 |
| 2003–2007 | 1.2             | 20.2     | 115.7 | 5.6      | 58.4     | 101.1 | 0.2             | 8.1      | 89.6  | 1.6      | 15.7     | 93.8  |
| 2008–2012 | 0.8             | 21.6     | 101.9 | 4.6      | 50.6     | 104.1 | 0.4             | 9.9      | 102.3 | 2.2      | 17.0     | 114.3 |
| -----     |                 |          |       |          |          |       |                 |          |       |          |          |       |
|           | 25–34           |          |       | 65–74    |          |       | 25–34           |          |       | 65–74    |          |       |
| 1983–1987 | 1.8             | 26.4     | 103.4 | 1.4      | 40.6     | 92.8  | 1.4             | 13.8     | 128.1 | 1.4      | 27.8     | 88.9  |
| 1988–1992 | 1.4             | 20.8     | 108.9 | 2.0      | 39.4     | 111.7 | 1.0             | 10.6     | 121.7 | 2.4      | 30.7     | 117.6 |
| 1993–1997 | 1.6             | 21.6     | 110.8 | 2.2      | 35.0     | 109.6 | 0.6             | 8.5      | 102.3 | 1.2      | 16.9     | 86.9  |
| 1998–2002 | 1.8             | 27.3     | 101.2 | 3.8      | 49.8     | 109.6 | 1.4             | 13.9     | 120.0 | 2.2      | 22.6     | 107.4 |
| 2003–2007 | 3.2             | 40.8     | 131.7 | 3.2      | 41.0     | 95.6  | 1.0             | 14.1     | 108.6 | 2.2      | 20.1     | 107.9 |
| 2008–2012 | 1.4             | 32.9     | 101.1 | 4.6      | 44.9     | 113.6 | 0.8             | 15.2     | 106.3 | 3.2      | 22.1     | 124.4 |
| -----     |                 |          |       |          |          |       |                 |          |       |          |          |       |
|           | 35–44           |          |       | >74 y/o  |          |       | 35–44           |          |       | >74 y/o  |          |       |
| 1983–1987 | 4.2             | 39.0     | 122.6 | 1.2      | 65.1     | 83.1  | 1.6             | 12.9     | 108.9 | 2.2      | 64.0     | 110.8 |
| 1988–1992 | 2.2             | 25.3     | 106.6 | 2.4      | 74.5     | 115.6 | 2.4             | 14.6     | 151.0 | 1.4      | 34.7     | 72.5  |
| 1993–1997 | 1.8             | 25.8     | 105.1 | 1.8      | 52.8     | 101.5 | 0.4             | 7.7      | 91.0  | 1.2      | 23.9     | 69.5  |
| 1998–2002 | 2.6             | 39.2     | 111.2 | 2.2      | 53.6     | 101.7 | 1.0             | 11.9     | 115.5 | 3.4      | 40.6     | 130.9 |
| 2003–2007 | 2.4             | 39.6     | 98.7  | 1.6      | 36.6     | 81.2  | 1.2             | 14.2     | 112.7 | 1.0      | 14.1     | 63.0  |
| 2008–2012 | 3.0             | 40.3     | 108.4 | 3.4      | 47.5     | 114.6 | 0.8             | 13.2     | 97.3  | 2.6      | 21.3     | 111.0 |



Secondary Medical Zone ID: 168

|           | Male            |                  |       |                 |                  |       | Female          |                  |       |                 |                  |       |
|-----------|-----------------|------------------|-------|-----------------|------------------|-------|-----------------|------------------|-------|-----------------|------------------|-------|
|           | Suicide         |                  |       | Suicide         |                  |       | Suicide         |                  |       | Suicide         |                  |       |
|           | Num<br>per year | Rate<br>/100,000 | × 100 | Num<br>per year | Rate<br>/100,000 | × 100 | Num<br>per year | Rate<br>/100,000 | × 100 | Num<br>per year | Rate<br>/100,000 | × 100 |
|           |                 |                  |       |                 |                  |       |                 |                  |       |                 |                  |       |
|           | Total (>10 y/o) |                  |       | 45–54           |                  |       | Total (>10 y/o) |                  |       | 45–54           |                  |       |
| 1983–1987 | 72.4            | 29.3             | 88.7  | 19.2            | 45.4             | 89.7  | 35.0            | 13.5             | 86.3  | 7.4             | 17.5             | 101.7 |
| 1988–1992 | 62.0            | 22.5             | 90.0  | 15.2            | 32.0             | 93.2  | 29.8            | 10.4             | 77.6  | 4.8             | 11.5             | 78.8  |
| 1993–1997 | 67.0            | 22.3             | 87.8  | 17.2            | 33.0             | 90.3  | 29.4            | 9.2              | 81.9  | 5.8             | 11.6             | 90.2  |
| 1998–2002 | 106.4           | 33.3             | 92.1  | 25.0            | 49.0             | 87.6  | 37.4            | 10.9             | 85.1  | 6.4             | 13.3             | 88.3  |
| 2003–2007 | 113.8           | 35.3             | 96.0  | 27.4            | 59.9             | 107.1 | 39.4            | 11.3             | 90.8  | 6.2             | 14.0             | 102.0 |
| 2008–2012 | 114.4           | 35.1             | 103.0 | 22.2            | 51.9             | 106.7 | 39.4            | 11.7             | 91.0  | 4.8             | 12.8             | 86.0  |
|           | 15–24           |                  |       | 55–64           |                  |       | 15–24           |                  |       | 55–64           |                  |       |
| 1983–1987 | 4.0             | 10.5             | 75.1  | 11.0            | 38.4             | 90.4  | 2.8             | 6.8              | 99.9  | 4.6             | 15.8             | 80.2  |
| 1988–1992 | 6.0             | 11.8             | 118.7 | 11.2            | 31.3             | 88.1  | 1.4             | 3.8              | 71.7  | 5.4             | 15.3             | 85.6  |
| 1993–1997 | 6.2             | 12.8             | 113.3 | 15.6            | 38.7             | 96.0  | 1.2             | 3.6              | 68.4  | 6.8             | 16.2             | 102.1 |
| 1998–2002 | 3.8             | 11.5             | 72.7  | 28.2            | 62.9             | 98.9  | 1.8             | 5.7              | 81.5  | 7.8             | 17.5             | 92.8  |
| 2003–2007 | 4.6             | 14.8             | 84.6  | 26.0            | 52.8             | 91.6  | 2.8             | 9.0              | 100.2 | 8.8             | 17.2             | 102.9 |
| 2008–2012 | 6.2             | 20.6             | 97.0  | 24.0            | 48.6             | 100.0 | 1.6             | 7.0              | 72.1  | 6.0             | 12.8             | 86.1  |
|           | 25–34           |                  |       | 65–74           |                  |       | 25–34           |                  |       | 65–74           |                  |       |
| 1983–1987 | 8.2             | 19.3             | 75.4  | 6.2             | 41.3             | 94.2  | 4.8             | 10.8             | 100.7 | 5.4             | 27.3             | 87.5  |
| 1988–1992 | 7.2             | 16.4             | 85.8  | 5.0             | 28.0             | 79.6  | 2.4             | 6.6              | 76.4  | 4.8             | 20.5             | 78.5  |
| 1993–1997 | 7.8             | 16.9             | 86.5  | 6.4             | 26.3             | 82.6  | 2.2             | 6.1              | 73.0  | 4.0             | 14.3             | 73.5  |
| 1998–2002 | 12.2            | 24.5             | 90.9  | 14.8            | 47.1             | 103.7 | 3.8             | 9.2              | 79.3  | 5.0             | 15.5             | 73.8  |
| 2003–2007 | 12.4            | 26.5             | 85.5  | 16.8            | 47.0             | 109.6 | 3.8             | 9.8              | 75.7  | 7.6             | 19.1             | 102.7 |
| 2008–2012 | 14.2            | 33.9             | 103.9 | 18.8            | 46.1             | 116.7 | 4.8             | 13.5             | 94.2  | 6.6             | 15.9             | 89.3  |
|           | 35–44           |                  |       | >74 y/o         |                  |       | 35–44           |                  |       | >74 y/o         |                  |       |
| 1983–1987 | 17.8            | 32.6             | 102.6 | 6.0             | 73.3             | 93.6  | 4.4             | 9.2              | 77.9  | 5.6             | 45.2             | 78.4  |
| 1988–1992 | 11.8            | 22.2             | 93.6  | 5.6             | 55.3             | 85.7  | 5.4             | 10.2             | 105.7 | 5.4             | 32.7             | 68.3  |
| 1993–1997 | 9.0             | 19.6             | 80.2  | 4.8             | 40.2             | 77.2  | 3.0             | 7.1              | 84.1  | 5.8             | 26.9             | 78.1  |
| 1998–2002 | 16.2            | 36.0             | 102.3 | 5.8             | 38.9             | 73.7  | 4.0             | 9.8              | 94.4  | 8.6             | 30.5             | 98.1  |
| 2003–2007 | 19.6            | 41.5             | 103.6 | 7.0             | 34.2             | 76.1  | 2.6             | 7.9              | 62.9  | 7.6             | 21.1             | 94.2  |
| 2008–2012 | 17.8            | 35.4             | 95.2  | 11.0            | 40.3             | 97.2  | 6.2             | 13.3             | 97.9  | 9.4             | 21.1             | 109.6 |

Secondary Medical Zone ID: 169

|                 | Male            |                  |       |                 |                  |       | Female          |                  |       |                 |                  |       |
|-----------------|-----------------|------------------|-------|-----------------|------------------|-------|-----------------|------------------|-------|-----------------|------------------|-------|
|                 | Suicide         |                  |       | Suicide         |                  |       | Suicide         |                  |       | Suicide         |                  |       |
|                 | Num<br>per year | Rate<br>/100,000 | × 100 | Num<br>per year | Rate<br>/100,000 | × 100 | Num<br>per year | Rate<br>/100,000 | × 100 | Num<br>per year | Rate<br>/100,000 | × 100 |
|                 |                 |                  |       |                 |                  |       |                 |                  |       |                 |                  |       |
| Total (>10 y/o) | 45–54           | Total (>10 y/o)  | 45–54 |                 |                  |       |                 |                  |       |                 |                  |       |
| 1983–1987       | 50.2            | 34.7             | 109.8 | 14.6            | 58.8             | 116.2 | 19.8            | 14.1             | 89.1  | 3.2             | 15.1             | 87.6  |
| 1988–1992       | 35.4            | 23.3             | 93.9  | 9.2             | 33.9             | 98.8  | 15.2            | 10.4             | 74.2  | 2.6             | 11.9             | 81.6  |
| 1993–1997       | 39.8            | 23.7             | 94.2  | 9.0             | 31.5             | 86.2  | 17.8            | 9.7              | 89.4  | 3.4             | 12.1             | 93.8  |
| 1998–2002       | 65.8            | 36.0             | 101.3 | 16.6            | 55.3             | 98.9  | 21.6            | 11.4             | 88.7  | 2.4             | 11.0             | 72.9  |
| 2003–2007       | 69.4            | 37.6             | 103.6 | 15.0            | 56.1             | 100.3 | 24.0            | 12.3             | 97.5  | 3.6             | 13.8             | 100.7 |
| 2008–2012       | 76.6            | 39.2             | 120.1 | 15.4            | 59.6             | 122.7 | 21.8            | 11.4             | 90.0  | 2.2             | 11.5             | 76.8  |
|                 | 15–24           |                  |       | 55–64           |                  |       | 15–24           |                  |       | 55–64           |                  |       |
| 1983–1987       | 2.6             | 12.3             | 88.2  | 6.8             | 42.5             | 100.1 | 1.2             | 5.9              | 86.4  | 3.0             | 18.1             | 91.8  |
| 1988–1992       | 1.6             | 7.9              | 79.9  | 7.8             | 38.2             | 107.5 | 1.2             | 5.0              | 94.0  | 3.6             | 17.6             | 98.6  |
| 1993–1997       | 2.0             | 9.6              | 84.5  | 10.6            | 45.0             | 111.7 | 0.8             | 4.2              | 80.6  | 3.0             | 14.0             | 88.4  |
| 1998–2002       | 3.6             | 16.5             | 104.4 | 14.8            | 59.0             | 92.8  | 1.4             | 6.9              | 98.7  | 5.4             | 20.1             | 107.0 |
| 2003–2007       | 3.6             | 18.5             | 106.0 | 17.2            | 60.5             | 104.7 | 1.2             | 7.7              | 85.6  | 4.6             | 16.3             | 97.5  |
| 2008–2012       | 3.4             | 20.8             | 98.1  | 18.6            | 60.9             | 125.3 | 1.0             | 7.7              | 79.7  | 6.2             | 18.7             | 125.7 |
|                 | 25–34           |                  |       | 65–74           |                  |       | 25–34           |                  |       | 65–74           |                  |       |
| 1983–1987       | 5.4             | 22.2             | 87.0  | 5.4             | 57.9             | 132.3 | 1.6             | 8.0              | 74.6  | 4.2             | 34.7             | 111.0 |
| 1988–1992       | 3.2             | 14.6             | 76.6  | 3.2             | 32.6             | 92.5  | 0.6             | 5.2              | 59.8  | 2.0             | 17.7             | 68.0  |
| 1993–1997       | 4.8             | 18.7             | 95.6  | 5.0             | 35.5             | 111.4 | 0.6             | 5.0              | 60.4  | 4.6             | 25.2             | 129.5 |
| 1998–2002       | 11.0            | 35.4             | 131.2 | 8.8             | 50.8             | 111.7 | 1.4             | 8.0              | 69.1  | 3.0             | 17.3             | 82.1  |
| 2003–2007       | 8.4             | 31.2             | 100.6 | 8.6             | 44.2             | 103.1 | 3.8             | 14.4             | 111.0 | 5.2             | 22.1             | 118.6 |
| 2008–2012       | 10.0            | 39.8             | 122.1 | 10.6            | 45.5             | 115.2 | 2.0             | 11.8             | 82.1  | 4.8             | 19.0             | 106.9 |
|                 | 35–44           |                  |       | >74 y/o         |                  |       | 35–44           |                  |       | >74 y/o         |                  |       |
| 1983–1987       | 11.8            | 37.4             | 117.4 | 3.0             | 73.1             | 93.4  | 2.8             | 10.3             | 87.4  | 3.6             | 55.1             | 95.5  |
| 1988–1992       | 6.0             | 20.6             | 87.0  | 4.0             | 70.8             | 109.8 | 1.6             | 7.3              | 75.2  | 3.6             | 40.2             | 84.0  |
| 1993–1997       | 5.6             | 21.4             | 87.3  | 2.8             | 45.6             | 87.5  | 1.6             | 7.1              | 83.0  | 3.8             | 32.4             | 94.0  |
| 1998–2002       | 7.0             | 29.1             | 82.6  | 4.0             | 49.2             | 93.3  | 2.4             | 10.0             | 96.3  | 5.4             | 35.0             | 112.6 |
| 2003–2007       | 11.8            | 43.4             | 108.3 | 4.6             | 41.7             | 92.6  | 2.2             | 10.4             | 82.0  | 3.4             | 18.4             | 81.9  |
| 2008–2012       | 11.6            | 39.0             | 104.7 | 6.8             | 45.8             | 110.5 | 2.2             | 10.5             | 77.2  | 3.4             | 15.3             | 79.7  |

Secondary Medical Zone ID: 170

|                 | Male            |                  |       |                 |                  |       | Female          |                  |       |                 |                  |       |
|-----------------|-----------------|------------------|-------|-----------------|------------------|-------|-----------------|------------------|-------|-----------------|------------------|-------|
|                 | Suicide         |                  |       | Suicide         |                  |       | Suicide         |                  |       | Suicide         |                  |       |
|                 | Num<br>per year | Rate<br>/100,000 | × 100 | Num<br>per year | Rate<br>/100,000 | × 100 | Num<br>per year | Rate<br>/100,000 | × 100 | Num<br>per year | Rate<br>/100,000 | × 100 |
|                 |                 |                  |       |                 |                  |       |                 |                  |       |                 |                  |       |
| Total (>10 y/o) | 45–54           | Total (>10 y/o)  | 45–54 |                 |                  |       |                 |                  |       |                 |                  |       |
| 1983–1987       | 80.8            | 28.3             | 84.7  | 20.2            | 40.5             | 80.0  | 38.0            | 12.4             | 78.0  | 7.2             | 14.9             | 86.7  |
| 1988–1992       | 68.2            | 22.0             | 87.7  | 16.2            | 30.0             | 87.5  | 39.4            | 11.2             | 85.6  | 7.6             | 14.1             | 96.7  |
| 1993–1997       | 80.6            | 23.7             | 94.8  | 21.2            | 36.2             | 98.9  | 34.4            | 9.3              | 82.5  | 5.8             | 10.6             | 82.4  |
| 1998–2002       | 113.2           | 32.2             | 90.1  | 29.6            | 53.7             | 96.0  | 38.0            | 10.2             | 77.0  | 8.2             | 14.9             | 98.9  |
| 2003–2007       | 111.4           | 33.6             | 88.3  | 22.8            | 48.6             | 86.9  | 35.2            | 10.4             | 74.6  | 3.8             | 9.6              | 70.1  |
| 2008–2012       | 104.8           | 31.8             | 90.5  | 18.6            | 43.2             | 88.9  | 44.2            | 12.3             | 92.0  | 6.0             | 14.1             | 94.2  |
|                 | 15–24           |                  |       | 55–64           |                  |       | 15–24           |                  |       | 55–64           |                  |       |
| 1983–1987       | 6.4             | 13.4             | 95.9  | 13.2            | 38.7             | 91.1  | 2.6             | 5.6              | 81.7  | 6.4             | 17.2             | 87.4  |
| 1988–1992       | 4.6             | 8.9              | 89.9  | 14.8            | 34.6             | 97.5  | 2.6             | 4.9              | 93.0  | 8.0             | 18.0             | 100.9 |
| 1993–1997       | 4.6             | 9.6              | 84.5  | 20.0            | 42.5             | 105.6 | 2.4             | 4.9              | 93.0  | 6.6             | 14.2             | 89.3  |
| 1998–2002       | 6.4             | 15.1             | 95.3  | 30.6            | 61.3             | 96.4  | 2.6             | 6.4              | 91.5  | 9.0             | 17.7             | 94.1  |
| 2003–2007       | 7.0             | 18.6             | 106.8 | 29.0            | 54.0             | 93.6  | 3.8             | 10.1             | 112.6 | 7.8             | 14.6             | 87.4  |
| 2008–2012       | 6.4             | 20.3             | 95.7  | 20.4            | 40.6             | 83.5  | 3.2             | 10.1             | 103.7 | 7.8             | 14.6             | 97.9  |
|                 | 25–34           |                  |       | 65–74           |                  |       | 25–34           |                  |       | 65–74           |                  |       |
| 1983–1987       | 11.4            | 23.6             | 92.2  | 5.2             | 31.3             | 71.6  | 4.4             | 9.2              | 85.2  | 5.2             | 22.2             | 70.9  |
| 1988–1992       | 7.0             | 15.7             | 81.9  | 9.0             | 39.8             | 113.1 | 3.2             | 7.3              | 84.3  | 5.4             | 19.0             | 73.0  |
| 1993–1997       | 9.2             | 19.0             | 97.1  | 7.6             | 26.8             | 84.1  | 4.0             | 8.3              | 99.2  | 6.0             | 17.2             | 88.3  |
| 1998–2002       | 9.4             | 20.0             | 74.1  | 15.2            | 42.8             | 94.1  | 3.4             | 8.1              | 69.8  | 4.0             | 11.9             | 56.4  |
| 2003–2007       | 14.8            | 31.1             | 100.4 | 12.0            | 31.8             | 74.1  | 5.0             | 11.3             | 86.7  | 5.8             | 14.1             | 75.7  |
| 2008–2012       | 13.2            | 32.8             | 100.6 | 17.6            | 40.1             | 101.6 | 5.4             | 14.0             | 97.5  | 6.6             | 14.6             | 81.9  |
|                 | 35–44           |                  |       | >74 y/o         |                  |       | 35–44           |                  |       | >74 y/o         |                  |       |
| 1983–1987       | 17.2            | 28.1             | 88.4  | 7.0             | 69.3             | 88.4  | 6.4             | 10.6             | 89.7  | 5.6             | 37.5             | 65.0  |
| 1988–1992       | 9.4             | 17.2             | 72.6  | 7.2             | 57.4             | 88.9  | 4.8             | 8.7              | 89.7  | 7.6             | 36.7             | 76.6  |
| 1993–1997       | 9.8             | 20.4             | 83.0  | 8.2             | 54.4             | 104.4 | 3.4             | 7.3              | 86.2  | 6.2             | 23.9             | 69.4  |
| 1998–2002       | 12.2            | 27.4             | 77.9  | 9.6             | 51.7             | 98.0  | 2.8             | 7.3              | 70.4  | 8.0             | 24.2             | 77.9  |
| 2003–2007       | 19.0            | 39.5             | 98.5  | 6.6             | 28.7             | 63.6  | 4.0             | 9.6              | 76.3  | 5.0             | 12.7             | 56.5  |
| 2008–2012       | 17.4            | 34.3             | 92.1  | 11.2            | 36.3             | 87.4  | 7.0             | 13.8             | 102.0 | 8.2             | 16.3             | 84.9  |

Secondary Medical Zone ID: 171

|                 | Male            |                  |       |                 |                  |       | Female          |                  |       |                 |                  |       |
|-----------------|-----------------|------------------|-------|-----------------|------------------|-------|-----------------|------------------|-------|-----------------|------------------|-------|
|                 | Suicide         |                  |       | Suicide         |                  |       | Suicide         |                  |       | Suicide         |                  |       |
|                 | Num<br>per year | Rate<br>/100,000 | × 100 | Num<br>per year | Rate<br>/100,000 | × 100 | Num<br>per year | Rate<br>/100,000 | × 100 | Num<br>per year | Rate<br>/100,000 | × 100 |
|                 |                 |                  |       |                 |                  |       |                 |                  |       |                 |                  |       |
| Total (>10 y/o) | 45–54           | Total (>10 y/o)  | 45–54 |                 |                  |       |                 |                  |       |                 |                  |       |
| 1983–1987       | 49.4            | 29.0             | 85.4  | 11.2            | 39.2             | 77.6  | 26.0            | 13.5             | 85.2  | 5.0             | 17.2             | 99.8  |
| 1988–1992       | 43.8            | 22.7             | 90.8  | 7.8             | 25.8             | 75.0  | 25.2            | 11.3             | 87.0  | 3.6             | 12.6             | 86.3  |
| 1993–1997       | 46.6            | 22.6             | 87.7  | 10.6            | 30.6             | 83.7  | 23.6            | 9.6              | 88.8  | 3.0             | 9.9              | 76.9  |
| 1998–2002       | 75.8            | 33.7             | 93.6  | 17.2            | 48.7             | 87.0  | 25.0            | 10.5             | 79.8  | 4.6             | 13.5             | 89.4  |
| 2003–2007       | 79.6            | 35.5             | 96.4  | 15.6            | 49.6             | 88.7  | 24.6            | 10.7             | 81.0  | 3.4             | 11.7             | 85.4  |
| 2008–2012       | 71.2            | 32.8             | 93.2  | 12.2            | 43.0             | 88.5  | 24.6            | 10.8             | 82.3  | 2.0             | 9.8              | 65.5  |
|                 | 15–24           |                  |       | 55–64           |                  |       | 15–24           |                  |       | 55–64           |                  |       |
| 1983–1987       | 4.0             | 15.2             | 108.6 | 7.0             | 33.2             | 78.0  | 1.6             | 6.2              | 90.2  | 2.2             | 12.1             | 61.4  |
| 1988–1992       | 2.0             | 8.3              | 83.5  | 9.0             | 33.2             | 93.5  | 1.0             | 4.1              | 77.6  | 3.8             | 15.0             | 84.1  |
| 1993–1997       | 3.0             | 10.8             | 95.3  | 11.6            | 39.7             | 98.6  | 1.2             | 4.5              | 86.4  | 4.2             | 14.8             | 93.1  |
| 1998–2002       | 3.4             | 14.2             | 89.7  | 18.6            | 59.6             | 93.9  | 1.0             | 5.2              | 74.5  | 4.6             | 16.0             | 85.3  |
| 2003–2007       | 4.6             | 19.2             | 110.3 | 19.8            | 56.4             | 97.8  | 1.0             | 6.1              | 68.1  | 4.8             | 14.7             | 87.5  |
| 2008–2012       | 4.0             | 20.4             | 96.2  | 17.0            | 47.9             | 98.7  | 1.6             | 8.6              | 88.5  | 4.6             | 13.4             | 90.1  |
|                 | 25–34           |                  |       | 65–74           |                  |       | 25–34           |                  |       | 65–74           |                  |       |
| 1983–1987       | 4.6             | 17.9             | 70.0  | 4.4             | 37.5             | 85.5  | 2.2             | 8.4              | 78.2  | 4.4             | 27.4             | 87.6  |
| 1988–1992       | 4.6             | 17.0             | 89.1  | 7.0             | 43.2             | 122.6 | 2.4             | 8.6              | 98.7  | 4.4             | 22.6             | 86.5  |
| 1993–1997       | 3.4             | 13.8             | 70.8  | 5.2             | 27.0             | 84.6  | 1.0             | 5.5              | 65.8  | 5.0             | 20.4             | 104.9 |
| 1998–2002       | 7.8             | 25.6             | 94.8  | 11.4            | 46.7             | 102.6 | 2.8             | 10.2             | 88.0  | 3.8             | 16.0             | 76.2  |
| 2003–2007       | 10.0            | 32.2             | 103.8 | 11.2            | 43.0             | 100.2 | 3.0             | 11.2             | 86.5  | 4.4             | 16.5             | 88.9  |
| 2008–2012       | 7.4             | 29.1             | 89.5  | 9.6             | 35.4             | 89.7  | 2.2             | 10.9             | 76.2  | 4.2             | 15.4             | 86.3  |
|                 | 35–44           |                  |       | >74 y/o         |                  |       | 35–44           |                  |       | >74 y/o         |                  |       |
| 1983–1987       | 11.4            | 31.6             | 99.2  | 6.8             | 92.8             | 118.5 | 4.0             | 11.4             | 96.7  | 6.6             | 58.6             | 101.5 |
| 1988–1992       | 9.0             | 24.8             | 104.7 | 4.4             | 53.3             | 82.6  | 1.6             | 6.4              | 66.4  | 8.2             | 54.9             | 114.8 |
| 1993–1997       | 8.4             | 25.8             | 105.2 | 4.4             | 44.3             | 85.0  | 2.2             | 7.4              | 87.1  | 6.8             | 36.8             | 106.8 |
| 1998–2002       | 10.2            | 34.3             | 97.4  | 6.8             | 51.6             | 97.9  | 1.4             | 6.8              | 65.8  | 6.6             | 28.7             | 92.3  |
| 2003–2007       | 11.6            | 39.1             | 97.6  | 6.6             | 38.2             | 84.9  | 3.0             | 11.2             | 89.1  | 5.0             | 17.7             | 79.1  |
| 2008–2012       | 13.2            | 40.0             | 107.6 | 7.8             | 36.3             | 87.4  | 3.8             | 12.9             | 95.5  | 6.2             | 18.2             | 94.7  |

Secondary Medical Zone ID: 172

|                 | Male            |                  |       |                 |                  |       | Female          |                  |       |                 |                  |       |
|-----------------|-----------------|------------------|-------|-----------------|------------------|-------|-----------------|------------------|-------|-----------------|------------------|-------|
|                 | Suicide         |                  |       | Suicide         |                  |       | Suicide         |                  |       | Suicide         |                  |       |
|                 | Num<br>per year | Rate<br>/100,000 | × 100 | Num<br>per year | Rate<br>/100,000 | × 100 | Num<br>per year | Rate<br>/100,000 | × 100 | Num<br>per year | Rate<br>/100,000 | × 100 |
|                 |                 |                  |       |                 |                  |       |                 |                  |       |                 |                  |       |
| Total (>10 y/o) | 45–54           | Total (>10 y/o)  | 45–54 |                 |                  |       |                 |                  |       |                 |                  |       |
| 1983–1987       | 51.2            | 31.5             | 94.6  | 12.0            | 47.7             | 94.4  | 28.2            | 14.9             | 98.7  | 2.8             | 13.4             | 77.6  |
| 1988–1992       | 39.4            | 22.0             | 87.2  | 5.8             | 23.2             | 67.6  | 26.4            | 12.2             | 97.6  | 3.8             | 14.5             | 98.9  |
| 1993–1997       | 40.2            | 21.2             | 80.5  | 10.0            | 30.7             | 84.0  | 23.0            | 10.0             | 93.3  | 3.8             | 12.4             | 96.2  |
| 1998–2002       | 56.8            | 28.3             | 74.2  | 13.8            | 39.8             | 71.1  | 27.8            | 11.8             | 93.0  | 4.8             | 14.4             | 95.7  |
| 2003–2007       | 62.4            | 30.3             | 77.3  | 13.6            | 42.1             | 75.3  | 23.0            | 10.8             | 81.1  | 3.6             | 12.2             | 89.2  |
| 2008–2012       | 65.0            | 31.2             | 86.1  | 12.4            | 43.5             | 89.6  | 22.0            | 10.8             | 79.4  | 2.4             | 10.8             | 72.6  |
|                 | 15–24           |                  |       | 55–64           |                  |       | 15–24           |                  |       | 55–64           |                  |       |
| 1983–1987       | 3.6             | 15.3             | 109.4 | 7.2             | 36.3             | 85.4  | 0.4             | 4.2              | 61.2  | 4.8             | 20.3             | 102.8 |
| 1988–1992       | 2.8             | 10.2             | 102.8 | 7.6             | 32.2             | 90.7  | 1.0             | 4.5              | 84.9  | 3.8             | 16.0             | 89.8  |
| 1993–1997       | 2.8             | 10.2             | 90.5  | 7.4             | 31.9             | 79.1  | 1.4             | 5.1              | 97.9  | 4.0             | 15.7             | 98.9  |
| 1998–2002       | 2.6             | 11.7             | 74.0  | 12.6            | 48.6             | 76.5  | 2.0             | 7.4              | 105.0 | 5.4             | 19.7             | 104.5 |
| 2003–2007       | 5.0             | 19.2             | 109.8 | 12.4            | 40.2             | 69.7  | 2.2             | 9.3              | 103.0 | 4.6             | 15.5             | 92.5  |
| 2008–2012       | 5.0             | 22.7             | 107.1 | 14.6            | 41.8             | 86.0  | 1.4             | 8.1              | 83.8  | 4.4             | 13.6             | 91.2  |
|                 | 25–34           |                  |       | 65–74           |                  |       | 25–34           |                  |       | 65–74           |                  |       |
| 1983–1987       | 8.0             | 25.9             | 101.3 | 5.6             | 46.0             | 105.0 | 2.4             | 9.1              | 84.5  | 4.6             | 29.2             | 93.3  |
| 1988–1992       | 5.6             | 19.9             | 104.2 | 4.8             | 34.0             | 96.5  | 2.0             | 8.0              | 92.1  | 3.2             | 18.9             | 72.3  |
| 1993–1997       | 6.2             | 21.5             | 109.9 | 5.6             | 30.5             | 95.6  | 0.8             | 5.4              | 64.4  | 4.6             | 20.3             | 104.3 |
| 1998–2002       | 6.2             | 21.8             | 80.6  | 9.8             | 45.6             | 100.2 | 2.2             | 9.4              | 81.1  | 3.6             | 16.6             | 78.8  |
| 2003–2007       | 9.6             | 29.4             | 94.8  | 7.8             | 36.5             | 85.0  | 2.0             | 9.1              | 70.3  | 2.2             | 12.1             | 64.8  |
| 2008–2012       | 8.8             | 30.1             | 92.4  | 8.0             | 34.7             | 87.8  | 3.0             | 12.5             | 87.1  | 3.6             | 15.6             | 87.8  |
|                 | 35–44           |                  |       | >74 y/o         |                  |       | 35–44           |                  |       | >74 y/o         |                  |       |
| 1983–1987       | 8.6             | 26.7             | 83.8  | 6.0             | 83.4             | 106.5 | 3.4             | 11.4             | 96.2  | 9.8             | 87.0             | 150.7 |
| 1988–1992       | 7.2             | 20.5             | 86.4  | 5.6             | 63.5             | 98.5  | 2.6             | 8.5              | 88.2  | 10.0            | 67.4             | 140.9 |
| 1993–1997       | 5.0             | 16.7             | 68.2  | 3.0             | 33.3             | 63.9  | 2.0             | 7.1              | 83.6  | 6.4             | 35.8             | 104.0 |
| 1998–2002       | 7.6             | 27.1             | 76.8  | 4.2             | 36.5             | 69.2  | 2.6             | 9.6              | 92.6  | 7.2             | 32.0             | 103.1 |
| 2003–2007       | 9.4             | 33.0             | 82.4  | 4.6             | 30.3             | 67.3  | 3.0             | 11.7             | 92.7  | 5.4             | 19.9             | 88.5  |
| 2008–2012       | 9.6             | 32.1             | 86.2  | 6.6             | 34.1             | 82.1  | 2.2             | 10.2             | 75.1  | 5.0             | 16.2             | 84.2  |

Secondary Medical Zone ID: 173

|                 | Male            |                  |       |                 |                  |       | Female          |                  |       |                 |                  |       |
|-----------------|-----------------|------------------|-------|-----------------|------------------|-------|-----------------|------------------|-------|-----------------|------------------|-------|
|                 | Suicide         |                  |       | Suicide         |                  |       | Suicide         |                  |       | Suicide         |                  |       |
|                 | Num<br>per year | Rate<br>/100,000 | × 100 | Num<br>per year | Rate<br>/100,000 | × 100 | Num<br>per year | Rate<br>/100,000 | × 100 | Num<br>per year | Rate<br>/100,000 | × 100 |
|                 |                 |                  |       |                 |                  |       |                 |                  |       |                 |                  |       |
| Total (>10 y/o) | 45–54           | Total (>10 y/o)  | 45–54 |                 |                  |       |                 |                  |       |                 |                  |       |
| 1983–1987       | 75.0            | 25.3             | 73.9  | 16.6            | 33.9             | 67.1  | 45.8            | 13.5             | 87.2  | 6.2             | 13.2             | 76.7  |
| 1988–1992       | 61.4            | 18.9             | 72.8  | 13.6            | 25.4             | 73.8  | 37.0            | 10.1             | 74.9  | 5.4             | 11.1             | 75.8  |
| 1993–1997       | 68.4            | 19.2             | 73.6  | 15.6            | 26.5             | 72.4  | 36.0            | 8.7              | 79.2  | 5.0             | 9.4              | 72.4  |
| 1998–2002       | 102.8           | 27.2             | 72.8  | 28.4            | 46.2             | 82.6  | 39.0            | 10.0             | 71.8  | 6.8             | 12.2             | 80.8  |
| 2003–2007       | 109.6           | 28.3             | 74.7  | 24.0            | 43.2             | 77.2  | 39.8            | 10.1             | 74.9  | 5.0             | 10.3             | 75.4  |
| 2008–2012       | 112.0           | 29.8             | 81.8  | 20.8            | 40.0             | 82.4  | 47.8            | 11.7             | 88.4  | 5.8             | 12.3             | 82.2  |
|                 | 15–24           |                  |       | 55–64           |                  |       | 15–24           |                  |       | 55–64           |                  |       |
| 1983–1987       | 4.0             | 8.9              | 63.9  | 9.8             | 28.7             | 67.4  | 2.2             | 5.0              | 73.3  | 7.6             | 18.7             | 94.7  |
| 1988–1992       | 4.8             | 8.9              | 90.3  | 10.4            | 24.5             | 69.1  | 2.2             | 4.3              | 82.1  | 6.0             | 13.9             | 77.9  |
| 1993–1997       | 5.4             | 10.2             | 90.6  | 12.8            | 27.9             | 69.3  | 2.6             | 4.9              | 94.8  | 5.8             | 12.4             | 77.9  |
| 1998–2002       | 6.4             | 13.7             | 86.7  | 22.8            | 44.8             | 70.6  | 4.2             | 8.3              | 118.7 | 6.4             | 13.5             | 71.9  |
| 2003–2007       | 5.8             | 14.3             | 82.1  | 26.0            | 44.8             | 77.7  | 4.4             | 10.2             | 113.3 | 9.6             | 16.3             | 97.1  |
| 2008–2012       | 7.2             | 19.3             | 91.1  | 20.8            | 36.2             | 74.5  | 3.6             | 9.9              | 102.3 | 8.4             | 14.2             | 95.3  |
|                 | 25–34           |                  |       | 65–74           |                  |       | 25–34           |                  |       | 65–74           |                  |       |
| 1983–1987       | 10.8            | 19.7             | 77.1  | 8.8             | 42.6             | 97.3  | 6.0             | 10.9             | 101.2 | 8.2             | 29.7             | 94.9  |
| 1988–1992       | 6.4             | 12.3             | 64.4  | 7.8             | 31.7             | 90.1  | 4.2             | 8.2              | 94.0  | 6.8             | 21.3             | 81.7  |
| 1993–1997       | 8.0             | 14.7             | 75.1  | 10.2            | 31.3             | 98.1  | 2.0             | 5.0              | 59.7  | 7.4             | 19.0             | 97.6  |
| 1998–2002       | 14.4            | 23.8             | 88.3  | 12.4            | 33.3             | 73.2  | 4.6             | 8.9              | 77.1  | 7.4             | 17.4             | 82.8  |
| 2003–2007       | 11.8            | 21.2             | 68.3  | 13.4            | 32.1             | 74.9  | 3.6             | 8.0              | 61.5  | 5.2             | 12.4             | 66.5  |
| 2008–2012       | 15.0            | 29.5             | 90.6  | 15.2            | 33.2             | 84.1  | 4.6             | 10.8             | 75.6  | 7.0             | 14.7             | 82.7  |
|                 | 35–44           |                  |       | >74 y/o         |                  |       | 35–44           |                  |       | >74 y/o         |                  |       |
| 1983–1987       | 16.6            | 26.5             | 83.1  | 8.2             | 69.1             | 88.2  | 6.2             | 10.4             | 87.7  | 9.4             | 52.4             | 90.8  |
| 1988–1992       | 10.0            | 16.6             | 69.8  | 8.4             | 56.6             | 87.7  | 3.4             | 6.6              | 68.5  | 9.0             | 36.7             | 76.8  |
| 1993–1997       | 9.2             | 16.8             | 68.5  | 6.8             | 39.5             | 75.8  | 4.2             | 7.8              | 92.1  | 9.0             | 28.9             | 83.9  |
| 1998–2002       | 10.6            | 20.7             | 58.7  | 7.6             | 36.0             | 68.3  | 4.2             | 8.6              | 83.2  | 5.4             | 15.0             | 48.2  |
| 2003–2007       | 18.4            | 32.4             | 80.9  | 10.0            | 34.8             | 77.2  | 5.0             | 10.2             | 80.6  | 7.0             | 15.0             | 66.7  |
| 2008–2012       | 22.2            | 36.0             | 96.7  | 10.6            | 30.1             | 72.5  | 8.6             | 14.5             | 107.1 | 9.6             | 16.9             | 87.8  |

Secondary Medical Zone ID: 174

|                 | Male            |                  |       |                 |                  |       | Female          |                  |       |                 |                  |       |
|-----------------|-----------------|------------------|-------|-----------------|------------------|-------|-----------------|------------------|-------|-----------------|------------------|-------|
|                 | Suicide         |                  |       | Suicide         |                  |       | Suicide         |                  |       | Suicide         |                  |       |
|                 | Num<br>per year | Rate<br>/100,000 | × 100 | Num<br>per year | Rate<br>/100,000 | × 100 | Num<br>per year | Rate<br>/100,000 | × 100 | Num<br>per year | Rate<br>/100,000 | × 100 |
|                 |                 |                  |       |                 |                  |       |                 |                  |       |                 |                  |       |
| Total (>10 y/o) | 45–54           | Total (>10 y/o)  | 45–54 |                 |                  |       |                 |                  |       |                 |                  |       |
| 1983–1987       | 246.4           | 29.7             | 89.6  | 57.0            | 40.2             | 79.6  | 135.0           | 15.3             | 99.8  | 22.2            | 15.7             | 91.1  |
| 1988–1992       | 199.6           | 22.1             | 89.1  | 47.4            | 30.7             | 89.4  | 129.2           | 12.9             | 102.0 | 18.6            | 12.5             | 85.6  |
| 1993–1997       | 216.8           | 22.3             | 88.9  | 56.6            | 33.9             | 92.7  | 108.0           | 10.3             | 93.6  | 19.0            | 11.9             | 92.4  |
| 1998–2002       | 331.6           | 32.7             | 90.8  | 76.2            | 48.8             | 87.3  | 144.4           | 13.0             | 102.3 | 24.2            | 16.0             | 106.6 |
| 2003–2007       | 310.6           | 29.9             | 82.3  | 56.6            | 41.6             | 74.3  | 146.0           | 13.0             | 103.4 | 19.2            | 14.6             | 106.2 |
| 2008–2012       | 323.4           | 31.5             | 91.1  | 57.4            | 42.2             | 86.9  | 133.6           | 12.1             | 93.6  | 17.4            | 13.5             | 90.4  |
|                 | 15–24           |                  |       | 55–64           |                  |       | 15–24           |                  |       | 55–64           |                  |       |
| 1983–1987       | 22.8            | 13.6             | 97.5  | 34.8            | 38.5             | 90.6  | 10.8            | 6.9              | 100.5 | 21.8            | 20.9             | 106.1 |
| 1988–1992       | 15.8            | 8.9              | 89.8  | 38.0            | 33.1             | 93.1  | 10.0            | 5.9              | 112.3 | 21.0            | 17.4             | 97.6  |
| 1993–1997       | 16.8            | 10.2             | 89.8  | 46.8            | 36.6             | 90.8  | 8.4             | 5.3              | 102.3 | 19.4            | 14.7             | 92.4  |
| 1998–2002       | 22.4            | 15.7             | 99.3  | 83.4            | 59.8             | 94.1  | 9.2             | 6.9              | 97.9  | 26.0            | 18.3             | 97.4  |
| 2003–2007       | 17.6            | 14.3             | 82.1  | 74.2            | 48.7             | 84.4  | 11.8            | 9.8              | 109.1 | 27.0            | 17.6             | 105.0 |
| 2008–2012       | 22.0            | 19.9             | 94.0  | 67.8            | 46.5             | 95.7  | 8.8             | 8.3              | 85.4  | 19.6            | 13.7             | 91.9  |
|                 | 25–34           |                  |       | 65–74           |                  |       | 25–34           |                  |       | 65–74           |                  |       |
| 1983–1987       | 36.6            | 23.5             | 92.1  | 23.8            | 47.2             | 107.9 | 15.6            | 10.6             | 98.8  | 16.6            | 25.3             | 81.1  |
| 1988–1992       | 25.8            | 16.6             | 86.7  | 16.0            | 28.3             | 80.2  | 14.6            | 9.8              | 112.5 | 20.6            | 26.1             | 100.2 |
| 1993–1997       | 22.6            | 14.0             | 71.9  | 24.8            | 32.7             | 102.5 | 14.4            | 9.2              | 110.2 | 11.2            | 12.5             | 63.9  |
| 1998–2002       | 40.2            | 23.6             | 87.3  | 40.0            | 42.0             | 92.4  | 20.6            | 12.4             | 107.3 | 22.2            | 20.2             | 96.1  |
| 2003–2007       | 44.6            | 27.1             | 87.3  | 44.0            | 40.4             | 94.1  | 22.2            | 13.9             | 106.6 | 21.6            | 17.5             | 94.2  |
| 2008–2012       | 46.4            | 31.5             | 96.7  | 44.6            | 37.8             | 95.8  | 19.4            | 13.9             | 97.1  | 24.8            | 18.6             | 104.7 |
|                 | 35–44           |                  |       | >74 y/o         |                  |       | 35–44           |                  |       | >74 y/o         |                  |       |
| 1983–1987       | 49.6            | 27.7             | 87.1  | 20.8            | 81.1             | 103.5 | 19.0            | 11.0             | 92.9  | 28.4            | 74.9             | 129.9 |
| 1988–1992       | 34.2            | 20.6             | 86.9  | 22.2            | 67.6             | 104.8 | 17.4            | 10.7             | 111.0 | 26.4            | 50.7             | 106.0 |
| 1993–1997       | 31.4            | 22.1             | 90.1  | 17.6            | 46.6             | 89.6  | 14.2            | 10.2             | 120.2 | 21.4            | 32.9             | 95.6  |
| 1998–2002       | 45.0            | 32.0             | 91.0  | 23.2            | 49.1             | 93.2  | 17.2            | 12.5             | 120.9 | 24.8            | 30.0             | 96.5  |
| 2003–2007       | 47.6            | 30.7             | 76.6  | 25.0            | 39.4             | 87.5  | 19.0            | 12.8             | 101.0 | 24.6            | 23.2             | 103.2 |
| 2008–2012       | 56.8            | 33.1             | 89.0  | 27.4            | 34.3             | 82.7  | 20.8            | 12.8             | 94.1  | 22.6            | 17.4             | 90.4  |

Secondary Medical Zone ID: 175

|                 | Male            |                  |       |                 |                  |       | Female          |                  |       |                 |                  |       |
|-----------------|-----------------|------------------|-------|-----------------|------------------|-------|-----------------|------------------|-------|-----------------|------------------|-------|
|                 | Suicide         |                  |       | Suicide         |                  |       | Suicide         |                  |       | Suicide         |                  |       |
|                 | Num<br>per year | Rate<br>/100,000 | × 100 | Num<br>per year | Rate<br>/100,000 | × 100 | Num<br>per year | Rate<br>/100,000 | × 100 | Num<br>per year | Rate<br>/100,000 | × 100 |
|                 |                 |                  |       |                 |                  |       |                 |                  |       |                 |                  |       |
| Total (>10 y/o) | 45–54           | Total (>10 y/o)  | 45–54 |                 |                  |       |                 |                  |       |                 |                  |       |
| 1983–1987       | 26.6            | 27.2             | 74.4  | 4.8             | 27.8             | 55.0  | 14.8            | 13.4             | 85.0  | 2.4             | 14.5             | 84.1  |
| 1988–1992       | 21.4            | 19.8             | 71.9  | 5.4             | 24.6             | 71.7  | 16.6            | 12.3             | 95.3  | 2.6             | 12.7             | 86.8  |
| 1993–1997       | 29.4            | 22.2             | 84.1  | 7.0             | 29.2             | 79.8  | 17.8            | 11.0             | 104.8 | 2.4             | 10.6             | 82.3  |
| 1998–2002       | 40.0            | 29.8             | 75.0  | 11.4            | 50.3             | 89.9  | 21.4            | 12.6             | 101.6 | 3.2             | 14.0             | 92.7  |
| 2003–2007       | 46.8            | 32.6             | 84.6  | 10.2            | 53.7             | 96.0  | 21.6            | 12.1             | 102.8 | 1.6             | 10.8             | 79.0  |
| 2008–2012       | 43.4            | 30.2             | 84.4  | 7.2             | 40.7             | 83.7  | 15.4            | 10.9             | 80.1  | 1.4             | 11.0             | 73.5  |
|                 | 15–24           |                  |       | 55–64           |                  |       | 15–24           |                  |       | 55–64           |                  |       |
| 1983–1987       | 1.4             | 8.9              | 63.8  | 5.0             | 42.1             | 99.2  | 1.4             | 6.5              | 95.0  | 2.2             | 18.4             | 93.5  |
| 1988–1992       | 2.2             | 9.4              | 94.6  | 4.6             | 30.0             | 84.4  | 1.2             | 4.9              | 93.8  | 2.2             | 15.8             | 88.7  |
| 1993–1997       | 2.8             | 11.6             | 102.2 | 7.4             | 37.2             | 92.4  | 1.0             | 4.6              | 88.8  | 5.0             | 22.1             | 139.1 |
| 1998–2002       | 3.2             | 16.2             | 102.3 | 9.0             | 42.7             | 67.2  | 1.6             | 7.6              | 108.0 | 5.6             | 22.0             | 116.7 |
| 2003–2007       | 2.0             | 14.7             | 84.5  | 9.0             | 39.9             | 69.1  | 0.6             | 6.2              | 69.1  | 6.4             | 21.3             | 127.0 |
| 2008–2012       | 1.4             | 14.6             | 69.0  | 7.6             | 38.3             | 78.8  | 1.0             | 8.0              | 82.9  | 3.0             | 13.6             | 91.2  |
|                 | 25–34           |                  |       | 65–74           |                  |       | 25–34           |                  |       | 65–74           |                  |       |
| 1983–1987       | 3.4             | 21.9             | 85.6  | 3.6             | 51.0             | 116.5 | 3.2             | 14.5             | 135.1 | 1.4             | 21.7             | 69.4  |
| 1988–1992       | 3.4             | 18.9             | 98.7  | 2.0             | 29.9             | 84.7  | 2.2             | 10.3             | 119.0 | 3.0             | 28.2             | 108.1 |
| 1993–1997       | 2.8             | 15.0             | 76.6  | 2.6             | 27.3             | 85.7  | 1.8             | 8.3              | 99.8  | 2.8             | 21.8             | 112.0 |
| 1998–2002       | 6.2             | 25.2             | 93.2  | 3.4             | 31.0             | 68.1  | 2.8             | 11.4             | 98.3  | 3.0             | 20.7             | 98.6  |
| 2003–2007       | 6.6             | 28.4             | 91.6  | 7.0             | 40.2             | 93.8  | 2.6             | 11.8             | 91.1  | 3.4             | 18.9             | 101.4 |
| 2008–2012       | 5.6             | 30.6             | 93.8  | 8.0             | 38.4             | 97.2  | 2.0             | 12.4             | 86.8  | 3.0             | 15.5             | 87.2  |
|                 | 35–44           |                  |       | >74 y/o         |                  |       | 35–44           |                  |       | >74 y/o         |                  |       |
| 1983–1987       | 5.4             | 22.9             | 72.1  | 3.0             | 85.4             | 109.0 | 3.2             | 11.8             | 100.1 | 0.8             | 26.1             | 45.3  |
| 1988–1992       | 2.0             | 12.8             | 54.0  | 1.8             | 49.5             | 76.7  | 1.6             | 8.1              | 83.6  | 3.8             | 51.8             | 108.3 |
| 1993–1997       | 4.4             | 23.2             | 94.7  | 2.4             | 48.4             | 92.9  | 1.4             | 7.7              | 91.1  | 3.4             | 36.6             | 106.3 |
| 1998–2002       | 4.6             | 26.2             | 74.5  | 2.2             | 40.6             | 77.0  | 1.6             | 9.3              | 89.5  | 3.6             | 31.5             | 101.3 |
| 2003–2007       | 8.2             | 36.7             | 91.5  | 3.8             | 44.4             | 98.5  | 2.2             | 11.3             | 89.2  | 4.6             | 30.3             | 135.2 |
| 2008–2012       | 8.2             | 32.6             | 87.7  | 5.4             | 44.7             | 107.6 | 2.2             | 10.9             | 80.5  | 2.8             | 17.0             | 88.4  |



Secondary Medical Zone ID: 176

|           | Male            |                  |       |                 |                  |       | Female          |                  |       |                 |                  |       |
|-----------|-----------------|------------------|-------|-----------------|------------------|-------|-----------------|------------------|-------|-----------------|------------------|-------|
|           | Suicide         |                  |       | Suicide         |                  |       | Suicide         |                  |       | Suicide         |                  |       |
|           | Num<br>per year | Rate<br>/100,000 | × 100 | Num<br>per year | Rate<br>/100,000 | × 100 | Num<br>per year | Rate<br>/100,000 | × 100 | Num<br>per year | Rate<br>/100,000 | × 100 |
|           |                 |                  |       |                 |                  |       |                 |                  |       |                 |                  |       |
|           | Total (>10 y/o) |                  |       | 45–54           |                  |       | Total (>10 y/o) |                  |       | 45–54           |                  |       |
| 1983–1987 | 17.0            | 31.2             | 94.3  | 4.6             | 46.1             | 91.2  | 7.2             | 14.6             | 89.9  | 1.0             | 14.6             | 84.9  |
| 1988–1992 | 11.4            | 21.8             | 80.4  | 3.2             | 29.3             | 85.2  | 5.6             | 11.2             | 79.6  | 1.2             | 13.1             | 89.5  |
| 1993–1997 | 14.6            | 23.4             | 88.3  | 3.0             | 29.4             | 80.2  | 7.4             | 10.7             | 98.0  | 1.8             | 13.5             | 104.2 |
| 1998–2002 | 21.4            | 32.4             | 85.6  | 4.4             | 46.3             | 82.7  | 8.2             | 12.2             | 90.9  | 1.0             | 12.8             | 85.1  |
| 2003–2007 | 23.2            | 33.0             | 88.8  | 4.4             | 51.7             | 92.5  | 10.0            | 12.7             | 102.3 | 1.4             | 14.4             | 105.0 |
| 2008–2012 | 20.8            | 31.2             | 84.7  | 3.4             | 43.1             | 88.7  | 11.0            | 13.1             | 105.4 | 1.0             | 14.0             | 93.7  |
|           | 15–24           |                  |       | 55–64           |                  |       | 15–24           |                  |       | 55–64           |                  |       |
| 1983–1987 | 0.8             | 10.2             | 73.2  | 3.0             | 48.9             | 115.1 | 0.4             | 5.7              | 83.1  | 1.8             | 23.9             | 121.1 |
| 1988–1992 | 1.2             | 9.5              | 96.0  | 2.2             | 32.1             | 90.4  | 0.2             | 3.9              | 73.5  | 1.6             | 19.5             | 109.3 |
| 1993–1997 | 1.8             | 12.4             | 109.6 | 2.8             | 33.9             | 84.2  | 0.2             | 3.9              | 75.2  | 0.6             | 12.0             | 75.5  |
| 1998–2002 | 0.4             | 11.0             | 69.9  | 6.4             | 59.6             | 93.7  | 0.4             | 6.1              | 87.5  | 1.0             | 15.1             | 80.0  |
| 2003–2007 | 1.4             | 17.0             | 97.6  | 5.6             | 51.5             | 89.2  | 0.4             | 7.6              | 84.7  | 1.4             | 14.8             | 88.5  |
| 2008–2012 | 1.0             | 18.1             | 85.1  | 4.2             | 44.6             | 91.8  | 0.6             | 9.2              | 95.2  | 2.4             | 17.3             | 116.0 |
|           | 25–34           |                  |       | 65–74           |                  |       | 25–34           |                  |       | 65–74           |                  |       |
| 1983–1987 | 2.8             | 27.3             | 106.8 | 1.0             | 41.0             | 93.6  | 0.8             | 9.8              | 90.7  | 0.6             | 25.0             | 80.0  |
| 1988–1992 | 0.6             | 12.0             | 62.7  | 0.6             | 28.9             | 82.1  | 1.2             | 10.1             | 116.3 | 0.4             | 18.6             | 71.2  |
| 1993–1997 | 2.6             | 20.9             | 107.2 | 0.8             | 25.4             | 79.5  | 1.2             | 9.4              | 112.5 | 1.6             | 24.5             | 125.7 |
| 1998–2002 | 4.2             | 29.4             | 108.9 | 2.8             | 45.2             | 99.3  | 1.6             | 12.1             | 104.7 | 1.4             | 21.4             | 102.0 |
| 2003–2007 | 2.8             | 25.5             | 82.1  | 4.8             | 52.4             | 122.2 | 1.6             | 13.0             | 100.1 | 2.2             | 22.1             | 118.5 |
| 2008–2012 | 2.8             | 28.3             | 87.0  | 3.8             | 39.3             | 99.5  | 1.6             | 14.5             | 101.0 | 1.8             | 17.8             | 100.2 |
|           | 35–44           |                  |       | >74 y/o         |                  |       | 35–44           |                  |       | >74 y/o         |                  |       |
| 1983–1987 | 4.0             | 30.4             | 95.6  | 0.8             | 70.1             | 89.5  | 1.2             | 10.6             | 89.6  | 1.4             | 63.5             | 110.1 |
| 1988–1992 | 1.8             | 19.1             | 80.6  | 1.6             | 76.1             | 118.1 | 0.8             | 8.7              | 89.7  | 0.2             | 23.9             | 50.0  |
| 1993–1997 | 2.4             | 25.1             | 102.4 | 1.2             | 55.0             | 105.6 | 0.8             | 8.6              | 100.6 | 1.2             | 33.7             | 98.0  |
| 1998–2002 | 1.6             | 24.8             | 70.5  | 1.6             | 57.0             | 108.2 | 1.8             | 13.9             | 134.0 | 1.0             | 25.5             | 82.1  |
| 2003–2007 | 2.6             | 28.8             | 71.9  | 1.6             | 44.6             | 99.1  | 1.8             | 14.5             | 115.0 | 1.2             | 21.3             | 95.1  |
| 2008–2012 | 4.0             | 32.7             | 88.0  | 1.6             | 36.4             | 87.8  | 1.6             | 13.3             | 98.3  | 2.0             | 23.3             | 121.1 |

Secondary Medical Zone ID: 177

|                 | Male            |                  |       |                 |                  |       | Female          |                  |       |                 |                  |       |
|-----------------|-----------------|------------------|-------|-----------------|------------------|-------|-----------------|------------------|-------|-----------------|------------------|-------|
|                 | Suicide         |                  |       | Suicide         |                  |       | Suicide         |                  |       | Suicide         |                  |       |
|                 | Num<br>per year | Rate<br>/100,000 | × 100 | Num<br>per year | Rate<br>/100,000 | × 100 | Num<br>per year | Rate<br>/100,000 | × 100 | Num<br>per year | Rate<br>/100,000 | × 100 |
|                 |                 |                  |       |                 |                  |       |                 |                  |       |                 |                  |       |
| Total (>10 y/o) | 45–54           | Total (>10 y/o)  | 45–54 |                 |                  |       |                 |                  |       |                 |                  |       |
| 1983–1987       | 31.6            | 27.7             | 77.1  | 7.2             | 34.1             | 67.3  | 23.2            | 17.4             | 113.1 | 4.6             | 19.8             | 114.7 |
| 1988–1992       | 30.0            | 21.8             | 82.2  | 7.6             | 28.0             | 81.6  | 22.4            | 13.4             | 107.8 | 4.4             | 15.5             | 106.0 |
| 1993–1997       | 36.2            | 22.0             | 83.6  | 8.2             | 28.3             | 77.3  | 19.0            | 10.2             | 94.5  | 4.2             | 13.0             | 100.4 |
| 1998–2002       | 54.6            | 30.4             | 79.3  | 10.0            | 38.1             | 68.1  | 26.8            | 12.4             | 101.2 | 4.2             | 14.1             | 93.7  |
| 2003–2007       | 56.2            | 28.9             | 77.0  | 7.2             | 32.0             | 57.2  | 26.4            | 11.9             | 97.4  | 3.8             | 14.1             | 103.1 |
| 2008–2012       | 58.6            | 29.8             | 83.2  | 10.2            | 40.6             | 83.5  | 27.6            | 12.5             | 97.4  | 3.6             | 14.3             | 95.8  |
|                 | 15–24           |                  |       | 55–64           |                  |       | 15–24           |                  |       | 55–64           |                  |       |
| 1983–1987       | 2.8             | 10.9             | 78.5  | 5.2             | 39.5             | 93.1  | 1.2             | 5.6              | 82.4  | 2.6             | 19.0             | 96.1  |
| 1988–1992       | 1.8             | 6.9              | 69.8  | 4.4             | 26.1             | 73.6  | 1.2             | 4.3              | 82.1  | 3.0             | 17.1             | 95.8  |
| 1993–1997       | 3.8             | 11.0             | 96.8  | 7.0             | 31.9             | 79.3  | 1.2             | 4.3              | 81.6  | 2.0             | 11.5             | 72.1  |
| 1998–2002       | 5.0             | 15.8             | 100.2 | 12.0            | 45.5             | 71.6  | 1.4             | 5.8              | 82.7  | 4.6             | 17.5             | 92.9  |
| 2003–2007       | 3.0             | 13.1             | 75.0  | 12.8            | 43.5             | 75.4  | 1.0             | 5.9              | 65.4  | 4.6             | 15.2             | 90.5  |
| 2008–2012       | 5.0             | 20.2             | 95.3  | 11.2            | 41.4             | 85.1  | 2.2             | 9.5              | 98.3  | 4.0             | 13.6             | 91.5  |
|                 | 25–34           |                  |       | 65–74           |                  |       | 25–34           |                  |       | 65–74           |                  |       |
| 1983–1987       | 4.6             | 23.9             | 93.4  | 2.2             | 36.3             | 83.0  | 1.8             | 9.4              | 87.2  | 4.4             | 41.4             | 132.6 |
| 1988–1992       | 4.6             | 20.0             | 104.4 | 3.6             | 38.5             | 109.2 | 2.0             | 8.7              | 100.2 | 2.8             | 25.2             | 96.5  |
| 1993–1997       | 4.8             | 17.6             | 90.1  | 4.2             | 33.1             | 103.8 | 0.8             | 5.1              | 61.6  | 2.0             | 16.0             | 82.1  |
| 1998–2002       | 8.8             | 26.4             | 97.7  | 5.2             | 34.9             | 76.8  | 1.6             | 7.4              | 63.5  | 5.4             | 27.5             | 131.1 |
| 2003–2007       | 9.4             | 29.2             | 94.2  | 8.4             | 40.2             | 93.8  | 3.8             | 12.2             | 93.9  | 6.8             | 27.3             | 146.4 |
| 2008–2012       | 7.8             | 29.1             | 89.3  | 8.0             | 32.9             | 83.4  | 3.2             | 12.7             | 88.8  | 5.6             | 20.0             | 112.1 |
|                 | 35–44           |                  |       | >74 y/o         |                  |       | 35–44           |                  |       | >74 y/o         |                  |       |
| 1983–1987       | 5.8             | 21.6             | 67.9  | 3.6             | 98.9             | 126.3 | 2.2             | 8.8              | 74.8  | 6.4             | 112.3            | 194.6 |
| 1988–1992       | 3.4             | 15.0             | 63.2  | 4.4             | 84.1             | 130.4 | 2.4             | 8.8              | 91.3  | 6.6             | 76.8             | 160.6 |
| 1993–1997       | 4.6             | 19.9             | 81.2  | 3.6             | 58.7             | 112.8 | 2.2             | 8.6              | 101.4 | 6.6             | 57.7             | 167.6 |
| 1998–2002       | 9.4             | 34.8             | 98.8  | 4.0             | 52.4             | 99.3  | 3.4             | 12.0             | 116.3 | 6.2             | 43.0             | 138.4 |
| 2003–2007       | 9.2             | 30.3             | 75.7  | 6.2             | 54.0             | 119.9 | 2.0             | 8.9              | 70.4  | 4.4             | 24.7             | 110.0 |
| 2008–2012       | 8.6             | 26.4             | 71.0  | 7.0             | 45.9             | 110.7 | 4.4             | 12.8             | 94.2  | 4.4             | 19.8             | 103.0 |

Secondary Medical Zone ID: 178

|           | Male            |                  |       |                 |                  |       | Female          |                  |       |                 |                  |       |
|-----------|-----------------|------------------|-------|-----------------|------------------|-------|-----------------|------------------|-------|-----------------|------------------|-------|
|           | Suicide         |                  |       | Suicide         |                  |       | Suicide         |                  |       | Suicide         |                  |       |
|           | Num<br>per year | Rate<br>/100,000 | × 100 | Num<br>per year | Rate<br>/100,000 | × 100 | Num<br>per year | Rate<br>/100,000 | × 100 | Num<br>per year | Rate<br>/100,000 | × 100 |
|           |                 |                  |       |                 |                  |       |                 |                  |       |                 |                  |       |
|           | Total (>10 y/o) |                  |       | 45–54           |                  |       | Total (>10 y/o) |                  |       | 45–54           |                  |       |
| 1983–1987 | 46.0            | 27.2             | 78.5  | 12.0            | 37.6             | 74.4  | 31.6            | 15.9             | 106.2 | 5.0             | 16.4             | 95.1  |
| 1988–1992 | 39.4            | 21.1             | 81.4  | 9.4             | 26.5             | 77.3  | 27.6            | 12.5             | 98.7  | 6.0             | 15.8             | 108.4 |
| 1993–1997 | 36.2            | 18.8             | 68.0  | 8.6             | 24.8             | 67.7  | 27.8            | 11.1             | 104.9 | 5.8             | 13.9             | 108.0 |
| 1998–2002 | 67.2            | 30.5             | 80.7  | 17.2            | 49.1             | 87.7  | 32.8            | 12.4             | 100.5 | 6.0             | 15.7             | 104.1 |
| 2003–2007 | 69.2            | 30.6             | 80.7  | 11.4            | 39.4             | 70.4  | 27.4            | 11.3             | 86.5  | 4.4             | 13.9             | 101.1 |
| 2008–2012 | 63.6            | 28.8             | 79.6  | 11.6            | 40.6             | 83.6  | 29.2            | 11.5             | 89.9  | 3.6             | 13.0             | 86.9  |
|           | 15–24           |                  |       | 55–64           |                  |       | 15–24           |                  |       | 55–64           |                  |       |
| 1983–1987 | 3.2             | 10.1             | 72.7  | 7.2             | 38.6             | 90.9  | 2.2             | 6.1              | 88.9  | 5.4             | 23.8             | 120.4 |
| 1988–1992 | 5.6             | 12.9             | 129.9 | 4.6             | 21.2             | 59.7  | 2.2             | 5.3              | 99.9  | 3.6             | 15.5             | 86.9  |
| 1993–1997 | 4.2             | 11.5             | 101.3 | 7.4             | 26.7             | 66.3  | 2.2             | 5.6              | 106.7 | 6.8             | 20.6             | 129.4 |
| 1998–2002 | 3.8             | 13.7             | 86.6  | 14.4            | 43.7             | 68.8  | 2.2             | 7.1              | 100.9 | 5.4             | 16.4             | 87.2  |
| 2003–2007 | 4.8             | 17.8             | 102.3 | 14.8            | 42.1             | 73.0  | 1.6             | 7.1              | 79.1  | 6.4             | 16.5             | 98.4  |
| 2008–2012 | 4.0             | 18.0             | 84.9  | 11.0            | 35.3             | 72.6  | 0.0             | 3.5              | 35.9  | 2.4             | 9.6              | 64.1  |
|           | 25–34           |                  |       | 65–74           |                  |       | 25–34           |                  |       | 65–74           |                  |       |
| 1983–1987 | 5.8             | 20.7             | 80.9  | 3.2             | 34.4             | 78.5  | 3.4             | 10.9             | 101.3 | 6.6             | 41.5             | 132.6 |
| 1988–1992 | 5.2             | 17.7             | 92.4  | 4.4             | 35.6             | 101.1 | 2.2             | 7.7              | 89.2  | 3.4             | 21.8             | 83.7  |
| 1993–1997 | 4.0             | 13.4             | 68.8  | 3.0             | 21.4             | 67.1  | 3.4             | 9.3              | 112.0 | 2.8             | 15.8             | 81.2  |
| 1998–2002 | 10.0            | 26.1             | 96.8  | 8.0             | 38.4             | 84.3  | 4.0             | 10.9             | 93.7  | 6.8             | 26.8             | 127.6 |
| 2003–2007 | 11.0            | 30.5             | 98.4  | 10.0            | 37.7             | 87.8  | 2.4             | 8.7              | 67.3  | 4.4             | 16.5             | 88.4  |
| 2008–2012 | 7.4             | 27.1             | 83.1  | 11.0            | 35.8             | 90.7  | 6.2             | 18.6             | 129.9 | 6.6             | 19.1             | 107.5 |
|           | 35–44           |                  |       | >74 y/o         |                  |       | 35–44           |                  |       | >74 y/o         |                  |       |
| 1983–1987 | 10.4            | 26.6             | 83.6  | 3.8             | 71.9             | 91.8  | 5.4             | 12.6             | 106.8 | 3.6             | 48.2             | 83.6  |
| 1988–1992 | 5.0             | 15.6             | 65.8  | 5.2             | 72.3             | 112.1 | 3.8             | 9.9              | 102.7 | 6.2             | 54.5             | 113.9 |
| 1993–1997 | 5.6             | 19.2             | 78.2  | 3.0             | 40.4             | 77.6  | 2.4             | 7.9              | 93.0  | 4.4             | 31.2             | 90.6  |
| 1998–2002 | 8.6             | 28.8             | 81.7  | 5.2             | 51.7             | 98.1  | 2.6             | 9.1              | 88.0  | 5.8             | 32.4             | 104.2 |
| 2003–2007 | 12.0            | 34.5             | 86.2  | 5.0             | 37.9             | 84.1  | 3.8             | 11.5             | 91.4  | 4.0             | 18.6             | 82.8  |
| 2008–2012 | 11.4            | 30.3             | 81.4  | 7.2             | 38.9             | 93.9  | 4.2             | 11.7             | 86.1  | 6.2             | 21.6             | 112.1 |

Secondary Medical Zone ID: 179

|           | Male            |          |       |          |          |       | Female          |          |       |          |          |       |
|-----------|-----------------|----------|-------|----------|----------|-------|-----------------|----------|-------|----------|----------|-------|
|           | Suicide         |          |       | Suicide  |          |       | Suicide         |          |       | Suicide  |          |       |
|           | Num             | Rate     | × 100 | Num      | Rate     | × 100 | Num             | Rate     | × 100 | Num      | Rate     | × 100 |
|           | per year        | /100,000 |       | per year | /100,000 |       | per year        | /100,000 |       | per year | /100,000 |       |
|           | Total (>10 y/o) |          |       | 45–54    |          |       | Total (>10 y/o) |          |       | 45–54    |          |       |
| 1983–1987 | 65.4            | 29.7     | 85.5  | 16.4     | 38.8     | 76.8  | 41.0            | 17.1     | 112.4 | 6.0      | 16.0     | 92.6  |
| 1988–1992 | 55.8            | 22.3     | 85.6  | 13.2     | 26.2     | 76.4  | 36.8            | 13.0     | 103.9 | 7.0      | 14.4     | 98.6  |
| 1993–1997 | 57.8            | 20.2     | 77.1  | 17.8     | 32.2     | 88.1  | 30.4            | 9.8      | 89.7  | 5.2      | 10.1     | 78.3  |
| 1998–2002 | 97.2            | 30.3     | 82.8  | 23.0     | 46.5     | 83.1  | 44.6            | 12.5     | 101.7 | 5.8      | 12.1     | 80.2  |
| 2003–2007 | 107.4           | 32.4     | 88.1  | 20.6     | 49.6     | 88.7  | 46.0            | 12.2     | 103.3 | 4.6      | 11.6     | 84.8  |
| 2008–2012 | 111.6           | 32.9     | 96.3  | 19.8     | 48.2     | 99.1  | 47.8            | 12.8     | 104.0 | 5.4      | 13.9     | 93.3  |
|           | 15–24           |          |       | 55–64    |          |       | 15–24           |          |       | 55–64    |          |       |
| 1983–1987 | 4.8             | 10.8     | 77.5  | 9.0      | 39.3     | 92.5  | 3.4             | 7.1      | 104.1 | 5.8      | 22.6     | 114.5 |
| 1988–1992 | 3.6             | 7.4      | 74.2  | 9.6      | 30.2     | 85.1  | 4.2             | 7.0      | 133.4 | 4.8      | 16.3     | 91.1  |
| 1993–1997 | 4.8             | 9.4      | 83.4  | 11.8     | 29.9     | 74.2  | 1.8             | 3.9      | 75.4  | 4.6      | 12.9     | 81.0  |
| 1998–2002 | 6.2             | 14.2     | 89.6  | 25.6     | 52.3     | 82.4  | 2.8             | 6.7      | 94.9  | 8.8      | 18.4     | 97.9  |
| 2003–2007 | 6.2             | 16.4     | 94.2  | 24.4     | 46.6     | 80.8  | 2.4             | 7.3      | 81.7  | 11.2     | 19.3     | 115.4 |
| 2008–2012 | 7.4             | 20.9     | 98.6  | 21.4     | 44.9     | 92.5  | 4.0             | 11.3     | 116.2 | 5.8      | 12.2     | 81.9  |
|           | 25–34           |          |       | 65–74    |          |       | 25–34           |          |       | 65–74    |          |       |
| 1983–1987 | 8.2             | 21.7     | 85.1  | 6.0      | 48.3     | 110.4 | 2.8             | 7.9      | 73.3  | 8.4      | 46.5     | 148.9 |
| 1988–1992 | 5.0             | 13.2     | 68.8  | 6.2      | 40.1     | 113.9 | 2.0             | 6.1      | 70.2  | 4.6      | 24.4     | 93.4  |
| 1993–1997 | 5.6             | 12.5     | 64.1  | 6.2      | 30.4     | 95.2  | 3.8             | 8.1      | 97.1  | 4.6      | 19.6     | 100.8 |
| 1998–2002 | 10.8            | 19.9     | 73.8  | 12.6     | 44.5     | 97.8  | 5.8             | 10.8     | 93.4  | 7.8      | 25.5     | 121.2 |
| 2003–2007 | 15.4            | 28.1     | 90.5  | 16.0     | 43.3     | 100.9 | 6.8             | 12.9     | 99.4  | 8.4      | 22.0     | 118.4 |
| 2008–2012 | 12.4            | 28.0     | 85.8  | 18.0     | 40.1     | 101.6 | 4.6             | 11.7     | 81.5  | 10.4     | 21.6     | 121.3 |
|           | 35–44           |          |       | >74 y/o  |          |       | 35–44           |          |       | >74 y/o  |          |       |
| 1983–1987 | 13.2            | 23.9     | 75.2  | 7.2      | 109.4    | 139.7 | 6.6             | 11.4     | 96.9  | 7.6      | 83.7     | 145.1 |
| 1988–1992 | 9.4             | 19.1     | 80.8  | 8.4      | 96.6     | 149.8 | 4.4             | 8.7      | 90.2  | 9.8      | 73.0     | 152.5 |
| 1993–1997 | 6.2             | 15.9     | 64.8  | 5.4      | 54.8     | 105.1 | 2.2             | 6.1      | 71.2  | 7.8      | 44.7     | 129.8 |
| 1998–2002 | 11.6            | 28.0     | 79.6  | 7.0      | 55.2     | 104.6 | 3.2             | 8.5      | 82.2  | 9.8      | 43.0     | 138.5 |
| 2003–2007 | 14.8            | 30.5     | 76.1  | 9.8      | 53.2     | 118.2 | 3.8             | 9.4      | 74.1  | 8.8      | 30.3     | 135.0 |
| 2008–2012 | 21.0            | 35.7     | 95.9  | 11.4     | 46.0     | 111.0 | 7.2             | 13.2     | 97.1  | 10.2     | 27.3     | 142.2 |

Secondary Medical Zone ID: 180

|                 | Male            |                  |       |                 |                  |       | Female          |                  |       |                 |                  |       |
|-----------------|-----------------|------------------|-------|-----------------|------------------|-------|-----------------|------------------|-------|-----------------|------------------|-------|
|                 | Suicide         |                  |       | Suicide         |                  |       | Suicide         |                  |       | Suicide         |                  |       |
|                 | Num<br>per year | Rate<br>/100,000 | × 100 | Num<br>per year | Rate<br>/100,000 | × 100 | Num<br>per year | Rate<br>/100,000 | × 100 | Num<br>per year | Rate<br>/100,000 | × 100 |
|                 |                 |                  |       |                 |                  |       |                 |                  |       |                 |                  |       |
| Total (>10 y/o) | 45–54           | Total (>10 y/o)  | 45–54 |                 |                  |       |                 |                  |       |                 |                  |       |
| 1983–1987       | 56.4            | 28.6             | 84.4  | 15.0            | 42.4             | 83.9  | 34.0            | 15.8             | 103.7 | 3.8             | 13.1             | 75.8  |
| 1988–1992       | 46.0            | 21.1             | 82.3  | 11.2            | 27.8             | 81.0  | 33.2            | 13.1             | 105.5 | 6.0             | 15.2             | 103.7 |
| 1993–1997       | 55.2            | 22.3             | 87.1  | 13.6            | 31.0             | 84.8  | 36.4            | 12.3             | 121.0 | 5.8             | 13.1             | 101.7 |
| 1998–2002       | 86.6            | 32.2             | 88.8  | 18.4            | 44.8             | 80.1  | 40.4            | 13.1             | 109.3 | 5.6             | 13.9             | 92.5  |
| 2003–2007       | 99.4            | 34.7             | 96.7  | 17.8            | 48.6             | 87.0  | 39.4            | 12.8             | 106.0 | 3.0             | 10.2             | 74.5  |
| 2008–2012       | 87.4            | 32.2             | 88.9  | 18.4            | 50.3             | 103.5 | 32.6            | 11.0             | 88.0  | 4.6             | 13.9             | 93.2  |
|                 | 15–24           |                  |       | 55–64           |                  |       | 15–24           |                  |       | 55–64           |                  |       |
| 1983–1987       | 5.6             | 13.6             | 97.8  | 8.0             | 37.1             | 87.2  | 3.0             | 7.2              | 105.0 | 3.2             | 15.6             | 78.9  |
| 1988–1992       | 4.0             | 9.1              | 91.5  | 9.8             | 33.8             | 95.2  | 2.2             | 5.0              | 94.8  | 5.8             | 19.5             | 109.4 |
| 1993–1997       | 3.8             | 9.4              | 82.8  | 12.2            | 36.2             | 90.0  | 1.6             | 4.2              | 80.6  | 4.6             | 14.4             | 90.9  |
| 1998–2002       | 5.4             | 14.7             | 93.1  | 20.4            | 53.0             | 83.5  | 2.4             | 6.7              | 95.8  | 7.2             | 18.9             | 100.5 |
| 2003–2007       | 5.8             | 16.9             | 96.8  | 21.4            | 50.4             | 87.3  | 4.6             | 12.4             | 138.1 | 7.8             | 17.8             | 106.3 |
| 2008–2012       | 8.6             | 24.2             | 114.3 | 13.4            | 35.6             | 73.3  | 2.2             | 8.0              | 82.4  | 5.2             | 13.3             | 89.3  |
|                 | 25–34           |                  |       | 65–74           |                  |       | 25–34           |                  |       | 65–74           |                  |       |
| 1983–1987       | 9.4             | 26.2             | 102.6 | 4.6             | 41.4             | 94.6  | 5.2             | 13.9             | 129.4 | 6.0             | 36.8             | 117.7 |
| 1988–1992       | 5.8             | 16.4             | 85.8  | 3.8             | 29.3             | 83.1  | 1.4             | 5.7              | 65.8  | 5.6             | 29.7             | 114.0 |
| 1993–1997       | 7.8             | 19.1             | 97.7  | 5.4             | 28.8             | 90.1  | 4.4             | 10.5             | 126.7 | 6.2             | 25.9             | 132.7 |
| 1998–2002       | 10.0            | 22.9             | 84.8  | 12.8            | 50.2             | 110.5 | 5.4             | 12.5             | 108.0 | 6.8             | 24.4             | 116.1 |
| 2003–2007       | 13.8            | 30.0             | 96.8  | 15.6            | 50.8             | 118.4 | 4.6             | 11.7             | 89.7  | 6.0             | 19.2             | 103.0 |
| 2008–2012       | 14.6            | 34.7             | 106.5 | 11.0            | 33.1             | 83.8  | 2.6             | 9.4              | 65.8  | 5.4             | 15.9             | 89.5  |
|                 | 35–44           |                  |       | >74 y/o         |                  |       | 35–44           |                  |       | >74 y/o         |                  |       |
| 1983–1987       | 9.6             | 22.4             | 70.4  | 4.0             | 68.5             | 87.5  | 5.2             | 11.7             | 98.9  | 7.4             | 74.3             | 128.7 |
| 1988–1992       | 6.0             | 15.6             | 65.7  | 5.0             | 64.1             | 99.4  | 2.6             | 7.4              | 76.4  | 9.4             | 68.4             | 142.9 |
| 1993–1997       | 6.2             | 17.9             | 72.8  | 6.2             | 64.9             | 124.7 | 3.6             | 9.5              | 112.1 | 10.0            | 57.5             | 167.2 |
| 1998–2002       | 12.4            | 33.7             | 95.6  | 7.2             | 60.1             | 114.1 | 3.2             | 9.6              | 92.7  | 9.8             | 45.5             | 146.7 |
| 2003–2007       | 15.0            | 36.3             | 90.6  | 9.6             | 57.1             | 126.9 | 4.6             | 12.2             | 97.0  | 8.8             | 32.4             | 144.4 |
| 2008–2012       | 15.0            | 32.2             | 86.7  | 6.2             | 31.7             | 76.5  | 3.8             | 10.2             | 75.3  | 8.6             | 25.6             | 132.9 |

Secondary Medical Zone ID: 181

|                 | Male            |                  |       |                 |                  |       | Female          |                  |       |                 |                  |       |
|-----------------|-----------------|------------------|-------|-----------------|------------------|-------|-----------------|------------------|-------|-----------------|------------------|-------|
|                 | Suicide         |                  |       | Suicide         |                  |       | Suicide         |                  |       | Suicide         |                  |       |
|                 | Num<br>per year | Rate<br>/100,000 | × 100 | Num<br>per year | Rate<br>/100,000 | × 100 | Num<br>per year | Rate<br>/100,000 | × 100 | Num<br>per year | Rate<br>/100,000 | × 100 |
|                 |                 |                  |       |                 |                  |       |                 |                  |       |                 |                  |       |
| Total (>10 y/o) | 45–54           | Total (>10 y/o)  | 45–54 |                 |                  |       |                 |                  |       |                 |                  |       |
| 1983–1987       | 33.8            | 27.1             | 75.3  | 8.8             | 43.0             | 85.0  | 17.8            | 14.7             | 91.3  | 3.2             | 17.4             | 100.7 |
| 1988–1992       | 32.8            | 21.9             | 82.6  | 8.6             | 31.1             | 90.6  | 22.6            | 14.0             | 113.4 | 3.6             | 14.8             | 101.5 |
| 1993–1997       | 41.2            | 22.7             | 88.7  | 9.8             | 30.5             | 83.3  | 23.4            | 12.1             | 118.8 | 3.0             | 11.0             | 85.2  |
| 1998–2002       | 59.8            | 30.7             | 81.8  | 13.2            | 42.3             | 75.6  | 26.4            | 12.7             | 105.8 | 3.2             | 12.0             | 80.0  |
| 2003–2007       | 63.8            | 30.5             | 80.0  | 13.4            | 47.0             | 84.0  | 23.4            | 11.6             | 92.5  | 3.6             | 13.3             | 97.2  |
| 2008–2012       | 59.2            | 28.0             | 77.4  | 6.2             | 26.6             | 54.8  | 22.6            | 11.0             | 86.9  | 3.4             | 13.9             | 92.9  |
|                 | 15–24           |                  |       | 55–64           |                  |       | 15–24           |                  |       | 55–64           |                  |       |
| 1983–1987       | 3.2             | 10.1             | 72.3  | 3.8             | 34.3             | 80.7  | 1.6             | 6.6              | 96.4  | 1.4             | 14.9             | 75.7  |
| 1988–1992       | 2.8             | 7.7              | 77.7  | 4.0             | 27.1             | 76.4  | 1.8             | 5.5              | 105.2 | 1.8             | 14.5             | 81.0  |
| 1993–1997       | 5.6             | 12.9             | 114.3 | 7.2             | 35.8             | 89.0  | 3.0             | 7.6              | 145.7 | 4.8             | 21.8             | 137.3 |
| 1998–2002       | 5.2             | 14.9             | 94.0  | 12.8            | 50.5             | 79.4  | 2.6             | 8.2              | 117.0 | 5.6             | 21.6             | 114.8 |
| 2003–2007       | 6.6             | 18.8             | 108.0 | 14.0            | 45.9             | 79.5  | 2.0             | 8.3              | 92.0  | 6.6             | 20.0             | 119.3 |
| 2008–2012       | 4.6             | 16.7             | 78.9  | 12.8            | 42.4             | 87.4  | 1.0             | 6.2              | 64.2  | 2.8             | 11.4             | 76.4  |
|                 | 25–34           |                  |       | 65–74           |                  |       | 25–34           |                  |       | 65–74           |                  |       |
| 1983–1987       | 5.6             | 19.7             | 77.1  | 2.0             | 35.4             | 80.9  | 0.8             | 5.7              | 53.2  | 2.8             | 31.6             | 101.3 |
| 1988–1992       | 3.2             | 11.4             | 59.9  | 3.0             | 36.4             | 103.4 | 2.0             | 8.1              | 92.9  | 3.4             | 30.6             | 117.2 |
| 1993–1997       | 6.6             | 18.0             | 92.0  | 2.8             | 27.5             | 86.1  | 2.2             | 7.9              | 94.6  | 2.4             | 19.2             | 98.7  |
| 1998–2002       | 9.2             | 23.1             | 85.4  | 6.4             | 44.6             | 98.2  | 3.4             | 10.8             | 92.8  | 3.4             | 22.1             | 105.2 |
| 2003–2007       | 9.6             | 24.1             | 77.6  | 5.6             | 33.4             | 77.8  | 2.0             | 8.5              | 65.0  | 2.6             | 16.2             | 87.1  |
| 2008–2012       | 11.2            | 29.7             | 91.1  | 6.8             | 31.6             | 80.0  | 2.2             | 10.1             | 70.6  | 3.4             | 16.3             | 91.6  |
|                 | 35–44           |                  |       | >74 y/o         |                  |       | 35–44           |                  |       | >74 y/o         |                  |       |
| 1983–1987       | 6.6             | 21.3             | 66.9  | 3.4             | 87.7             | 111.9 | 2.8             | 10.0             | 84.7  | 5.0             | 86.1             | 149.2 |
| 1988–1992       | 5.6             | 17.8             | 75.2  | 5.2             | 96.3             | 149.3 | 2.6             | 8.8              | 91.3  | 7.4             | 90.4             | 188.8 |
| 1993–1997       | 5.8             | 20.2             | 82.5  | 3.4             | 57.9             | 111.3 | 2.2             | 8.1              | 95.5  | 5.8             | 56.9             | 165.3 |
| 1998–2002       | 7.2             | 25.3             | 71.8  | 5.2             | 67.0             | 127.0 | 2.4             | 9.5              | 92.0  | 5.8             | 45.3             | 145.9 |
| 2003–2007       | 10.4            | 30.8             | 76.8  | 4.2             | 43.5             | 96.7  | 2.6             | 10.3             | 81.8  | 3.6             | 23.6             | 105.1 |
| 2008–2012       | 12.4            | 32.6             | 87.6  | 5.2             | 41.2             | 99.3  | 4.0             | 12.4             | 91.8  | 5.8             | 28.0             | 145.8 |

Secondary Medical Zone ID: 182

|                 | Male            |                  |       |                 |                  |       | Female          |                  |       |                 |                  |       |
|-----------------|-----------------|------------------|-------|-----------------|------------------|-------|-----------------|------------------|-------|-----------------|------------------|-------|
|                 | Suicide         |                  |       | Suicide         |                  |       | Suicide         |                  |       | Suicide         |                  |       |
|                 | Num<br>per year | Rate<br>/100,000 | × 100 | Num<br>per year | Rate<br>/100,000 | × 100 | Num<br>per year | Rate<br>/100,000 | × 100 | Num<br>per year | Rate<br>/100,000 | × 100 |
|                 |                 |                  |       |                 |                  |       |                 |                  |       |                 |                  |       |
| Total (>10 y/o) | 45–54           | Total (>10 y/o)  | 45–54 |                 |                  |       |                 |                  |       |                 |                  |       |
| 1983–1987       | 30.2            | 27.8             | 78.0  | 8.4             | 44.7             | 88.4  | 21.6            | 16.2             | 107.2 | 3.4             | 17.7             | 103.0 |
| 1988–1992       | 27.6            | 21.3             | 82.1  | 5.8             | 26.8             | 78.0  | 16.2            | 11.6             | 86.9  | 3.6             | 15.6             | 107.0 |
| 1993–1997       | 34.0            | 22.5             | 87.3  | 9.6             | 34.7             | 94.9  | 20.4            | 11.5             | 109.6 | 4.0             | 14.2             | 110.1 |
| 1998–2002       | 51.2            | 31.3             | 83.6  | 14.0            | 50.1             | 89.5  | 23.6            | 12.6             | 101.3 | 4.2             | 15.1             | 100.5 |
| 2003–2007       | 54.8            | 31.0             | 82.2  | 10.6            | 42.6             | 76.2  | 18.8            | 11.2             | 82.9  | 2.2             | 10.8             | 79.0  |
| 2008–2012       | 52.8            | 29.9             | 82.5  | 11.2            | 44.8             | 92.2  | 22.2            | 12.4             | 91.6  | 2.6             | 12.4             | 83.2  |
|                 | 15–24           |                  |       | 55–64           |                  |       | 15–24           |                  |       | 55–64           |                  |       |
| 1983–1987       | 2.2             | 11.4             | 81.8  | 3.0             | 29.4             | 69.3  | 1.2             | 6.0              | 88.3  | 2.6             | 18.6             | 94.3  |
| 1988–1992       | 2.6             | 9.8              | 98.6  | 3.2             | 23.8             | 67.1  | 0.2             | 2.8              | 52.2  | 2.6             | 16.4             | 91.6  |
| 1993–1997       | 2.8             | 10.6             | 93.5  | 5.6             | 32.6             | 81.0  | 1.0             | 4.3              | 83.3  | 2.8             | 15.3             | 96.1  |
| 1998–2002       | 2.8             | 13.0             | 82.2  | 12.2            | 56.3             | 88.6  | 1.8             | 7.2              | 102.8 | 3.4             | 17.2             | 91.2  |
| 2003–2007       | 4.2             | 17.8             | 102.2 | 11.2            | 44.4             | 76.9  | 1.4             | 7.4              | 82.4  | 3.0             | 13.8             | 82.4  |
| 2008–2012       | 3.4             | 18.1             | 85.3  | 8.8             | 35.9             | 73.8  | 2.4             | 10.9             | 112.1 | 3.8             | 14.3             | 95.6  |
|                 | 25–34           |                  |       | 65–74           |                  |       | 25–34           |                  |       | 65–74           |                  |       |
| 1983–1987       | 4.4             | 20.2             | 79.0  | 2.6             | 39.2             | 89.4  | 1.6             | 8.3              | 77.3  | 4.0             | 37.4             | 119.8 |
| 1988–1992       | 3.8             | 16.1             | 84.2  | 2.0             | 28.3             | 80.3  | 2.2             | 9.0              | 103.9 | 2.8             | 24.9             | 95.4  |
| 1993–1997       | 4.6             | 17.4             | 89.0  | 3.6             | 31.9             | 99.9  | 2.4             | 8.9              | 107.3 | 3.8             | 24.7             | 126.7 |
| 1998–2002       | 6.0             | 21.5             | 79.5  | 4.0             | 33.4             | 73.4  | 3.2             | 11.4             | 98.8  | 2.4             | 17.0             | 80.8  |
| 2003–2007       | 9.4             | 29.6             | 95.3  | 8.6             | 49.3             | 115.0 | 3.8             | 13.2             | 101.3 | 3.2             | 18.1             | 97.4  |
| 2008–2012       | 9.2             | 31.9             | 97.8  | 5.0             | 29.4             | 74.5  | 4.4             | 16.0             | 111.6 | 2.2             | 13.9             | 78.3  |
|                 | 35–44           |                  |       | >74 y/o         |                  |       | 35–44           |                  |       | >74 y/o         |                  |       |
| 1983–1987       | 5.4             | 21.6             | 67.8  | 4.2             | 98.5             | 125.7 | 3.0             | 11.5             | 97.0  | 5.6             | 87.4             | 151.5 |
| 1988–1992       | 6.8             | 23.4             | 98.8  | 3.2             | 65.3             | 101.3 | 1.0             | 6.3              | 65.0  | 3.6             | 45.5             | 95.0  |
| 1993–1997       | 4.6             | 18.9             | 77.1  | 3.0             | 53.1             | 102.0 | 2.0             | 8.1              | 95.7  | 4.4             | 42.0             | 121.9 |
| 1998–2002       | 7.4             | 29.6             | 84.0  | 4.6             | 60.8             | 115.4 | 3.2             | 11.9             | 115.1 | 5.2             | 38.3             | 123.3 |
| 2003–2007       | 7.8             | 28.8             | 71.9  | 3.0             | 34.5             | 76.6  | 2.8             | 11.5             | 90.8  | 2.2             | 15.1             | 67.2  |
| 2008–2012       | 8.6             | 29.1             | 78.2  | 6.4             | 48.0             | 115.6 | 3.4             | 12.4             | 91.3  | 3.4             | 17.4             | 90.4  |

Secondary Medical Zone ID: 183

|           | Male            |                  |       |                 |                  |       | Female          |                  |       |                 |                  |       |
|-----------|-----------------|------------------|-------|-----------------|------------------|-------|-----------------|------------------|-------|-----------------|------------------|-------|
|           | Suicide         |                  |       | Suicide         |                  |       | Suicide         |                  |       | Suicide         |                  |       |
|           | Num<br>per year | Rate<br>/100,000 | × 100 | Num<br>per year | Rate<br>/100,000 | × 100 | Num<br>per year | Rate<br>/100,000 | × 100 | Num<br>per year | Rate<br>/100,000 | × 100 |
|           |                 |                  |       |                 |                  |       |                 |                  |       |                 |                  |       |
|           | Total (>10 y/o) |                  |       | 45–54           |                  |       | Total (>10 y/o) |                  |       | 45–54           |                  |       |
| 1983–1987 | 58.0            | 28.6             | 84.7  | 13.0            | 40.1             | 79.2  | 33.8            | 15.3             | 100.4 | 5.4             | 16.8             | 97.2  |
| 1988–1992 | 44.0            | 20.0             | 76.7  | 10.8            | 29.1             | 84.7  | 31.0            | 12.3             | 97.6  | 4.6             | 13.4             | 91.3  |
| 1993–1997 | 54.6            | 21.7             | 83.7  | 10.4            | 25.7             | 70.3  | 33.2            | 11.4             | 109.7 | 5.0             | 12.3             | 95.1  |
| 1998–2002 | 83.2            | 30.2             | 82.1  | 16.2            | 38.6             | 69.0  | 37.4            | 12.5             | 99.8  | 6.6             | 15.5             | 102.9 |
| 2003–2007 | 84.2            | 29.3             | 77.0  | 18.0            | 45.2             | 80.9  | 32.8            | 11.4             | 87.6  | 5.4             | 14.1             | 102.9 |
| 2008–2012 | 94.0            | 30.8             | 87.9  | 18.0            | 44.3             | 91.2  | 34.8            | 11.6             | 89.6  | 5.2             | 14.2             | 95.4  |
|           | 15–24           |                  |       | 55–64           |                  |       | 15–24           |                  |       | 55–64           |                  |       |
| 1983–1987 | 5.2             | 11.6             | 83.0  | 9.0             | 40.5             | 95.2  | 2.2             | 5.9              | 85.7  | 6.4             | 24.3             | 123.1 |
| 1988–1992 | 3.6             | 7.9              | 79.6  | 7.2             | 26.9             | 75.9  | 2.8             | 5.9              | 112.6 | 5.0             | 17.6             | 98.4  |
| 1993–1997 | 5.8             | 11.9             | 105.1 | 10.4            | 33.8             | 84.1  | 3.0             | 6.4              | 122.0 | 7.2             | 20.7             | 130.4 |
| 1998–2002 | 7.0             | 16.8             | 106.6 | 17.0            | 49.1             | 77.3  | 3.0             | 7.7              | 109.0 | 6.4             | 18.3             | 97.1  |
| 2003–2007 | 5.6             | 15.4             | 88.4  | 14.6            | 37.4             | 64.8  | 1.4             | 5.6              | 61.8  | 4.2             | 12.4             | 74.1  |
| 2008–2012 | 6.2             | 17.6             | 83.2  | 16.8            | 40.7             | 83.9  | 1.4             | 5.9              | 60.6  | 4.2             | 11.7             | 78.6  |
|           | 25–34           |                  |       | 65–74           |                  |       | 25–34           |                  |       | 65–74           |                  |       |
| 1983–1987 | 8.4             | 21.1             | 82.5  | 3.8             | 35.0             | 79.8  | 2.4             | 7.6              | 70.9  | 5.2             | 31.2             | 99.7  |
| 1988–1992 | 7.8             | 17.7             | 92.6  | 4.0             | 30.0             | 85.2  | 2.0             | 6.3              | 73.1  | 3.8             | 21.5             | 82.3  |
| 1993–1997 | 9.2             | 18.4             | 94.4  | 4.6             | 25.4             | 79.7  | 3.0             | 7.4              | 89.0  | 4.0             | 18.1             | 93.0  |
| 1998–2002 | 15.0            | 26.9             | 99.5  | 10.2            | 42.4             | 93.3  | 6.0             | 12.3             | 106.0 | 5.2             | 19.8             | 94.4  |
| 2003–2007 | 12.6            | 23.8             | 76.7  | 10.4            | 38.2             | 89.1  | 5.4             | 11.9             | 91.7  | 5.6             | 18.7             | 100.3 |
| 2008–2012 | 13.4            | 27.8             | 85.4  | 11.0            | 35.7             | 90.4  | 4.6             | 12.1             | 84.8  | 7.0             | 20.0             | 112.4 |
|           | 35–44           |                  |       | >74 y/o         |                  |       | 35–44           |                  |       | >74 y/o         |                  |       |
| 1983–1987 | 13.8            | 30.3             | 95.1  | 4.8             | 73.8             | 94.2  | 4.6             | 11.1             | 93.7  | 7.4             | 69.7             | 120.8 |
| 1988–1992 | 5.6             | 13.9             | 58.8  | 4.8             | 59.7             | 92.6  | 4.8             | 10.8             | 111.5 | 8.0             | 56.2             | 117.4 |
| 1993–1997 | 8.0             | 20.0             | 81.5  | 5.8             | 59.2             | 113.7 | 3.0             | 8.1              | 95.0  | 7.8             | 43.9             | 127.7 |
| 1998–2002 | 10.0            | 24.8             | 70.4  | 7.6             | 61.4             | 116.4 | 3.4             | 9.3              | 90.3  | 6.8             | 31.8             | 102.5 |
| 2003–2007 | 15.0            | 31.2             | 77.8  | 8.0             | 47.8             | 106.1 | 4.6             | 11.3             | 89.4  | 5.4             | 20.4             | 90.9  |
| 2008–2012 | 19.2            | 35.1             | 94.5  | 9.0             | 41.9             | 100.9 | 6.2             | 13.0             | 96.2  | 6.0             | 18.4             | 95.7  |



Secondary Medical Zone ID: 184

|                 | Male            |                  |       |                 |                  |       | Female          |                  |       |                 |                  |       |
|-----------------|-----------------|------------------|-------|-----------------|------------------|-------|-----------------|------------------|-------|-----------------|------------------|-------|
|                 | Suicide         |                  |       | Suicide         |                  |       | Suicide         |                  |       | Suicide         |                  |       |
|                 | Num<br>per year | Rate<br>/100,000 | × 100 | Num<br>per year | Rate<br>/100,000 | × 100 | Num<br>per year | Rate<br>/100,000 | × 100 | Num<br>per year | Rate<br>/100,000 | × 100 |
|                 |                 |                  |       |                 |                  |       |                 |                  |       |                 |                  |       |
| Total (>10 y/o) | 45–54           | Total (>10 y/o)  | 45–54 |                 |                  |       |                 |                  |       |                 |                  |       |
| 1983–1987       | 10.8            | 33.3             | 103.0 | 2.2             | 48.6             | 96.0  | 6.2             | 15.4             | 101.9 | 0.2             | 13.8             | 80.0  |
| 1988–1992       | 6.0             | 22.6             | 81.5  | 1.2             | 31.4             | 91.4  | 5.8             | 13.1             | 104.8 | 0.6             | 14.4             | 98.2  |
| 1993–1997       | 8.0             | 24.7             | 96.9  | 2.6             | 42.0             | 114.9 | 3.6             | 10.1             | 88.3  | 0.2             | 11.2             | 86.8  |
| 1998–2002       | 9.0             | 32.8             | 83.3  | 1.8             | 46.8             | 83.6  | 5.6             | 12.7             | 104.3 | 1.6             | 18.6             | 123.8 |
| 2003–2007       | 9.6             | 34.5             | 87.5  | 1.2             | 41.2             | 73.8  | 5.2             | 12.7             | 105.4 | 0.6             | 13.7             | 100.0 |
| 2008–2012       | 9.8             | 34.5             | 96.9  | 2.2             | 52.6             | 108.3 | 3.4             | 12.6             | 92.6  | 0.2             | 13.1             | 88.0  |
|                 | 15–24           |                  |       | 55–64           |                  |       | 15–24           |                  |       | 55–64           |                  |       |
| 1983–1987       | 1.4             | 20.6             | 147.6 | 1.0             | 33.5             | 78.9  | 0.2             | 6.6              | 96.9  | 1.0             | 19.3             | 97.9  |
| 1988–1992       | 0.6             | 10.9             | 109.8 | 1.4             | 32.4             | 91.2  | 0.0             | 4.5              | 85.1  | 1.2             | 19.2             | 107.3 |
| 1993–1997       | 0.0             | 9.5              | 83.8  | 1.2             | 35.0             | 86.8  | 0.4             | 6.0              | 115.7 | 0.8             | 16.0             | 100.7 |
| 1998–2002       | 0.4             | 14.9             | 94.5  | 1.8             | 54.1             | 85.2  | 0.4             | 7.7              | 109.2 | 0.8             | 18.6             | 98.9  |
| 2003–2007       | 0.8             | 18.8             | 108.0 | 1.6             | 46.3             | 80.2  | 0.4             | 9.8              | 109.0 | 0.4             | 15.2             | 90.8  |
| 2008–2012       | 0.6             | 21.6             | 102.0 | 1.8             | 43.8             | 90.2  | 0.4             | 10.8             | 111.5 | 0.6             | 14.4             | 96.9  |
|                 | 25–34           |                  |       | 65–74           |                  |       | 25–34           |                  |       | 65–74           |                  |       |
| 1983–1987       | 1.2             | 26.6             | 103.9 | 1.8             | 50.3             | 115.0 | 0.4             | 10.5             | 97.4  | 1.0             | 29.1             | 93.1  |
| 1988–1992       | 0.8             | 20.2             | 105.4 | 0.8             | 30.5             | 86.5  | 0.4             | 9.1              | 104.5 | 2.4             | 39.0             | 149.4 |
| 1993–1997       | 0.0             | 14.8             | 75.8  | 1.0             | 28.8             | 90.2  | 0.2             | 8.0              | 96.3  | 0.2             | 13.1             | 67.3  |
| 1998–2002       | 0.8             | 26.4             | 97.6  | 1.0             | 36.5             | 80.3  | 0.2             | 10.9             | 93.9  | 1.6             | 24.8             | 117.9 |
| 2003–2007       | 1.0             | 31.0             | 100.1 | 1.6             | 41.5             | 96.7  | 0.2             | 12.1             | 93.0  | 1.6             | 23.1             | 123.8 |
| 2008–2012       | 1.2             | 34.1             | 104.6 | 0.8             | 33.5             | 84.8  | 0.2             | 13.5             | 94.4  | 0.6             | 17.0             | 95.6  |
|                 | 35–44           |                  |       | >74 y/o         |                  |       | 35–44           |                  |       | >74 y/o         |                  |       |
| 1983–1987       | 1.8             | 33.5             | 105.2 | 1.4             | 75.4             | 96.3  | 1.4             | 15.4             | 130.7 | 2.0             | 67.9             | 117.7 |
| 1988–1992       | 0.4             | 17.7             | 74.8  | 0.8             | 50.3             | 78.0  | 0.2             | 8.7              | 89.8  | 1.0             | 36.6             | 76.4  |
| 1993–1997       | 1.2             | 25.6             | 104.4 | 2.0             | 65.5             | 125.8 | 0.4             | 8.6              | 101.4 | 1.4             | 34.6             | 100.6 |
| 1998–2002       | 1.0             | 32.3             | 91.7  | 2.2             | 62.5             | 118.5 | 0.0             | 8.4              | 81.7  | 1.0             | 24.5             | 78.8  |
| 2003–2007       | 1.8             | 45.6             | 113.8 | 1.6             | 43.9             | 97.4  | 0.2             | 11.6             | 92.2  | 1.8             | 27.2             | 121.4 |
| 2008–2012       | 1.6             | 39.8             | 107.0 | 1.6             | 39.6             | 95.5  | 0.4             | 13.5             | 99.8  | 1.0             | 17.3             | 90.0  |

Secondary Medical Zone ID: 185

|                 | Male            |                  |       |                 |                  |       | Female          |                  |       |                 |                  |       |
|-----------------|-----------------|------------------|-------|-----------------|------------------|-------|-----------------|------------------|-------|-----------------|------------------|-------|
|                 | Suicide         |                  |       | Suicide         |                  |       | Suicide         |                  |       | Suicide         |                  |       |
|                 | Num<br>per year | Rate<br>/100,000 | × 100 | Num<br>per year | Rate<br>/100,000 | × 100 | Num<br>per year | Rate<br>/100,000 | × 100 | Num<br>per year | Rate<br>/100,000 | × 100 |
|                 |                 |                  |       |                 |                  |       |                 |                  |       |                 |                  |       |
| Total (>10 y/o) | 45–54           | Total (>10 y/o)  | 45–54 |                 |                  |       |                 |                  |       |                 |                  |       |
| 1983–1987       | 63.8            | 27.0             | 80.2  | 16.6            | 42.3             | 83.6  | 39.2            | 14.6             | 94.4  | 5.2             | 14.1             | 82.1  |
| 1988–1992       | 56.0            | 21.2             | 83.6  | 12.0            | 27.3             | 79.6  | 34.2            | 11.4             | 86.9  | 6.2             | 14.1             | 96.6  |
| 1993–1997       | 64.6            | 22.1             | 86.4  | 18.0            | 34.8             | 95.1  | 30.6            | 9.5              | 84.8  | 5.8             | 11.8             | 91.7  |
| 1998–2002       | 90.2            | 29.5             | 79.6  | 17.6            | 37.0             | 66.2  | 40.0            | 11.4             | 90.6  | 6.0             | 12.9             | 85.9  |
| 2003–2007       | 109.0           | 33.6             | 91.7  | 22.0            | 49.6             | 88.7  | 35.4            | 10.7             | 83.1  | 5.0             | 12.2             | 88.8  |
| 2008–2012       | 94.8            | 30.2             | 85.4  | 17.8            | 42.7             | 87.8  | 40.4            | 12.1             | 92.9  | 7.6             | 17.4             | 116.8 |
|                 | 15–24           |                  |       | 55–64           |                  |       | 15–24           |                  |       | 55–64           |                  |       |
| 1983–1987       | 6.6             | 14.7             | 105.4 | 8.6             | 33.1             | 78.0  | 2.4             | 5.8              | 85.0  | 5.0             | 16.8             | 85.1  |
| 1988–1992       | 7.4             | 13.3             | 134.6 | 6.8             | 22.0             | 62.0  | 2.8             | 5.6              | 106.3 | 4.0             | 13.0             | 72.6  |
| 1993–1997       | 5.8             | 11.7             | 103.5 | 13.8            | 36.4             | 90.4  | 2.2             | 4.9              | 93.1  | 5.2             | 13.9             | 87.1  |
| 1998–2002       | 5.6             | 13.7             | 86.8  | 22.2            | 52.7             | 82.9  | 1.8             | 5.3              | 76.1  | 7.4             | 17.5             | 92.8  |
| 2003–2007       | 5.0             | 14.0             | 80.5  | 29.4            | 59.4             | 102.8 | 2.2             | 7.0              | 77.9  | 6.0             | 13.5             | 80.4  |
| 2008–2012       | 9.2             | 24.5             | 115.6 | 21.2            | 44.2             | 91.0  | 3.2             | 9.8              | 101.2 | 5.6             | 12.5             | 83.6  |
|                 | 25–34           |                  |       | 65–74           |                  |       | 25–34           |                  |       | 65–74           |                  |       |
| 1983–1987       | 8.2             | 20.2             | 79.1  | 4.2             | 29.8             | 68.1  | 6.0             | 13.3             | 123.1 | 7.6             | 34.0             | 108.7 |
| 1988–1992       | 8.6             | 19.8             | 103.4 | 5.0             | 28.6             | 81.2  | 3.2             | 8.0              | 91.9  | 5.8             | 23.2             | 88.8  |
| 1993–1997       | 9.8             | 20.9             | 107.1 | 5.4             | 23.8             | 74.7  | 3.8             | 8.6              | 103.0 | 3.4             | 12.9             | 66.2  |
| 1998–2002       | 11.8            | 23.9             | 88.4  | 11.2            | 38.8             | 85.2  | 5.4             | 11.6             | 99.8  | 7.2             | 21.2             | 101.1 |
| 2003–2007       | 15.8            | 31.3             | 101.0 | 12.2            | 37.2             | 86.6  | 5.0             | 11.6             | 89.1  | 6.8             | 18.4             | 99.0  |
| 2008–2012       | 10.6            | 26.0             | 79.8  | 12.6            | 34.4             | 87.2  | 4.0             | 11.5             | 80.1  | 7.8             | 18.8             | 105.5 |
|                 | 35–44           |                  |       | >74 y/o         |                  |       | 35–44           |                  |       | >74 y/o         |                  |       |
| 1983–1987       | 12.6            | 24.7             | 77.7  | 6.4             | 72.1             | 92.0  | 4.6             | 9.6              | 81.6  | 8.4             | 61.2             | 106.1 |
| 1988–1992       | 9.0             | 18.4             | 77.7  | 7.2             | 62.1             | 96.3  | 4.4             | 9.0              | 93.7  | 7.8             | 41.4             | 86.5  |
| 1993–1997       | 6.6             | 15.9             | 64.8  | 4.8             | 38.2             | 73.4  | 3.2             | 7.6              | 89.7  | 7.0             | 29.8             | 86.6  |
| 1998–2002       | 13.0            | 30.2             | 85.8  | 8.4             | 52.1             | 98.8  | 3.0             | 8.0              | 77.7  | 9.2             | 31.3             | 100.7 |
| 2003–2007       | 16.6            | 35.8             | 89.3  | 8.0             | 38.6             | 85.8  | 3.4             | 9.2              | 73.1  | 6.8             | 19.3             | 86.0  |
| 2008–2012       | 14.2            | 29.0             | 78.1  | 9.0             | 34.9             | 84.2  | 3.8             | 9.7              | 71.5  | 8.0             | 19.1             | 99.3  |

Secondary Medical Zone ID: 186

|           | Male            |          |       |          |          |       | Female          |          |       |          |          |       |
|-----------|-----------------|----------|-------|----------|----------|-------|-----------------|----------|-------|----------|----------|-------|
|           | Suicide         |          |       | Suicide  |          |       | Suicide         |          |       | Suicide  |          |       |
|           | Num             | Rate     | × 100 | Num      | Rate     | × 100 | Num             | Rate     | × 100 | Num      | Rate     | × 100 |
|           | per year        | /100,000 |       | per year | /100,000 |       | per year        | /100,000 |       | per year | /100,000 |       |
|           | Total (>10 y/o) |          |       | 45–54    |          |       | Total (>10 y/o) |          |       | 45–54    |          |       |
| 1983–1987 | 75.2            | 27.6     | 82.1  | 17.8     | 39.2     | 77.6  | 44.8            | 14.4     | 93.8  | 6.4      | 14.8     | 85.9  |
| 1988–1992 | 62.6            | 20.6     | 81.1  | 15.4     | 29.4     | 85.6  | 41.6            | 11.6     | 90.7  | 5.8      | 12.2     | 83.4  |
| 1993–1997 | 66.0            | 19.9     | 76.5  | 19.2     | 32.3     | 88.4  | 39.4            | 10.0     | 92.3  | 7.8      | 13.1     | 101.7 |
| 1998–2002 | 113.0           | 31.5     | 85.0  | 26.4     | 46.3     | 82.7  | 54.6            | 12.4     | 103.2 | 9.0      | 15.3     | 101.5 |
| 2003–2007 | 114.0           | 31.3     | 82.4  | 21.0     | 42.3     | 75.6  | 48.4            | 11.7     | 93.5  | 6.6      | 13.1     | 95.4  |
| 2008–2012 | 118.4           | 31.2     | 89.6  | 17.6     | 36.4     | 74.9  | 37.0            | 10.1     | 73.8  | 6.0      | 12.8     | 85.9  |
|           | 15–24           |          |       | 55–64    |          |       | 15–24           |          |       | 55–64    |          |       |
| 1983–1987 | 7.0             | 14.1     | 101.3 | 10.0     | 32.3     | 76.1  | 4.6             | 8.5      | 123.8 | 6.6      | 18.4     | 93.0  |
| 1988–1992 | 4.8             | 8.9      | 89.4  | 11.2     | 28.1     | 79.2  | 1.6             | 3.5      | 66.5  | 7.0      | 17.0     | 95.2  |
| 1993–1997 | 5.0             | 9.5      | 84.3  | 12.0     | 28.0     | 69.7  | 1.2             | 3.0      | 57.7  | 6.6      | 14.7     | 92.6  |
| 1998–2002 | 7.0             | 14.8     | 93.8  | 25.2     | 50.1     | 78.8  | 3.2             | 6.8      | 96.9  | 7.2      | 15.2     | 81.0  |
| 2003–2007 | 7.0             | 16.5     | 94.5  | 28.4     | 49.6     | 86.0  | 4.8             | 10.9     | 120.9 | 11.0     | 18.3     | 109.5 |
| 2008–2012 | 9.4             | 22.6     | 106.7 | 23.2     | 42.2     | 86.8  | 1.6             | 5.6      | 57.6  | 5.2      | 10.5     | 70.5  |
|           | 25–34           |          |       | 65–74    |          |       | 25–34           |          |       | 65–74    |          |       |
| 1983–1987 | 11.2            | 24.2     | 94.5  | 7.0      | 39.4     | 90.0  | 5.2             | 10.9     | 101.4 | 6.4      | 26.0     | 83.3  |
| 1988–1992 | 5.8             | 12.8     | 67.0  | 5.4      | 27.3     | 77.4  | 3.2             | 7.2      | 82.9  | 9.8      | 31.9     | 122.2 |
| 1993–1997 | 6.6             | 13.2     | 67.7  | 8.2      | 28.9     | 90.5  | 3.2             | 6.7      | 80.4  | 5.4      | 16.1     | 82.6  |
| 1998–2002 | 15.6            | 26.0     | 96.3  | 13.4     | 38.5     | 84.6  | 4.6             | 8.9      | 76.7  | 11.6     | 27.7     | 131.8 |
| 2003–2007 | 16.6            | 28.4     | 91.7  | 12.6     | 32.7     | 76.1  | 4.6             | 9.4      | 72.0  | 6.8      | 16.3     | 87.3  |
| 2008–2012 | 13.6            | 27.4     | 84.1  | 18.2     | 39.7     | 100.4 | 5.2             | 11.8     | 82.6  | 7.4      | 16.0     | 89.6  |
|           | 35–44           |          |       | >74 y/o  |          |       | 35–44           |          |       | >74 y/o  |          |       |
| 1983–1987 | 15.8            | 26.7     | 83.8  | 5.8      | 58.7     | 75.0  | 5.8             | 10.3     | 86.9  | 9.8      | 61.0     | 105.7 |
| 1988–1992 | 9.6             | 17.4     | 73.6  | 10.0     | 74.4     | 115.3 | 3.8             | 7.4      | 76.4  | 10.4     | 47.0     | 98.2  |
| 1993–1997 | 9.4             | 19.0     | 77.7  | 5.6      | 39.7     | 76.3  | 4.8             | 9.1      | 107.0 | 10.4     | 37.5     | 108.9 |
| 1998–2002 | 18.8            | 36.4     | 103.3 | 6.2      | 36.7     | 69.7  | 4.2             | 8.9      | 85.7  | 14.6     | 42.0     | 135.2 |
| 2003–2007 | 20.6            | 36.6     | 91.3  | 7.8      | 33.2     | 73.8  | 4.8             | 9.9      | 78.1  | 9.8      | 23.4     | 104.3 |
| 2008–2012 | 23.8            | 37.0     | 99.3  | 12.2     | 39.5     | 95.3  | 5.8             | 10.7     | 78.8  | 5.6      | 12.4     | 64.4  |

Secondary Medical Zone ID: 187

|           | Male            |                  |       |                 |                  |       | Female          |                  |       |                 |                  |       |
|-----------|-----------------|------------------|-------|-----------------|------------------|-------|-----------------|------------------|-------|-----------------|------------------|-------|
|           | Suicide         |                  |       | Suicide         |                  |       | Suicide         |                  |       | Suicide         |                  |       |
|           | Num<br>per year | Rate<br>/100,000 | × 100 | Num<br>per year | Rate<br>/100,000 | × 100 | Num<br>per year | Rate<br>/100,000 | × 100 | Num<br>per year | Rate<br>/100,000 | × 100 |
|           |                 |                  |       |                 |                  |       |                 |                  |       |                 |                  |       |
|           | Total (>10 y/o) |                  |       | 45–54           |                  |       | Total (>10 y/o) |                  |       | 45–54           |                  |       |
| 1983–1987 | 51.8            | 30.6             | 91.7  | 12.2            | 44.0             | 87.1  | 29.6            | 14.7             | 93.7  | 4.2             | 15.4             | 89.1  |
| 1988–1992 | 43.4            | 23.2             | 91.5  | 9.2             | 31.0             | 90.1  | 29.0            | 12.4             | 95.9  | 4.4             | 14.4             | 98.5  |
| 1993–1997 | 45.4            | 22.7             | 86.9  | 10.6            | 31.8             | 86.8  | 25.4            | 10.0             | 92.7  | 3.4             | 10.9             | 84.2  |
| 1998–2002 | 64.6            | 30.8             | 82.9  | 16.6            | 49.0             | 87.6  | 36.0            | 13.3             | 107.3 | 5.2             | 14.9             | 98.9  |
| 2003–2007 | 68.4            | 32.1             | 86.4  | 13.0            | 44.4             | 79.4  | 25.4            | 11.1             | 83.0  | 2.4             | 10.0             | 72.7  |
| 2008–2012 | 64.4            | 31.2             | 88.9  | 12.2            | 46.0             | 94.6  | 28.2            | 12.3             | 92.3  | 4.2             | 14.9             | 99.7  |
|           | 15–24           |                  |       | 55–64           |                  |       | 15–24           |                  |       | 55–64           |                  |       |
| 1983–1987 | 3.8             | 14.7             | 105.4 | 6.6             | 32.2             | 75.8  | 2.2             | 7.7              | 112.6 | 4.0             | 16.7             | 84.5  |
| 1988–1992 | 4.0             | 11.7             | 118.1 | 6.2             | 25.0             | 70.3  | 1.2             | 4.5              | 85.6  | 5.6             | 18.9             | 105.8 |
| 1993–1997 | 3.6             | 11.2             | 99.3  | 9.4             | 34.4             | 85.4  | 1.0             | 4.0              | 77.4  | 5.2             | 16.9             | 106.2 |
| 1998–2002 | 4.0             | 14.6             | 92.6  | 15.8            | 54.2             | 85.4  | 2.8             | 8.7              | 124.3 | 6.6             | 20.2             | 107.1 |
| 2003–2007 | 4.0             | 16.4             | 94.0  | 16.0            | 49.3             | 85.5  | 2.0             | 8.5              | 94.6  | 4.0             | 13.4             | 79.9  |
| 2008–2012 | 2.8             | 15.7             | 74.1  | 15.0            | 45.5             | 93.7  | 2.6             | 11.2             | 115.2 | 6.0             | 16.3             | 109.1 |
|           | 25–34           |                  |       | 65–74           |                  |       | 25–34           |                  |       | 65–74           |                  |       |
| 1983–1987 | 7.2             | 27.4             | 107.2 | 2.8             | 27.1             | 62.0  | 4.4             | 14.3             | 132.6 | 4.2             | 24.7             | 78.9  |
| 1988–1992 | 5.6             | 21.2             | 111.1 | 4.8             | 32.7             | 92.7  | 2.4             | 8.8              | 102.0 | 5.6             | 26.2             | 100.4 |
| 1993–1997 | 7.2             | 24.7             | 126.6 | 4.2             | 22.9             | 71.9  | 2.2             | 8.1              | 96.8  | 4.8             | 19.1             | 98.2  |
| 1998–2002 | 6.0             | 22.4             | 83.1  | 9.4             | 39.7             | 87.2  | 4.0             | 12.8             | 110.7 | 6.2             | 21.9             | 104.2 |
| 2003–2007 | 7.8             | 27.9             | 90.1  | 10.6            | 41.5             | 96.7  | 2.8             | 11.1             | 85.1  | 3.4             | 13.7             | 73.7  |
| 2008–2012 | 6.8             | 28.7             | 88.2  | 8.4             | 33.2             | 84.1  | 2.8             | 12.7             | 88.7  | 4.4             | 15.7             | 88.4  |
|           | 35–44           |                  |       | >74 y/o         |                  |       | 35–44           |                  |       | >74 y/o         |                  |       |
| 1983–1987 | 11.6            | 34.4             | 108.2 | 7.6             | 90.9             | 116.1 | 4.0             | 11.8             | 100.2 | 6.4             | 52.6             | 91.1  |
| 1988–1992 | 8.4             | 24.6             | 103.7 | 5.0             | 54.4             | 84.4  | 3.2             | 9.5              | 97.9  | 6.4             | 39.9             | 83.3  |
| 1993–1997 | 5.8             | 19.9             | 81.3  | 4.4             | 42.8             | 82.1  | 2.0             | 7.1              | 83.9  | 6.8             | 34.3             | 99.8  |
| 1998–2002 | 8.0             | 29.6             | 84.2  | 4.8             | 39.8             | 75.6  | 2.6             | 9.4              | 91.1  | 8.4             | 33.8             | 108.9 |
| 2003–2007 | 9.6             | 35.4             | 88.5  | 7.4             | 42.1             | 93.5  | 4.0             | 13.5             | 106.9 | 6.8             | 22.4             | 99.8  |
| 2008–2012 | 9.6             | 33.9             | 91.1  | 9.6             | 43.2             | 104.1 | 2.8             | 11.2             | 82.8  | 5.4             | 15.9             | 82.8  |

Secondary Medical Zone ID: 188

|           | Male            |          |       |          |          |       | Female          |          |       |          |          |       |
|-----------|-----------------|----------|-------|----------|----------|-------|-----------------|----------|-------|----------|----------|-------|
|           | Suicide         |          |       | Suicide  |          |       | Suicide         |          |       | Suicide  |          |       |
|           | Num             | Rate     | × 100 | Num      | Rate     | × 100 | Num             | Rate     | × 100 | Num      | Rate     | × 100 |
|           | per year        | /100,000 |       | per year | /100,000 |       | per year        | /100,000 |       | per year | /100,000 |       |
|           | Total (>10 y/o) |          |       | 45–54    |          |       | Total (>10 y/o) |          |       | 45–54    |          |       |
| 1983–1987 | 59.4            | 29.9     | 88.7  | 13.2     | 40.4     | 79.9  | 33.6            | 13.6     | 86.9  | 4.4      | 13.6     | 78.9  |
| 1988–1992 | 45.4            | 21.9     | 85.5  | 9.2      | 29.0     | 84.4  | 36.6            | 12.8     | 101.9 | 6.8      | 17.6     | 120.0 |
| 1993–1997 | 48.0            | 21.9     | 85.4  | 10.4     | 30.8     | 84.2  | 33.8            | 10.8     | 106.7 | 5.2      | 13.7     | 106.0 |
| 1998–2002 | 79.2            | 34.6     | 95.5  | 18.8     | 53.6     | 95.7  | 34.6            | 11.4     | 95.3  | 3.8      | 12.1     | 80.5  |
| 2003–2007 | 78.2            | 34.8     | 94.4  | 18.0     | 57.4     | 102.6 | 32.8            | 11.9     | 96.0  | 5.6      | 16.0     | 116.7 |
| 2008–2012 | 74.6            | 35.7     | 99.1  | 14.6     | 50.6     | 104.2 | 32.2            | 12.9     | 97.5  | 3.4      | 12.6     | 84.3  |
|           | 15–24           |          |       | 55–64    |          |       | 15–24           |          |       | 55–64    |          |       |
| 1983–1987 | 3.6             | 12.9     | 92.1  | 8.0      | 31.4     | 73.8  | 1.8             | 6.2      | 90.3  | 4.8      | 15.9     | 80.8  |
| 1988–1992 | 2.4             | 8.8      | 88.8  | 8.4      | 27.2     | 76.7  | 1.8             | 5.5      | 104.6 | 3.6      | 12.3     | 68.9  |
| 1993–1997 | 3.2             | 11.1     | 97.9  | 10.8     | 34.6     | 86.1  | 2.0             | 6.0      | 115.8 | 5.6      | 15.8     | 99.6  |
| 1998–2002 | 3.0             | 13.2     | 83.4  | 20.0     | 63.0     | 99.2  | 1.2             | 5.7      | 81.3  | 6.8      | 19.2     | 102.1 |
| 2003–2007 | 3.4             | 15.9     | 91.3  | 16.6     | 49.8     | 86.3  | 1.6             | 7.8      | 86.5  | 6.2      | 16.9     | 100.9 |
| 2008–2012 | 6.8             | 29.0     | 136.9 | 15.2     | 45.1     | 92.8  | 2.4             | 11.2     | 115.0 | 4.6      | 13.6     | 90.9  |
|           | 25–34           |          |       | 65–74    |          |       | 25–34           |          |       | 65–74    |          |       |
| 1983–1987 | 9.8             | 31.2     | 122.1 | 5.8      | 37.8     | 86.4  | 3.2             | 10.3     | 95.3  | 5.6      | 25.8     | 82.4  |
| 1988–1992 | 4.8             | 17.7     | 92.8  | 3.8      | 24.2     | 68.6  | 2.2             | 7.9      | 90.6  | 7.4      | 28.0     | 107.4 |
| 1993–1997 | 5.2             | 18.9     | 96.7  | 6.8      | 28.9     | 90.6  | 1.8             | 7.0      | 83.5  | 6.2      | 20.2     | 103.4 |
| 1998–2002 | 8.4             | 28.5     | 105.6 | 11.4     | 40.9     | 89.9  | 3.0             | 10.6     | 91.3  | 6.2      | 19.1     | 91.1  |
| 2003–2007 | 8.0             | 29.2     | 94.1  | 9.2      | 33.9     | 79.1  | 2.6             | 10.6     | 81.8  | 7.2      | 20.7     | 111.4 |
| 2008–2012 | 8.0             | 33.8     | 103.7 | 9.6      | 35.3     | 89.3  | 2.6             | 12.5     | 87.3  | 4.6      | 15.2     | 85.3  |
|           | 35–44           |          |       | >74 y/o  |          |       | 35–44           |          |       | >74 y/o  |          |       |
| 1983–1987 | 11.6            | 32.0     | 100.6 | 7.2      | 70.8     | 90.4  | 4.4             | 11.8     | 99.7  | 9.4      | 58.4     | 101.3 |
| 1988–1992 | 8.6             | 24.2     | 102.0 | 8.0      | 67.0     | 103.8 | 3.0             | 8.8      | 91.2  | 11.8     | 57.6     | 120.3 |
| 1993–1997 | 5.2             | 18.0     | 73.4  | 6.4      | 50.0     | 96.0  | 1.6             | 6.2      | 72.4  | 11.4     | 46.7     | 135.8 |
| 1998–2002 | 10.2            | 34.9     | 99.2  | 7.4      | 48.9     | 92.8  | 2.0             | 7.9      | 76.2  | 11.6     | 39.1     | 126.0 |
| 2003–2007 | 11.2            | 38.8     | 96.8  | 11.8     | 55.0     | 122.2 | 2.4             | 9.7      | 76.9  | 7.2      | 20.3     | 90.6  |
| 2008–2012 | 12.2            | 40.1     | 107.7 | 8.2      | 33.3     | 80.4  | 5.2             | 15.6     | 115.3 | 9.2      | 21.6     | 112.4 |

Secondary Medical Zone ID: 189

|           | Male            |                  |       |                 |                  |       | Female          |                  |       |                 |                  |       |
|-----------|-----------------|------------------|-------|-----------------|------------------|-------|-----------------|------------------|-------|-----------------|------------------|-------|
|           | Suicide         |                  |       | Suicide         |                  |       | Suicide         |                  |       | Suicide         |                  |       |
|           | Num<br>per year | Rate<br>/100,000 | × 100 | Num<br>per year | Rate<br>/100,000 | × 100 | Num<br>per year | Rate<br>/100,000 | × 100 | Num<br>per year | Rate<br>/100,000 | × 100 |
|           |                 |                  |       |                 |                  |       |                 |                  |       |                 |                  |       |
|           | Total (>10 y/o) |                  |       | 45–54           |                  |       | Total (>10 y/o) |                  |       | 45–54           |                  |       |
| 1983–1987 | 12.6            | 30.6             | 88.4  | 3.2             | 46.1             | 91.1  | 5.8             | 13.1             | 75.9  | 1.4             | 17.6             | 102.0 |
| 1988–1992 | 11.0            | 24.3             | 97.2  | 2.4             | 34.9             | 101.7 | 4.6             | 10.8             | 70.6  | 0.8             | 13.6             | 92.9  |
| 1993–1997 | 11.6            | 25.1             | 100.7 | 2.0             | 33.7             | 92.0  | 6.8             | 10.8             | 99.7  | 1.4             | 14.6             | 113.0 |
| 1998–2002 | 19.0            | 37.8             | 113.9 | 3.2             | 52.5             | 93.9  | 6.0             | 12.0             | 88.0  | 1.0             | 15.0             | 99.6  |
| 2003–2007 | 20.0            | 39.6             | 125.3 | 3.6             | 60.9             | 108.9 | 7.8             | 13.3             | 109.5 | 1.2             | 15.5             | 113.2 |
| 2008–2012 | 16.8            | 37.6             | 118.2 | 4.2             | 64.5             | 132.7 | 5.2             | 12.6             | 94.3  | 1.0             | 16.3             | 109.1 |
|           | 15–24           |                  |       | 55–64           |                  |       | 15–24           |                  |       | 55–64           |                  |       |
| 1983–1987 | 0.6             | 13.4             | 96.1  | 2.6             | 41.0             | 96.5  | 0.0             | 5.4              | 79.1  | 1.4             | 19.0             | 96.1  |
| 1988–1992 | 0.0             | 8.0              | 80.7  | 3.0             | 38.4             | 108.2 | 0.0             | 4.3              | 81.6  | 0.8             | 15.0             | 84.1  |
| 1993–1997 | 0.2             | 10.1             | 89.0  | 3.4             | 44.7             | 111.0 | 0.2             | 5.1              | 98.7  | 1.6             | 17.9             | 112.7 |
| 1998–2002 | 0.6             | 15.9             | 100.6 | 5.2             | 72.7             | 114.4 | 0.2             | 6.9              | 97.7  | 1.6             | 19.8             | 105.0 |
| 2003–2007 | 0.4             | 16.6             | 95.1  | 5.2             | 69.4             | 120.2 | 0.2             | 8.7              | 96.4  | 2.0             | 19.6             | 117.3 |
| 2008–2012 | 1.0             | 24.2             | 113.9 | 3.0             | 47.9             | 98.5  | 0.2             | 9.5              | 98.4  | 0.6             | 13.5             | 90.3  |
|           | 25–34           |                  |       | 65–74           |                  |       | 25–34           |                  |       | 65–74           |                  |       |
| 1983–1987 | 1.8             | 28.2             | 110.4 | 1.0             | 33.7             | 77.0  | 0.2             | 8.6              | 80.2  | 1.2             | 25.3             | 81.0  |
| 1988–1992 | 0.8             | 18.5             | 96.6  | 1.4             | 33.0             | 93.6  | 0.2             | 7.6              | 87.7  | 0.8             | 18.2             | 69.6  |
| 1993–1997 | 0.8             | 19.3             | 99.0  | 1.8             | 31.9             | 100.0 | 0.0             | 6.7              | 80.7  | 1.2             | 17.9             | 91.9  |
| 1998–2002 | 1.0             | 26.3             | 97.4  | 3.8             | 52.5             | 115.3 | 0.6             | 11.9             | 103.0 | 1.6             | 21.3             | 101.2 |
| 2003–2007 | 0.4             | 25.1             | 81.0  | 5.4             | 65.7             | 153.2 | 1.0             | 15.4             | 118.1 | 1.0             | 16.8             | 90.3  |
| 2008–2012 | 1.0             | 32.7             | 100.5 | 2.6             | 41.8             | 105.8 | 0.0             | 12.2             | 85.5  | 1.8             | 20.4             | 114.4 |
|           | 35–44           |                  |       | >74 y/o         |                  |       | 35–44           |                  |       | >74 y/o         |                  |       |
| 1983–1987 | 2.2             | 31.3             | 98.2  | 1.2             | 60.8             | 77.6  | 0.2             | 9.1              | 77.3  | 1.2             | 38.0             | 65.8  |
| 1988–1992 | 1.8             | 25.2             | 106.3 | 1.6             | 57.6             | 89.2  | 0.2             | 8.0              | 83.2  | 1.8             | 38.4             | 80.3  |
| 1993–1997 | 1.6             | 26.2             | 106.9 | 1.8             | 52.7             | 101.3 | 0.4             | 8.1              | 95.5  | 2.0             | 32.9             | 95.6  |
| 1998–2002 | 2.4             | 41.3             | 117.2 | 2.8             | 63.8             | 121.0 | 0.2             | 8.9              | 85.6  | 0.8             | 16.8             | 54.2  |
| 2003–2007 | 2.4             | 46.7             | 116.5 | 2.6             | 50.0             | 111.0 | 0.6             | 12.7             | 100.3 | 1.8             | 21.5             | 95.9  |
| 2008–2012 | 2.0             | 39.8             | 107.1 | 3.0             | 47.7             | 115.0 | 0.6             | 13.6             | 100.7 | 1.0             | 14.3             | 74.2  |

Secondary Medical Zone ID: 190

|                 | Male            |                  |       |                 |                  |       | Female          |                  |       |                 |                  |       |
|-----------------|-----------------|------------------|-------|-----------------|------------------|-------|-----------------|------------------|-------|-----------------|------------------|-------|
|                 | Suicide         |                  |       | Suicide         |                  |       | Suicide         |                  |       | Suicide         |                  |       |
|                 | Num<br>per year | Rate<br>/100,000 | × 100 | Num<br>per year | Rate<br>/100,000 | × 100 | Num<br>per year | Rate<br>/100,000 | × 100 | Num<br>per year | Rate<br>/100,000 | × 100 |
|                 |                 |                  |       |                 |                  |       |                 |                  |       |                 |                  |       |
| Total (>10 y/o) | 45–54           | Total (>10 y/o)  | 45–54 |                 |                  |       |                 |                  |       |                 |                  |       |
| 1983–1987       | 25.6            | 28.9             | 84.1  | 5.2             | 37.3             | 73.8  | 17.4            | 15.9             | 105.8 | 3.4             | 19.6             | 113.9 |
| 1988–1992       | 25.0            | 23.2             | 91.9  | 6.4             | 34.2             | 99.5  | 16.4            | 12.6             | 100.2 | 2.8             | 14.8             | 101.6 |
| 1993–1997       | 26.8            | 22.0             | 85.7  | 7.0             | 32.6             | 89.1  | 14.2            | 10.4             | 91.6  | 2.6             | 12.1             | 93.6  |
| 1998–2002       | 39.4            | 30.5             | 80.4  | 8.8             | 42.2             | 75.5  | 19.6            | 12.2             | 97.5  | 3.4             | 14.7             | 97.6  |
| 2003–2007       | 49.2            | 33.6             | 92.0  | 10.2            | 50.3             | 90.0  | 18.8            | 12.1             | 92.0  | 2.6             | 12.8             | 93.4  |
| 2008–2012       | 49.0            | 33.6             | 94.6  | 9.0             | 45.3             | 93.1  | 23.4            | 13.8             | 104.7 | 3.4             | 15.5             | 103.6 |
|                 | 15–24           |                  |       | 55–64           |                  |       | 15–24           |                  |       | 55–64           |                  |       |
| 1983–1987       | 2.0             | 12.4             | 88.8  | 3.2             | 33.9             | 79.8  | 2.2             | 9.4              | 137.4 | 1.8             | 17.2             | 87.2  |
| 1988–1992       | 3.2             | 12.7             | 127.9 | 4.0             | 30.1             | 84.8  | 1.0             | 5.0              | 94.8  | 3.4             | 20.6             | 115.1 |
| 1993–1997       | 3.4             | 13.5             | 119.3 | 7.6             | 44.9             | 111.6 | 0.8             | 4.4              | 84.3  | 3.6             | 19.2             | 120.9 |
| 1998–2002       | 3.2             | 15.7             | 99.4  | 9.2             | 52.4             | 82.4  | 1.2             | 6.4              | 91.8  | 2.2             | 14.9             | 79.1  |
| 2003–2007       | 3.0             | 16.4             | 94.1  | 14.0            | 61.6             | 106.7 | 2.2             | 10.5             | 116.6 | 4.0             | 17.0             | 101.3 |
| 2008–2012       | 3.4             | 20.1             | 94.9  | 10.0            | 44.9             | 92.4  | 2.8             | 13.3             | 136.9 | 3.6             | 14.8             | 99.4  |
|                 | 25–34           |                  |       | 65–74           |                  |       | 25–34           |                  |       | 65–74           |                  |       |
| 1983–1987       | 3.0             | 20.9             | 81.6  | 3.6             | 54.3             | 123.9 | 1.2             | 8.9              | 82.5  | 3.0             | 34.4             | 110.2 |
| 1988–1992       | 2.8             | 16.9             | 88.7  | 2.8             | 37.3             | 106.0 | 2.0             | 9.8              | 113.3 | 1.8             | 20.9             | 80.1  |
| 1993–1997       | 2.8             | 16.4             | 83.8  | 3.0             | 30.0             | 94.0  | 2.8             | 11.1             | 133.9 | 1.6             | 15.3             | 78.6  |
| 1998–2002       | 4.4             | 23.0             | 85.1  | 5.2             | 41.5             | 91.3  | 2.8             | 12.1             | 104.6 | 3.4             | 22.4             | 106.5 |
| 2003–2007       | 6.0             | 28.8             | 92.9  | 5.6             | 39.1             | 91.0  | 2.8             | 12.7             | 97.9  | 2.2             | 15.5             | 83.4  |
| 2008–2012       | 6.6             | 34.0             | 104.3 | 6.6             | 38.4             | 97.3  | 2.8             | 14.2             | 98.9  | 3.8             | 19.1             | 107.1 |
|                 | 35–44           |                  |       | >74 y/o         |                  |       | 35–44           |                  |       | >74 y/o         |                  |       |
| 1983–1987       | 6.8             | 32.0             | 100.5 | 1.6             | 59.5             | 75.9  | 1.8             | 9.9              | 84.1  | 4.0             | 73.0             | 126.6 |
| 1988–1992       | 3.2             | 17.1             | 72.3  | 2.6             | 61.5             | 95.3  | 2.2             | 9.7              | 100.7 | 3.2             | 44.3             | 92.6  |
| 1993–1997       | 1.2             | 10.9             | 44.5  | 1.8             | 40.7             | 78.1  | 1.4             | 7.6              | 88.8  | 1.2             | 17.2             | 50.1  |
| 1998–2002       | 4.8             | 26.8             | 76.0  | 3.8             | 56.2             | 106.7 | 2.2             | 10.5             | 101.1 | 4.4             | 35.4             | 113.9 |
| 2003–2007       | 5.8             | 29.6             | 73.8  | 4.6             | 47.9             | 106.3 | 2.2             | 11.1             | 87.7  | 2.8             | 18.8             | 83.7  |
| 2008–2012       | 9.2             | 37.7             | 101.4 | 4.0             | 35.0             | 84.3  | 4.4             | 15.7             | 115.6 | 2.6             | 14.9             | 77.4  |

Secondary Medical Zone ID: 191

|                 | Male            |                  |       |                 |                  |       | Female          |                  |       |                 |                  |       |
|-----------------|-----------------|------------------|-------|-----------------|------------------|-------|-----------------|------------------|-------|-----------------|------------------|-------|
|                 | Suicide         |                  |       | Suicide         |                  |       | Suicide         |                  |       | Suicide         |                  |       |
|                 | Num<br>per year | Rate<br>/100,000 | × 100 | Num<br>per year | Rate<br>/100,000 | × 100 | Num<br>per year | Rate<br>/100,000 | × 100 | Num<br>per year | Rate<br>/100,000 | × 100 |
|                 |                 |                  |       |                 |                  |       |                 |                  |       |                 |                  |       |
| Total (>10 y/o) | 45–54           | Total (>10 y/o)  | 45–54 |                 |                  |       |                 |                  |       |                 |                  |       |
| 1983–1987       | 21.8            | 29.0             | 81.5  | 3.8             | 33.3             | 65.8  | 12.0            | 14.6             | 92.1  | 1.4             | 14.4             | 83.8  |
| 1988–1992       | 20.4            | 22.5             | 87.2  | 4.2             | 26.8             | 78.0  | 12.6            | 12.5             | 96.4  | 2.8             | 16.0             | 109.5 |
| 1993–1997       | 21.6            | 21.7             | 79.4  | 5.6             | 29.9             | 81.7  | 11.8            | 10.3             | 93.6  | 2.6             | 13.0             | 100.3 |
| 1998–2002       | 35.6            | 30.5             | 79.4  | 7.4             | 40.9             | 73.0  | 16.2            | 12.2             | 96.5  | 2.2             | 12.8             | 84.8  |
| 2003–2007       | 40.4            | 31.8             | 81.8  | 10.2            | 57.0             | 101.9 | 16.4            | 12.0             | 93.2  | 3.4             | 16.2             | 118.4 |
| 2008–2012       | 39.4            | 29.9             | 81.9  | 7.0             | 42.2             | 86.8  | 15.4            | 11.5             | 86.0  | 2.0             | 13.2             | 88.5  |
|                 | 15–24           |                  |       | 55–64           |                  |       | 15–24           |                  |       | 55–64           |                  |       |
| 1983–1987       | 1.6             | 11.8             | 84.7  | 2.8             | 36.8             | 86.6  | 0.6             | 5.7              | 83.1  | 1.6             | 18.6             | 94.3  |
| 1988–1992       | 1.4             | 8.6              | 87.1  | 3.6             | 33.0             | 92.8  | 0.6             | 4.3              | 81.0  | 1.4             | 15.5             | 87.0  |
| 1993–1997       | 1.2             | 8.1              | 71.8  | 4.8             | 36.8             | 91.3  | 0.6             | 4.1              | 78.4  | 2.2             | 16.6             | 104.3 |
| 1998–2002       | 2.4             | 12.3             | 78.1  | 8.4             | 52.8             | 83.1  | 2.2             | 9.0              | 128.3 | 2.4             | 17.0             | 90.6  |
| 2003–2007       | 3.2             | 15.5             | 89.0  | 7.0             | 39.9             | 69.1  | 1.2             | 7.9              | 87.9  | 1.8             | 12.8             | 76.6  |
| 2008–2012       | 3.4             | 18.3             | 86.1  | 7.2             | 40.1             | 82.5  | 1.0             | 7.8              | 80.9  | 3.0             | 14.6             | 97.7  |
|                 | 25–34           |                  |       | 65–74           |                  |       | 25–34           |                  |       | 65–74           |                  |       |
| 1983–1987       | 3.4             | 22.5             | 87.9  | 2.0             | 44.1             | 100.7 | 0.6             | 7.1              | 65.6  | 2.8             | 38.1             | 122.0 |
| 1988–1992       | 2.8             | 17.7             | 92.9  | 2.2             | 37.8             | 107.2 | 0.6             | 6.4              | 73.6  | 2.0             | 26.4             | 101.3 |
| 1993–1997       | 2.8             | 16.3             | 83.4  | 2.2             | 30.0             | 94.0  | 1.0             | 7.0              | 83.9  | 2.4             | 23.4             | 120.3 |
| 1998–2002       | 4.2             | 20.6             | 76.4  | 5.2             | 49.3             | 108.4 | 2.8             | 12.0             | 103.2 | 2.8             | 23.8             | 113.3 |
| 2003–2007       | 5.4             | 24.2             | 78.2  | 5.0             | 41.4             | 96.4  | 2.0             | 10.3             | 79.0  | 2.6             | 19.8             | 106.4 |
| 2008–2012       | 4.8             | 25.8             | 79.1  | 3.0             | 26.5             | 67.1  | 2.4             | 12.6             | 87.6  | 2.6             | 17.5             | 98.4  |
|                 | 35–44           |                  |       | >74 y/o         |                  |       | 35–44           |                  |       | >74 y/o         |                  |       |
| 1983–1987       | 5.6             | 27.9             | 87.7  | 2.6             | 95.2             | 121.6 | 2.4             | 11.8             | 100.3 | 2.6             | 64.0             | 110.9 |
| 1988–1992       | 4.6             | 22.9             | 96.7  | 1.2             | 49.2             | 76.3  | 2.0             | 9.7              | 100.7 | 3.2             | 55.8             | 116.7 |
| 1993–1997       | 3.8             | 22.3             | 91.1  | 1.2             | 40.2             | 77.2  | 0.8             | 6.5              | 76.3  | 2.2             | 32.4             | 94.3  |
| 1998–2002       | 5.4             | 31.4             | 89.2  | 2.6             | 54.2             | 102.8 | 0.6             | 6.8              | 66.2  | 3.2             | 35.0             | 112.6 |
| 2003–2007       | 7.0             | 34.3             | 85.6  | 2.6             | 40.8             | 90.6  | 2.2             | 11.7             | 92.6  | 3.2             | 26.6             | 118.4 |
| 2008–2012       | 8.4             | 33.8             | 91.0  | 5.6             | 54.8             | 132.1 | 1.8             | 10.0             | 74.0  | 2.4             | 18.0             | 93.7  |



Secondary Medical Zone ID: 192

|                 | Male            |                  |       |                 |                  |       | Female          |                  |       |                 |                  |       |
|-----------------|-----------------|------------------|-------|-----------------|------------------|-------|-----------------|------------------|-------|-----------------|------------------|-------|
|                 | Suicide         |                  |       | Suicide         |                  |       | Suicide         |                  |       | Suicide         |                  |       |
|                 | Num<br>per year | Rate<br>/100,000 | × 100 | Num<br>per year | Rate<br>/100,000 | × 100 | Num<br>per year | Rate<br>/100,000 | × 100 | Num<br>per year | Rate<br>/100,000 | × 100 |
|                 |                 |                  |       |                 |                  |       |                 |                  |       |                 |                  |       |
| Total (>10 y/o) | 45–54           | Total (>10 y/o)  | 45–54 |                 |                  |       |                 |                  |       |                 |                  |       |
| 1983–1987       | 18.0            | 35.0             | 114.3 | 4.4             | 56.2             | 111.2 | 9.8             | 16.7             | 114.8 | 1.2             | 17.2             | 100.0 |
| 1988–1992       | 13.4            | 24.4             | 101.5 | 2.0             | 28.2             | 82.1  | 8.0             | 13.0             | 102.4 | 1.2             | 14.8             | 101.1 |
| 1993–1997       | 14.8            | 24.5             | 97.1  | 4.2             | 38.0             | 104.0 | 9.2             | 11.5             | 116.5 | 1.8             | 14.8             | 114.8 |
| 1998–2002       | 21.8            | 34.3             | 93.2  | 5.8             | 53.1             | 94.9  | 8.6             | 12.1             | 96.3  | 0.8             | 12.5             | 82.9  |
| 2003–2007       | 21.4            | 32.8             | 87.5  | 3.4             | 40.0             | 71.5  | 9.8             | 13.0             | 104.5 | 0.8             | 11.8             | 86.1  |
| 2008–2012       | 26.8            | 35.7             | 111.2 | 4.8             | 51.3             | 105.5 | 11.2            | 13.8             | 112.1 | 0.8             | 12.7             | 85.4  |
|                 | 15–24           |                  |       | 55–64           |                  |       | 15–24           |                  |       | 55–64           |                  |       |
| 1983–1987       | 0.8             | 12.8             | 91.6  | 3.8             | 54.3             | 127.9 | 0.4             | 6.6              | 96.3  | 1.8             | 22.9             | 116.2 |
| 1988–1992       | 1.0             | 10.2             | 103.3 | 2.6             | 36.5             | 102.8 | 0.6             | 5.8              | 110.2 | 0.6             | 14.7             | 82.3  |
| 1993–1997       | 0.8             | 10.1             | 89.7  | 3.8             | 45.4             | 112.8 | 0.4             | 4.9              | 94.3  | 1.2             | 16.0             | 100.7 |
| 1998–2002       | 1.6             | 16.3             | 103.1 | 4.8             | 59.4             | 93.4  | 0.2             | 5.6              | 79.7  | 1.8             | 19.9             | 105.7 |
| 2003–2007       | 2.2             | 20.2             | 116.1 | 4.8             | 50.6             | 87.7  | 1.6             | 12.6             | 139.8 | 1.8             | 17.4             | 103.6 |
| 2008–2012       | 1.6             | 20.7             | 97.5  | 6.2             | 53.0             | 109.1 | 1.2             | 11.9             | 122.6 | 2.0             | 16.4             | 109.9 |
|                 | 25–34           |                  |       | 65–74           |                  |       | 25–34           |                  |       | 65–74           |                  |       |
| 1983–1987       | 1.6             | 22.6             | 88.2  | 1.4             | 43.8             | 100.2 | 0.2             | 7.9              | 73.0  | 2.2             | 39.7             | 127.1 |
| 1988–1992       | 1.2             | 16.8             | 88.1  | 1.6             | 38.5             | 109.3 | 0.8             | 9.1              | 104.4 | 1.4             | 26.6             | 102.0 |
| 1993–1997       | 1.0             | 15.4             | 78.9  | 1.6             | 31.7             | 99.3  | 0.6             | 7.9              | 94.8  | 2.6             | 30.1             | 154.3 |
| 1998–2002       | 2.8             | 26.9             | 99.6  | 2.2             | 40.8             | 89.8  | 0.6             | 9.9              | 85.7  | 1.2             | 19.5             | 92.9  |
| 2003–2007       | 2.4             | 26.5             | 85.6  | 3.2             | 45.8             | 106.7 | 1.4             | 13.6             | 104.9 | 1.8             | 21.1             | 113.5 |
| 2008–2012       | 3.0             | 32.7             | 100.3 | 4.2             | 48.0             | 121.4 | 1.0             | 13.6             | 95.1  | 1.8             | 19.8             | 111.0 |
|                 | 35–44           |                  |       | >74 y/o         |                  |       | 35–44           |                  |       | >74 y/o         |                  |       |
| 1983–1987       | 4.0             | 36.6             | 115.0 | 2.0             | 93.8             | 119.7 | 0.6             | 10.1             | 85.4  | 3.4             | 94.5             | 163.8 |
| 1988–1992       | 2.6             | 24.0             | 101.1 | 2.2             | 82.3             | 127.6 | 0.6             | 8.5              | 88.1  | 2.8             | 64.2             | 134.1 |
| 1993–1997       | 2.2             | 22.8             | 92.9  | 1.2             | 49.5             | 95.1  | 0.4             | 6.9              | 81.4  | 2.2             | 41.7             | 121.1 |
| 1998–2002       | 3.2             | 34.4             | 97.6  | 1.4             | 48.7             | 92.3  | 1.2             | 11.3             | 108.9 | 2.8             | 40.7             | 131.2 |
| 2003–2007       | 2.8             | 33.2             | 82.8  | 2.6             | 53.2             | 118.0 | 0.8             | 11.4             | 90.4  | 1.6             | 21.5             | 96.0  |
| 2008–2012       | 4.0             | 38.1             | 102.5 | 3.0             | 49.0             | 118.1 | 2.0             | 16.1             | 118.6 | 2.4             | 23.5             | 122.4 |

Secondary Medical Zone ID: 193

|                 | Male            |                  |       |                 |                  |       | Female          |                  |       |                 |                  |       |
|-----------------|-----------------|------------------|-------|-----------------|------------------|-------|-----------------|------------------|-------|-----------------|------------------|-------|
|                 | Suicide         |                  |       | Suicide         |                  |       | Suicide         |                  |       | Suicide         |                  |       |
|                 | Num<br>per year | Rate<br>/100,000 | × 100 | Num<br>per year | Rate<br>/100,000 | × 100 | Num<br>per year | Rate<br>/100,000 | × 100 | Num<br>per year | Rate<br>/100,000 | × 100 |
|                 |                 |                  |       |                 |                  |       |                 |                  |       |                 |                  |       |
| Total (>10 y/o) | 45–54           | Total (>10 y/o)  | 45–54 |                 |                  |       |                 |                  |       |                 |                  |       |
| 1983–1987       | 23.6            | 30.2             | 88.1  | 5.4             | 44.7             | 88.3  | 14.8            | 15.2             | 98.5  | 2.2             | 17.3             | 100.5 |
| 1988–1992       | 22.0            | 23.9             | 97.2  | 3.4             | 27.4             | 79.8  | 12.6            | 12.1             | 91.2  | 2.6             | 16.5             | 113.1 |
| 1993–1997       | 27.8            | 26.2             | 109.0 | 6.8             | 39.1             | 106.8 | 14.0            | 10.8             | 106.9 | 2.4             | 13.9             | 108.0 |
| 1998–2002       | 30.6            | 31.7             | 82.5  | 6.4             | 42.0             | 75.0  | 13.6            | 11.7             | 91.0  | 2.2             | 14.2             | 94.2  |
| 2003–2007       | 40.0            | 36.6             | 101.3 | 9.0             | 58.3             | 104.3 | 16.4            | 12.4             | 106.4 | 2.6             | 15.3             | 111.4 |
| 2008–2012       | 41.2            | 36.4             | 109.6 | 7.0             | 50.6             | 104.1 | 16.0            | 12.6             | 104.5 | 2.6             | 16.8             | 112.3 |
|                 | 15–24           |                  |       | 55–64           |                  |       | 15–24           |                  |       | 55–64           |                  |       |
| 1983–1987       | 1.4             | 12.1             | 86.6  | 3.0             | 33.8             | 79.5  | 0.4             | 5.3              | 78.3  | 2.4             | 19.7             | 100.0 |
| 1988–1992       | 1.6             | 10.1             | 102.3 | 5.6             | 42.2             | 119.0 | 1.2             | 6.4              | 121.9 | 2.4             | 18.4             | 102.8 |
| 1993–1997       | 2.6             | 13.4             | 118.6 | 6.4             | 47.2             | 117.2 | 1.2             | 6.2              | 118.9 | 1.6             | 14.2             | 89.3  |
| 1998–2002       | 2.0             | 14.5             | 91.6  | 8.0             | 60.1             | 94.7  | 1.0             | 7.0              | 99.1  | 1.4             | 15.1             | 80.3  |
| 2003–2007       | 3.2             | 20.3             | 116.2 | 7.0             | 47.3             | 81.9  | 0.2             | 5.5              | 61.6  | 1.6             | 13.9             | 83.0  |
| 2008–2012       | 2.8             | 21.9             | 103.2 | 7.4             | 45.5             | 93.6  | 1.0             | 9.3              | 95.8  | 1.8             | 13.1             | 87.9  |
|                 | 25–34           |                  |       | 65–74           |                  |       | 25–34           |                  |       | 65–74           |                  |       |
| 1983–1987       | 4.8             | 30.8             | 120.6 | 2.8             | 44.1             | 100.8 | 1.2             | 9.6              | 89.2  | 3.0             | 32.3             | 103.4 |
| 1988–1992       | 3.6             | 23.7             | 124.1 | 3.2             | 41.0             | 116.4 | 0.8             | 7.5              | 86.5  | 2.2             | 22.9             | 87.9  |
| 1993–1997       | 4.4             | 25.9             | 132.4 | 2.2             | 26.8             | 84.1  | 0.8             | 7.3              | 87.4  | 2.6             | 21.4             | 109.7 |
| 1998–2002       | 3.2             | 22.9             | 84.9  | 3.0             | 34.8             | 76.5  | 1.0             | 9.5              | 82.3  | 2.8             | 22.2             | 105.7 |
| 2003–2007       | 4.6             | 29.0             | 93.6  | 7.4             | 58.8             | 137.1 | 1.4             | 11.3             | 86.6  | 5.4             | 31.8             | 170.9 |
| 2008–2012       | 4.4             | 30.9             | 94.9  | 7.0             | 51.0             | 129.0 | 1.2             | 11.9             | 82.9  | 2.0             | 17.0             | 95.3  |
|                 | 35–44           |                  |       | >74 y/o         |                  |       | 35–44           |                  |       | >74 y/o         |                  |       |
| 1983–1987       | 3.4             | 23.8             | 74.9  | 2.8             | 77.7             | 99.2  | 0.8             | 8.7              | 73.7  | 4.8             | 78.1             | 135.3 |
| 1988–1992       | 3.0             | 19.4             | 81.9  | 1.2             | 40.1             | 62.1  | 0.8             | 7.6              | 78.3  | 2.6             | 36.8             | 76.8  |
| 1993–1997       | 2.8             | 20.1             | 82.1  | 2.2             | 47.3             | 90.7  | 0.6             | 6.4              | 74.7  | 4.8             | 47.6             | 138.3 |
| 1998–2002       | 4.6             | 33.0             | 93.8  | 3.4             | 55.5             | 105.3 | 1.0             | 8.8              | 85.5  | 4.2             | 34.8             | 112.0 |
| 2003–2007       | 5.8             | 39.9             | 99.5  | 3.0             | 40.6             | 90.1  | 1.2             | 10.9             | 86.2  | 4.0             | 26.9             | 119.8 |
| 2008–2012       | 8.6             | 47.3             | 127.2 | 4.0             | 41.9             | 101.1 | 1.4             | 11.9             | 87.5  | 6.0             | 31.9             | 165.7 |

Secondary Medical Zone ID: 194

|                 | Male            |                  |       |                 |                  |       | Female          |                  |       |                 |                  |       |
|-----------------|-----------------|------------------|-------|-----------------|------------------|-------|-----------------|------------------|-------|-----------------|------------------|-------|
|                 | Suicide         |                  |       | Suicide         |                  |       | Suicide         |                  |       | Suicide         |                  |       |
|                 | Num<br>per year | Rate<br>/100,000 | × 100 | Num<br>per year | Rate<br>/100,000 | × 100 | Num<br>per year | Rate<br>/100,000 | × 100 | Num<br>per year | Rate<br>/100,000 | × 100 |
|                 |                 |                  |       |                 |                  |       |                 |                  |       |                 |                  |       |
| Total (>10 y/o) | 45–54           | Total (>10 y/o)  | 45–54 |                 |                  |       |                 |                  |       |                 |                  |       |
| 1983–1987       | 14.0            | 29.3             | 83.2  | 3.8             | 47.6             | 94.2  | 9.4             | 14.9             | 96.3  | 1.6             | 17.8             | 103.6 |
| 1988–1992       | 11.4            | 22.2             | 82.9  | 2.0             | 27.4             | 79.8  | 9.0             | 12.4             | 98.1  | 0.8             | 12.9             | 87.9  |
| 1993–1997       | 12.8            | 22.8             | 84.3  | 2.0             | 27.3             | 74.7  | 8.0             | 10.6             | 97.6  | 0.8             | 11.2             | 87.0  |
| 1998–2002       | 19.4            | 32.4             | 83.3  | 5.0             | 50.1             | 89.5  | 7.0             | 11.4             | 80.5  | 1.4             | 14.6             | 96.7  |
| 2003–2007       | 23.4            | 35.7             | 93.4  | 4.8             | 51.8             | 92.7  | 8.4             | 11.8             | 91.1  | 1.2             | 13.3             | 97.1  |
| 2008–2012       | 20.0            | 32.8             | 87.3  | 4.8             | 51.6             | 106.2 | 9.2             | 12.8             | 96.1  | 1.0             | 13.5             | 90.6  |
|                 | 15–24           |                  |       | 55–64           |                  |       | 15–24           |                  |       | 55–64           |                  |       |
| 1983–1987       | 0.4             | 9.4              | 67.2  | 2.4             | 38.8             | 91.2  | 0.6             | 6.6              | 96.9  | 1.4             | 18.8             | 95.3  |
| 1988–1992       | 1.4             | 11.1             | 111.8 | 1.6             | 27.1             | 76.2  | 0.2             | 4.2              | 78.9  | 1.8             | 19.3             | 108.0 |
| 1993–1997       | 1.6             | 12.5             | 110.6 | 3.2             | 40.2             | 99.8  | 1.2             | 7.2              | 138.8 | 1.2             | 15.2             | 95.9  |
| 1998–2002       | 1.6             | 15.6             | 98.9  | 4.0             | 53.1             | 83.5  | 0.6             | 6.7              | 96.1  | 1.4             | 17.8             | 94.6  |
| 2003–2007       | 1.6             | 17.1             | 98.0  | 4.8             | 51.5             | 89.3  | 0.8             | 9.0              | 99.7  | 1.6             | 16.6             | 98.9  |
| 2008–2012       | 2.2             | 23.1             | 109.0 | 3.2             | 39.3             | 80.8  | 1.0             | 10.7             | 109.8 | 2.2             | 17.0             | 114.2 |
|                 | 25–34           |                  |       | 65–74           |                  |       | 25–34           |                  |       | 65–74           |                  |       |
| 1983–1987       | 2.8             | 28.5             | 111.7 | 1.0             | 34.3             | 78.4  | 1.2             | 11.7             | 108.3 | 1.8             | 30.7             | 98.3  |
| 1988–1992       | 1.0             | 15.3             | 79.8  | 0.6             | 24.7             | 70.1  | 0.6             | 8.0              | 92.3  | 1.8             | 26.6             | 101.8 |
| 1993–1997       | 1.6             | 18.5             | 94.5  | 1.4             | 27.7             | 86.9  | 0.4             | 7.0              | 84.5  | 1.0             | 16.3             | 83.8  |
| 1998–2002       | 1.4             | 20.5             | 75.8  | 3.0             | 44.9             | 98.7  | 1.2             | 11.7             | 100.7 | 1.0             | 17.2             | 81.8  |
| 2003–2007       | 3.0             | 29.4             | 94.8  | 2.4             | 38.2             | 89.1  | 0.6             | 10.4             | 79.6  | 1.8             | 20.2             | 108.3 |
| 2008–2012       | 3.8             | 36.1             | 110.7 | 1.8             | 32.1             | 81.2  | 1.4             | 14.8             | 103.0 | 2.0             | 19.9             | 112.1 |
|                 | 35–44           |                  |       | >74 y/o         |                  |       | 35–44           |                  |       | >74 y/o         |                  |       |
| 1983–1987       | 2.2             | 25.6             | 80.4  | 1.2             | 64.1             | 81.9  | 0.6             | 9.8              | 82.6  | 2.2             | 58.6             | 101.6 |
| 1988–1992       | 2.6             | 24.2             | 102.0 | 2.2             | 72.4             | 112.2 | 1.6             | 11.5             | 119.5 | 2.2             | 45.3             | 94.7  |
| 1993–1997       | 2.2             | 23.6             | 96.1  | 0.8             | 36.8             | 70.7  | 0.6             | 7.7              | 90.5  | 2.8             | 43.4             | 126.2 |
| 1998–2002       | 3.0             | 33.7             | 95.6  | 1.4             | 43.9             | 83.3  | 0.4             | 8.2              | 79.3  | 1.0             | 18.9             | 60.9  |
| 2003–2007       | 5.0             | 47.8             | 119.4 | 1.8             | 39.7             | 88.1  | 0.6             | 10.5             | 83.0  | 1.8             | 20.9             | 93.2  |
| 2008–2012       | 2.6             | 30.8             | 82.8  | 1.6             | 32.7             | 78.9  | 0.8             | 11.6             | 85.7  | 0.8             | 12.3             | 64.0  |

Secondary Medical Zone ID: 195

|                 | Male            |                  |       |                 |                  |       | Female          |                  |       |                 |                  |       |
|-----------------|-----------------|------------------|-------|-----------------|------------------|-------|-----------------|------------------|-------|-----------------|------------------|-------|
|                 | Suicide         |                  |       | Suicide         |                  |       | Suicide         |                  |       | Suicide         |                  |       |
|                 | Num<br>per year | Rate<br>/100,000 | × 100 | Num<br>per year | Rate<br>/100,000 | × 100 | Num<br>per year | Rate<br>/100,000 | × 100 | Num<br>per year | Rate<br>/100,000 | × 100 |
|                 |                 |                  |       |                 |                  |       |                 |                  |       |                 |                  |       |
| Total (>10 y/o) | 45–54           | Total (>10 y/o)  | 45–54 |                 |                  |       |                 |                  |       |                 |                  |       |
| 1983–1987       | 18.2            | 30.0             | 86.9  | 3.8             | 40.7             | 80.5  | 13.4            | 15.8             | 106.2 | 1.8             | 17.3             | 100.6 |
| 1988–1992       | 17.6            | 24.8             | 101.9 | 3.4             | 33.3             | 97.0  | 8.4             | 11.3             | 80.7  | 1.4             | 14.2             | 97.0  |
| 1993–1997       | 15.6            | 23.3             | 87.6  | 3.2             | 31.8             | 86.9  | 8.6             | 10.0             | 90.1  | 1.4             | 12.8             | 98.9  |
| 1998–2002       | 28.4            | 36.3             | 103.8 | 5.8             | 52.2             | 93.3  | 8.8             | 11.6             | 83.4  | 2.2             | 16.8             | 111.7 |
| 2003–2007       | 25.0            | 33.9             | 92.2  | 4.4             | 46.5             | 83.1  | 9.0             | 11.6             | 88.5  | 0.6             | 11.0             | 80.0  |
| 2008–2012       | 24.4            | 34.1             | 96.7  | 4.2             | 46.3             | 95.3  | 10.6            | 12.5             | 99.5  | 0.6             | 11.7             | 78.3  |
|                 | 15–24           |                  |       | 55–64           |                  |       | 15–24           |                  |       | 55–64           |                  |       |
| 1983–1987       | 1.6             | 15.2             | 109.1 | 3.4             | 39.7             | 93.5  | 0.4             | 5.8              | 85.4  | 1.6             | 17.9             | 90.5  |
| 1988–1992       | 1.2             | 10.5             | 106.5 | 3.6             | 35.3             | 99.5  | 0.4             | 4.8              | 90.1  | 1.6             | 16.9             | 94.6  |
| 1993–1997       | 1.6             | 12.8             | 113.0 | 3.4             | 36.8             | 91.3  | 0.2             | 4.1              | 79.4  | 1.8             | 16.8             | 105.6 |
| 1998–2002       | 1.8             | 17.1             | 108.3 | 7.0             | 67.9             | 106.9 | 0.4             | 6.2              | 88.6  | 1.8             | 18.3             | 97.1  |
| 2003–2007       | 1.8             | 18.7             | 107.4 | 7.0             | 62.0             | 107.4 | 0.6             | 8.3              | 92.7  | 1.4             | 15.3             | 91.3  |
| 2008–2012       | 1.8             | 21.9             | 103.1 | 5.6             | 49.6             | 102.0 | 0.6             | 9.1              | 93.5  | 1.4             | 14.2             | 95.4  |
|                 | 25–34           |                  |       | 65–74           |                  |       | 25–34           |                  |       | 65–74           |                  |       |
| 1983–1987       | 2.8             | 26.8             | 104.9 | 2.0             | 40.1             | 91.5  | 1.0             | 10.5             | 97.3  | 3.4             | 37.8             | 121.0 |
| 1988–1992       | 1.6             | 18.3             | 95.7  | 1.8             | 32.2             | 91.4  | 0.0             | 5.7              | 65.5  | 1.8             | 22.7             | 87.0  |
| 1993–1997       | 1.6             | 18.3             | 93.6  | 1.0             | 20.7             | 64.8  | 0.6             | 7.6              | 91.3  | 1.0             | 14.4             | 74.1  |
| 1998–2002       | 2.8             | 26.8             | 99.2  | 4.0             | 45.7             | 100.5 | 0.8             | 10.3             | 88.5  | 1.6             | 18.8             | 89.5  |
| 2003–2007       | 3.6             | 32.5             | 104.9 | 3.2             | 39.4             | 91.9  | 1.2             | 12.5             | 96.5  | 2.2             | 20.6             | 110.5 |
| 2008–2012       | 5.0             | 41.7             | 127.9 | 2.8             | 35.8             | 90.7  | 1.0             | 13.3             | 92.7  | 1.8             | 18.0             | 101.3 |
|                 | 35–44           |                  |       | >74 y/o         |                  |       | 35–44           |                  |       | >74 y/o         |                  |       |
| 1983–1987       | 2.8             | 27.2             | 85.4  | 1.8             | 65.2             | 83.2  | 2.0             | 14.0             | 118.2 | 3.2             | 62.3             | 108.1 |
| 1988–1992       | 2.2             | 21.2             | 89.4  | 3.6             | 84.4             | 130.8 | 1.2             | 10.1             | 104.2 | 2.0             | 33.9             | 70.9  |
| 1993–1997       | 2.4             | 23.7             | 96.9  | 2.0             | 48.7             | 93.5  | 0.4             | 6.8              | 80.3  | 3.2             | 37.8             | 109.8 |
| 1998–2002       | 3.6             | 36.4             | 103.3 | 3.4             | 61.2             | 116.2 | 0.6             | 8.8              | 85.0  | 1.4             | 18.2             | 58.7  |
| 2003–2007       | 2.2             | 28.4             | 70.8  | 2.6             | 41.5             | 92.2  | 0.4             | 9.6              | 76.2  | 2.4             | 21.3             | 95.0  |
| 2008–2012       | 2.6             | 31.0             | 83.3  | 2.4             | 34.7             | 83.7  | 1.6             | 14.2             | 104.8 | 3.4             | 24.0             | 125.0 |

Secondary Medical Zone ID: 196

|                 | Male            |                  |       |                 |                  |       | Female          |                  |       |                 |                  |       |
|-----------------|-----------------|------------------|-------|-----------------|------------------|-------|-----------------|------------------|-------|-----------------|------------------|-------|
|                 | Suicide         |                  |       | Suicide         |                  |       | Suicide         |                  |       | Suicide         |                  |       |
|                 | Num<br>per year | Rate<br>/100,000 | × 100 | Num<br>per year | Rate<br>/100,000 | × 100 | Num<br>per year | Rate<br>/100,000 | × 100 | Num<br>per year | Rate<br>/100,000 | × 100 |
|                 |                 |                  |       |                 |                  |       |                 |                  |       |                 |                  |       |
| Total (>10 y/o) | 45–54           | Total (>10 y/o)  | 45–54 |                 |                  |       |                 |                  |       |                 |                  |       |
| 1983–1987       | 8.2             | 34.0             | 110.2 | 1.8             | 52.1             | 103.0 | 4.0             | 15.4             | 99.7  | 0.6             | 17.4             | 100.8 |
| 1988–1992       | 7.6             | 26.4             | 119.8 | 2.0             | 43.7             | 127.2 | 4.0             | 13.0             | 103.9 | 0.4             | 14.3             | 97.9  |
| 1993–1997       | 4.2             | 23.2             | 80.6  | 1.6             | 38.6             | 105.4 | 2.4             | 10.1             | 87.3  | 0.0             | 10.9             | 84.4  |
| 1998–2002       | 10.0            | 36.3             | 103.5 | 2.8             | 61.1             | 109.2 | 3.2             | 12.4             | 92.0  | 0.4             | 14.3             | 95.3  |
| 2003–2007       | 11.6            | 37.5             | 116.0 | 1.0             | 42.7             | 76.4  | 4.2             | 12.7             | 105.0 | 1.0             | 16.0             | 117.1 |
| 2008–2012       | 7.8             | 33.3             | 94.3  | 0.8             | 41.1             | 84.6  | 3.6             | 12.9             | 99.8  | 0.2             | 13.4             | 90.1  |
|                 | 15–24           |                  |       | 55–64           |                  |       | 15–24           |                  |       | 55–64           |                  |       |
| 1983–1987       | 1.2             | 20.2             | 144.7 | 1.6             | 45.5             | 107.2 | 0.0             | 6.0              | 87.7  | 0.2             | 16.5             | 83.6  |
| 1988–1992       | 1.0             | 12.7             | 128.5 | 1.6             | 39.2             | 110.4 | 0.0             | 4.6              | 87.8  | 0.6             | 17.6             | 98.6  |
| 1993–1997       | 0.0             | 9.7              | 85.4  | 1.0             | 36.9             | 91.6  | 0.0             | 4.6              | 87.7  | 0.2             | 13.7             | 85.9  |
| 1998–2002       | 1.0             | 18.5             | 117.1 | 2.4             | 65.4             | 103.0 | 0.2             | 7.0              | 99.4  | 0.2             | 16.6             | 88.0  |
| 2003–2007       | 0.6             | 18.0             | 103.4 | 3.2             | 67.6             | 117.0 | 0.2             | 8.8              | 97.5  | 0.6             | 16.6             | 98.9  |
| 2008–2012       | 0.2             | 19.1             | 90.0  | 2.6             | 52.8             | 108.6 | 0.0             | 8.3              | 85.3  | 0.2             | 13.4             | 89.6  |
|                 | 25–34           |                  |       | 65–74           |                  |       | 25–34           |                  |       | 65–74           |                  |       |
| 1983–1987       | 0.8             | 25.3             | 99.0  | 1.0             | 46.9             | 107.1 | 0.4             | 11.1             | 102.7 | 1.0             | 34.1             | 109.1 |
| 1988–1992       | 0.4             | 17.6             | 91.9  | 1.6             | 47.0             | 133.5 | 0.4             | 9.4              | 107.9 | 0.8             | 26.7             | 102.4 |
| 1993–1997       | 0.4             | 18.1             | 92.7  | 0.4             | 25.6             | 80.1  | 0.4             | 9.0              | 107.8 | 1.0             | 22.9             | 117.3 |
| 1998–2002       | 1.4             | 30.8             | 113.9 | 1.0             | 40.1             | 88.1  | 0.2             | 10.9             | 94.4  | 0.6             | 19.8             | 94.3  |
| 2003–2007       | 1.8             | 38.1             | 122.8 | 1.4             | 42.8             | 99.7  | 0.0             | 11.2             | 86.0  | 1.0             | 20.9             | 112.1 |
| 2008–2012       | 0.6             | 30.7             | 94.2  | 1.0             | 37.2             | 94.1  | 0.4             | 14.5             | 101.4 | 1.0             | 19.7             | 111.0 |
|                 | 35–44           |                  |       | >74 y/o         |                  |       | 35–44           |                  |       | >74 y/o         |                  |       |
| 1983–1987       | 0.2             | 23.5             | 74.0  | 1.6             | 101.1            | 129.0 | 0.4             | 11.8             | 99.7  | 1.4             | 69.0             | 119.6 |
| 1988–1992       | 0.6             | 21.4             | 90.1  | 0.4             | 51.1             | 79.2  | 0.2             | 9.1              | 94.2  | 1.6             | 60.4             | 126.2 |
| 1993–1997       | 0.6             | 22.0             | 89.6  | 0.2             | 37.1             | 71.3  | 0.0             | 7.1              | 83.4  | 0.8             | 31.8             | 92.3  |
| 1998–2002       | 0.6             | 29.6             | 84.0  | 0.8             | 49.2             | 93.3  | 0.8             | 12.6             | 121.7 | 0.8             | 27.2             | 87.7  |
| 2003–2007       | 1.4             | 42.3             | 105.6 | 2.2             | 62.1             | 137.9 | 0.4             | 12.6             | 100.0 | 1.0             | 23.3             | 104.0 |
| 2008–2012       | 1.2             | 37.7             | 101.5 | 1.4             | 43.1             | 104.0 | 1.0             | 16.1             | 118.4 | 0.8             | 18.3             | 95.1  |

Secondary Medical Zone ID: 197

|                 | Male            |                  |       |                 |                  |       | Female          |                  |       |                 |                  |       |
|-----------------|-----------------|------------------|-------|-----------------|------------------|-------|-----------------|------------------|-------|-----------------|------------------|-------|
|                 | Suicide         |                  |       | Suicide         |                  |       | Suicide         |                  |       | Suicide         |                  |       |
|                 | Num<br>per year | Rate<br>/100,000 | × 100 | Num<br>per year | Rate<br>/100,000 | × 100 | Num<br>per year | Rate<br>/100,000 | × 100 | Num<br>per year | Rate<br>/100,000 | × 100 |
|                 |                 |                  |       |                 |                  |       |                 |                  |       |                 |                  |       |
| Total (>10 y/o) | 45–54           | Total (>10 y/o)  | 45–54 |                 |                  |       |                 |                  |       |                 |                  |       |
| 1983–1987       | 22.8            | 36.5             | 120.5 | 5.6             | 59.2             | 117.1 | 12.2            | 15.9             | 106.1 | 2.2             | 19.8             | 114.7 |
| 1988–1992       | 18.2            | 28.1             | 122.0 | 3.0             | 35.8             | 104.2 | 11.6            | 13.4             | 111.3 | 1.2             | 14.3             | 98.1  |
| 1993–1997       | 22.6            | 30.5             | 143.0 | 5.0             | 46.7             | 127.6 | 8.6             | 10.8             | 101.6 | 1.4             | 13.8             | 106.8 |
| 1998–2002       | 28.2            | 41.1             | 130.5 | 6.2             | 65.3             | 116.7 | 9.0             | 12.1             | 97.9  | 0.8             | 13.4             | 89.1  |
| 2003–2007       | 25.0            | 41.0             | 123.2 | 4.8             | 61.7             | 110.3 | 10.4            | 12.9             | 115.4 | 0.8             | 13.0             | 95.2  |
| 2008–2012       | 21.8            | 37.1             | 119.2 | 4.2             | 55.7             | 114.6 | 7.8             | 12.7             | 101.5 | 1.0             | 15.1             | 101.3 |
|                 | 15–24           |                  |       | 55–64           |                  |       | 15–24           |                  |       | 55–64           |                  |       |
| 1983–1987       | 0.6             | 12.3             | 88.0  | 4.2             | 48.4             | 114.0 | 1.0             | 8.9              | 129.8 | 1.2             | 16.6             | 84.0  |
| 1988–1992       | 1.2             | 12.1             | 122.1 | 3.4             | 37.4             | 105.3 | 0.4             | 5.5              | 104.6 | 1.6             | 17.5             | 97.9  |
| 1993–1997       | 1.6             | 15.1             | 133.2 | 4.8             | 50.1             | 124.5 | 0.6             | 6.3              | 121.3 | 2.2             | 19.5             | 122.8 |
| 1998–2002       | 2.0             | 21.8             | 138.1 | 7.8             | 86.1             | 135.5 | 0.2             | 6.5              | 92.6  | 1.8             | 19.6             | 104.0 |
| 2003–2007       | 1.0             | 18.8             | 107.9 | 8.4             | 84.0             | 145.5 | 0.2             | 8.2              | 90.7  | 2.2             | 19.4             | 115.6 |
| 2008–2012       | 0.6             | 20.1             | 94.8  | 5.0             | 54.1             | 111.4 | 0.2             | 8.9              | 91.6  | 1.0             | 14.1             | 94.5  |
|                 | 25–34           |                  |       | 65–74           |                  |       | 25–34           |                  |       | 65–74           |                  |       |
| 1983–1987       | 2.2             | 27.9             | 109.1 | 2.4             | 45.9             | 104.8 | 0.8             | 11.0             | 101.9 | 2.4             | 31.9             | 102.1 |
| 1988–1992       | 3.2             | 32.6             | 170.4 | 1.6             | 32.1             | 91.1  | 0.8             | 9.7              | 111.8 | 2.6             | 29.8             | 114.4 |
| 1993–1997       | 2.6             | 28.2             | 144.1 | 2.6             | 35.5             | 111.3 | 0.0             | 6.4              | 76.7  | 1.0             | 15.1             | 77.7  |
| 1998–2002       | 2.0             | 29.1             | 107.9 | 6.0             | 63.5             | 139.7 | 0.6             | 11.3             | 97.3  | 1.4             | 18.6             | 88.4  |
| 2003–2007       | 1.8             | 31.7             | 102.2 | 2.8             | 41.1             | 95.7  | 0.0             | 10.0             | 77.1  | 2.0             | 20.8             | 111.5 |
| 2008–2012       | 1.8             | 34.9             | 107.1 | 3.6             | 46.1             | 116.8 | 0.8             | 15.4             | 107.5 | 0.6             | 14.4             | 80.6  |
|                 | 35–44           |                  |       | >74 y/o         |                  |       | 35–44           |                  |       | >74 y/o         |                  |       |
| 1983–1987       | 5.4             | 46.8             | 147.2 | 2.4             | 73.8             | 94.2  | 1.2             | 12.2             | 103.4 | 3.4             | 61.3             | 106.2 |
| 1988–1992       | 2.2             | 24.4             | 103.0 | 3.6             | 82.7             | 128.2 | 1.0             | 10.2             | 106.0 | 4.0             | 56.7             | 118.5 |
| 1993–1997       | 2.2             | 26.8             | 109.2 | 3.8             | 76.7             | 147.3 | 0.6             | 8.5              | 99.4  | 2.8             | 35.3             | 102.7 |
| 1998–2002       | 1.8             | 30.8             | 87.3  | 2.2             | 48.9             | 92.9  | 0.4             | 9.2              | 88.6  | 3.8             | 38.4             | 123.7 |
| 2003–2007       | 3.4             | 47.8             | 119.3 | 2.8             | 46.4             | 103.1 | 1.0             | 13.5             | 106.9 | 4.0             | 33.2             | 148.0 |
| 2008–2012       | 2.6             | 39.2             | 105.3 | 3.8             | 49.4             | 119.1 | 0.6             | 12.8             | 94.2  | 3.6             | 26.4             | 137.5 |

Secondary Medical Zone ID: 198

|           | Male            |          |       |          |          |       | Female          |          |       |          |          |       |
|-----------|-----------------|----------|-------|----------|----------|-------|-----------------|----------|-------|----------|----------|-------|
|           | Suicide         |          |       | Suicide  |          |       | Suicide         |          |       | Suicide  |          |       |
|           | Num             | Rate     | × 100 | Num      | Rate     | × 100 | Num             | Rate     | × 100 | Num      | Rate     | × 100 |
|           | per year        | /100,000 |       | per year | /100,000 |       | per year        | /100,000 |       | per year | /100,000 |       |
|           | Total (>10 y/o) |          |       | 45–54    |          |       | Total (>10 y/o) |          |       | 45–54    |          |       |
| 1983–1987 | 33.8            | 35.4     | 110.3 | 7.4      | 51.0     | 100.9 | 19.4            | 15.9     | 107.5 | 3.8      | 21.3     | 123.5 |
| 1988–1992 | 26.8            | 26.1     | 108.5 | 4.8      | 33.8     | 98.3  | 18.8            | 13.3     | 113.0 | 2.2      | 14.7     | 100.7 |
| 1993–1997 | 26.6            | 25.3     | 103.1 | 5.8      | 36.4     | 99.4  | 18.8            | 12.4     | 126.9 | 4.0      | 18.4     | 142.6 |
| 1998–2002 | 40.0            | 37.0     | 106.4 | 9.6      | 59.7     | 106.7 | 20.8            | 14.4     | 122.8 | 3.6      | 18.8     | 125.0 |
| 2003–2007 | 32.6            | 33.3     | 89.8  | 5.6      | 45.5     | 81.3  | 16.0            | 12.9     | 106.9 | 1.2      | 12.0     | 87.4  |
| 2008–2012 | 32.6            | 34.6     | 98.1  | 5.6      | 47.6     | 98.0  | 13.0            | 12.9     | 96.2  | 2.4      | 17.5     | 117.6 |
|           | 15–24           |          |       | 55–64    |          |       | 15–24           |          |       | 55–64    |          |       |
| 1983–1987 | 2.0             | 16.1     | 115.2 | 4.6      | 37.5     | 88.2  | 0.6             | 6.3      | 91.6  | 2.6      | 18.0     | 91.5  |
| 1988–1992 | 2.2             | 12.4     | 124.7 | 6.4      | 41.8     | 117.8 | 0.2             | 3.9      | 74.2  | 4.0      | 21.9     | 122.9 |
| 1993–1997 | 1.4             | 11.0     | 96.9  | 6.4      | 44.6     | 110.7 | 0.2             | 4.0      | 76.1  | 3.8      | 21.3     | 133.8 |
| 1998–2002 | 1.0             | 12.6     | 79.7  | 11.0     | 75.7     | 119.1 | 0.4             | 6.1      | 86.6  | 4.2      | 23.5     | 124.9 |
| 2003–2007 | 2.4             | 19.7     | 112.8 | 8.2      | 55.2     | 95.7  | 0.8             | 9.2      | 102.4 | 3.8      | 20.0     | 119.7 |
| 2008–2012 | 2.2             | 22.1     | 104.1 | 6.0      | 43.7     | 89.9  | 0.8             | 10.1     | 103.9 | 2.8      | 16.4     | 109.9 |
|           | 25–34           |          |       | 65–74    |          |       | 25–34           |          |       | 65–74    |          |       |
| 1983–1987 | 4.4             | 31.8     | 124.5 | 3.0      | 39.0     | 89.0  | 1.2             | 10.2     | 95.1  | 4.0      | 34.0     | 108.8 |
| 1988–1992 | 2.6             | 20.9     | 109.6 | 2.8      | 32.3     | 91.7  | 0.6             | 7.3      | 84.4  | 3.4      | 26.5     | 101.7 |
| 1993–1997 | 2.0             | 17.9     | 91.4  | 4.0      | 34.5     | 108.1 | 1.0             | 8.4      | 101.3 | 4.2      | 26.2     | 134.3 |
| 1998–2002 | 2.2             | 20.9     | 77.5  | 4.8      | 40.9     | 89.9  | 2.0             | 13.3     | 114.6 | 4.4      | 26.5     | 126.2 |
| 2003–2007 | 3.0             | 25.6     | 82.7  | 4.8      | 41.0     | 95.6  | 1.8             | 13.8     | 106.1 | 3.8      | 23.4     | 125.5 |
| 2008–2012 | 4.4             | 34.8     | 106.9 | 4.4      | 38.1     | 96.4  | 1.0             | 12.9     | 89.7  | 0.8      | 12.3     | 69.1  |
|           | 35–44           |          |       | >74 y/o  |          |       | 35–44           |          |       | >74 y/o  |          |       |
| 1983–1987 | 8.0             | 43.5     | 136.8 | 4.4      | 84.5     | 107.9 | 1.4             | 10.2     | 86.4  | 5.8      | 72.9     | 126.3 |
| 1988–1992 | 4.2             | 25.9     | 109.2 | 3.8      | 62.8     | 97.4  | 0.6             | 7.3      | 75.2  | 7.8      | 74.0     | 154.6 |
| 1993–1997 | 3.4             | 25.1     | 102.3 | 3.6      | 52.4     | 100.6 | 1.0             | 8.2      | 96.0  | 4.6      | 38.0     | 110.3 |
| 1998–2002 | 5.2             | 39.6     | 112.3 | 6.2      | 71.3     | 135.3 | 1.2             | 10.3     | 99.2  | 5.0      | 34.3     | 110.5 |
| 2003–2007 | 4.0             | 34.4     | 85.8  | 4.6      | 46.2     | 102.6 | 1.2             | 11.7     | 92.8  | 3.4      | 20.5     | 91.2  |
| 2008–2012 | 5.8             | 40.0     | 107.4 | 4.0      | 37.2     | 89.6  | 1.8             | 13.9     | 102.5 | 3.4      | 18.2     | 94.9  |

Secondary Medical Zone ID: 199

|                 | Male            |                  |       |                 |                  |       | Female          |                  |       |                 |                  |       |
|-----------------|-----------------|------------------|-------|-----------------|------------------|-------|-----------------|------------------|-------|-----------------|------------------|-------|
|                 | Suicide         |                  |       | Suicide         |                  |       | Suicide         |                  |       | Suicide         |                  |       |
|                 | Num<br>per year | Rate<br>/100,000 | × 100 | Num<br>per year | Rate<br>/100,000 | × 100 | Num<br>per year | Rate<br>/100,000 | × 100 | Num<br>per year | Rate<br>/100,000 | × 100 |
|                 |                 |                  |       |                 |                  |       |                 |                  |       |                 |                  |       |
| Total (>10 y/o) | 45–54           | Total (>10 y/o)  | 45–54 |                 |                  |       |                 |                  |       |                 |                  |       |
| 1983–1987       | 16.8            | 32.0             | 96.7  | 2.2             | 35.3             | 69.8  | 9.4             | 14.9             | 97.0  | 1.8             | 18.8             | 109.2 |
| 1988–1992       | 15.0            | 24.7             | 101.5 | 3.0             | 33.3             | 96.9  | 9.6             | 12.7             | 101.9 | 1.0             | 13.4             | 91.8  |
| 1993–1997       | 17.0            | 25.5             | 102.5 | 5.0             | 41.3             | 112.9 | 8.0             | 10.3             | 95.1  | 1.0             | 11.5             | 89.3  |
| 1998–2002       | 26.2            | 36.7             | 104.8 | 6.2             | 55.3             | 98.8  | 9.2             | 11.9             | 92.7  | 1.8             | 15.3             | 101.9 |
| 2003–2007       | 26.0            | 37.5             | 103.6 | 5.8             | 59.0             | 105.5 | 8.4             | 12.1             | 90.3  | 1.2             | 13.1             | 95.8  |
| 2008–2012       | 20.8            | 33.7             | 92.7  | 4.2             | 49.9             | 102.6 | 9.2             | 12.6             | 97.1  | 1.4             | 15.2             | 102.2 |
|                 | 15–24           |                  |       | 55–64           |                  |       | 15–24           |                  |       | 55–64           |                  |       |
| 1983–1987       | 1.0             | 13.3             | 95.4  | 2.4             | 39.0             | 91.7  | 0.2             | 5.7              | 83.1  | 2.0             | 22.2             | 112.6 |
| 1988–1992       | 1.2             | 10.4             | 105.5 | 3.0             | 36.4             | 102.4 | 0.6             | 5.6              | 106.9 | 1.6             | 18.3             | 102.5 |
| 1993–1997       | 1.0             | 10.2             | 90.3  | 2.4             | 33.9             | 84.3  | 0.8             | 6.0              | 115.8 | 1.4             | 16.0             | 100.7 |
| 1998–2002       | 1.2             | 13.6             | 86.1  | 5.8             | 63.8             | 100.4 | 0.6             | 6.7              | 95.5  | 1.8             | 19.0             | 100.9 |
| 2003–2007       | 1.4             | 15.9             | 91.3  | 6.6             | 60.5             | 104.9 | 1.2             | 10.7             | 119.0 | 0.8             | 13.4             | 79.8  |
| 2008–2012       | 1.8             | 21.1             | 99.5  | 4.2             | 42.7             | 88.0  | 0.6             | 9.1              | 94.0  | 1.4             | 14.0             | 93.7  |
|                 | 25–34           |                  |       | 65–74           |                  |       | 25–34           |                  |       | 65–74           |                  |       |
| 1983–1987       | 3.0             | 31.7             | 124.1 | 1.8             | 44.0             | 100.6 | 0.8             | 10.4             | 96.4  | 1.6             | 29.3             | 93.6  |
| 1988–1992       | 1.4             | 19.1             | 100.0 | 1.8             | 36.9             | 104.6 | 0.4             | 7.6              | 87.3  | 2.0             | 28.4             | 108.8 |
| 1993–1997       | 1.0             | 16.7             | 85.6  | 0.8             | 21.7             | 68.0  | 0.6             | 8.0              | 95.6  | 1.2             | 17.6             | 90.2  |
| 1998–2002       | 2.6             | 28.5             | 105.6 | 4.4             | 53.2             | 116.9 | 1.0             | 11.5             | 99.5  | 0.8             | 15.7             | 74.8  |
| 2003–2007       | 3.4             | 35.5             | 114.4 | 3.8             | 46.7             | 108.8 | 1.2             | 13.4             | 103.1 | 0.4             | 12.9             | 69.1  |
| 2008–2012       | 2.8             | 34.6             | 106.1 | 2.4             | 34.3             | 86.7  | 0.4             | 11.7             | 81.6  | 1.6             | 17.9             | 100.4 |
|                 | 35–44           |                  |       | >74 y/o         |                  |       | 35–44           |                  |       | >74 y/o         |                  |       |
| 1983–1987       | 3.8             | 34.2             | 107.5 | 2.6             | 88.5             | 113.0 | 1.2             | 11.6             | 98.6  | 1.8             | 48.1             | 83.4  |
| 1988–1992       | 2.6             | 23.8             | 100.4 | 2.0             | 64.6             | 100.1 | 1.2             | 10.1             | 104.5 | 2.8             | 51.7             | 108.1 |
| 1993–1997       | 3.4             | 30.4             | 123.9 | 3.2             | 75.8             | 145.5 | 0.2             | 6.1              | 72.1  | 2.8             | 40.8             | 118.5 |
| 1998–2002       | 3.6             | 39.0             | 110.7 | 2.2             | 52.8             | 100.3 | 0.2             | 7.5              | 72.3  | 3.0             | 35.9             | 115.5 |
| 2003–2007       | 3.2             | 39.7             | 99.1  | 1.8             | 37.9             | 84.1  | 0.8             | 11.5             | 91.2  | 2.8             | 27.0             | 120.2 |
| 2008–2012       | 3.0             | 36.4             | 97.8  | 2.2             | 36.7             | 88.4  | 1.4             | 14.3             | 105.5 | 2.4             | 20.9             | 108.7 |



Secondary Medical Zone ID: 200

|                 | Male            |                  |       |                 |                  |       | Female          |                  |       |                 |                  |       |
|-----------------|-----------------|------------------|-------|-----------------|------------------|-------|-----------------|------------------|-------|-----------------|------------------|-------|
|                 | Suicide         |                  |       | Suicide         |                  |       | Suicide         |                  |       | Suicide         |                  |       |
|                 | Num<br>per year | Rate<br>/100,000 | × 100 | Num<br>per year | Rate<br>/100,000 | × 100 | Num<br>per year | Rate<br>/100,000 | × 100 | Num<br>per year | Rate<br>/100,000 | × 100 |
|                 |                 |                  |       |                 |                  |       |                 |                  |       |                 |                  |       |
| Total (>10 y/o) | 45–54           |                  |       | Total (>10 y/o) | 45–54            |       |                 |                  |       |                 |                  |       |
| 1983–1987       | 188.0           | 30.1             | 91.1  | 44.4            | 45.4             | 89.9  | 111.2           | 15.1             | 98.4  | 22.0            | 20.8             | 120.6 |
| 1988–1992       | 141.4           | 21.4             | 86.2  | 33.8            | 32.2             | 93.9  | 106.6           | 13.2             | 101.9 | 18.8            | 16.4             | 112.0 |
| 1993–1997       | 159.4           | 22.8             | 90.2  | 43.0            | 37.0             | 101.1 | 82.0            | 9.9              | 87.8  | 15.4            | 12.4             | 96.4  |
| 1998–2002       | 251.4           | 33.8             | 96.0  | 63.8            | 59.2             | 105.8 | 105.0           | 12.5             | 93.7  | 16.8            | 14.7             | 97.5  |
| 2003–2007       | 224.6           | 31.5             | 85.1  | 40.6            | 46.4             | 83.0  | 111.0           | 13.0             | 101.4 | 14.2            | 14.9             | 108.4 |
| 2008–2012       | 223.6           | 31.9             | 91.7  | 38.6            | 45.3             | 93.3  | 108.2           | 13.2             | 100.1 | 15.4            | 16.7             | 112.1 |
|                 | 15–24           |                  |       | 55–64           |                  |       | 15–24           |                  |       | 55–64           |                  |       |
| 1983–1987       | 15.8            | 11.0             | 78.5  | 32.0            | 47.6             | 112.0 | 8.8             | 6.9              | 100.6 | 19.4            | 23.0             | 116.4 |
| 1988–1992       | 12.6            | 8.5              | 85.6  | 25.6            | 31.3             | 88.2  | 10.0            | 7.0              | 131.9 | 16.2            | 17.7             | 99.3  |
| 1993–1997       | 13.6            | 9.6              | 85.0  | 33.4            | 36.9             | 91.7  | 4.8             | 3.8              | 72.6  | 16.2            | 16.4             | 102.9 |
| 1998–2002       | 15.2            | 12.7             | 80.6  | 64.0            | 64.5             | 101.5 | 8.4             | 7.1              | 101.2 | 18.8            | 17.5             | 93.0  |
| 2003–2007       | 14.4            | 14.0             | 80.2  | 56.0            | 51.4             | 89.0  | 8.4             | 8.2              | 90.8  | 21.4            | 17.6             | 105.1 |
| 2008–2012       | 15.8            | 17.9             | 84.3  | 51.6            | 49.9             | 102.7 | 7.0             | 8.0              | 82.8  | 18.6            | 16.1             | 108.2 |
|                 | 25–34           |                  |       | 65–74           |                  |       | 25–34           |                  |       | 65–74           |                  |       |
| 1983–1987       | 22.0            | 21.3             | 83.3  | 15.8            | 38.9             | 88.8  | 11.0            | 10.5             | 97.6  | 16.2            | 26.3             | 84.2  |
| 1988–1992       | 16.2            | 16.1             | 84.4  | 11.4            | 26.8             | 76.1  | 10.0            | 9.6              | 110.9 | 16.0            | 24.0             | 91.9  |
| 1993–1997       | 21.0            | 19.1             | 97.5  | 16.2            | 29.1             | 91.1  | 10.6            | 9.3              | 112.1 | 13.6            | 18.2             | 93.4  |
| 1998–2002       | 26.2            | 22.4             | 82.9  | 36.0            | 50.4             | 110.8 | 15.6            | 12.6             | 109.0 | 16.6            | 19.8             | 94.1  |
| 2003–2007       | 30.4            | 27.0             | 87.0  | 27.4            | 35.0             | 81.6  | 18.8            | 15.6             | 119.7 | 21.4            | 22.6             | 121.2 |
| 2008–2012       | 29.0            | 30.8             | 94.4  | 28.2            | 33.2             | 84.2  | 13.4            | 13.5             | 94.5  | 19.6            | 19.1             | 107.3 |
|                 | 35–44           |                  |       | >74 y/o         |                  |       | 35–44           |                  |       | >74 y/o         |                  |       |
| 1983–1987       | 38.6            | 30.6             | 96.1  | 19.0            | 71.9             | 91.8  | 15.0            | 11.4             | 96.2  | 18.2            | 46.2             | 80.1  |
| 1988–1992       | 25.0            | 22.2             | 93.6  | 16.6            | 53.6             | 83.1  | 14.0            | 11.5             | 119.1 | 20.6            | 38.4             | 80.3  |
| 1993–1997       | 19.8            | 21.6             | 88.0  | 12.4            | 38.1             | 73.1  | 8.2             | 8.5              | 100.2 | 13.2            | 20.9             | 60.8  |
| 1998–2002       | 27.0            | 30.2             | 85.8  | 18.8            | 48.3             | 91.6  | 12.2            | 12.7             | 122.4 | 16.2            | 21.4             | 69.0  |
| 2003–2007       | 37.2            | 37.6             | 93.8  | 18.0            | 36.7             | 81.6  | 12.2            | 12.0             | 94.7  | 14.4            | 16.0             | 71.4  |
| 2008–2012       | 39.4            | 35.9             | 96.4  | 20.6            | 34.0             | 82.0  | 18.6            | 15.8             | 116.4 | 15.4            | 15.0             | 77.8  |

Secondary Medical Zone ID: 201

|                 | Male            |                  |       |                 |                  |       | Female          |                  |       |                 |                  |       |
|-----------------|-----------------|------------------|-------|-----------------|------------------|-------|-----------------|------------------|-------|-----------------|------------------|-------|
|                 | Suicide         |                  |       | Suicide         |                  |       | Suicide         |                  |       | Suicide         |                  |       |
|                 | Num<br>per year | Rate<br>/100,000 | × 100 | Num<br>per year | Rate<br>/100,000 | × 100 | Num<br>per year | Rate<br>/100,000 | × 100 | Num<br>per year | Rate<br>/100,000 | × 100 |
|                 |                 |                  |       |                 |                  |       |                 |                  |       |                 |                  |       |
| Total (>10 y/o) | 45–54           | Total (>10 y/o)  | 45–54 |                 |                  |       |                 |                  |       |                 |                  |       |
| 1983–1987       | 39.4            | 29.2             | 82.9  | 11.8            | 46.0             | 90.9  | 19.2            | 13.5             | 84.5  | 2.4             | 12.8             | 74.3  |
| 1988–1992       | 33.2            | 21.2             | 81.5  | 7.4             | 24.7             | 72.0  | 21.4            | 12.0             | 92.0  | 5.4             | 16.4             | 111.9 |
| 1993–1997       | 36.0            | 20.7             | 76.8  | 8.2             | 24.8             | 67.8  | 19.6            | 10.0             | 87.8  | 5.4             | 13.7             | 105.8 |
| 1998–2002       | 69.8            | 33.9             | 94.1  | 19.4            | 56.9             | 101.6 | 26.4            | 12.1             | 92.6  | 5.8             | 15.4             | 102.4 |
| 2003–2007       | 66.2            | 33.2             | 88.1  | 13.4            | 51.6             | 92.3  | 24.6            | 11.7             | 87.3  | 3.4             | 12.5             | 90.9  |
| 2008–2012       | 54.4            | 29.4             | 79.4  | 8.8             | 39.9             | 82.1  | 23.0            | 11.2             | 83.0  | 2.6             | 12.1             | 81.0  |
|                 | 15–24           |                  |       | 55–64           |                  |       | 15–24           |                  |       | 55–64           |                  |       |
| 1983–1987       | 2.0             | 9.3              | 66.4  | 5.2             | 37.6             | 88.5  | 1.8             | 6.7              | 98.2  | 3.0             | 19.4             | 98.5  |
| 1988–1992       | 3.4             | 9.4              | 94.9  | 6.2             | 31.4             | 88.4  | 1.0             | 3.8              | 71.3  | 3.6             | 18.0             | 100.7 |
| 1993–1997       | 3.8             | 10.2             | 90.4  | 8.2             | 33.9             | 84.2  | 1.4             | 4.3              | 83.0  | 3.6             | 15.1             | 95.1  |
| 1998–2002       | 6.0             | 17.1             | 108.5 | 16.4            | 54.2             | 85.2  | 3.4             | 9.3              | 132.1 | 6.0             | 19.3             | 102.5 |
| 2003–2007       | 3.4             | 13.8             | 79.2  | 17.2            | 49.8             | 86.4  | 2.2             | 8.6              | 96.0  | 5.4             | 15.2             | 90.8  |
| 2008–2012       | 4.2             | 18.1             | 85.2  | 10.2            | 35.3             | 72.6  | 2.0             | 9.2              | 94.8  | 2.8             | 10.3             | 68.9  |
|                 | 25–34           |                  |       | 65–74           |                  |       | 25–34           |                  |       | 65–74           |                  |       |
| 1983–1987       | 4.4             | 20.0             | 78.1  | 4.6             | 55.3             | 126.2 | 2.4             | 9.5              | 87.9  | 2.6             | 26.9             | 86.1  |
| 1988–1992       | 4.0             | 17.7             | 92.5  | 2.0             | 26.4             | 75.1  | 1.6             | 7.4              | 84.8  | 3.6             | 27.5             | 105.6 |
| 1993–1997       | 4.0             | 16.1             | 82.5  | 3.6             | 28.4             | 88.9  | 1.4             | 6.4              | 77.0  | 2.4             | 16.6             | 85.4  |
| 1998–2002       | 7.2             | 23.8             | 88.0  | 7.4             | 42.1             | 92.7  | 2.4             | 9.0              | 78.0  | 3.0             | 17.4             | 82.9  |
| 2003–2007       | 11.4            | 35.4             | 114.2 | 6.4             | 31.4             | 73.3  | 4.8             | 14.5             | 111.3 | 2.2             | 12.5             | 67.4  |
| 2008–2012       | 8.4             | 33.2             | 102.0 | 8.0             | 31.1             | 78.7  | 2.6             | 11.9             | 82.8  | 4.2             | 15.7             | 88.3  |
|                 | 35–44           |                  |       | >74 y/o         |                  |       | 35–44           |                  |       | >74 y/o         |                  |       |
| 1983–1987       | 8.6             | 23.6             | 74.1  | 2.8             | 72.2             | 92.2  | 4.0             | 10.7             | 90.7  | 3.0             | 49.7             | 86.1  |
| 1988–1992       | 7.0             | 21.1             | 88.9  | 3.2             | 60.3             | 93.5  | 2.6             | 8.0              | 83.2  | 3.6             | 39.4             | 82.3  |
| 1993–1997       | 4.6             | 18.7             | 76.3  | 3.4             | 52.5             | 100.8 | 3.2             | 10.1             | 118.5 | 1.8             | 18.0             | 52.4  |
| 1998–2002       | 7.0             | 29.9             | 84.9  | 6.0             | 67.3             | 127.7 | 3.2             | 11.6             | 111.8 | 2.6             | 19.3             | 62.0  |
| 2003–2007       | 9.8             | 36.6             | 91.2  | 4.6             | 40.9             | 90.8  | 3.4             | 12.3             | 97.4  | 3.2             | 17.5             | 77.9  |
| 2008–2012       | 9.6             | 31.8             | 85.5  | 5.0             | 34.3             | 82.6  | 3.8             | 12.4             | 91.5  | 5.0             | 20.5             | 106.8 |

Secondary Medical Zone ID: 202

|           | Male            |          |       |          |          |       | Female          |          |       |          |          |       |
|-----------|-----------------|----------|-------|----------|----------|-------|-----------------|----------|-------|----------|----------|-------|
|           | Suicide         |          |       | Suicide  |          |       | Suicide         |          |       | Suicide  |          |       |
|           | Num             | Rate     | × 100 | Num      | Rate     | × 100 | Num             | Rate     | × 100 | Num      | Rate     | × 100 |
|           | per year        | /100,000 |       | per year | /100,000 |       | per year        | /100,000 |       | per year | /100,000 |       |
|           | Total (>10 y/o) |          |       | 45–54    |          |       | Total (>10 y/o) |          |       | 45–54    |          |       |
| 1983–1987 | 5.6             | 28.9     | 73.9  | 2.6      | 54.6     | 108.0 | 5.4             | 15.8     | 105.0 | 0.8      | 17.6     | 102.4 |
| 1988–1992 | 7.2             | 23.7     | 91.9  | 1.6      | 31.6     | 92.1  | 4.6             | 12.4     | 95.3  | 0.4      | 13.1     | 89.7  |
| 1993–1997 | 8.0             | 23.7     | 87.8  | 1.4      | 28.8     | 78.7  | 6.2             | 11.6     | 114.7 | 1.0      | 13.2     | 101.9 |
| 1998–2002 | 11.4            | 31.7     | 78.2  | 2.8      | 45.1     | 80.6  | 6.2             | 12.5     | 97.7  | 1.2      | 14.9     | 99.2  |
| 2003–2007 | 11.4            | 30.6     | 70.4  | 2.4      | 42.4     | 75.8  | 6.4             | 12.2     | 95.5  | 0.6      | 12.0     | 87.7  |
| 2008–2012 | 14.4            | 32.4     | 87.4  | 2.8      | 45.9     | 94.4  | 5.0             | 11.7     | 83.8  | 0.6      | 12.9     | 86.5  |
|           | 15–24           |          |       | 55–64    |          |       | 15–24           |          |       | 55–64    |          |       |
| 1983–1987 | 0.0             | 10.0     | 71.6  | 0.0      | 27.6     | 64.8  | 0.0             | 5.7      | 83.5  | 0.6      | 18.8     | 95.5  |
| 1988–1992 | 0.4             | 9.3      | 94.2  | 1.2      | 32.8     | 92.2  | 0.2             | 4.9      | 92.8  | 1.0      | 19.2     | 107.4 |
| 1993–1997 | 0.4             | 10.0     | 88.3  | 2.2      | 42.2     | 104.7 | 0.4             | 5.4      | 103.5 | 0.8      | 16.1     | 101.4 |
| 1998–2002 | 0.6             | 13.8     | 87.4  | 3.0      | 55.2     | 86.8  | 0.6             | 7.5      | 107.2 | 1.2      | 19.1     | 101.5 |
| 2003–2007 | 1.4             | 19.2     | 109.9 | 2.4      | 41.5     | 71.8  | 0.6             | 9.3      | 102.9 | 1.0      | 15.5     | 92.3  |
| 2008–2012 | 1.2             | 21.7     | 102.1 | 2.6      | 40.8     | 83.9  | 0.2             | 7.9      | 81.7  | 1.0      | 13.8     | 92.3  |
|           | 25–34           |          |       | 65–74    |          |       | 25–34           |          |       | 65–74    |          |       |
| 1983–1987 | 1.0             | 25.5     | 99.6  | 0.2      | 33.6     | 76.8  | 1.0             | 13.5     | 125.6 | 0.6      | 27.5     | 87.9  |
| 1988–1992 | 1.6             | 26.0     | 136.2 | 0.6      | 32.1     | 91.2  | 0.2             | 7.8      | 90.3  | 0.6      | 23.0     | 88.1  |
| 1993–1997 | 0.2             | 14.9     | 76.3  | 1.0      | 31.7     | 99.3  | 0.2             | 7.4      | 89.1  | 1.8      | 29.0     | 148.8 |
| 1998–2002 | 0.8             | 22.4     | 83.0  | 2.0      | 46.9     | 103.1 | 0.6             | 11.0     | 94.6  | 1.0      | 21.5     | 102.3 |
| 2003–2007 | 1.6             | 27.7     | 89.2  | 0.8      | 31.1     | 72.4  | 1.0             | 13.0     | 100.1 | 2.2      | 26.2     | 140.6 |
| 2008–2012 | 1.4             | 29.0     | 89.1  | 2.4      | 39.3     | 99.4  | 1.0             | 14.3     | 99.8  | 1.0      | 17.5     | 98.1  |
|           | 35–44           |          |       | >74 y/o  |          |       | 35–44           |          |       | >74 y/o  |          |       |
| 1983–1987 | 1.2             | 26.6     | 83.4  | 0.6      | 64.3     | 82.1  | 0.6             | 11.4     | 96.4  | 1.8      | 77.7     | 134.7 |
| 1988–1992 | 1.0             | 19.9     | 84.0  | 0.8      | 59.2     | 91.7  | 0.2             | 8.0      | 83.2  | 2.0      | 64.4     | 134.7 |
| 1993–1997 | 1.8             | 27.0     | 110.3 | 1.0      | 54.5     | 104.7 | 1.0             | 10.4     | 122.0 | 1.0      | 32.3     | 93.7  |
| 1998–2002 | 1.2             | 28.3     | 80.4  | 1.0      | 50.4     | 95.6  | 0.8             | 10.9     | 105.6 | 0.8      | 24.7     | 79.5  |
| 2003–2007 | 1.4             | 28.6     | 71.5  | 1.4      | 45.9     | 102.0 | 0.4             | 10.5     | 83.2  | 0.6      | 16.4     | 73.3  |
| 2008–2012 | 3.0             | 36.4     | 97.9  | 1.0      | 34.9     | 84.2  | 0.4             | 10.8     | 79.3  | 0.8      | 16.4     | 85.1  |

Secondary Medical Zone ID: 203

|           | Male            |                  |       |                 |                  |       | Female          |                  |       |                 |                  |       |
|-----------|-----------------|------------------|-------|-----------------|------------------|-------|-----------------|------------------|-------|-----------------|------------------|-------|
|           | Suicide         |                  |       | Suicide         |                  |       | Suicide         |                  |       | Suicide         |                  |       |
|           | Num<br>per year | Rate<br>/100,000 | × 100 | Num<br>per year | Rate<br>/100,000 | × 100 | Num<br>per year | Rate<br>/100,000 | × 100 | Num<br>per year | Rate<br>/100,000 | × 100 |
|           |                 |                  |       |                 |                  |       |                 |                  |       |                 |                  |       |
|           | Total (>10 y/o) |                  |       | 45–54           |                  |       | Total (>10 y/o) |                  |       | 45–54           |                  |       |
| 1983–1987 | 93.2            | 25.9             | 75.6  | 24.6            | 37.7             | 74.5  | 52.4            | 13.5             | 86.8  | 9.0             | 14.2             | 82.7  |
| 1988–1992 | 82.6            | 20.8             | 82.3  | 20.4            | 27.9             | 81.2  | 51.2            | 11.6             | 89.6  | 10.2            | 13.6             | 92.9  |
| 1993–1997 | 90.2            | 20.6             | 81.2  | 26.6            | 33.2             | 90.7  | 44.8            | 9.4              | 84.4  | 11.2            | 13.2             | 101.9 |
| 1998–2002 | 155.6           | 33.3             | 93.4  | 36.8            | 50.8             | 90.8  | 60.6            | 12.0             | 92.4  | 10.0            | 13.3             | 88.6  |
| 2003–2007 | 143.8           | 31.7             | 85.6  | 29.0            | 48.6             | 86.9  | 65.0            | 12.5             | 98.6  | 8.8             | 13.7             | 99.8  |
| 2008–2012 | 127.4           | 28.8             | 81.4  | 23.2            | 39.9             | 82.0  | 65.4            | 13.1             | 96.7  | 10.6            | 16.5             | 110.4 |
|           | 15–24           |                  |       | 55–64           |                  |       | 15–24           |                  |       | 55–64           |                  |       |
| 1983–1987 | 8.4             | 10.5             | 75.0  | 13.2            | 36.3             | 85.5  | 4.6             | 6.2              | 90.2  | 6.4             | 16.6             | 83.9  |
| 1988–1992 | 7.0             | 8.1              | 81.9  | 14.2            | 29.2             | 82.1  | 4.8             | 5.6              | 106.7 | 8.4             | 16.6             | 93.0  |
| 1993–1997 | 9.6             | 11.3             | 100.0 | 17.8            | 30.9             | 76.7  | 4.0             | 5.1              | 97.2  | 5.8             | 10.5             | 66.0  |
| 1998–2002 | 13.0            | 17.7             | 112.3 | 43.4            | 65.6             | 103.3 | 4.8             | 7.2              | 101.9 | 10.2            | 15.4             | 81.6  |
| 2003–2007 | 11.8            | 18.8             | 107.7 | 34.4            | 49.3             | 85.4  | 4.4             | 8.0              | 89.0  | 13.4            | 17.2             | 102.8 |
| 2008–2012 | 7.2             | 14.8             | 69.7  | 23.8            | 37.5             | 77.3  | 5.2             | 10.2             | 104.9 | 12.2            | 16.2             | 108.7 |
|           | 25–34           |                  |       | 65–74           |                  |       | 25–34           |                  |       | 65–74           |                  |       |
| 1983–1987 | 13.4            | 19.6             | 76.5  | 6.8             | 38.9             | 89.0  | 6.4             | 9.1              | 84.4  | 7.0             | 28.1             | 90.0  |
| 1988–1992 | 13.8            | 19.9             | 103.9 | 6.4             | 30.1             | 85.4  | 5.2             | 7.7              | 88.5  | 6.6             | 22.6             | 86.5  |
| 1993–1997 | 11.6            | 16.2             | 83.0  | 8.0             | 26.6             | 83.4  | 6.2             | 8.3              | 100.2 | 6.2             | 16.9             | 86.8  |
| 1998–2002 | 20.0            | 25.9             | 95.7  | 17.0            | 42.1             | 92.5  | 7.4             | 9.8              | 84.7  | 12.8            | 26.4             | 125.7 |
| 2003–2007 | 21.4            | 30.7             | 99.0  | 16.4            | 34.3             | 80.0  | 11.2            | 14.9             | 114.7 | 8.8             | 16.3             | 87.4  |
| 2008–2012 | 17.2            | 30.2             | 92.8  | 19.6            | 35.7             | 90.4  | 7.4             | 12.6             | 87.7  | 9.2             | 14.8             | 83.3  |
|           | 35–44           |                  |       | >74 y/o         |                  |       | 35–44           |                  |       | >74 y/o         |                  |       |
| 1983–1987 | 20.4            | 23.5             | 74.0  | 6.2             | 64.4             | 82.2  | 10.0            | 11.0             | 92.8  | 8.8             | 54.8             | 95.1  |
| 1988–1992 | 14.8            | 19.0             | 80.3  | 5.6             | 47.5             | 73.6  | 9.2             | 10.7             | 110.8 | 6.6             | 31.5             | 65.8  |
| 1993–1997 | 10.6            | 17.0             | 69.5  | 5.8             | 41.4             | 79.5  | 4.6             | 7.1              | 82.9  | 6.4             | 24.5             | 71.3  |
| 1998–2002 | 18.0            | 28.9             | 82.1  | 7.4             | 41.3             | 78.3  | 8.8             | 12.7             | 123.2 | 6.4             | 20.1             | 64.6  |
| 2003–2007 | 19.4            | 28.4             | 71.0  | 11.2            | 42.6             | 94.6  | 9.0             | 12.4             | 98.0  | 9.2             | 21.1             | 94.1  |
| 2008–2012 | 24.0            | 31.7             | 85.3  | 12.2            | 35.0             | 84.3  | 14.2            | 16.5             | 122.0 | 6.6             | 12.4             | 64.6  |

Secondary Medical Zone ID: 204

|           | Male            |                  |       |                 |                  |       | Female          |                  |       |                 |                  |       |
|-----------|-----------------|------------------|-------|-----------------|------------------|-------|-----------------|------------------|-------|-----------------|------------------|-------|
|           | Suicide         |                  |       | Suicide         |                  |       | Suicide         |                  |       | Suicide         |                  |       |
|           | Num<br>per year | Rate<br>/100,000 | × 100 | Num<br>per year | Rate<br>/100,000 | × 100 | Num<br>per year | Rate<br>/100,000 | × 100 | Num<br>per year | Rate<br>/100,000 | × 100 |
|           |                 |                  |       |                 |                  |       |                 |                  |       |                 |                  |       |
|           | Total (>10 y/o) |                  |       | 45–54           |                  |       | Total (>10 y/o) |                  |       | 45–54           |                  |       |
| 1983–1987 | 65.6            | 26.4             | 76.1  | 19.2            | 41.2             | 81.5  | 33.6            | 13.2             | 84.1  | 6.2             | 14.8             | 85.9  |
| 1988–1992 | 55.8            | 20.0             | 77.7  | 14.8            | 27.1             | 79.0  | 35.6            | 11.6             | 90.2  | 7.6             | 14.0             | 95.5  |
| 1993–1997 | 66.4            | 21.1             | 81.5  | 19.6            | 32.9             | 89.8  | 34.4            | 9.9              | 91.1  | 9.0             | 13.9             | 107.6 |
| 1998–2002 | 111.4           | 32.6             | 90.2  | 22.6            | 43.9             | 78.4  | 47.0            | 12.7             | 99.0  | 9.2             | 15.7             | 104.6 |
| 2003–2007 | 94.6            | 28.7             | 76.4  | 15.6            | 38.3             | 68.5  | 35.0            | 10.1             | 76.1  | 4.8             | 11.4             | 83.2  |
| 2008–2012 | 96.6            | 29.7             | 83.5  | 15.4            | 39.6             | 81.5  | 43.6            | 12.5             | 90.3  | 5.4             | 13.5             | 90.3  |
|           | 15–24           |                  |       | 55–64           |                  |       | 15–24           |                  |       | 55–64           |                  |       |
| 1983–1987 | 4.8             | 9.1              | 65.4  | 8.6             | 35.3             | 83.0  | 2.2             | 4.9              | 71.9  | 5.6             | 20.5             | 104.1 |
| 1988–1992 | 4.4             | 7.5              | 75.4  | 10.6            | 30.8             | 86.6  | 3.2             | 5.2              | 98.7  | 6.2             | 17.9             | 100.3 |
| 1993–1997 | 5.6             | 9.5              | 84.4  | 14.2            | 33.1             | 82.3  | 3.4             | 5.6              | 107.2 | 7.6             | 17.4             | 109.2 |
| 1998–2002 | 7.0             | 14.4             | 91.0  | 31.4            | 61.1             | 96.2  | 4.4             | 8.5              | 120.7 | 10.0            | 19.1             | 101.6 |
| 2003–2007 | 6.6             | 16.6             | 95.0  | 24.2            | 45.3             | 78.4  | 2.6             | 7.2              | 80.2  | 7.6             | 13.7             | 82.1  |
| 2008–2012 | 7.4             | 20.8             | 98.1  | 18.2            | 38.7             | 79.7  | 3.2             | 9.3              | 96.3  | 9.4             | 16.3             | 109.5 |
|           | 25–34           |                  |       | 65–74           |                  |       | 25–34           |                  |       | 65–74           |                  |       |
| 1983–1987 | 6.0             | 13.7             | 53.7  | 5.2             | 43.0             | 98.3  | 4.4             | 9.1              | 84.4  | 3.6             | 24.0             | 76.7  |
| 1988–1992 | 7.4             | 15.1             | 79.2  | 4.4             | 30.0             | 85.2  | 5.0             | 9.8              | 112.9 | 2.6             | 15.6             | 59.6  |
| 1993–1997 | 9.6             | 17.2             | 87.8  | 4.2             | 21.6             | 67.6  | 4.6             | 8.4              | 101.4 | 1.8             | 9.8              | 50.2  |
| 1998–2002 | 17.4            | 27.8             | 103.0 | 13.6            | 45.7             | 100.5 | 7.4             | 12.1             | 104.7 | 6.2             | 19.8             | 94.4  |
| 2003–2007 | 13.4            | 24.5             | 79.1  | 14.4            | 38.9             | 90.7  | 5.4             | 10.3             | 78.8  | 6.2             | 16.4             | 88.3  |
| 2008–2012 | 10.0            | 23.8             | 73.0  | 13.2            | 30.9             | 78.2  | 8.8             | 17.4             | 121.2 | 5.8             | 13.4             | 75.0  |
|           | 35–44           |                  |       | >74 y/o         |                  |       | 35–44           |                  |       | >74 y/o         |                  |       |
| 1983–1987 | 17.6            | 27.2             | 85.5  | 4.0             | 70.7             | 90.2  | 6.8             | 10.5             | 88.6  | 4.4             | 47.6             | 82.6  |
| 1988–1992 | 9.8             | 17.8             | 75.3  | 4.2             | 54.1             | 83.9  | 4.8             | 8.4              | 87.2  | 6.0             | 42.4             | 88.6  |
| 1993–1997 | 9.2             | 20.5             | 83.5  | 4.0             | 42.3             | 81.3  | 3.2             | 7.2              | 84.6  | 4.8             | 27.0             | 78.3  |
| 1998–2002 | 13.6            | 31.3             | 89.0  | 5.4             | 43.1             | 81.8  | 5.2             | 11.4             | 110.6 | 4.6             | 21.1             | 67.9  |
| 2003–2007 | 15.2            | 31.2             | 77.8  | 5.2             | 30.8             | 68.4  | 3.6             | 8.7              | 69.0  | 4.8             | 16.6             | 74.0  |
| 2008–2012 | 22.4            | 37.7             | 101.4 | 9.6             | 38.2             | 92.1  | 7.2             | 12.5             | 92.5  | 3.4             | 10.3             | 53.7  |

Secondary Medical Zone ID: 205

|                 | Male               |                  |       |                    |                  |       | Female             |                  |       |                    |                  |       |
|-----------------|--------------------|------------------|-------|--------------------|------------------|-------|--------------------|------------------|-------|--------------------|------------------|-------|
|                 | Suicide            |                  |       | Suicide            |                  |       | Suicide            |                  |       | Suicide            |                  |       |
|                 | Num<br>per<br>year | Rate<br>/100,000 | × 100 | Num<br>per<br>year | Rate<br>/100,000 | × 100 | Num<br>per<br>year | Rate<br>/100,000 | × 100 | Num<br>per<br>year | Rate<br>/100,000 | × 100 |
|                 |                    |                  |       |                    |                  |       |                    |                  |       |                    |                  |       |
| Total (>10 y/o) | 45–54              | Total (>10 y/o)  | 45–54 |                    |                  |       |                    |                  |       |                    |                  |       |
| 1983–1987       | 127.8              | 29.4             | 89.2  | 39.8               | 49.2             | 97.2  | 73.2               | 16.4             | 108.9 | 14.4               | 18.8             | 109.2 |
| 1988–1992       | 105.2              | 22.3             | 89.4  | 30.2               | 31.9             | 93.0  | 64.6               | 12.8             | 100.0 | 12.2               | 13.2             | 90.6  |
| 1993–1997       | 120.6              | 22.7             | 90.0  | 36.6               | 36.2             | 99.0  | 58.0               | 10.1             | 93.8  | 13.2               | 12.6             | 97.2  |
| 1998–2002       | 219.0              | 37.9             | 108.4 | 46.2               | 53.1             | 94.8  | 77.6               | 12.8             | 100.5 | 15.6               | 16.4             | 109.0 |
| 2003–2007       | 193.6              | 34.6             | 96.5  | 35.0               | 51.0             | 91.2  | 73.0               | 12.4             | 95.8  | 8.8                | 12.5             | 91.4  |
| 2008–2012       | 178.6              | 33.2             | 97.0  | 30.2               | 46.6             | 95.9  | 73.6               | 12.8             | 95.9  | 12.0               | 17.4             | 116.9 |
|                 | 15–24              |                  |       | 55–64              |                  |       | 15–24              |                  |       | 55–64              |                  |       |
| 1983–1987       | 9.6                | 10.2             | 73.1  | 15.4               | 39.1             | 91.9  | 6.8                | 7.3              | 106.5 | 9.0                | 20.9             | 105.8 |
| 1988–1992       | 11.2               | 10.2             | 102.6 | 20.2               | 35.2             | 99.1  | 5.0                | 4.8              | 92.0  | 8.4                | 15.6             | 87.5  |
| 1993–1997       | 10.4               | 10.4             | 91.7  | 26.6               | 36.0             | 89.5  | 4.0                | 4.2              | 81.4  | 11.6               | 16.1             | 101.2 |
| 1998–2002       | 13.8               | 16.9             | 107.0 | 72.0               | 81.6             | 128.4 | 4.6                | 6.1              | 87.0  | 17.4               | 19.4             | 103.3 |
| 2003–2007       | 11.0               | 16.8             | 96.5  | 55.8               | 60.8             | 105.4 | 7.0                | 10.5             | 117.0 | 16.2               | 16.4             | 98.0  |
| 2008–2012       | 12.8               | 21.8             | 102.7 | 35.4               | 44.0             | 90.5  | 5.8                | 10.1             | 104.3 | 12.6               | 14.2             | 94.9  |
|                 | 25–34              |                  |       | 65–74              |                  |       | 25–34              |                  |       | 65–74              |                  |       |
| 1983–1987       | 17.6               | 22.4             | 87.5  | 7.6                | 40.3             | 92.2  | 9.0                | 11.3             | 104.7 | 8.6                | 30.9             | 98.9  |
| 1988–1992       | 11.6               | 15.2             | 79.7  | 7.6                | 32.9             | 93.3  | 8.4                | 10.6             | 122.3 | 10.8               | 32.4             | 124.0 |
| 1993–1997       | 13.2               | 15.0             | 76.6  | 10.6               | 31.6             | 98.9  | 6.2                | 7.2              | 87.0  | 7.8                | 19.6             | 100.7 |
| 1998–2002       | 25.4               | 26.1             | 96.7  | 25.4               | 52.5             | 115.4 | 11.6               | 12.0             | 103.1 | 10.4               | 20.6             | 97.9  |
| 2003–2007       | 25.2               | 29.7             | 95.6  | 27.6               | 44.1             | 102.8 | 10.0               | 11.8             | 91.1  | 11.6               | 17.8             | 95.6  |
| 2008–2012       | 18.0               | 28.7             | 88.2  | 31.0               | 40.5             | 102.6 | 8.6                | 13.3             | 93.1  | 14.2               | 17.2             | 96.6  |
|                 | 35–44              |                  |       | >74 y/o            |                  |       | 35–44              |                  |       | >74 y/o            |                  |       |
| 1983–1987       | 31.2               | 28.4             | 89.3  | 6.2                | 68.2             | 87.1  | 14.6               | 12.7             | 107.5 | 10.8               | 71.5             | 123.9 |
| 1988–1992       | 16.0               | 17.6             | 74.2  | 8.2                | 64.5             | 100.0 | 8.2                | 8.6              | 89.3  | 11.6               | 51.2             | 106.9 |
| 1993–1997       | 17.6               | 23.4             | 95.6  | 5.2                | 37.1             | 71.3  | 5.8                | 7.8              | 91.7  | 9.4                | 32.5             | 94.3  |
| 1998–2002       | 25.8               | 35.7             | 101.5 | 10.0               | 52.1             | 98.9  | 9.8                | 13.1             | 126.8 | 8.2                | 23.3             | 75.0  |
| 2003–2007       | 28.0               | 35.1             | 87.6  | 10.8               | 40.1             | 89.1  | 11.6               | 14.1             | 111.5 | 7.8                | 17.3             | 77.0  |
| 2008–2012       | 33.2               | 36.9             | 99.2  | 17.6               | 44.8             | 108.0 | 11.4               | 12.7             | 93.9  | 9.0                | 15.5             | 80.5  |

Secondary Medical Zone ID: 206

|                 | Male            |                  |       |                 |                  |       | Female          |                  |       |                 |                  |       |
|-----------------|-----------------|------------------|-------|-----------------|------------------|-------|-----------------|------------------|-------|-----------------|------------------|-------|
|                 | Suicide         |                  |       | Suicide         |                  |       | Suicide         |                  |       | Suicide         |                  |       |
|                 | Num<br>per year | Rate<br>/100,000 | × 100 | Num<br>per year | Rate<br>/100,000 | × 100 | Num<br>per year | Rate<br>/100,000 | × 100 | Num<br>per year | Rate<br>/100,000 | × 100 |
|                 |                 |                  |       |                 |                  |       |                 |                  |       |                 |                  |       |
| Total (>10 y/o) | 45–54           | Total (>10 y/o)  | 45–54 |                 |                  |       |                 |                  |       |                 |                  |       |
| 1983–1987       | 96.4            | 30.0             | 89.2  | 25.2            | 42.3             | 83.7  | 51.6            | 14.7             | 96.6  | 9.8             | 16.8             | 97.3  |
| 1988–1992       | 81.6            | 23.6             | 93.5  | 21.4            | 32.2             | 93.9  | 39.4            | 10.7             | 79.8  | 7.2             | 11.5             | 78.8  |
| 1993–1997       | 89.2            | 23.0             | 92.6  | 23.8            | 34.6             | 94.5  | 45.0            | 10.6             | 97.0  | 7.6             | 11.0             | 85.5  |
| 1998–2002       | 147.6           | 36.0             | 102.4 | 37.6            | 61.9             | 110.6 | 55.4            | 12.4             | 98.0  | 8.6             | 14.0             | 92.7  |
| 2003–2007       | 141.0           | 35.6             | 98.4  | 28.6            | 59.1             | 105.6 | 50.6            | 12.0             | 92.1  | 6.4             | 13.1             | 95.6  |
| 2008–2012       | 131.0           | 34.8             | 102.2 | 21.6            | 47.3             | 97.2  | 54.8            | 13.7             | 101.7 | 9.0             | 18.3             | 122.7 |
|                 | 15–24           |                  |       | 55–64           |                  |       | 15–24           |                  |       | 55–64           |                  |       |
| 1983–1987       | 7.4             | 10.4             | 74.3  | 15.4            | 45.6             | 107.4 | 4.0             | 6.2              | 90.6  | 8.4             | 21.8             | 110.6 |
| 1988–1992       | 5.4             | 7.5              | 75.8  | 13.0            | 29.6             | 83.3  | 3.4             | 4.9              | 92.3  | 7.0             | 15.8             | 88.6  |
| 1993–1997       | 5.8             | 8.7              | 77.3  | 24.2            | 43.6             | 108.2 | 4.0             | 5.9              | 112.7 | 8.2             | 15.0             | 94.2  |
| 1998–2002       | 6.8             | 12.6             | 79.4  | 46.4            | 74.6             | 117.4 | 3.2             | 6.3              | 89.9  | 12.2            | 19.0             | 100.7 |
| 2003–2007       | 7.4             | 15.7             | 90.2  | 39.4            | 61.4             | 106.4 | 2.8             | 6.9              | 76.6  | 10.2            | 15.3             | 91.2  |
| 2008–2012       | 8.6             | 20.7             | 97.5  | 27.0            | 48.5             | 99.8  | 3.8             | 9.7              | 99.7  | 11.0            | 17.4             | 116.4 |
|                 | 25–34           |                  |       | 65–74           |                  |       | 25–34           |                  |       | 65–74           |                  |       |
| 1983–1987       | 12.0            | 22.4             | 87.8  | 7.4             | 42.8             | 97.8  | 5.2             | 9.9              | 91.8  | 8.8             | 33.8             | 108.1 |
| 1988–1992       | 10.6            | 19.0             | 99.6  | 8.4             | 40.5             | 115.0 | 5.2             | 9.3              | 107.8 | 6.2             | 22.3             | 85.3  |
| 1993–1997       | 10.6            | 17.1             | 87.7  | 9.4             | 34.1             | 106.8 | 6.2             | 9.6              | 115.6 | 5.4             | 16.6             | 84.9  |
| 1998–2002       | 15.6            | 23.7             | 87.7  | 17.6            | 47.2             | 103.8 | 8.6             | 12.6             | 108.9 | 9.6             | 22.8             | 108.7 |
| 2003–2007       | 15.2            | 26.1             | 84.3  | 19.0            | 41.4             | 96.4  | 9.0             | 14.6             | 112.6 | 8.6             | 17.3             | 92.9  |
| 2008–2012       | 15.0            | 34.0             | 104.3 | 24.0            | 44.9             | 113.6 | 6.6             | 14.9             | 103.8 | 8.6             | 15.3             | 85.8  |
|                 | 35–44           |                  |       | >74 y/o         |                  |       | 35–44           |                  |       | >74 y/o         |                  |       |
| 1983–1987       | 21.2            | 28.6             | 89.7  | 7.4             | 80.1             | 102.3 | 7.8             | 10.5             | 88.9  | 7.4             | 50.6             | 87.7  |
| 1988–1992       | 16.0            | 24.8             | 104.7 | 6.8             | 60.9             | 94.4  | 4.8             | 7.9              | 81.9  | 5.6             | 29.3             | 61.2  |
| 1993–1997       | 10.6            | 21.1             | 85.9  | 4.8             | 40.2             | 77.2  | 5.4             | 9.9              | 116.9 | 8.2             | 33.0             | 95.8  |
| 1998–2002       | 17.4            | 34.4             | 97.7  | 6.2             | 41.6             | 78.9  | 5.8             | 11.3             | 109.0 | 7.4             | 24.8             | 80.0  |
| 2003–2007       | 20.4            | 36.1             | 90.1  | 11.0            | 49.9             | 110.8 | 8.0             | 13.7             | 108.7 | 5.6             | 15.4             | 68.7  |
| 2008–2012       | 25.0            | 40.5             | 109.0 | 9.6             | 34.2             | 82.4  | 9.4             | 15.0             | 110.3 | 6.2             | 14.1             | 73.3  |

Secondary Medical Zone ID: 207

|           | Male            |                  |       |                 |                  |       | Female          |                  |       |                 |                  |       |
|-----------|-----------------|------------------|-------|-----------------|------------------|-------|-----------------|------------------|-------|-----------------|------------------|-------|
|           | Suicide         |                  |       | Suicide         |                  |       | Suicide         |                  |       | Suicide         |                  |       |
|           | Num<br>per year | Rate<br>/100,000 | × 100 | Num<br>per year | Rate<br>/100,000 | × 100 | Num<br>per year | Rate<br>/100,000 | × 100 | Num<br>per year | Rate<br>/100,000 | × 100 |
|           |                 |                  |       |                 |                  |       |                 |                  |       |                 |                  |       |
|           | Total (>10 y/o) |                  |       | 45–54           |                  |       | Total (>10 y/o) |                  |       | 45–54           |                  |       |
| 1983–1987 | 61.6            | 29.1             | 85.0  | 16.2            | 41.0             | 81.2  | 28.8            | 12.8             | 80.4  | 6.0             | 15.8             | 91.5  |
| 1988–1992 | 55.6            | 22.3             | 89.6  | 15.0            | 31.9             | 92.9  | 32.6            | 11.6             | 89.7  | 6.8             | 14.3             | 97.5  |
| 1993–1997 | 63.0            | 22.6             | 88.9  | 19.2            | 37.1             | 101.4 | 36.8            | 11.1             | 103.5 | 6.4             | 12.0             | 92.8  |
| 1998–2002 | 92.2            | 31.7             | 85.6  | 24.0            | 51.6             | 92.2  | 43.4            | 12.3             | 98.4  | 6.8             | 13.8             | 91.5  |
| 2003–2007 | 100.2           | 33.5             | 92.7  | 19.2            | 50.1             | 89.6  | 38.0            | 11.6             | 88.9  | 5.2             | 12.8             | 93.1  |
| 2008–2012 | 100.2           | 35.1             | 100.8 | 19.0            | 51.8             | 106.6 | 42.0            | 12.4             | 97.2  | 6.8             | 16.5             | 110.9 |
|           | 15–24           |                  |       | 55–64           |                  |       | 15–24           |                  |       | 55–64           |                  |       |
| 1983–1987 | 6.2             | 13.5             | 97.0  | 10.2            | 42.5             | 100.1 | 2.2             | 5.3              | 78.3  | 3.2             | 14.6             | 73.8  |
| 1988–1992 | 5.6             | 10.2             | 103.5 | 10.4            | 32.4             | 91.3  | 2.0             | 4.1              | 78.2  | 5.2             | 16.3             | 91.5  |
| 1993–1997 | 4.4             | 9.3              | 81.9  | 14.6            | 37.4             | 93.0  | 2.6             | 5.0              | 95.3  | 4.6             | 12.5             | 78.8  |
| 1998–2002 | 6.6             | 15.4             | 97.2  | 25.0            | 55.7             | 87.6  | 4.0             | 8.4              | 119.1 | 10.2            | 20.7             | 110.2 |
| 2003–2007 | 4.8             | 14.1             | 80.6  | 27.2            | 56.1             | 97.2  | 4.0             | 10.1             | 112.2 | 9.2             | 17.1             | 102.4 |
| 2008–2012 | 6.2             | 19.0             | 89.6  | 20.4            | 46.4             | 95.4  | 2.6             | 8.2              | 84.8  | 8.2             | 16.0             | 107.2 |
|           | 25–34           |                  |       | 65–74           |                  |       | 25–34           |                  |       | 65–74           |                  |       |
| 1983–1987 | 5.2             | 16.8             | 65.7  | 4.8             | 40.4             | 92.4  | 2.0             | 6.8              | 63.2  | 5.0             | 29.9             | 95.8  |
| 1988–1992 | 6.6             | 18.2             | 95.0  | 5.6             | 36.0             | 102.1 | 2.6             | 7.2              | 83.4  | 4.4             | 22.3             | 85.4  |
| 1993–1997 | 8.0             | 18.9             | 96.9  | 3.2             | 18.1             | 56.8  | 4.0             | 8.6              | 103.7 | 5.8             | 21.9             | 112.6 |
| 1998–2002 | 9.0             | 21.0             | 77.8  | 9.4             | 35.4             | 77.9  | 4.2             | 9.4              | 80.9  | 6.8             | 21.4             | 102.1 |
| 2003–2007 | 11.8            | 29.2             | 94.2  | 16.2            | 46.4             | 108.2 | 4.4             | 10.9             | 83.5  | 4.2             | 12.9             | 69.4  |
| 2008–2012 | 11.0            | 33.9             | 104.0 | 14.0            | 35.4             | 89.6  | 3.6             | 11.8             | 82.6  | 8.4             | 18.5             | 103.9 |
|           | 35–44           |                  |       | >74 y/o         |                  |       | 35–44           |                  |       | >74 y/o         |                  |       |
| 1983–1987 | 12.0            | 24.5             | 76.9  | 6.8             | 101.3            | 129.3 | 5.6             | 10.6             | 90.1  | 4.6             | 47.3             | 82.0  |
| 1988–1992 | 7.8             | 17.7             | 74.7  | 4.4             | 54.3             | 84.2  | 5.8             | 10.9             | 113.3 | 5.8             | 39.8             | 83.3  |
| 1993–1997 | 7.4             | 19.3             | 78.7  | 6.2             | 58.9             | 113.0 | 5.2             | 11.1             | 130.8 | 8.0             | 40.8             | 118.7 |
| 1998–2002 | 12.2            | 32.0             | 90.7  | 5.8             | 45.9             | 87.0  | 3.2             | 8.5              | 82.2  | 8.0             | 32.6             | 104.8 |
| 2003–2007 | 14.2            | 35.4             | 88.3  | 6.8             | 38.4             | 85.3  | 5.0             | 11.7             | 92.5  | 5.8             | 19.1             | 85.2  |
| 2008–2012 | 19.2            | 42.5             | 114.3 | 10.0            | 41.2             | 99.3  | 5.2             | 11.8             | 87.0  | 7.2             | 18.8             | 97.6  |



Secondary Medical Zone ID: 208

|           | Male            |                  |       |                 |                  |       | Female          |                  |       |                 |                  |       |
|-----------|-----------------|------------------|-------|-----------------|------------------|-------|-----------------|------------------|-------|-----------------|------------------|-------|
|           | Suicide         |                  |       | Suicide         |                  |       | Suicide         |                  |       | Suicide         |                  |       |
|           | Num<br>per year | Rate<br>/100,000 | × 100 | Num<br>per year | Rate<br>/100,000 | × 100 | Num<br>per year | Rate<br>/100,000 | × 100 | Num<br>per year | Rate<br>/100,000 | × 100 |
|           |                 |                  |       |                 |                  |       |                 |                  |       |                 |                  |       |
|           | Total (>10 y/o) |                  |       | 45–54           |                  |       | Total (>10 y/o) |                  |       | 45–54           |                  |       |
| 1983–1987 | 104.0           | 33.1             | 99.9  | 30.8            | 53.1             | 104.9 | 51.0            | 15.3             | 99.8  | 9.4             | 17.0             | 98.9  |
| 1988–1992 | 84.2            | 24.4             | 99.0  | 22.2            | 33.6             | 97.9  | 49.0            | 12.7             | 100.4 | 12.4            | 17.9             | 122.2 |
| 1993–1997 | 93.0            | 24.5             | 98.9  | 24.2            | 34.9             | 95.5  | 46.8            | 11.1             | 102.4 | 9.2             | 12.6             | 97.5  |
| 1998–2002 | 154.4           | 38.7             | 109.9 | 34.6            | 56.9             | 101.6 | 58.4            | 13.3             | 103.9 | 9.0             | 14.0             | 92.7  |
| 2003–2007 | 132.6           | 33.8             | 95.1  | 22.2            | 47.5             | 84.9  | 60.4            | 13.8             | 108.3 | 7.4             | 14.2             | 103.7 |
| 2008–2012 | 126.2           | 33.5             | 96.6  | 21.8            | 48.2             | 99.3  | 60.0            | 13.8             | 106.0 | 8.2             | 16.7             | 112.1 |
|           | 15–24           |                  |       | 55–64           |                  |       | 15–24           |                  |       | 55–64           |                  |       |
| 1983–1987 | 7.4             | 11.8             | 84.6  | 13.6            | 42.6             | 100.2 | 3.4             | 5.7              | 84.0  | 8.4             | 22.9             | 116.1 |
| 1988–1992 | 7.8             | 10.6             | 107.0 | 14.6            | 33.7             | 94.8  | 4.4             | 6.0              | 114.3 | 7.2             | 16.7             | 93.4  |
| 1993–1997 | 9.4             | 13.4             | 118.8 | 22.6            | 42.4             | 105.4 | 3.6             | 5.4              | 103.9 | 9.8             | 18.1             | 113.9 |
| 1998–2002 | 8.8             | 16.6             | 105.2 | 44.0            | 72.5             | 114.0 | 3.8             | 7.2              | 102.9 | 12.0            | 19.2             | 102.2 |
| 2003–2007 | 4.2             | 11.8             | 67.5  | 37.8            | 59.2             | 102.6 | 4.8             | 10.8             | 120.0 | 13.0            | 18.3             | 109.4 |
| 2008–2012 | 9.2             | 22.7             | 107.1 | 25.4            | 44.9             | 92.5  | 5.2             | 12.6             | 129.7 | 12.0            | 17.7             | 118.7 |
|           | 25–34           |                  |       | 65–74           |                  |       | 25–34           |                  |       | 65–74           |                  |       |
| 1983–1987 | 11.8            | 21.6             | 84.7  | 9.2             | 55.5             | 126.8 | 7.6             | 12.5             | 116.1 | 7.8             | 34.1             | 109.0 |
| 1988–1992 | 8.8             | 16.8             | 88.1  | 9.0             | 44.1             | 125.2 | 3.6             | 7.1              | 82.3  | 8.0             | 29.6             | 113.3 |
| 1993–1997 | 9.4             | 16.5             | 84.5  | 8.8             | 32.6             | 102.1 | 7.0             | 11.0             | 131.9 | 6.8             | 20.5             | 105.3 |
| 1998–2002 | 18.4            | 28.5             | 105.7 | 19.2            | 51.9             | 114.1 | 8.0             | 12.2             | 105.4 | 7.6             | 19.2             | 91.5  |
| 2003–2007 | 17.8            | 30.4             | 98.1  | 21.2            | 47.0             | 109.5 | 9.4             | 14.8             | 114.1 | 10.2            | 20.5             | 110.1 |
| 2008–2012 | 13.8            | 29.3             | 90.1  | 21.0            | 40.4             | 102.2 | 7.8             | 15.1             | 105.4 | 11.6            | 19.6             | 110.2 |
|           | 35–44           |                  |       | >74 y/o         |                  |       | 35–44           |                  |       | >74 y/o         |                  |       |
| 1983–1987 | 23.2            | 30.2             | 94.7  | 7.4             | 90.5             | 115.6 | 7.6             | 9.9              | 83.6  | 6.2             | 49.2             | 85.2  |
| 1988–1992 | 14.8            | 22.5             | 94.9  | 6.8             | 65.2             | 101.1 | 5.8             | 8.6              | 89.3  | 7.2             | 38.8             | 81.1  |
| 1993–1997 | 10.4            | 20.7             | 84.4  | 7.4             | 58.8             | 112.9 | 4.2             | 8.0              | 93.9  | 6.2             | 26.6             | 77.4  |
| 1998–2002 | 19.2            | 39.5             | 112.1 | 9.8             | 60.0             | 113.9 | 8.0             | 14.7             | 142.4 | 9.6             | 31.7             | 101.9 |
| 2003–2007 | 19.8            | 36.9             | 92.2  | 9.6             | 43.8             | 97.2  | 9.2             | 15.6             | 123.3 | 6.2             | 16.6             | 74.1  |
| 2008–2012 | 23.2            | 36.1             | 97.0  | 11.4            | 38.9             | 93.8  | 7.2             | 11.6             | 85.7  | 7.8             | 16.5             | 86.0  |

Secondary Medical Zone ID: 209

|           | Male            |          |       |          |          |       | Female          |          |       |          |          |       |
|-----------|-----------------|----------|-------|----------|----------|-------|-----------------|----------|-------|----------|----------|-------|
|           | Suicide         |          |       | Suicide  |          |       | Suicide         |          |       | Suicide  |          |       |
|           | Num             | Rate     | × 100 | Num      | Rate     | × 100 | Num             | Rate     | × 100 | Num      | Rate     | × 100 |
|           | per year        | /100,000 |       | per year | /100,000 |       | per year        | /100,000 |       | per year | /100,000 |       |
|           | Total (>10 y/o) |          |       | 45–54    |          |       | Total (>10 y/o) |          |       | 45–54    |          |       |
| 1983–1987 | 108.4           | 34.8     | 108.2 | 36.0     | 65.1     | 128.8 | 51.8            | 15.4     | 99.8  | 8.2      | 15.5     | 89.9  |
| 1988–1992 | 87.4            | 25.5     | 104.8 | 19.0     | 31.3     | 91.1  | 58.0            | 14.1     | 114.2 | 10.4     | 16.2     | 110.8 |
| 1993–1997 | 95.2            | 24.9     | 100.7 | 22.4     | 33.4     | 91.2  | 50.2            | 11.2     | 105.3 | 8.6      | 12.5     | 96.6  |
| 1998–2002 | 153.6           | 37.3     | 104.8 | 36.4     | 56.6     | 101.2 | 62.8            | 13.3     | 105.2 | 12.4     | 17.7     | 117.6 |
| 2003–2007 | 154.2           | 36.7     | 102.4 | 31.0     | 56.9     | 101.8 | 67.6            | 13.6     | 112.2 | 9.8      | 16.2     | 118.6 |
| 2008–2012 | 137.2           | 34.2     | 97.4  | 28.2     | 53.0     | 109.1 | 64.8            | 13.4     | 106.3 | 10.4     | 18.0     | 120.9 |
|           | 15–24           |          |       | 55–64    |          |       | 15–24           |          |       | 55–64    |          |       |
| 1983–1987 | 8.0             | 13.4     | 96.3  | 15.0     | 43.7     | 102.8 | 3.4             | 5.8      | 85.5  | 6.2      | 16.9     | 85.9  |
| 1988–1992 | 7.8             | 11.2     | 113.6 | 19.6     | 43.2     | 121.6 | 4.0             | 5.8      | 109.3 | 10.6     | 21.8     | 121.8 |
| 1993–1997 | 9.0             | 13.1     | 116.0 | 22.4     | 43.2     | 107.2 | 4.2             | 6.1      | 117.5 | 8.2      | 15.5     | 97.6  |
| 1998–2002 | 9.2             | 16.1     | 101.7 | 40.0     | 67.7     | 106.5 | 5.8             | 9.5      | 134.7 | 12.6     | 20.2     | 107.2 |
| 2003–2007 | 6.4             | 13.8     | 79.4  | 38.8     | 59.7     | 103.4 | 3.6             | 7.7      | 85.9  | 14.6     | 20.2     | 120.7 |
| 2008–2012 | 6.8             | 15.8     | 74.3  | 27.4     | 44.9     | 92.5  | 2.4             | 6.3      | 64.5  | 10.0     | 14.9     | 100.1 |
|           | 25–34           |          |       | 65–74    |          |       | 25–34           |          |       | 65–74    |          |       |
| 1983–1987 | 9.6             | 19.7     | 77.0  | 9.8      | 54.8     | 125.2 | 5.4             | 10.1     | 93.8  | 8.8      | 34.1     | 109.0 |
| 1988–1992 | 7.6             | 15.6     | 81.4  | 8.2      | 37.9     | 107.5 | 5.6             | 10.1     | 116.2 | 9.0      | 29.7     | 113.7 |
| 1993–1997 | 12.0            | 20.3     | 103.8 | 12.2     | 40.3     | 126.3 | 4.6             | 7.7      | 92.9  | 7.6      | 20.8     | 106.6 |
| 1998–2002 | 19.6            | 28.9     | 107.2 | 17.0     | 45.2     | 99.5  | 6.6             | 9.9      | 85.1  | 7.4      | 17.7     | 84.3  |
| 2003–2007 | 18.0            | 29.2     | 94.2  | 22.4     | 49.0     | 114.1 | 9.4             | 14.0     | 107.7 | 10.4     | 20.2     | 108.5 |
| 2008–2012 | 19.8            | 38.0     | 116.8 | 18.0     | 35.2     | 89.2  | 8.6             | 15.8     | 110.4 | 11.0     | 18.7     | 105.1 |
|           | 35–44           |          |       | >74 y/o  |          |       | 35–44           |          |       | >74 y/o  |          |       |
| 1983–1987 | 22.8            | 32.6     | 102.6 | 6.6      | 78.1     | 99.8  | 8.4             | 11.8     | 100.0 | 11.2     | 74.7     | 129.5 |
| 1988–1992 | 15.6            | 24.2     | 102.3 | 9.4      | 80.3     | 124.4 | 6.0             | 9.2      | 95.0  | 12.2     | 54.8     | 114.4 |
| 1993–1997 | 11.0            | 20.6     | 84.0  | 6.2      | 47.3     | 90.9  | 5.6             | 9.5      | 111.9 | 11.4     | 40.9     | 119.0 |
| 1998–2002 | 21.0            | 37.8     | 107.3 | 9.8      | 56.3     | 106.8 | 6.8             | 11.6     | 112.6 | 11.2     | 32.8     | 105.7 |
| 2003–2007 | 23.8            | 38.8     | 96.9  | 13.8     | 55.7     | 123.6 | 8.6             | 13.3     | 105.4 | 11.2     | 25.7     | 114.5 |
| 2008–2012 | 25.4            | 37.4     | 100.4 | 11.6     | 37.5     | 90.4  | 11.4            | 15.4     | 113.7 | 10.8     | 20.3     | 105.6 |

Secondary Medical Zone ID: 210

|                 | Male            |                  |       |                 |                  |       | Female          |                  |       |                 |                  |       |
|-----------------|-----------------|------------------|-------|-----------------|------------------|-------|-----------------|------------------|-------|-----------------|------------------|-------|
|                 | Suicide         |                  |       | Suicide         |                  |       | Suicide         |                  |       | Suicide         |                  |       |
|                 | Num<br>per year | Rate<br>/100,000 | × 100 | Num<br>per year | Rate<br>/100,000 | × 100 | Num<br>per year | Rate<br>/100,000 | × 100 | Num<br>per year | Rate<br>/100,000 | × 100 |
|                 |                 |                  |       |                 |                  |       |                 |                  |       |                 |                  |       |
| Total (>10 y/o) | 45–54           | Total (>10 y/o)  | 45–54 |                 |                  |       |                 |                  |       |                 |                  |       |
| 1983–1987       | 385.4           | 36.0             | 110.9 | 109.0           | 58.9             | 116.5 | 191.6           | 16.1             | 105.6 | 34.4            | 18.1             | 104.8 |
| 1988–1992       | 325.6           | 28.6             | 118.0 | 85.4            | 44.5             | 129.5 | 157.0           | 12.5             | 96.0  | 29.8            | 15.5             | 106.2 |
| 1993–1997       | 347.8           | 28.8             | 117.1 | 88.4            | 43.7             | 119.6 | 146.6           | 11.3             | 100.2 | 29.0            | 14.8             | 114.6 |
| 1998–2002       | 589.4           | 46.1             | 133.8 | 149.0           | 79.9             | 142.8 | 201.6           | 14.8             | 114.7 | 32.8            | 18.5             | 122.8 |
| 2003–2007       | 532.0           | 42.1             | 120.2 | 91.6            | 59.8             | 106.9 | 202.0           | 15.5             | 117.3 | 24.8            | 16.6             | 121.2 |
| 2008–2012       | 486.4           | 38.9             | 117.0 | 85.2            | 56.8             | 116.8 | 220.0           | 17.0             | 125.8 | 31.4            | 20.9             | 139.8 |
|                 | 15–24           |                  |       | 55–64           |                  |       | 15–24           |                  |       | 55–64           |                  |       |
| 1983–1987       | 20.0            | 10.1             | 72.2  | 68.4            | 54.5             | 128.1 | 16.0            | 8.0              | 117.4 | 30.2            | 20.7             | 105.1 |
| 1988–1992       | 18.8            | 9.3              | 93.8  | 69.0            | 44.9             | 126.4 | 13.2            | 6.5              | 123.5 | 25.4            | 15.9             | 88.8  |
| 1993–1997       | 19.6            | 10.5             | 93.1  | 87.8            | 51.9             | 129.0 | 10.6            | 5.7              | 109.9 | 26.4            | 15.2             | 95.5  |
| 1998–2002       | 24.8            | 15.6             | 98.8  | 181.0           | 101.6            | 159.9 | 13.2            | 8.2              | 117.2 | 39.6            | 21.8             | 115.6 |
| 2003–2007       | 25.4            | 18.6             | 106.4 | 153.6           | 81.4             | 141.1 | 17.2            | 12.2             | 136.1 | 38.2            | 20.3             | 121.5 |
| 2008–2012       | 26.4            | 21.9             | 103.3 | 116.6           | 65.0             | 133.8 | 17.2            | 13.5             | 139.4 | 30.6            | 17.8             | 119.3 |
|                 | 25–34           |                  |       | 65–74           |                  |       | 25–34           |                  |       | 65–74           |                  |       |
| 1983–1987       | 40.8            | 22.9             | 89.4  | 37.2            | 54.2             | 123.9 | 19.8            | 11.7             | 108.7 | 29.8            | 30.7             | 98.2  |
| 1988–1992       | 34.0            | 19.0             | 99.6  | 31.4            | 40.9             | 116.0 | 18.8            | 10.7             | 123.4 | 26.4            | 24.6             | 94.4  |
| 1993–1997       | 37.0            | 19.2             | 98.2  | 41.6            | 42.0             | 131.7 | 22.0            | 11.3             | 135.5 | 21.4            | 17.3             | 88.8  |
| 1998–2002       | 59.2            | 28.7             | 106.1 | 80.4            | 64.1             | 140.9 | 33.2            | 15.8             | 136.0 | 33.6            | 23.2             | 110.5 |
| 2003–2007       | 63.6            | 32.7             | 105.4 | 87.4            | 61.4             | 143.1 | 34.6            | 17.1             | 131.2 | 30.8            | 19.3             | 103.8 |
| 2008–2012       | 56.0            | 32.0             | 98.4  | 80.2            | 53.5             | 135.3 | 37.2            | 20.0             | 139.6 | 35.0            | 20.9             | 117.4 |
|                 | 35–44           |                  |       | >74 y/o         |                  |       | 35–44           |                  |       | >74 y/o         |                  |       |
| 1983–1987       | 76.8            | 36.3             | 114.0 | 31.6            | 88.2             | 112.6 | 31.6            | 15.0             | 127.1 | 29.0            | 51.3             | 89.0  |
| 1988–1992       | 56.4            | 29.1             | 123.0 | 29.0            | 67.8             | 105.1 | 17.6            | 9.7              | 100.5 | 25.0            | 34.5             | 72.1  |
| 1993–1997       | 46.8            | 29.1             | 118.9 | 25.4            | 53.4             | 102.5 | 14.8            | 9.7              | 114.0 | 21.4            | 24.5             | 71.1  |
| 1998–2002       | 59.6            | 38.4             | 109.0 | 33.8            | 57.8             | 109.7 | 20.4            | 13.3             | 128.2 | 28.4            | 26.3             | 84.6  |
| 2003–2007       | 75.4            | 44.0             | 109.9 | 34.4            | 44.4             | 98.7  | 32.8            | 18.6             | 147.0 | 23.2            | 17.2             | 76.8  |
| 2008–2012       | 76.4            | 39.0             | 104.8 | 44.2            | 44.9             | 108.3 | 39.4            | 19.6             | 144.2 | 28.8            | 17.6             | 91.3  |

Secondary Medical Zone ID: 211

|                 | Male            |                  |       |                 |                  |       | Female          |                  |       |                 |                  |       |
|-----------------|-----------------|------------------|-------|-----------------|------------------|-------|-----------------|------------------|-------|-----------------|------------------|-------|
|                 | Suicide         |                  |       | Suicide         |                  |       | Suicide         |                  |       | Suicide         |                  |       |
|                 | Num<br>per year | Rate<br>/100,000 | × 100 | Num<br>per year | Rate<br>/100,000 | × 100 | Num<br>per year | Rate<br>/100,000 | × 100 | Num<br>per year | Rate<br>/100,000 | × 100 |
|                 |                 |                  |       |                 |                  |       |                 |                  |       |                 |                  |       |
| Total (>10 y/o) | 45–54           | Total (>10 y/o)  | 45–54 |                 |                  |       |                 |                  |       |                 |                  |       |
| 1983–1987       | 191.8           | 34.5             | 107.0 | 54.4            | 58.1             | 114.8 | 102.0           | 15.9             | 104.8 | 21.6            | 21.2             | 123.0 |
| 1988–1992       | 150.4           | 25.0             | 101.9 | 36.4            | 36.2             | 105.5 | 91.6            | 12.9             | 99.9  | 16.2            | 15.2             | 103.8 |
| 1993–1997       | 154.0           | 24.5             | 98.0  | 38.2            | 35.2             | 96.1  | 82.0            | 11.0             | 101.3 | 14.4            | 12.7             | 98.4  |
| 1998–2002       | 248.0           | 36.2             | 101.8 | 66.4            | 61.9             | 110.6 | 103.8           | 13.1             | 101.6 | 18.0            | 15.9             | 105.8 |
| 2003–2007       | 243.8           | 35.3             | 97.1  | 44.6            | 48.9             | 87.5  | 105.2           | 13.4             | 102.1 | 16.6            | 16.3             | 118.8 |
| 2008–2012       | 225.6           | 33.5             | 96.7  | 40.8            | 47.2             | 97.0  | 111.6           | 14.2             | 106.9 | 16.8            | 17.2             | 115.6 |
|                 | 15–24           |                  |       | 55–64           |                  |       | 15–24           |                  |       | 55–64           |                  |       |
| 1983–1987       | 15.0            | 15.2             | 109.1 | 26.2            | 39.7             | 93.3  | 7.6             | 7.4              | 108.5 | 15.0            | 19.7             | 99.8  |
| 1988–1992       | 12.6            | 11.3             | 113.7 | 28.0            | 34.3             | 96.6  | 7.2             | 6.2              | 117.8 | 14.6            | 16.5             | 92.6  |
| 1993–1997       | 14.2            | 13.3             | 118.0 | 33.0            | 38.7             | 96.1  | 6.2             | 5.7              | 108.6 | 14.2            | 15.3             | 96.2  |
| 1998–2002       | 17.0            | 17.6             | 111.6 | 63.2            | 66.5             | 104.7 | 8.6             | 8.4              | 119.9 | 18.4            | 18.1             | 95.9  |
| 2003–2007       | 16.0            | 18.6             | 106.9 | 62.0            | 58.0             | 100.5 | 7.4             | 8.6              | 95.2  | 18.2            | 16.0             | 95.5  |
| 2008–2012       | 17.8            | 23.6             | 111.5 | 50.8            | 48.6             | 100.0 | 9.2             | 11.7             | 120.8 | 20.2            | 17.5             | 117.3 |
|                 | 25–34           |                  |       | 65–74           |                  |       | 25–34           |                  |       | 65–74           |                  |       |
| 1983–1987       | 25.6            | 28.5             | 111.6 | 16.4            | 45.7             | 104.3 | 11.6            | 12.2             | 113.5 | 16.0            | 32.2             | 103.1 |
| 1988–1992       | 17.8            | 20.2             | 105.7 | 12.8            | 31.0             | 87.9  | 10.6            | 10.8             | 125.1 | 14.8            | 25.6             | 97.9  |
| 1993–1997       | 17.4            | 19.4             | 99.3  | 16.2            | 30.1             | 94.5  | 11.0            | 10.9             | 130.4 | 11.4            | 17.2             | 88.4  |
| 1998–2002       | 27.8            | 27.6             | 102.0 | 31.2            | 45.1             | 99.2  | 13.8            | 12.7             | 109.3 | 15.8            | 19.4             | 92.5  |
| 2003–2007       | 31.6            | 32.2             | 103.9 | 32.2            | 41.5             | 96.7  | 17.8            | 16.2             | 124.4 | 18.0            | 19.5             | 104.9 |
| 2008–2012       | 27.4            | 33.0             | 101.2 | 32.0            | 38.2             | 96.6  | 12.4            | 13.6             | 95.0  | 18.6            | 18.8             | 105.8 |
|                 | 35–44           |                  |       | >74 y/o         |                  |       | 35–44           |                  |       | >74 y/o         |                  |       |
| 1983–1987       | 40.6            | 35.8             | 112.5 | 12.8            | 68.4             | 87.3  | 13.6            | 11.6             | 98.1  | 16.2            | 51.5             | 89.3  |
| 1988–1992       | 27.4            | 25.2             | 106.1 | 14.8            | 62.0             | 96.1  | 13.2            | 11.4             | 117.8 | 14.8            | 36.3             | 75.9  |
| 1993–1997       | 22.0            | 24.0             | 98.1  | 12.2            | 47.7             | 91.7  | 8.8             | 9.0              | 105.4 | 15.2            | 32.5             | 94.5  |
| 1998–2002       | 27.8            | 31.8             | 90.2  | 14.6            | 43.2             | 81.9  | 11.0            | 11.4             | 110.0 | 17.6            | 28.6             | 92.1  |
| 2003–2007       | 35.8            | 38.2             | 95.3  | 21.2            | 43.9             | 97.5  | 14.6            | 14.1             | 111.6 | 12.4            | 15.6             | 69.6  |
| 2008–2012       | 33.6            | 32.8             | 88.3  | 22.8            | 37.8             | 91.1  | 18.8            | 16.3             | 120.4 | 15.0            | 15.2             | 78.9  |

Secondary Medical Zone ID: 212

|                 | Male            |                  |       |                 |                  |       | Female          |                  |       |                 |                  |       |
|-----------------|-----------------|------------------|-------|-----------------|------------------|-------|-----------------|------------------|-------|-----------------|------------------|-------|
|                 | Suicide         |                  |       | Suicide         |                  |       | Suicide         |                  |       | Suicide         |                  |       |
|                 | Num<br>per year | Rate<br>/100,000 | × 100 | Num<br>per year | Rate<br>/100,000 | × 100 | Num<br>per year | Rate<br>/100,000 | × 100 | Num<br>per year | Rate<br>/100,000 | × 100 |
|                 |                 |                  |       |                 |                  |       |                 |                  |       |                 |                  |       |
| Total (>10 y/o) | 45–54           | Total (>10 y/o)  | 45–54 |                 |                  |       |                 |                  |       |                 |                  |       |
| 1983–1987       | 123.8           | 31.3             | 95.5  | 34.4            | 51.0             | 100.8 | 63.6            | 14.6             | 96.1  | 9.4             | 14.2             | 82.6  |
| 1988–1992       | 91.2            | 22.1             | 88.9  | 19.2            | 27.4             | 79.9  | 58.2            | 12.3             | 95.8  | 10.0            | 13.8             | 94.6  |
| 1993–1997       | 103.0           | 24.1             | 95.5  | 26.8            | 35.8             | 97.8  | 48.2            | 10.0             | 90.9  | 9.6             | 12.6             | 97.6  |
| 1998–2002       | 162.2           | 35.3             | 99.2  | 40.6            | 57.9             | 103.5 | 67.6            | 12.8             | 101.4 | 10.4            | 14.5             | 96.3  |
| 2003–2007       | 148.8           | 32.5             | 88.7  | 28.6            | 48.7             | 87.0  | 64.8            | 12.8             | 96.7  | 9.6             | 15.0             | 109.7 |
| 2008–2012       | 144.4           | 31.8             | 91.8  | 25.4            | 43.5             | 89.6  | 65.4            | 12.7             | 95.9  | 10.2            | 16.2             | 108.8 |
|                 | 15–24           |                  |       | 55–64           |                  |       | 15–24           |                  |       | 55–64           |                  |       |
| 1983–1987       | 9.6             | 12.8             | 91.7  | 20.4            | 46.1             | 108.5 | 6.2             | 7.9              | 115.4 | 10.2            | 20.3             | 102.8 |
| 1988–1992       | 7.0             | 9.1              | 91.7  | 19.0            | 35.3             | 99.3  | 7.4             | 8.4              | 158.9 | 8.6             | 15.4             | 86.4  |
| 1993–1997       | 5.6             | 8.6              | 76.4  | 22.0            | 38.1             | 94.6  | 2.6             | 3.9              | 75.5  | 10.8            | 17.2             | 108.5 |
| 1998–2002       | 11.8            | 19.0             | 120.1 | 46.4            | 71.6             | 112.7 | 5.2             | 8.0              | 113.3 | 14.2            | 20.5             | 108.9 |
| 2003–2007       | 8.0             | 16.0             | 91.9  | 41.8            | 59.4             | 102.9 | 4.4             | 8.3              | 92.4  | 12.4            | 16.5             | 98.7  |
| 2008–2012       | 8.8             | 19.4             | 91.4  | 30.2            | 45.6             | 93.9  | 4.2             | 8.9              | 91.2  | 10.8            | 14.9             | 99.9  |
|                 | 25–34           |                  |       | 65–74           |                  |       | 25–34           |                  |       | 65–74           |                  |       |
| 1983–1987       | 16.6            | 23.3             | 91.2  | 9.6             | 40.8             | 93.3  | 7.2             | 10.2             | 94.6  | 9.2             | 29.0             | 92.6  |
| 1988–1992       | 10.8            | 15.8             | 82.8  | 9.2             | 34.4             | 97.5  | 5.8             | 8.5              | 97.5  | 10.0            | 26.9             | 103.2 |
| 1993–1997       | 12.6            | 17.7             | 90.8  | 13.0            | 37.7             | 118.1 | 6.0             | 8.4              | 101.4 | 6.6             | 16.2             | 82.9  |
| 1998–2002       | 18.0            | 23.5             | 87.0  | 20.6            | 47.8             | 105.0 | 11.6            | 13.9             | 120.0 | 11.4            | 22.3             | 106.0 |
| 2003–2007       | 16.6            | 23.8             | 76.6  | 17.2            | 35.5             | 82.7  | 11.6            | 14.5             | 111.7 | 8.8             | 15.8             | 84.9  |
| 2008–2012       | 15.8            | 27.4             | 84.2  | 20.2            | 36.7             | 93.0  | 9.8             | 14.9             | 103.8 | 12.0            | 18.6             | 104.7 |
|                 | 35–44           |                  |       | >74 y/o         |                  |       | 35–44           |                  |       | >74 y/o         |                  |       |
| 1983–1987       | 24.0            | 28.4             | 89.1  | 8.6             | 70.4             | 89.9  | 11.2            | 12.8             | 108.3 | 9.8             | 51.1             | 88.6  |
| 1988–1992       | 18.2            | 23.8             | 100.5 | 7.2             | 48.6             | 75.3  | 6.8             | 9.0              | 92.9  | 9.0             | 36.0             | 75.2  |
| 1993–1997       | 14.4            | 23.6             | 96.3  | 8.0             | 48.4             | 92.9  | 5.2             | 8.4              | 98.8  | 7.4             | 25.5             | 74.1  |
| 1998–2002       | 18.2            | 30.0             | 85.3  | 6.2             | 32.2             | 61.1  | 5.8             | 9.6              | 92.4  | 9.0             | 24.0             | 77.4  |
| 2003–2007       | 22.0            | 31.5             | 78.5  | 13.8            | 47.8             | 106.1 | 11.6            | 15.3             | 121.0 | 6.4             | 13.8             | 61.6  |
| 2008–2012       | 31.6            | 39.0             | 104.9 | 12.2            | 34.5             | 83.1  | 10.0            | 12.3             | 90.6  | 8.4             | 14.5             | 75.4  |

Secondary Medical Zone ID: 213

|           | Male            |                  |       |                 |                  |       | Female          |                  |       |                 |                  |       |
|-----------|-----------------|------------------|-------|-----------------|------------------|-------|-----------------|------------------|-------|-----------------|------------------|-------|
|           | Suicide         |                  |       | Suicide         |                  |       | Suicide         |                  |       | Suicide         |                  |       |
|           | Num<br>per year | Rate<br>/100,000 | × 100 | Num<br>per year | Rate<br>/100,000 | × 100 | Num<br>per year | Rate<br>/100,000 | × 100 | Num<br>per year | Rate<br>/100,000 | × 100 |
|           |                 |                  |       |                 |                  |       |                 |                  |       |                 |                  |       |
|           | Total (>10 y/o) |                  |       | 45–54           |                  |       | Total (>10 y/o) |                  |       | 45–54           |                  |       |
| 1983–1987 | 55.0            | 27.3             | 78.7  | 15.4            | 40.8             | 80.7  | 31.6            | 14.0             | 89.7  | 4.4             | 13.1             | 76.1  |
| 1988–1992 | 43.4            | 18.9             | 72.1  | 9.4             | 22.8             | 66.4  | 33.4            | 12.0             | 93.4  | 4.8             | 11.7             | 80.2  |
| 1993–1997 | 55.2            | 20.6             | 78.2  | 14.6            | 30.0             | 81.9  | 27.8            | 9.3              | 80.9  | 5.2             | 10.6             | 81.9  |
| 1998–2002 | 94.8            | 31.3             | 84.6  | 23.4            | 48.1             | 85.9  | 40.0            | 11.6             | 89.0  | 5.8             | 12.0             | 79.9  |
| 2003–2007 | 98.4            | 31.7             | 84.3  | 18.6            | 43.9             | 78.5  | 43.0            | 12.5             | 92.9  | 5.0             | 11.4             | 83.3  |
| 2008–2012 | 91.8            | 29.5             | 83.0  | 12.6            | 31.9             | 65.7  | 41.8            | 11.6             | 88.1  | 5.0             | 11.7             | 78.4  |
|           | 15–24           |                  |       | 55–64           |                  |       | 15–24           |                  |       | 55–64           |                  |       |
| 1983–1987 | 4.2             | 11.1             | 79.4  | 7.4             | 33.0             | 77.6  | 2.8             | 6.7              | 97.6  | 5.4             | 20.5             | 103.7 |
| 1988–1992 | 4.0             | 8.9              | 89.7  | 8.8             | 28.6             | 80.5  | 3.6             | 6.7              | 127.4 | 6.8             | 19.8             | 110.9 |
| 1993–1997 | 4.4             | 10.0             | 88.2  | 10.2            | 28.7             | 71.2  | 2.4             | 5.0              | 95.6  | 4.4             | 12.3             | 77.4  |
| 1998–2002 | 7.8             | 17.9             | 113.6 | 23.2            | 53.3             | 83.9  | 3.8             | 8.1              | 115.7 | 5.4             | 13.4             | 71.3  |
| 2003–2007 | 7.6             | 19.3             | 110.6 | 23.2            | 47.9             | 83.1  | 3.8             | 9.6              | 106.3 | 6.8             | 13.7             | 81.7  |
| 2008–2012 | 7.2             | 20.5             | 96.7  | 18.6            | 40.2             | 82.7  | 2.8             | 8.4              | 86.1  | 8.4             | 15.4             | 103.6 |
|           | 25–34           |                  |       | 65–74           |                  |       | 25–34           |                  |       | 65–74           |                  |       |
| 1983–1987 | 7.8             | 22.5             | 87.8  | 4.0             | 35.4             | 80.9  | 4.2             | 10.8             | 100.7 | 5.4             | 32.5             | 104.0 |
| 1988–1992 | 4.4             | 12.7             | 66.2  | 4.0             | 27.7             | 78.7  | 2.2             | 6.3              | 72.9  | 5.2             | 25.8             | 99.0  |
| 1993–1997 | 8.2             | 18.3             | 93.8  | 5.4             | 25.9             | 81.3  | 3.2             | 7.1              | 85.6  | 3.4             | 14.5             | 74.6  |
| 1998–2002 | 11.0            | 22.8             | 84.6  | 10.8            | 38.7             | 85.1  | 6.2             | 11.5             | 99.4  | 7.4             | 22.4             | 106.8 |
| 2003–2007 | 13.4            | 29.4             | 94.9  | 11.2            | 33.3             | 77.6  | 9.2             | 17.0             | 130.4 | 5.8             | 15.9             | 85.2  |
| 2008–2012 | 12.2            | 32.0             | 98.1  | 15.8            | 38.6             | 97.8  | 6.8             | 15.7             | 109.3 | 8.2             | 17.9             | 100.8 |
|           | 35–44           |                  |       | >74 y/o         |                  |       | 35–44           |                  |       | >74 y/o         |                  |       |
| 1983–1987 | 10.8            | 23.6             | 74.1  | 5.2             | 79.7             | 101.8 | 5.0             | 10.3             | 87.6  | 4.4             | 46.0             | 79.7  |
| 1988–1992 | 9.0             | 19.7             | 83.1  | 3.6             | 46.0             | 71.3  | 4.4             | 9.1              | 93.8  | 6.4             | 44.0             | 91.9  |
| 1993–1997 | 8.8             | 20.9             | 85.1  | 3.6             | 37.2             | 71.5  | 4.4             | 9.3              | 109.1 | 4.8             | 26.5             | 77.0  |
| 1998–2002 | 13.2            | 30.0             | 85.0  | 4.8             | 37.6             | 71.3  | 4.0             | 8.9              | 86.4  | 7.2             | 29.6             | 95.5  |
| 2003–2007 | 16.8            | 34.8             | 86.8  | 7.6             | 39.3             | 87.2  | 8.0             | 14.6             | 115.7 | 4.2             | 14.0             | 62.3  |
| 2008–2012 | 15.8            | 30.7             | 82.5  | 9.0             | 35.0             | 84.3  | 5.2             | 10.2             | 75.1  | 5.4             | 14.0             | 72.9  |

Secondary Medical Zone ID: 214

|                 | Male            |                  |       |                 |                  |       | Female          |                  |       |                 |                  |       |
|-----------------|-----------------|------------------|-------|-----------------|------------------|-------|-----------------|------------------|-------|-----------------|------------------|-------|
|                 | Suicide         |                  |       | Suicide         |                  |       | Suicide         |                  |       | Suicide         |                  |       |
|                 | Num<br>per year | Rate<br>/100,000 | × 100 | Num<br>per year | Rate<br>/100,000 | × 100 | Num<br>per year | Rate<br>/100,000 | × 100 | Num<br>per year | Rate<br>/100,000 | × 100 |
|                 |                 |                  |       |                 |                  |       |                 |                  |       |                 |                  |       |
| Total (>10 y/o) | 45–54           | Total (>10 y/o)  | 45–54 |                 |                  |       |                 |                  |       |                 |                  |       |
| 1983–1987       | 72.4            | 30.6             | 92.1  | 20.8            | 50.1             | 99.1  | 37.8            | 14.6             | 95.8  | 5.4             | 14.6             | 84.6  |
| 1988–1992       | 67.0            | 24.6             | 100.4 | 16.4            | 33.1             | 96.2  | 37.8            | 12.5             | 98.2  | 7.6             | 15.5             | 106.0 |
| 1993–1997       | 71.0            | 23.3             | 91.5  | 17.2            | 30.6             | 83.6  | 32.0            | 9.5              | 86.6  | 6.0             | 11.0             | 85.3  |
| 1998–2002       | 118.8           | 35.7             | 99.3  | 29.8            | 54.6             | 97.6  | 43.8            | 11.8             | 94.4  | 8.6             | 15.3             | 101.4 |
| 2003–2007       | 114.8           | 34.4             | 94.7  | 22.0            | 49.4             | 88.3  | 47.4            | 13.0             | 102.1 | 7.0             | 14.6             | 106.6 |
| 2008–2012       | 108.8           | 33.3             | 96.2  | 18.2            | 45.0             | 92.5  | 45.0            | 12.3             | 96.9  | 6.6             | 15.2             | 101.8 |
|                 | 15–24           |                  |       | 55–64           |                  |       | 15–24           |                  |       | 55–64           |                  |       |
| 1983–1987       | 5.8             | 13.6             | 97.6  | 8.6             | 34.7             | 81.6  | 2.8             | 6.4              | 94.2  | 4.2             | 16.3             | 82.6  |
| 1988–1992       | 7.2             | 12.9             | 130.3 | 11.6            | 34.3             | 96.6  | 1.2             | 3.1              | 59.4  | 5.4             | 16.3             | 91.5  |
| 1993–1997       | 6.2             | 11.8             | 104.0 | 15.2            | 37.6             | 93.4  | 3.8             | 6.5              | 125.3 | 5.0             | 13.2             | 82.7  |
| 1998–2002       | 8.4             | 18.0             | 113.8 | 28.8            | 60.2             | 94.8  | 2.0             | 5.3              | 74.8  | 9.2             | 19.1             | 101.6 |
| 2003–2007       | 7.0             | 17.9             | 102.5 | 26.0            | 48.9             | 84.8  | 3.6             | 9.3              | 103.0 | 9.2             | 16.6             | 98.9  |
| 2008–2012       | 8.0             | 22.2             | 104.8 | 19.4            | 39.1             | 80.5  | 1.8             | 6.5              | 67.4  | 9.0             | 16.0             | 107.0 |
|                 | 25–34           |                  |       | 65–74           |                  |       | 25–34           |                  |       | 65–74           |                  |       |
| 1983–1987       | 9.4             | 23.2             | 90.9  | 5.0             | 38.0             | 86.8  | 4.0             | 9.6              | 89.2  | 6.0             | 31.4             | 100.5 |
| 1988–1992       | 9.0             | 21.7             | 113.7 | 6.0             | 35.8             | 101.5 | 4.8             | 10.5             | 121.2 | 5.0             | 22.9             | 88.0  |
| 1993–1997       | 7.2             | 15.8             | 80.7  | 6.6             | 29.0             | 90.8  | 3.8             | 7.9              | 95.2  | 4.2             | 15.9             | 81.6  |
| 1998–2002       | 14.8            | 27.3             | 101.2 | 12.4            | 42.5             | 93.6  | 6.6             | 11.9             | 103.0 | 5.4             | 17.4             | 82.8  |
| 2003–2007       | 17.4            | 33.9             | 109.3 | 16.8            | 47.2             | 109.9 | 6.4             | 12.7             | 97.3  | 8.0             | 20.6             | 110.4 |
| 2008–2012       | 15.0            | 34.4             | 105.5 | 17.0            | 40.2             | 101.9 | 5.8             | 13.9             | 97.1  | 7.8             | 17.6             | 99.0  |
|                 | 35–44           |                  |       | >74 y/o         |                  |       | 35–44           |                  |       | >74 y/o         |                  |       |
| 1983–1987       | 17.0            | 29.4             | 92.5  | 5.6             | 79.3             | 101.3 | 8.6             | 14.0             | 118.7 | 6.8             | 59.1             | 102.4 |
| 1988–1992       | 10.6            | 20.0             | 84.4  | 6.2             | 66.4             | 102.9 | 6.4             | 11.0             | 113.8 | 7.4             | 46.2             | 96.6  |
| 1993–1997       | 12.0            | 25.3             | 103.1 | 5.8             | 52.3             | 100.5 | 2.8             | 6.6              | 77.1  | 6.2             | 30.3             | 88.0  |
| 1998–2002       | 15.6            | 35.0             | 99.3  | 8.6             | 60.0             | 113.8 | 3.2             | 8.0              | 76.9  | 8.8             | 33.8             | 109.0 |
| 2003–2007       | 15.0            | 32.5             | 81.0  | 9.8             | 50.3             | 111.6 | 6.8             | 13.7             | 108.6 | 5.8             | 18.5             | 82.3  |
| 2008–2012       | 19.0            | 36.1             | 97.0  | 11.8            | 46.9             | 113.2 | 5.6             | 11.4             | 84.2  | 8.0             | 20.4             | 105.9 |

Secondary Medical Zone ID: 215

|           | Male            |          |       |          |          |       | Female          |          |       |          |          |       |
|-----------|-----------------|----------|-------|----------|----------|-------|-----------------|----------|-------|----------|----------|-------|
|           | Suicide         |          |       | Suicide  |          |       | Suicide         |          |       | Suicide  |          |       |
|           | Num             | Rate     | × 100 | Num      | Rate     | × 100 | Num             | Rate     | × 100 | Num      | Rate     | × 100 |
|           | per year        | /100,000 |       | per year | /100,000 |       | per year        | /100,000 |       | per year | /100,000 |       |
|           | Total (>10 y/o) |          |       | 45–54    |          |       | Total (>10 y/o) |          |       | 45–54    |          |       |
| 1983–1987 | 40.0            | 33.9     | 105.3 | 10.0     | 52.9     | 104.6 | 25.8            | 17.3     | 119.6 | 4.2      | 20.5     | 118.8 |
| 1988–1992 | 31.4            | 24.9     | 101.1 | 4.8      | 26.4     | 76.8  | 26.2            | 15.1     | 127.8 | 3.8      | 16.8     | 115.2 |
| 1993–1997 | 39.4            | 27.4     | 114.8 | 8.6      | 37.4     | 102.2 | 21.8            | 11.5     | 118.7 | 2.6      | 12.1     | 94.0  |
| 1998–2002 | 47.0            | 34.6     | 94.2  | 9.2      | 44.4     | 79.4  | 26.0            | 13.9     | 119.0 | 2.8      | 13.7     | 90.9  |
| 2003–2007 | 51.8            | 37.8     | 103.4 | 11.2     | 58.5     | 104.6 | 20.0            | 12.7     | 100.5 | 3.4      | 15.7     | 114.3 |
| 2008–2012 | 53.2            | 38.1     | 113.9 | 9.4      | 54.0     | 111.1 | 18.4            | 11.7     | 96.4  | 0.8      | 9.7      | 64.7  |
|           | 15–24           |          |       | 55–64    |          |       | 15–24           |          |       | 55–64    |          |       |
| 1983–1987 | 2.2             | 13.3     | 95.2  | 7.4      | 47.9     | 112.7 | 0.8             | 5.6      | 82.5  | 3.4      | 20.3     | 102.8 |
| 1988–1992 | 2.6             | 11.6     | 116.7 | 8.8      | 46.8     | 131.7 | 1.8             | 6.9      | 131.2 | 3.8      | 19.9     | 111.4 |
| 1993–1997 | 2.4             | 11.8     | 104.1 | 9.4      | 48.4     | 120.3 | 0.4             | 3.6      | 69.1  | 3.8      | 18.8     | 118.2 |
| 1998–2002 | 2.8             | 15.9     | 100.9 | 10.8     | 57.0     | 89.7  | 1.4             | 7.4      | 105.1 | 7.2      | 28.2     | 149.8 |
| 2003–2007 | 3.2             | 19.3     | 110.7 | 11.2     | 52.8     | 91.4  | 1.6             | 9.8      | 109.4 | 3.6      | 16.5     | 98.3  |
| 2008–2012 | 2.4             | 19.6     | 92.2  | 9.6      | 45.6     | 93.9  | 1.4             | 10.1     | 104.3 | 2.6      | 13.3     | 89.0  |
|           | 25–34           |          |       | 65–74    |          |       | 25–34           |          |       | 65–74    |          |       |
| 1983–1987 | 4.6             | 26.2     | 102.5 | 3.6      | 42.8     | 97.7  | 2.2             | 11.4     | 106.3 | 4.4      | 35.2     | 112.6 |
| 1988–1992 | 4.8             | 26.3     | 137.7 | 2.8      | 30.4     | 86.4  | 1.4             | 8.5      | 98.0  | 5.2      | 34.6     | 132.6 |
| 1993–1997 | 3.2             | 19.2     | 98.3  | 5.2      | 37.8     | 118.7 | 2.0             | 9.8      | 117.6 | 4.0      | 23.6     | 120.9 |
| 1998–2002 | 4.6             | 25.8     | 95.4  | 6.0      | 41.5     | 91.2  | 3.4             | 14.7     | 127.1 | 3.4      | 20.5     | 97.5  |
| 2003–2007 | 6.2             | 33.7     | 108.6 | 6.8      | 42.6     | 99.4  | 1.0             | 9.3      | 71.5  | 2.8      | 17.2     | 92.2  |
| 2008–2012 | 7.6             | 42.3     | 130.0 | 8.6      | 46.5     | 117.6 | 1.0             | 10.9     | 76.3  | 4.0      | 19.8     | 111.1 |
|           | 35–44           |          |       | >74 y/o  |          |       | 35–44           |          |       | >74 y/o  |          |       |
| 1983–1987 | 9.4             | 38.7     | 121.5 | 2.8      | 59.6     | 76.1  | 4.0             | 14.9     | 126.1 | 6.6      | 77.2     | 133.9 |
| 1988–1992 | 4.8             | 22.2     | 93.8  | 2.8      | 48.9     | 75.9  | 4.0             | 13.8     | 143.2 | 6.2      | 55.4     | 115.8 |
| 1993–1997 | 6.2             | 30.1     | 122.9 | 4.2      | 57.2     | 109.8 | 0.4             | 5.1      | 59.7  | 8.4      | 58.9     | 171.0 |
| 1998–2002 | 7.8             | 42.3     | 120.1 | 5.6      | 61.8     | 117.1 | 1.6             | 9.7      | 93.5  | 6.2      | 37.3     | 120.0 |
| 2003–2007 | 7.4             | 42.7     | 106.5 | 5.4      | 47.5     | 105.4 | 3.2             | 15.4     | 121.8 | 4.4      | 22.6     | 100.6 |
| 2008–2012 | 9.0             | 44.4     | 119.4 | 6.6      | 46.5     | 112.0 | 2.0             | 12.3     | 90.7  | 6.6      | 27.2     | 141.6 |



Secondary Medical Zone ID: 216

|                 | Male            |                  |       |                 |                  |       | Female          |                  |       |                 |                  |       |
|-----------------|-----------------|------------------|-------|-----------------|------------------|-------|-----------------|------------------|-------|-----------------|------------------|-------|
|                 | Suicide         |                  |       | Suicide         |                  |       | Suicide         |                  |       | Suicide         |                  |       |
|                 | Num<br>per year | Rate<br>/100,000 | × 100 | Num<br>per year | Rate<br>/100,000 | × 100 | Num<br>per year | Rate<br>/100,000 | × 100 | Num<br>per year | Rate<br>/100,000 | × 100 |
|                 |                 |                  |       |                 |                  |       |                 |                  |       |                 |                  |       |
| Total (>10 y/o) | 45–54           | Total (>10 y/o)  | 45–54 |                 |                  |       |                 |                  |       |                 |                  |       |
| 1983–1987       | 81.0            | 36.8             | 116.0 | 26.0            | 70.6             | 139.7 | 36.0            | 14.7             | 96.3  | 5.4             | 15.7             | 90.8  |
| 1988–1992       | 52.8            | 23.2             | 93.9  | 16.6            | 41.6             | 121.0 | 31.8            | 11.9             | 91.6  | 6.4             | 15.6             | 106.9 |
| 1993–1997       | 62.6            | 24.7             | 99.8  | 14.4            | 33.6             | 92.0  | 30.2            | 10.2             | 94.0  | 5.0             | 11.7             | 90.8  |
| 1998–2002       | 112.0           | 41.0             | 117.5 | 26.6            | 62.4             | 111.5 | 36.4            | 12.3             | 93.7  | 6.6             | 15.4             | 102.0 |
| 2003–2007       | 99.4            | 37.5             | 103.1 | 20.2            | 56.5             | 101.1 | 39.0            | 13.0             | 101.8 | 3.8             | 11.5             | 84.1  |
| 2008–2012       | 97.6            | 36.6             | 108.1 | 16.4            | 48.9             | 100.6 | 37.4            | 12.6             | 98.5  | 6.0             | 16.6             | 111.2 |
|                 | 15–24           |                  |       | 55–64           |                  |       | 15–24           |                  |       | 55–64           |                  |       |
| 1983–1987       | 5.0             | 14.1             | 101.1 | 11.6            | 45.8             | 107.8 | 2.6             | 6.8              | 99.2  | 5.2             | 18.6             | 94.5  |
| 1988–1992       | 4.2             | 10.2             | 103.5 | 8.0             | 27.9             | 78.5  | 1.4             | 3.9              | 74.5  | 5.6             | 17.5             | 98.0  |
| 1993–1997       | 5.0             | 12.1             | 106.8 | 15.2            | 44.8             | 111.2 | 1.0             | 3.4              | 64.7  | 6.4             | 17.6             | 110.7 |
| 1998–2002       | 8.0             | 20.8             | 131.8 | 30.0            | 79.8             | 125.6 | 1.6             | 5.5              | 78.3  | 7.6             | 19.4             | 102.9 |
| 2003–2007       | 7.6             | 22.0             | 125.9 | 22.4            | 55.1             | 95.4  | 4.0             | 11.7             | 130.4 | 7.6             | 17.3             | 103.3 |
| 2008–2012       | 8.0             | 25.7             | 121.3 | 19.4            | 48.6             | 100.0 | 3.0             | 10.4             | 107.5 | 6.8             | 15.8             | 105.9 |
|                 | 25–34           |                  |       | 65–74           |                  |       | 25–34           |                  |       | 65–74           |                  |       |
| 1983–1987       | 10.4            | 28.6             | 111.9 | 6.2             | 43.4             | 99.0  | 3.4             | 9.7              | 90.5  | 4.6             | 24.4             | 78.2  |
| 1988–1992       | 4.4             | 14.2             | 74.1  | 4.8             | 31.1             | 88.1  | 3.8             | 10.0             | 115.5 | 5.0             | 22.5             | 86.2  |
| 1993–1997       | 5.2             | 15.1             | 77.3  | 7.8             | 36.2             | 113.5 | 3.0             | 7.9              | 94.5  | 4.0             | 15.9             | 81.7  |
| 1998–2002       | 12.2            | 28.8             | 106.6 | 14.0            | 52.9             | 116.3 | 4.2             | 10.4             | 89.6  | 5.8             | 19.7             | 93.7  |
| 2003–2007       | 15.0            | 36.4             | 117.4 | 12.4            | 43.2             | 100.6 | 5.6             | 13.7             | 105.0 | 6.0             | 18.3             | 98.5  |
| 2008–2012       | 11.2            | 33.2             | 101.9 | 14.4            | 44.0             | 111.3 | 3.8             | 12.4             | 86.5  | 6.0             | 17.0             | 95.2  |
|                 | 35–44           |                  |       | >74 y/o         |                  |       | 35–44           |                  |       | >74 y/o         |                  |       |
| 1983–1987       | 15.4            | 33.6             | 105.7 | 6.2             | 80.9             | 103.3 | 5.0             | 11.1             | 93.8  | 9.6             | 74.3             | 128.8 |
| 1988–1992       | 10.2            | 24.0             | 101.1 | 4.4             | 49.3             | 76.5  | 4.0             | 9.4              | 97.7  | 5.6             | 35.2             | 73.5  |
| 1993–1997       | 8.8             | 23.9             | 97.4  | 5.8             | 53.1             | 101.9 | 3.2             | 8.6              | 101.0 | 7.6             | 36.4             | 105.7 |
| 1998–2002       | 15.0            | 41.2             | 117.1 | 6.2             | 48.3             | 91.6  | 4.8             | 12.4             | 119.8 | 5.2             | 21.6             | 69.5  |
| 2003–2007       | 14.0            | 38.1             | 95.0  | 7.4             | 43.1             | 95.7  | 4.4             | 11.8             | 93.8  | 7.0             | 22.6             | 100.6 |
| 2008–2012       | 18.4            | 42.9             | 115.3 | 9.4             | 43.1             | 103.9 | 3.4             | 9.9              | 73.0  | 8.4             | 22.5             | 116.8 |

Secondary Medical Zone ID: 217

|           | Male            |                  |       |                 |                  |       | Female          |                  |       |                 |                  |       |
|-----------|-----------------|------------------|-------|-----------------|------------------|-------|-----------------|------------------|-------|-----------------|------------------|-------|
|           | Suicide         |                  |       | Suicide         |                  |       | Suicide         |                  |       | Suicide         |                  |       |
|           | Num<br>per year | Rate<br>/100,000 | × 100 | Num<br>per year | Rate<br>/100,000 | × 100 | Num<br>per year | Rate<br>/100,000 | × 100 | Num<br>per year | Rate<br>/100,000 | × 100 |
|           |                 |                  |       |                 |                  |       |                 |                  |       |                 |                  |       |
|           | Total (>10 y/o) |                  |       | 45–54           |                  |       | Total (>10 y/o) |                  |       | 45–54           |                  |       |
| 1983–1987 | 33.8            | 30.1             | 88.6  | 8.2             | 45.1             | 89.3  | 22.6            | 15.5             | 102.0 | 3.2             | 17.1             | 99.0  |
| 1988–1992 | 29.2            | 24.0             | 95.1  | 5.0             | 27.7             | 80.7  | 19.0            | 12.2             | 94.8  | 2.6             | 13.8             | 94.6  |
| 1993–1997 | 30.6            | 23.6             | 93.2  | 7.4             | 34.0             | 92.9  | 13.0            | 9.4              | 77.2  | 2.8             | 12.7             | 98.4  |
| 1998–2002 | 45.0            | 34.5             | 93.4  | 12.4            | 56.1             | 100.3 | 19.2            | 12.2             | 93.5  | 2.0             | 11.9             | 78.8  |
| 2003–2007 | 51.2            | 37.3             | 106.3 | 10.8            | 58.7             | 104.9 | 20.6            | 13.3             | 104.0 | 2.6             | 13.8             | 100.6 |
| 2008–2012 | 42.2            | 34.3             | 97.1  | 8.2             | 51.4             | 105.8 | 17.8            | 12.5             | 95.9  | 2.4             | 14.9             | 100.0 |
|           | 15–24           |                  |       | 55–64           |                  |       | 15–24           |                  |       | 55–64           |                  |       |
| 1983–1987 | 3.0             | 16.2             | 116.0 | 4.6             | 34.0             | 80.0  | 1.2             | 6.6              | 97.2  | 3.2             | 18.7             | 95.0  |
| 1988–1992 | 2.4             | 11.3             | 113.9 | 4.8             | 29.8             | 83.8  | 1.2             | 5.6              | 106.6 | 2.6             | 15.6             | 87.3  |
| 1993–1997 | 1.8             | 10.3             | 91.3  | 5.0             | 31.8             | 78.9  | 0.6             | 4.2              | 79.9  | 2.0             | 12.7             | 80.1  |
| 1998–2002 | 2.6             | 15.6             | 98.4  | 11.6            | 62.4             | 98.2  | 1.0             | 6.5              | 93.0  | 3.2             | 17.5             | 92.8  |
| 2003–2007 | 2.6             | 17.9             | 102.4 | 13.4            | 61.9             | 107.3 | 3.0             | 14.9             | 165.7 | 2.8             | 14.7             | 87.5  |
| 2008–2012 | 2.8             | 22.0             | 103.7 | 9.0             | 44.0             | 90.6  | 1.0             | 9.0              | 93.0  | 2.4             | 12.8             | 86.2  |
|           | 25–34           |                  |       | 65–74           |                  |       | 25–34           |                  |       | 65–74           |                  |       |
| 1983–1987 | 3.6             | 21.7             | 84.8  | 2.2             | 30.3             | 69.3  | 3.0             | 13.7             | 127.4 | 2.8             | 24.3             | 77.7  |
| 1988–1992 | 4.2             | 24.2             | 126.7 | 3.6             | 35.1             | 99.6  | 1.2             | 8.0              | 92.6  | 3.0             | 22.0             | 84.3  |
| 1993–1997 | 3.4             | 20.9             | 106.8 | 3.6             | 29.0             | 90.9  | 0.4             | 5.7              | 68.1  | 2.0             | 14.3             | 73.4  |
| 1998–2002 | 3.4             | 22.6             | 83.8  | 6.0             | 42.0             | 92.2  | 1.8             | 11.0             | 94.8  | 3.6             | 20.7             | 98.5  |
| 2003–2007 | 5.4             | 31.5             | 101.5 | 8.4             | 51.4             | 119.8 | 2.6             | 14.2             | 109.3 | 3.4             | 19.0             | 101.9 |
| 2008–2012 | 6.4             | 38.7             | 118.8 | 6.4             | 39.2             | 99.2  | 1.6             | 13.0             | 90.6  | 2.4             | 15.3             | 85.7  |
|           | 35–44           |                  |       | >74 y/o         |                  |       | 35–44           |                  |       | >74 y/o         |                  |       |
| 1983–1987 | 7.2             | 31.0             | 97.5  | 4.8             | 85.3             | 109.0 | 2.6             | 11.5             | 97.7  | 6.6             | 71.3             | 123.5 |
| 1988–1992 | 5.4             | 24.0             | 101.5 | 3.6             | 56.9             | 88.3  | 2.2             | 9.8              | 101.1 | 6.0             | 51.4             | 107.3 |
| 1993–1997 | 3.6             | 20.7             | 84.6  | 5.4             | 68.5             | 131.6 | 2.6             | 11.2             | 131.9 | 2.6             | 20.9             | 60.7  |
| 1998–2002 | 5.6             | 34.8             | 98.8  | 3.2             | 41.7             | 79.1  | 2.2             | 11.8             | 113.8 | 5.2             | 31.0             | 99.8  |
| 2003–2007 | 5.4             | 35.8             | 89.3  | 5.0             | 46.0             | 102.2 | 1.8             | 11.9             | 94.2  | 4.4             | 22.2             | 98.7  |
| 2008–2012 | 4.8             | 31.8             | 85.4  | 4.6             | 37.2             | 89.6  | 2.8             | 14.7             | 108.7 | 5.2             | 22.1             | 115.1 |

Secondary Medical Zone ID: 218

|           | Male            |          |       |          |          |       | Female          |          |       |          |          |       |
|-----------|-----------------|----------|-------|----------|----------|-------|-----------------|----------|-------|----------|----------|-------|
|           | Suicide         |          |       | Suicide  |          |       | Suicide         |          |       | Suicide  |          |       |
|           | Num             | Rate     | × 100 | Num      | Rate     | × 100 | Num             | Rate     | × 100 | Num      | Rate     | × 100 |
|           | per year        | /100,000 |       | per year | /100,000 |       | per year        | /100,000 |       | per year | /100,000 |       |
|           | Total (>10 y/o) |          |       | 45–54    |          |       | Total (>10 y/o) |          |       | 45–54    |          |       |
| 1983–1987 | 35.0            | 35.4     | 114.5 | 8.4      | 58.1     | 114.8 | 17.2            | 14.6     | 95.9  | 2.4      | 16.8     | 97.3  |
| 1988–1992 | 20.8            | 22.6     | 89.7  | 4.0      | 32.0     | 93.1  | 18.0            | 13.2     | 108.5 | 1.6      | 13.4     | 91.9  |
| 1993–1997 | 27.2            | 26.9     | 110.0 | 4.4      | 33.1     | 90.4  | 13.0            | 10.1     | 95.1  | 1.0      | 10.4     | 80.7  |
| 1998–2002 | 34.8            | 36.1     | 100.6 | 9.0      | 59.9     | 107.0 | 12.0            | 11.0     | 83.1  | 2.0      | 14.7     | 97.4  |
| 2003–2007 | 38.8            | 40.6     | 114.5 | 7.8      | 58.8     | 105.2 | 14.4            | 12.7     | 102.7 | 1.0      | 11.3     | 82.6  |
| 2008–2012 | 34.6            | 38.3     | 113.7 | 7.4      | 59.3     | 122.0 | 14.4            | 14.1     | 107.2 | 1.4      | 13.9     | 92.9  |
|           | 15–24           |          |       | 55–64    |          |       | 15–24           |          |       | 55–64    |          |       |
| 1983–1987 | 0.4             | 8.9      | 64.0  | 6.2      | 44.6     | 105.1 | 0.8             | 7.1      | 103.6 | 2.4      | 17.2     | 87.3  |
| 1988–1992 | 1.0             | 9.8      | 99.1  | 5.2      | 35.9     | 101.2 | 1.0             | 6.7      | 126.3 | 4.0      | 22.0     | 123.0 |
| 1993–1997 | 1.8             | 13.3     | 117.7 | 6.0      | 43.8     | 108.7 | 0.6             | 5.4      | 103.8 | 1.8      | 14.0     | 88.3  |
| 1998–2002 | 1.8             | 17.0     | 107.4 | 7.4      | 60.9     | 95.9  | 0.0             | 5.0      | 70.5  | 1.0      | 13.8     | 73.2  |
| 2003–2007 | 2.8             | 23.6     | 135.2 | 8.0      | 58.7     | 101.6 | 0.8             | 9.5      | 105.1 | 1.2      | 13.3     | 79.7  |
| 2008–2012 | 1.8             | 23.4     | 110.4 | 7.4      | 50.8     | 104.6 | 1.4             | 13.5     | 138.7 | 2.0      | 14.6     | 98.1  |
|           | 25–34           |          |       | 65–74    |          |       | 25–34           |          |       | 65–74    |          |       |
| 1983–1987 | 5.8             | 37.5     | 146.6 | 4.2      | 48.8     | 111.5 | 0.8             | 8.7      | 80.8  | 3.6      | 30.9     | 99.0  |
| 1988–1992 | 1.6             | 16.5     | 86.5  | 3.2      | 34.5     | 98.0  | 0.8             | 8.1      | 93.3  | 2.2      | 19.5     | 74.9  |
| 1993–1997 | 2.2             | 20.5     | 105.1 | 4.6      | 37.1     | 116.3 | 0.4             | 6.8      | 81.5  | 3.8      | 24.1     | 123.7 |
| 1998–2002 | 2.6             | 25.8     | 95.4  | 5.2      | 42.8     | 94.1  | 0.2             | 8.3      | 71.8  | 3.8      | 23.9     | 113.9 |
| 2003–2007 | 3.2             | 31.2     | 100.8 | 6.2      | 50.2     | 116.9 | 1.4             | 13.6     | 104.9 | 2.4      | 18.1     | 97.3  |
| 2008–2012 | 3.0             | 33.4     | 102.7 | 4.8      | 42.6     | 107.7 | 1.6             | 16.1     | 112.7 | 2.6      | 19.2     | 107.6 |
|           | 35–44           |          |       | >74 y/o  |          |       | 35–44           |          |       | >74 y/o  |          |       |
| 1983–1987 | 5.0             | 33.5     | 105.3 | 5.0      | 87.2     | 111.3 | 0.6             | 8.5      | 71.8  | 6.6      | 73.5     | 127.4 |
| 1988–1992 | 2.0             | 17.3     | 72.9  | 3.8      | 61.0     | 94.6  | 1.6             | 10.3     | 106.4 | 6.8      | 61.1     | 127.6 |
| 1993–1997 | 4.8             | 31.9     | 130.0 | 3.4      | 49.7     | 95.5  | 0.8             | 7.5      | 88.6  | 4.6      | 35.9     | 104.3 |
| 1998–2002 | 4.2             | 35.7     | 101.3 | 4.2      | 51.1     | 96.9  | 0.8             | 8.9      | 86.5  | 4.2      | 28.3     | 91.0  |
| 2003–2007 | 6.0             | 51.6     | 128.7 | 4.8      | 46.2     | 102.5 | 2.4             | 16.3     | 129.2 | 5.2      | 28.0     | 124.9 |
| 2008–2012 | 5.2             | 43.1     | 115.9 | 5.0      | 42.1     | 101.5 | 2.0             | 15.6     | 115.3 | 3.4      | 17.8     | 92.7  |

Secondary Medical Zone ID: 219

|           | Male            |          |       |          |          |       | Female          |          |       |          |          |       |
|-----------|-----------------|----------|-------|----------|----------|-------|-----------------|----------|-------|----------|----------|-------|
|           | Suicide         |          |       | Suicide  |          |       | Suicide         |          |       | Suicide  |          |       |
|           | Num             | Rate     | × 100 | Num      | Rate     | × 100 | Num             | Rate     | × 100 | Num      | Rate     | × 100 |
|           | per year        | /100,000 |       | per year | /100,000 |       | per year        | /100,000 |       | per year | /100,000 |       |
|           | Total (>10 y/o) |          |       | 45–54    |          |       | Total (>10 y/o) |          |       | 45–54    |          |       |
| 1983–1987 | 19.2            | 35.0     | 114.0 | 3.8      | 51.7     | 102.3 | 11.4            | 16.0     | 109.4 | 1.4      | 17.3     | 100.5 |
| 1988–1992 | 16.2            | 27.0     | 119.1 | 3.2      | 40.2     | 117.1 | 10.8            | 13.5     | 112.8 | 1.6      | 16.5     | 113.2 |
| 1993–1997 | 14.8            | 25.7     | 105.9 | 2.0      | 31.0     | 84.8  | 8.4             | 11.2     | 104.0 | 1.2      | 13.5     | 104.6 |
| 1998–2002 | 23.6            | 37.6     | 114.2 | 5.6      | 60.9     | 108.8 | 12.4            | 13.8     | 123.0 | 1.2      | 14.8     | 98.6  |
| 2003–2007 | 24.0            | 40.9     | 117.9 | 7.4      | 82.4     | 147.3 | 8.2             | 12.3     | 99.2  | 1.2      | 14.3     | 104.0 |
| 2008–2012 | 22.0            | 37.5     | 116.7 | 5.2      | 63.4     | 130.5 | 9.4             | 13.3     | 109.9 | 1.2      | 15.6     | 104.8 |
|           | 15–24           |          |       | 55–64    |          |       | 15–24           |          |       | 55–64    |          |       |
| 1983–1987 | 1.2             | 16.8     | 120.2 | 3.0      | 40.5     | 95.2  | 0.4             | 6.9      | 101.1 | 1.8      | 19.9     | 101.1 |
| 1988–1992 | 0.8             | 10.7     | 108.3 | 3.2      | 37.8     | 106.6 | 0.4             | 5.5      | 105.2 | 2.0      | 19.7     | 110.1 |
| 1993–1997 | 0.6             | 10.9     | 96.0  | 5.4      | 57.0     | 141.7 | 0.2             | 4.7      | 90.5  | 2.0      | 19.3     | 121.3 |
| 1998–2002 | 1.2             | 16.9     | 107.3 | 4.8      | 65.6     | 103.2 | 0.2             | 6.2      | 88.4  | 2.0      | 21.0     | 111.6 |
| 2003–2007 | 0.6             | 15.8     | 90.7  | 5.0      | 59.6     | 103.3 | 0.0             | 6.6      | 73.4  | 0.8      | 14.6     | 87.3  |
| 2008–2012 | 0.8             | 20.0     | 94.5  | 4.8      | 51.7     | 106.4 | 0.4             | 9.4      | 97.3  | 0.6      | 12.6     | 84.7  |
|           | 25–34           |          |       | 65–74    |          |       | 25–34           |          |       | 65–74    |          |       |
| 1983–1987 | 1.2             | 22.5     | 88.2  | 2.8      | 52.2     | 119.2 | 0.6             | 10.3     | 95.4  | 1.8      | 29.2     | 93.4  |
| 1988–1992 | 1.6             | 22.8     | 119.2 | 2.4      | 39.7     | 112.8 | 0.6             | 9.0      | 103.7 | 1.8      | 25.1     | 96.2  |
| 1993–1997 | 0.6             | 16.4     | 83.9  | 1.4      | 25.5     | 80.0  | 0.6             | 8.7      | 104.6 | 1.6      | 19.2     | 98.4  |
| 1998–2002 | 1.6             | 26.7     | 99.0  | 5.4      | 60.8     | 133.8 | 0.6             | 11.1     | 95.8  | 3.4      | 29.9     | 142.4 |
| 2003–2007 | 2.6             | 35.6     | 114.8 | 3.8      | 50.4     | 117.6 | 0.4             | 11.4     | 87.4  | 1.4      | 18.3     | 98.0  |
| 2008–2012 | 1.8             | 32.6     | 100.2 | 2.8      | 41.1     | 104.1 | 1.2             | 16.4     | 114.3 | 2.2      | 21.7     | 122.2 |
|           | 35–44           |          |       | >74 y/o  |          |       | 35–44           |          |       | >74 y/o  |          |       |
| 1983–1987 | 4.2             | 43.3     | 136.0 | 3.0      | 88.5     | 112.9 | 1.8             | 15.2     | 129.0 | 3.6      | 69.9     | 121.2 |
| 1988–1992 | 2.0             | 24.1     | 101.8 | 3.0      | 77.9     | 120.7 | 0.6             | 9.1      | 94.4  | 3.8      | 59.3     | 124.0 |
| 1993–1997 | 2.0             | 25.5     | 103.9 | 2.6      | 62.0     | 119.0 | 1.2             | 10.7     | 126.4 | 1.6      | 25.7     | 74.6  |
| 1998–2002 | 2.2             | 34.0     | 96.7  | 2.8      | 57.4     | 108.8 | 1.4             | 13.2     | 127.2 | 3.6      | 38.9     | 125.4 |
| 2003–2007 | 2.6             | 41.5     | 103.7 | 2.0      | 38.6     | 85.8  | 1.4             | 15.0     | 118.4 | 3.0      | 27.3     | 121.7 |
| 2008–2012 | 2.8             | 40.1     | 107.7 | 3.6      | 48.8     | 117.7 | 0.6             | 12.6     | 92.9  | 3.2      | 24.7     | 128.7 |

Secondary Medical Zone ID: 220

|                 | Male            |                  |       |                 |                  |       | Female          |                  |       |                 |                  |       |
|-----------------|-----------------|------------------|-------|-----------------|------------------|-------|-----------------|------------------|-------|-----------------|------------------|-------|
|                 | Suicide         |                  |       | Suicide         |                  |       | Suicide         |                  |       | Suicide         |                  |       |
|                 | Num<br>per year | Rate<br>/100,000 | × 100 | Num<br>per year | Rate<br>/100,000 | × 100 | Num<br>per year | Rate<br>/100,000 | × 100 | Num<br>per year | Rate<br>/100,000 | × 100 |
|                 |                 |                  |       |                 |                  |       |                 |                  |       |                 |                  |       |
| Total (>10 y/o) | 45–54           | Total (>10 y/o)  | 45–54 |                 |                  |       |                 |                  |       |                 |                  |       |
| 1983–1987       | 28.6            | 36.2             | 115.8 | 6.8             | 58.9             | 116.5 | 17.0            | 16.4             | 112.8 | 1.6             | 15.8             | 91.7  |
| 1988–1992       | 23.0            | 27.4             | 117.3 | 5.0             | 42.8             | 124.7 | 14.8            | 13.4             | 110.7 | 2.2             | 16.7             | 114.4 |
| 1993–1997       | 20.8            | 26.2             | 105.2 | 4.4             | 36.9             | 101.0 | 11.4            | 11.1             | 103.3 | 1.6             | 13.3             | 102.6 |
| 1998–2002       | 30.0            | 37.6             | 106.7 | 5.8             | 50.6             | 90.5  | 15.0            | 13.4             | 115.3 | 2.0             | 15.8             | 104.9 |
| 2003–2007       | 30.8            | 39.2             | 113.1 | 5.8             | 56.7             | 101.5 | 14.6            | 13.9             | 120.7 | 2.2             | 16.6             | 120.8 |
| 2008–2012       | 28.0            | 37.3             | 114.1 | 5.6             | 58.5             | 120.4 | 13.4            | 13.8             | 116.6 | 1.2             | 14.5             | 97.5  |
|                 | 15–24           |                  |       | 55–64           |                  |       | 15–24           |                  |       | 55–64           |                  |       |
| 1983–1987       | 1.0             | 13.0             | 93.2  | 5.8             | 50.6             | 119.0 | 0.6             | 6.8              | 99.2  | 4.8             | 30.0             | 152.0 |
| 1988–1992       | 1.6             | 12.4             | 124.8 | 4.8             | 40.1             | 112.9 | 0.0             | 3.7              | 70.2  | 2.6             | 19.5             | 109.2 |
| 1993–1997       | 1.0             | 11.4             | 100.6 | 3.8             | 38.1             | 94.7  | 0.6             | 5.7              | 109.2 | 2.8             | 20.2             | 127.1 |
| 1998–2002       | 2.4             | 21.0             | 132.9 | 7.0             | 68.2             | 107.3 | 0.4             | 6.5              | 92.7  | 1.6             | 17.4             | 92.3  |
| 2003–2007       | 0.8             | 15.9             | 91.3  | 7.0             | 60.8             | 105.4 | 0.4             | 8.1              | 89.7  | 3.0             | 20.2             | 120.7 |
| 2008–2012       | 1.6             | 23.7             | 111.5 | 5.6             | 48.0             | 98.8  | 0.8             | 11.1             | 114.1 | 2.0             | 15.6             | 104.8 |
|                 | 25–34           |                  |       | 65–74           |                  |       | 25–34           |                  |       | 65–74           |                  |       |
| 1983–1987       | 4.2             | 34.5             | 135.0 | 2.8             | 42.1             | 96.2  | 2.0             | 14.5             | 134.3 | 2.4             | 27.4             | 87.5  |
| 1988–1992       | 1.8             | 19.8             | 103.8 | 2.6             | 35.2             | 100.0 | 1.0             | 9.5              | 109.2 | 2.2             | 23.1             | 88.7  |
| 1993–1997       | 2.2             | 22.3             | 114.3 | 2.4             | 28.6             | 89.7  | 0.6             | 7.9              | 94.7  | 1.6             | 16.3             | 83.8  |
| 1998–2002       | 2.0             | 25.0             | 92.7  | 4.6             | 46.3             | 101.9 | 1.2             | 12.2             | 105.5 | 2.8             | 22.9             | 109.2 |
| 2003–2007       | 3.0             | 33.5             | 108.0 | 6.0             | 56.6             | 131.8 | 1.0             | 12.8             | 98.3  | 3.6             | 25.9             | 139.3 |
| 2008–2012       | 2.6             | 34.7             | 106.4 | 4.8             | 47.7             | 120.6 | 0.6             | 12.9             | 89.8  | 1.4             | 16.4             | 92.3  |
|                 | 35–44           |                  |       | >74 y/o         |                  |       | 35–44           |                  |       | >74 y/o         |                  |       |
| 1983–1987       | 5.0             | 37.8             | 118.8 | 3.0             | 68.3             | 87.2  | 1.6             | 12.5             | 105.6 | 4.0             | 56.6             | 98.1  |
| 1988–1992       | 3.8             | 27.9             | 117.9 | 3.4             | 64.2             | 99.5  | 1.4             | 10.4             | 107.9 | 5.4             | 59.8             | 125.0 |
| 1993–1997       | 3.6             | 30.1             | 123.0 | 3.4             | 58.1             | 111.5 | 0.8             | 8.2              | 96.8  | 3.4             | 34.7             | 100.9 |
| 1998–2002       | 4.8             | 45.5             | 129.3 | 3.4             | 52.2             | 99.0  | 1.4             | 12.1             | 116.9 | 5.6             | 44.8             | 144.3 |
| 2003–2007       | 4.8             | 51.1             | 127.5 | 3.4             | 43.1             | 95.6  | 1.4             | 13.9             | 109.7 | 3.0             | 22.2             | 98.9  |
| 2008–2012       | 4.2             | 42.5             | 114.1 | 3.4             | 38.1             | 91.8  | 2.2             | 17.2             | 126.8 | 5.2             | 29.5             | 153.3 |

Secondary Medical Zone ID: 221

|                 | Male            |                  |       |                 |                  |       | Female          |                  |       |                 |                  |       |
|-----------------|-----------------|------------------|-------|-----------------|------------------|-------|-----------------|------------------|-------|-----------------|------------------|-------|
|                 | Suicide         |                  |       | Suicide         |                  |       | Suicide         |                  |       | Suicide         |                  |       |
|                 | Num<br>per year | Rate<br>/100,000 | × 100 | Num<br>per year | Rate<br>/100,000 | × 100 | Num<br>per year | Rate<br>/100,000 | × 100 | Num<br>per year | Rate<br>/100,000 | × 100 |
|                 |                 |                  |       |                 |                  |       |                 |                  |       |                 |                  |       |
| Total (>10 y/o) | 45–54           | Total (>10 y/o)  | 45–54 |                 |                  |       |                 |                  |       |                 |                  |       |
| 1983–1987       | 31.2            | 27.2             | 77.6  | 11.4            | 51.9             | 102.6 | 21.0            | 14.9             | 96.2  | 3.0             | 15.2             | 88.5  |
| 1988–1992       | 24.6            | 19.7             | 72.1  | 6.0             | 26.0             | 75.7  | 18.8            | 11.7             | 88.7  | 4.0             | 15.0             | 102.7 |
| 1993–1997       | 30.4            | 20.7             | 77.7  | 7.8             | 29.7             | 81.2  | 18.6            | 10.1             | 92.0  | 3.6             | 12.2             | 94.5  |
| 1998–2002       | 47.8            | 30.2             | 79.8  | 14.0            | 52.5             | 93.9  | 22.8            | 11.9             | 90.5  | 3.8             | 13.6             | 90.2  |
| 2003–2007       | 46.6            | 29.7             | 77.0  | 7.2             | 35.4             | 63.2  | 21.4            | 11.5             | 86.9  | 2.6             | 11.6             | 84.9  |
| 2008–2012       | 40.8            | 28.6             | 75.1  | 6.0             | 33.8             | 69.6  | 19.2            | 10.8             | 80.7  | 2.6             | 12.6             | 84.4  |
|                 | 15–24           |                  |       | 55–64           |                  |       | 15–24           |                  |       | 55–64           |                  |       |
| 1983–1987       | 1.4             | 8.7              | 62.2  | 2.8             | 26.7             | 62.7  | 2.6             | 8.8              | 129.3 | 2.6             | 17.9             | 90.9  |
| 1988–1992       | 2.0             | 8.5              | 85.6  | 4.8             | 28.1             | 79.1  | 1.6             | 5.3              | 100.6 | 1.6             | 12.2             | 68.4  |
| 1993–1997       | 3.2             | 11.5             | 101.5 | 7.8             | 36.8             | 91.3  | 2.6             | 7.2              | 137.9 | 3.8             | 16.7             | 105.1 |
| 1998–2002       | 3.0             | 13.6             | 85.9  | 10.8            | 47.9             | 75.4  | 1.8             | 6.9              | 98.3  | 4.6             | 18.1             | 96.1  |
| 2003–2007       | 4.2             | 18.7             | 107.4 | 11.0            | 44.0             | 76.2  | 1.6             | 7.8              | 87.0  | 3.8             | 14.2             | 85.0  |
| 2008–2012       | 3.2             | 18.8             | 88.6  | 9.4             | 39.7             | 81.7  | 1.2             | 7.6              | 77.9  | 4.4             | 14.9             | 99.6  |
|                 | 25–34           |                  |       | 65–74           |                  |       | 25–34           |                  |       | 65–74           |                  |       |
| 1983–1987       | 4.4             | 22.0             | 85.9  | 2.6             | 38.5             | 87.9  | 1.0             | 6.7              | 62.3  | 3.8             | 34.7             | 111.1 |
| 1988–1992       | 3.0             | 15.5             | 81.0  | 2.8             | 31.8             | 90.1  | 1.4             | 7.1              | 82.2  | 2.4             | 21.1             | 81.1  |
| 1993–1997       | 3.0             | 15.0             | 76.9  | 2.8             | 24.3             | 76.2  | 1.4             | 6.7              | 80.6  | 1.6             | 13.1             | 67.3  |
| 1998–2002       | 5.0             | 22.4             | 82.8  | 5.8             | 37.7             | 82.9  | 4.0             | 13.2             | 114.2 | 3.6             | 19.9             | 94.6  |
| 2003–2007       | 6.2             | 28.0             | 90.5  | 8.4             | 43.2             | 100.8 | 1.8             | 9.5              | 73.0  | 4.0             | 18.7             | 100.5 |
| 2008–2012       | 6.4             | 33.3             | 102.2 | 6.2             | 31.6             | 80.0  | 2.6             | 13.4             | 93.3  | 3.2             | 14.8             | 83.2  |
|                 | 35–44           |                  |       | >74 y/o         |                  |       | 35–44           |                  |       | >74 y/o         |                  |       |
| 1983–1987       | 6.2             | 23.8             | 74.7  | 2.2             | 60.1             | 76.7  | 3.2             | 11.0             | 92.9  | 4.8             | 67.4             | 116.8 |
| 1988–1992       | 3.6             | 15.7             | 66.0  | 2.0             | 44.4             | 68.9  | 3.4             | 10.6             | 110.2 | 4.4             | 46.8             | 97.7  |
| 1993–1997       | 3.4             | 16.8             | 68.5  | 2.2             | 38.9             | 74.8  | 1.8             | 7.6              | 89.8  | 3.8             | 32.5             | 94.5  |
| 1998–2002       | 5.4             | 26.7             | 75.9  | 3.8             | 47.1             | 89.3  | 2.0             | 9.1              | 88.2  | 3.0             | 21.6             | 69.7  |
| 2003–2007       | 6.0             | 29.1             | 72.6  | 3.2             | 31.9             | 70.9  | 4.2             | 14.9             | 118.2 | 3.4             | 18.3             | 81.4  |
| 2008–2012       | 5.8             | 28.7             | 77.0  | 3.6             | 28.3             | 68.2  | 1.4             | 8.8              | 65.1  | 3.8             | 16.5             | 85.8  |

Secondary Medical Zone ID: 222

|           | Male            |          |       |          |          |       | Female          |          |       |          |          |       |
|-----------|-----------------|----------|-------|----------|----------|-------|-----------------|----------|-------|----------|----------|-------|
|           | Suicide         |          |       | Suicide  |          |       | Suicide         |          |       | Suicide  |          |       |
|           | Num             | Rate     | × 100 | Num      | Rate     | × 100 | Num             | Rate     | × 100 | Num      | Rate     | × 100 |
|           | per year        | /100,000 |       | per year | /100,000 |       | per year        | /100,000 |       | per year | /100,000 |       |
|           | Total (>10 y/o) |          |       | 45–54    |          |       | Total (>10 y/o) |          |       | 45–54    |          |       |
| 1983–1987 | 26.8            | 30.6     | 90.5  | 6.0      | 43.4     | 85.8  | 15.8            | 14.9     | 96.7  | 2.2      | 16.3     | 94.3  |
| 1988–1992 | 20.0            | 22.1     | 84.0  | 5.2      | 33.7     | 98.1  | 13.4            | 12.0     | 89.8  | 2.8      | 16.1     | 110.4 |
| 1993–1997 | 21.0            | 21.7     | 81.0  | 4.6      | 30.0     | 82.0  | 11.4            | 9.8      | 85.4  | 2.0      | 12.2     | 94.3  |
| 1998–2002 | 37.8            | 34.4     | 96.4  | 9.6      | 56.2     | 100.4 | 15.0            | 12.2     | 93.0  | 2.6      | 15.0     | 99.8  |
| 2003–2007 | 33.2            | 33.4     | 87.0  | 6.0      | 44.7     | 79.9  | 15.0            | 12.2     | 97.0  | 2.4      | 14.7     | 107.5 |
| 2008–2012 | 34.6            | 34.2     | 99.4  | 6.8      | 52.7     | 108.5 | 17.0            | 14.0     | 108.2 | 1.8      | 14.3     | 96.0  |
|           | 15–24           |          |       | 55–64    |          |       | 15–24           |          |       | 55–64    |          |       |
| 1983–1987 | 1.4             | 10.6     | 76.1  | 5.2      | 44.1     | 103.9 | 0.6             | 5.5      | 80.5  | 3.0      | 21.5     | 109.0 |
| 1988–1992 | 1.2             | 8.1      | 82.2  | 3.6      | 29.6     | 83.3  | 0.8             | 4.8      | 90.9  | 2.2      | 16.8     | 94.1  |
| 1993–1997 | 1.4             | 9.3      | 82.2  | 4.8      | 36.0     | 89.5  | 0.8             | 4.7      | 90.6  | 1.0      | 11.0     | 69.4  |
| 1998–2002 | 2.4             | 15.1     | 95.5  | 9.8      | 64.8     | 101.9 | 1.4             | 7.6      | 108.7 | 3.4      | 20.3     | 108.0 |
| 2003–2007 | 2.4             | 17.0     | 97.4  | 6.8      | 45.5     | 78.8  | 0.8             | 7.3      | 81.4  | 2.4      | 15.5     | 92.4  |
| 2008–2012 | 3.0             | 22.4     | 105.6 | 5.4      | 38.8     | 79.9  | 1.6             | 11.2     | 115.2 | 2.6      | 15.0     | 100.8 |
|           | 25–34           |          |       | 65–74    |          |       | 25–34           |          |       | 65–74    |          |       |
| 1983–1987 | 4.8             | 30.2     | 118.2 | 2.8      | 42.8     | 97.8  | 2.4             | 13.7     | 127.2 | 3.4      | 34.2     | 109.6 |
| 1988–1992 | 2.6             | 19.1     | 100.1 | 1.6      | 26.3     | 74.7  | 1.0             | 8.1      | 93.1  | 2.6      | 24.6     | 94.4  |
| 1993–1997 | 1.6             | 14.5     | 74.1  | 3.0      | 30.6     | 95.8  | 0.6             | 6.5      | 78.2  | 2.8      | 21.5     | 110.1 |
| 1998–2002 | 2.8             | 22.2     | 82.2  | 5.8      | 48.3     | 106.3 | 2.2             | 12.8     | 110.3 | 2.4      | 19.4     | 92.1  |
| 2003–2007 | 7.0             | 42.5     | 137.1 | 4.0      | 35.8     | 83.4  | 1.8             | 12.8     | 98.5  | 2.0      | 16.5     | 88.6  |
| 2008–2012 | 3.6             | 31.9     | 97.9  | 5.8      | 42.4     | 107.4 | 2.2             | 15.9     | 110.9 | 2.4      | 17.3     | 97.4  |
|           | 35–44           |          |       | >74 y/o  |          |       | 35–44           |          |       | >74 y/o  |          |       |
| 1983–1987 | 4.0             | 25.8     | 80.9  | 2.4      | 65.6     | 83.8  | 1.6             | 10.5     | 88.8  | 2.6      | 44.1     | 76.4  |
| 1988–1992 | 3.6             | 22.1     | 93.4  | 2.2      | 51.6     | 80.0  | 1.8             | 10.0     | 103.7 | 2.2      | 31.1     | 65.1  |
| 1993–1997 | 3.0             | 21.3     | 87.0  | 2.6      | 48.8     | 93.8  | 1.6             | 9.4      | 110.6 | 2.6      | 27.7     | 80.6  |
| 1998–2002 | 3.8             | 30.5     | 86.7  | 3.6      | 53.3     | 101.2 | 1.0             | 8.9      | 86.1  | 2.0      | 19.3     | 62.2  |
| 2003–2007 | 4.0             | 33.6     | 83.7  | 3.0      | 38.1     | 84.7  | 1.6             | 12.3     | 97.3  | 4.0      | 26.2     | 116.9 |
| 2008–2012 | 4.8             | 36.7     | 98.7  | 5.2      | 47.5     | 114.5 | 3.2             | 17.5     | 128.7 | 3.2      | 19.2     | 100.0 |

Secondary Medical Zone ID: 223

|           | Male            |                  |       |                 |                  |       | Female          |                  |       |                 |                  |       |
|-----------|-----------------|------------------|-------|-----------------|------------------|-------|-----------------|------------------|-------|-----------------|------------------|-------|
|           | Suicide         |                  |       | Suicide         |                  |       | Suicide         |                  |       | Suicide         |                  |       |
|           | Num<br>per year | Rate<br>/100,000 | × 100 | Num<br>per year | Rate<br>/100,000 | × 100 | Num<br>per year | Rate<br>/100,000 | × 100 | Num<br>per year | Rate<br>/100,000 | × 100 |
|           |                 |                  |       |                 |                  |       |                 |                  |       |                 |                  |       |
|           | Total (>10 y/o) |                  |       | 45–54           |                  |       | Total (>10 y/o) |                  |       | 45–54           |                  |       |
| 1983–1987 | 28.6            | 27.4             | 77.1  | 7.2             | 38.0             | 75.1  | 17.0            | 14.3             | 88.8  | 2.6             | 15.0             | 87.1  |
| 1988–1992 | 28.6            | 21.9             | 86.5  | 7.2             | 29.2             | 85.1  | 15.4            | 11.1             | 80.5  | 2.6             | 12.2             | 83.6  |
| 1993–1997 | 26.8            | 19.7             | 71.9  | 6.2             | 24.9             | 68.1  | 15.4            | 9.4              | 82.5  | 4.2             | 13.4             | 103.4 |
| 1998–2002 | 50.4            | 31.8             | 85.9  | 11.6            | 46.0             | 82.1  | 21.4            | 11.8             | 90.0  | 3.8             | 13.6             | 90.3  |
| 2003–2007 | 42.2            | 29.2             | 72.7  | 7.6             | 38.6             | 69.0  | 20.8            | 11.7             | 89.1  | 2.8             | 12.4             | 90.5  |
| 2008–2012 | 39.8            | 28.7             | 75.6  | 6.4             | 37.4             | 76.9  | 20.8            | 11.9             | 89.5  | 3.6             | 15.9             | 106.7 |
|           | 15–24           |                  |       | 55–64           |                  |       | 15–24           |                  |       | 55–64           |                  |       |
| 1983–1987 | 1.2             | 8.4              | 60.2  | 5.6             | 42.8             | 100.6 | 1.4             | 6.6              | 97.0  | 1.8             | 15.9             | 80.4  |
| 1988–1992 | 2.6             | 9.8              | 98.7  | 6.2             | 35.8             | 100.7 | 1.0             | 4.4              | 83.0  | 2.4             | 15.4             | 86.2  |
| 1993–1997 | 1.6             | 8.1              | 71.5  | 7.4             | 36.5             | 90.7  | 1.0             | 4.3              | 83.0  | 2.0             | 11.9             | 75.1  |
| 1998–2002 | 4.2             | 17.0             | 107.8 | 13.2            | 54.2             | 85.2  | 1.6             | 6.9              | 98.1  | 4.0             | 17.0             | 90.5  |
| 2003–2007 | 2.4             | 14.5             | 83.3  | 10.2            | 40.1             | 69.6  | 2.2             | 10.3             | 114.1 | 4.6             | 15.8             | 94.5  |
| 2008–2012 | 2.6             | 18.0             | 85.1  | 7.6             | 34.8             | 71.7  | 1.0             | 7.7              | 79.4  | 3.4             | 12.9             | 86.4  |
|           | 25–34           |                  |       | 65–74           |                  |       | 25–34           |                  |       | 65–74           |                  |       |
| 1983–1987 | 2.4             | 17.2             | 67.2  | 4.2             | 55.2             | 126.0 | 2.2             | 10.7             | 99.4  | 2.8             | 30.1             | 96.3  |
| 1988–1992 | 2.8             | 16.2             | 84.6  | 2.0             | 27.4             | 77.9  | 2.2             | 9.7              | 111.7 | 3.0             | 26.0             | 99.6  |
| 1993–1997 | 2.4             | 13.9             | 71.4  | 3.6             | 30.4             | 95.2  | 1.8             | 8.0              | 96.3  | 1.6             | 13.8             | 71.0  |
| 1998–2002 | 5.2             | 23.5             | 87.1  | 6.6             | 44.0             | 96.7  | 2.8             | 11.2             | 96.3  | 3.8             | 21.7             | 103.4 |
| 2003–2007 | 5.8             | 27.8             | 89.5  | 5.4             | 32.5             | 75.8  | 2.4             | 11.2             | 86.2  | 3.4             | 17.7             | 95.1  |
| 2008–2012 | 4.0             | 26.3             | 80.9  | 7.4             | 34.1             | 86.3  | 2.2             | 12.6             | 88.1  | 3.8             | 16.7             | 93.8  |
|           | 35–44           |                  |       | >74 y/o         |                  |       | 35–44           |                  |       | >74 y/o         |                  |       |
| 1983–1987 | 5.8             | 23.1             | 72.6  | 2.0             | 63.6             | 81.2  | 1.8             | 8.3              | 70.5  | 4.4             | 71.7             | 124.2 |
| 1988–1992 | 4.8             | 19.7             | 83.2  | 3.0             | 63.1             | 97.8  | 1.6             | 7.3              | 75.6  | 2.6             | 33.3             | 69.6  |
| 1993–1997 | 2.2             | 13.6             | 55.5  | 3.4             | 55.9             | 107.4 | 1.4             | 6.9              | 80.9  | 3.4             | 31.1             | 90.3  |
| 1998–2002 | 5.4             | 28.5             | 80.8  | 4.0             | 52.5             | 99.5  | 2.0             | 9.5              | 92.2  | 3.4             | 25.3             | 81.6  |
| 2003–2007 | 7.2             | 34.8             | 86.9  | 3.4             | 35.9             | 79.8  | 2.6             | 11.8             | 93.3  | 2.6             | 15.9             | 71.1  |
| 2008–2012 | 7.8             | 34.2             | 91.8  | 3.8             | 31.7             | 76.3  | 2.8             | 12.0             | 88.4  | 4.0             | 18.5             | 96.2  |



Secondary Medical Zone ID: 224

|                 | Male            |                  |       |                 |                  |       | Female          |                  |       |                 |                  |       |
|-----------------|-----------------|------------------|-------|-----------------|------------------|-------|-----------------|------------------|-------|-----------------|------------------|-------|
|                 | Suicide         |                  |       | Suicide         |                  |       | Suicide         |                  |       | Suicide         |                  |       |
|                 | Num<br>per year | Rate<br>/100,000 | × 100 | Num<br>per year | Rate<br>/100,000 | × 100 | Num<br>per year | Rate<br>/100,000 | × 100 | Num<br>per year | Rate<br>/100,000 | × 100 |
|                 |                 |                  |       |                 |                  |       |                 |                  |       |                 |                  |       |
| Total (>10 y/o) | 45–54           | Total (>10 y/o)  | 45–54 |                 |                  |       |                 |                  |       |                 |                  |       |
| 1983–1987       | 31.2            | 27.5             | 77.8  | 8.4             | 40.6             | 80.3  | 18.8            | 13.9             | 87.8  | 2.8             | 15.0             | 87.3  |
| 1988–1992       | 25.8            | 20.4             | 75.8  | 6.4             | 27.0             | 78.6  | 20.2            | 12.3             | 94.1  | 4.4             | 16.2             | 110.5 |
| 1993–1997       | 26.6            | 19.4             | 69.5  | 7.4             | 28.5             | 77.9  | 20.4            | 10.8             | 99.3  | 3.6             | 12.3             | 95.4  |
| 1998–2002       | 50.0            | 31.3             | 82.3  | 12.2            | 46.3             | 82.7  | 20.0            | 11.0             | 82.2  | 3.8             | 13.7             | 91.0  |
| 2003–2007       | 49.6            | 31.1             | 79.7  | 12.0            | 51.4             | 92.0  | 22.6            | 11.8             | 91.2  | 3.2             | 13.0             | 95.1  |
| 2008–2012       | 50.8            | 31.6             | 87.6  | 10.2            | 46.9             | 96.5  | 18.6            | 10.8             | 78.5  | 1.8             | 10.4             | 69.7  |
|                 | 15–24           |                  |       | 55–64           |                  |       | 15–24           |                  |       | 55–64           |                  |       |
| 1983–1987       | 1.2             | 8.0              | 57.1  | 5.6             | 40.6             | 95.6  | 1.6             | 6.8              | 98.8  | 2.4             | 17.0             | 86.2  |
| 1988–1992       | 1.8             | 8.2              | 82.8  | 3.6             | 23.7             | 66.7  | 1.4             | 5.1              | 97.2  | 3.0             | 16.8             | 93.8  |
| 1993–1997       | 2.0             | 9.2              | 81.4  | 5.4             | 29.0             | 72.0  | 1.4             | 5.1              | 97.5  | 2.8             | 14.1             | 88.5  |
| 1998–2002       | 3.2             | 14.6             | 92.5  | 13.6            | 56.3             | 88.7  | 1.0             | 5.5              | 78.1  | 4.8             | 18.8             | 99.8  |
| 2003–2007       | 3.4             | 16.9             | 96.8  | 11.4            | 44.3             | 76.7  | 1.8             | 8.6              | 95.9  | 4.2             | 15.2             | 90.6  |
| 2008–2012       | 3.6             | 19.9             | 93.6  | 8.0             | 34.9             | 71.8  | 1.0             | 7.0              | 71.7  | 2.4             | 11.0             | 73.7  |
|                 | 25–34           |                  |       | 65–74           |                  |       | 25–34           |                  |       | 65–74           |                  |       |
| 1983–1987       | 4.6             | 23.5             | 92.1  | 2.6             | 37.0             | 84.4  | 2.0             | 9.8              | 90.8  | 4.0             | 33.3             | 106.4 |
| 1988–1992       | 3.8             | 18.7             | 98.0  | 3.4             | 35.4             | 100.6 | 1.4             | 7.3              | 84.4  | 4.2             | 29.7             | 114.0 |
| 1993–1997       | 3.6             | 16.6             | 84.8  | 2.8             | 25.0             | 78.3  | 3.0             | 10.2             | 122.1 | 1.8             | 13.9             | 71.5  |
| 1998–2002       | 6.2             | 24.9             | 92.1  | 4.8             | 34.4             | 75.5  | 3.0             | 11.1             | 95.6  | 2.4             | 15.9             | 75.6  |
| 2003–2007       | 5.6             | 25.1             | 80.8  | 7.0             | 38.1             | 88.8  | 3.0             | 12.1             | 92.7  | 4.6             | 21.0             | 112.6 |
| 2008–2012       | 5.8             | 30.0             | 92.1  | 8.2             | 37.4             | 94.7  | 2.6             | 12.9             | 90.0  | 3.4             | 15.4             | 86.8  |
|                 | 35–44           |                  |       | >74 y/o         |                  |       | 35–44           |                  |       | >74 y/o         |                  |       |
| 1983–1987       | 5.8             | 23.0             | 72.3  | 3.0             | 72.1             | 92.0  | 2.6             | 10.0             | 84.3  | 3.2             | 47.0             | 81.5  |
| 1988–1992       | 4.0             | 16.9             | 71.4  | 2.8             | 54.3             | 84.2  | 2.4             | 8.9              | 92.2  | 3.2             | 34.0             | 71.2  |
| 1993–1997       | 2.8             | 14.7             | 59.8  | 2.4             | 40.9             | 78.5  | 2.6             | 9.5              | 112.1 | 5.0             | 38.8             | 112.7 |
| 1998–2002       | 7.6             | 33.3             | 94.4  | 2.2             | 34.1             | 64.7  | 1.2             | 7.1              | 68.5  | 3.6             | 24.6             | 79.3  |
| 2003–2007       | 7.2             | 31.3             | 78.0  | 3.0             | 31.9             | 70.9  | 2.4             | 10.5             | 83.4  | 3.4             | 18.6             | 82.8  |
| 2008–2012       | 9.4             | 36.0             | 96.8  | 5.4             | 38.8             | 93.6  | 3.4             | 12.6             | 93.1  | 4.0             | 17.8             | 92.6  |

Secondary Medical Zone ID: 225

|                 | Male            |                  |       |                 |                  |       | Female          |                  |       |                 |                  |       |
|-----------------|-----------------|------------------|-------|-----------------|------------------|-------|-----------------|------------------|-------|-----------------|------------------|-------|
|                 | Suicide         |                  |       | Suicide         |                  |       | Suicide         |                  |       | Suicide         |                  |       |
|                 | Num<br>per year | Rate<br>/100,000 | × 100 | Num<br>per year | Rate<br>/100,000 | × 100 | Num<br>per year | Rate<br>/100,000 | × 100 | Num<br>per year | Rate<br>/100,000 | × 100 |
|                 |                 |                  |       |                 |                  |       |                 |                  |       |                 |                  |       |
| Total (>10 y/o) | 45–54           | Total (>10 y/o)  | 45–54 |                 |                  |       |                 |                  |       |                 |                  |       |
| 1983–1987       | 20.4            | 37.7             | 129.3 | 5.4             | 64.6             | 127.8 | 9.2             | 15.4             | 103.8 | 0.8             | 15.0             | 87.3  |
| 1988–1992       | 14.2            | 26.5             | 117.3 | 1.8             | 31.4             | 91.4  | 10.8            | 14.3             | 125.4 | 1.0             | 14.6             | 100.1 |
| 1993–1997       | 14.0            | 26.9             | 112.9 | 2.8             | 38.6             | 105.4 | 7.6             | 11.3             | 108.5 | 1.6             | 15.6             | 121.2 |
| 1998–2002       | 18.8            | 37.3             | 109.2 | 3.0             | 48.7             | 86.9  | 7.4             | 12.3             | 99.4  | 0.4             | 12.7             | 84.1  |
| 2003–2007       | 18.8            | 39.6             | 115.0 | 4.2             | 63.2             | 113.1 | 8.8             | 13.5             | 117.1 | 1.4             | 15.9             | 116.4 |
| 2008–2012       | 15.2            | 35.6             | 107.3 | 2.8             | 51.7             | 106.3 | 6.4             | 13.3             | 102.5 | 1.2             | 16.8             | 112.3 |
|                 | 15–24           |                  |       | 55–64           |                  |       | 15–24           |                  |       | 55–64           |                  |       |
| 1983–1987       | 1.0             | 15.0             | 107.8 | 2.8             | 41.6             | 97.9  | 0.0             | 5.3              | 77.3  | 2.4             | 24.5             | 123.9 |
| 1988–1992       | 0.6             | 10.0             | 100.6 | 4.2             | 47.0             | 132.3 | 0.2             | 4.9              | 92.5  | 1.4             | 17.9             | 100.1 |
| 1993–1997       | 0.4             | 10.3             | 91.1  | 3.6             | 46.2             | 114.9 | 0.2             | 4.8              | 92.8  | 1.4             | 17.1             | 107.3 |
| 1998–2002       | 0.4             | 13.7             | 86.5  | 4.8             | 71.2             | 112.1 | 0.4             | 7.2              | 101.9 | 0.2             | 14.3             | 75.8  |
| 2003–2007       | 1.2             | 19.4             | 111.1 | 3.2             | 53.7             | 93.0  | 0.4             | 9.0              | 100.1 | 1.4             | 17.8             | 106.3 |
| 2008–2012       | 1.0             | 22.3             | 105.3 | 4.0             | 52.9             | 108.9 | 0.4             | 10.0             | 102.9 | 1.0             | 14.9             | 100.2 |
|                 | 25–34           |                  |       | 65–74           |                  |       | 25–34           |                  |       | 65–74           |                  |       |
| 1983–1987       | 1.8             | 26.8             | 104.7 | 3.2             | 61.5             | 140.5 | 0.4             | 9.5              | 88.5  | 2.8             | 40.3             | 129.0 |
| 1988–1992       | 2.2             | 27.6             | 144.5 | 2.4             | 43.0             | 122.1 | 0.6             | 9.1              | 105.0 | 3.2             | 39.3             | 150.7 |
| 1993–1997       | 2.4             | 28.9             | 147.8 | 1.6             | 29.7             | 93.0  | 0.6             | 8.9              | 107.4 | 1.6             | 21.1             | 108.0 |
| 1998–2002       | 2.2             | 32.6             | 120.7 | 3.6             | 51.0             | 112.2 | 0.8             | 12.5             | 108.1 | 2.8             | 28.5             | 135.9 |
| 2003–2007       | 1.4             | 31.7             | 102.3 | 2.6             | 43.6             | 101.5 | 0.4             | 12.3             | 94.4  | 1.4             | 19.3             | 103.5 |
| 2008–2012       | 0.8             | 30.2             | 92.7  | 2.6             | 43.6             | 110.5 | 0.6             | 14.9             | 103.8 | 0.8             | 16.4             | 92.0  |
|                 | 35–44           |                  |       | >74 y/o         |                  |       | 35–44           |                  |       | >74 y/o         |                  |       |
| 1983–1987       | 3.0             | 37.8             | 118.9 | 3.2             | 108.3            | 138.3 | 1.2             | 13.4             | 113.1 | 1.6             | 46.5             | 80.7  |
| 1988–1992       | 1.6             | 23.2             | 98.0  | 1.4             | 56.7             | 87.9  | 1.2             | 11.6             | 119.7 | 3.2             | 61.2             | 127.8 |
| 1993–1997       | 2.0             | 27.5             | 112.3 | 1.2             | 44.3             | 85.1  | 0.8             | 9.6              | 112.8 | 1.4             | 27.5             | 80.0  |
| 1998–2002       | 3.0             | 44.2             | 125.5 | 1.8             | 49.6             | 94.1  | 0.4             | 9.5              | 91.7  | 2.4             | 34.1             | 109.8 |
| 2003–2007       | 3.2             | 53.7             | 134.0 | 3.0             | 54.3             | 120.6 | 1.0             | 14.2             | 112.5 | 2.8             | 30.6             | 136.4 |
| 2008–2012       | 1.8             | 38.7             | 104.1 | 2.2             | 40.4             | 97.3  | 0.8             | 14.5             | 106.7 | 1.6             | 18.4             | 95.9  |

Secondary Medical Zone ID: 226

|           | Male            |          |       |          |          |       | Female          |          |       |          |          |       |
|-----------|-----------------|----------|-------|----------|----------|-------|-----------------|----------|-------|----------|----------|-------|
|           | Suicide         |          |       | Suicide  |          |       | Suicide         |          |       | Suicide  |          |       |
|           | Num             | Rate     | × 100 | Num      | Rate     | × 100 | Num             | Rate     | × 100 | Num      | Rate     | × 100 |
|           | per year        | /100,000 |       | per year | /100,000 |       | per year        | /100,000 |       | per year | /100,000 |       |
|           | Total (>10 y/o) |          |       | 45–54    |          |       | Total (>10 y/o) |          |       | 45–54    |          |       |
| 1983–1987 | 80.2            | 38.8     | 125.6 | 29.4     | 85.4     | 168.8 | 41.2            | 17.0     | 114.5 | 9.4      | 24.7     | 143.4 |
| 1988–1992 | 52.6            | 25.2     | 104.7 | 12.8     | 37.0     | 107.6 | 33.0            | 12.5     | 100.6 | 6.4      | 16.7     | 114.5 |
| 1993–1997 | 57.4            | 26.2     | 107.1 | 13.6     | 37.2     | 101.7 | 30.2            | 11.0     | 103.5 | 6.8      | 16.1     | 124.7 |
| 1998–2002 | 84.4            | 37.7     | 108.4 | 20.8     | 61.5     | 109.9 | 34.6            | 12.7     | 101.6 | 6.4      | 17.0     | 112.6 |
| 2003–2007 | 71.2            | 33.9     | 94.6  | 12.0     | 45.3     | 80.9  | 33.0            | 13.0     | 103.1 | 6.2      | 18.2     | 132.6 |
| 2008–2012 | 67.8            | 33.4     | 99.5  | 9.6      | 40.8     | 84.0  | 28.0            | 12.3     | 92.6  | 2.6      | 11.5     | 77.4  |
|           | 15–24           |          |       | 55–64    |          |       | 15–24           |          |       | 55–64    |          |       |
| 1983–1987 | 3.2             | 11.2     | 80.4  | 13.8     | 54.1     | 127.4 | 0.6             | 3.8      | 55.3  | 4.2      | 16.4     | 83.0  |
| 1988–1992 | 2.2             | 8.1      | 81.8  | 11.6     | 39.7     | 111.7 | 1.2             | 4.2      | 80.0  | 4.4      | 15.3     | 85.4  |
| 1993–1997 | 3.6             | 11.7     | 103.3 | 14.2     | 46.2     | 114.8 | 2.2             | 6.3      | 121.4 | 6.4      | 18.7     | 117.4 |
| 1998–2002 | 4.2             | 16.3     | 103.1 | 23.8     | 73.8     | 116.2 | 1.2             | 5.8      | 82.2  | 5.6      | 17.2     | 91.4  |
| 2003–2007 | 3.2             | 15.9     | 90.9  | 23.0     | 67.4     | 116.7 | 2.0             | 9.1      | 101.3 | 6.6      | 17.6     | 105.0 |
| 2008–2012 | 3.2             | 18.3     | 86.5  | 18.2     | 56.3     | 115.8 | 2.2             | 10.8     | 111.7 | 4.2      | 13.2     | 88.7  |
|           | 25–34           |          |       | 65–74    |          |       | 25–34           |          |       | 65–74    |          |       |
| 1983–1987 | 7.0             | 24.0     | 94.0  | 6.6      | 47.9     | 109.5 | 3.6             | 11.3     | 104.7 | 6.6      | 33.0     | 105.8 |
| 1988–1992 | 4.0             | 15.5     | 81.2  | 6.0      | 37.6     | 106.8 | 1.4             | 6.2      | 71.4  | 10.0     | 41.4     | 158.6 |
| 1993–1997 | 6.0             | 20.9     | 107.0 | 5.4      | 27.7     | 86.9  | 1.8             | 6.8      | 81.9  | 4.8      | 18.9     | 96.7  |
| 1998–2002 | 8.6             | 28.9     | 107.2 | 11.8     | 48.5     | 106.6 | 3.8             | 11.9     | 103.1 | 7.0      | 23.5     | 112.0 |
| 2003–2007 | 6.6             | 26.6     | 85.7  | 11.8     | 45.9     | 106.9 | 3.4             | 12.5     | 96.1  | 4.8      | 16.7     | 89.6  |
| 2008–2012 | 6.4             | 30.3     | 93.1  | 12.0     | 43.3     | 109.7 | 2.6             | 12.6     | 88.3  | 5.2      | 16.9     | 95.2  |
|           | 35–44           |          |       | >74 y/o  |          |       | 35–44           |          |       | >74 y/o  |          |       |
| 1983–1987 | 15.8            | 39.1     | 123.0 | 4.4      | 61.4     | 78.3  | 7.2             | 15.8     | 133.8 | 9.6      | 72.8     | 126.2 |
| 1988–1992 | 10.2            | 28.2     | 118.9 | 5.6      | 61.5     | 95.4  | 2.2             | 7.3      | 75.9  | 7.4      | 43.9     | 91.8  |
| 1993–1997 | 6.8             | 23.6     | 96.1  | 7.8      | 70.7     | 135.7 | 1.4             | 6.0      | 70.2  | 6.8      | 33.5     | 97.5  |
| 1998–2002 | 8.6             | 32.9     | 93.5  | 6.2      | 49.3     | 93.6  | 3.0             | 10.4     | 100.7 | 7.6      | 30.8     | 99.3  |
| 2003–2007 | 7.8             | 31.4     | 78.4  | 6.6      | 40.1     | 89.1  | 3.2             | 11.6     | 92.1  | 6.8      | 22.6     | 100.9 |
| 2008–2012 | 10.0            | 36.0     | 96.9  | 8.2      | 40.4     | 97.5  | 4.8             | 15.0     | 110.4 | 6.4      | 18.3     | 95.3  |

Secondary Medical Zone ID: 227

|           | Male            |                  |       |                 |                  |       | Female          |                  |       |                 |                  |       |
|-----------|-----------------|------------------|-------|-----------------|------------------|-------|-----------------|------------------|-------|-----------------|------------------|-------|
|           | Suicide         |                  |       | Suicide         |                  |       | Suicide         |                  |       | Suicide         |                  |       |
|           | Num<br>per year | Rate<br>/100,000 | × 100 | Num<br>per year | Rate<br>/100,000 | × 100 | Num<br>per year | Rate<br>/100,000 | × 100 | Num<br>per year | Rate<br>/100,000 | × 100 |
|           |                 |                  |       |                 |                  |       |                 |                  |       |                 |                  |       |
|           | Total (>10 y/o) |                  |       | 45–54           |                  |       | Total (>10 y/o) |                  |       | 45–54           |                  |       |
| 1983–1987 | 12.6            | 32.9             | 102.0 | 3.4             | 54.7             | 108.1 | 7.4             | 15.3             | 103.9 | 1.0             | 17.2             | 99.6  |
| 1988–1992 | 11.6            | 25.4             | 108.9 | 1.2             | 26.5             | 77.1  | 7.0             | 12.8             | 102.9 | 1.6             | 17.1             | 116.8 |
| 1993–1997 | 13.4            | 26.1             | 108.6 | 2.8             | 35.7             | 97.5  | 8.0             | 11.6             | 116.1 | 1.4             | 14.2             | 110.2 |
| 1998–2002 | 18.4            | 35.3             | 98.0  | 3.8             | 49.1             | 87.8  | 6.4             | 11.6             | 88.2  | 0.4             | 11.8             | 78.6  |
| 2003–2007 | 19.8            | 37.0             | 101.1 | 5.2             | 62.9             | 112.4 | 7.8             | 12.1             | 99.4  | 0.6             | 11.8             | 86.0  |
| 2008–2012 | 17.8            | 33.9             | 98.6  | 3.2             | 46.4             | 95.5  | 9.8             | 13.4             | 112.1 | 0.8             | 13.3             | 89.2  |
|           | 15–24           |                  |       | 55–64           |                  |       | 15–24           |                  |       | 55–64           |                  |       |
| 1983–1987 | 0.4             | 11.9             | 85.0  | 2.6             | 47.4             | 111.5 | 0.8             | 8.4              | 123.5 | 1.4             | 21.6             | 109.5 |
| 1988–1992 | 1.0             | 11.4             | 115.6 | 2.6             | 40.7             | 114.5 | 0.0             | 4.1              | 77.0  | 0.6             | 15.4             | 86.3  |
| 1993–1997 | 1.0             | 12.2             | 107.6 | 3.0             | 44.6             | 110.9 | 0.0             | 3.9              | 75.4  | 1.8             | 20.1             | 126.5 |
| 1998–2002 | 1.0             | 15.3             | 97.1  | 5.4             | 72.7             | 114.4 | 0.0             | 5.4              | 76.3  | 1.0             | 17.4             | 92.4  |
| 2003–2007 | 1.0             | 16.8             | 96.5  | 3.8             | 51.7             | 89.5  | 0.6             | 9.2              | 102.1 | 2.2             | 19.6             | 116.9 |
| 2008–2012 | 1.2             | 20.8             | 98.0  | 4.4             | 50.2             | 103.3 | 0.4             | 8.9              | 91.5  | 2.6             | 19.2             | 128.5 |
|           | 25–34           |                  |       | 65–74           |                  |       | 25–34           |                  |       | 65–74           |                  |       |
| 1983–1987 | 1.0             | 22.4             | 87.5  | 1.2             | 43.0             | 98.1  | 1.2             | 13.2             | 122.6 | 1.4             | 32.2             | 103.2 |
| 1988–1992 | 1.0             | 18.7             | 97.6  | 1.8             | 42.1             | 119.5 | 0.4             | 8.0              | 92.7  | 1.6             | 29.9             | 114.6 |
| 1993–1997 | 1.4             | 20.2             | 103.3 | 2.2             | 40.1             | 125.8 | 0.4             | 7.5              | 89.8  | 1.4             | 22.1             | 113.6 |
| 1998–2002 | 2.0             | 27.0             | 99.9  | 2.2             | 44.2             | 97.1  | 0.2             | 8.9              | 76.4  | 1.2             | 20.5             | 97.7  |
| 2003–2007 | 2.0             | 29.7             | 95.9  | 2.6             | 44.9             | 104.6 | 0.6             | 11.3             | 87.2  | 1.2             | 18.7             | 100.5 |
| 2008–2012 | 2.4             | 35.1             | 107.8 | 2.0             | 36.5             | 92.4  | 1.2             | 15.6             | 108.9 | 1.6             | 19.5             | 109.6 |
|           | 35–44           |                  |       | >74 y/o         |                  |       | 35–44           |                  |       | >74 y/o         |                  |       |
| 1983–1987 | 2.6             | 33.0             | 103.8 | 1.4             | 78.4             | 100.1 | 1.0             | 12.2             | 103.3 | 0.6             | 35.2             | 61.0  |
| 1988–1992 | 2.6             | 27.9             | 117.9 | 1.4             | 65.3             | 101.3 | 0.8             | 9.8              | 101.0 | 2.0             | 52.0             | 108.7 |
| 1993–1997 | 2.2             | 26.4             | 107.8 | 0.8             | 42.8             | 82.2  | 0.6             | 8.2              | 96.6  | 2.4             | 46.9             | 136.3 |
| 1998–2002 | 2.6             | 34.3             | 97.4  | 1.4             | 49.6             | 94.1  | 1.2             | 11.7             | 113.5 | 2.4             | 38.9             | 125.3 |
| 2003–2007 | 3.6             | 44.2             | 110.4 | 1.6             | 43.0             | 95.6  | 0.4             | 10.1             | 80.0  | 2.2             | 28.7             | 127.8 |
| 2008–2012 | 1.8             | 31.5             | 84.6  | 2.8             | 50.9             | 122.7 | 1.0             | 12.9             | 95.4  | 2.2             | 23.8             | 123.6 |

Secondary Medical Zone ID: 228

|           | Male            |                  |       |                 |                  |       | Female          |                  |       |                 |                  |       |
|-----------|-----------------|------------------|-------|-----------------|------------------|-------|-----------------|------------------|-------|-----------------|------------------|-------|
|           | Suicide         |                  |       | Suicide         |                  |       | Suicide         |                  |       | Suicide         |                  |       |
|           | Num<br>per year | Rate<br>/100,000 | × 100 | Num<br>per year | Rate<br>/100,000 | × 100 | Num<br>per year | Rate<br>/100,000 | × 100 | Num<br>per year | Rate<br>/100,000 | × 100 |
|           |                 |                  |       |                 |                  |       |                 |                  |       |                 |                  |       |
|           | Total (>10 y/o) |                  |       | 45–54           |                  |       | Total (>10 y/o) |                  |       | 45–54           |                  |       |
| 1983–1987 | 13.8            | 33.7             | 105.5 | 4.6             | 63.3             | 125.2 | 9.0             | 16.2             | 113.1 | 0.8             | 15.7             | 91.2  |
| 1988–1992 | 11.6            | 25.2             | 107.3 | 2.2             | 33.8             | 98.5  | 9.0             | 13.8             | 118.7 | 0.8             | 13.9             | 95.3  |
| 1993–1997 | 14.4            | 26.5             | 117.3 | 1.8             | 30.7             | 83.9  | 8.2             | 11.6             | 118.5 | 1.2             | 13.7             | 106.0 |
| 1998–2002 | 17.0            | 36.0             | 99.3  | 4.0             | 53.4             | 95.4  | 8.2             | 12.7             | 106.0 | 1.0             | 14.4             | 95.4  |
| 2003–2007 | 11.8            | 31.2             | 76.0  | 2.8             | 47.2             | 84.4  | 7.0             | 12.2             | 100.2 | 1.0             | 13.8             | 100.8 |
| 2008–2012 | 14.2            | 32.7             | 96.2  | 1.6             | 39.7             | 81.8  | 8.6             | 13.5             | 113.2 | 1.2             | 16.0             | 107.1 |
|           | 15–24           |                  |       | 55–64           |                  |       | 15–24           |                  |       | 55–64           |                  |       |
| 1983–1987 | 0.6             | 12.4             | 88.6  | 2.4             | 43.9             | 103.3 | 0.4             | 6.8              | 99.6  | 2.4             | 26.5             | 134.1 |
| 1988–1992 | 1.2             | 11.6             | 117.6 | 2.6             | 39.3             | 110.6 | 0.6             | 6.2              | 117.4 | 1.8             | 20.9             | 117.0 |
| 1993–1997 | 1.0             | 11.8             | 104.6 | 3.6             | 48.6             | 120.8 | 0.2             | 4.7              | 89.6  | 1.0             | 15.5             | 97.8  |
| 1998–2002 | 1.0             | 15.5             | 98.3  | 4.0             | 62.3             | 98.1  | 0.4             | 6.9              | 98.1  | 1.2             | 18.4             | 97.8  |
| 2003–2007 | 0.2             | 13.6             | 77.7  | 3.6             | 53.0             | 91.9  | 0.4             | 8.5              | 94.6  | 1.0             | 15.7             | 93.9  |
| 2008–2012 | 1.0             | 21.0             | 99.0  | 2.2             | 40.3             | 82.9  | 0.4             | 9.4              | 96.9  | 1.0             | 14.4             | 96.5  |
|           | 25–34           |                  |       | 65–74           |                  |       | 25–34           |                  |       | 65–74           |                  |       |
| 1983–1987 | 2.0             | 30.0             | 117.5 | 0.6             | 32.9             | 75.2  | 0.6             | 10.7             | 99.5  | 1.0             | 27.0             | 86.3  |
| 1988–1992 | 0.4             | 14.8             | 77.3  | 1.8             | 40.9             | 116.1 | 0.8             | 9.9              | 114.4 | 1.8             | 30.5             | 116.7 |
| 1993–1997 | 0.8             | 18.1             | 92.7  | 3.4             | 51.5             | 161.5 | 0.2             | 7.2              | 86.5  | 2.0             | 26.0             | 133.3 |
| 1998–2002 | 1.6             | 27.8             | 103.1 | 1.8             | 40.3             | 88.5  | 0.8             | 12.1             | 104.4 | 1.6             | 22.6             | 107.5 |
| 2003–2007 | 0.4             | 22.8             | 73.4  | 2.6             | 45.1             | 105.2 | 0.4             | 11.7             | 89.8  | 1.0             | 17.6             | 94.3  |
| 2008–2012 | 2.0             | 36.2             | 111.3 | 3.0             | 44.7             | 113.1 | 1.0             | 15.9             | 110.9 | 2.0             | 21.7             | 121.8 |
|           | 35–44           |                  |       | >74 y/o         |                  |       | 35–44           |                  |       | >74 y/o         |                  |       |
| 1983–1987 | 2.0             | 30.1             | 94.7  | 1.6             | 81.1             | 103.6 | 0.8             | 11.6             | 98.3  | 2.8             | 79.2             | 137.2 |
| 1988–1992 | 1.2             | 20.4             | 86.2  | 2.2             | 81.1             | 125.7 | 0.2             | 7.9              | 81.9  | 3.0             | 66.5             | 139.1 |
| 1993–1997 | 1.4             | 22.6             | 92.1  | 2.2             | 69.1             | 132.6 | 0.6             | 8.5              | 99.7  | 3.0             | 53.3             | 154.9 |
| 1998–2002 | 3.0             | 42.4             | 120.3 | 1.6             | 52.0             | 98.6  | 0.4             | 9.1              | 88.1  | 2.8             | 42.3             | 136.4 |
| 2003–2007 | 0.8             | 27.4             | 68.5  | 1.4             | 39.9             | 88.6  | 0.6             | 12.0             | 95.2  | 2.6             | 31.7             | 141.1 |
| 2008–2012 | 1.0             | 31.6             | 85.0  | 3.4             | 56.2             | 135.4 | 0.8             | 13.7             | 101.3 | 2.2             | 23.5             | 122.5 |

Secondary Medical Zone ID: 229

|                 | Male            |                  |       |                 |                  |       | Female          |                  |       |                 |                  |       |
|-----------------|-----------------|------------------|-------|-----------------|------------------|-------|-----------------|------------------|-------|-----------------|------------------|-------|
|                 | Suicide         |                  |       | Suicide         |                  |       | Suicide         |                  |       | Suicide         |                  |       |
|                 | Num<br>per year | Rate<br>/100,000 | × 100 | Num<br>per year | Rate<br>/100,000 | × 100 | Num<br>per year | Rate<br>/100,000 | × 100 | Num<br>per year | Rate<br>/100,000 | × 100 |
|                 |                 |                  |       |                 |                  |       |                 |                  |       |                 |                  |       |
| Total (>10 y/o) | 45–54           | Total (>10 y/o)  | 45–54 |                 |                  |       |                 |                  |       |                 |                  |       |
| 1983–1987       | 16.4            | 36.4             | 123.5 | 5.0             | 68.2             | 134.8 | 8.0             | 15.7             | 105.6 | 1.6             | 19.7             | 114.4 |
| 1988–1992       | 12.0            | 26.6             | 116.3 | 2.8             | 41.1             | 119.7 | 10.0            | 14.7             | 131.6 | 2.0             | 19.0             | 130.1 |
| 1993–1997       | 11.6            | 26.1             | 109.9 | 1.0             | 28.4             | 77.6  | 8.0             | 12.0             | 123.0 | 1.2             | 14.4             | 111.5 |
| 1998–2002       | 16.2            | 37.1             | 108.3 | 3.0             | 52.0             | 92.9  | 6.6             | 12.5             | 100.1 | 0.6             | 13.7             | 90.9  |
| 2003–2007       | 14.4            | 35.6             | 101.5 | 2.8             | 54.0             | 96.5  | 6.4             | 12.9             | 103.1 | 0.8             | 13.8             | 100.7 |
| 2008–2012       | 14.0            | 35.2             | 107.7 | 2.0             | 46.6             | 95.9  | 6.0             | 13.0             | 102.6 | 1.2             | 17.0             | 113.7 |
|                 | 15–24           |                  |       | 55–64           |                  |       | 15–24           |                  |       | 55–64           |                  |       |
| 1983–1987       | 2.0             | 22.2             | 159.4 | 3.2             | 50.8             | 119.5 | 0.2             | 6.1              | 89.5  | 1.2             | 19.6             | 99.3  |
| 1988–1992       | 1.0             | 11.8             | 118.8 | 2.2             | 36.3             | 102.1 | 0.0             | 4.2              | 79.2  | 1.2             | 18.2             | 101.8 |
| 1993–1997       | 0.6             | 11.4             | 100.8 | 3.0             | 46.0             | 114.2 | 0.6             | 6.4              | 123.2 | 2.0             | 21.5             | 135.2 |
| 1998–2002       | 0.2             | 13.1             | 83.2  | 5.2             | 80.2             | 126.2 | 0.2             | 6.5              | 93.1  | 1.4             | 20.1             | 106.9 |
| 2003–2007       | 0.0             | 13.8             | 79.2  | 3.4             | 57.9             | 100.3 | 0.0             | 7.1              | 78.7  | 1.0             | 16.6             | 99.1  |
| 2008–2012       | 0.8             | 21.8             | 102.7 | 4.2             | 56.9             | 117.0 | 0.2             | 9.0              | 92.8  | 1.0             | 15.2             | 101.8 |
|                 | 25–34           |                  |       | 65–74           |                  |       | 25–34           |                  |       | 65–74           |                  |       |
| 1983–1987       | 0.6             | 19.8             | 77.6  | 1.6             | 45.9             | 104.9 | 0.2             | 8.7              | 80.9  | 2.0             | 37.4             | 119.8 |
| 1988–1992       | 0.8             | 18.0             | 94.4  | 1.2             | 33.9             | 96.3  | 0.6             | 9.2              | 106.6 | 1.8             | 30.5             | 116.9 |
| 1993–1997       | 1.0             | 20.0             | 102.6 | 2.2             | 39.8             | 124.7 | 0.4             | 8.2              | 98.6  | 0.8             | 17.0             | 87.2  |
| 1998–2002       | 0.8             | 23.9             | 88.7  | 2.0             | 43.1             | 94.7  | 0.6             | 11.6             | 100.3 | 1.4             | 22.0             | 104.9 |
| 2003–2007       | 1.0             | 28.1             | 90.6  | 3.0             | 51.4             | 119.8 | 0.6             | 13.0             | 99.8  | 1.8             | 22.8             | 122.5 |
| 2008–2012       | 1.0             | 31.2             | 95.8  | 1.8             | 39.4             | 99.6  | 0.6             | 14.6             | 101.8 | 0.6             | 16.0             | 90.1  |
|                 | 35–44           |                  |       | >74 y/o         |                  |       | 35–44           |                  |       | >74 y/o         |                  |       |
| 1983–1987       | 3.2             | 40.1             | 125.9 | 0.8             | 58.5             | 74.7  | 1.2             | 13.5             | 114.3 | 1.6             | 52.9             | 91.7  |
| 1988–1992       | 1.8             | 25.6             | 108.0 | 2.2             | 81.6             | 126.5 | 1.0             | 11.0             | 113.8 | 3.4             | 73.0             | 152.6 |
| 1993–1997       | 2.0             | 29.4             | 119.9 | 1.8             | 61.5             | 118.1 | 0.4             | 8.1              | 95.2  | 2.6             | 47.5             | 138.1 |
| 1998–2002       | 2.6             | 42.8             | 121.4 | 2.4             | 65.4             | 124.1 | 0.4             | 9.7              | 93.4  | 2.0             | 33.2             | 107.0 |
| 2003–2007       | 1.6             | 37.6             | 93.8  | 2.6             | 56.1             | 124.5 | 1.4             | 15.9             | 125.8 | 0.8             | 15.7             | 70.1  |
| 2008–2012       | 2.2             | 40.1             | 107.8 | 2.0             | 43.0             | 103.7 | 0.6             | 13.3             | 98.4  | 1.8             | 21.6             | 112.1 |

Secondary Medical Zone ID: 230

|           | Male            |                  |       |                 |                  |       | Female          |                  |       |                 |                  |       |
|-----------|-----------------|------------------|-------|-----------------|------------------|-------|-----------------|------------------|-------|-----------------|------------------|-------|
|           | Suicide         |                  |       | Suicide         |                  |       | Suicide         |                  |       | Suicide         |                  |       |
|           | Num<br>per year | Rate<br>/100,000 | × 100 | Num<br>per year | Rate<br>/100,000 | × 100 | Num<br>per year | Rate<br>/100,000 | × 100 | Num<br>per year | Rate<br>/100,000 | × 100 |
|           |                 |                  |       |                 |                  |       |                 |                  |       |                 |                  |       |
|           | Total (>10 y/o) |                  |       | 45–54           |                  |       | Total (>10 y/o) |                  |       | 45–54           |                  |       |
| 1983–1987 | 16.2            | 38.3             | 137.4 | 5.2             | 76.0             | 150.4 | 8.4             | 16.4             | 118.7 | 0.6             | 15.6             | 90.6  |
| 1988–1992 | 14.6            | 29.9             | 151.8 | 3.4             | 50.1             | 145.9 | 7.8             | 14.1             | 121.7 | 2.0             | 19.8             | 135.8 |
| 1993–1997 | 11.0            | 27.8             | 118.8 | 2.2             | 39.3             | 107.4 | 9.0             | 13.3             | 147.3 | 0.4             | 11.8             | 91.6  |
| 1998–2002 | 18.6            | 41.8             | 135.8 | 5.0             | 74.2             | 132.6 | 9.2             | 14.3             | 133.6 | 2.2             | 20.8             | 138.3 |
| 2003–2007 | 15.2            | 39.6             | 120.6 | 2.6             | 56.4             | 100.8 | 7.0             | 13.6             | 117.3 | 1.6             | 17.9             | 130.3 |
| 2008–2012 | 15.6            | 38.3             | 127.9 | 3.4             | 61.5             | 126.6 | 5.8             | 13.0             | 107.9 | 0.2             | 12.8             | 85.9  |
|           | 15–24           |                  |       | 55–64           |                  |       | 15–24           |                  |       | 55–64           |                  |       |
| 1983–1987 | 0.8             | 15.6             | 112.1 | 1.2             | 34.5             | 81.2  | 0.0             | 5.6              | 82.3  | 3.2             | 32.1             | 162.7 |
| 1988–1992 | 0.8             | 11.3             | 114.1 | 4.4             | 57.7             | 162.6 | 0.2             | 5.2              | 97.9  | 0.8             | 16.7             | 93.8  |
| 1993–1997 | 0.6             | 11.7             | 103.6 | 2.8             | 47.4             | 117.8 | 0.2             | 5.2              | 99.2  | 1.8             | 21.4             | 134.7 |
| 1998–2002 | 0.6             | 15.6             | 98.6  | 4.6             | 81.3             | 127.9 | 0.2             | 6.8              | 96.8  | 2.0             | 23.7             | 126.0 |
| 2003–2007 | 0.6             | 17.3             | 98.9  | 4.6             | 75.7             | 131.1 | 0.0             | 7.4              | 82.8  | 1.6             | 19.7             | 117.8 |
| 2008–2012 | 0.6             | 20.8             | 98.0  | 3.4             | 55.3             | 113.9 | 0.4             | 10.6             | 109.1 | 0.6             | 14.2             | 95.4  |
|           | 25–34           |                  |       | 65–74           |                  |       | 25–34           |                  |       | 65–74           |                  |       |
| 1983–1987 | 2.0             | 31.9             | 124.8 | 2.0             | 54.1             | 123.5 | 0.8             | 12.2             | 113.3 | 1.4             | 32.7             | 104.7 |
| 1988–1992 | 0.6             | 17.9             | 93.5  | 2.4             | 49.6             | 140.7 | 0.2             | 7.9              | 91.3  | 1.4             | 28.1             | 107.6 |
| 1993–1997 | 1.8             | 27.2             | 139.5 | 0.8             | 26.5             | 83.0  | 1.0             | 11.1             | 132.9 | 1.4             | 22.7             | 116.3 |
| 1998–2002 | 1.4             | 29.2             | 108.3 | 4.0             | 63.1             | 138.8 | 0.4             | 11.3             | 97.5  | 2.0             | 27.0             | 128.5 |
| 2003–2007 | 0.8             | 28.3             | 91.4  | 3.4             | 58.5             | 136.3 | 0.8             | 14.5             | 111.4 | 1.2             | 20.2             | 108.7 |
| 2008–2012 | 2.4             | 41.6             | 127.7 | 2.2             | 45.0             | 113.9 | 0.6             | 15.0             | 104.8 | 1.0             | 18.6             | 104.7 |
|           | 35–44           |                  |       | >74 y/o         |                  |       | 35–44           |                  |       | >74 y/o         |                  |       |
| 1983–1987 | 3.4             | 45.9             | 144.2 | 1.2             | 73.2             | 93.4  | 0.6             | 11.8             | 99.5  | 1.8             | 61.0             | 105.7 |
| 1988–1992 | 1.6             | 26.4             | 111.3 | 1.4             | 66.1             | 102.5 | 0.8             | 10.8             | 111.4 | 2.4             | 61.5             | 128.4 |
| 1993–1997 | 2.2             | 33.3             | 135.9 | 0.6             | 39.5             | 75.9  | 1.8             | 14.8             | 174.2 | 2.4             | 49.8             | 144.7 |
| 1998–2002 | 2.4             | 44.1             | 125.1 | 0.6             | 38.4             | 72.9  | 0.4             | 10.1             | 97.8  | 2.0             | 36.5             | 117.4 |
| 2003–2007 | 2.4             | 49.8             | 124.3 | 0.8             | 34.9             | 77.4  | 0.6             | 13.0             | 102.7 | 1.2             | 20.8             | 92.8  |
| 2008–2012 | 1.2             | 35.5             | 95.5  | 2.4             | 50.4             | 121.5 | 0.4             | 13.0             | 95.6  | 2.6             | 28.6             | 148.8 |

Secondary Medical Zone ID: 231

|           | Male            |          |       |          |          |       | Female          |          |       |          |          |       |
|-----------|-----------------|----------|-------|----------|----------|-------|-----------------|----------|-------|----------|----------|-------|
|           | Suicide         |          |       | Suicide  |          |       | Suicide         |          |       | Suicide  |          |       |
|           | Num             | Rate     | × 100 | Num      | Rate     | × 100 | Num             | Rate     | × 100 | Num      | Rate     | × 100 |
|           | per year        | /100,000 |       | per year | /100,000 |       | per year        | /100,000 |       | per year | /100,000 |       |
|           | Total (>10 y/o) |          |       | 45–54    |          |       | Total (>10 y/o) |          |       | 45–54    |          |       |
| 1983–1987 | 29.8            | 40.8     | 140.4 | 7.6      | 68.6     | 135.7 | 16.2            | 17.7     | 126.7 | 3.2      | 23.1     | 134.1 |
| 1988–1992 | 24.2            | 30.3     | 142.1 | 4.8      | 44.5     | 129.5 | 12.0            | 13.2     | 107.9 | 1.0      | 13.0     | 89.1  |
| 1993–1997 | 24.0            | 29.5     | 134.1 | 3.0      | 33.4     | 91.2  | 12.6            | 12.1     | 122.9 | 2.4      | 16.4     | 126.7 |
| 1998–2002 | 31.2            | 39.9     | 122.9 | 4.8      | 51.1     | 91.3  | 13.0            | 13.5     | 112.2 | 2.0      | 16.5     | 109.7 |
| 2003–2007 | 34.0            | 43.0     | 135.8 | 6.2      | 64.7     | 115.7 | 10.0            | 12.7     | 99.2  | 0.6      | 11.3     | 82.4  |
| 2008–2012 | 22.8            | 35.5     | 104.8 | 4.0      | 48.5     | 99.8  | 13.4            | 13.8     | 121.4 | 1.4      | 15.3     | 102.7 |
|           | 15–24           |          |       | 55–64    |          |       | 15–24           |          |       | 55–64    |          |       |
| 1983–1987 | 2.6             | 22.3     | 160.2 | 4.8      | 49.9     | 117.3 | 0.8             | 7.5      | 109.8 | 2.2      | 20.6     | 104.5 |
| 1988–1992 | 1.2             | 11.4     | 114.8 | 6.4      | 54.0     | 152.0 | 0.8             | 6.4      | 122.1 | 1.4      | 15.9     | 89.1  |
| 1993–1997 | 0.6             | 10.3     | 90.7  | 6.4      | 56.1     | 139.3 | 0.4             | 5.1      | 98.6  | 2.4      | 19.3     | 121.7 |
| 1998–2002 | 0.6             | 13.5     | 85.2  | 8.2      | 80.6     | 126.8 | 0.4             | 6.7      | 94.8  | 2.2      | 19.9     | 105.8 |
| 2003–2007 | 0.8             | 16.3     | 93.5  | 9.0      | 80.4     | 139.2 | 0.6             | 9.2      | 102.7 | 2.8      | 20.1     | 120.2 |
| 2008–2012 | 1.4             | 23.1     | 108.7 | 6.4      | 57.1     | 117.6 | 0.4             | 9.1      | 93.9  | 1.8      | 15.7     | 105.3 |
|           | 25–34           |          |       | 65–74    |          |       | 25–34           |          |       | 65–74    |          |       |
| 1983–1987 | 3.0             | 30.2     | 118.2 | 3.4      | 55.3     | 126.2 | 1.4             | 12.4     | 115.6 | 3.8      | 43.2     | 138.3 |
| 1988–1992 | 2.0             | 22.1     | 115.8 | 3.0      | 42.7     | 121.1 | 0.8             | 8.8      | 101.6 | 3.2      | 33.4     | 127.9 |
| 1993–1997 | 3.0             | 27.5     | 140.7 | 4.6      | 48.7     | 152.6 | 0.6             | 7.9      | 94.6  | 2.4      | 22.7     | 116.4 |
| 1998–2002 | 3.0             | 30.8     | 114.1 | 5.6      | 56.5     | 124.3 | 1.2             | 12.2     | 105.6 | 2.2      | 21.5     | 102.4 |
| 2003–2007 | 2.2             | 29.5     | 95.2  | 5.4      | 55.4     | 129.1 | 0.8             | 12.0     | 92.6  | 1.2      | 15.7     | 84.5  |
| 2008–2012 | 2.6             | 35.1     | 107.8 | 2.2      | 33.6     | 85.1  | 1.2             | 15.4     | 107.4 | 3.0      | 22.9     | 128.7 |
|           | 35–44           |          |       | >74 y/o  |          |       | 35–44           |          |       | >74 y/o  |          |       |
| 1983–1987 | 3.6             | 34.2     | 107.4 | 4.8      | 121.0    | 154.5 | 1.4             | 12.2     | 103.5 | 3.4      | 65.5     | 113.5 |
| 1988–1992 | 3.8             | 31.4     | 132.5 | 3.0      | 73.2     | 113.6 | 1.0             | 9.7      | 100.0 | 3.8      | 56.7     | 118.5 |
| 1993–1997 | 3.0             | 29.0     | 118.4 | 3.4      | 68.6     | 131.8 | 1.0             | 9.3      | 108.9 | 3.4      | 41.4     | 120.4 |
| 1998–2002 | 4.8             | 46.8     | 132.9 | 4.2      | 69.4     | 131.6 | 1.8             | 13.7     | 132.5 | 3.2      | 32.9     | 105.8 |
| 2003–2007 | 5.2             | 54.5     | 135.9 | 5.2      | 65.7     | 145.9 | 1.6             | 14.4     | 114.3 | 2.2      | 20.2     | 89.9  |
| 2008–2012 | 2.6             | 34.9     | 93.7  | 3.6      | 44.5     | 107.2 | 1.0             | 13.0     | 95.9  | 4.6      | 30.0     | 155.7 |



Secondary Medical Zone ID: 232

|           | Male            |          |       |          |          |       | Female          |          |       |          |          |       |
|-----------|-----------------|----------|-------|----------|----------|-------|-----------------|----------|-------|----------|----------|-------|
|           | Suicide         |          |       | Suicide  |          |       | Suicide         |          |       | Suicide  |          |       |
|           | Num             | Rate     | × 100 | Num      | Rate     | × 100 | Num             | Rate     | × 100 | Num      | Rate     | × 100 |
|           | per year        | /100,000 |       | per year | /100,000 |       | per year        | /100,000 |       | per year | /100,000 |       |
|           | Total (>10 y/o) |          |       | 45–54    |          |       | Total (>10 y/o) |          |       | 45–54    |          |       |
| 1983–1987 | 18.6            | 37.6     | 128.8 | 5.6      | 69.8     | 138.1 | 6.8             | 14.1     | 87.0  | 1.6      | 18.9     | 109.6 |
| 1988–1992 | 13.8            | 27.7     | 123.6 | 3.6      | 45.9     | 133.7 | 10.0            | 13.9     | 120.2 | 1.2      | 15.4     | 105.6 |
| 1993–1997 | 13.0            | 26.9     | 117.1 | 4.6      | 51.2     | 140.1 | 7.6             | 11.4     | 111.3 | 0.8      | 12.5     | 97.1  |
| 1998–2002 | 19.4            | 39.4     | 123.4 | 3.8      | 59.1     | 105.6 | 8.8             | 13.6     | 113.6 | 0.8      | 14.4     | 95.6  |
| 2003–2007 | 15.8            | 37.9     | 110.9 | 3.2      | 59.6     | 106.6 | 9.4             | 14.0     | 126.1 | 1.2      | 15.7     | 114.6 |
| 2008–2012 | 13.8            | 35.6     | 109.6 | 1.8      | 46.6     | 95.8  | 5.6             | 13.1     | 99.4  | 0.2      | 12.6     | 84.6  |
| -----     |                 |          |       |          |          |       |                 |          |       |          |          |       |
|           | 15–24           |          |       | 55–64    |          |       | 15–24           |          |       | 55–64    |          |       |
| 1983–1987 | 0.8             | 15.2     | 109.1 | 3.2      | 47.5     | 111.8 | 0.4             | 7.1      | 103.7 | 0.4      | 13.9     | 70.6  |
| 1988–1992 | 0.6             | 10.6     | 107.1 | 3.2      | 42.3     | 119.1 | 0.2             | 5.1      | 97.1  | 1.8      | 20.0     | 111.9 |
| 1993–1997 | 1.2             | 14.5     | 127.8 | 2.4      | 39.9     | 99.0  | 0.2             | 5.2      | 99.0  | 2.2      | 21.5     | 135.2 |
| 1998–2002 | 0.8             | 17.1     | 108.4 | 4.8      | 73.1     | 115.1 | 0.2             | 6.8      | 97.2  | 3.0      | 26.2     | 139.0 |
| 2003–2007 | 0.6             | 18.0     | 103.3 | 5.4      | 73.8     | 127.8 | 0.4             | 9.8      | 108.7 | 1.6      | 18.4     | 110.0 |
| 2008–2012 | 0.4             | 20.6     | 96.9  | 4.0      | 55.6     | 114.4 | 0.6             | 12.0     | 123.6 | 1.6      | 17.2     | 115.4 |
| -----     |                 |          |       |          |          |       |                 |          |       |          |          |       |
|           | 25–34           |          |       | 65–74    |          |       | 25–34           |          |       | 65–74    |          |       |
| 1983–1987 | 2.0             | 30.7     | 120.0 | 2.0      | 47.6     | 108.7 | 0.2             | 8.8      | 81.8  | 1.6      | 29.9     | 95.8  |
| 1988–1992 | 1.0             | 20.8     | 108.7 | 1.4      | 33.9     | 96.1  | 0.8             | 10.4     | 119.6 | 1.4      | 24.0     | 91.9  |
| 1993–1997 | 0.6             | 18.5     | 94.6  | 1.4      | 29.4     | 92.3  | 0.4             | 8.5      | 102.2 | 1.8      | 22.6     | 116.0 |
| 1998–2002 | 1.4             | 29.3     | 108.4 | 2.8      | 47.3     | 103.9 | 0.4             | 11.3     | 97.4  | 1.6      | 21.7     | 103.1 |
| 2003–2007 | 1.0             | 30.2     | 97.5  | 2.6      | 45.3     | 105.7 | 0.2             | 11.7     | 89.9  | 1.2      | 18.4     | 98.9  |
| 2008–2012 | 0.8             | 31.7     | 97.4  | 3.0      | 46.7     | 118.3 | 0.6             | 15.2     | 106.4 | 1.6      | 20.0     | 112.4 |
| -----     |                 |          |       |          |          |       |                 |          |       |          |          |       |
|           | 35–44           |          |       | >74 y/o  |          |       | 35–44           |          |       | >74 y/o  |          |       |
| 1983–1987 | 2.8             | 36.5     | 114.7 | 2.2      | 86.1     | 109.9 | 1.4             | 13.9     | 117.3 | 1.2      | 39.8     | 68.9  |
| 1988–1992 | 2.6             | 31.2     | 131.6 | 1.4      | 56.7     | 87.8  | 1.0             | 10.9     | 113.0 | 3.6      | 65.6     | 137.0 |
| 1993–1997 | 1.4             | 25.6     | 104.5 | 1.4      | 48.3     | 92.8  | 0.4             | 8.2      | 97.0  | 1.8      | 31.8     | 92.5  |
| 1998–2002 | 2.4             | 43.1     | 122.5 | 3.4      | 74.6     | 141.5 | 1.0             | 12.7     | 123.1 | 1.8      | 27.4     | 88.2  |
| 2003–2007 | 1.2             | 35.9     | 89.5  | 1.8      | 42.6     | 94.6  | 1.4             | 16.4     | 130.2 | 3.4      | 35.4     | 157.6 |
| 2008–2012 | 2.4             | 43.4     | 116.6 | 1.4      | 34.4     | 82.9  | 0.2             | 12.2     | 89.9  | 0.8      | 13.4     | 69.5  |

Secondary Medical Zone ID: 233

|           | Male            |          |       |          |          |       | Female          |          |       |          |          |       |
|-----------|-----------------|----------|-------|----------|----------|-------|-----------------|----------|-------|----------|----------|-------|
|           | Suicide         |          |       | Suicide  |          |       | Suicide         |          |       | Suicide  |          |       |
|           | Num             | Rate     | × 100 | Num      | Rate     | × 100 | Num             | Rate     | × 100 | Num      | Rate     | × 100 |
|           | per year        | /100,000 |       | per year | /100,000 |       | per year        | /100,000 |       | per year | /100,000 |       |
|           | Total (>10 y/o) |          |       | 45–54    |          |       | Total (>10 y/o) |          |       | 45–54    |          |       |
| 1983–1987 | 31.0            | 31.8     | 96.3  | 7.8      | 52.2     | 103.3 | 13.6            | 12.8     | 77.3  | 3.2      | 18.4     | 106.9 |
| 1988–1992 | 30.4            | 26.9     | 114.3 | 4.6      | 32.5     | 94.5  | 14.2            | 11.5     | 85.1  | 2.8      | 16.2     | 110.6 |
| 1993–1997 | 24.4            | 23.3     | 89.6  | 5.8      | 35.0     | 95.7  | 12.0            | 9.7      | 82.9  | 2.0      | 12.5     | 96.8  |
| 1998–2002 | 35.0            | 32.4     | 86.5  | 8.6      | 48.2     | 86.1  | 12.8            | 11.1     | 78.0  | 2.0      | 13.2     | 87.6  |
| 2003–2007 | 41.0            | 36.6     | 97.3  | 10.8     | 60.4     | 108.0 | 13.4            | 11.5     | 84.6  | 2.2      | 13.3     | 96.9  |
| 2008–2012 | 46.0            | 38.7     | 116.0 | 8.6      | 54.2     | 111.6 | 15.0            | 13.3     | 94.2  | 2.2      | 14.6     | 98.1  |
| -----     |                 |          |       |          |          |       |                 |          |       |          |          |       |
|           | 15–24           |          |       | 55–64    |          |       | 15–24           |          |       | 55–64    |          |       |
| 1983–1987 | 2.0             | 13.4     | 96.4  | 4.8      | 37.7     | 88.6  | 0.2             | 4.6      | 67.8  | 2.0      | 15.3     | 77.6  |
| 1988–1992 | 1.4             | 9.3      | 94.1  | 7.4      | 45.9     | 129.2 | 0.4             | 4.2      | 80.2  | 2.8      | 17.2     | 96.1  |
| 1993–1997 | 1.8             | 11.0     | 96.9  | 5.2      | 38.2     | 95.0  | 0.6             | 4.7      | 90.1  | 2.0      | 14.0     | 87.9  |
| 1998–2002 | 2.0             | 13.9     | 88.2  | 8.6      | 62.4     | 98.2  | 0.6             | 5.9      | 83.7  | 1.6      | 14.9     | 79.2  |
| 2003–2007 | 2.2             | 15.8     | 90.6  | 8.8      | 55.1     | 95.5  | 1.0             | 8.4      | 93.3  | 2.2      | 15.2     | 91.0  |
| 2008–2012 | 3.8             | 25.7     | 121.1 | 10.0     | 52.1     | 107.3 | 1.6             | 11.9     | 122.8 | 2.4      | 14.2     | 95.4  |
| -----     |                 |          |       |          |          |       |                 |          |       |          |          |       |
|           | 25–34           |          |       | 65–74    |          |       | 25–34           |          |       | 65–74    |          |       |
| 1983–1987 | 4.6             | 26.8     | 104.9 | 2.6      | 36.9     | 84.3  | 0.4             | 6.3      | 58.5  | 3.4      | 30.7     | 98.3  |
| 1988–1992 | 4.2             | 25.1     | 131.4 | 2.8      | 32.1     | 91.2  | 1.4             | 8.9      | 102.3 | 2.0      | 18.3     | 70.3  |
| 1993–1997 | 3.0             | 20.8     | 106.7 | 2.8      | 26.9     | 84.4  | 1.4             | 9.0      | 107.9 | 2.0      | 15.2     | 77.9  |
| 1998–2002 | 3.2             | 24.1     | 89.3  | 4.8      | 40.7     | 89.4  | 1.6             | 11.4     | 98.5  | 3.2      | 20.4     | 97.1  |
| 2003–2007 | 4.4             | 29.7     | 95.7  | 6.6      | 50.5     | 117.6 | 1.8             | 12.8     | 98.2  | 1.2      | 12.6     | 67.5  |
| 2008–2012 | 7.8             | 45.3     | 139.2 | 4.4      | 38.3     | 97.0  | 2.4             | 16.1     | 112.1 | 1.6      | 14.7     | 82.7  |
| -----     |                 |          |       |          |          |       |                 |          |       |          |          |       |
|           | 35–44           |          |       | >74 y/o  |          |       | 35–44           |          |       | >74 y/o  |          |       |
| 1983–1987 | 6.2             | 34.8     | 109.5 | 3.0      | 67.5     | 86.2  | 0.8             | 8.5      | 71.9  | 3.6      | 48.6     | 84.2  |
| 1988–1992 | 5.8             | 28.3     | 119.5 | 4.2      | 71.4     | 110.7 | 1.2             | 8.3      | 85.8  | 3.6      | 38.3     | 79.9  |
| 1993–1997 | 3.2             | 20.0     | 81.4  | 2.4      | 41.5     | 79.8  | 1.0             | 7.1      | 84.1  | 3.0      | 26.4     | 76.8  |
| 1998–2002 | 4.6             | 31.1     | 88.4  | 3.2      | 44.3     | 84.1  | 1.6             | 10.3     | 99.2  | 2.0      | 16.3     | 52.5  |
| 2003–2007 | 6.2             | 42.3     | 105.5 | 2.0      | 27.2     | 60.3  | 1.4             | 11.4     | 89.9  | 3.6      | 20.1     | 89.4  |
| 2008–2012 | 6.0             | 39.3     | 105.6 | 5.4      | 45.2     | 109.0 | 2.4             | 14.9     | 109.9 | 2.4      | 13.4     | 69.6  |

Secondary Medical Zone ID: 234

|                 | Male            |                  |       |                 |                  |       | Female          |                  |       |                 |                  |       |
|-----------------|-----------------|------------------|-------|-----------------|------------------|-------|-----------------|------------------|-------|-----------------|------------------|-------|
|                 | Suicide         |                  |       | Suicide         |                  |       | Suicide         |                  |       | Suicide         |                  |       |
|                 | Num<br>per year | Rate<br>/100,000 | × 100 | Num<br>per year | Rate<br>/100,000 | × 100 | Num<br>per year | Rate<br>/100,000 | × 100 | Num<br>per year | Rate<br>/100,000 | × 100 |
|                 |                 |                  |       |                 |                  |       |                 |                  |       |                 |                  |       |
| Total (>10 y/o) | 45–54           | Total (>10 y/o)  | 45–54 |                 |                  |       |                 |                  |       |                 |                  |       |
| 1983–1987       | 18.6            | 34.8             | 110.3 | 5.8             | 66.5             | 131.5 | 9.2             | 14.6             | 93.0  | 1.8             | 18.8             | 109.3 |
| 1988–1992       | 17.4            | 27.8             | 124.7 | 3.8             | 43.6             | 127.1 | 13.6            | 14.7             | 131.8 | 1.2             | 14.9             | 102.2 |
| 1993–1997       | 19.6            | 28.9             | 132.4 | 4.2             | 43.2             | 118.1 | 10.6            | 11.8             | 121.4 | 1.4             | 14.2             | 109.8 |
| 1998–2002       | 22.4            | 37.9             | 110.5 | 6.0             | 62.6             | 111.8 | 10.0            | 12.7             | 106.2 | 0.4             | 11.9             | 78.7  |
| 2003–2007       | 24.0            | 38.8             | 119.3 | 6.0             | 69.2             | 123.8 | 8.8             | 12.6             | 103.6 | 2.0             | 17.2             | 125.2 |
| 2008–2012       | 21.4            | 37.2             | 116.1 | 3.2             | 48.8             | 100.3 | 9.4             | 13.0             | 109.9 | 0.4             | 12.2             | 81.8  |
|                 | 15–24           |                  |       | 55–64           |                  |       | 15–24           |                  |       | 55–64           |                  |       |
| 1983–1987       | 0.4             | 11.4             | 82.0  | 2.0             | 34.2             | 80.4  | 0.6             | 7.4              | 108.8 | 1.8             | 19.8             | 100.5 |
| 1988–1992       | 0.8             | 10.6             | 107.0 | 3.2             | 38.6             | 108.8 | 0.4             | 5.5              | 103.6 | 2.4             | 21.3             | 119.5 |
| 1993–1997       | 1.4             | 13.8             | 122.1 | 3.8             | 46.3             | 115.1 | 0.4             | 5.4              | 103.5 | 1.2             | 15.4             | 96.9  |
| 1998–2002       | 0.0             | 11.3             | 71.7  | 6.2             | 77.8             | 122.4 | 0.2             | 6.2              | 88.2  | 2.8             | 24.4             | 129.9 |
| 2003–2007       | 0.8             | 16.8             | 96.4  | 4.8             | 59.2             | 102.5 | 0.4             | 8.7              | 96.3  | 1.8             | 18.3             | 109.5 |
| 2008–2012       | 1.8             | 26.3             | 123.8 | 5.0             | 52.7             | 108.6 | 0.6             | 10.7             | 110.5 | 1.0             | 13.9             | 93.1  |
|                 | 25–34           |                  |       | 65–74           |                  |       | 25–34           |                  |       | 65–74           |                  |       |
| 1983–1987       | 2.6             | 29.3             | 114.6 | 2.0             | 43.6             | 99.5  | 0.4             | 8.8              | 81.3  | 1.6             | 27.4             | 87.8  |
| 1988–1992       | 1.0             | 17.5             | 91.5  | 2.4             | 40.3             | 114.4 | 1.0             | 10.3             | 118.5 | 2.8             | 32.5             | 124.4 |
| 1993–1997       | 0.6             | 16.2             | 83.2  | 3.0             | 40.7             | 127.6 | 0.6             | 8.7              | 104.2 | 3.4             | 30.8             | 158.0 |
| 1998–2002       | 1.8             | 28.0             | 103.6 | 3.6             | 49.8             | 109.4 | 0.8             | 12.0             | 103.2 | 1.4             | 18.8             | 89.6  |
| 2003–2007       | 2.6             | 35.4             | 114.3 | 3.4             | 48.2             | 112.4 | 0.2             | 10.5             | 80.6  | 1.6             | 19.4             | 104.2 |
| 2008–2012       | 1.8             | 32.5             | 99.9  | 3.4             | 46.4             | 117.5 | 0.0             | 10.9             | 75.9  | 2.8             | 24.6             | 138.4 |
|                 | 35–44           |                  |       | >74 y/o         |                  |       | 35–44           |                  |       | >74 y/o         |                  |       |
| 1983–1987       | 3.0             | 33.7             | 106.0 | 2.8             | 94.6             | 120.8 | 0.6             | 10.4             | 88.3  | 2.4             | 54.2             | 94.0  |
| 1988–1992       | 4.2             | 35.3             | 149.1 | 2.0             | 62.0             | 96.2  | 0.8             | 9.5              | 98.7  | 5.0             | 74.8             | 156.3 |
| 1993–1997       | 3.2             | 32.4             | 132.3 | 3.4             | 74.9             | 143.8 | 0.2             | 6.6              | 77.8  | 3.4             | 43.8             | 127.4 |
| 1998–2002       | 3.0             | 39.8             | 113.0 | 1.8             | 45.0             | 85.4  | 0.4             | 9.0              | 87.1  | 4.0             | 41.7             | 134.3 |
| 2003–2007       | 1.6             | 33.2             | 82.8  | 4.8             | 69.8             | 154.9 | 0.4             | 11.1             | 87.8  | 2.4             | 22.8             | 101.6 |
| 2008–2012       | 3.6             | 44.9             | 120.7 | 2.4             | 39.8             | 96.0  | 1.0             | 14.2             | 105.0 | 3.6             | 26.5             | 138.1 |

Secondary Medical Zone ID: 235

|                 | Male            |                  |       |                 |                  |       | Female          |                  |       |                 |                  |       |
|-----------------|-----------------|------------------|-------|-----------------|------------------|-------|-----------------|------------------|-------|-----------------|------------------|-------|
|                 | Suicide         |                  |       | Suicide         |                  |       | Suicide         |                  |       | Suicide         |                  |       |
|                 | Num<br>per year | Rate<br>/100,000 | × 100 | Num<br>per year | Rate<br>/100,000 | × 100 | Num<br>per year | Rate<br>/100,000 | × 100 | Num<br>per year | Rate<br>/100,000 | × 100 |
|                 |                 |                  |       |                 |                  |       |                 |                  |       |                 |                  |       |
| Total (>10 y/o) | 45–54           | Total (>10 y/o)  | 45–54 |                 |                  |       |                 |                  |       |                 |                  |       |
| 1983–1987       | 37.2            | 35.5             | 112.1 | 10.2            | 61.1             | 120.7 | 16.8            | 14.1             | 88.5  | 2.8             | 16.7             | 97.1  |
| 1988–1992       | 30.8            | 27.2             | 114.8 | 8.4             | 46.9             | 136.6 | 16.2            | 12.0             | 91.6  | 2.8             | 15.5             | 106.0 |
| 1993–1997       | 36.6            | 29.3             | 126.0 | 10.2            | 49.5             | 135.3 | 16.6            | 10.9             | 103.5 | 3.2             | 15.1             | 116.7 |
| 1998–2002       | 46.6            | 39.3             | 110.7 | 13.4            | 68.0             | 121.6 | 15.8            | 11.6             | 88.2  | 3.6             | 17.2             | 114.1 |
| 2003–2007       | 51.0            | 41.5             | 120.0 | 13.6            | 77.8             | 139.1 | 13.8            | 11.2             | 84.1  | 1.6             | 11.9             | 86.7  |
| 2008–2012       | 41.0            | 36.6             | 107.7 | 7.6             | 52.9             | 108.9 | 16.4            | 12.9             | 98.3  | 2.2             | 15.1             | 101.4 |
|                 | 15–24           |                  |       | 55–64           |                  |       | 15–24           |                  |       | 55–64           |                  |       |
| 1983–1987       | 2.0             | 15.1             | 108.0 | 6.4             | 45.1             | 106.1 | 1.8             | 9.4              | 137.8 | 2.6             | 17.0             | 86.2  |
| 1988–1992       | 1.2             | 9.3              | 94.4  | 7.4             | 44.7             | 125.8 | 0.2             | 3.7              | 71.0  | 2.8             | 16.8             | 94.2  |
| 1993–1997       | 1.0             | 9.4              | 83.3  | 8.2             | 50.0             | 124.1 | 0.8             | 5.4              | 103.6 | 3.4             | 18.3             | 115.2 |
| 1998–2002       | 2.6             | 17.6             | 111.1 | 9.2             | 60.8             | 95.7  | 0.4             | 5.6              | 79.3  | 3.0             | 18.3             | 97.4  |
| 2003–2007       | 2.2             | 18.0             | 103.1 | 12.8            | 69.6             | 120.6 | 0.6             | 7.4              | 82.2  | 1.8             | 13.4             | 79.9  |
| 2008–2012       | 2.6             | 23.3             | 109.9 | 9.4             | 51.3             | 105.6 | 1.4             | 11.7             | 120.8 | 2.2             | 13.4             | 90.1  |
|                 | 25–34           |                  |       | 65–74           |                  |       | 25–34           |                  |       | 65–74           |                  |       |
| 1983–1987       | 4.6             | 27.9             | 109.3 | 3.6             | 44.4             | 101.3 | 1.0             | 8.4              | 78.4  | 2.6             | 24.9             | 79.7  |
| 1988–1992       | 3.6             | 23.5             | 122.8 | 3.4             | 35.5             | 100.7 | 1.0             | 8.0              | 91.7  | 2.8             | 21.6             | 82.8  |
| 1993–1997       | 3.6             | 23.6             | 120.7 | 5.4             | 41.3             | 129.6 | 0.6             | 6.7              | 80.5  | 3.4             | 20.7             | 106.2 |
| 1998–2002       | 5.8             | 33.9             | 125.4 | 5.6             | 43.2             | 95.1  | 1.0             | 9.6              | 82.5  | 3.2             | 19.8             | 94.5  |
| 2003–2007       | 5.8             | 35.7             | 115.0 | 6.8             | 48.6             | 113.3 | 1.4             | 11.4             | 87.6  | 2.4             | 16.4             | 88.0  |
| 2008–2012       | 5.6             | 38.1             | 116.9 | 6.2             | 43.6             | 110.5 | 1.6             | 13.5             | 94.6  | 1.6             | 13.9             | 78.2  |
|                 | 35–44           |                  |       | >74 y/o         |                  |       | 35–44           |                  |       | >74 y/o         |                  |       |
| 1983–1987       | 5.4             | 29.8             | 93.7  | 5.0             | 99.8             | 127.4 | 3.0             | 13.8             | 117.0 | 3.0             | 41.1             | 71.3  |
| 1988–1992       | 4.0             | 22.1             | 93.4  | 2.8             | 53.9             | 83.6  | 2.0             | 10.2             | 105.2 | 4.6             | 45.0             | 94.1  |
| 1993–1997       | 4.8             | 27.7             | 113.0 | 3.4             | 52.3             | 100.5 | 1.0             | 7.3              | 86.5  | 4.2             | 33.0             | 95.9  |
| 1998–2002       | 6.6             | 42.3             | 120.2 | 3.4             | 45.0             | 85.3  | 1.0             | 8.7              | 84.0  | 3.6             | 23.8             | 76.6  |
| 2003–2007       | 5.6             | 40.3             | 100.6 | 4.2             | 41.7             | 92.7  | 1.4             | 11.4             | 90.4  | 4.6             | 23.2             | 103.3 |
| 2008–2012       | 5.2             | 36.4             | 97.8  | 4.4             | 37.7             | 90.9  | 1.8             | 13.0             | 95.7  | 5.6             | 23.7             | 123.2 |

Secondary Medical Zone ID: 236

|           | Male            |                  |       |                 |                  |       | Female          |                  |       |                 |                  |       |
|-----------|-----------------|------------------|-------|-----------------|------------------|-------|-----------------|------------------|-------|-----------------|------------------|-------|
|           | Suicide         |                  |       | Suicide         |                  |       | Suicide         |                  |       | Suicide         |                  |       |
|           | Num<br>per year | Rate<br>/100,000 | × 100 | Num<br>per year | Rate<br>/100,000 | × 100 | Num<br>per year | Rate<br>/100,000 | × 100 | Num<br>per year | Rate<br>/100,000 | × 100 |
|           |                 |                  |       |                 |                  |       |                 |                  |       |                 |                  |       |
|           | Total (>10 y/o) |                  |       | 45–54           |                  |       | Total (>10 y/o) |                  |       | 45–54           |                  |       |
| 1983–1987 | 40.8            | 37.7             | 121.4 | 9.8             | 58.4             | 115.4 | 16.2            | 14.0             | 88.3  | 2.8             | 16.7             | 97.0  |
| 1988–1992 | 31.6            | 27.3             | 116.1 | 6.4             | 38.1             | 111.0 | 14.4            | 11.5             | 84.2  | 2.0             | 13.3             | 90.7  |
| 1993–1997 | 31.8            | 26.7             | 109.2 | 9.4             | 46.4             | 126.8 | 15.8            | 10.8             | 99.6  | 3.6             | 16.1             | 124.3 |
| 1998–2002 | 50.4            | 39.9             | 115.6 | 12.8            | 64.5             | 115.3 | 14.6            | 11.4             | 82.9  | 1.2             | 10.8             | 72.0  |
| 2003–2007 | 46.4            | 38.6             | 106.7 | 9.6             | 57.1             | 102.2 | 16.4            | 12.0             | 94.5  | 1.8             | 12.4             | 90.5  |
| 2008–2012 | 45.2            | 37.3             | 112.2 | 6.2             | 44.0             | 90.5  | 11.4            | 11.4             | 77.1  | 1.6             | 12.8             | 86.1  |
|           | 15–24           |                  |       | 55–64           |                  |       | 15–24           |                  |       | 55–64           |                  |       |
| 1983–1987 | 1.4             | 11.0             | 79.0  | 7.6             | 52.3             | 123.0 | 1.0             | 6.7              | 98.1  | 2.2             | 16.4             | 83.3  |
| 1988–1992 | 2.0             | 10.7             | 108.5 | 6.6             | 40.9             | 115.2 | 0.0             | 3.0              | 56.6  | 2.6             | 16.4             | 92.0  |
| 1993–1997 | 1.8             | 10.9             | 96.1  | 6.4             | 41.3             | 102.6 | 0.4             | 4.0              | 77.0  | 2.4             | 14.9             | 93.8  |
| 1998–2002 | 3.8             | 19.6             | 123.9 | 12.4            | 76.0             | 119.7 | 0.4             | 5.2              | 74.5  | 2.6             | 17.1             | 90.9  |
| 2003–2007 | 3.2             | 19.6             | 112.6 | 9.2             | 53.8             | 93.2  | 0.8             | 7.6              | 84.2  | 4.6             | 20.7             | 123.9 |
| 2008–2012 | 4.4             | 28.2             | 132.9 | 11.6            | 57.9             | 119.2 | 1.8             | 12.5             | 129.0 | 1.8             | 12.5             | 83.9  |
|           | 25–34           |                  |       | 65–74           |                  |       | 25–34           |                  |       | 65–74           |                  |       |
| 1983–1987 | 2.8             | 20.2             | 79.2  | 4.4             | 53.3             | 121.8 | 1.8             | 11.0             | 101.9 | 2.2             | 23.9             | 76.6  |
| 1988–1992 | 3.0             | 20.4             | 106.8 | 3.4             | 36.3             | 103.1 | 1.4             | 9.0              | 103.4 | 3.4             | 26.6             | 101.8 |
| 1993–1997 | 2.6             | 18.8             | 96.5  | 4.0             | 33.8             | 106.1 | 1.2             | 8.3              | 99.1  | 2.6             | 18.2             | 93.2  |
| 1998–2002 | 5.4             | 31.4             | 116.3 | 6.2             | 46.4             | 101.9 | 3.2             | 15.6             | 134.3 | 2.8             | 18.7             | 89.1  |
| 2003–2007 | 6.6             | 38.2             | 123.3 | 6.2             | 45.2             | 105.3 | 2.4             | 14.3             | 110.0 | 2.6             | 17.2             | 92.2  |
| 2008–2012 | 5.6             | 37.5             | 115.1 | 5.4             | 40.2             | 101.8 | 1.4             | 12.8             | 89.3  | 1.8             | 14.6             | 81.9  |
|           | 35–44           |                  |       | >74 y/o         |                  |       | 35–44           |                  |       | >74 y/o         |                  |       |
| 1983–1987 | 12.0            | 54.5             | 171.3 | 2.8             | 67.7             | 86.4  | 2.6             | 12.7             | 107.8 | 3.4             | 47.1             | 81.7  |
| 1988–1992 | 5.8             | 28.3             | 119.5 | 4.2             | 72.9             | 113.0 | 2.4             | 11.1             | 115.0 | 2.6             | 29.0             | 60.5  |
| 1993–1997 | 5.0             | 28.1             | 114.6 | 2.6             | 43.6             | 83.7  | 1.6             | 9.0              | 106.4 | 4.0             | 32.3             | 93.8  |
| 1998–2002 | 6.2             | 38.9             | 110.4 | 3.4             | 45.2             | 85.7  | 0.8             | 7.9              | 76.0  | 3.4             | 23.6             | 75.9  |
| 2003–2007 | 7.0             | 45.2             | 112.8 | 4.6             | 44.7             | 99.3  | 1.0             | 9.9              | 78.5  | 3.2             | 17.9             | 79.9  |
| 2008–2012 | 6.8             | 40.4             | 108.7 | 5.2             | 42.3             | 101.9 | 0.6             | 9.4              | 69.1  | 2.4             | 13.0             | 67.8  |

Secondary Medical Zone ID: 237

|           | Male            |          |       |          |          |       | Female          |          |       |          |          |       |
|-----------|-----------------|----------|-------|----------|----------|-------|-----------------|----------|-------|----------|----------|-------|
|           | Suicide         |          |       | Suicide  |          |       | Suicide         |          |       | Suicide  |          |       |
|           | Num             | Rate     | × 100 | Num      | Rate     | × 100 | Num             | Rate     | × 100 | Num      | Rate     | × 100 |
|           | per year        | /100,000 |       | per year | /100,000 |       | per year        | /100,000 |       | per year | /100,000 |       |
|           | Total (>10 y/o) |          |       | 45–54    |          |       | Total (>10 y/o) |          |       | 45–54    |          |       |
| 1983–1987 | 14.4            | 35.4     | 118.5 | 4.0      | 62.8     | 124.2 | 9.4             | 17.2     | 124.4 | 1.4      | 19.2     | 111.4 |
| 1988–1992 | 17.0            | 32.1     | 163.6 | 3.4      | 50.7     | 147.6 | 8.2             | 14.1     | 120.9 | 1.6      | 18.3     | 125.3 |
| 1993–1997 | 15.4            | 30.3     | 148.2 | 3.2      | 46.4     | 126.7 | 6.8             | 11.8     | 118.1 | 0.4      | 12.1     | 93.3  |
| 1998–2002 | 17.0            | 38.8     | 124.9 | 4.0      | 63.9     | 114.2 | 7.6             | 13.3     | 117.4 | 1.4      | 17.9     | 118.6 |
| 2003–2007 | 18.8            | 42.0     | 142.6 | 3.6      | 67.1     | 120.0 | 5.8             | 12.5     | 107.3 | 0.4      | 12.9     | 94.2  |
| 2008–2012 | 19.0            | 40.7     | 148.3 | 3.0      | 60.3     | 124.0 | 4.4             | 12.8     | 98.6  | 0.6      | 15.3     | 102.8 |
|           | 15–24           |          |       | 55–64    |          |       | 15–24           |          |       | 55–64    |          |       |
| 1983–1987 | 0.6             | 14.9     | 107.0 | 2.6      | 44.6     | 105.1 | 0.4             | 7.7      | 112.2 | 1.6      | 21.5     | 109.0 |
| 1988–1992 | 0.8             | 11.9     | 120.1 | 3.4      | 47.0     | 132.5 | 0.6             | 7.0      | 133.4 | 0.6      | 15.1     | 84.7  |
| 1993–1997 | 0.2             | 10.5     | 92.9  | 3.8      | 54.7     | 135.9 | 0.6             | 7.0      | 133.3 | 1.0      | 16.5     | 103.9 |
| 1998–2002 | 1.2             | 19.5     | 123.5 | 2.2      | 58.1     | 91.5  | 0.4             | 7.8      | 111.2 | 1.0      | 19.4     | 102.9 |
| 2003–2007 | 1.0             | 20.4     | 116.8 | 4.4      | 73.8     | 127.8 | 0.4             | 10.0     | 111.1 | 0.8      | 16.9     | 100.7 |
| 2008–2012 | 1.4             | 27.4     | 129.2 | 3.6      | 55.1     | 113.4 | 0.0             | 8.4      | 86.6  | 0.4      | 13.7     | 91.7  |
|           | 25–34           |          |       | 65–74    |          |       | 25–34           |          |       | 65–74    |          |       |
| 1983–1987 | 0.6             | 21.1     | 82.5  | 1.4      | 43.0     | 98.3  | 0.8             | 12.6     | 116.6 | 1.4      | 31.3     | 100.2 |
| 1988–1992 | 1.4             | 25.0     | 130.9 | 2.0      | 41.6     | 118.0 | 0.6             | 10.0     | 115.7 | 1.6      | 28.1     | 107.5 |
| 1993–1997 | 0.6             | 19.6     | 100.1 | 4.0      | 57.0     | 178.6 | 0.4             | 9.0      | 107.6 | 1.2      | 19.7     | 101.3 |
| 1998–2002 | 2.4             | 37.6     | 139.4 | 2.4      | 46.8     | 102.9 | 0.4             | 11.9     | 102.3 | 1.2      | 20.6     | 98.1  |
| 2003–2007 | 1.8             | 37.4     | 120.6 | 2.4      | 47.7     | 111.1 | 0.4             | 13.2     | 101.2 | 0.6      | 16.4     | 87.8  |
| 2008–2012 | 2.4             | 42.3     | 130.0 | 2.8      | 50.7     | 128.5 | 0.4             | 14.5     | 101.5 | 1.0      | 18.9     | 106.4 |
|           | 35–44           |          |       | >74 y/o  |          |       | 35–44           |          |       | >74 y/o  |          |       |
| 1983–1987 | 3.0             | 43.0     | 135.2 | 2.0      | 85.6     | 109.3 | 0.4             | 11.1     | 94.3  | 3.4      | 92.5     | 160.4 |
| 1988–1992 | 3.2             | 37.4     | 157.6 | 2.8      | 89.3     | 138.4 | 0.8             | 10.9     | 112.9 | 2.4      | 56.1     | 117.2 |
| 1993–1997 | 2.2             | 33.2     | 135.5 | 1.4      | 49.8     | 95.6  | 0.8             | 10.5     | 123.6 | 2.4      | 43.7     | 127.1 |
| 1998–2002 | 1.2             | 34.2     | 97.1  | 3.6      | 77.9     | 147.8 | 0.0             | 8.5      | 82.6  | 3.2      | 44.9     | 144.8 |
| 2003–2007 | 1.4             | 42.0     | 104.7 | 4.2      | 72.6     | 161.2 | 0.0             | 10.8     | 85.8  | 3.2      | 35.8     | 159.3 |
| 2008–2012 | 1.8             | 41.6     | 111.9 | 4.0      | 61.4     | 147.9 | 0.4             | 13.6     | 100.3 | 1.6      | 19.3     | 100.1 |

Secondary Medical Zone ID: 238

|                 | Male            |                  |       |                 |                  |       | Female          |                  |       |                 |                  |       |
|-----------------|-----------------|------------------|-------|-----------------|------------------|-------|-----------------|------------------|-------|-----------------|------------------|-------|
|                 | Suicide         |                  |       | Suicide         |                  |       | Suicide         |                  |       | Suicide         |                  |       |
|                 | Num<br>per year | Rate<br>/100,000 | × 100 | Num<br>per year | Rate<br>/100,000 | × 100 | Num<br>per year | Rate<br>/100,000 | × 100 | Num<br>per year | Rate<br>/100,000 | × 100 |
|                 |                 |                  |       |                 |                  |       |                 |                  |       |                 |                  |       |
| Total (>10 y/o) | 45–54           | Total (>10 y/o)  | 45–54 |                 |                  |       |                 |                  |       |                 |                  |       |
| 1983–1987       | 26.2            | 35.7             | 111.8 | 7.6             | 63.6             | 125.8 | 13.8            | 15.4             | 101.8 | 2.4             | 18.5             | 107.6 |
| 1988–1992       | 23.0            | 27.3             | 119.8 | 3.8             | 35.2             | 102.5 | 11.4            | 12.2             | 93.4  | 1.6             | 14.5             | 99.5  |
| 1993–1997       | 19.2            | 24.5             | 97.7  | 3.2             | 30.5             | 83.3  | 11.4            | 11.0             | 102.9 | 1.6             | 13.0             | 100.8 |
| 1998–2002       | 33.6            | 38.5             | 112.8 | 8.8             | 63.4             | 113.3 | 11.2            | 11.4             | 91.1  | 1.6             | 14.1             | 93.5  |
| 2003–2007       | 37.0            | 41.9             | 121.9 | 8.6             | 69.6             | 124.5 | 13.8            | 12.5             | 109.3 | 1.0             | 11.8             | 85.9  |
| 2008–2012       | 33.0            | 37.8             | 116.6 | 7.4             | 63.7             | 131.1 | 12.0            | 12.6             | 100.8 | 1.0             | 12.9             | 86.7  |
|                 | 15–24           |                  |       | 55–64           |                  |       | 15–24           |                  |       | 55–64           |                  |       |
| 1983–1987       | 1.0             | 12.8             | 91.6  | 4.0             | 41.6             | 97.8  | 0.0             | 4.7              | 68.3  | 3.4             | 24.7             | 125.2 |
| 1988–1992       | 0.8             | 9.4              | 94.7  | 7.6             | 57.3             | 161.5 | 0.2             | 4.2              | 79.8  | 2.4             | 18.6             | 104.4 |
| 1993–1997       | 0.8             | 10.2             | 90.1  | 4.4             | 41.1             | 102.0 | 1.2             | 7.3              | 140.7 | 2.4             | 18.1             | 113.6 |
| 1998–2002       | 1.4             | 15.6             | 98.8  | 6.0             | 59.9             | 94.3  | 0.8             | 7.5              | 107.1 | 1.8             | 17.8             | 94.3  |
| 2003–2007       | 2.6             | 22.5             | 128.8 | 8.6             | 66.7             | 115.6 | 0.0             | 5.8              | 64.2  | 2.4             | 17.9             | 106.8 |
| 2008–2012       | 1.2             | 19.5             | 91.9  | 6.6             | 49.5             | 101.9 | 0.6             | 9.1              | 93.8  | 2.2             | 15.7             | 105.2 |
|                 | 25–34           |                  |       | 65–74           |                  |       | 25–34           |                  |       | 65–74           |                  |       |
| 1983–1987       | 4.0             | 31.8             | 124.4 | 2.0             | 38.4             | 87.7  | 1.2             | 10.8             | 100.8 | 1.4             | 22.7             | 72.5  |
| 1988–1992       | 2.4             | 22.5             | 117.6 | 3.4             | 43.3             | 122.8 | 0.4             | 7.1              | 81.5  | 3.0             | 29.8             | 114.1 |
| 1993–1997       | 1.2             | 16.4             | 84.2  | 2.8             | 32.7             | 102.4 | 0.2             | 6.3              | 76.0  | 1.4             | 15.5             | 79.7  |
| 1998–2002       | 3.8             | 31.7             | 117.5 | 3.6             | 40.8             | 89.7  | 0.2             | 8.4              | 72.3  | 1.6             | 16.9             | 80.2  |
| 2003–2007       | 4.0             | 34.4             | 111.0 | 5.0             | 48.7             | 113.5 | 0.6             | 10.4             | 79.6  | 3.0             | 22.5             | 120.7 |
| 2008–2012       | 3.6             | 34.8             | 106.9 | 4.8             | 46.4             | 117.4 | 1.0             | 13.1             | 91.6  | 2.6             | 20.7             | 116.1 |
|                 | 35–44           |                  |       | >74 y/o         |                  |       | 35–44           |                  |       | >74 y/o         |                  |       |
| 1983–1987       | 4.6             | 34.8             | 109.4 | 2.8             | 79.0             | 100.8 | 2.4             | 15.0             | 126.8 | 3.0             | 53.9             | 93.5  |
| 1988–1992       | 3.0             | 23.1             | 97.6  | 2.0             | 53.3             | 82.7  | 1.4             | 10.2             | 105.3 | 2.4             | 35.7             | 74.6  |
| 1993–1997       | 3.6             | 28.5             | 116.3 | 3.0             | 58.5             | 112.4 | 1.2             | 9.3              | 109.4 | 3.2             | 35.0             | 101.8 |
| 1998–2002       | 4.6             | 41.3             | 117.2 | 5.4             | 77.8             | 147.7 | 0.2             | 7.2              | 69.4  | 5.0             | 42.1             | 135.6 |
| 2003–2007       | 4.6             | 44.5             | 111.0 | 3.4             | 45.4             | 100.9 | 1.6             | 13.9             | 109.9 | 5.2             | 34.7             | 154.7 |
| 2008–2012       | 4.8             | 40.9             | 109.8 | 4.6             | 47.3             | 114.0 | 1.4             | 13.5             | 99.9  | 3.2             | 19.9             | 103.6 |

Secondary Medical Zone ID: 239

|           | Male            |                  |       |                 |                  |       | Female          |                  |       |                 |                  |       |
|-----------|-----------------|------------------|-------|-----------------|------------------|-------|-----------------|------------------|-------|-----------------|------------------|-------|
|           | Suicide         |                  |       | Suicide         |                  |       | Suicide         |                  |       | Suicide         |                  |       |
|           | Num<br>per year | Rate<br>/100,000 | × 100 | Num<br>per year | Rate<br>/100,000 | × 100 | Num<br>per year | Rate<br>/100,000 | × 100 | Num<br>per year | Rate<br>/100,000 | × 100 |
|           |                 |                  |       |                 |                  |       |                 |                  |       |                 |                  |       |
|           | Total (>10 y/o) |                  |       | 45–54           |                  |       | Total (>10 y/o) |                  |       | 45–54           |                  |       |
| 1983–1987 | 20.0            | 40.4             | 150.9 | 3.8             | 63.6             | 125.8 | 11.4            | 17.8             | 132.2 | 1.6             | 20.3             | 117.5 |
| 1988–1992 | 16.0            | 30.4             | 152.9 | 2.0             | 39.2             | 114.2 | 13.0            | 15.8             | 158.1 | 1.4             | 17.5             | 119.8 |
| 1993–1997 | 16.4            | 31.2             | 155.8 | 5.0             | 59.6             | 162.8 | 8.8             | 12.4             | 133.8 | 1.0             | 14.6             | 113.0 |
| 1998–2002 | 19.0            | 41.1             | 138.7 | 4.6             | 71.1             | 127.1 | 6.6             | 12.7             | 105.4 | 0.8             | 15.5             | 103.2 |
| 2003–2007 | 18.6            | 42.6             | 145.9 | 4.0             | 74.7             | 133.6 | 5.4             | 12.8             | 102.6 | 1.0             | 15.7             | 114.4 |
| 2008–2012 | 14.4            | 39.0             | 126.1 | 3.8             | 69.0             | 141.9 | 6.4             | 13.1             | 114.9 | 0.6             | 15.4             | 103.4 |
|           | 15–24           |                  |       | 55–64           |                  |       | 15–24           |                  |       | 55–64           |                  |       |
| 1983–1987 | 0.4             | 13.7             | 98.1  | 4.2             | 57.5             | 135.4 | 0.4             | 7.6              | 111.5 | 1.2             | 18.6             | 94.3  |
| 1988–1992 | 0.2             | 9.5              | 95.9  | 2.6             | 40.8             | 114.8 | 0.0             | 4.6              | 87.3  | 2.2             | 22.7             | 127.4 |
| 1993–1997 | 0.6             | 12.5             | 110.4 | 1.2             | 34.5             | 85.7  | 0.4             | 6.2              | 119.5 | 2.0             | 22.0             | 138.5 |
| 1998–2002 | 0.6             | 16.7             | 105.7 | 4.4             | 82.2             | 129.4 | 0.0             | 6.3              | 89.4  | 0.2             | 15.6             | 82.9  |
| 2003–2007 | 0.6             | 18.5             | 106.0 | 5.0             | 80.0             | 138.7 | 0.2             | 9.0              | 100.2 | 0.8             | 16.8             | 100.2 |
| 2008–2012 | 0.4             | 21.3             | 100.4 | 2.4             | 48.0             | 98.8  | 0.0             | 8.6              | 88.7  | 0.8             | 15.3             | 102.5 |
|           | 25–34           |                  |       | 65–74           |                  |       | 25–34           |                  |       | 65–74           |                  |       |
| 1983–1987 | 1.8             | 31.0             | 121.3 | 2.0             | 46.2             | 105.6 | 1.6             | 16.9             | 157.0 | 3.6             | 48.7             | 155.9 |
| 1988–1992 | 1.4             | 25.6             | 134.1 | 2.4             | 43.3             | 123.0 | 0.4             | 9.2              | 105.6 | 3.4             | 42.0             | 161.1 |
| 1993–1997 | 0.8             | 21.5             | 109.9 | 3.0             | 45.9             | 144.0 | 0.4             | 9.0              | 108.5 | 1.4             | 20.3             | 104.2 |
| 1998–2002 | 1.0             | 28.9             | 106.8 | 3.6             | 57.4             | 126.2 | 0.8             | 13.7             | 118.6 | 1.8             | 24.0             | 114.1 |
| 2003–2007 | 1.0             | 32.2             | 103.7 | 2.6             | 50.5             | 117.6 | 0.0             | 11.3             | 86.9  | 1.2             | 19.8             | 106.1 |
| 2008–2012 | 1.4             | 36.6             | 112.3 | 1.6             | 40.7             | 103.2 | 0.0             | 12.7             | 88.6  | 1.8             | 22.8             | 128.1 |
|           | 35–44           |                  |       | >74 y/o         |                  |       | 35–44           |                  |       | >74 y/o         |                  |       |
| 1983–1987 | 3.0             | 43.5             | 136.8 | 4.6             | 134.2            | 171.3 | 0.8             | 12.9             | 109.0 | 2.2             | 57.3             | 99.3  |
| 1988–1992 | 3.0             | 36.8             | 155.4 | 4.4             | 110.3            | 171.1 | 0.4             | 9.5              | 98.4  | 5.2             | 88.3             | 184.5 |
| 1993–1997 | 2.4             | 36.0             | 146.9 | 3.4             | 78.4             | 150.5 | 0.6             | 9.7              | 114.0 | 3.0             | 45.7             | 132.9 |
| 1998–2002 | 1.4             | 37.1             | 105.2 | 3.4             | 70.0             | 132.8 | 0.2             | 9.6              | 92.8  | 2.8             | 36.8             | 118.6 |
| 2003–2007 | 1.4             | 43.4             | 108.3 | 4.0             | 68.0             | 151.0 | 0.4             | 12.8             | 101.7 | 1.8             | 22.0             | 97.9  |
| 2008–2012 | 2.4             | 46.7             | 125.5 | 2.4             | 45.1             | 108.8 | 0.4             | 13.7             | 101.2 | 2.8             | 26.2             | 136.5 |



Secondary Medical Zone ID: 240

|           | Male            |          |       |          |          |       | Female          |          |       |          |          |       |
|-----------|-----------------|----------|-------|----------|----------|-------|-----------------|----------|-------|----------|----------|-------|
|           | Suicide         |          |       | Suicide  |          |       | Suicide         |          |       | Suicide  |          |       |
|           | Num             | Rate     | × 100 | Num      | Rate     | × 100 | Num             | Rate     | × 100 | Num      | Rate     | × 100 |
|           | per year        | /100,000 |       | per year | /100,000 |       | per year        | /100,000 |       | per year | /100,000 |       |
|           | Total (>10 y/o) |          |       | 45–54    |          |       | Total (>10 y/o) |          |       | 45–54    |          |       |
| 1983–1987 | 21.8            | 39.0     | 136.3 | 6.0      | 71.6     | 141.6 | 15.2            | 19.0     | 146.9 | 1.8      | 19.4     | 112.5 |
| 1988–1992 | 17.4            | 29.4     | 138.4 | 4.2      | 49.7     | 144.7 | 11.2            | 14.2     | 125.7 | 1.0      | 14.7     | 100.2 |
| 1993–1997 | 20.0            | 31.1     | 150.7 | 4.6      | 48.5     | 132.7 | 7.8             | 11.2     | 108.4 | 1.6      | 15.7     | 121.3 |
| 1998–2002 | 21.4            | 39.9     | 122.1 | 7.0      | 77.3     | 138.0 | 10.8            | 13.9     | 124.2 | 1.6      | 17.3     | 114.8 |
| 2003–2007 | 24.6            | 43.2     | 142.7 | 4.6      | 66.3     | 118.5 | 8.0             | 12.7     | 109.4 | 0.8      | 13.7     | 100.2 |
| 2008–2012 | 19.0            | 36.9     | 119.6 | 3.0      | 50.6     | 104.1 | 7.0             | 13.4     | 105.1 | 1.0      | 16.2     | 108.6 |
|           | 15–24           |          |       | 55–64    |          |       | 15–24           |          |       | 55–64    |          |       |
| 1983–1987 | 1.0             | 16.1     | 115.3 | 3.2      | 44.9     | 105.8 | 0.2             | 6.4      | 93.3  | 3.2      | 27.6     | 139.7 |
| 1988–1992 | 0.8             | 11.1     | 111.7 | 3.8      | 45.5     | 128.1 | 0.2             | 5.1      | 96.4  | 1.6      | 18.3     | 102.6 |
| 1993–1997 | 0.8             | 12.2     | 107.9 | 4.6      | 55.0     | 136.6 | 0.2             | 5.1      | 96.8  | 1.8      | 18.9     | 118.9 |
| 1998–2002 | 1.8             | 21.1     | 133.7 | 3.0      | 56.6     | 89.1  | 0.4             | 7.4      | 105.3 | 1.8      | 21.1     | 112.1 |
| 2003–2007 | 1.6             | 21.9     | 125.5 | 7.8      | 89.5     | 155.0 | 0.4             | 9.3      | 103.5 | 1.6      | 18.5     | 110.4 |
| 2008–2012 | 1.6             | 26.3     | 124.2 | 4.8      | 56.2     | 115.6 | 0.2             | 9.1      | 94.0  | 1.2      | 15.5     | 104.0 |
|           | 25–34           |          |       | 65–74    |          |       | 25–34           |          |       | 65–74    |          |       |
| 1983–1987 | 1.8             | 26.7     | 104.4 | 2.2      | 47.3     | 108.1 | 1.2             | 13.4     | 124.7 | 4.0      | 50.1     | 160.3 |
| 1988–1992 | 1.8             | 25.0     | 130.9 | 2.6      | 43.9     | 124.7 | 0.6             | 9.3      | 107.5 | 3.0      | 36.0     | 138.1 |
| 1993–1997 | 1.0             | 20.2     | 103.2 | 2.4      | 37.2     | 116.6 | 0.2             | 7.5      | 90.6  | 1.8      | 21.4     | 109.9 |
| 1998–2002 | 1.4             | 27.8     | 103.1 | 3.2      | 49.4     | 108.6 | 0.2             | 10.2     | 88.4  | 3.2      | 30.0     | 142.9 |
| 2003–2007 | 1.6             | 32.3     | 104.1 | 2.6      | 45.1     | 105.2 | 0.8             | 14.1     | 108.7 | 1.2      | 17.9     | 96.3  |
| 2008–2012 | 0.8             | 28.6     | 87.8  | 2.4      | 42.4     | 107.3 | 0.6             | 14.6     | 102.1 | 1.4      | 19.1     | 107.5 |
|           | 35–44           |          |       | >74 y/o  |          |       | 35–44           |          |       | >74 y/o  |          |       |
| 1983–1987 | 3.8             | 41.4     | 130.1 | 3.8      | 119.5    | 152.6 | 0.8             | 11.7     | 99.0  | 4.0      | 88.2     | 152.9 |
| 1988–1992 | 1.8             | 24.1     | 101.5 | 2.2      | 69.1     | 107.1 | 0.4             | 8.7      | 90.4  | 4.4      | 75.0     | 156.8 |
| 1993–1997 | 3.2             | 36.2     | 147.5 | 3.4      | 79.7     | 153.0 | 0.6             | 8.9      | 104.7 | 1.6      | 28.1     | 81.6  |
| 1998–2002 | 2.6             | 40.9     | 116.1 | 2.4      | 56.4     | 107.0 | 0.8             | 11.6     | 111.8 | 2.6      | 33.2     | 106.8 |
| 2003–2007 | 2.2             | 43.0     | 107.3 | 4.2      | 68.1     | 151.3 | 0.0             | 10.1     | 80.0  | 3.2      | 31.2     | 138.9 |
| 2008–2012 | 2.6             | 41.1     | 110.4 | 3.8      | 56.6     | 136.5 | 1.0             | 15.1     | 111.5 | 1.6      | 17.1     | 89.1  |

Secondary Medical Zone ID: 241

|           | Male            |          |       |          |          |       | Female          |          |       |          |          |       |
|-----------|-----------------|----------|-------|----------|----------|-------|-----------------|----------|-------|----------|----------|-------|
|           | Suicide         |          |       | Suicide  |          |       | Suicide         |          |       | Suicide  |          |       |
|           | Num             | Rate     | × 100 | Num      | Rate     | × 100 | Num             | Rate     | × 100 | Num      | Rate     | × 100 |
|           | per year        | /100,000 |       | per year | /100,000 |       | per year        | /100,000 |       | per year | /100,000 |       |
|           | Total (>10 y/o) |          |       | 45–54    |          |       | Total (>10 y/o) |          |       | 45–54    |          |       |
| 1983–1987 | 18.4            | 39.0     | 142.7 | 4.8      | 69.4     | 137.2 | 11.2            | 18.5     | 139.6 | 1.4      | 19.0     | 110.3 |
| 1988–1992 | 14.8            | 28.9     | 145.2 | 1.4      | 32.4     | 94.4  | 7.6             | 13.5     | 113.0 | 1.2      | 16.3     | 111.2 |
| 1993–1997 | 15.4            | 30.2     | 145.9 | 3.8      | 49.0     | 134.0 | 5.8             | 11.0     | 104.7 | 1.2      | 14.9     | 115.2 |
| 1998–2002 | 24.2            | 44.9     | 162.8 | 5.0      | 71.0     | 126.9 | 7.6             | 13.1     | 114.2 | 1.0      | 15.8     | 104.7 |
| 2003–2007 | 19.8            | 43.5     | 146.9 | 3.8      | 68.3     | 122.1 | 6.2             | 13.0     | 108.0 | 0.8      | 14.3     | 104.7 |
| 2008–2012 | 11.0            | 33.9     | 101.8 | 2.2      | 51.9     | 106.8 | 5.8             | 13.4     | 107.3 | 0.6      | 15.0     | 100.3 |
|           | 15–24           |          |       | 55–64    |          |       | 15–24           |          |       | 55–64    |          |       |
| 1983–1987 | 0.6             | 14.7     | 105.6 | 4.6      | 63.2     | 148.8 | 0.2             | 6.7      | 98.1  | 2.4      | 26.3     | 133.5 |
| 1988–1992 | 0.6             | 11.0     | 110.7 | 3.8      | 50.5     | 142.4 | 0.0             | 4.5      | 86.0  | 1.2      | 18.2     | 101.7 |
| 1993–1997 | 0.6             | 12.1     | 107.3 | 4.2      | 57.5     | 142.7 | 0.2             | 5.3      | 101.2 | 1.0      | 16.3     | 102.3 |
| 1998–2002 | 0.6             | 16.2     | 102.7 | 4.4      | 78.4     | 123.4 | 0.4             | 7.7      | 109.9 | 1.0      | 18.7     | 99.6  |
| 2003–2007 | 0.8             | 19.3     | 110.6 | 5.4      | 80.5     | 139.4 | 0.0             | 7.7      | 85.2  | 1.0      | 17.0     | 101.7 |
| 2008–2012 | 0.0             | 18.1     | 85.4  | 2.2      | 45.2     | 93.0  | 0.4             | 10.9     | 112.6 | 1.4      | 17.1     | 114.4 |
|           | 25–34           |          |       | 65–74    |          |       | 25–34           |          |       | 65–74    |          |       |
| 1983–1987 | 2.2             | 32.5     | 127.1 | 2.2      | 53.7     | 122.6 | 1.2             | 14.2     | 131.8 | 1.6      | 33.8     | 108.1 |
| 1988–1992 | 1.2             | 23.0     | 120.6 | 2.2      | 45.1     | 127.9 | 0.2             | 8.0      | 92.2  | 1.8      | 30.6     | 117.4 |
| 1993–1997 | 1.2             | 23.7     | 121.1 | 1.6      | 33.5     | 105.1 | 0.0             | 7.1      | 85.2  | 1.8      | 24.6     | 126.1 |
| 1998–2002 | 2.6             | 38.6     | 142.8 | 3.2      | 53.9     | 118.4 | 0.0             | 9.9      | 85.7  | 2.2      | 27.1     | 128.9 |
| 2003–2007 | 2.4             | 42.0     | 135.3 | 2.6      | 49.1     | 114.4 | 1.2             | 16.8     | 129.1 | 0.8      | 17.2     | 92.4  |
| 2008–2012 | 0.8             | 31.7     | 97.4  | 1.4      | 38.0     | 96.3  | 0.4             | 14.4     | 100.4 | 0.6      | 16.3     | 91.6  |
|           | 35–44           |          |       | >74 y/o  |          |       | 35–44           |          |       | >74 y/o  |          |       |
| 1983–1987 | 2.0             | 33.5     | 105.3 | 2.0      | 87.8     | 112.1 | 0.8             | 12.3     | 104.3 | 3.6      | 99.5     | 172.4 |
| 1988–1992 | 1.4             | 23.9     | 101.0 | 4.0      | 113.4    | 175.8 | 0.2             | 8.4      | 87.5  | 3.0      | 65.6     | 137.0 |
| 1993–1997 | 1.6             | 27.5     | 112.3 | 2.4      | 69.7     | 133.8 | 0.4             | 8.5      | 99.5  | 1.2      | 27.9     | 81.1  |
| 1998–2002 | 3.2             | 52.3     | 148.4 | 5.0      | 103.4    | 196.1 | 0.4             | 10.2     | 98.9  | 2.6      | 39.4     | 126.8 |
| 2003–2007 | 2.0             | 48.3     | 120.5 | 2.8      | 57.9     | 128.5 | 0.2             | 11.6     | 91.6  | 2.2      | 28.0     | 124.7 |
| 2008–2012 | 1.0             | 35.7     | 95.9  | 3.4      | 57.2     | 137.8 | 0.6             | 14.3     | 105.2 | 1.8      | 21.1     | 109.5 |

Secondary Medical Zone ID: 242

|           | Male            |          |       |          |          |       | Female          |          |       |          |          |       |
|-----------|-----------------|----------|-------|----------|----------|-------|-----------------|----------|-------|----------|----------|-------|
|           | Suicide         |          |       | Suicide  |          |       | Suicide         |          |       | Suicide  |          |       |
|           | Num             | Rate     | × 100 | Num      | Rate     | × 100 | Num             | Rate     | × 100 | Num      | Rate     | × 100 |
|           | per year        | /100,000 |       | per year | /100,000 |       | per year        | /100,000 |       | per year | /100,000 |       |
|           | Total (>10 y/o) |          |       | 45–54    |          |       | Total (>10 y/o) |          |       | 45–54    |          |       |
| 1983–1987 | 6.8             | 35.7     | 131.3 | 0.8      | 48.9     | 96.7  | 2.4             | 15.2     | 96.0  | 0.2      | 16.4     | 95.1  |
| 1988–1992 | 6.0             | 27.5     | 139.5 | 1.6      | 46.7     | 135.8 | 2.2             | 12.5     | 96.7  | 0.0      | 13.4     | 91.9  |
| 1993–1997 | 5.4             | 27.3     | 128.2 | 2.4      | 51.5     | 140.8 | 2.0             | 10.6     | 100.4 | 0.2      | 12.8     | 99.0  |
| 1998–2002 | 6.4             | 37.3     | 117.5 | 0.4      | 46.6     | 83.3  | 2.0             | 12.5     | 98.1  | 0.4      | 15.6     | 103.9 |
| 2003–2007 | 6.2             | 38.9     | 121.0 | 1.6      | 65.8     | 117.6 | 2.0             | 12.8     | 102.0 | 0.2      | 13.6     | 99.4  |
| 2008–2012 | 3.6             | 34.2     | 98.4  | 0.2      | 43.2     | 89.0  | 0.8             | 12.4     | 91.0  | 0.0      | 13.9     | 93.2  |
| -----     |                 |          |       |          |          |       |                 |          |       |          |          |       |
|           | 15–24           |          |       | 55–64    |          |       | 15–24           |          |       | 55–64    |          |       |
| 1983–1987 | 0.6             | 18.1     | 129.7 | 1.8      | 55.1     | 129.7 | 0.0             | 6.5      | 95.8  | 0.2      | 17.8     | 90.4  |
| 1988–1992 | 0.8             | 13.1     | 132.7 | 0.6      | 34.4     | 97.0  | 0.2             | 5.9      | 112.6 | 0.4      | 17.8     | 100.0 |
| 1993–1997 | 0.0             | 10.8     | 95.1  | 1.2      | 45.9     | 114.0 | 0.0             | 5.0      | 95.9  | 0.0      | 13.7     | 86.3  |
| 1998–2002 | 0.2             | 16.0     | 101.5 | 2.0      | 77.0     | 121.1 | 0.2             | 7.6      | 108.8 | 0.0      | 17.1     | 90.7  |
| 2003–2007 | 0.4             | 19.0     | 109.0 | 1.2      | 58.8     | 101.8 | 0.0             | 8.6      | 95.2  | 0.4      | 17.2     | 102.7 |
| 2008–2012 | 0.4             | 23.2     | 109.2 | 1.4      | 51.7     | 106.5 | 0.0             | 9.3      | 96.0  | 0.4      | 15.4     | 103.4 |
| -----     |                 |          |       |          |          |       |                 |          |       |          |          |       |
|           | 25–34           |          |       | 65–74    |          |       | 25–34           |          |       | 65–74    |          |       |
| 1983–1987 | 1.0             | 31.1     | 121.6 | 0.6      | 44.1     | 100.6 | 0.0             | 9.7      | 90.1  | 0.6      | 31.5     | 100.7 |
| 1988–1992 | 0.2             | 18.7     | 97.6  | 1.0      | 42.7     | 121.3 | 0.2             | 9.1      | 105.5 | 0.4      | 24.2     | 92.7  |
| 1993–1997 | 0.2             | 19.5     | 99.9  | 0.6      | 33.2     | 104.1 | 0.0             | 7.9      | 95.2  | 0.4      | 19.2     | 98.5  |
| 1998–2002 | 0.4             | 28.0     | 103.5 | 1.0      | 48.3     | 106.2 | 0.0             | 11.1     | 95.4  | 0.4      | 20.6     | 97.9  |
| 2003–2007 | 0.6             | 33.6     | 108.3 | 1.0      | 47.4     | 110.5 | 0.2             | 13.4     | 103.2 | 0.2      | 17.5     | 93.9  |
| 2008–2012 | 0.2             | 31.7     | 97.4  | 0.2      | 35.6     | 90.1  | 0.0             | 13.7     | 95.4  | 0.2      | 17.3     | 96.9  |
| -----     |                 |          |       |          |          |       |                 |          |       |          |          |       |
|           | 35–44           |          |       | >74 y/o  |          |       | 35–44           |          |       | >74 y/o  |          |       |
| 1983–1987 | 1.0             | 35.6     | 111.9 | 1.0      | 89.2     | 113.9 | 0.0             | 10.8     | 91.3  | 1.4      | 76.6     | 132.7 |
| 1988–1992 | 0.6             | 24.7     | 104.2 | 1.2      | 80.9     | 125.4 | 0.4             | 10.6     | 109.7 | 0.6      | 41.0     | 85.7  |
| 1993–1997 | 0.4             | 24.1     | 98.3  | 0.6      | 52.2     | 100.2 | 0.2             | 8.8      | 103.9 | 1.2      | 44.7     | 130.0 |
| 1998–2002 | 0.8             | 38.9     | 110.4 | 1.6      | 73.3     | 139.1 | 0.0             | 9.6      | 93.0  | 1.0      | 35.1     | 113.2 |
| 2003–2007 | 0.6             | 42.5     | 106.2 | 0.8      | 47.5     | 105.6 | 0.2             | 13.0     | 103.0 | 0.6      | 21.9     | 97.5  |
| 2008–2012 | 0.6             | 39.1     | 105.0 | 0.6      | 40.5     | 97.6  | 0.0             | 13.0     | 95.7  | 0.2      | 15.4     | 80.2  |

Secondary Medical Zone ID: 243

|           | Male            |          |       |          |          |       | Female          |          |       |          |          |       |
|-----------|-----------------|----------|-------|----------|----------|-------|-----------------|----------|-------|----------|----------|-------|
|           | Suicide         |          |       | Suicide  |          |       | Suicide         |          |       | Suicide  |          |       |
|           | Num             | Rate     | × 100 | Num      | Rate     | × 100 | Num             | Rate     | × 100 | Num      | Rate     | × 100 |
|           | per year        | /100,000 |       | per year | /100,000 |       | per year        | /100,000 |       | per year | /100,000 |       |
|           | Total (>10 y/o) |          |       | 45–54    |          |       | Total (>10 y/o) |          |       | 45–54    |          |       |
| 1983–1987 | 105.2           | 30.7     | 94.4  | 26.0     | 49.1     | 97.2  | 50.6            | 13.0     | 82.4  | 9.8      | 17.4     | 101.1 |
| 1988–1992 | 82.2            | 22.5     | 90.0  | 19.6     | 34.0     | 99.0  | 47.8            | 11.0     | 82.4  | 7.0      | 12.3     | 84.5  |
| 1993–1997 | 80.4            | 20.9     | 81.0  | 23.8     | 35.7     | 97.6  | 42.2            | 9.4      | 80.6  | 6.4      | 10.1     | 78.4  |
| 1998–2002 | 123.6           | 30.7     | 83.4  | 31.6     | 49.5     | 88.4  | 53.8            | 11.6     | 85.5  | 10.4     | 15.5     | 103.2 |
| 2003–2007 | 129.0           | 31.3     | 84.6  | 25.2     | 45.6     | 81.6  | 42.8            | 9.7      | 71.4  | 4.6      | 9.3      | 68.1  |
| 2008–2012 | 129.4           | 33.1     | 90.8  | 26.0     | 50.0     | 102.8 | 50.6            | 11.1     | 83.4  | 6.8      | 13.1     | 87.9  |
|           | 15–24           |          |       | 55–64    |          |       | 15–24           |          |       | 55–64    |          |       |
| 1983–1987 | 7.6             | 13.7     | 98.2  | 16.4     | 39.6     | 93.2  | 4.4             | 7.6      | 111.1 | 7.8      | 16.8     | 85.2  |
| 1988–1992 | 6.6             | 10.2     | 103.2 | 14.6     | 30.2     | 85.1  | 2.8             | 4.6      | 87.3  | 8.2      | 15.7     | 88.0  |
| 1993–1997 | 8.4             | 12.3     | 109.1 | 13.8     | 28.5     | 70.8  | 3.0             | 4.8      | 91.9  | 7.2      | 13.4     | 84.3  |
| 1998–2002 | 7.0             | 12.6     | 79.7  | 31.2     | 57.0     | 89.7  | 3.0             | 5.7      | 81.8  | 11.0     | 18.5     | 98.3  |
| 2003–2007 | 8.4             | 16.2     | 93.1  | 32.2     | 50.9     | 88.2  | 2.4             | 5.6      | 62.6  | 8.0      | 12.9     | 77.0  |
| 2008–2012 | 11.0            | 23.0     | 108.6 | 26.4     | 42.6     | 87.7  | 4.2             | 9.2      | 94.9  | 8.4      | 13.2     | 88.3  |
|           | 25–34           |          |       | 65–74    |          |       | 25–34           |          |       | 65–74    |          |       |
| 1983–1987 | 11.0            | 20.9     | 81.7  | 8.4      | 35.4     | 80.9  | 5.6             | 10.0     | 93.0  | 6.2      | 19.9     | 63.8  |
| 1988–1992 | 10.0            | 19.3     | 100.8 | 7.2      | 26.8     | 76.0  | 5.8             | 10.1     | 116.8 | 6.6      | 17.9     | 68.6  |
| 1993–1997 | 9.0             | 17.2     | 88.1  | 10.0     | 27.9     | 87.5  | 4.8             | 8.4      | 100.9 | 9.2      | 19.9     | 102.1 |
| 1998–2002 | 13.6            | 23.4     | 86.6  | 15.0     | 36.2     | 79.6  | 7.6             | 12.0     | 103.5 | 9.6      | 19.0     | 90.4  |
| 2003–2007 | 16.0            | 26.9     | 86.6  | 16.0     | 35.9     | 83.6  | 6.6             | 11.1     | 85.7  | 7.4      | 14.6     | 78.6  |
| 2008–2012 | 16.8            | 31.4     | 96.5  | 12.6     | 27.4     | 69.4  | 5.0             | 10.4     | 72.8  | 9.0      | 16.3     | 91.5  |
|           | 35–44           |          |       | >74 y/o  |          |       | 35–44           |          |       | >74 y/o  |          |       |
| 1983–1987 | 23.8            | 34.5     | 108.3 | 11.2     | 72.7     | 92.8  | 6.4             | 9.7      | 81.9  | 9.8      | 41.8     | 72.4  |
| 1988–1992 | 14.4            | 22.1     | 93.4  | 9.8      | 52.7     | 81.7  | 6.8             | 10.0     | 104.0 | 10.2     | 32.9     | 68.7  |
| 1993–1997 | 9.8             | 18.0     | 73.3  | 5.4      | 28.4     | 54.5  | 4.6             | 8.0      | 94.6  | 6.4      | 17.7     | 51.4  |
| 1998–2002 | 15.6            | 30.1     | 85.4  | 9.2      | 38.3     | 72.6  | 5.8             | 10.5     | 101.5 | 6.4      | 14.8     | 47.6  |
| 2003–2007 | 17.6            | 32.8     | 81.9  | 13.4     | 41.2     | 91.6  | 5.8             | 10.7     | 85.0  | 8.0      | 14.5     | 64.8  |
| 2008–2012 | 24.6            | 39.1     | 105.1 | 12.0     | 31.6     | 76.2  | 7.6             | 12.4     | 91.1  | 9.6      | 14.7     | 76.5  |

Secondary Medical Zone ID: 244

|           | Male            |          |       |          |          |       | Female          |          |       |          |          |       |
|-----------|-----------------|----------|-------|----------|----------|-------|-----------------|----------|-------|----------|----------|-------|
|           | Suicide         |          |       | Suicide  |          |       | Suicide         |          |       | Suicide  |          |       |
|           | Num             | Rate     | × 100 | Num      | Rate     | × 100 | Num             | Rate     | × 100 | Num      | Rate     | × 100 |
|           | per year        | /100,000 |       | per year | /100,000 |       | per year        | /100,000 |       | per year | /100,000 |       |
|           | Total (>10 y/o) |          |       | 45–54    |          |       | Total (>10 y/o) |          |       | 45–54    |          |       |
| 1983–1987 | 79.6            | 29.4     | 88.0  | 21.4     | 47.4     | 93.7  | 36.4            | 12.4     | 74.8  | 6.6      | 15.2     | 88.4  |
| 1988–1992 | 63.4            | 22.0     | 86.5  | 16.6     | 33.7     | 98.2  | 35.4            | 10.5     | 77.1  | 6.4      | 13.4     | 91.8  |
| 1993–1997 | 70.0            | 23.0     | 87.7  | 19.4     | 35.5     | 96.9  | 34.2            | 9.3      | 82.3  | 6.8      | 12.4     | 95.9  |
| 1998–2002 | 95.2            | 30.3     | 80.5  | 26.2     | 50.8     | 90.7  | 36.8            | 10.5     | 75.5  | 7.0      | 13.7     | 90.8  |
| 2003–2007 | 101.6           | 32.9     | 84.7  | 21.8     | 50.1     | 89.6  | 37.0            | 10.8     | 79.0  | 5.8      | 13.2     | 96.1  |
| 2008–2012 | 94.2            | 31.5     | 85.5  | 15.8     | 41.8     | 86.0  | 39.0            | 11.2     | 84.0  | 5.8      | 14.6     | 97.7  |
| -----     |                 |          |       |          |          |       |                 |          |       |          |          |       |
|           | 15–24           |          |       | 55–64    |          |       | 15–24           |          |       | 55–64    |          |       |
| 1983–1987 | 7.2             | 16.9     | 121.5 | 11.4     | 35.9     | 84.5  | 3.0             | 6.7      | 98.4  | 4.8      | 14.4     | 73.1  |
| 1988–1992 | 5.2             | 10.8     | 109.3 | 11.6     | 29.9     | 84.2  | 1.8             | 4.0      | 76.4  | 6.0      | 15.2     | 84.9  |
| 1993–1997 | 4.4             | 9.9      | 87.8  | 12.2     | 30.0     | 74.6  | 2.0             | 4.3      | 82.8  | 7.4      | 16.5     | 103.7 |
| 1998–2002 | 4.6             | 12.3     | 78.2  | 23.4     | 51.3     | 80.7  | 1.6             | 4.7      | 67.2  | 6.0      | 14.0     | 74.6  |
| 2003–2007 | 8.4             | 21.3     | 122.3 | 22.4     | 44.1     | 76.5  | 3.6             | 9.2      | 102.6 | 7.4      | 14.4     | 85.7  |
| 2008–2012 | 7.6             | 22.5     | 106.0 | 21.0     | 42.5     | 87.6  | 2.8             | 8.6      | 88.4  | 7.0      | 13.7     | 91.8  |
| -----     |                 |          |       |          |          |       |                 |          |       |          |          |       |
|           | 25–34           |          |       | 65–74    |          |       | 25–34           |          |       | 65–74    |          |       |
| 1983–1987 | 11.4            | 25.9     | 101.3 | 3.8      | 23.7     | 54.1  | 5.6             | 12.2     | 113.0 | 4.8      | 19.6     | 62.7  |
| 1988–1992 | 7.8             | 19.6     | 102.6 | 4.4      | 22.6     | 64.0  | 2.6             | 7.1      | 81.5  | 6.2      | 20.9     | 80.1  |
| 1993–1997 | 8.4             | 20.0     | 102.6 | 6.0      | 22.6     | 70.9  | 3.2             | 7.7      | 93.0  | 4.8      | 14.5     | 74.4  |
| 1998–2002 | 10.0            | 22.5     | 83.2  | 11.6     | 35.2     | 77.5  | 5.8             | 12.0     | 103.3 | 5.0      | 14.1     | 67.3  |
| 2003–2007 | 12.2            | 27.0     | 87.0  | 12.4     | 33.8     | 78.9  | 4.0             | 9.8      | 75.1  | 5.2      | 13.7     | 73.3  |
| 2008–2012 | 13.6            | 34.0     | 104.2 | 9.4      | 25.3     | 64.0  | 4.0             | 11.4     | 79.7  | 7.0      | 15.9     | 89.4  |
| -----     |                 |          |       |          |          |       |                 |          |       |          |          |       |
|           | 35–44           |          |       | >74 y/o  |          |       | 35–44           |          |       | >74 y/o  |          |       |
| 1983–1987 | 13.2            | 24.0     | 75.4  | 10.2     | 79.8     | 101.9 | 5.6             | 10.2     | 86.6  | 6.0      | 32.3     | 56.0  |
| 1988–1992 | 10.8            | 20.7     | 87.5  | 6.8      | 46.4     | 71.9  | 4.2             | 8.4      | 86.7  | 8.2      | 32.3     | 67.4  |
| 1993–1997 | 12.4            | 27.1     | 110.6 | 6.8      | 41.2     | 79.1  | 2.2             | 5.9      | 69.1  | 7.8      | 25.4     | 73.8  |
| 1998–2002 | 12.6            | 31.6     | 89.7  | 6.4      | 34.5     | 65.4  | 3.8             | 9.5      | 92.2  | 7.4      | 20.4     | 65.9  |
| 2003–2007 | 16.4            | 39.0     | 97.4  | 7.4      | 30.7     | 68.3  | 4.2             | 10.7     | 84.9  | 6.8      | 15.6     | 69.7  |
| 2008–2012 | 16.8            | 35.5     | 95.4  | 9.8      | 32.1     | 77.3  | 4.8             | 11.1     | 81.7  | 7.6      | 14.9     | 77.6  |

Secondary Medical Zone ID: 245

|           | Male            |          |       |          |          |       | Female          |          |       |          |          |       |
|-----------|-----------------|----------|-------|----------|----------|-------|-----------------|----------|-------|----------|----------|-------|
|           | Suicide         |          |       | Suicide  |          |       | Suicide         |          |       | Suicide  |          |       |
|           | Num             | Rate     | × 100 | Num      | Rate     | × 100 | Num             | Rate     | × 100 | Num      | Rate     | × 100 |
|           | per year        | /100,000 |       | per year | /100,000 |       | per year        | /100,000 |       | per year | /100,000 |       |
|           | Total (>10 y/o) |          |       | 45–54    |          |       | Total (>10 y/o) |          |       | 45–54    |          |       |
| 1983–1987 | 12.4            | 31.7     | 94.5  | 2.4      | 44.3     | 87.7  | 12.0            | 17.9     | 132.0 | 1.0      | 16.4     | 95.3  |
| 1988–1992 | 6.4             | 21.0     | 71.6  | 1.6      | 33.1     | 96.3  | 8.4             | 13.4     | 110.6 | 0.8      | 14.5     | 99.3  |
| 1993–1997 | 11.2            | 26.5     | 106.4 | 1.0      | 30.4     | 83.0  | 5.2             | 10.4     | 91.9  | 0.6      | 12.6     | 97.6  |
| 1998–2002 | 15.0            | 37.1     | 104.8 | 3.4      | 58.4     | 104.4 | 7.2             | 12.7     | 105.4 | 0.6      | 14.4     | 95.6  |
| 2003–2007 | 13.0            | 37.0     | 99.0  | 2.2      | 49.9     | 89.2  | 4.4             | 11.8     | 88.9  | 0.0      | 11.0     | 80.2  |
| 2008–2012 | 14.2            | 36.5     | 115.1 | 2.2      | 51.0     | 104.8 | 5.4             | 13.2     | 102.2 | 0.8      | 16.0     | 107.4 |
| -----     |                 |          |       |          |          |       |                 |          |       |          |          |       |
|           | 15–24           |          |       | 55–64    |          |       | 15–24           |          |       | 55–64    |          |       |
| 1983–1987 | 0.6             | 14.2     | 101.5 | 2.6      | 41.0     | 96.5  | 0.2             | 6.4      | 94.0  | 2.0      | 22.4     | 113.7 |
| 1988–1992 | 0.4             | 9.7      | 98.3  | 2.0      | 32.5     | 91.4  | 0.2             | 5.1      | 96.4  | 2.0      | 21.1     | 117.9 |
| 1993–1997 | 1.0             | 13.1     | 116.0 | 1.6      | 34.9     | 86.6  | 0.0             | 4.3      | 82.0  | 1.8      | 19.9     | 125.4 |
| 1998–2002 | 0.6             | 15.0     | 94.8  | 3.0      | 62.9     | 99.0  | 0.0             | 5.8      | 82.0  | 1.6      | 21.3     | 113.4 |
| 2003–2007 | 1.4             | 20.6     | 118.1 | 2.8      | 56.9     | 98.5  | 0.0             | 7.0      | 77.6  | 0.6      | 15.7     | 93.6  |
| 2008–2012 | 1.0             | 23.1     | 108.9 | 3.6      | 55.0     | 113.2 | 0.2             | 9.0      | 93.2  | 0.6      | 14.3     | 95.9  |
| -----     |                 |          |       |          |          |       |                 |          |       |          |          |       |
|           | 25–34           |          |       | 65–74    |          |       | 25–34           |          |       | 65–74    |          |       |
| 1983–1987 | 1.0             | 23.6     | 92.1  | 1.6      | 41.4     | 94.5  | 1.0             | 13.2     | 123.1 | 1.8      | 32.3     | 103.3 |
| 1988–1992 | 0.0             | 12.7     | 66.6  | 0.8      | 26.5     | 75.2  | 0.4             | 8.9      | 102.6 | 1.4      | 24.4     | 93.4  |
| 1993–1997 | 1.2             | 23.3     | 119.5 | 1.6      | 30.1     | 94.4  | 0.2             | 8.0      | 95.9  | 1.2      | 18.5     | 94.7  |
| 1998–2002 | 1.2             | 29.1     | 107.8 | 2.6      | 45.1     | 99.1  | 0.0             | 10.0     | 86.7  | 0.8      | 16.9     | 80.7  |
| 2003–2007 | 1.2             | 32.7     | 105.3 | 2.0      | 41.5     | 96.8  | 0.4             | 13.1     | 100.8 | 0.6      | 15.5     | 83.4  |
| 2008–2012 | 1.0             | 33.1     | 101.7 | 1.8      | 40.7     | 103.1 | 0.4             | 14.6     | 101.6 | 1.2      | 19.1     | 107.5 |
| -----     |                 |          |       |          |          |       |                 |          |       |          |          |       |
|           | 35–44           |          |       | >74 y/o  |          |       | 35–44           |          |       | >74 y/o  |          |       |
| 1983–1987 | 1.8             | 32.6     | 102.4 | 2.4      | 84.8     | 108.2 | 1.0             | 13.3     | 112.7 | 5.0      | 109.7    | 190.2 |
| 1988–1992 | 0.6             | 18.6     | 78.5  | 1.0      | 45.3     | 70.3  | 0.6             | 10.0     | 103.7 | 3.0      | 57.3     | 119.8 |
| 1993–1997 | 2.8             | 37.3     | 152.3 | 2.0      | 55.2     | 106.1 | 0.2             | 7.6      | 89.7  | 1.2      | 24.6     | 71.5  |
| 1998–2002 | 2.2             | 42.4     | 120.5 | 1.8      | 47.3     | 89.7  | 1.0             | 13.2     | 127.5 | 3.2      | 40.8     | 131.4 |
| 2003–2007 | 2.0             | 48.0     | 119.9 | 1.4      | 35.3     | 78.4  | 0.6             | 13.5     | 107.1 | 2.2      | 25.1     | 111.8 |
| 2008–2012 | 1.8             | 41.6     | 111.9 | 2.8      | 46.1     | 111.1 | 0.6             | 14.4     | 106.1 | 1.6      | 18.2     | 94.4  |

Secondary Medical Zone ID: 246

|           | Male            |          |       |          |          |       | Female          |          |       |          |          |       |
|-----------|-----------------|----------|-------|----------|----------|-------|-----------------|----------|-------|----------|----------|-------|
|           | Suicide         |          |       | Suicide  |          |       | Suicide         |          |       | Suicide  |          |       |
|           | Num             | Rate     | × 100 | Num      | Rate     | × 100 | Num             | Rate     | × 100 | Num      | Rate     | × 100 |
|           | per year        | /100,000 |       | per year | /100,000 |       | per year        | /100,000 |       | per year | /100,000 |       |
|           | Total (>10 y/o) |          |       | 45–54    |          |       | Total (>10 y/o) |          |       | 45–54    |          |       |
| 1983–1987 | 11.2            | 35.5     | 116.3 | 3.2      | 62.8     | 124.2 | 5.6             | 15.2     | 101.1 | 0.8      | 17.3     | 100.6 |
| 1988–1992 | 10.2            | 27.4     | 128.1 | 1.8      | 39.9     | 116.2 | 6.6             | 13.7     | 118.9 | 1.2      | 17.3     | 118.5 |
| 1993–1997 | 6.6             | 24.5     | 95.6  | 1.4      | 36.5     | 99.7  | 4.8             | 11.1     | 108.0 | 1.0      | 15.1     | 117.1 |
| 1998–2002 | 13.4            | 39.0     | 123.0 | 4.0      | 71.4     | 127.5 | 4.0             | 12.1     | 94.0  | 0.4      | 14.2     | 94.5  |
| 2003–2007 | 11.0            | 36.3     | 111.9 | 1.6      | 50.2     | 89.7  | 4.2             | 12.9     | 101.8 | 0.6      | 14.2     | 103.7 |
| 2008–2012 | 11.4            | 37.6     | 120.4 | 2.2      | 56.2     | 115.6 | 1.4             | 12.0     | 79.9  | 0.4      | 14.7     | 98.6  |
| -----     |                 |          |       |          |          |       |                 |          |       |          |          |       |
|           | 15–24           |          |       | 55–64    |          |       | 15–24           |          |       | 55–64    |          |       |
| 1983–1987 | 1.0             | 19.0     | 136.3 | 1.8      | 42.3     | 99.6  | 0.2             | 7.0      | 101.8 | 0.8      | 18.5     | 94.0  |
| 1988–1992 | 0.0             | 8.8      | 88.7  | 3.0      | 48.2     | 135.8 | 0.0             | 4.7      | 89.5  | 1.6      | 21.7     | 121.4 |
| 1993–1997 | 0.0             | 9.9      | 88.0  | 1.6      | 40.4     | 100.3 | 0.0             | 4.7      | 89.5  | 1.0      | 17.7     | 111.2 |
| 1998–2002 | 0.4             | 15.8     | 100.2 | 2.6      | 68.4     | 107.7 | 0.0             | 6.3      | 90.0  | 0.6      | 18.2     | 96.8  |
| 2003–2007 | 0.2             | 16.5     | 94.5  | 2.6      | 62.3     | 107.8 | 0.8             | 12.6     | 140.6 | 1.0      | 18.3     | 109.2 |
| 2008–2012 | 1.2             | 27.0     | 127.2 | 1.8      | 47.0     | 96.8  | 0.0             | 8.7      | 89.4  | 0.2      | 13.3     | 89.5  |
| -----     |                 |          |       |          |          |       |                 |          |       |          |          |       |
|           | 25–34           |          |       | 65–74    |          |       | 25–34           |          |       | 65–74    |          |       |
| 1983–1987 | 1.6             | 31.3     | 122.3 | 0.6      | 35.6     | 81.3  | 0.2             | 9.8      | 90.9  | 1.8      | 38.7     | 124.0 |
| 1988–1992 | 1.0             | 23.0     | 120.5 | 1.4      | 39.4     | 111.8 | 0.2             | 8.4      | 97.2  | 1.4      | 29.6     | 113.4 |
| 1993–1997 | 0.2             | 17.3     | 88.6  | 1.2      | 32.0     | 100.2 | 0.4             | 9.2      | 110.5 | 0.8      | 18.5     | 94.7  |
| 1998–2002 | 0.4             | 25.1     | 93.0  | 2.0      | 47.1     | 103.7 | 0.0             | 10.4     | 89.3  | 0.8      | 19.6     | 93.2  |
| 2003–2007 | 1.4             | 36.2     | 116.7 | 2.2      | 50.2     | 116.9 | 0.2             | 12.5     | 96.1  | 0.2      | 14.9     | 80.2  |
| 2008–2012 | 1.4             | 37.1     | 113.8 | 2.6      | 52.2     | 132.1 | 0.0             | 12.8     | 89.2  | 0.2      | 15.5     | 87.0  |
| -----     |                 |          |       |          |          |       |                 |          |       |          |          |       |
|           | 35–44           |          |       | >74 y/o  |          |       | 35–44           |          |       | >74 y/o  |          |       |
| 1983–1987 | 2.2             | 40.3     | 126.5 | 0.8      | 60.8     | 77.6  | 0.6             | 12.5     | 105.6 | 1.2      | 49.4     | 85.7  |
| 1988–1992 | 1.0             | 23.7     | 100.0 | 2.0      | 78.3     | 121.4 | 0.6             | 10.5     | 108.8 | 1.6      | 47.4     | 99.1  |
| 1993–1997 | 0.8             | 23.6     | 96.2  | 1.4      | 56.2     | 107.9 | 0.2             | 8.0      | 94.1  | 1.4      | 34.7     | 100.8 |
| 1998–2002 | 1.6             | 40.7     | 115.5 | 2.4      | 69.1     | 131.1 | 0.4             | 10.8     | 104.4 | 1.8      | 34.6     | 111.6 |
| 2003–2007 | 0.2             | 29.4     | 73.5  | 2.8      | 63.4     | 140.7 | 0.2             | 12.1     | 95.6  | 1.2      | 21.5     | 95.6  |
| 2008–2012 | 1.4             | 40.6     | 109.1 | 0.8      | 32.8     | 79.2  | 0.4             | 13.9     | 102.5 | 0.2      | 11.5     | 59.7  |

Secondary Medical Zone ID: 247

|           | Male            |          |       |          |          |       | Female          |          |       |          |          |       |
|-----------|-----------------|----------|-------|----------|----------|-------|-----------------|----------|-------|----------|----------|-------|
|           | Suicide         |          |       | Suicide  |          |       | Suicide         |          |       | Suicide  |          |       |
|           | Num             | Rate     | × 100 | Num      | Rate     | × 100 | Num             | Rate     | × 100 | Num      | Rate     | × 100 |
|           | per year        | /100,000 |       | per year | /100,000 |       | per year        | /100,000 |       | per year | /100,000 |       |
|           | Total (>10 y/o) |          |       | 45–54    |          |       | Total (>10 y/o) |          |       | 45–54    |          |       |
| 1983–1987 | 36.0            | 37.3     | 118.0 | 8.0      | 56.7     | 112.1 | 17.6            | 15.0     | 97.2  | 5.0      | 25.6     | 148.5 |
| 1988–1992 | 25.4            | 25.9     | 105.7 | 5.2      | 38.8     | 112.9 | 15.8            | 12.4     | 95.8  | 2.4      | 16.0     | 109.3 |
| 1993–1997 | 26.4            | 26.7     | 106.5 | 6.2      | 40.8     | 111.6 | 13.2            | 10.4     | 94.4  | 1.6      | 12.3     | 95.4  |
| 1998–2002 | 42.8            | 40.4     | 119.6 | 10.8     | 67.8     | 121.1 | 15.6            | 12.5     | 98.5  | 4.2      | 21.2     | 140.7 |
| 2003–2007 | 37.0            | 39.0     | 107.9 | 9.4      | 69.1     | 123.5 | 14.8            | 12.5     | 101.8 | 1.6      | 13.2     | 96.5  |
| 2008–2012 | 31.0            | 35.1     | 101.6 | 5.8      | 51.5     | 105.9 | 9.8             | 11.3     | 82.3  | 1.0      | 12.5     | 84.0  |
| -----     |                 |          |       |          |          |       |                 |          |       |          |          |       |
|           | 15–24           |          |       | 55–64    |          |       | 15–24           |          |       | 55–64    |          |       |
| 1983–1987 | 2.8             | 20.7     | 148.7 | 4.8      | 37.7     | 88.6  | 0.4             | 5.7      | 83.0  | 2.2      | 16.1     | 81.6  |
| 1988–1992 | 1.2             | 10.0     | 100.6 | 6.6      | 42.7     | 120.2 | 0.0             | 3.3      | 63.2  | 2.2      | 15.5     | 86.7  |
| 1993–1997 | 1.4             | 11.4     | 100.9 | 5.2      | 40.1     | 99.5  | 0.0             | 3.3      | 63.1  | 1.4      | 12.4     | 78.1  |
| 1998–2002 | 3.2             | 21.3     | 135.0 | 6.8      | 58.0     | 91.3  | 0.8             | 7.1      | 101.7 | 2.0      | 17.1     | 90.7  |
| 2003–2007 | 2.4             | 20.3     | 116.1 | 8.0      | 58.1     | 100.6 | 0.8             | 8.8      | 97.9  | 2.8      | 18.1     | 108.1 |
| 2008–2012 | 1.4             | 19.5     | 92.1  | 8.6      | 55.1     | 113.5 | 0.6             | 8.8      | 91.2  | 1.4      | 12.8     | 85.7  |
| -----     |                 |          |       |          |          |       |                 |          |       |          |          |       |
|           | 25–34           |          |       | 65–74    |          |       | 25–34           |          |       | 65–74    |          |       |
| 1983–1987 | 5.6             | 37.4     | 146.3 | 3.6      | 42.8     | 97.7  | 1.0             | 9.5      | 88.3  | 4.4      | 35.5     | 113.6 |
| 1988–1992 | 2.0             | 18.5     | 96.8  | 2.6      | 29.9     | 84.7  | 2.0             | 12.1     | 139.8 | 3.0      | 23.5     | 90.0  |
| 1993–1997 | 2.4             | 21.2     | 108.7 | 3.2      | 28.7     | 90.0  | 1.4             | 10.0     | 120.4 | 3.6      | 22.3     | 114.7 |
| 1998–2002 | 4.0             | 31.2     | 115.6 | 6.4      | 49.1     | 107.9 | 0.4             | 8.8      | 75.8  | 2.6      | 18.4     | 87.4  |
| 2003–2007 | 3.0             | 28.7     | 92.5  | 3.8      | 36.2     | 84.4  | 1.0             | 11.6     | 89.0  | 3.0      | 20.1     | 107.8 |
| 2008–2012 | 4.0             | 36.4     | 111.7 | 2.2      | 28.7     | 72.6  | 0.8             | 12.3     | 86.2  | 1.4      | 14.8     | 83.2  |
| -----     |                 |          |       |          |          |       |                 |          |       |          |          |       |
|           | 35–44           |          |       | >74 y/o  |          |       | 35–44           |          |       | >74 y/o  |          |       |
| 1983–1987 | 7.0             | 42.9     | 134.8 | 4.2      | 75.8     | 96.8  | 1.2             | 10.4     | 88.4  | 3.4      | 42.5     | 73.7  |
| 1988–1992 | 4.8             | 29.3     | 123.4 | 3.0      | 50.9     | 79.0  | 1.6             | 10.3     | 106.4 | 4.4      | 41.6     | 87.0  |
| 1993–1997 | 5.2             | 34.1     | 139.3 | 2.6      | 40.3     | 77.4  | 1.2             | 8.8      | 103.5 | 4.0      | 31.8     | 92.4  |
| 1998–2002 | 5.6             | 44.0     | 124.8 | 6.0      | 66.7     | 126.6 | 1.0             | 9.7      | 93.4  | 4.4      | 29.2     | 94.1  |
| 2003–2007 | 4.8             | 44.3     | 110.5 | 5.6      | 51.9     | 115.2 | 1.2             | 12.2     | 96.4  | 4.4      | 23.7     | 105.8 |
| 2008–2012 | 4.0             | 37.1     | 99.8  | 5.0      | 42.5     | 102.4 | 0.8             | 11.5     | 84.7  | 3.8      | 18.8     | 97.6  |



Secondary Medical Zone ID: 248

|                 | Male            |                  |       |                 |                  |       | Female          |                  |       |                 |                  |       |
|-----------------|-----------------|------------------|-------|-----------------|------------------|-------|-----------------|------------------|-------|-----------------|------------------|-------|
|                 | Suicide         |                  |       | Suicide         |                  |       | Suicide         |                  |       | Suicide         |                  |       |
|                 | Num<br>per year | Rate<br>/100,000 | × 100 | Num<br>per year | Rate<br>/100,000 | × 100 | Num<br>per year | Rate<br>/100,000 | × 100 | Num<br>per year | Rate<br>/100,000 | × 100 |
|                 |                 |                  |       |                 |                  |       |                 |                  |       |                 |                  |       |
| Total (>10 y/o) | 45–54           | Total (>10 y/o)  | 45–54 |                 |                  |       |                 |                  |       |                 |                  |       |
| 1983–1987       | 139.8           | 29.9             | 90.3  | 36.6            | 48.8             | 96.5  | 67.8            | 13.3             | 85.6  | 11.8            | 15.8             | 91.8  |
| 1988–1992       | 116.2           | 22.5             | 90.5  | 23.6            | 27.5             | 80.2  | 69.0            | 11.7             | 90.8  | 14.2            | 16.0             | 109.3 |
| 1993–1997       | 133.4           | 23.4             | 93.4  | 36.4            | 35.8             | 97.8  | 59.6            | 9.4              | 84.6  | 13.6            | 13.3             | 103.2 |
| 1998–2002       | 195.0           | 32.3             | 90.2  | 50.6            | 51.5             | 92.0  | 73.0            | 10.9             | 84.1  | 15.2            | 15.3             | 101.7 |
| 2003–2007       | 204.8           | 34.0             | 92.1  | 46.4            | 55.2             | 98.6  | 75.8            | 11.1             | 87.8  | 11.6            | 13.6             | 99.4  |
| 2008–2012       | 187.0           | 31.4             | 90.2  | 31.4            | 40.6             | 83.5  | 80.4            | 12.4             | 91.9  | 11.8            | 14.7             | 98.9  |
|                 | 15–24           |                  |       | 55–64           |                  |       | 15–24           |                  |       | 55–64           |                  |       |
| 1983–1987       | 8.0             | 9.5              | 67.9  | 21.8            | 42.0             | 98.8  | 5.8             | 6.7              | 97.8  | 10.6            | 18.1             | 91.5  |
| 1988–1992       | 8.2             | 8.3              | 84.2  | 21.4            | 34.5             | 97.2  | 5.0             | 5.0              | 94.5  | 9.8             | 15.1             | 84.7  |
| 1993–1997       | 11.0            | 11.1             | 98.0  | 27.0            | 38.9             | 96.6  | 4.0             | 4.2              | 80.6  | 9.2             | 13.1             | 82.2  |
| 1998–2002       | 10.8            | 13.3             | 84.1  | 47.2            | 59.1             | 93.0  | 5.2             | 6.3              | 89.8  | 15.8            | 18.9             | 100.4 |
| 2003–2007       | 11.2            | 15.8             | 90.7  | 45.8            | 49.4             | 85.6  | 3.4             | 5.4              | 60.5  | 14.4            | 15.1             | 90.3  |
| 2008–2012       | 13.8            | 21.3             | 100.6 | 40.2            | 44.0             | 90.5  | 5.8             | 9.1              | 94.0  | 13.8            | 14.5             | 96.9  |
|                 | 25–34           |                  |       | 65–74           |                  |       | 25–34           |                  |       | 65–74           |                  |       |
| 1983–1987       | 22.0            | 25.1             | 98.1  | 9.8             | 34.6             | 79.1  | 7.2             | 8.5              | 78.7  | 11.6            | 29.7             | 95.0  |
| 1988–1992       | 17.2            | 20.1             | 104.9 | 11.4            | 33.1             | 93.8  | 4.6             | 5.9              | 68.4  | 12.4            | 26.4             | 101.4 |
| 1993–1997       | 17.2            | 19.0             | 97.0  | 13.0            | 29.9             | 93.9  | 6.8             | 7.5              | 90.7  | 8.4             | 15.7             | 80.3  |
| 1998–2002       | 22.0            | 22.5             | 83.3  | 22.8            | 43.7             | 96.0  | 9.2             | 9.4              | 80.9  | 11.0            | 18.0             | 85.7  |
| 2003–2007       | 25.2            | 26.7             | 86.2  | 22.8            | 38.5             | 89.8  | 8.4             | 9.1              | 70.2  | 12.6            | 18.4             | 98.6  |
| 2008–2012       | 24.6            | 30.8             | 94.5  | 24.0            | 35.3             | 89.3  | 11.6            | 14.0             | 97.4  | 11.0            | 14.7             | 82.9  |
|                 | 35–44           |                  |       | >74 y/o         |                  |       | 35–44           |                  |       | >74 y/o         |                  |       |
| 1983–1987       | 28.6            | 26.8             | 84.3  | 12.2            | 77.5             | 99.0  | 10.2            | 9.8              | 83.0  | 10.4            | 43.5             | 75.3  |
| 1988–1992       | 22.2            | 21.7             | 91.3  | 12.2            | 60.1             | 93.2  | 10.6            | 10.2             | 105.4 | 12.0            | 35.8             | 74.9  |
| 1993–1997       | 18.6            | 21.4             | 87.3  | 10.2            | 42.8             | 82.3  | 6.6             | 7.6              | 89.8  | 11.0            | 25.8             | 75.1  |
| 1998–2002       | 24.8            | 30.1             | 85.3  | 16.4            | 54.2             | 102.9 | 6.2             | 7.9              | 76.1  | 10.4            | 19.6             | 63.2  |
| 2003–2007       | 36.6            | 41.0             | 102.2 | 16.6            | 42.9             | 95.2  | 11.8            | 13.0             | 103.0 | 13.6            | 20.0             | 89.3  |
| 2008–2012       | 33.0            | 33.2             | 89.1  | 20.0            | 42.4             | 102.1 | 14.8            | 14.3             | 105.4 | 11.6            | 14.7             | 76.5  |

Secondary Medical Zone ID: 249

|                 | Male            |                  |       |                 |                  |       | Female          |                  |       |                 |                  |       |
|-----------------|-----------------|------------------|-------|-----------------|------------------|-------|-----------------|------------------|-------|-----------------|------------------|-------|
|                 | Suicide         |                  |       | Suicide         |                  |       | Suicide         |                  |       | Suicide         |                  |       |
|                 | Num<br>per year | Rate<br>/100,000 | × 100 | Num<br>per year | Rate<br>/100,000 | × 100 | Num<br>per year | Rate<br>/100,000 | × 100 | Num<br>per year | Rate<br>/100,000 | × 100 |
|                 |                 |                  |       |                 |                  |       |                 |                  |       |                 |                  |       |
| Total (>10 y/o) | 45–54           | Total (>10 y/o)  | 45–54 |                 |                  |       |                 |                  |       |                 |                  |       |
| 1983–1987       | 15.8            | 32.5             | 98.5  | 3.8             | 50.1             | 99.0  | 7.0             | 14.1             | 87.1  | 1.0             | 15.4             | 89.6  |
| 1988–1992       | 14.0            | 24.5             | 100.2 | 2.6             | 31.7             | 92.3  | 9.6             | 13.1             | 107.1 | 2.2             | 17.5             | 120.0 |
| 1993–1997       | 15.6            | 25.0             | 98.3  | 3.4             | 33.6             | 91.9  | 7.4             | 10.4             | 92.2  | 1.6             | 13.5             | 104.2 |
| 1998–2002       | 21.6            | 34.0             | 91.0  | 6.2             | 54.8             | 97.9  | 9.6             | 12.4             | 95.6  | 1.6             | 14.5             | 96.5  |
| 2003–2007       | 18.2            | 31.2             | 77.3  | 4.6             | 49.2             | 88.0  | 7.6             | 11.4             | 84.6  | 1.2             | 12.8             | 93.7  |
| 2008–2012       | 21.4            | 33.4             | 95.0  | 3.6             | 45.5             | 93.7  | 8.0             | 12.2             | 88.9  | 1.2             | 14.2             | 95.4  |
|                 | 15–24           |                  |       | 55–64           |                  |       | 15–24           |                  |       | 55–64           |                  |       |
| 1983–1987       | 1.4             | 16.3             | 116.8 | 2.2             | 38.2             | 90.0  | 0.0             | 5.0              | 73.3  | 1.8             | 21.7             | 110.1 |
| 1988–1992       | 1.0             | 10.4             | 105.4 | 2.4             | 33.4             | 94.0  | 1.0             | 6.9              | 130.5 | 1.0             | 15.6             | 87.5  |
| 1993–1997       | 1.0             | 11.1             | 98.2  | 4.0             | 45.4             | 112.7 | 0.8             | 6.1              | 116.5 | 2.0             | 18.7             | 117.5 |
| 1998–2002       | 2.4             | 20.2             | 127.6 | 4.0             | 51.8             | 81.5  | 1.2             | 8.8              | 125.4 | 1.8             | 18.8             | 99.6  |
| 2003–2007       | 1.0             | 16.0             | 91.8  | 4.2             | 45.2             | 78.3  | 0.2             | 6.7              | 74.4  | 1.8             | 16.5             | 98.3  |
| 2008–2012       | 1.6             | 22.4             | 105.5 | 4.6             | 43.9             | 90.5  | 0.2             | 7.4              | 76.8  | 1.0             | 12.6             | 84.2  |
|                 | 25–34           |                  |       | 65–74           |                  |       | 25–34           |                  |       | 65–74           |                  |       |
| 1983–1987       | 1.6             | 23.0             | 89.8  | 2.0             | 48.7             | 111.2 | 0.6             | 9.4              | 87.7  | 1.0             | 26.7             | 85.4  |
| 1988–1992       | 1.4             | 18.8             | 98.5  | 1.4             | 32.8             | 93.2  | 0.8             | 8.9              | 103.2 | 1.8             | 28.4             | 108.9 |
| 1993–1997       | 1.2             | 17.5             | 89.5  | 1.0             | 23.7             | 74.4  | 0.4             | 7.1              | 85.8  | 0.8             | 15.1             | 77.7  |
| 1998–2002       | 2.4             | 27.2             | 100.8 | 2.8             | 42.8             | 94.1  | 0.4             | 9.2              | 79.6  | 1.8             | 21.4             | 101.7 |
| 2003–2007       | 2.4             | 29.7             | 95.7  | 2.4             | 37.4             | 87.1  | 1.2             | 13.1             | 100.4 | 1.2             | 16.6             | 89.3  |
| 2008–2012       | 2.2             | 31.2             | 95.9  | 3.6             | 41.7             | 105.4 | 1.0             | 13.9             | 97.2  | 1.8             | 18.5             | 103.9 |
|                 | 35–44           |                  |       | >74 y/o         |                  |       | 35–44           |                  |       | >74 y/o         |                  |       |
| 1983–1987       | 3.0             | 30.4             | 95.5  | 1.8             | 83.4             | 106.4 | 1.0             | 11.1             | 93.9  | 1.6             | 54.7             | 94.8  |
| 1988–1992       | 2.4             | 22.7             | 95.6  | 2.8             | 86.3             | 133.8 | 1.0             | 9.5              | 98.2  | 1.8             | 44.3             | 92.6  |
| 1993–1997       | 3.4             | 30.0             | 122.3 | 1.6             | 49.9             | 95.8  | 0.6             | 7.5              | 87.8  | 1.2             | 25.5             | 74.1  |
| 1998–2002       | 2.2             | 29.6             | 84.1  | 1.6             | 44.5             | 84.3  | 1.0             | 10.4             | 101.0 | 1.8             | 26.7             | 86.1  |
| 2003–2007       | 1.4             | 25.6             | 63.9  | 2.2             | 42.3             | 93.9  | 0.6             | 10.7             | 84.4  | 1.4             | 17.5             | 77.8  |
| 2008–2012       | 3.0             | 35.5             | 95.4  | 2.8             | 42.1             | 101.6 | 1.8             | 15.3             | 113.0 | 1.0             | 13.1             | 68.0  |

Secondary Medical Zone ID: 250

|           | Male            |                  |       |                 |                  |       | Female          |                  |       |                 |                  |       |
|-----------|-----------------|------------------|-------|-----------------|------------------|-------|-----------------|------------------|-------|-----------------|------------------|-------|
|           | Suicide         |                  |       | Suicide         |                  |       | Suicide         |                  |       | Suicide         |                  |       |
|           | Num<br>per year | Rate<br>/100,000 | × 100 | Num<br>per year | Rate<br>/100,000 | × 100 | Num<br>per year | Rate<br>/100,000 | × 100 | Num<br>per year | Rate<br>/100,000 | × 100 |
|           |                 |                  |       |                 |                  |       |                 |                  |       |                 |                  |       |
|           | Total (>10 y/o) |                  |       | 45–54           |                  |       | Total (>10 y/o) |                  |       | 45–54           |                  |       |
| 1983–1987 | 43.6            | 32.1             | 97.2  | 11.0            | 50.2             | 99.3  | 24.8            | 14.6             | 94.8  | 3.6             | 16.1             | 93.2  |
| 1988–1992 | 34.8            | 24.8             | 97.6  | 8.4             | 36.3             | 105.6 | 17.8            | 11.1             | 78.2  | 3.4             | 14.5             | 99.1  |
| 1993–1997 | 35.6            | 25.1             | 96.9  | 11.6            | 44.7             | 122.2 | 16.2            | 10.1             | 82.9  | 3.4             | 13.4             | 103.9 |
| 1998–2002 | 50.4            | 35.7             | 97.4  | 13.0            | 58.9             | 105.3 | 17.6            | 11.4             | 81.6  | 3.4             | 15.4             | 102.3 |
| 2003–2007 | 50.2            | 37.6             | 101.2 | 10.2            | 59.1             | 105.7 | 18.2            | 12.7             | 91.6  | 3.4             | 16.8             | 122.3 |
| 2008–2012 | 41.0            | 33.3             | 94.1  | 7.8             | 52.0             | 107.1 | 15.0            | 12.2             | 84.7  | 2.8             | 17.0             | 113.7 |
|           | 15–24           |                  |       | 55–64           |                  |       | 15–24           |                  |       | 55–64           |                  |       |
| 1983–1987 | 2.8             | 14.2             | 101.8 | 7.8             | 43.0             | 101.3 | 1.2             | 6.3              | 92.3  | 4.4             | 20.1             | 101.6 |
| 1988–1992 | 2.0             | 9.5              | 95.8  | 6.2             | 32.0             | 90.2  | 1.0             | 5.0              | 94.7  | 3.8             | 17.2             | 96.1  |
| 1993–1997 | 2.6             | 12.1             | 107.4 | 6.2             | 33.4             | 83.0  | 1.0             | 5.3              | 100.9 | 2.4             | 12.6             | 79.0  |
| 1998–2002 | 1.6             | 12.8             | 81.1  | 12.0            | 58.9             | 92.6  | 1.0             | 6.9              | 98.7  | 4.0             | 18.2             | 96.5  |
| 2003–2007 | 2.4             | 17.5             | 100.1 | 14.6            | 64.1             | 111.0 | 1.2             | 9.3              | 103.5 | 3.0             | 14.5             | 86.7  |
| 2008–2012 | 2.0             | 18.9             | 89.1  | 9.8             | 48.4             | 99.6  | 0.6             | 7.8              | 80.5  | 2.4             | 13.1             | 88.0  |
|           | 25–34           |                  |       | 65–74           |                  |       | 25–34           |                  |       | 65–74           |                  |       |
| 1983–1987 | 6.2             | 31.4             | 122.8 | 4.0             | 35.9             | 81.9  | 1.8             | 10.1             | 93.6  | 6.2             | 36.4             | 116.3 |
| 1988–1992 | 3.8             | 21.5             | 112.5 | 3.0             | 26.4             | 75.0  | 1.4             | 8.5              | 98.1  | 2.8             | 17.9             | 68.6  |
| 1993–1997 | 4.2             | 22.5             | 115.0 | 3.0             | 23.0             | 72.0  | 1.0             | 7.3              | 87.2  | 1.8             | 11.8             | 60.5  |
| 1998–2002 | 4.2             | 24.4             | 90.3  | 6.4             | 40.5             | 89.1  | 1.8             | 11.1             | 95.5  | 3.0             | 16.4             | 78.1  |
| 2003–2007 | 5.0             | 29.6             | 95.5  | 6.0             | 37.1             | 86.5  | 1.4             | 11.1             | 85.2  | 2.8             | 15.4             | 82.5  |
| 2008–2012 | 4.0             | 30.0             | 92.2  | 5.2             | 32.0             | 81.1  | 1.6             | 13.7             | 95.8  | 2.0             | 13.1             | 73.4  |
|           | 35–44           |                  |       | >74 y/o         |                  |       | 35–44           |                  |       | >74 y/o         |                  |       |
| 1983–1987 | 9.0             | 34.2             | 107.3 | 2.8             | 49.6             | 63.3  | 3.2             | 11.9             | 100.9 | 4.2             | 40.9             | 70.9  |
| 1988–1992 | 8.0             | 31.8             | 134.3 | 3.4             | 45.7             | 70.8  | 2.4             | 10.1             | 104.6 | 3.0             | 24.5             | 51.3  |
| 1993–1997 | 4.4             | 24.3             | 99.1  | 3.4             | 39.4             | 75.6  | 3.2             | 13.3             | 156.8 | 3.4             | 22.2             | 64.4  |
| 1998–2002 | 7.4             | 43.7             | 124.2 | 5.8             | 53.3             | 101.1 | 0.8             | 7.9              | 76.3  | 3.6             | 20.0             | 64.3  |
| 2003–2007 | 7.6             | 46.6             | 116.4 | 4.4             | 36.7             | 81.5  | 2.8             | 15.3             | 120.8 | 3.6             | 16.7             | 74.4  |
| 2008–2012 | 6.2             | 36.7             | 98.5  | 6.0             | 40.9             | 98.6  | 2.4             | 14.2             | 104.7 | 3.2             | 13.8             | 71.8  |

Secondary Medical Zone ID: 251

|                 | Male            |                  |       |                 |                  |       | Female          |                  |       |                 |                  |       |
|-----------------|-----------------|------------------|-------|-----------------|------------------|-------|-----------------|------------------|-------|-----------------|------------------|-------|
|                 | Suicide         |                  |       | Suicide         |                  |       | Suicide         |                  |       | Suicide         |                  |       |
|                 | Num<br>per year | Rate<br>/100,000 | × 100 | Num<br>per year | Rate<br>/100,000 | × 100 | Num<br>per year | Rate<br>/100,000 | × 100 | Num<br>per year | Rate<br>/100,000 | × 100 |
|                 |                 |                  |       |                 |                  |       |                 |                  |       |                 |                  |       |
| Total (>10 y/o) | 45–54           | Total (>10 y/o)  | 45–54 |                 |                  |       |                 |                  |       |                 |                  |       |
| 1983–1987       | 26.0            | 34.2             | 107.2 | 6.8             | 57.7             | 114.1 | 12.0            | 14.5             | 91.5  | 1.4             | 15.0             | 87.2  |
| 1988–1992       | 23.6            | 26.7             | 112.7 | 4.4             | 34.4             | 100.1 | 15.4            | 13.5             | 113.8 | 1.2             | 12.6             | 86.2  |
| 1993–1997       | 25.6            | 26.0             | 107.8 | 6.0             | 38.1             | 104.1 | 13.6            | 11.4             | 109.4 | 2.0             | 13.1             | 101.2 |
| 1998–2002       | 33.4            | 34.1             | 94.1  | 9.4             | 59.6             | 106.5 | 14.0            | 12.2             | 96.7  | 2.2             | 14.8             | 98.1  |
| 2003–2007       | 34.0            | 34.6             | 91.0  | 7.6             | 56.5             | 101.0 | 12.0            | 11.7             | 88.5  | 0.8             | 10.5             | 76.4  |
| 2008–2012       | 34.2            | 33.9             | 95.8  | 5.8             | 46.8             | 96.4  | 12.6            | 12.5             | 92.4  | 2.2             | 16.0             | 107.5 |
|                 | 15–24           |                  |       | 55–64           |                  |       | 15–24           |                  |       | 55–64           |                  |       |
| 1983–1987       | 2.0             | 16.4             | 117.5 | 4.8             | 48.0             | 113.0 | 0.4             | 5.9              | 86.6  | 2.0             | 18.9             | 95.8  |
| 1988–1992       | 1.8             | 10.9             | 110.6 | 5.4             | 44.8             | 126.3 | 0.8             | 5.7              | 107.6 | 2.8             | 20.6             | 115.6 |
| 1993–1997       | 2.6             | 12.4             | 110.1 | 5.6             | 45.8             | 113.7 | 1.0             | 5.8              | 111.1 | 2.8             | 19.7             | 123.6 |
| 1998–2002       | 1.4             | 11.1             | 70.5  | 8.2             | 63.7             | 100.2 | 0.6             | 5.8              | 82.8  | 3.0             | 20.6             | 109.5 |
| 2003–2007       | 2.4             | 14.7             | 84.2  | 7.0             | 49.1             | 85.1  | 1.2             | 8.8              | 97.9  | 2.2             | 15.6             | 93.4  |
| 2008–2012       | 3.0             | 18.9             | 89.3  | 6.2             | 43.6             | 89.8  | 1.2             | 9.7              | 99.7  | 2.2             | 14.6             | 97.8  |
|                 | 25–34           |                  |       | 65–74           |                  |       | 25–34           |                  |       | 65–74           |                  |       |
| 1983–1987       | 2.6             | 25.2             | 98.5  | 2.4             | 41.3             | 94.4  | 0.4             | 7.8              | 72.4  | 1.8             | 25.5             | 81.7  |
| 1988–1992       | 2.2             | 20.0             | 104.8 | 2.0             | 31.7             | 89.9  | 1.0             | 8.9              | 102.6 | 2.2             | 24.4             | 93.4  |
| 1993–1997       | 2.8             | 21.3             | 109.0 | 3.2             | 36.1             | 113.3 | 0.2             | 5.8              | 69.7  | 3.0             | 24.8             | 127.2 |
| 1998–2002       | 2.6             | 22.3             | 82.6  | 4.2             | 45.0             | 99.0  | 1.6             | 11.7             | 101.3 | 2.2             | 20.2             | 96.4  |
| 2003–2007       | 4.6             | 30.9             | 99.5  | 4.6             | 44.4             | 103.5 | 2.0             | 13.9             | 106.7 | 1.0             | 13.7             | 73.7  |
| 2008–2012       | 5.2             | 35.6             | 109.2 | 4.4             | 38.7             | 97.9  | 2.0             | 15.4             | 107.5 | 1.6             | 15.6             | 87.6  |
|                 | 35–44           |                  |       | >74 y/o         |                  |       | 35–44           |                  |       | >74 y/o         |                  |       |
| 1983–1987       | 5.2             | 34.1             | 107.2 | 1.8             | 60.0             | 76.6  | 2.8             | 15.0             | 127.0 | 3.2             | 58.4             | 101.2 |
| 1988–1992       | 5.0             | 30.5             | 128.8 | 2.8             | 62.7             | 97.3  | 2.4             | 12.4             | 128.6 | 4.8             | 60.1             | 125.6 |
| 1993–1997       | 2.6             | 21.6             | 88.2  | 2.8             | 53.6             | 102.9 | 1.6             | 10.1             | 119.1 | 3.0             | 32.4             | 94.1  |
| 1998–2002       | 3.6             | 30.8             | 87.5  | 3.8             | 58.9             | 111.7 | 0.8             | 8.6              | 83.5  | 3.6             | 31.4             | 101.1 |
| 2003–2007       | 5.0             | 37.6             | 93.8  | 2.8             | 39.9             | 88.6  | 1.6             | 12.4             | 98.4  | 3.2             | 23.2             | 103.3 |
| 2008–2012       | 6.8             | 41.2             | 110.9 | 2.6             | 33.7             | 81.3  | 0.8             | 10.3             | 75.8  | 2.4             | 16.7             | 87.1  |

Secondary Medical Zone ID: 252

|           | Male            |                  |       |                 |                  |       | Female          |                  |       |                 |                  |       |
|-----------|-----------------|------------------|-------|-----------------|------------------|-------|-----------------|------------------|-------|-----------------|------------------|-------|
|           | Suicide         |                  |       | Suicide         |                  |       | Suicide         |                  |       | Suicide         |                  |       |
|           | Num<br>per year | Rate<br>/100,000 | × 100 | Num<br>per year | Rate<br>/100,000 | × 100 | Num<br>per year | Rate<br>/100,000 | × 100 | Num<br>per year | Rate<br>/100,000 | × 100 |
|           |                 |                  |       |                 |                  |       |                 |                  |       |                 |                  |       |
|           | Total (>10 y/o) |                  |       | 45–54           |                  |       | Total (>10 y/o) |                  |       | 45–54           |                  |       |
| 1983–1987 | 49.6            | 36.7             | 115.0 | 10.8            | 52.8             | 104.4 | 30.4            | 17.2             | 118.4 | 4.8             | 20.1             | 116.4 |
| 1988–1992 | 41.0            | 28.6             | 119.8 | 7.6             | 36.9             | 107.4 | 25.6            | 13.6             | 110.4 | 5.2             | 19.8             | 135.2 |
| 1993–1997 | 40.4            | 28.0             | 114.9 | 10.8            | 45.3             | 123.8 | 20.0            | 10.9             | 101.6 | 3.0             | 13.2             | 102.1 |
| 1998–2002 | 54.4            | 38.3             | 109.1 | 13.8            | 62.1             | 111.0 | 25.6            | 12.9             | 112.1 | 2.4             | 13.0             | 86.4  |
| 2003–2007 | 52.0            | 38.6             | 107.4 | 11.0            | 59.6             | 106.6 | 23.0            | 13.2             | 110.9 | 2.6             | 14.0             | 102.2 |
| 2008–2012 | 48.8            | 37.8             | 111.9 | 8.0             | 51.8             | 106.6 | 19.4            | 12.6             | 101.8 | 3.4             | 18.4             | 123.3 |
|           | 15–24           |                  |       | 55–64           |                  |       | 15–24           |                  |       | 55–64           |                  |       |
| 1983–1987 | 3.8             | 20.8             | 149.2 | 8.6             | 45.7             | 107.6 | 1.4             | 7.3              | 107.4 | 5.2             | 22.3             | 113.0 |
| 1988–1992 | 2.0             | 11.2             | 112.8 | 9.2             | 44.0             | 123.8 | 1.4             | 6.4              | 121.9 | 4.4             | 18.9             | 105.6 |
| 1993–1997 | 2.6             | 13.8             | 122.2 | 8.2             | 42.6             | 105.7 | 1.0             | 5.5              | 106.2 | 3.6             | 16.5             | 103.8 |
| 1998–2002 | 3.4             | 20.3             | 128.6 | 12.8            | 66.5             | 104.7 | 0.8             | 6.5              | 92.3  | 4.6             | 20.7             | 109.9 |
| 2003–2007 | 2.6             | 19.4             | 111.3 | 13.2            | 61.4             | 106.4 | 1.2             | 9.4              | 104.8 | 4.2             | 18.0             | 107.5 |
| 2008–2012 | 3.0             | 24.6             | 116.1 | 10.0            | 47.6             | 97.9  | 0.4             | 7.2              | 73.9  | 3.2             | 14.9             | 100.0 |
|           | 25–34           |                  |       | 65–74           |                  |       | 25–34           |                  |       | 65–74           |                  |       |
| 1983–1987 | 5.4             | 28.2             | 110.4 | 4.2             | 38.3             | 87.5  | 2.8             | 13.1             | 121.4 | 4.8             | 31.6             | 101.3 |
| 1988–1992 | 6.0             | 32.7             | 171.3 | 3.6             | 29.2             | 82.9  | 1.2             | 8.1              | 93.6  | 4.4             | 25.1             | 96.1  |
| 1993–1997 | 4.8             | 28.3             | 144.9 | 4.6             | 30.0             | 93.9  | 1.4             | 8.8              | 105.4 | 4.8             | 22.6             | 116.0 |
| 1998–2002 | 6.4             | 36.0             | 133.5 | 9.0             | 51.1             | 112.3 | 2.2             | 12.8             | 110.1 | 5.4             | 24.2             | 115.2 |
| 2003–2007 | 2.4             | 22.1             | 71.3  | 8.4             | 48.8             | 113.8 | 1.2             | 10.9             | 83.7  | 4.0             | 19.4             | 104.4 |
| 2008–2012 | 4.4             | 33.6             | 103.3 | 7.2             | 42.1             | 106.7 | 1.2             | 12.6             | 88.0  | 4.4             | 20.6             | 115.5 |
|           | 35–44           |                  |       | >74 y/o         |                  |       | 35–44           |                  |       | >74 y/o         |                  |       |
| 1983–1987 | 10.0            | 40.0             | 125.6 | 6.8             | 96.3             | 122.9 | 2.8             | 11.9             | 100.5 | 8.4             | 77.4             | 134.1 |
| 1988–1992 | 5.8             | 25.4             | 107.2 | 6.4             | 74.3             | 115.2 | 1.0             | 7.1              | 73.6  | 7.8             | 56.2             | 117.4 |
| 1993–1997 | 4.4             | 24.0             | 98.0  | 5.0             | 52.0             | 99.9  | 1.2             | 7.5              | 88.0  | 5.0             | 31.0             | 90.1  |
| 1998–2002 | 4.0             | 28.7             | 81.6  | 5.0             | 45.5             | 86.3  | 1.4             | 9.6              | 92.8  | 8.8             | 42.1             | 135.7 |
| 2003–2007 | 7.8             | 50.9             | 127.0 | 6.6             | 46.8             | 104.0 | 2.6             | 14.8             | 117.1 | 7.2             | 29.0             | 129.0 |
| 2008–2012 | 8.4             | 47.4             | 127.4 | 7.8             | 47.3             | 114.0 | 1.2             | 11.1             | 82.0  | 5.6             | 20.5             | 106.8 |

Secondary Medical Zone ID: 253

|                 | Male            |                  |       |                 |                  |       | Female          |                  |       |                 |                  |       |
|-----------------|-----------------|------------------|-------|-----------------|------------------|-------|-----------------|------------------|-------|-----------------|------------------|-------|
|                 | Suicide         |                  |       | Suicide         |                  |       | Suicide         |                  |       | Suicide         |                  |       |
|                 | Num<br>per year | Rate<br>/100,000 | × 100 | Num<br>per year | Rate<br>/100,000 | × 100 | Num<br>per year | Rate<br>/100,000 | × 100 | Num<br>per year | Rate<br>/100,000 | × 100 |
|                 |                 |                  |       |                 |                  |       |                 |                  |       |                 |                  |       |
| Total (>10 y/o) | 45–54           | Total (>10 y/o)  | 45–54 |                 |                  |       |                 |                  |       |                 |                  |       |
| 1983–1987       | 64.6            | 32.2             | 98.2  | 20.4            | 61.6             | 121.8 | 39.2            | 16.2             | 108.6 | 5.8             | 17.3             | 100.6 |
| 1988–1992       | 48.4            | 22.9             | 90.9  | 11.2            | 32.0             | 93.2  | 29.0            | 11.7             | 88.3  | 5.2             | 14.5             | 98.9  |
| 1993–1997       | 53.4            | 23.6             | 91.6  | 16.2            | 39.5             | 108.0 | 28.6            | 10.4             | 95.2  | 5.8             | 13.8             | 107.2 |
| 1998–2002       | 81.4            | 34.0             | 93.3  | 22.2            | 56.0             | 100.1 | 32.0            | 11.6             | 89.7  | 5.4             | 14.0             | 93.2  |
| 2003–2007       | 85.6            | 35.5             | 97.2  | 19.4            | 57.3             | 102.4 | 30.8            | 11.5             | 89.8  | 4.6             | 13.5             | 98.3  |
| 2008–2012       | 78.2            | 35.0             | 97.6  | 16.0            | 53.8             | 110.7 | 33.8            | 13.0             | 98.9  | 4.0             | 13.9             | 93.2  |
|                 | 15–24           |                  |       | 55–64           |                  |       | 15–24           |                  |       | 55–64           |                  |       |
| 1983–1987       | 1.6             | 7.6              | 54.1  | 9.2             | 38.5             | 90.6  | 2.2             | 6.9              | 101.2 | 11.2            | 34.3             | 174.0 |
| 1988–1992       | 2.8             | 8.9              | 89.9  | 8.6             | 31.2             | 87.9  | 2.0             | 5.6              | 105.4 | 3.2             | 12.6             | 70.6  |
| 1993–1997       | 1.8             | 7.3              | 64.6  | 10.0            | 34.3             | 85.1  | 1.4             | 4.5              | 86.7  | 4.0             | 13.2             | 83.3  |
| 1998–2002       | 5.0             | 16.2             | 102.3 | 20.2            | 60.7             | 95.6  | 2.4             | 7.7              | 110.3 | 3.8             | 13.4             | 71.0  |
| 2003–2007       | 2.8             | 13.4             | 77.1  | 19.6            | 52.3             | 90.6  | 1.8             | 8.0              | 88.8  | 5.4             | 14.7             | 87.6  |
| 2008–2012       | 4.4             | 20.7             | 97.7  | 15.0            | 41.2             | 84.9  | 2.4             | 10.8             | 111.6 | 6.4             | 15.7             | 105.3 |
|                 | 25–34           |                  |       | 65–74           |                  |       | 25–34           |                  |       | 65–74           |                  |       |
| 1983–1987       | 8.2             | 24.0             | 93.7  | 5.0             | 37.3             | 85.2  | 3.4             | 10.0             | 92.5  | 4.8             | 26.7             | 85.6  |
| 1988–1992       | 7.2             | 22.7             | 118.9 | 2.8             | 20.8             | 59.1  | 2.6             | 8.4              | 96.6  | 5.6             | 25.5             | 97.7  |
| 1993–1997       | 7.2             | 22.5             | 115.0 | 4.2             | 22.2             | 69.7  | 2.2             | 7.4              | 89.0  | 4.4             | 17.4             | 89.4  |
| 1998–2002       | 9.8             | 28.1             | 104.2 | 10.8            | 44.5             | 97.8  | 3.2             | 10.0             | 86.5  | 7.6             | 24.9             | 118.5 |
| 2003–2007       | 10.8            | 31.6             | 101.8 | 12.0            | 44.7             | 104.1 | 4.0             | 12.2             | 94.0  | 6.6             | 20.7             | 110.9 |
| 2008–2012       | 8.8             | 31.4             | 96.4  | 11.2            | 38.4             | 97.1  | 3.8             | 13.9             | 96.9  | 5.4             | 16.8             | 94.6  |
|                 | 35–44           |                  |       | >74 y/o         |                  |       | 35–44           |                  |       | >74 y/o         |                  |       |
| 1983–1987       | 12.8            | 30.5             | 95.8  | 7.4             | 88.6             | 113.1 | 4.0             | 10.2             | 86.0  | 7.8             | 59.6             | 103.4 |
| 1988–1992       | 11.6            | 27.5             | 115.9 | 4.0             | 44.1             | 68.4  | 4.2             | 10.1             | 104.1 | 5.8             | 35.6             | 74.3  |
| 1993–1997       | 8.8             | 24.9             | 101.7 | 5.2             | 45.2             | 86.9  | 3.6             | 9.6              | 113.3 | 7.2             | 34.7             | 100.9 |
| 1998–2002       | 8.8             | 29.6             | 84.0  | 4.4             | 33.8             | 64.1  | 2.8             | 9.4              | 90.8  | 6.6             | 26.1             | 83.9  |
| 2003–2007       | 12.2            | 39.7             | 99.1  | 8.6             | 45.5             | 101.1 | 2.2             | 9.1              | 71.7  | 6.2             | 19.6             | 87.2  |
| 2008–2012       | 15.8            | 44.2             | 118.8 | 6.6             | 31.4             | 75.8  | 5.0             | 14.2             | 104.6 | 6.6             | 17.7             | 92.3  |

Secondary Medical Zone ID: 254

|           | Male            |          |       |          |          |       | Female          |          |       |          |          |       |
|-----------|-----------------|----------|-------|----------|----------|-------|-----------------|----------|-------|----------|----------|-------|
|           | Suicide         |          |       | Suicide  |          |       | Suicide         |          |       | Suicide  |          |       |
|           | Num             | Rate     | × 100 | Num      | Rate     | × 100 | Num             | Rate     | × 100 | Num      | Rate     | × 100 |
|           | per year        | /100,000 |       | per year | /100,000 |       | per year        | /100,000 |       | per year | /100,000 |       |
|           | Total (>10 y/o) |          |       | 45–54    |          |       | Total (>10 y/o) |          |       | 45–54    |          |       |
| 1983–1987 | 25.8            | 40.2     | 138.9 | 6.8      | 74.3     | 146.9 | 16.4            | 18.3     | 137.2 | 2.0      | 19.4     | 112.4 |
| 1988–1992 | 22.4            | 31.3     | 149.0 | 3.0      | 39.8     | 115.7 | 14.8            | 15.0     | 136.4 | 1.2      | 15.0     | 102.8 |
| 1993–1997 | 21.6            | 30.3     | 142.9 | 4.0      | 44.6     | 122.0 | 9.8             | 11.2     | 113.2 | 1.2      | 13.9     | 107.2 |
| 1998–2002 | 24.4            | 39.1     | 121.9 | 5.2      | 61.9     | 110.6 | 10.0            | 12.9     | 107.1 | 0.2      | 11.7     | 77.8  |
| 2003–2007 | 25.6            | 42.1     | 133.3 | 5.8      | 74.3     | 132.8 | 12.0            | 13.2     | 129.9 | 0.8      | 13.4     | 97.9  |
| 2008–2012 | 18.8            | 36.5     | 112.2 | 4.2      | 61.1     | 125.6 | 9.2             | 14.0     | 113.5 | 1.4      | 17.7     | 118.8 |
|           | 15–24           |          |       | 55–64    |          |       | 15–24           |          |       | 55–64    |          |       |
| 1983–1987 | 0.6             | 14.0     | 100.4 | 4.0      | 45.2     | 106.3 | 0.4             | 7.3      | 106.6 | 3.8      | 28.3     | 143.4 |
| 1988–1992 | 1.0             | 11.9     | 119.8 | 6.2      | 57.3     | 161.4 | 0.4             | 5.9      | 111.6 | 2.8      | 22.3     | 124.9 |
| 1993–1997 | 1.4             | 14.5     | 128.6 | 3.4      | 43.5     | 108.1 | 0.0             | 4.3      | 81.9  | 1.4      | 16.0     | 100.9 |
| 1998–2002 | 1.6             | 20.1     | 127.3 | 4.6      | 68.0     | 107.1 | 0.0             | 5.8      | 83.1  | 1.4      | 18.8     | 99.9  |
| 2003–2007 | 0.4             | 15.8     | 90.3  | 4.8      | 63.2     | 109.4 | 0.2             | 8.2      | 91.1  | 1.6      | 18.1     | 107.9 |
| 2008–2012 | 0.4             | 18.9     | 89.3  | 4.8      | 54.5     | 112.2 | 0.0             | 7.8      | 80.3  | 0.4      | 12.5     | 83.5  |
|           | 25–34           |          |       | 65–74    |          |       | 25–34           |          |       | 65–74    |          |       |
| 1983–1987 | 3.2             | 36.0     | 140.8 | 4.2      | 61.6     | 140.6 | 1.4             | 14.2     | 132.0 | 2.8      | 35.7     | 114.3 |
| 1988–1992 | 2.8             | 32.0     | 167.6 | 2.0      | 32.9     | 93.5  | 0.2             | 7.5      | 86.9  | 4.6      | 44.2     | 169.6 |
| 1993–1997 | 0.8             | 18.5     | 94.8  | 5.0      | 53.3     | 167.0 | 0.2             | 7.5      | 90.2  | 2.0      | 20.7     | 106.3 |
| 1998–2002 | 1.4             | 26.9     | 99.5  | 4.8      | 56.0     | 123.1 | 0.0             | 9.4      | 80.7  | 2.4      | 23.4     | 111.4 |
| 2003–2007 | 2.4             | 36.4     | 117.3 | 4.2      | 54.5     | 127.1 | 0.6             | 13.0     | 99.9  | 2.4      | 23.0     | 123.4 |
| 2008–2012 | 1.4             | 32.4     | 99.3  | 3.2      | 46.7     | 118.3 | 0.6             | 14.5     | 101.1 | 2.4      | 23.0     | 129.0 |
|           | 35–44           |          |       | >74 y/o  |          |       | 35–44           |          |       | >74 y/o  |          |       |
| 1983–1987 | 3.8             | 41.5     | 130.3 | 3.2      | 82.7     | 105.6 | 1.4             | 13.8     | 117.0 | 4.6      | 77.9     | 135.1 |
| 1988–1992 | 3.2             | 31.9     | 134.6 | 4.2      | 84.9     | 131.6 | 0.8             | 10.0     | 103.2 | 4.8      | 64.2     | 134.2 |
| 1993–1997 | 3.2             | 35.2     | 143.4 | 3.8      | 68.1     | 130.7 | 0.6             | 8.7      | 102.4 | 4.4      | 49.2     | 143.0 |
| 1998–2002 | 2.4             | 38.5     | 109.3 | 4.4      | 66.9     | 127.0 | 1.6             | 14.9     | 144.2 | 4.2      | 40.0     | 128.8 |
| 2003–2007 | 3.0             | 50.1     | 125.0 | 5.0      | 62.8     | 139.5 | 0.2             | 10.9     | 86.0  | 6.2      | 45.2     | 201.4 |
| 2008–2012 | 2.2             | 38.6     | 103.8 | 2.6      | 37.7     | 90.9  | 1.6             | 17.3     | 127.9 | 2.6      | 19.8     | 102.9 |

Secondary Medical Zone ID: 255

|                 | Male            |                  |       |                 |                  |       | Female          |                  |       |                 |                  |       |
|-----------------|-----------------|------------------|-------|-----------------|------------------|-------|-----------------|------------------|-------|-----------------|------------------|-------|
|                 | Suicide         |                  |       | Suicide         |                  |       | Suicide         |                  |       | Suicide         |                  |       |
|                 | Num<br>per year | Rate<br>/100,000 | × 100 | Num<br>per year | Rate<br>/100,000 | × 100 | Num<br>per year | Rate<br>/100,000 | × 100 | Num<br>per year | Rate<br>/100,000 | × 100 |
|                 |                 |                  |       |                 |                  |       |                 |                  |       |                 |                  |       |
| Total (>10 y/o) | 45–54           | Total (>10 y/o)  | 45–54 |                 |                  |       |                 |                  |       |                 |                  |       |
| 1983–1987       | 22.8            | 32.2             | 99.5  | 4.6             | 42.5             | 84.1  | 12.4            | 15.1             | 98.2  | 2.6             | 18.7             | 108.8 |
| 1988–1992       | 23.2            | 27.6             | 122.7 | 5.0             | 40.6             | 118.1 | 11.2            | 12.3             | 96.1  | 1.8             | 14.6             | 99.6  |
| 1993–1997       | 21.8            | 26.7             | 111.5 | 3.6             | 32.6             | 89.1  | 12.8            | 11.8             | 116.1 | 2.6             | 15.8             | 122.5 |
| 1998–2002       | 29.8            | 37.3             | 106.7 | 7.2             | 58.2             | 104.0 | 12.0            | 12.5             | 99.0  | 2.6             | 17.5             | 116.3 |
| 2003–2007       | 29.2            | 38.3             | 107.3 | 7.0             | 64.9             | 116.0 | 14.2            | 14.1             | 117.1 | 1.4             | 13.7             | 99.9  |
| 2008–2012       | 28.4            | 36.7             | 114.2 | 6.4             | 62.8             | 129.2 | 10.0            | 12.9             | 95.9  | 0.6             | 12.1             | 80.8  |
|                 | 15–24           |                  |       | 55–64           |                  |       | 15–24           |                  |       | 55–64           |                  |       |
| 1983–1987       | 0.8             | 11.7             | 84.0  | 3.8             | 40.5             | 95.4  | 0.8             | 7.3              | 106.2 | 1.8             | 18.1             | 91.5  |
| 1988–1992       | 0.8             | 9.5              | 96.0  | 5.0             | 41.8             | 117.6 | 0.0             | 3.6              | 67.9  | 2.4             | 18.8             | 105.3 |
| 1993–1997       | 1.8             | 14.0             | 123.9 | 4.0             | 38.2             | 94.8  | 0.2             | 4.3              | 82.2  | 2.2             | 16.9             | 106.4 |
| 1998–2002       | 0.2             | 11.4             | 72.4  | 6.0             | 58.8             | 92.6  | 0.4             | 6.5              | 92.2  | 2.2             | 18.5             | 98.5  |
| 2003–2007       | 1.4             | 18.7             | 106.9 | 6.4             | 56.2             | 97.4  | 0.0             | 6.2              | 68.8  | 1.8             | 15.8             | 94.4  |
| 2008–2012       | 0.8             | 19.0             | 89.6  | 7.0             | 54.8             | 112.8 | 0.8             | 10.9             | 111.9 | 1.4             | 13.8             | 92.3  |
|                 | 25–34           |                  |       | 65–74           |                  |       | 25–34           |                  |       | 65–74           |                  |       |
| 1983–1987       | 3.4             | 29.8             | 116.4 | 2.6             | 45.0             | 102.9 | 1.4             | 11.9             | 110.4 | 1.8             | 27.6             | 88.3  |
| 1988–1992       | 1.4             | 17.3             | 90.7  | 4.0             | 49.6             | 140.8 | 0.8             | 8.7              | 100.1 | 2.6             | 28.4             | 108.8 |
| 1993–1997       | 2.8             | 25.5             | 130.6 | 3.8             | 40.9             | 128.2 | 0.8             | 8.5              | 101.8 | 2.0             | 19.6             | 100.6 |
| 1998–2002       | 3.8             | 33.4             | 123.8 | 4.8             | 48.8             | 107.3 | 1.2             | 11.9             | 102.9 | 2.2             | 20.2             | 96.2  |
| 2003–2007       | 2.8             | 31.4             | 101.3 | 4.8             | 47.9             | 111.7 | 1.8             | 15.5             | 119.1 | 3.4             | 24.1             | 129.4 |
| 2008–2012       | 1.8             | 29.5             | 90.6  | 3.2             | 37.2             | 94.1  | 1.0             | 14.1             | 98.4  | 2.4             | 19.3             | 108.6 |
|                 | 35–44           |                  |       | >74 y/o         |                  |       | 35–44           |                  |       | >74 y/o         |                  |       |
| 1983–1987       | 4.8             | 35.6             | 111.8 | 2.8             | 83.8             | 106.9 | 0.8             | 9.4              | 79.5  | 3.2             | 65.8             | 114.0 |
| 1988–1992       | 3.2             | 25.0             | 105.3 | 3.6             | 81.2             | 125.8 | 0.4             | 7.3              | 76.1  | 3.2             | 50.3             | 105.1 |
| 1993–1997       | 3.0             | 26.9             | 109.5 | 2.8             | 57.7             | 110.8 | 1.6             | 11.0             | 129.9 | 3.4             | 41.0             | 119.2 |
| 1998–2002       | 4.4             | 42.9             | 121.7 | 3.4             | 58.0             | 110.0 | 0.8             | 9.7              | 94.2  | 2.6             | 27.4             | 88.4  |
| 2003–2007       | 3.4             | 39.9             | 99.6  | 3.4             | 46.7             | 103.6 | 2.8             | 18.8             | 148.4 | 2.8             | 22.9             | 102.3 |
| 2008–2012       | 4.2             | 41.3             | 110.9 | 5.0             | 52.5             | 126.5 | 1.8             | 15.4             | 113.3 | 2.0             | 15.7             | 81.5  |



Secondary Medical Zone ID: 256

|                 | Male            |                  |       |                 |                  |       | Female          |                  |       |                 |                  |       |
|-----------------|-----------------|------------------|-------|-----------------|------------------|-------|-----------------|------------------|-------|-----------------|------------------|-------|
|                 | Suicide         |                  |       | Suicide         |                  |       | Suicide         |                  |       | Suicide         |                  |       |
|                 | Num<br>per year | Rate<br>/100,000 | × 100 | Num<br>per year | Rate<br>/100,000 | × 100 | Num<br>per year | Rate<br>/100,000 | × 100 | Num<br>per year | Rate<br>/100,000 | × 100 |
|                 |                 |                  |       |                 |                  |       |                 |                  |       |                 |                  |       |
| Total (>10 y/o) | 45–54           | Total (>10 y/o)  | 45–54 |                 |                  |       |                 |                  |       |                 |                  |       |
| 1983–1987       | 16.2            | 33.3             | 103.5 | 3.0             | 46.8             | 92.6  | 9.8             | 15.0             | 96.3  | 2.4             | 21.8             | 126.5 |
| 1988–1992       | 13.4            | 26.0             | 106.2 | 1.8             | 30.9             | 89.9  | 5.2             | 10.7             | 67.5  | 0.2             | 11.3             | 77.4  |
| 1993–1997       | 14.8            | 27.2             | 114.8 | 4.0             | 45.2             | 123.4 | 7.4             | 10.7             | 95.7  | 1.6             | 15.2             | 118.0 |
| 1998–2002       | 17.8            | 37.4             | 103.5 | 4.4             | 60.5             | 108.0 | 7.4             | 12.5             | 91.7  | 1.0             | 14.9             | 98.8  |
| 2003–2007       | 16.8            | 37.5             | 103.2 | 3.6             | 60.5             | 108.2 | 7.6             | 12.7             | 101.6 | 1.0             | 14.6             | 106.4 |
| 2008–2012       | 16.8            | 36.7             | 112.4 | 2.6             | 51.7             | 106.5 | 5.6             | 12.6             | 92.2  | 0.6             | 14.4             | 96.3  |
|                 | 15–24           |                  |       | 55–64           |                  |       | 15–24           |                  |       | 55–64           |                  |       |
| 1983–1987       | 0.6             | 13.6             | 97.9  | 2.0             | 34.1             | 80.2  | 0.4             | 7.0              | 102.1 | 1.2             | 16.8             | 85.2  |
| 1988–1992       | 0.6             | 10.3             | 104.1 | 3.0             | 37.8             | 106.5 | 0.2             | 5.0              | 94.2  | 0.6             | 13.4             | 75.0  |
| 1993–1997       | 0.2             | 9.9              | 88.0  | 3.0             | 42.1             | 104.6 | 0.0             | 4.3              | 81.9  | 1.6             | 17.4             | 109.4 |
| 1998–2002       | 1.2             | 18.8             | 119.0 | 2.2             | 47.0             | 74.0  | 0.2             | 6.7              | 95.2  | 1.8             | 20.3             | 107.7 |
| 2003–2007       | 0.2             | 15.4             | 88.3  | 3.8             | 54.9             | 95.1  | 0.4             | 9.5              | 106.0 | 1.4             | 17.0             | 101.8 |
| 2008–2012       | 1.0             | 23.7             | 111.9 | 5.0             | 58.2             | 119.8 | 0.2             | 9.3              | 95.7  | 1.8             | 17.4             | 116.5 |
|                 | 25–34           |                  |       | 65–74           |                  |       | 25–34           |                  |       | 65–74           |                  |       |
| 1983–1987       | 2.2             | 31.7             | 124.1 | 2.4             | 45.8             | 104.7 | 0.6             | 10.8             | 100.2 | 2.0             | 29.7             | 95.0  |
| 1988–1992       | 2.2             | 30.0             | 156.9 | 1.8             | 33.0             | 93.7  | 0.2             | 7.7              | 88.9  | 0.4             | 13.5             | 51.8  |
| 1993–1997       | 1.2             | 22.5             | 115.1 | 2.4             | 34.4             | 107.9 | 0.2             | 7.6              | 91.4  | 1.4             | 17.8             | 91.3  |
| 1998–2002       | 2.6             | 36.0             | 133.2 | 3.6             | 49.5             | 108.9 | 0.8             | 12.7             | 109.5 | 1.2             | 17.7             | 84.1  |
| 2003–2007       | 2.0             | 35.8             | 115.6 | 2.4             | 40.6             | 94.6  | 0.8             | 14.1             | 108.4 | 1.4             | 18.3             | 98.4  |
| 2008–2012       | 1.8             | 37.0             | 113.5 | 2.6             | 40.6             | 102.8 | 0.2             | 12.9             | 89.8  | 0.8             | 15.5             | 87.3  |
|                 | 35–44           |                  |       | >74 y/o         |                  |       | 35–44           |                  |       | >74 y/o         |                  |       |
| 1983–1987       | 3.0             | 36.9             | 115.9 | 3.0             | 88.3             | 112.7 | 1.2             | 13.0             | 109.8 | 2.0             | 42.2             | 73.2  |
| 1988–1992       | 2.0             | 26.3             | 111.0 | 2.0             | 56.6             | 87.7  | 1.8             | 13.6             | 140.7 | 1.8             | 30.6             | 63.9  |
| 1993–1997       | 1.6             | 26.3             | 107.5 | 2.4             | 54.7             | 105.0 | 0.4             | 8.2              | 96.0  | 2.2             | 28.8             | 83.6  |
| 1998–2002       | 2.6             | 44.1             | 125.2 | 1.2             | 35.7             | 67.6  | 0.8             | 11.7             | 113.5 | 1.6             | 20.7             | 66.5  |
| 2003–2007       | 2.2             | 45.6             | 113.7 | 2.6             | 45.2             | 100.4 | 0.2             | 11.0             | 87.5  | 2.4             | 22.7             | 101.0 |
| 2008–2012       | 2.0             | 38.9             | 104.7 | 1.8             | 34.3             | 82.7  | 0.6             | 13.5             | 99.2  | 1.4             | 15.0             | 77.8  |

Secondary Medical Zone ID: 257

|                 | Male            |                  |       |                 |                  |       | Female          |                  |       |                 |                  |       |
|-----------------|-----------------|------------------|-------|-----------------|------------------|-------|-----------------|------------------|-------|-----------------|------------------|-------|
|                 | Suicide         |                  |       | Suicide         |                  |       | Suicide         |                  |       | Suicide         |                  |       |
|                 | Num<br>per year | Rate<br>/100,000 | × 100 | Num<br>per year | Rate<br>/100,000 | × 100 | Num<br>per year | Rate<br>/100,000 | × 100 | Num<br>per year | Rate<br>/100,000 | × 100 |
|                 |                 |                  |       |                 |                  |       |                 |                  |       |                 |                  |       |
| Total (>10 y/o) | 45–54           | Total (>10 y/o)  | 45–54 |                 |                  |       |                 |                  |       |                 |                  |       |
| 1983–1987       | 41.0            | 35.1             | 111.6 | 8.4             | 47.2             | 93.4  | 23.2            | 16.7             | 115.1 | 5.6             | 24.4             | 141.5 |
| 1988–1992       | 32.4            | 25.9             | 109.6 | 9.8             | 44.7             | 130.2 | 19.0            | 12.9             | 102.1 | 4.4             | 18.1             | 123.8 |
| 1993–1997       | 36.0            | 27.2             | 112.7 | 7.0             | 32.9             | 89.8  | 17.6            | 11.1             | 104.8 | 5.4             | 18.7             | 144.5 |
| 1998–2002       | 49.8            | 36.6             | 107.3 | 9.6             | 48.9             | 87.4  | 17.0            | 11.7             | 89.8  | 1.8             | 11.5             | 76.7  |
| 2003–2007       | 46.4            | 36.8             | 102.2 | 9.2             | 55.1             | 98.5  | 20.8            | 13.0             | 110.0 | 2.6             | 14.3             | 104.4 |
| 2008–2012       | 43.0            | 34.5             | 103.4 | 5.8             | 43.5             | 89.4  | 16.4            | 12.7             | 94.2  | 2.2             | 14.9             | 99.7  |
|                 | 15–24           |                  |       | 55–64           |                  |       | 15–24           |                  |       | 55–64           |                  |       |
| 1983–1987       | 2.6             | 15.3             | 109.6 | 7.8             | 52.8             | 124.1 | 1.4             | 7.6              | 111.7 | 4.2             | 23.7             | 120.4 |
| 1988–1992       | 1.2             | 8.4              | 85.0  | 7.2             | 42.7             | 120.2 | 0.6             | 4.4              | 84.3  | 3.0             | 17.5             | 97.9  |
| 1993–1997       | 2.2             | 12.0             | 105.8 | 8.4             | 46.6             | 115.9 | 0.8             | 5.1              | 97.2  | 2.4             | 14.2             | 89.6  |
| 1998–2002       | 1.8             | 14.3             | 90.8  | 13.4            | 69.0             | 108.5 | 0.2             | 4.9              | 70.3  | 3.0             | 16.7             | 89.0  |
| 2003–2007       | 1.8             | 16.6             | 95.2  | 11.6            | 56.0             | 97.0  | 0.6             | 7.6              | 84.3  | 4.4             | 18.3             | 109.3 |
| 2008–2012       | 1.2             | 16.7             | 78.5  | 9.8             | 49.4             | 101.7 | 0.4             | 7.5              | 77.6  | 2.6             | 13.5             | 90.8  |
|                 | 25–34           |                  |       | 65–74           |                  |       | 25–34           |                  |       | 65–74           |                  |       |
| 1983–1987       | 5.8             | 30.5             | 119.3 | 2.8             | 37.9             | 86.5  | 3.0             | 13.8             | 128.3 | 3.8             | 33.9             | 108.4 |
| 1988–1992       | 1.4             | 12.8             | 67.1  | 3.6             | 37.2             | 105.6 | 1.6             | 9.3              | 107.1 | 3.4             | 26.6             | 101.9 |
| 1993–1997       | 3.0             | 19.8             | 101.3 | 3.8             | 32.5             | 101.9 | 1.2             | 7.9              | 95.3  | 1.4             | 12.7             | 65.4  |
| 1998–2002       | 5.0             | 28.5             | 105.7 | 10.0            | 65.1             | 143.1 | 2.2             | 12.1             | 104.1 | 4.2             | 24.1             | 114.8 |
| 2003–2007       | 5.8             | 33.8             | 109.1 | 7.4             | 48.4             | 112.9 | 2.2             | 13.2             | 101.6 | 3.6             | 20.1             | 107.9 |
| 2008–2012       | 5.6             | 36.7             | 112.7 | 7.0             | 41.1             | 104.0 | 2.0             | 14.6             | 101.8 | 2.8             | 16.3             | 91.5  |
|                 | 35–44           |                  |       | >74 y/o         |                  |       | 35–44           |                  |       | >74 y/o         |                  |       |
| 1983–1987       | 8.6             | 35.2             | 110.5 | 5.0             | 102.7            | 131.1 | 2.8             | 11.5             | 97.8  | 2.4             | 40.3             | 69.8  |
| 1988–1992       | 4.2             | 20.8             | 87.9  | 4.8             | 78.5             | 121.7 | 1.8             | 8.9              | 91.7  | 4.2             | 44.6             | 93.1  |
| 1993–1997       | 7.0             | 35.4             | 144.5 | 4.4             | 62.3             | 119.7 | 2.2             | 10.4             | 122.0 | 4.2             | 35.3             | 102.5 |
| 1998–2002       | 4.6             | 32.0             | 90.8  | 5.4             | 63.8             | 121.0 | 1.8             | 10.9             | 105.4 | 3.8             | 27.2             | 87.5  |
| 2003–2007       | 6.4             | 41.8             | 104.3 | 4.2             | 43.0             | 95.6  | 2.4             | 13.8             | 109.6 | 5.0             | 27.3             | 121.5 |
| 2008–2012       | 7.0             | 39.0             | 104.8 | 6.6             | 51.5             | 124.2 | 3.6             | 16.8             | 123.6 | 2.8             | 15.0             | 78.2  |

Secondary Medical Zone ID: 258

|                 | Male            |                  |       |                 |                  |       | Female          |                  |       |                 |                  |       |
|-----------------|-----------------|------------------|-------|-----------------|------------------|-------|-----------------|------------------|-------|-----------------|------------------|-------|
|                 | Suicide         |                  |       | Suicide         |                  |       | Suicide         |                  |       | Suicide         |                  |       |
|                 | Num<br>per year | Rate<br>/100,000 | × 100 | Num<br>per year | Rate<br>/100,000 | × 100 | Num<br>per year | Rate<br>/100,000 | × 100 | Num<br>per year | Rate<br>/100,000 | × 100 |
|                 |                 |                  |       |                 |                  |       |                 |                  |       |                 |                  |       |
| Total (>10 y/o) | 45–54           | Total (>10 y/o)  | 45–54 |                 |                  |       |                 |                  |       |                 |                  |       |
| 1983–1987       | 47.4            | 36.9             | 119.1 | 11.8            | 59.8             | 118.3 | 23.2            | 15.6             | 102.6 | 6.2             | 24.9             | 144.7 |
| 1988–1992       | 31.4            | 24.0             | 97.6  | 5.6             | 30.2             | 87.9  | 19.2            | 12.0             | 90.9  | 3.0             | 14.4             | 98.5  |
| 1993–1997       | 38.6            | 26.5             | 109.1 | 10.8            | 44.3             | 121.0 | 17.8            | 10.5             | 93.4  | 4.2             | 15.6             | 120.7 |
| 1998–2002       | 57.0            | 38.1             | 108.3 | 14.8            | 61.8             | 110.4 | 26.0            | 13.1             | 110.9 | 4.2             | 16.5             | 109.9 |
| 2003–2007       | 54.4            | 36.9             | 102.0 | 9.4             | 48.1             | 86.0  | 24.4            | 13.1             | 108.7 | 3.2             | 14.6             | 106.6 |
| 2008–2012       | 51.8            | 35.2             | 104.4 | 8.6             | 48.0             | 98.7  | 19.4            | 12.2             | 92.3  | 2.2             | 13.2             | 88.4  |
|                 | 15–24           |                  |       | 55–64           |                  |       | 15–24           |                  |       | 55–64           |                  |       |
| 1983–1987       | 3.2             | 16.3             | 116.8 | 9.6             | 56.1             | 132.0 | 2.2             | 9.1              | 133.7 | 3.8             | 20.2             | 102.4 |
| 1988–1992       | 1.4             | 8.2              | 82.8  | 5.2             | 30.5             | 86.0  | 2.0             | 7.3              | 137.8 | 3.4             | 17.3             | 96.9  |
| 1993–1997       | 3.0             | 12.4             | 110.0 | 9.0             | 46.9             | 116.5 | 1.2             | 5.3              | 102.3 | 2.6             | 13.9             | 87.7  |
| 1998–2002       | 2.2             | 13.0             | 82.5  | 12.6            | 66.3             | 104.4 | 0.4             | 4.6              | 65.7  | 4.4             | 20.0             | 106.1 |
| 2003–2007       | 4.8             | 22.1             | 126.7 | 13.4            | 60.5             | 104.8 | 0.8             | 6.5              | 72.0  | 5.4             | 20.1             | 120.2 |
| 2008–2012       | 3.4             | 20.9             | 98.7  | 11.8            | 50.6             | 104.2 | 1.2             | 8.4              | 86.9  | 5.0             | 18.1             | 121.3 |
|                 | 25–34           |                  |       | 65–74           |                  |       | 25–34           |                  |       | 65–74           |                  |       |
| 1983–1987       | 4.0             | 23.2             | 90.9  | 4.4             | 45.8             | 104.5 | 1.8             | 9.9              | 92.0  | 3.6             | 28.3             | 90.6  |
| 1988–1992       | 3.2             | 19.0             | 99.6  | 4.0             | 36.1             | 102.5 | 1.0             | 7.1              | 82.4  | 2.2             | 17.4             | 66.7  |
| 1993–1997       | 3.4             | 19.5             | 100.0 | 2.4             | 21.5             | 67.3  | 2.2             | 10.2             | 122.2 | 2.6             | 16.1             | 82.9  |
| 1998–2002       | 5.8             | 28.5             | 105.4 | 8.0             | 49.2             | 108.3 | 1.8             | 10.4             | 89.5  | 5.2             | 25.2             | 120.0 |
| 2003–2007       | 8.4             | 38.3             | 123.5 | 6.0             | 38.8             | 90.5  | 2.2             | 12.1             | 93.3  | 5.8             | 25.6             | 137.5 |
| 2008–2012       | 7.4             | 38.4             | 118.0 | 6.0             | 37.4             | 94.7  | 2.6             | 14.8             | 103.1 | 2.8             | 15.7             | 88.3  |
|                 | 35–44           |                  |       | >74 y/o         |                  |       | 35–44           |                  |       | >74 y/o         |                  |       |
| 1983–1987       | 8.4             | 35.5             | 111.6 | 5.8             | 99.4             | 126.9 | 2.4             | 10.8             | 91.7  | 3.2             | 41.1             | 71.2  |
| 1988–1992       | 5.4             | 23.6             | 99.4  | 6.6             | 87.9             | 136.3 | 2.4             | 10.0             | 103.2 | 5.2             | 43.8             | 91.5  |
| 1993–1997       | 4.8             | 24.0             | 97.9  | 5.2             | 62.6             | 120.2 | 1.4             | 7.6              | 88.8  | 3.6             | 25.7             | 74.5  |
| 1998–2002       | 8.2             | 42.0             | 119.2 | 5.2             | 54.4             | 103.1 | 2.4             | 11.5             | 111.4 | 7.4             | 39.3             | 126.4 |
| 2003–2007       | 6.4             | 35.8             | 89.4  | 5.8             | 47.5             | 105.5 | 2.8             | 13.7             | 108.4 | 4.2             | 19.6             | 87.5  |
| 2008–2012       | 7.4             | 36.4             | 98.0  | 7.2             | 47.8             | 115.3 | 1.8             | 11.1             | 82.2  | 3.8             | 15.9             | 82.9  |

Secondary Medical Zone ID: 259

|           | Male            |                  |       |                 |                  |       | Female          |                  |       |                 |                  |       |
|-----------|-----------------|------------------|-------|-----------------|------------------|-------|-----------------|------------------|-------|-----------------|------------------|-------|
|           | Suicide         |                  |       | Suicide         |                  |       | Suicide         |                  |       | Suicide         |                  |       |
|           | Num<br>per year | Rate<br>/100,000 | × 100 | Num<br>per year | Rate<br>/100,000 | × 100 | Num<br>per year | Rate<br>/100,000 | × 100 | Num<br>per year | Rate<br>/100,000 | × 100 |
|           |                 |                  |       |                 |                  |       |                 |                  |       |                 |                  |       |
|           | Total (>10 y/o) |                  |       | 45–54           |                  |       | Total (>10 y/o) |                  |       | 45–54           |                  |       |
| 1983–1987 | 50.0            | 39.6             | 131.0 | 13.2            | 68.5             | 135.4 | 25.0            | 16.7             | 114.9 | 5.0             | 21.7             | 125.8 |
| 1988–1992 | 38.0            | 28.5             | 122.9 | 8.4             | 42.6             | 124.0 | 18.8            | 12.2             | 94.0  | 3.8             | 16.9             | 115.4 |
| 1993–1997 | 32.0            | 25.3             | 99.3  | 7.0             | 34.0             | 92.9  | 17.2            | 10.5             | 96.4  | 3.0             | 13.3             | 102.8 |
| 1998–2002 | 54.4            | 39.1             | 113.5 | 13.8            | 62.6             | 111.9 | 19.0            | 12.2             | 92.2  | 4.0             | 16.7             | 111.0 |
| 2003–2007 | 52.0            | 39.1             | 110.1 | 9.8             | 56.1             | 100.3 | 16.6            | 11.5             | 87.9  | 1.2             | 10.1             | 74.0  |
| 2008–2012 | 47.8            | 37.2             | 110.8 | 8.4             | 54.9             | 112.9 | 22.0            | 14.2             | 111.2 | 3.6             | 19.1             | 127.8 |
|           | 15–24           |                  |       | 55–64           |                  |       | 15–24           |                  |       | 55–64           |                  |       |
| 1983–1987 | 2.2             | 14.0             | 100.2 | 9.0             | 54.1             | 127.3 | 1.4             | 7.5              | 110.1 | 4.0             | 20.8             | 105.6 |
| 1988–1992 | 2.0             | 10.5             | 105.9 | 8.0             | 43.6             | 122.9 | 1.0             | 5.3              | 101.2 | 3.4             | 17.4             | 97.5  |
| 1993–1997 | 2.0             | 11.0             | 97.1  | 6.4             | 38.3             | 95.2  | 0.6             | 4.3              | 83.2  | 4.0             | 18.5             | 116.7 |
| 1998–2002 | 2.8             | 16.1             | 101.7 | 11.2            | 63.2             | 99.5  | 1.2             | 7.3              | 103.3 | 3.0             | 16.8             | 89.4  |
| 2003–2007 | 2.6             | 17.4             | 100.0 | 14.0            | 66.0             | 114.3 | 0.4             | 6.2              | 68.5  | 5.2             | 20.4             | 121.7 |
| 2008–2012 | 2.6             | 20.7             | 97.6  | 9.8             | 47.0             | 96.8  | 1.6             | 11.7             | 120.8 | 4.0             | 16.4             | 110.1 |
|           | 25–34           |                  |       | 65–74           |                  |       | 25–34           |                  |       | 65–74           |                  |       |
| 1983–1987 | 7.0             | 35.2             | 137.6 | 6.2             | 58.2             | 132.9 | 1.0             | 7.8              | 72.7  | 4.8             | 35.6             | 113.9 |
| 1988–1992 | 3.6             | 22.4             | 117.0 | 3.6             | 33.4             | 94.9  | 1.0             | 7.6              | 87.4  | 3.2             | 22.2             | 85.1  |
| 1993–1997 | 3.2             | 20.8             | 106.4 | 4.4             | 33.0             | 103.4 | 1.0             | 7.5              | 90.0  | 2.6             | 16.3             | 83.5  |
| 1998–2002 | 5.8             | 31.9             | 118.2 | 7.2             | 47.8             | 105.2 | 0.8             | 8.5              | 73.3  | 3.8             | 20.6             | 97.8  |
| 2003–2007 | 6.0             | 34.7             | 111.8 | 4.8             | 35.1             | 81.7  | 1.8             | 12.1             | 92.9  | 3.0             | 16.9             | 90.9  |
| 2008–2012 | 4.6             | 32.6             | 100.1 | 6.4             | 40.6             | 102.7 | 2.4             | 15.5             | 108.2 | 3.2             | 17.5             | 98.2  |
|           | 35–44           |                  |       | >74 y/o         |                  |       | 35–44           |                  |       | >74 y/o         |                  |       |
| 1983–1987 | 7.4             | 33.1             | 103.9 | 4.8             | 94.2             | 120.2 | 3.8             | 14.5             | 123.1 | 4.8             | 63.8             | 110.6 |
| 1988–1992 | 5.4             | 24.7             | 104.3 | 7.0             | 96.1             | 149.0 | 1.2             | 7.5              | 78.1  | 5.2             | 47.4             | 99.1  |
| 1993–1997 | 6.0             | 31.1             | 126.7 | 3.0             | 42.2             | 81.1  | 1.4             | 8.0              | 94.5  | 4.6             | 33.5             | 97.2  |
| 1998–2002 | 6.6             | 41.1             | 116.6 | 7.0             | 70.6             | 133.9 | 2.4             | 12.7             | 122.6 | 3.8             | 23.4             | 75.5  |
| 2003–2007 | 7.6             | 48.8             | 121.8 | 7.2             | 58.9             | 130.9 | 1.8             | 12.2             | 96.4  | 3.0             | 15.7             | 70.0  |
| 2008–2012 | 9.2             | 48.8             | 131.2 | 6.6             | 47.8             | 115.3 | 2.2             | 13.5             | 99.3  | 5.0             | 20.4             | 106.0 |

Secondary Medical Zone ID: 260

|                 | Male            |                  |       |                 |                  |       | Female          |                  |       |                 |                  |       |
|-----------------|-----------------|------------------|-------|-----------------|------------------|-------|-----------------|------------------|-------|-----------------|------------------|-------|
|                 | Suicide         |                  |       | Suicide         |                  |       | Suicide         |                  |       | Suicide         |                  |       |
|                 | Num<br>per year | Rate<br>/100,000 | × 100 | Num<br>per year | Rate<br>/100,000 | × 100 | Num<br>per year | Rate<br>/100,000 | × 100 | Num<br>per year | Rate<br>/100,000 | × 100 |
|                 |                 |                  |       |                 |                  |       |                 |                  |       |                 |                  |       |
| Total (>10 y/o) | 45–54           | Total (>10 y/o)  | 45–54 |                 |                  |       |                 |                  |       |                 |                  |       |
| 1983–1987       | 56.2            | 40.5             | 133.3 | 15.0            | 67.6             | 133.7 | 22.6            | 14.5             | 94.5  | 4.0             | 16.9             | 97.8  |
| 1988–1992       | 33.8            | 25.1             | 102.8 | 7.4             | 35.9             | 104.5 | 19.2            | 11.5             | 86.9  | 3.2             | 14.0             | 96.0  |
| 1993–1997       | 39.6            | 26.9             | 112.5 | 9.8             | 41.9             | 114.5 | 16.4            | 9.9              | 84.7  | 4.2             | 15.2             | 117.3 |
| 1998–2002       | 56.4            | 38.6             | 111.1 | 13.4            | 59.8             | 106.8 | 20.0            | 11.6             | 88.9  | 4.6             | 17.4             | 115.5 |
| 2003–2007       | 52.8            | 39.5             | 108.2 | 12.2            | 65.5             | 117.1 | 19.6            | 12.5             | 93.4  | 3.0             | 14.5             | 105.6 |
| 2008–2012       | 50.2            | 37.4             | 112.9 | 9.0             | 56.4             | 116.1 | 19.6            | 13.1             | 96.9  | 2.4             | 14.6             | 98.0  |
|                 | 15–24           |                  |       | 55–64           |                  |       | 15–24           |                  |       | 55–64           |                  |       |
| 1983–1987       | 2.8             | 15.0             | 107.7 | 9.4             | 50.9             | 119.7 | 1.8             | 7.8              | 113.7 | 3.8             | 18.9             | 95.7  |
| 1988–1992       | 1.4             | 8.4              | 84.8  | 8.0             | 39.2             | 110.5 | 1.0             | 5.0              | 94.9  | 3.4             | 16.1             | 89.9  |
| 1993–1997       | 2.8             | 12.3             | 108.7 | 10.0            | 48.1             | 119.5 | 1.4             | 6.1              | 116.5 | 3.6             | 15.7             | 98.5  |
| 1998–2002       | 2.6             | 14.9             | 94.4  | 15.6            | 76.7             | 120.7 | 0.4             | 5.0              | 71.1  | 4.6             | 19.5             | 103.5 |
| 2003–2007       | 1.8             | 14.8             | 84.7  | 13.0            | 60.5             | 104.9 | 1.6             | 10.2             | 113.1 | 4.8             | 18.4             | 109.8 |
| 2008–2012       | 3.0             | 22.5             | 106.2 | 12.8            | 56.3             | 115.8 | 1.4             | 10.7             | 110.8 | 2.8             | 13.2             | 88.7  |
|                 | 25–34           |                  |       | 65–74           |                  |       | 25–34           |                  |       | 65–74           |                  |       |
| 1983–1987       | 7.2             | 34.3             | 134.1 | 5.8             | 54.6             | 124.8 | 2.2             | 10.6             | 98.8  | 4.2             | 30.7             | 98.2  |
| 1988–1992       | 3.0             | 19.3             | 101.1 | 4.4             | 36.8             | 104.5 | 1.8             | 9.3              | 107.5 | 1.6             | 13.7             | 52.7  |
| 1993–1997       | 3.6             | 22.3             | 114.2 | 5.4             | 35.4             | 111.0 | 2.4             | 10.9             | 130.7 | 1.0             | 9.1              | 46.7  |
| 1998–2002       | 6.4             | 34.5             | 127.9 | 8.8             | 50.2             | 110.4 | 1.4             | 9.9              | 85.0  | 2.8             | 15.6             | 74.5  |
| 2003–2007       | 4.8             | 30.9             | 99.8  | 8.2             | 47.0             | 109.4 | 2.0             | 12.5             | 96.1  | 3.2             | 16.1             | 86.6  |
| 2008–2012       | 4.6             | 33.1             | 101.7 | 8.2             | 45.8             | 115.9 | 3.0             | 17.3             | 120.8 | 4.0             | 18.3             | 103.1 |
|                 | 35–44           |                  |       | >74 y/o         |                  |       | 35–44           |                  |       | >74 y/o         |                  |       |
| 1983–1987       | 12.4            | 47.5             | 149.2 | 3.4             | 68.9             | 88.0  | 3.8             | 13.5             | 114.0 | 2.6             | 35.1             | 60.8  |
| 1988–1992       | 6.2             | 26.5             | 112.0 | 3.2             | 51.9             | 80.4  | 2.6             | 10.2             | 105.8 | 5.6             | 46.4             | 96.9  |
| 1993–1997       | 4.2             | 23.1             | 94.3  | 3.8             | 49.0             | 94.0  | 0.6             | 5.6              | 65.3  | 3.2             | 23.0             | 67.0  |
| 1998–2002       | 5.8             | 36.4             | 103.4 | 3.4             | 39.4             | 74.8  | 1.6             | 9.8              | 94.6  | 4.6             | 25.8             | 83.2  |
| 2003–2007       | 8.6             | 53.4             | 133.4 | 4.2             | 36.9             | 81.8  | 2.0             | 12.3             | 97.7  | 3.0             | 14.9             | 66.2  |
| 2008–2012       | 7.0             | 41.0             | 110.2 | 5.6             | 38.7             | 93.3  | 2.2             | 13.2             | 97.6  | 3.8             | 15.4             | 80.2  |

Secondary Medical Zone ID: 261

|                 | Male            |                  |       |                 |                  |       | Female          |                  |       |                 |                  |       |
|-----------------|-----------------|------------------|-------|-----------------|------------------|-------|-----------------|------------------|-------|-----------------|------------------|-------|
|                 | Suicide         |                  |       | Suicide         |                  |       | Suicide         |                  |       | Suicide         |                  |       |
|                 | Num<br>per year | Rate<br>/100,000 | × 100 | Num<br>per year | Rate<br>/100,000 | × 100 | Num<br>per year | Rate<br>/100,000 | × 100 | Num<br>per year | Rate<br>/100,000 | × 100 |
|                 |                 |                  |       |                 |                  |       |                 |                  |       |                 |                  |       |
| Total (>10 y/o) | 45–54           | Total (>10 y/o)  | 45–54 |                 |                  |       |                 |                  |       |                 |                  |       |
| 1983–1987       | 7.2             | 33.2             | 103.1 | 2.4             | 58.9             | 116.4 | 5.4             | 16.0             | 111.7 | 0.6             | 16.9             | 98.0  |
| 1988–1992       | 5.0             | 24.4             | 96.1  | 1.6             | 40.1             | 116.8 | 2.4             | 11.6             | 79.7  | 0.0             | 12.4             | 84.6  |
| 1993–1997       | 7.2             | 26.8             | 118.6 | 2.2             | 44.5             | 121.7 | 1.8             | 9.8              | 78.1  | 0.2             | 11.7             | 90.8  |
| 1998–2002       | 9.4             | 37.8             | 114.1 | 3.8             | 74.9             | 133.8 | 4.2             | 12.9             | 105.2 | 1.0             | 17.0             | 113.2 |
| 2003–2007       | 8.8             | 38.7             | 114.0 | 1.6             | 56.0             | 100.1 | 4.0             | 12.8             | 107.8 | 0.0             | 11.8             | 86.2  |
| 2008–2012       | 5.6             | 34.2             | 95.5  | 0.8             | 46.3             | 95.3  | 3.2             | 13.4             | 101.9 | 0.6             | 16.3             | 109.5 |
|                 | 15–24           |                  |       | 55–64           |                  |       | 15–24           |                  |       | 55–64           |                  |       |
| 1983–1987       | 0.2             | 13.2             | 94.4  | 1.6             | 45.3             | 106.7 | 0.2             | 7.0              | 102.6 | 1.6             | 25.2             | 127.7 |
| 1988–1992       | 0.2             | 9.9              | 99.8  | 0.4             | 27.0             | 76.1  | 0.0             | 4.8              | 90.4  | 0.6             | 17.2             | 96.4  |
| 1993–1997       | 0.4             | 12.1             | 106.7 | 1.8             | 45.2             | 112.4 | 0.0             | 4.7              | 90.9  | 0.4             | 14.6             | 92.0  |
| 1998–2002       | 0.2             | 15.2             | 96.3  | 2.2             | 67.8             | 106.7 | 0.0             | 6.5              | 92.0  | 1.0             | 20.5             | 108.8 |
| 2003–2007       | 0.4             | 18.2             | 104.6 | 2.6             | 66.1             | 114.6 | 0.2             | 9.4              | 104.3 | 0.6             | 16.7             | 99.7  |
| 2008–2012       | 0.2             | 20.9             | 98.7  | 1.8             | 49.4             | 101.7 | 0.8             | 14.3             | 147.4 | 0.4             | 14.3             | 95.9  |
|                 | 25–34           |                  |       | 65–74           |                  |       | 25–34           |                  |       | 65–74           |                  |       |
| 1983–1987       | 1.2             | 29.9             | 116.8 | 0.8             | 42.8             | 97.7  | 0.4             | 11.2             | 104.5 | 0.8             | 30.2             | 96.7  |
| 1988–1992       | 0.6             | 21.2             | 110.9 | 0.2             | 27.0             | 76.6  | 0.0             | 7.7              | 88.8  | 0.4             | 20.9             | 80.0  |
| 1993–1997       | 0.4             | 20.1             | 103.1 | 0.4             | 26.0             | 81.6  | 0.4             | 9.4              | 112.8 | 0.0             | 12.9             | 66.3  |
| 1998–2002       | 1.2             | 32.4             | 120.1 | 0.6             | 37.7             | 82.9  | 0.2             | 11.4             | 98.8  | 0.4             | 18.1             | 86.0  |
| 2003–2007       | 0.2             | 28.0             | 90.2  | 1.2             | 43.0             | 100.1 | 0.2             | 12.8             | 98.3  | 1.6             | 24.7             | 132.8 |
| 2008–2012       | 0.4             | 31.8             | 97.6  | 1.2             | 41.4             | 104.7 | 0.0             | 13.2             | 91.8  | 0.6             | 17.9             | 100.5 |
|                 | 35–44           |                  |       | >74 y/o         |                  |       | 35–44           |                  |       | >74 y/o         |                  |       |
| 1983–1987       | 0.6             | 27.7             | 87.1  | 0.4             | 61.8             | 78.9  | 0.6             | 12.5             | 106.2 | 1.2             | 59.3             | 102.7 |
| 1988–1992       | 1.2             | 26.8             | 113.3 | 0.8             | 62.2             | 96.4  | 0.4             | 9.9              | 102.1 | 1.0             | 42.7             | 89.2  |
| 1993–1997       | 1.0             | 27.4             | 111.9 | 1.0             | 56.6             | 108.7 | 0.0             | 7.3              | 85.4  | 0.8             | 29.5             | 85.8  |
| 1998–2002       | 0.4             | 31.2             | 88.6  | 1.0             | 53.2             | 100.8 | 0.4             | 11.2             | 107.9 | 1.2             | 32.0             | 103.0 |
| 2003–2007       | 1.6             | 52.8             | 131.7 | 1.2             | 47.6             | 105.7 | 0.4             | 13.3             | 105.7 | 1.0             | 23.0             | 102.5 |
| 2008–2012       | 0.8             | 38.4             | 103.1 | 0.4             | 32.4             | 78.0  | 0.0             | 12.4             | 91.4  | 0.8             | 18.2             | 94.6  |

Secondary Medical Zone ID: 262

|                 | Male            |                  |       |                 |                  |       | Female          |                  |       |                 |                  |       |
|-----------------|-----------------|------------------|-------|-----------------|------------------|-------|-----------------|------------------|-------|-----------------|------------------|-------|
|                 | Suicide         |                  |       | Suicide         |                  |       | Suicide         |                  |       | Suicide         |                  |       |
|                 | Num<br>per year | Rate<br>/100,000 | × 100 | Num<br>per year | Rate<br>/100,000 | × 100 | Num<br>per year | Rate<br>/100,000 | × 100 | Num<br>per year | Rate<br>/100,000 | × 100 |
|                 |                 |                  |       |                 |                  |       |                 |                  |       |                 |                  |       |
| Total (>10 y/o) | 45–54           | Total (>10 y/o)  | 45–54 |                 |                  |       |                 |                  |       |                 |                  |       |
| 1983–1987       | 16.6            | 38.1             | 137.9 | 4.4             | 67.3             | 133.0 | 8.0             | 15.7             | 109.0 | 1.4             | 19.0             | 110.1 |
| 1988–1992       | 13.6            | 28.9             | 143.5 | 2.8             | 44.7             | 130.0 | 7.8             | 13.5             | 115.2 | 0.4             | 13.0             | 88.8  |
| 1993–1997       | 10.0            | 26.1             | 113.0 | 2.4             | 40.7             | 111.3 | 6.4             | 11.3             | 113.1 | 1.4             | 15.7             | 121.8 |
| 1998–2002       | 13.4            | 37.0             | 110.6 | 3.8             | 64.1             | 114.6 | 7.0             | 13.0             | 111.8 | 0.8             | 15.1             | 100.2 |
| 2003–2007       | 13.0            | 38.2             | 113.9 | 1.8             | 48.8             | 87.3  | 5.8             | 12.8             | 107.7 | 0.2             | 12.0             | 87.5  |
| 2008–2012       | 12.4            | 36.8             | 118.4 | 2.6             | 58.7             | 120.7 | 3.4             | 12.8             | 90.9  | 0.2             | 13.4             | 89.6  |
|                 | 15–24           |                  |       | 55–64           |                  |       | 15–24           |                  |       | 55–64           |                  |       |
| 1983–1987       | 0.2             | 12.0             | 85.9  | 2.6             | 46.7             | 109.9 | 0.0             | 5.7              | 84.2  | 1.6             | 22.0             | 111.6 |
| 1988–1992       | 0.4             | 10.3             | 103.6 | 4.0             | 53.5             | 150.6 | 0.4             | 6.0              | 114.4 | 1.6             | 20.3             | 113.4 |
| 1993–1997       | 0.4             | 11.5             | 102.1 | 2.4             | 43.5             | 108.1 | 0.0             | 4.5              | 85.5  | 1.6             | 19.5             | 122.9 |
| 1998–2002       | 0.6             | 16.7             | 105.9 | 3.4             | 69.2             | 109.0 | 0.4             | 7.8              | 111.4 | 1.4             | 20.5             | 108.9 |
| 2003–2007       | 0.2             | 16.4             | 94.1  | 3.0             | 60.4             | 104.6 | 0.4             | 10.1             | 112.7 | 0.8             | 16.3             | 97.4  |
| 2008–2012       | 0.0             | 18.8             | 88.5  | 3.0             | 52.4             | 107.9 | 0.2             | 9.9              | 101.8 | 0.2             | 12.7             | 84.8  |
|                 | 25–34           |                  |       | 65–74           |                  |       | 25–34           |                  |       | 65–74           |                  |       |
| 1983–1987       | 2.0             | 32.1             | 125.7 | 2.8             | 62.9             | 143.7 | 0.8             | 12.3             | 114.3 | 2.2             | 39.2             | 125.5 |
| 1988–1992       | 0.0             | 13.6             | 71.0  | 1.8             | 41.6             | 118.1 | 0.2             | 8.1              | 93.9  | 3.2             | 44.5             | 170.5 |
| 1993–1997       | 1.0             | 23.1             | 118.1 | 2.4             | 43.1             | 135.2 | 0.2             | 8.0              | 96.6  | 1.8             | 25.0             | 128.4 |
| 1998–2002       | 0.6             | 25.9             | 96.1  | 2.8             | 51.8             | 113.8 | 0.2             | 10.9             | 94.2  | 1.0             | 19.5             | 92.7  |
| 2003–2007       | 0.8             | 30.5             | 98.3  | 2.2             | 46.0             | 107.2 | 0.6             | 14.1             | 108.6 | 1.0             | 18.4             | 99.0  |
| 2008–2012       | 1.0             | 34.4             | 105.5 | 1.6             | 39.9             | 101.1 | 0.2             | 13.7             | 95.6  | 0.6             | 16.3             | 91.6  |
|                 | 35–44           |                  |       | >74 y/o         |                  |       | 35–44           |                  |       | >74 y/o         |                  |       |
| 1983–1987       | 1.8             | 33.0             | 103.8 | 2.8             | 113.6            | 145.1 | 0.8             | 12.4             | 104.7 | 1.2             | 44.0             | 76.3  |
| 1988–1992       | 2.2             | 30.7             | 129.4 | 2.4             | 87.0             | 134.9 | 0.2             | 8.5              | 87.9  | 1.8             | 45.3             | 94.6  |
| 1993–1997       | 0.6             | 20.5             | 83.6  | 0.8             | 42.5             | 81.6  | 0.0             | 6.8              | 79.8  | 1.4             | 31.2             | 90.6  |
| 1998–2002       | 0.6             | 29.4             | 83.4  | 1.6             | 54.5             | 103.3 | 0.2             | 9.5              | 92.2  | 3.0             | 45.7             | 147.2 |
| 2003–2007       | 2.2             | 54.1             | 135.1 | 2.8             | 61.5             | 136.6 | 0.2             | 11.8             | 93.1  | 2.6             | 33.2             | 148.2 |
| 2008–2012       | 1.6             | 41.2             | 110.8 | 2.6             | 51.5             | 124.0 | 1.2             | 17.0             | 125.4 | 0.8             | 14.9             | 77.7  |

Secondary Medical Zone ID: 263

|           | Male            |          |       |          |          |       | Female          |          |       |          |          |       |
|-----------|-----------------|----------|-------|----------|----------|-------|-----------------|----------|-------|----------|----------|-------|
|           | Suicide         |          |       | Suicide  |          |       | Suicide         |          |       | Suicide  |          |       |
|           | Num             | Rate     | × 100 | Num      | Rate     | × 100 | Num             | Rate     | × 100 | Num      | Rate     | × 100 |
|           | per year        | /100,000 |       | per year | /100,000 |       | per year        | /100,000 |       | per year | /100,000 |       |
|           | Total (>10 y/o) |          |       | 45–54    |          |       | Total (>10 y/o) |          |       | 45–54    |          |       |
| 1983–1987 | 68.4            | 32.6     | 99.2  | 16.6     | 50.0     | 98.9  | 37.6            | 14.9     | 96.7  | 7.8      | 20.4     | 118.3 |
| 1988–1992 | 46.4            | 21.4     | 82.6  | 11.8     | 34.0     | 99.1  | 33.0            | 11.8     | 89.3  | 3.8      | 11.9     | 81.6  |
| 1993–1997 | 50.8            | 21.8     | 83.2  | 11.4     | 29.3     | 80.2  | 27.8            | 9.6      | 83.8  | 5.6      | 13.4     | 103.6 |
| 1998–2002 | 73.4            | 30.0     | 80.6  | 18.0     | 43.8     | 78.2  | 28.0            | 10.4     | 73.2  | 5.0      | 12.7     | 84.3  |
| 2003–2007 | 74.0            | 30.1     | 79.6  | 16.4     | 45.4     | 81.2  | 25.2            | 9.8      | 70.1  | 4.0      | 11.5     | 83.7  |
| 2008–2012 | 69.8            | 30.3     | 82.7  | 14.0     | 45.0     | 92.7  | 29.4            | 11.6     | 81.9  | 3.4      | 11.6     | 77.6  |
|           | 15–24           |          |       | 55–64    |          |       | 15–24           |          |       | 55–64    |          |       |
| 1983–1987 | 5.4             | 16.9     | 121.0 | 7.0      | 28.6     | 67.3  | 4.0             | 9.8      | 144.0 | 6.2      | 19.1     | 96.6  |
| 1988–1992 | 2.0             | 7.5      | 75.5  | 7.8      | 26.1     | 73.4  | 1.8             | 4.9      | 93.4  | 5.2      | 15.3     | 85.5  |
| 1993–1997 | 4.0             | 11.4     | 100.9 | 8.8      | 29.6     | 73.6  | 2.2             | 5.6      | 106.4 | 5.6      | 15.7     | 98.7  |
| 1998–2002 | 4.4             | 14.2     | 89.6  | 14.2     | 45.5     | 71.7  | 0.8             | 4.2      | 59.4  | 7.0      | 19.3     | 102.3 |
| 2003–2007 | 3.6             | 13.9     | 79.8  | 20.0     | 51.4     | 89.1  | 1.0             | 5.3      | 58.4  | 4.8      | 13.4     | 80.0  |
| 2008–2012 | 4.4             | 18.9     | 89.3  | 13.8     | 35.7     | 73.4  | 1.8             | 8.2      | 84.7  | 4.0      | 11.1     | 74.6  |
|           | 25–34           |          |       | 65–74    |          |       | 25–34           |          |       | 65–74    |          |       |
| 1983–1987 | 13.2            | 34.7     | 135.7 | 4.8      | 33.7     | 76.9  | 3.6             | 9.9      | 91.7  | 6.4      | 29.6     | 94.7  |
| 1988–1992 | 6.0             | 19.0     | 99.4  | 5.0      | 28.4     | 80.7  | 3.4             | 9.5      | 109.2 | 6.6      | 25.5     | 97.6  |
| 1993–1997 | 5.4             | 17.8     | 91.2  | 6.2      | 26.8     | 84.0  | 1.8             | 6.4      | 76.8  | 4.6      | 15.6     | 79.9  |
| 1998–2002 | 5.6             | 19.3     | 71.5  | 11.6     | 42.4     | 93.2  | 4.0             | 11.3     | 97.2  | 4.6      | 15.0     | 71.3  |
| 2003–2007 | 7.2             | 23.4     | 75.4  | 8.8      | 33.1     | 77.0  | 2.4             | 8.9      | 68.2  | 4.0      | 13.5     | 72.4  |
| 2008–2012 | 10.0            | 33.4     | 102.6 | 8.8      | 32.3     | 81.8  | 3.8             | 13.3     | 92.8  | 6.4      | 18.7     | 104.9 |
|           | 35–44           |          |       | >74 y/o  |          |       | 35–44           |          |       | >74 y/o  |          |       |
| 1983–1987 | 12.6            | 30.6     | 96.1  | 8.2      | 89.2     | 113.8 | 5.0             | 12.0     | 101.4 | 4.6      | 35.6     | 61.7  |
| 1988–1992 | 9.2             | 21.7     | 91.6  | 4.4      | 43.2     | 66.9  | 5.0             | 10.9     | 113.1 | 7.2      | 37.2     | 77.7  |
| 1993–1997 | 8.6             | 23.1     | 94.1  | 6.0      | 46.9     | 90.1  | 3.6             | 9.0      | 106.1 | 4.4      | 19.3     | 55.9  |
| 1998–2002 | 11.2            | 33.9     | 96.3  | 8.2      | 51.6     | 98.0  | 2.4             | 8.0      | 77.0  | 4.0      | 14.9     | 48.1  |
| 2003–2007 | 10.6            | 33.9     | 84.7  | 7.2      | 36.2     | 80.5  | 4.0             | 12.0     | 95.0  | 4.8      | 13.7     | 61.2  |
| 2008–2012 | 10.0            | 31.3     | 84.2  | 8.6      | 35.0     | 84.4  | 5.2             | 14.1     | 104.3 | 4.6      | 11.6     | 60.3  |



Secondary Medical Zone ID: 264

|           | Male            |                  |       |                 |                  |       | Female          |                  |       |                 |                  |       |
|-----------|-----------------|------------------|-------|-----------------|------------------|-------|-----------------|------------------|-------|-----------------|------------------|-------|
|           | Suicide         |                  |       | Suicide         |                  |       | Suicide         |                  |       | Suicide         |                  |       |
|           | Num<br>per year | Rate<br>/100,000 | × 100 | Num<br>per year | Rate<br>/100,000 | × 100 | Num<br>per year | Rate<br>/100,000 | × 100 | Num<br>per year | Rate<br>/100,000 | × 100 |
|           |                 |                  |       |                 |                  |       |                 |                  |       |                 |                  |       |
|           | Total (>10 y/o) |                  |       | 45–54           |                  |       | Total (>10 y/o) |                  |       | 45–54           |                  |       |
| 1983–1987 | 20.0            | 29.6             | 81.9  | 3.4             | 33.6             | 66.5  | 14.2            | 15.0             | 97.1  | 2.2             | 17.0             | 98.7  |
| 1988–1992 | 15.4            | 21.6             | 80.8  | 3.0             | 28.6             | 83.3  | 12.0            | 12.1             | 91.7  | 1.6             | 14.0             | 95.4  |
| 1993–1997 | 15.6            | 22.4             | 79.5  | 2.8             | 27.9             | 76.1  | 9.8             | 10.4             | 88.3  | 2.8             | 16.4             | 126.7 |
| 1998–2002 | 21.0            | 30.7             | 74.9  | 6.2             | 50.0             | 89.4  | 11.4            | 11.9             | 90.3  | 2.8             | 17.7             | 117.2 |
| 2003–2007 | 21.0            | 31.3             | 75.7  | 5.2             | 49.4             | 88.3  | 9.2             | 11.9             | 84.4  | 1.0             | 11.9             | 87.2  |
| 2008–2012 | 22.4            | 32.5             | 89.9  | 3.6             | 43.6             | 89.7  | 8.6             | 12.5             | 85.9  | 1.6             | 15.7             | 105.4 |
|           | 15–24           |                  |       | 55–64           |                  |       | 15–24           |                  |       | 55–64           |                  |       |
| 1983–1987 | 2.2             | 18.8             | 134.6 | 3.0             | 33.0             | 77.7  | 0.2             | 5.2              | 76.9  | 1.6             | 16.0             | 81.2  |
| 1988–1992 | 0.8             | 9.4              | 94.8  | 2.2             | 24.0             | 67.5  | 0.4             | 4.9              | 92.2  | 1.4             | 14.3             | 80.1  |
| 1993–1997 | 1.4             | 12.4             | 109.6 | 2.6             | 29.0             | 72.0  | 0.2             | 4.3              | 81.6  | 0.4             | 9.4              | 59.4  |
| 1998–2002 | 1.4             | 15.9             | 100.6 | 3.8             | 43.2             | 68.0  | 0.0             | 5.1              | 71.9  | 2.0             | 17.8             | 94.6  |
| 2003–2007 | 0.8             | 15.2             | 87.0  | 5.2             | 46.8             | 81.1  | 0.4             | 7.9              | 87.6  | 2.6             | 18.1             | 108.1 |
| 2008–2012 | 1.0             | 19.4             | 91.3  | 4.4             | 40.3             | 82.9  | 0.4             | 8.8              | 91.0  | 1.8             | 14.5             | 97.3  |
|           | 25–34           |                  |       | 65–74           |                  |       | 25–34           |                  |       | 65–74           |                  |       |
| 1983–1987 | 2.2             | 22.3             | 87.2  | 2.2             | 38.8             | 88.7  | 1.4             | 11.4             | 106.0 | 2.4             | 28.0             | 89.5  |
| 1988–1992 | 1.4             | 17.1             | 89.3  | 2.6             | 35.3             | 100.1 | 1.0             | 9.2              | 106.7 | 1.8             | 20.4             | 78.2  |
| 1993–1997 | 1.4             | 18.2             | 93.3  | 2.6             | 29.4             | 92.0  | 1.4             | 10.6             | 127.2 | 1.4             | 14.8             | 75.9  |
| 1998–2002 | 1.2             | 21.1             | 78.2  | 3.6             | 38.5             | 84.7  | 0.4             | 9.3              | 80.5  | 3.4             | 24.7             | 117.7 |
| 2003–2007 | 3.6             | 35.3             | 114.0 | 2.4             | 30.3             | 70.7  | 1.6             | 14.8             | 113.9 | 1.6             | 16.0             | 85.7  |
| 2008–2012 | 3.0             | 34.9             | 107.2 | 3.4             | 36.6             | 92.5  | 1.0             | 14.1             | 98.8  | 0.8             | 13.3             | 74.6  |
|           | 35–44           |                  |       | >74 y/o         |                  |       | 35–44           |                  |       | >74 y/o         |                  |       |
| 1983–1987 | 5.4             | 37.2             | 117.0 | 1.6             | 51.1             | 65.3  | 2.4             | 14.3             | 121.1 | 4.0             | 63.2             | 109.5 |
| 1988–1992 | 1.4             | 15.7             | 66.3  | 4.0             | 78.1             | 121.0 | 2.2             | 12.3             | 127.3 | 3.6             | 45.0             | 94.0  |
| 1993–1997 | 3.4             | 27.9             | 114.0 | 1.4             | 34.4             | 66.1  | 1.4             | 10.0             | 117.9 | 2.2             | 24.8             | 72.0  |
| 1998–2002 | 3.2             | 34.3             | 97.3  | 1.6             | 34.3             | 65.0  | 1.2             | 11.0             | 106.8 | 1.6             | 17.3             | 55.6  |
| 2003–2007 | 1.6             | 26.6             | 66.3  | 2.2             | 32.9             | 72.9  | 0.8             | 11.4             | 90.4  | 1.2             | 11.6             | 51.7  |
| 2008–2012 | 3.2             | 36.9             | 99.3  | 3.8             | 40.4             | 97.3  | 1.6             | 14.9             | 110.0 | 1.4             | 11.9             | 61.8  |

Secondary Medical Zone ID: 265

|           | Male            |          |       |          |          |       | Female          |          |       |          |          |       |
|-----------|-----------------|----------|-------|----------|----------|-------|-----------------|----------|-------|----------|----------|-------|
|           | Suicide         |          |       | Suicide  |          |       | Suicide         |          |       | Suicide  |          |       |
|           | Num             | Rate     | × 100 | Num      | Rate     | × 100 | Num             | Rate     | × 100 | Num      | Rate     | × 100 |
|           | per year        | /100,000 |       | per year | /100,000 |       | per year        | /100,000 |       | per year | /100,000 |       |
|           | Total (>10 y/o) |          |       | 45–54    |          |       | Total (>10 y/o) |          |       | 45–54    |          |       |
| 1983–1987 | 27.6            | 42.7     | 149.7 | 4.6      | 54.3     | 107.4 | 14.0            | 17.4     | 124.9 | 1.4      | 16.5     | 95.8  |
| 1988–1992 | 22.2            | 31.4     | 153.5 | 5.0      | 54.8     | 159.5 | 15.4            | 15.7     | 146.4 | 2.0      | 18.2     | 124.2 |
| 1993–1997 | 19.4            | 29.8     | 135.5 | 3.6      | 42.8     | 116.9 | 12.2            | 12.5     | 137.7 | 0.0      | 9.5      | 73.8  |
| 1998–2002 | 18.6            | 34.9     | 102.0 | 2.6      | 43.3     | 77.3  | 10.0            | 13.1     | 110.6 | 2.0      | 18.5     | 123.1 |
| 2003–2007 | 22.2            | 40.3     | 123.9 | 4.8      | 63.1     | 112.9 | 8.2             | 12.9     | 105.9 | 2.0      | 18.0     | 131.4 |
| 2008–2012 | 18.4            | 37.3     | 116.8 | 2.2      | 44.9     | 92.4  | 8.4             | 13.2     | 111.8 | 0.8      | 14.8     | 99.0  |
|           | 15–24           |          |       | 55–64    |          |       | 15–24           |          |       | 55–64    |          |       |
| 1983–1987 | 1.6             | 19.2     | 137.7 | 5.4      | 54.5     | 128.4 | 0.6             | 7.6      | 112.0 | 3.0      | 24.2     | 122.8 |
| 1988–1992 | 0.8             | 11.0     | 111.2 | 5.6      | 51.3     | 144.5 | 0.4             | 5.8      | 109.3 | 3.2      | 23.6     | 132.0 |
| 1993–1997 | 0.6             | 11.4     | 100.9 | 3.6      | 43.6     | 108.3 | 0.2             | 5.0      | 96.0  | 2.4      | 20.6     | 129.8 |
| 1998–2002 | 1.0             | 16.9     | 107.1 | 2.6      | 51.9     | 81.7  | 0.0             | 5.8      | 82.7  | 1.6      | 19.9     | 105.9 |
| 2003–2007 | 0.8             | 17.9     | 102.5 | 3.8      | 57.1     | 98.9  | 0.0             | 7.1      | 79.4  | 0.8      | 15.5     | 92.8  |
| 2008–2012 | 1.2             | 24.5     | 115.6 | 5.2      | 57.1     | 117.6 | 0.2             | 9.2      | 94.9  | 1.4      | 16.1     | 108.1 |
|           | 25–34           |          |       | 65–74    |          |       | 25–34           |          |       | 65–74    |          |       |
| 1983–1987 | 4.6             | 42.2     | 165.0 | 1.2      | 33.3     | 76.1  | 1.2             | 12.7     | 118.0 | 2.2      | 32.0     | 102.3 |
| 1988–1992 | 1.8             | 24.1     | 125.8 | 3.2      | 45.6     | 129.4 | 1.2             | 11.5     | 133.0 | 2.8      | 31.7     | 121.5 |
| 1993–1997 | 1.2             | 21.4     | 109.8 | 3.8      | 44.1     | 138.3 | 0.6             | 9.1      | 109.1 | 4.0      | 32.8     | 168.5 |
| 1998–2002 | 1.4             | 28.4     | 105.2 | 5.0      | 56.6     | 124.4 | 0.6             | 11.9     | 102.8 | 3.2      | 27.4     | 130.5 |
| 2003–2007 | 2.8             | 42.0     | 135.4 | 4.4      | 55.7     | 129.8 | 0.8             | 14.3     | 109.9 | 1.6      | 19.0     | 101.9 |
| 2008–2012 | 3.2             | 44.7     | 137.3 | 0.8      | 30.0     | 75.9  | 0.8             | 15.8     | 109.9 | 2.4      | 23.5     | 132.1 |
|           | 35–44           |          |       | >74 y/o  |          |       | 35–44           |          |       | >74 y/o  |          |       |
| 1983–1987 | 5.0             | 50.9     | 160.0 | 5.2      | 139.1    | 177.6 | 2.4             | 18.1     | 153.5 | 3.2      | 66.9     | 116.0 |
| 1988–1992 | 3.4             | 32.7     | 137.8 | 2.4      | 69.2     | 107.3 | 1.2             | 11.4     | 117.7 | 4.6      | 70.1     | 146.5 |
| 1993–1997 | 4.2             | 40.7     | 166.2 | 2.4      | 58.7     | 112.8 | 0.8             | 9.4      | 110.4 | 4.2      | 52.9     | 153.6 |
| 1998–2002 | 2.0             | 35.0     | 99.3  | 4.0      | 72.2     | 137.0 | 0.2             | 8.6      | 83.1  | 2.4      | 28.5     | 91.7  |
| 2003–2007 | 2.0             | 42.0     | 104.9 | 3.6      | 55.1     | 122.3 | 0.4             | 11.8     | 93.3  | 2.6      | 24.0     | 106.8 |
| 2008–2012 | 1.8             | 39.0     | 105.0 | 4.0      | 52.6     | 126.7 | 0.0             | 11.3     | 83.2  | 2.8      | 21.9     | 113.7 |

Secondary Medical Zone ID: 266

|                 | Male            |                  |       |                 |                  |       | Female          |                  |       |                 |                  |       |
|-----------------|-----------------|------------------|-------|-----------------|------------------|-------|-----------------|------------------|-------|-----------------|------------------|-------|
|                 | Suicide         |                  |       | Suicide         |                  |       | Suicide         |                  |       | Suicide         |                  |       |
|                 | Num<br>per year | Rate<br>/100,000 | × 100 | Num<br>per year | Rate<br>/100,000 | × 100 | Num<br>per year | Rate<br>/100,000 | × 100 | Num<br>per year | Rate<br>/100,000 | × 100 |
|                 |                 |                  |       |                 |                  |       |                 |                  |       |                 |                  |       |
| Total (>10 y/o) | 45–54           | Total (>10 y/o)  | 45–54 |                 |                  |       |                 |                  |       |                 |                  |       |
| 1983–1987       | 11.8            | 30.5             | 89.0  | 2.4             | 42.0             | 83.1  | 8.4             | 15.4             | 103.3 | 1.6             | 18.9             | 109.7 |
| 1988–1992       | 10.2            | 24.2             | 94.1  | 1.8             | 30.7             | 89.4  | 9.0             | 13.4             | 113.7 | 1.4             | 16.0             | 109.3 |
| 1993–1997       | 8.4             | 22.9             | 79.6  | 2.4             | 34.9             | 95.4  | 6.8             | 10.9             | 103.1 | 1.8             | 16.0             | 123.9 |
| 1998–2002       | 16.4            | 35.4             | 97.8  | 4.2             | 57.2             | 102.2 | 6.0             | 11.9             | 88.8  | 1.0             | 14.7             | 97.9  |
| 2003–2007       | 17.2            | 37.4             | 104.5 | 3.2             | 54.8             | 98.1  | 5.6             | 11.9             | 90.9  | 1.2             | 15.2             | 111.2 |
| 2008–2012       | 15.0            | 35.4             | 103.1 | 2.0             | 45.3             | 93.3  | 5.2             | 12.9             | 92.1  | 0.8             | 15.1             | 101.0 |
|                 | 15–24           |                  |       | 55–64           |                  |       | 15–24           |                  |       | 55–64           |                  |       |
| 1983–1987       | 0.4             | 11.6             | 83.0  | 2.0             | 38.4             | 90.5  | 0.4             | 6.7              | 98.5  | 0.6             | 15.7             | 79.7  |
| 1988–1992       | 1.4             | 12.7             | 128.8 | 1.2             | 26.7             | 75.1  | 0.2             | 4.7              | 89.8  | 1.4             | 18.4             | 103.1 |
| 1993–1997       | 0.0             | 8.4              | 74.1  | 1.6             | 33.0             | 82.0  | 0.2             | 4.7              | 91.0  | 1.0             | 15.3             | 96.0  |
| 1998–2002       | 1.4             | 17.8             | 112.7 | 4.2             | 64.3             | 101.3 | 0.0             | 5.7              | 80.6  | 0.8             | 16.6             | 88.4  |
| 2003–2007       | 0.8             | 17.4             | 99.8  | 5.4             | 67.9             | 117.7 | 0.2             | 8.1              | 89.5  | 1.2             | 16.5             | 98.6  |
| 2008–2012       | 2.2             | 30.2             | 142.2 | 4.8             | 56.6             | 116.5 | 0.2             | 9.0              | 92.5  | 0.4             | 12.5             | 84.0  |
|                 | 25–34           |                  |       | 65–74           |                  |       | 25–34           |                  |       | 65–74           |                  |       |
| 1983–1987       | 0.8             | 20.8             | 81.3  | 1.2             | 39.8             | 90.8  | 0.2             | 8.7              | 80.8  | 1.2             | 28.2             | 90.3  |
| 1988–1992       | 1.6             | 23.9             | 125.3 | 1.0             | 30.7             | 87.2  | 0.6             | 9.3              | 107.1 | 1.8             | 29.4             | 112.7 |
| 1993–1997       | 0.8             | 18.7             | 95.8  | 1.0             | 25.8             | 81.0  | 0.4             | 8.2              | 98.8  | 0.8             | 16.3             | 83.4  |
| 1998–2002       | 2.0             | 30.7             | 113.6 | 2.4             | 43.7             | 96.0  | 0.4             | 10.8             | 92.8  | 1.2             | 19.6             | 93.2  |
| 2003–2007       | 2.4             | 37.1             | 119.7 | 2.0             | 38.7             | 90.2  | 0.0             | 10.1             | 77.8  | 0.8             | 16.2             | 86.8  |
| 2008–2012       | 1.0             | 30.9             | 94.8  | 2.2             | 38.9             | 98.6  | 1.2             | 17.4             | 121.4 | 0.6             | 15.2             | 85.3  |
|                 | 35–44           |                  |       | >74 y/o         |                  |       | 35–44           |                  |       | >74 y/o         |                  |       |
| 1983–1987       | 3.2             | 37.2             | 117.0 | 1.6             | 75.6             | 96.5  | 1.8             | 15.2             | 128.6 | 2.4             | 67.4             | 116.9 |
| 1988–1992       | 2.0             | 25.5             | 107.7 | 1.2             | 53.9             | 83.6  | 0.6             | 9.3              | 96.7  | 3.0             | 60.9             | 127.2 |
| 1993–1997       | 1.8             | 27.0             | 110.1 | 0.8             | 38.3             | 73.6  | 0.4             | 8.0              | 94.3  | 2.0             | 36.5             | 106.0 |
| 1998–2002       | 0.8             | 26.7             | 75.8  | 1.2             | 42.0             | 79.7  | 0.6             | 10.6             | 102.3 | 2.0             | 30.8             | 99.2  |
| 2003–2007       | 1.8             | 39.1             | 97.6  | 1.6             | 39.2             | 87.1  | 0.4             | 11.6             | 92.1  | 1.8             | 22.9             | 102.0 |
| 2008–2012       | 1.2             | 33.2             | 89.4  | 1.4             | 33.2             | 79.9  | 1.0             | 14.8             | 109.0 | 1.0             | 14.8             | 76.8  |

Secondary Medical Zone ID: 267

|                 | Male            |                  |       |                 |                  |       | Female          |                  |       |                 |                  |       |
|-----------------|-----------------|------------------|-------|-----------------|------------------|-------|-----------------|------------------|-------|-----------------|------------------|-------|
|                 | Suicide         |                  |       | Suicide         |                  |       | Suicide         |                  |       | Suicide         |                  |       |
|                 | Num<br>per year | Rate<br>/100,000 | × 100 | Num<br>per year | Rate<br>/100,000 | × 100 | Num<br>per year | Rate<br>/100,000 | × 100 | Num<br>per year | Rate<br>/100,000 | × 100 |
|                 |                 |                  |       |                 |                  |       |                 |                  |       |                 |                  |       |
| Total (>10 y/o) | 45–54           | Total (>10 y/o)  | 45–54 |                 |                  |       |                 |                  |       |                 |                  |       |
| 1983–1987       | 7.2             | 34.0             | 113.1 | 1.8             | 57.0             | 112.7 | 4.8             | 16.0             | 112.8 | 1.2             | 21.3             | 123.7 |
| 1988–1992       | 6.2             | 26.7             | 119.1 | 0.6             | 31.9             | 92.9  | 3.0             | 12.4             | 94.6  | 0.6             | 15.6             | 106.8 |
| 1993–1997       | 4.2             | 25.0             | 95.1  | 0.8             | 34.8             | 95.2  | 2.0             | 10.3             | 87.3  | 0.0             | 11.3             | 87.4  |
| 1998–2002       | 5.0             | 34.7             | 88.3  | 1.6             | 56.1             | 100.3 | 2.0             | 11.9             | 87.2  | 0.4             | 15.0             | 99.5  |
| 2003–2007       | 4.4             | 34.2             | 83.6  | 0.6             | 44.9             | 80.2  | 2.0             | 12.3             | 92.5  | 0.2             | 13.1             | 95.6  |
| 2008–2012       | 3.4             | 32.6             | 84.9  | 0.6             | 45.3             | 93.2  | 1.6             | 12.5             | 92.0  | 0.2             | 14.4             | 96.8  |
|                 | 15–24           |                  |       | 55–64           |                  |       | 15–24           |                  |       | 55–64           |                  |       |
| 1983–1987       | 0.4             | 15.1             | 108.2 | 1.0             | 40.7             | 95.9  | 0.2             | 7.0              | 103.2 | 0.6             | 19.3             | 97.9  |
| 1988–1992       | 0.2             | 10.0             | 100.6 | 0.8             | 33.3             | 93.9  | 0.2             | 5.7              | 107.2 | 0.4             | 16.7             | 93.8  |
| 1993–1997       | 0.4             | 12.2             | 107.9 | 0.8             | 38.3             | 95.2  | 0.0             | 4.8              | 92.0  | 0.4             | 15.5             | 97.7  |
| 1998–2002       | 0.2             | 15.6             | 98.8  | 0.6             | 52.6             | 82.9  | 0.0             | 6.6              | 93.7  | 0.4             | 18.4             | 97.7  |
| 2003–2007       | 0.2             | 17.4             | 99.9  | 0.4             | 44.0             | 76.2  | 0.0             | 8.4              | 92.9  | 0.4             | 16.5             | 98.3  |
| 2008–2012       | 0.0             | 19.8             | 93.3  | 0.8             | 43.9             | 90.3  | 0.0             | 9.1              | 93.7  | 0.2             | 14.0             | 93.8  |
|                 | 25–34           |                  |       | 65–74           |                  |       | 25–34           |                  |       | 65–74           |                  |       |
| 1983–1987       | 1.0             | 29.2             | 114.1 | 1.4             | 54.1             | 123.6 | 0.8             | 13.8             | 128.3 | 0.2             | 23.5             | 75.3  |
| 1988–1992       | 0.8             | 23.3             | 121.8 | 0.8             | 36.5             | 103.7 | 0.0             | 7.8              | 89.7  | 0.6             | 24.3             | 93.0  |
| 1993–1997       | 0.2             | 18.4             | 94.3  | 0.4             | 27.1             | 85.1  | 0.2             | 8.5              | 102.7 | 0.8             | 21.4             | 109.6 |
| 1998–2002       | 0.4             | 26.7             | 99.0  | 1.0             | 44.2             | 97.3  | 0.0             | 10.7             | 92.3  | 0.6             | 20.6             | 98.1  |
| 2003–2007       | 0.6             | 32.2             | 103.9 | 0.8             | 41.1             | 95.9  | 0.4             | 14.1             | 108.7 | 0.0             | 15.1             | 81.1  |
| 2008–2012       | 0.4             | 32.4             | 99.3  | 0.6             | 37.5             | 95.0  | 0.0             | 13.4             | 93.7  | 0.2             | 16.5             | 92.6  |
|                 | 35–44           |                  |       | >74 y/o         |                  |       | 35–44           |                  |       | >74 y/o         |                  |       |
| 1983–1987       | 1.4             | 36.5             | 114.8 | 0.0             | 49.1             | 62.6  | 0.8             | 14.0             | 118.3 | 1.0             | 57.2             | 99.1  |
| 1988–1992       | 2.6             | 40.2             | 169.7 | 0.4             | 52.3             | 81.0  | 0.2             | 9.4              | 97.0  | 1.0             | 45.7             | 95.5  |
| 1993–1997       | 1.2             | 30.8             | 125.5 | 0.4             | 43.0             | 82.6  | 0.2             | 8.5              | 99.7  | 0.4             | 23.6             | 68.6  |
| 1998–2002       | 0.8             | 36.6             | 104.0 | 0.4             | 42.4             | 80.4  | 0.0             | 9.3              | 89.5  | 0.6             | 24.6             | 79.2  |
| 2003–2007       | 0.8             | 42.3             | 105.5 | 1.0             | 46.0             | 102.2 | 0.4             | 13.6             | 107.3 | 0.6             | 19.3             | 86.1  |
| 2008–2012       | 0.0             | 32.9             | 88.3  | 1.0             | 42.0             | 101.2 | 0.2             | 13.5             | 99.6  | 0.8             | 19.3             | 100.6 |

Secondary Medical Zone ID: 268

|                 | Male            |                  |       |                 |                  |       | Female          |                  |       |                 |                  |       |
|-----------------|-----------------|------------------|-------|-----------------|------------------|-------|-----------------|------------------|-------|-----------------|------------------|-------|
|                 | Suicide         |                  |       | Suicide         |                  |       | Suicide         |                  |       | Suicide         |                  |       |
|                 | Num<br>per year | Rate<br>/100,000 | × 100 | Num<br>per year | Rate<br>/100,000 | × 100 | Num<br>per year | Rate<br>/100,000 | × 100 | Num<br>per year | Rate<br>/100,000 | × 100 |
|                 |                 |                  |       |                 |                  |       |                 |                  |       |                 |                  |       |
| Total (>10 y/o) | 45–54           | Total (>10 y/o)  | 45–54 |                 |                  |       |                 |                  |       |                 |                  |       |
| 1983–1987       | 53.4            | 31.8             | 95.8  | 14.8            | 53.6             | 106.0 | 28.0            | 14.4             | 92.6  | 5.0             | 17.5             | 101.4 |
| 1988–1992       | 45.4            | 24.4             | 98.7  | 11.4            | 38.0             | 110.6 | 25.6            | 11.9             | 90.3  | 4.8             | 15.5             | 106.2 |
| 1993–1997       | 47.2            | 23.9             | 94.1  | 14.2            | 39.7             | 108.6 | 24.0            | 10.4             | 93.0  | 3.4             | 10.9             | 84.8  |
| 1998–2002       | 60.6            | 31.0             | 81.4  | 17.2            | 50.0             | 89.3  | 29.0            | 12.2             | 93.5  | 4.8             | 14.3             | 94.7  |
| 2003–2007       | 70.4            | 34.9             | 92.0  | 18.2            | 60.6             | 108.4 | 29.0            | 12.2             | 96.0  | 3.8             | 13.1             | 95.6  |
| 2008–2012       | 67.2            | 34.1             | 96.8  | 10.2            | 41.4             | 85.1  | 28.2            | 13.1             | 95.4  | 5.8             | 19.2             | 128.4 |
|                 | 15–24           |                  |       | 55–64           |                  |       | 15–24           |                  |       | 55–64           |                  |       |
| 1983–1987       | 4.6             | 17.0             | 122.0 | 7.4             | 36.8             | 86.7  | 1.8             | 6.8              | 99.7  | 3.6             | 16.2             | 82.1  |
| 1988–1992       | 3.2             | 10.6             | 106.9 | 7.8             | 32.4             | 91.4  | 2.4             | 6.9              | 131.1 | 3.6             | 14.8             | 82.7  |
| 1993–1997       | 3.4             | 11.4             | 100.7 | 8.0             | 33.4             | 83.1  | 2.8             | 7.6              | 146.2 | 2.6             | 11.4             | 71.9  |
| 1998–2002       | 5.0             | 17.9             | 113.4 | 12.0            | 47.4             | 74.5  | 1.8             | 7.0              | 99.6  | 5.8             | 19.6             | 104.4 |
| 2003–2007       | 3.4             | 16.1             | 92.3  | 14.6            | 47.1             | 81.7  | 1.4             | 7.4              | 82.8  | 7.8             | 21.0             | 125.1 |
| 2008–2012       | 4.4             | 22.3             | 105.2 | 13.2            | 42.0             | 86.5  | 2.6             | 12.2             | 125.8 | 4.2             | 13.3             | 88.9  |
|                 | 25–34           |                  |       | 65–74           |                  |       | 25–34           |                  |       | 65–74           |                  |       |
| 1983–1987       | 7.8             | 26.6             | 104.0 | 3.6             | 33.9             | 77.5  | 4.6             | 13.6             | 126.7 | 2.8             | 20.5             | 65.7  |
| 1988–1992       | 5.8             | 20.9             | 109.3 | 5.8             | 39.3             | 111.6 | 2.4             | 8.5              | 98.3  | 3.8             | 21.1             | 80.8  |
| 1993–1997       | 6.2             | 21.4             | 109.7 | 4.6             | 26.9             | 84.4  | 3.0             | 9.5              | 114.3 | 3.0             | 14.6             | 74.8  |
| 1998–2002       | 7.0             | 23.6             | 87.6  | 6.2             | 33.4             | 73.4  | 4.0             | 12.1             | 104.6 | 4.4             | 18.4             | 87.4  |
| 2003–2007       | 9.8             | 31.7             | 102.4 | 6.6             | 32.8             | 76.3  | 4.0             | 12.8             | 98.4  | 4.8             | 18.6             | 99.7  |
| 2008–2012       | 8.6             | 33.9             | 104.1 | 8.8             | 38.2             | 96.8  | 3.2             | 13.1             | 91.3  | 4.4             | 17.0             | 95.6  |
|                 | 35–44           |                  |       | >74 y/o         |                  |       | 35–44           |                  |       | >74 y/o         |                  |       |
| 1983–1987       | 9.6             | 27.4             | 86.1  | 5.2             | 75.2             | 96.0  | 5.6             | 14.1             | 119.7 | 4.2             | 41.8             | 72.4  |
| 1988–1992       | 7.6             | 21.6             | 91.3  | 3.6             | 46.4             | 71.9  | 3.2             | 9.2              | 94.9  | 5.4             | 38.5             | 80.5  |
| 1993–1997       | 6.8             | 22.6             | 92.1  | 4.0             | 42.4             | 81.4  | 3.0             | 9.2              | 108.6 | 6.0             | 33.8             | 98.3  |
| 1998–2002       | 9.0             | 32.6             | 92.4  | 4.2             | 37.9             | 72.0  | 3.0             | 10.4             | 101.0 | 5.0             | 23.7             | 76.3  |
| 2003–2007       | 11.4            | 40.0             | 99.8  | 6.0             | 38.9             | 86.4  | 3.0             | 11.2             | 88.9  | 4.2             | 16.2             | 72.2  |
| 2008–2012       | 14.4            | 43.7             | 117.4 | 7.2             | 38.3             | 92.4  | 3.8             | 12.6             | 92.7  | 4.2             | 14.2             | 73.9  |

Secondary Medical Zone ID: 269

|           | Male            |                  |       |                 |                  |       | Female          |                  |       |                 |                  |       |
|-----------|-----------------|------------------|-------|-----------------|------------------|-------|-----------------|------------------|-------|-----------------|------------------|-------|
|           | Suicide         |                  |       | Suicide         |                  |       | Suicide         |                  |       | Suicide         |                  |       |
|           | Num<br>per year | Rate<br>/100,000 | × 100 | Num<br>per year | Rate<br>/100,000 | × 100 | Num<br>per year | Rate<br>/100,000 | × 100 | Num<br>per year | Rate<br>/100,000 | × 100 |
|           |                 |                  |       |                 |                  |       |                 |                  |       |                 |                  |       |
|           | Total (>10 y/o) |                  |       | 45–54           |                  |       | Total (>10 y/o) |                  |       | 45–54           |                  |       |
| 1983–1987 | 47.8            | 37.1             | 116.8 | 10.8            | 56.1             | 110.9 | 19.8            | 13.9             | 87.4  | 1.6             | 11.8             | 68.4  |
| 1988–1992 | 37.2            | 26.6             | 111.7 | 6.6             | 34.0             | 99.1  | 20.4            | 12.5             | 94.1  | 3.0             | 14.8             | 101.0 |
| 1993–1997 | 36.8            | 25.8             | 104.0 | 11.2            | 44.9             | 122.8 | 18.0            | 10.2             | 94.1  | 3.0             | 12.9             | 100.1 |
| 1998–2002 | 44.4            | 33.1             | 87.2  | 13.4            | 57.0             | 101.8 | 17.8            | 11.4             | 82.9  | 3.0             | 13.8             | 91.7  |
| 2003–2007 | 44.4            | 32.3             | 86.8  | 7.6             | 42.2             | 75.4  | 17.0            | 11.6             | 84.9  | 2.2             | 12.3             | 90.0  |
| 2008–2012 | 46.0            | 34.0             | 98.0  | 7.6             | 47.1             | 96.9  | 16.0            | 11.6             | 84.7  | 2.4             | 14.5             | 97.2  |
|           | 15–24           |                  |       | 55–64           |                  |       | 15–24           |                  |       | 55–64           |                  |       |
| 1983–1987 | 3.8             | 20.3             | 145.2 | 6.8             | 41.3             | 97.2  | 1.4             | 7.4              | 108.7 | 3.8             | 19.5             | 99.0  |
| 1988–1992 | 2.2             | 10.7             | 108.1 | 7.6             | 39.5             | 111.3 | 2.2             | 8.1              | 153.7 | 2.4             | 14.1             | 79.0  |
| 1993–1997 | 2.2             | 11.2             | 99.4  | 7.2             | 39.7             | 98.5  | 0.8             | 4.6              | 89.0  | 2.8             | 14.7             | 92.2  |
| 1998–2002 | 3.0             | 16.7             | 105.8 | 10.6            | 57.8             | 91.0  | 1.0             | 6.5              | 93.0  | 2.8             | 16.2             | 85.9  |
| 2003–2007 | 2.0             | 15.5             | 88.9  | 10.6            | 49.6             | 85.9  | 0.8             | 7.4              | 82.7  | 2.6             | 13.8             | 82.4  |
| 2008–2012 | 2.8             | 21.4             | 100.8 | 11.8            | 50.5             | 103.9 | 0.8             | 8.3              | 85.6  | 2.0             | 11.5             | 77.2  |
|           | 25–34           |                  |       | 65–74           |                  |       | 25–34           |                  |       | 65–74           |                  |       |
| 1983–1987 | 6.4             | 32.0             | 125.0 | 3.6             | 37.8             | 86.3  | 2.4             | 11.9             | 110.2 | 3.0             | 23.8             | 76.2  |
| 1988–1992 | 4.2             | 23.8             | 124.3 | 5.2             | 41.8             | 118.5 | 1.6             | 9.1              | 105.0 | 3.4             | 22.2             | 85.1  |
| 1993–1997 | 2.2             | 15.8             | 80.9  | 4.0             | 28.8             | 90.3  | 1.2             | 7.8              | 93.5  | 2.0             | 13.3             | 68.1  |
| 1998–2002 | 5.8             | 29.5             | 109.3 | 4.0             | 30.6             | 67.4  | 1.8             | 10.6             | 91.7  | 2.2             | 14.4             | 68.6  |
| 2003–2007 | 6.4             | 32.6             | 105.2 | 7.4             | 45.0             | 105.0 | 2.6             | 13.4             | 103.2 | 3.4             | 18.1             | 97.2  |
| 2008–2012 | 6.2             | 35.9             | 110.1 | 6.4             | 39.1             | 99.0  | 1.6             | 12.3             | 86.1  | 3.6             | 18.7             | 104.8 |
|           | 35–44           |                  |       | >74 y/o         |                  |       | 35–44           |                  |       | >74 y/o         |                  |       |
| 1983–1987 | 10.0            | 39.8             | 125.2 | 6.2             | 93.5             | 119.4 | 1.8             | 9.5              | 80.8  | 5.6             | 59.2             | 102.6 |
| 1988–1992 | 5.6             | 23.9             | 100.9 | 5.8             | 72.1             | 111.7 | 3.0             | 11.3             | 117.5 | 4.8             | 38.3             | 79.9  |
| 1993–1997 | 6.4             | 30.4             | 124.2 | 3.4             | 42.2             | 80.9  | 1.8             | 8.8              | 103.5 | 6.4             | 39.9             | 115.9 |
| 1998–2002 | 4.4             | 28.6             | 81.1  | 3.2             | 36.2             | 68.7  | 1.8             | 10.3             | 99.8  | 5.0             | 27.1             | 87.3  |
| 2003–2007 | 4.8             | 31.3             | 78.2  | 5.4             | 42.3             | 93.9  | 2.0             | 12.2             | 96.9  | 3.4             | 16.2             | 72.1  |
| 2008–2012 | 6.6             | 35.8             | 96.3  | 4.6             | 33.0             | 79.6  | 2.0             | 12.2             | 90.0  | 3.6             | 15.2             | 78.9  |

Secondary Medical Zone ID: 270

|                 | Male            |                  |       |                 |                  |       | Female          |                  |       |                 |                  |       |
|-----------------|-----------------|------------------|-------|-----------------|------------------|-------|-----------------|------------------|-------|-----------------|------------------|-------|
|                 | Suicide         |                  |       | Suicide         |                  |       | Suicide         |                  |       | Suicide         |                  |       |
|                 | Num<br>per year | Rate<br>/100,000 | × 100 | Num<br>per year | Rate<br>/100,000 | × 100 | Num<br>per year | Rate<br>/100,000 | × 100 | Num<br>per year | Rate<br>/100,000 | × 100 |
|                 |                 |                  |       |                 |                  |       |                 |                  |       |                 |                  |       |
| Total (>10 y/o) | 45–54           | Total (>10 y/o)  | 45–54 |                 |                  |       |                 |                  |       |                 |                  |       |
| 1983–1987       | 20.0            | 32.6             | 97.7  | 4.8             | 50.9             | 100.6 | 10.6            | 14.2             | 90.0  | 1.4             | 15.8             | 91.5  |
| 1988–1992       | 14.2            | 23.2             | 88.7  | 2.8             | 32.4             | 94.5  | 10.0            | 12.2             | 91.9  | 0.8             | 12.5             | 85.8  |
| 1993–1997       | 14.4            | 23.9             | 87.7  | 4.0             | 37.6             | 102.8 | 9.0             | 10.4             | 95.3  | 1.0             | 11.8             | 91.4  |
| 1998–2002       | 21.6            | 35.5             | 90.8  | 5.6             | 54.2             | 96.8  | 7.4             | 11.0             | 78.7  | 1.8             | 15.8             | 105.1 |
| 2003–2007       | 20.0            | 34.4             | 86.0  | 3.4             | 43.6             | 78.0  | 5.4             | 10.6             | 71.7  | 0.8             | 12.1             | 88.0  |
| 2008–2012       | 16.0            | 31.7             | 80.9  | 4.2             | 51.7             | 106.3 | 7.8             | 12.5             | 90.8  | 2.0             | 18.3             | 122.6 |
|                 | 15–24           |                  |       | 55–64           |                  |       | 15–24           |                  |       | 55–64           |                  |       |
| 1983–1987       | 1.2             | 14.8             | 105.9 | 2.4             | 33.5             | 78.7  | 0.8             | 7.7              | 112.3 | 2.6             | 22.0             | 111.7 |
| 1988–1992       | 1.4             | 11.9             | 120.3 | 3.6             | 36.6             | 103.1 | 0.4             | 5.1              | 96.8  | 1.6             | 16.5             | 92.5  |
| 1993–1997       | 0.2             | 8.7              | 76.7  | 3.2             | 37.6             | 93.4  | 0.0             | 3.8              | 72.2  | 1.4             | 15.0             | 94.3  |
| 1998–2002       | 1.0             | 15.1             | 95.4  | 6.0             | 66.7             | 105.0 | 0.2             | 6.0              | 85.3  | 0.8             | 15.1             | 80.1  |
| 2003–2007       | 1.4             | 18.9             | 108.2 | 5.0             | 52.7             | 91.2  | 0.4             | 8.3              | 92.6  | 1.6             | 16.3             | 97.5  |
| 2008–2012       | 0.8             | 19.2             | 90.6  | 2.6             | 36.2             | 74.5  | 0.2             | 8.1              | 83.9  | 2.8             | 18.7             | 125.7 |
|                 | 25–34           |                  |       | 65–74           |                  |       | 25–34           |                  |       | 65–74           |                  |       |
| 1983–1987       | 2.8             | 28.9             | 113.1 | 1.4             | 32.7             | 74.7  | 0.8             | 10.1             | 93.7  | 1.6             | 24.7             | 79.2  |
| 1988–1992       | 1.6             | 19.9             | 104.3 | 0.6             | 20.7             | 58.8  | 1.2             | 10.6             | 122.5 | 2.2             | 25.3             | 96.9  |
| 1993–1997       | 1.6             | 20.6             | 105.5 | 1.6             | 25.2             | 79.0  | 0.6             | 8.3              | 99.4  | 2.4             | 22.2             | 114.1 |
| 1998–2002       | 3.0             | 32.0             | 118.4 | 1.4             | 29.2             | 64.1  | 1.2             | 12.8             | 110.5 | 1.2             | 16.2             | 77.0  |
| 2003–2007       | 2.6             | 32.4             | 104.5 | 2.0             | 32.4             | 75.5  | 0.0             | 9.1              | 69.8  | 1.2             | 15.9             | 85.3  |
| 2008–2012       | 1.4             | 28.5             | 87.4  | 1.6             | 30.4             | 76.9  | 0.8             | 13.8             | 96.1  | 0.4             | 12.9             | 72.7  |
|                 | 35–44           |                  |       | >74 y/o         |                  |       | 35–44           |                  |       | >74 y/o         |                  |       |
| 1983–1987       | 3.8             | 34.0             | 107.0 | 3.6             | 91.6             | 117.0 | 1.4             | 12.4             | 104.9 | 1.8             | 38.6             | 67.0  |
| 1988–1992       | 2.4             | 23.1             | 97.4  | 1.8             | 48.7             | 75.5  | 1.2             | 10.3             | 106.2 | 2.4             | 36.9             | 77.1  |
| 1993–1997       | 2.8             | 28.1             | 114.6 | 1.0             | 30.8             | 59.2  | 0.8             | 8.6              | 101.0 | 2.8             | 33.4             | 97.1  |
| 1998–2002       | 3.8             | 42.4             | 120.4 | 0.6             | 25.4             | 48.1  | 0.0             | 7.0              | 67.7  | 2.2             | 24.1             | 77.5  |
| 2003–2007       | 3.4             | 43.9             | 109.5 | 2.2             | 35.8             | 79.6  | 0.2             | 9.8              | 77.4  | 1.2             | 13.2             | 58.9  |
| 2008–2012       | 2.8             | 36.9             | 99.1  | 2.6             | 35.7             | 86.0  | 0.4             | 11.4             | 83.9  | 1.2             | 12.5             | 65.1  |

Secondary Medical Zone ID: 271

|                 | Male            |                  |       |                 |                  |       | Female          |                  |       |                 |                  |       |
|-----------------|-----------------|------------------|-------|-----------------|------------------|-------|-----------------|------------------|-------|-----------------|------------------|-------|
|                 | Suicide         |                  |       | Suicide         |                  |       | Suicide         |                  |       | Suicide         |                  |       |
|                 | Num<br>per year | Rate<br>/100,000 | × 100 | Num<br>per year | Rate<br>/100,000 | × 100 | Num<br>per year | Rate<br>/100,000 | × 100 | Num<br>per year | Rate<br>/100,000 | × 100 |
|                 |                 |                  |       |                 |                  |       |                 |                  |       |                 |                  |       |
| Total (>10 y/o) | 45–54           | Total (>10 y/o)  | 45–54 |                 |                  |       |                 |                  |       |                 |                  |       |
| 1983–1987       | 15.6            | 35.0             | 115.2 | 3.6             | 54.4             | 107.6 | 6.2             | 14.5             | 90.7  | 1.2             | 17.6             | 102.1 |
| 1988–1992       | 14.0            | 27.9             | 124.5 | 3.0             | 40.8             | 118.6 | 6.4             | 12.4             | 96.9  | 0.8             | 14.1             | 96.2  |
| 1993–1997       | 13.6            | 27.2             | 116.1 | 4.6             | 48.8             | 133.5 | 5.4             | 10.5             | 94.6  | 0.4             | 11.0             | 85.0  |
| 1998–2002       | 20.2            | 38.2             | 118.2 | 5.8             | 67.8             | 121.2 | 5.4             | 11.8             | 87.6  | 0.6             | 13.3             | 88.0  |
| 2003–2007       | 18.6            | 37.5             | 111.4 | 2.2             | 42.4             | 75.8  | 6.4             | 12.7             | 99.6  | 1.4             | 15.8             | 115.4 |
| 2008–2012       | 15.4            | 34.8             | 102.8 | 3.0             | 50.8             | 104.6 | 6.2             | 13.1             | 99.9  | 1.0             | 15.7             | 105.3 |
|                 | 15–24           |                  |       | 55–64           |                  |       | 15–24           |                  |       | 55–64           |                  |       |
| 1983–1987       | 1.0             | 15.6             | 112.2 | 1.6             | 36.7             | 86.5  | 0.2             | 6.1              | 89.8  | 1.4             | 20.6             | 104.6 |
| 1988–1992       | 0.6             | 10.0             | 100.7 | 3.0             | 43.0             | 121.1 | 0.2             | 4.9              | 93.3  | 1.6             | 20.0             | 112.2 |
| 1993–1997       | 0.6             | 11.2             | 99.1  | 2.4             | 40.4             | 100.3 | 0.4             | 5.7              | 109.0 | 1.0             | 15.8             | 99.6  |
| 1998–2002       | 1.2             | 18.0             | 114.0 | 4.2             | 67.5             | 106.2 | 0.4             | 7.3              | 104.5 | 0.6             | 16.3             | 86.4  |
| 2003–2007       | 0.6             | 16.6             | 95.3  | 3.8             | 57.1             | 98.8  | 0.2             | 8.2              | 91.1  | 0.6             | 14.7             | 87.5  |
| 2008–2012       | 0.6             | 20.1             | 94.7  | 5.8             | 62.3             | 128.2 | 0.2             | 8.9              | 92.0  | 0.4             | 12.5             | 84.1  |
|                 | 25–34           |                  |       | 65–74           |                  |       | 25–34           |                  |       | 65–74           |                  |       |
| 1983–1987       | 3.2             | 35.7             | 139.5 | 2.4             | 58.6             | 133.8 | 0.4             | 9.3              | 86.7  | 0.8             | 26.1             | 83.6  |
| 1988–1992       | 2.0             | 25.3             | 132.3 | 1.2             | 34.3             | 97.4  | 0.4             | 8.2              | 94.8  | 0.8             | 21.3             | 81.8  |
| 1993–1997       | 2.4             | 27.6             | 141.1 | 1.0             | 27.4             | 86.0  | 0.2             | 7.3              | 87.4  | 1.2             | 20.1             | 102.9 |
| 1998–2002       | 1.8             | 27.9             | 103.3 | 3.2             | 53.3             | 117.2 | 0.8             | 12.1             | 104.7 | 1.4             | 21.8             | 103.7 |
| 2003–2007       | 3.0             | 38.5             | 124.1 | 3.6             | 55.6             | 129.5 | 1.0             | 14.3             | 109.9 | 0.8             | 16.8             | 90.4  |
| 2008–2012       | 1.8             | 33.4             | 102.5 | 0.8             | 30.5             | 77.1  | 1.8             | 19.6             | 136.6 | 1.2             | 18.5             | 103.9 |
|                 | 35–44           |                  |       | >74 y/o         |                  |       | 35–44           |                  |       | >74 y/o         |                  |       |
| 1983–1987       | 2.2             | 30.8             | 96.8  | 1.6             | 80.8             | 103.1 | 0.4             | 10.1             | 85.3  | 1.8             | 60.7             | 105.3 |
| 1988–1992       | 3.0             | 30.9             | 130.5 | 1.2             | 59.0             | 91.5  | 0.8             | 10.0             | 103.2 | 1.8             | 47.8             | 99.9  |
| 1993–1997       | 1.4             | 22.8             | 93.0  | 1.2             | 49.7             | 95.5  | 0.8             | 9.5              | 112.1 | 1.4             | 32.0             | 92.9  |
| 1998–2002       | 1.6             | 31.6             | 89.7  | 2.4             | 64.8             | 122.9 | 0.2             | 8.6              | 83.1  | 1.4             | 26.9             | 86.7  |
| 2003–2007       | 2.8             | 45.6             | 113.9 | 2.6             | 56.2             | 124.9 | 0.8             | 13.1             | 103.6 | 1.6             | 22.9             | 102.0 |
| 2008–2012       | 1.4             | 32.9             | 88.4  | 2.0             | 42.7             | 103.0 | 0.2             | 11.4             | 84.4  | 1.4             | 18.5             | 96.2  |



Secondary Medical Zone ID: 272

|           | Male            |                  |       |                 |                  |       | Female          |                  |       |                 |                  |       |
|-----------|-----------------|------------------|-------|-----------------|------------------|-------|-----------------|------------------|-------|-----------------|------------------|-------|
|           | Suicide         |                  |       | Suicide         |                  |       | Suicide         |                  |       | Suicide         |                  |       |
|           | Num<br>per year | Rate<br>/100,000 | × 100 | Num<br>per year | Rate<br>/100,000 | × 100 | Num<br>per year | Rate<br>/100,000 | × 100 | Num<br>per year | Rate<br>/100,000 | × 100 |
|           |                 |                  |       |                 |                  |       |                 |                  |       |                 |                  |       |
|           | Total (>10 y/o) |                  |       | 45–54           |                  |       | Total (>10 y/o) |                  |       | 45–54           |                  |       |
| 1983–1987 | 32.8            | 33.1             | 99.2  | 8.8             | 54.6             | 108.0 | 18.0            | 15.1             | 96.6  | 3.0             | 17.0             | 98.9  |
| 1988–1992 | 29.6            | 26.2             | 109.1 | 7.4             | 42.5             | 123.7 | 13.2            | 11.2             | 79.8  | 2.2             | 13.7             | 93.8  |
| 1993–1997 | 25.8            | 24.2             | 92.0  | 7.4             | 39.1             | 106.8 | 14.4            | 10.5             | 94.2  | 3.2             | 15.0             | 115.9 |
| 1998–2002 | 37.2            | 33.5             | 91.1  | 10.4            | 56.9             | 101.6 | 15.8            | 12.4             | 90.2  | 3.8             | 17.6             | 117.0 |
| 2003–2007 | 42.8            | 37.7             | 103.8 | 8.4             | 54.9             | 98.1  | 15.2            | 12.6             | 92.5  | 1.4             | 11.4             | 83.1  |
| 2008–2012 | 36.8            | 34.2             | 98.6  | 5.0             | 40.3             | 83.0  | 14.6            | 12.7             | 92.7  | 1.4             | 12.6             | 84.3  |
|           | 15–24           |                  |       | 55–64           |                  |       | 15–24           |                  |       | 55–64           |                  |       |
| 1983–1987 | 2.0             | 14.6             | 104.6 | 3.4             | 29.8             | 70.0  | 1.4             | 8.2              | 119.3 | 1.6             | 13.8             | 69.9  |
| 1988–1992 | 1.8             | 11.1             | 112.2 | 6.8             | 41.6             | 117.2 | 0.6             | 4.9              | 92.5  | 2.6             | 16.1             | 90.4  |
| 1993–1997 | 2.2             | 13.2             | 116.9 | 5.6             | 38.2             | 95.0  | 0.6             | 4.9              | 94.7  | 1.2             | 10.7             | 67.0  |
| 1998–2002 | 2.6             | 18.5             | 117.4 | 8.4             | 57.1             | 89.9  | 0.8             | 7.0              | 100.0 | 3.6             | 20.0             | 106.1 |
| 2003–2007 | 2.2             | 19.2             | 110.0 | 9.4             | 54.6             | 94.6  | 1.8             | 12.8             | 142.2 | 3.2             | 17.0             | 101.5 |
| 2008–2012 | 1.6             | 19.7             | 92.8  | 9.8             | 53.0             | 109.2 | 1.0             | 10.6             | 108.8 | 3.6             | 16.9             | 113.3 |
|           | 25–34           |                  |       | 65–74           |                  |       | 25–34           |                  |       | 65–74           |                  |       |
| 1983–1987 | 5.8             | 33.8             | 132.2 | 1.6             | 27.4             | 62.6  | 2.4             | 12.8             | 118.9 | 4.4             | 37.7             | 120.6 |
| 1988–1992 | 2.0             | 16.2             | 84.8  | 3.0             | 31.7             | 90.0  | 1.0             | 7.9              | 90.8  | 1.4             | 15.1             | 58.0  |
| 1993–1997 | 3.0             | 20.8             | 106.6 | 1.6             | 18.8             | 59.0  | 1.4             | 9.0              | 108.7 | 2.0             | 15.1             | 77.5  |
| 1998–2002 | 3.8             | 26.4             | 97.9  | 5.0             | 40.1             | 88.2  | 1.6             | 11.4             | 98.3  | 2.2             | 16.1             | 76.7  |
| 2003–2007 | 4.2             | 29.8             | 96.2  | 6.2             | 45.7             | 106.6 | 1.0             | 10.4             | 79.9  | 2.6             | 17.0             | 91.5  |
| 2008–2012 | 5.0             | 36.0             | 110.4 | 6.0             | 42.8             | 108.4 | 1.6             | 13.9             | 96.8  | 1.8             | 14.5             | 81.7  |
|           | 35–44           |                  |       | >74 y/o         |                  |       | 35–44           |                  |       | >74 y/o         |                  |       |
| 1983–1987 | 9.0             | 42.6             | 133.8 | 2.0             | 52.9             | 67.6  | 2.2             | 11.5             | 97.8  | 3.0             | 45.5             | 78.9  |
| 1988–1992 | 5.2             | 26.5             | 112.0 | 3.4             | 58.8             | 91.2  | 1.8             | 9.6              | 99.0  | 3.6             | 39.7             | 83.0  |
| 1993–1997 | 4.2             | 26.0             | 106.0 | 1.8             | 32.1             | 61.6  | 2.0             | 10.3             | 121.0 | 4.0             | 33.8             | 98.3  |
| 1998–2002 | 3.0             | 25.6             | 72.6  | 4.0             | 48.2             | 91.4  | 2.0             | 11.9             | 115.0 | 1.8             | 15.4             | 49.7  |
| 2003–2007 | 7.2             | 48.2             | 120.3 | 5.0             | 46.5             | 103.3 | 2.6             | 15.2             | 120.2 | 2.4             | 14.9             | 66.3  |
| 2008–2012 | 6.2             | 39.4             | 106.0 | 3.2             | 30.7             | 73.9  | 2.4             | 14.7             | 108.3 | 2.8             | 14.7             | 76.6  |

Secondary Medical Zone ID: 273

|                 | Male            |                  |       |                 |                  |       | Female          |                  |       |                 |                  |       |
|-----------------|-----------------|------------------|-------|-----------------|------------------|-------|-----------------|------------------|-------|-----------------|------------------|-------|
|                 | Suicide         |                  |       | Suicide         |                  |       | Suicide         |                  |       | Suicide         |                  |       |
|                 | Num<br>per year | Rate<br>/100,000 | × 100 | Num<br>per year | Rate<br>/100,000 | × 100 | Num<br>per year | Rate<br>/100,000 | × 100 | Num<br>per year | Rate<br>/100,000 | × 100 |
|                 |                 |                  |       |                 |                  |       |                 |                  |       |                 |                  |       |
| Total (>10 y/o) | 45–54           | Total (>10 y/o)  | 45–54 |                 |                  |       |                 |                  |       |                 |                  |       |
| 1983–1987       | 31.4            | 35.1             | 111.7 | 9.0             | 63.2             | 125.0 | 21.2            | 17.3             | 120.8 | 3.6             | 21.2             | 122.9 |
| 1988–1992       | 24.6            | 27.1             | 110.7 | 6.0             | 40.9             | 119.0 | 14.2            | 12.6             | 94.5  | 2.4             | 15.4             | 105.0 |
| 1993–1997       | 24.0            | 26.0             | 104.9 | 6.2             | 39.2             | 107.1 | 12.8            | 10.8             | 98.0  | 1.6             | 11.6             | 89.6  |
| 1998–2002       | 29.4            | 33.8             | 91.8  | 6.8             | 49.7             | 88.7  | 13.4            | 11.8             | 92.3  | 2.4             | 15.3             | 101.8 |
| 2003–2007       | 31.2            | 37.2             | 99.6  | 8.8             | 70.9             | 126.8 | 13.2            | 13.0             | 98.2  | 1.8             | 14.0             | 102.5 |
| 2008–2012       | 22.4            | 32.0             | 84.7  | 4.8             | 49.6             | 102.0 | 12.4            | 13.3             | 98.6  | 1.8             | 15.9             | 106.5 |
|                 | 15–24           |                  |       | 55–64           |                  |       | 15–24           |                  |       | 55–64           |                  |       |
| 1983–1987       | 1.0             | 11.7             | 83.9  | 4.4             | 40.6             | 95.5  | 1.2             | 7.8              | 114.0 | 2.6             | 19.2             | 97.5  |
| 1988–1992       | 2.6             | 14.7             | 148.1 | 3.8             | 32.5             | 91.5  | 0.8             | 5.6              | 106.6 | 3.4             | 20.9             | 117.2 |
| 1993–1997       | 2.0             | 14.0             | 123.5 | 5.2             | 41.4             | 102.9 | 0.4             | 4.6              | 88.0  | 2.4             | 16.6             | 104.3 |
| 1998–2002       | 1.4             | 15.7             | 99.5  | 8.4             | 65.1             | 102.5 | 0.2             | 5.5              | 78.8  | 4.2             | 23.6             | 125.4 |
| 2003–2007       | 1.0             | 16.2             | 93.1  | 7.2             | 52.5             | 90.9  | 0.4             | 7.8              | 86.4  | 2.8             | 17.2             | 103.0 |
| 2008–2012       | 1.4             | 21.5             | 101.1 | 6.2             | 46.0             | 94.8  | 1.4             | 13.7             | 141.7 | 2.8             | 16.4             | 109.9 |
|                 | 25–34           |                  |       | 65–74           |                  |       | 25–34           |                  |       | 65–74           |                  |       |
| 1983–1987       | 3.2             | 26.2             | 102.6 | 3.2             | 45.4             | 103.6 | 2.4             | 14.1             | 131.3 | 3.4             | 33.1             | 105.9 |
| 1988–1992       | 3.8             | 29.3             | 153.1 | 1.8             | 27.5             | 78.2  | 1.6             | 10.7             | 122.9 | 1.8             | 19.1             | 73.3  |
| 1993–1997       | 2.2             | 21.0             | 107.6 | 2.6             | 28.9             | 90.5  | 1.4             | 9.9              | 118.5 | 2.4             | 19.0             | 97.6  |
| 1998–2002       | 4.0             | 32.2             | 119.1 | 4.2             | 42.0             | 92.4  | 0.4             | 8.6              | 74.2  | 2.2             | 18.4             | 87.5  |
| 2003–2007       | 2.8             | 29.1             | 94.0  | 4.4             | 41.7             | 97.3  | 1.8             | 14.5             | 111.3 | 2.2             | 17.7             | 94.9  |
| 2008–2012       | 2.4             | 30.9             | 94.8  | 1.6             | 25.0             | 63.4  | 0.8             | 12.8             | 89.0  | 2.0             | 16.5             | 92.8  |
|                 | 35–44           |                  |       | >74 y/o         |                  |       | 35–44           |                  |       | >74 y/o         |                  |       |
| 1983–1987       | 7.4             | 41.0             | 128.8 | 3.2             | 73.1             | 93.3  | 4.0             | 17.4             | 147.4 | 3.6             | 51.9             | 90.0  |
| 1988–1992       | 4.4             | 27.1             | 114.5 | 2.2             | 48.3             | 74.9  | 1.6             | 9.9              | 102.0 | 2.2             | 28.6             | 59.7  |
| 1993–1997       | 3.4             | 26.9             | 109.6 | 2.2             | 42.0             | 80.7  | 1.6             | 10.2             | 120.0 | 3.0             | 29.2             | 85.0  |
| 1998–2002       | 2.0             | 25.8             | 73.2  | 2.6             | 42.9             | 81.4  | 1.0             | 9.9              | 95.5  | 3.0             | 24.9             | 80.1  |
| 2003–2007       | 3.6             | 38.2             | 95.2  | 3.2             | 40.8             | 90.7  | 1.8             | 14.3             | 113.0 | 2.0             | 15.2             | 67.9  |
| 2008–2012       | 2.6             | 31.4             | 84.5  | 3.2             | 36.5             | 87.9  | 1.4             | 13.3             | 98.0  | 2.2             | 14.9             | 77.7  |

Secondary Medical Zone ID: 274

|                 | Male            |                  |       |                 |                  |       | Female          |                  |       |                 |                  |       |
|-----------------|-----------------|------------------|-------|-----------------|------------------|-------|-----------------|------------------|-------|-----------------|------------------|-------|
|                 | Suicide         |                  |       | Suicide         |                  |       | Suicide         |                  |       | Suicide         |                  |       |
|                 | Num<br>per year | Rate<br>/100,000 | × 100 | Num<br>per year | Rate<br>/100,000 | × 100 | Num<br>per year | Rate<br>/100,000 | × 100 | Num<br>per year | Rate<br>/100,000 | × 100 |
|                 |                 |                  |       |                 |                  |       |                 |                  |       |                 |                  |       |
| Total (>10 y/o) | 45–54           | Total (>10 y/o)  | 45–54 |                 |                  |       |                 |                  |       |                 |                  |       |
| 1983–1987       | 88.2            | 37.1             | 116.2 | 22.6            | 62.4             | 123.4 | 49.6            | 16.9             | 114.5 | 8.8             | 20.8             | 120.5 |
| 1988–1992       | 72.2            | 27.6             | 114.9 | 17.0            | 42.8             | 124.8 | 43.2            | 13.4             | 105.3 | 7.8             | 17.3             | 118.1 |
| 1993–1997       | 67.4            | 24.7             | 98.0  | 20.0            | 43.0             | 117.4 | 35.0            | 10.6             | 93.8  | 6.0             | 12.6             | 97.3  |
| 1998–2002       | 102.6           | 35.2             | 98.3  | 27.4            | 58.1             | 103.8 | 42.4            | 11.9             | 93.1  | 7.8             | 15.4             | 102.5 |
| 2003–2007       | 120.2           | 40.4             | 110.9 | 27.0            | 63.5             | 113.5 | 44.4            | 12.6             | 98.2  | 5.8             | 12.9             | 94.4  |
| 2008–2012       | 100.6           | 34.9             | 100.7 | 19.2            | 50.7             | 104.2 | 43.4            | 12.7             | 96.3  | 5.2             | 13.0             | 86.8  |
|                 | 15–24           |                  |       | 55–64           |                  |       | 15–24           |                  |       | 55–64           |                  |       |
| 1983–1987       | 4.8             | 12.5             | 89.9  | 10.2            | 36.6             | 86.1  | 2.8             | 6.7              | 97.4  | 10.0            | 26.5             | 134.4 |
| 1988–1992       | 5.0             | 10.9             | 109.8 | 14.0            | 40.9             | 115.2 | 3.2             | 6.3              | 119.5 | 7.2             | 18.3             | 102.3 |
| 1993–1997       | 3.0             | 7.9              | 70.2  | 13.8            | 40.0             | 99.5  | 2.4             | 5.0              | 96.7  | 5.4             | 14.0             | 88.4  |
| 1998–2002       | 7.6             | 17.4             | 110.4 | 20.2            | 55.2             | 86.9  | 2.4             | 6.0              | 85.3  | 7.4             | 17.9             | 95.0  |
| 2003–2007       | 7.4             | 19.0             | 108.8 | 28.2            | 63.7             | 110.3 | 5.0             | 11.9             | 132.0 | 8.8             | 17.9             | 106.7 |
| 2008–2012       | 9.4             | 26.5             | 125.0 | 20.8            | 46.0             | 94.7  | 2.4             | 7.9              | 81.4  | 7.4             | 14.8             | 99.2  |
|                 | 25–34           |                  |       | 65–74           |                  |       | 25–34           |                  |       | 65–74           |                  |       |
| 1983–1987       | 12.2            | 29.7             | 116.3 | 9.0             | 54.4             | 124.3 | 4.4             | 10.2             | 94.4  | 8.0             | 35.8             | 114.5 |
| 1988–1992       | 7.4             | 20.0             | 104.6 | 7.0             | 35.4             | 100.6 | 5.0             | 10.9             | 126.2 | 7.2             | 26.8             | 102.9 |
| 1993–1997       | 7.4             | 19.7             | 100.7 | 6.8             | 27.6             | 86.4  | 4.8             | 10.3             | 123.9 | 4.6             | 14.9             | 76.4  |
| 1998–2002       | 13.2            | 30.7             | 113.7 | 10.8            | 38.3             | 84.2  | 4.8             | 10.8             | 93.4  | 7.4             | 20.1             | 95.7  |
| 2003–2007       | 12.6            | 30.2             | 97.5  | 14.6            | 46.1             | 107.5 | 6.6             | 14.1             | 108.8 | 6.6             | 17.5             | 93.9  |
| 2008–2012       | 12.0            | 33.0             | 101.4 | 13.8            | 41.1             | 103.9 | 6.8             | 16.3             | 113.8 | 8.2             | 19.8             | 111.2 |
|                 | 35–44           |                  |       | >74 y/o         |                  |       | 35–44           |                  |       | >74 y/o         |                  |       |
| 1983–1987       | 21.2            | 44.1             | 138.5 | 7.8             | 78.5             | 100.3 | 8.6             | 16.0             | 135.4 | 6.8             | 46.9             | 81.4  |
| 1988–1992       | 15.8            | 32.1             | 135.3 | 5.8             | 51.0             | 79.1  | 5.6             | 10.7             | 111.2 | 7.2             | 37.0             | 77.3  |
| 1993–1997       | 10.6            | 24.8             | 101.3 | 5.8             | 43.6             | 83.7  | 5.4             | 10.9             | 128.2 | 6.2             | 26.1             | 75.8  |
| 1998–2002       | 12.4            | 32.0             | 91.0  | 10.8            | 60.9             | 115.5 | 4.2             | 9.9              | 95.8  | 8.2             | 26.8             | 86.3  |
| 2003–2007       | 21.0            | 51.8             | 129.3 | 9.2             | 41.3             | 91.6  | 3.8             | 9.9              | 78.7  | 7.8             | 20.0             | 88.9  |
| 2008–2012       | 15.0            | 35.9             | 96.5  | 10.2            | 38.0             | 91.7  | 7.0             | 14.8             | 109.2 | 6.4             | 14.2             | 73.7  |

Secondary Medical Zone ID: 275

|                 | Male            |                  |       |                 |                  |       | Female          |                  |       |                 |                  |       |
|-----------------|-----------------|------------------|-------|-----------------|------------------|-------|-----------------|------------------|-------|-----------------|------------------|-------|
|                 | Suicide         |                  |       | Suicide         |                  |       | Suicide         |                  |       | Suicide         |                  |       |
|                 | Num<br>per year | Rate<br>/100,000 | × 100 | Num<br>per year | Rate<br>/100,000 | × 100 | Num<br>per year | Rate<br>/100,000 | × 100 | Num<br>per year | Rate<br>/100,000 | × 100 |
|                 |                 |                  |       |                 |                  |       |                 |                  |       |                 |                  |       |
| Total (>10 y/o) | 45–54           | Total (>10 y/o)  | 45–54 |                 |                  |       |                 |                  |       |                 |                  |       |
| 1983–1987       | 44.2            | 42.7             | 147.4 | 10.0            | 68.0             | 134.5 | 25.0            | 18.6             | 133.1 | 3.6             | 20.5             | 119.1 |
| 1988–1992       | 29.6            | 29.1             | 128.1 | 5.6             | 42.6             | 123.9 | 16.4            | 13.1             | 102.4 | 3.0             | 17.8             | 121.6 |
| 1993–1997       | 27.8            | 28.7             | 120.6 | 4.2             | 34.5             | 94.4  | 14.0            | 11.0             | 104.1 | 1.4             | 12.0             | 92.9  |
| 1998–2002       | 37.2            | 39.5             | 116.6 | 9.2             | 65.1             | 116.3 | 19.0            | 14.2             | 121.9 | 3.2             | 18.9             | 125.6 |
| 2003–2007       | 32.8            | 38.3             | 109.1 | 7.4             | 61.6             | 110.1 | 15.0            | 13.3             | 111.2 | 2.0             | 15.2             | 111.0 |
| 2008–2012       | 26.0            | 34.1             | 100.6 | 5.4             | 52.6             | 108.3 | 9.8             | 12.2             | 89.9  | 1.0             | 13.3             | 89.2  |
|                 | 15–24           |                  |       | 55–64           |                  |       | 15–24           |                  |       | 55–64           |                  |       |
| 1983–1987       | 2.0             | 17.0             | 122.0 | 7.2             | 50.3             | 118.5 | 1.0             | 7.7              | 113.3 | 4.4             | 23.9             | 121.2 |
| 1988–1992       | 0.6             | 8.8              | 89.2  | 6.2             | 41.7             | 117.4 | 0.4             | 4.9              | 93.0  | 2.8             | 17.4             | 97.6  |
| 1993–1997       | 1.6             | 13.5             | 119.1 | 6.8             | 49.2             | 122.2 | 0.0             | 3.7              | 71.5  | 1.6             | 13.2             | 82.8  |
| 1998–2002       | 1.4             | 16.6             | 104.9 | 8.4             | 71.0             | 111.8 | 0.6             | 7.2              | 103.1 | 2.6             | 19.3             | 102.3 |
| 2003–2007       | 1.2             | 17.8             | 102.2 | 6.2             | 53.2             | 92.1  | 1.0             | 11.0             | 122.4 | 2.4             | 17.5             | 104.4 |
| 2008–2012       | 0.8             | 19.6             | 92.2  | 6.2             | 48.2             | 99.1  | 0.8             | 11.3             | 116.0 | 1.4             | 13.3             | 89.5  |
|                 | 25–34           |                  |       | 65–74           |                  |       | 25–34           |                  |       | 65–74           |                  |       |
| 1983–1987       | 5.6             | 38.0             | 148.5 | 6.0             | 63.4             | 144.7 | 2.6             | 15.6             | 144.7 | 3.4             | 30.4             | 97.4  |
| 1988–1992       | 2.8             | 24.1             | 126.3 | 5.0             | 46.4             | 131.6 | 1.6             | 11.2             | 129.1 | 2.8             | 22.8             | 87.3  |
| 1993–1997       | 2.8             | 25.7             | 131.5 | 3.4             | 30.5             | 95.5  | 1.0             | 9.2              | 110.8 | 3.2             | 20.8             | 106.8 |
| 1998–2002       | 2.4             | 28.0             | 103.8 | 5.4             | 44.9             | 98.7  | 1.2             | 12.4             | 107.0 | 3.2             | 21.0             | 99.9  |
| 2003–2007       | 3.4             | 36.8             | 118.5 | 5.2             | 45.5             | 106.0 | 0.8             | 12.2             | 93.9  | 2.8             | 19.5             | 104.6 |
| 2008–2012       | 1.8             | 30.8             | 94.6  | 3.0             | 34.4             | 87.2  | 0.2             | 11.4             | 79.5  | 2.6             | 19.3             | 108.6 |
|                 | 35–44           |                  |       | >74 y/o         |                  |       | 35–44           |                  |       | >74 y/o         |                  |       |
| 1983–1987       | 6.0             | 40.3             | 126.7 | 7.2             | 123.3            | 157.5 | 2.6             | 14.9             | 126.3 | 7.4             | 86.5             | 149.9 |
| 1988–1992       | 4.6             | 29.9             | 126.3 | 4.8             | 75.6             | 117.2 | 1.4             | 10.0             | 103.3 | 4.4             | 43.9             | 91.8  |
| 1993–1997       | 4.8             | 34.4             | 140.5 | 4.2             | 59.6             | 114.5 | 2.0             | 12.0             | 140.9 | 4.6             | 37.6             | 109.4 |
| 1998–2002       | 4.6             | 41.7             | 118.5 | 5.4             | 62.8             | 119.2 | 1.8             | 13.2             | 128.0 | 6.4             | 41.9             | 135.0 |
| 2003–2007       | 3.6             | 41.2             | 102.8 | 5.8             | 54.6             | 121.1 | 1.0             | 12.2             | 96.8  | 4.8             | 26.5             | 118.0 |
| 2008–2012       | 2.4             | 34.4             | 92.4  | 6.4             | 52.3             | 126.0 | 0.6             | 11.8             | 86.7  | 3.2             | 17.2             | 89.6  |

Secondary Medical Zone ID: 276

|                 | Male            |                  |       |                 |                  |       | Female          |                  |       |                 |                  |       |
|-----------------|-----------------|------------------|-------|-----------------|------------------|-------|-----------------|------------------|-------|-----------------|------------------|-------|
|                 | Suicide         |                  |       | Suicide         |                  |       | Suicide         |                  |       | Suicide         |                  |       |
|                 | Num<br>per year | Rate<br>/100,000 | × 100 | Num<br>per year | Rate<br>/100,000 | × 100 | Num<br>per year | Rate<br>/100,000 | × 100 | Num<br>per year | Rate<br>/100,000 | × 100 |
|                 |                 |                  |       |                 |                  |       |                 |                  |       |                 |                  |       |
| Total (>10 y/o) | 45–54           | Total (>10 y/o)  | 45–54 |                 |                  |       |                 |                  |       |                 |                  |       |
| 1983–1987       | 30.2            | 39.0             | 129.9 | 7.6             | 65.9             | 130.3 | 16.4            | 16.5             | 113.7 | 2.8             | 20.1             | 116.4 |
| 1988–1992       | 20.8            | 27.4             | 116.8 | 4.8             | 43.7             | 127.3 | 12.2            | 12.8             | 98.5  | 2.0             | 16.0             | 109.4 |
| 1993–1997       | 20.4            | 27.1             | 113.0 | 6.2             | 47.5             | 129.8 | 10.8            | 11.0             | 102.3 | 1.4             | 12.7             | 98.2  |
| 1998–2002       | 31.2            | 41.1             | 121.9 | 9.6             | 74.5             | 133.0 | 9.8             | 12.1             | 89.2  | 1.6             | 14.7             | 97.4  |
| 2003–2007       | 29.2            | 41.6             | 121.3 | 7.8             | 75.3             | 134.6 | 9.4             | 12.5             | 94.7  | 1.4             | 13.9             | 101.7 |
| 2008–2012       | 22.6            | 35.1             | 108.4 | 2.2             | 39.0             | 80.3  | 8.6             | 12.5             | 95.0  | 0.8             | 13.3             | 89.4  |
|                 | 15–24           |                  |       | 55–64           |                  |       | 15–24           |                  |       | 55–64           |                  |       |
| 1983–1987       | 1.8             | 18.0             | 129.0 | 5.2             | 48.6             | 114.4 | 0.8             | 7.7              | 112.9 | 3.8             | 25.5             | 129.3 |
| 1988–1992       | 1.4             | 12.3             | 124.2 | 3.0             | 31.2             | 87.8  | 0.2             | 4.6              | 86.7  | 1.8             | 16.2             | 90.8  |
| 1993–1997       | 0.6             | 10.5             | 92.9  | 6.2             | 53.9             | 133.9 | 0.0             | 3.9              | 74.9  | 1.8             | 15.7             | 99.0  |
| 1998–2002       | 0.6             | 14.0             | 88.6  | 9.2             | 87.8             | 138.2 | 0.0             | 5.5              | 77.8  | 2.8             | 21.8             | 115.7 |
| 2003–2007       | 0.6             | 16.2             | 93.0  | 9.6             | 81.3             | 140.9 | 0.4             | 8.8              | 98.0  | 1.2             | 14.6             | 87.3  |
| 2008–2012       | 0.4             | 18.8             | 88.6  | 6.4             | 53.8             | 110.6 | 0.2             | 8.6              | 89.1  | 1.8             | 15.2             | 102.0 |
|                 | 25–34           |                  |       | 65–74           |                  |       | 25–34           |                  |       | 65–74           |                  |       |
| 1983–1987       | 5.8             | 43.0             | 168.4 | 3.4             | 51.8             | 118.2 | 1.2             | 11.0             | 102.6 | 2.8             | 31.7             | 101.5 |
| 1988–1992       | 1.0             | 15.9             | 83.1  | 2.4             | 34.7             | 98.6  | 1.0             | 9.6              | 110.7 | 2.6             | 26.0             | 99.8  |
| 1993–1997       | 1.2             | 18.6             | 95.3  | 1.6             | 24.0             | 75.1  | 0.2             | 6.8              | 81.5  | 2.4             | 20.6             | 105.5 |
| 1998–2002       | 2.4             | 30.1             | 111.4 | 2.6             | 35.8             | 78.8  | 0.4             | 10.1             | 86.8  | 1.6             | 17.0             | 80.9  |
| 2003–2007       | 2.0             | 31.3             | 101.0 | 3.4             | 41.4             | 96.5  | 1.4             | 15.5             | 119.5 | 2.2             | 19.4             | 104.4 |
| 2008–2012       | 1.8             | 33.3             | 102.2 | 3.6             | 42.9             | 108.6 | 0.2             | 12.1             | 84.3  | 1.8             | 18.0             | 101.2 |
|                 | 35–44           |                  |       | >74 y/o         |                  |       | 35–44           |                  |       | >74 y/o         |                  |       |
| 1983–1987       | 4.4             | 35.5             | 111.6 | 2.0             | 61.1             | 78.0  | 1.8             | 13.1             | 110.9 | 3.2             | 53.2             | 92.1  |
| 1988–1992       | 4.8             | 33.4             | 141.0 | 3.4             | 74.0             | 114.7 | 1.8             | 11.6             | 119.8 | 2.8             | 38.7             | 80.9  |
| 1993–1997       | 2.8             | 26.7             | 109.0 | 1.6             | 40.0             | 76.9  | 2.0             | 12.6             | 148.3 | 3.0             | 33.7             | 97.8  |
| 1998–2002       | 3.8             | 42.1             | 119.4 | 3.0             | 52.9             | 100.4 | 1.4             | 12.4             | 120.4 | 2.0             | 21.2             | 68.4  |
| 2003–2007       | 3.6             | 47.7             | 119.1 | 2.2             | 36.1             | 80.2  | 0.6             | 11.4             | 90.5  | 2.2             | 18.2             | 81.2  |
| 2008–2012       | 3.8             | 44.7             | 120.1 | 4.4             | 49.0             | 118.2 | 1.4             | 15.3             | 113.2 | 2.4             | 17.2             | 89.7  |

Secondary Medical Zone ID: 277

|           | Male            |                  |       |                 |                  |       | Female          |                  |       |                 |                  |       |
|-----------|-----------------|------------------|-------|-----------------|------------------|-------|-----------------|------------------|-------|-----------------|------------------|-------|
|           | Suicide         |                  |       | Suicide         |                  |       | Suicide         |                  |       | Suicide         |                  |       |
|           | Num<br>per year | Rate<br>/100,000 | × 100 | Num<br>per year | Rate<br>/100,000 | × 100 | Num<br>per year | Rate<br>/100,000 | × 100 | Num<br>per year | Rate<br>/100,000 | × 100 |
|           |                 |                  |       |                 |                  |       |                 |                  |       |                 |                  |       |
|           | Total (>10 y/o) |                  |       | 45–54           |                  |       | Total (>10 y/o) |                  |       | 45–54           |                  |       |
| 1983–1987 | 14.8            | 36.7             | 127.9 | 3.4             | 57.4             | 113.4 | 5.6             | 14.4             | 91.5  | 1.0             | 17.4             | 101.0 |
| 1988–1992 | 10.6            | 26.8             | 119.8 | 2.4             | 40.4             | 117.5 | 4.0             | 11.7             | 80.6  | 0.6             | 14.0             | 95.7  |
| 1993–1997 | 12.6            | 29.5             | 134.8 | 3.0             | 44.4             | 121.3 | 4.6             | 10.6             | 96.7  | 1.0             | 14.3             | 110.4 |
| 1998–2002 | 12.8            | 37.6             | 108.5 | 2.2             | 51.2             | 91.4  | 3.8             | 11.7             | 85.7  | 1.0             | 16.1             | 106.9 |
| 2003–2007 | 15.6            | 41.9             | 133.6 | 3.8             | 75.3             | 134.6 | 4.0             | 12.4             | 94.6  | 1.0             | 15.8             | 115.0 |
| 2008–2012 | 13.2            | 37.2             | 125.2 | 2.6             | 58.4             | 120.1 | 4.2             | 13.2             | 100.6 | 0.8             | 16.6             | 111.5 |
|           | 15–24           |                  |       | 55–64           |                  |       | 15–24           |                  |       | 55–64           |                  |       |
| 1983–1987 | 0.4             | 13.3             | 95.2  | 3.6             | 57.1             | 134.3 | 0.2             | 6.6              | 97.1  | 1.4             | 21.1             | 107.2 |
| 1988–1992 | 0.8             | 11.9             | 120.4 | 2.0             | 37.1             | 104.3 | 0.2             | 5.4              | 102.3 | 0.4             | 14.6             | 81.7  |
| 1993–1997 | 0.0             | 9.9              | 87.1  | 4.0             | 56.8             | 141.1 | 0.0             | 4.6              | 88.5  | 0.8             | 15.6             | 98.0  |
| 1998–2002 | 0.0             | 13.5             | 85.7  | 4.2             | 76.0             | 119.6 | 0.0             | 6.3              | 90.2  | 0.8             | 18.2             | 96.5  |
| 2003–2007 | 0.6             | 18.8             | 107.7 | 4.6             | 75.0             | 129.9 | 0.2             | 9.1              | 101.4 | 0.4             | 14.9             | 88.8  |
| 2008–2012 | 0.4             | 21.5             | 101.6 | 3.6             | 57.7             | 118.7 | 0.2             | 10.0             | 102.6 | 0.2             | 12.9             | 86.2  |
|           | 25–34           |                  |       | 65–74           |                  |       | 25–34           |                  |       | 65–74           |                  |       |
| 1983–1987 | 2.0             | 32.6             | 127.4 | 0.8             | 37.3             | 85.2  | 0.0             | 8.3              | 77.4  | 1.8             | 35.5             | 113.7 |
| 1988–1992 | 0.4             | 16.7             | 87.4  | 1.6             | 40.2             | 114.0 | 0.8             | 10.9             | 125.5 | 1.2             | 25.3             | 97.1  |
| 1993–1997 | 0.8             | 21.1             | 108.1 | 0.8             | 26.8             | 83.9  | 0.0             | 7.2              | 86.5  | 1.2             | 20.8             | 106.6 |
| 1998–2002 | 1.0             | 28.7             | 106.3 | 1.6             | 42.0             | 92.4  | 0.0             | 10.2             | 87.6  | 1.0             | 20.1             | 95.9  |
| 2003–2007 | 1.4             | 36.0             | 115.9 | 2.2             | 46.6             | 108.7 | 0.4             | 13.4             | 103.0 | 0.4             | 15.4             | 82.8  |
| 2008–2012 | 1.0             | 34.5             | 106.0 | 2.6             | 48.1             | 121.6 | 0.6             | 16.0             | 111.5 | 0.8             | 17.7             | 99.3  |
|           | 35–44           |                  |       | >74 y/o         |                  |       | 35–44           |                  |       | >74 y/o         |                  |       |
| 1983–1987 | 3.0             | 41.3             | 129.9 | 1.4             | 80.5             | 102.7 | 0.6             | 11.6             | 98.2  | 0.6             | 34.4             | 59.6  |
| 1988–1992 | 2.4             | 32.2             | 135.9 | 1.0             | 57.6             | 89.3  | 0.4             | 9.3              | 96.2  | 0.4             | 23.3             | 48.6  |
| 1993–1997 | 3.0             | 41.7             | 170.1 | 1.0             | 48.6             | 93.3  | 0.4             | 8.7              | 102.6 | 1.2             | 29.4             | 85.3  |
| 1998–2002 | 2.6             | 49.3             | 139.9 | 0.8             | 42.5             | 80.7  | 0.0             | 8.6              | 83.4  | 1.0             | 23.4             | 75.4  |
| 2003–2007 | 1.6             | 45.6             | 113.8 | 1.4             | 43.9             | 97.5  | 0.2             | 11.8             | 93.7  | 1.4             | 22.8             | 101.8 |
| 2008–2012 | 1.0             | 37.4             | 100.4 | 2.0             | 46.2             | 111.4 | 0.4             | 13.7             | 101.3 | 1.2             | 18.6             | 96.7  |

Secondary Medical Zone ID: 278

|                 | Male            |                  |       |                 |                  |       | Female          |                  |       |                 |                  |       |
|-----------------|-----------------|------------------|-------|-----------------|------------------|-------|-----------------|------------------|-------|-----------------|------------------|-------|
|                 | Suicide         |                  |       | Suicide         |                  |       | Suicide         |                  |       | Suicide         |                  |       |
|                 | Num<br>per year | Rate<br>/100,000 | × 100 | Num<br>per year | Rate<br>/100,000 | × 100 | Num<br>per year | Rate<br>/100,000 | × 100 | Num<br>per year | Rate<br>/100,000 | × 100 |
|                 |                 |                  |       |                 |                  |       |                 |                  |       |                 |                  |       |
| Total (>10 y/o) | 45–54           | Total (>10 y/o)  | 45–54 |                 |                  |       |                 |                  |       |                 |                  |       |
| 1983–1987       | 102.2           | 42.0             | 136.2 | 24.6            | 68.8             | 136.1 | 46.4            | 16.1             | 105.7 | 8.2             | 20.1             | 116.5 |
| 1988–1992       | 81.6            | 31.5             | 133.6 | 16.6            | 44.5             | 129.6 | 42.6            | 13.2             | 101.9 | 5.6             | 14.4             | 98.3  |
| 1993–1997       | 70.4            | 26.8             | 108.7 | 18.2            | 42.4             | 115.8 | 38.6            | 11.7             | 103.5 | 6.6             | 14.4             | 111.5 |
| 1998–2002       | 103.2           | 37.4             | 107.1 | 29.2            | 67.2             | 120.1 | 40.8            | 12.1             | 94.0  | 8.2             | 17.6             | 116.9 |
| 2003–2007       | 110.8           | 40.4             | 114.4 | 26.0            | 70.2             | 125.4 | 44.6            | 13.4             | 106.9 | 7.4             | 17.6             | 128.3 |
| 2008–2012       | 100.8           | 38.0             | 115.1 | 20.2            | 60.6             | 124.7 | 37.8            | 12.6             | 96.0  | 5.4             | 15.6             | 104.2 |
|                 | 15–24           |                  |       | 55–64           |                  |       | 15–24           |                  |       | 55–64           |                  |       |
| 1983–1987       | 4.0             | 13.1             | 93.7  | 17.2            | 53.4             | 125.7 | 3.0             | 8.1              | 118.5 | 9.4             | 23.6             | 119.8 |
| 1988–1992       | 3.8             | 10.6             | 107.1 | 15.0            | 42.8             | 120.4 | 1.6             | 4.7              | 89.2  | 9.4             | 22.1             | 123.8 |
| 1993–1997       | 3.8             | 10.8             | 95.1  | 13.0            | 39.4             | 97.9  | 1.6             | 4.6              | 89.0  | 7.0             | 17.6             | 110.6 |
| 1998–2002       | 3.8             | 12.6             | 79.6  | 22.2            | 63.9             | 100.5 | 1.4             | 5.3              | 74.9  | 9.0             | 21.6             | 115.0 |
| 2003–2007       | 4.2             | 15.2             | 87.0  | 31.6            | 75.8             | 131.3 | 3.6             | 11.1             | 123.8 | 6.4             | 15.3             | 91.2  |
| 2008–2012       | 3.4             | 16.0             | 75.6  | 27.6            | 63.7             | 131.2 | 2.2             | 9.2              | 94.6  | 7.0             | 15.7             | 105.0 |
|                 | 25–34           |                  |       | 65–74           |                  |       | 25–34           |                  |       | 65–74           |                  |       |
| 1983–1987       | 11.4            | 31.0             | 121.4 | 10.6            | 56.8             | 129.8 | 4.8             | 12.2             | 113.7 | 7.6             | 30.3             | 96.8  |
| 1988–1992       | 8.6             | 25.7             | 134.5 | 11.4            | 49.2             | 139.7 | 2.8             | 8.4              | 96.8  | 10.8            | 33.8             | 129.5 |
| 1993–1997       | 7.2             | 22.3             | 114.4 | 10.8            | 38.6             | 121.1 | 3.4             | 9.4              | 113.3 | 7.4             | 20.4             | 104.7 |
| 1998–2002       | 7.6             | 23.4             | 86.6  | 15.6            | 50.6             | 111.3 | 4.0             | 11.3             | 97.1  | 6.2             | 17.1             | 81.4  |
| 2003–2007       | 11.0            | 31.4             | 101.2 | 14.8            | 48.7             | 113.4 | 4.8             | 13.2             | 101.8 | 8.2             | 21.2             | 113.9 |
| 2008–2012       | 10.4            | 34.8             | 106.7 | 14.4            | 45.9             | 116.3 | 3.6             | 12.8             | 89.1  | 6.8             | 18.3             | 102.8 |
|                 | 35–44           |                  |       | >74 y/o         |                  |       | 35–44           |                  |       | >74 y/o         |                  |       |
| 1983–1987       | 24.6            | 53.2             | 167.3 | 9.8             | 89.9             | 114.7 | 5.6             | 12.2             | 103.6 | 7.6             | 46.4             | 80.5  |
| 1988–1992       | 16.4            | 36.2             | 152.9 | 9.8             | 72.0             | 111.7 | 4.8             | 10.5             | 109.0 | 7.6             | 32.8             | 68.6  |
| 1993–1997       | 9.0             | 24.7             | 100.7 | 8.4             | 54.0             | 103.7 | 5.6             | 12.8             | 150.0 | 7.0             | 24.5             | 71.2  |
| 1998–2002       | 12.8            | 38.1             | 108.1 | 11.6            | 59.5             | 112.8 | 2.6             | 8.4              | 81.1  | 9.4             | 26.2             | 84.3  |
| 2003–2007       | 12.8            | 39.8             | 99.3  | 10.4            | 43.3             | 96.2  | 4.0             | 12.0             | 94.6  | 10.2            | 22.8             | 101.4 |
| 2008–2012       | 13.0            | 37.7             | 101.5 | 11.4            | 41.1             | 99.1  | 4.8             | 13.4             | 98.6  | 7.8             | 15.7             | 81.8  |

Secondary Medical Zone ID: 279

|           | Male            |          |       |          |          |       | Female          |          |       |          |          |       |
|-----------|-----------------|----------|-------|----------|----------|-------|-----------------|----------|-------|----------|----------|-------|
|           | Suicide         |          |       | Suicide  |          |       | Suicide         |          |       | Suicide  |          |       |
|           | Num             | Rate     | × 100 | Num      | Rate     | × 100 | Num             | Rate     | × 100 | Num      | Rate     | × 100 |
|           | per year        | /100,000 |       | per year | /100,000 |       | per year        | /100,000 |       | per year | /100,000 |       |
|           | Total (>10 y/o) |          |       | 45–54    |          |       | Total (>10 y/o) |          |       | 45–54    |          |       |
| 1983–1987 | 16.4            | 37.1     | 129.6 | 3.8      | 60.9     | 120.4 | 8.2             | 16.1     | 111.0 | 1.2      | 18.2     | 105.9 |
| 1988–1992 | 14.6            | 29.6     | 142.4 | 2.8      | 44.1     | 128.4 | 5.4             | 12.2     | 90.9  | 1.0      | 15.6     | 106.8 |
| 1993–1997 | 14.0            | 29.2     | 136.1 | 3.4      | 46.8     | 127.9 | 5.0             | 10.7     | 96.7  | 1.0      | 14.3     | 110.7 |
| 1998–2002 | 15.4            | 38.4     | 115.3 | 3.2      | 57.6     | 102.9 | 5.4             | 12.4     | 96.1  | 1.4      | 17.7     | 117.6 |
| 2003–2007 | 20.2            | 46.1     | 150.8 | 4.6      | 78.8     | 140.8 | 6.2             | 13.3     | 110.2 | 1.0      | 15.5     | 113.1 |
| 2008–2012 | 11.2            | 34.6     | 104.5 | 2.2      | 52.8     | 108.7 | 3.0             | 12.1     | 87.0  | 0.2      | 13.3     | 89.1  |
|           | 15–24           |          |       | 55–64    |          |       | 15–24           |          |       | 55–64    |          |       |
| 1983–1987 | 0.8             | 16.2     | 116.4 | 3.6      | 54.0     | 127.0 | 0.0             | 5.9      | 85.7  | 1.0      | 18.3     | 92.8  |
| 1988–1992 | 0.4             | 10.0     | 101.2 | 2.6      | 40.4     | 113.9 | 0.0             | 4.5      | 86.0  | 0.0      | 12.2     | 68.1  |
| 1993–1997 | 0.0             | 9.5      | 84.1  | 3.6      | 52.8     | 131.1 | 0.2             | 5.3      | 101.7 | 0.6      | 14.2     | 89.3  |
| 1998–2002 | 0.8             | 17.3     | 109.2 | 3.6      | 70.3     | 110.6 | 0.2             | 7.0      | 99.7  | 0.4      | 16.3     | 86.5  |
| 2003–2007 | 0.4             | 17.0     | 97.2  | 6.2      | 89.0     | 154.3 | 0.2             | 8.9      | 98.8  | 1.6      | 19.7     | 117.9 |
| 2008–2012 | 0.6             | 22.1     | 104.1 | 2.8      | 50.1     | 103.1 | 0.0             | 8.5      | 88.0  | 0.0      | 12.1     | 80.9  |
|           | 25–34           |          |       | 65–74    |          |       | 25–34           |          |       | 65–74    |          |       |
| 1983–1987 | 1.8             | 29.8     | 116.5 | 0.8      | 36.0     | 82.2  | 0.4             | 10.2     | 94.9  | 2.2      | 39.3     | 125.8 |
| 1988–1992 | 1.4             | 24.6     | 128.9 | 2.2      | 44.7     | 126.8 | 0.6             | 9.9      | 113.8 | 1.0      | 22.7     | 87.1  |
| 1993–1997 | 1.6             | 26.7     | 136.9 | 1.6      | 33.0     | 103.4 | 0.4             | 8.9      | 106.9 | 0.6      | 15.3     | 78.3  |
| 1998–2002 | 1.2             | 29.3     | 108.7 | 2.2      | 44.9     | 98.8  | 0.2             | 10.9     | 94.2  | 0.8      | 18.0     | 85.5  |
| 2003–2007 | 1.2             | 33.0     | 106.6 | 1.4      | 37.7     | 88.0  | 0.4             | 13.2     | 101.3 | 1.0      | 18.6     | 99.7  |
| 2008–2012 | 0.2             | 28.2     | 86.5  | 1.8      | 41.0     | 103.8 | 0.0             | 12.7     | 88.9  | 1.0      | 18.5     | 103.9 |
|           | 35–44           |          |       | >74 y/o  |          |       | 35–44           |          |       | >74 y/o  |          |       |
| 1983–1987 | 2.4             | 37.0     | 116.1 | 3.0      | 106.4    | 135.8 | 1.4             | 15.0     | 126.9 | 2.0      | 60.2     | 104.4 |
| 1988–1992 | 2.8             | 34.3     | 144.6 | 2.4      | 79.3     | 122.9 | 0.6             | 10.0     | 103.9 | 2.2      | 50.6     | 105.8 |
| 1993–1997 | 1.6             | 28.1     | 114.5 | 2.2      | 66.1     | 126.9 | 0.6             | 9.5      | 112.0 | 1.6      | 32.5     | 94.4  |
| 1998–2002 | 2.2             | 43.5     | 123.4 | 2.2      | 59.2     | 112.3 | 0.4             | 10.4     | 100.8 | 2.0      | 32.2     | 103.7 |
| 2003–2007 | 3.6             | 68.0     | 169.6 | 2.6      | 53.9     | 119.6 | 0.6             | 13.6     | 107.7 | 1.4      | 20.4     | 90.9  |
| 2008–2012 | 1.0             | 36.4     | 97.8  | 2.6      | 47.6     | 114.7 | 0.4             | 13.6     | 100.1 | 1.4      | 18.0     | 93.7  |



Secondary Medical Zone ID: 280

|           | Male            |          |       |          |          |       | Female          |          |       |          |          |       |
|-----------|-----------------|----------|-------|----------|----------|-------|-----------------|----------|-------|----------|----------|-------|
|           | Suicide         |          |       | Suicide  |          |       | Suicide         |          |       | Suicide  |          |       |
|           | Num             | Rate     | × 100 | Num      | Rate     | × 100 | Num             | Rate     | × 100 | Num      | Rate     | × 100 |
|           | per year        | /100,000 |       | per year | /100,000 |       | per year        | /100,000 |       | per year | /100,000 |       |
|           | Total (>10 y/o) |          |       | 45–54    |          |       | Total (>10 y/o) |          |       | 45–54    |          |       |
| 1983–1987 | 23.4            | 39.0     | 137.6 | 4.4      | 56.0     | 110.8 | 8.6             | 14.4     | 91.5  | 1.0      | 15.4     | 89.6  |
| 1988–1992 | 17.4            | 28.4     | 129.5 | 3.6      | 43.0     | 125.1 | 8.0             | 12.2     | 92.2  | 1.0      | 14.2     | 97.4  |
| 1993–1997 | 14.4            | 26.3     | 108.4 | 2.2      | 32.4     | 88.4  | 8.2             | 10.9     | 104.5 | 0.6      | 11.3     | 87.2  |
| 1998–2002 | 26.0            | 41.5     | 131.0 | 6.6      | 69.0     | 123.3 | 7.2             | 12.0     | 89.4  | 0.6      | 12.7     | 84.5  |
| 2003–2007 | 28.6            | 45.2     | 148.3 | 7.0      | 83.2     | 148.8 | 8.0             | 12.5     | 101.9 | 0.6      | 12.3     | 89.5  |
| 2008–2012 | 26.0            | 41.0     | 145.8 | 5.8      | 72.5     | 149.2 | 8.2             | 13.1     | 107.2 | 1.4      | 17.4     | 116.3 |
| -----     |                 |          |       |          |          |       |                 |          |       |          |          |       |
|           | 15–24           |          |       | 55–64    |          |       | 15–24           |          |       | 55–64    |          |       |
| 1983–1987 | 1.0             | 15.9     | 114.0 | 4.0      | 50.4     | 118.5 | 1.0             | 9.3      | 135.7 | 2.2      | 22.0     | 111.7 |
| 1988–1992 | 1.2             | 12.6     | 127.6 | 2.6      | 34.7     | 97.6  | 0.2             | 5.0      | 95.0  | 1.0      | 15.3     | 85.6  |
| 1993–1997 | 0.6             | 11.4     | 100.5 | 3.2      | 42.7     | 106.1 | 0.2             | 5.0      | 95.8  | 1.6      | 17.4     | 109.7 |
| 1998–2002 | 0.8             | 16.2     | 102.3 | 3.8      | 59.5     | 93.7  | 0.2             | 6.6      | 94.1  | 1.2      | 17.9     | 95.0  |
| 2003–2007 | 1.0             | 19.3     | 110.9 | 7.8      | 82.6     | 143.2 | 0.2             | 8.3      | 92.7  | 2.2      | 19.7     | 117.8 |
| 2008–2012 | 0.6             | 21.2     | 99.8  | 7.4      | 68.0     | 139.9 | 0.2             | 9.3      | 96.0  | 1.6      | 16.1     | 107.7 |
| -----     |                 |          |       |          |          |       |                 |          |       |          |          |       |
|           | 25–34           |          |       | 65–74    |          |       | 25–34           |          |       | 65–74    |          |       |
| 1983–1987 | 3.2             | 34.6     | 135.3 | 2.4      | 50.6     | 115.5 | 0.6             | 9.9      | 91.9  | 1.4      | 26.9     | 86.0  |
| 1988–1992 | 2.2             | 27.2     | 142.2 | 3.0      | 47.3     | 134.4 | 0.2             | 7.3      | 84.6  | 1.4      | 22.1     | 84.8  |
| 1993–1997 | 1.4             | 22.3     | 114.3 | 1.4      | 26.8     | 84.1  | 0.6             | 9.0      | 107.6 | 1.0      | 15.5     | 79.3  |
| 1998–2002 | 3.4             | 38.9     | 144.0 | 4.8      | 58.0     | 127.6 | 0.8             | 12.4     | 106.6 | 1.6      | 20.0     | 95.0  |
| 2003–2007 | 2.6             | 37.8     | 121.9 | 5.2      | 62.6     | 145.9 | 0.8             | 13.7     | 105.2 | 2.2      | 22.4     | 120.3 |
| 2008–2012 | 2.4             | 38.7     | 118.9 | 2.8      | 42.6     | 107.8 | 0.2             | 12.6     | 88.1  | 1.4      | 18.3     | 103.1 |
| -----     |                 |          |       |          |          |       |                 |          |       |          |          |       |
|           | 35–44           |          |       | >74 y/o  |          |       | 35–44           |          |       | >74 y/o  |          |       |
| 1983–1987 | 5.2             | 47.8     | 150.1 | 3.0      | 95.0     | 121.2 | 1.0             | 11.8     | 100.2 | 1.4      | 38.5     | 66.8  |
| 1988–1992 | 2.0             | 23.6     | 99.7  | 2.6      | 73.9     | 114.6 | 1.2             | 10.9     | 113.0 | 3.0      | 50.9     | 106.4 |
| 1993–1997 | 2.6             | 30.2     | 123.2 | 3.0      | 70.9     | 136.2 | 0.8             | 9.3      | 108.9 | 3.4      | 45.3     | 131.5 |
| 1998–2002 | 3.2             | 44.1     | 125.2 | 3.4      | 67.1     | 127.2 | 0.6             | 10.2     | 98.9  | 2.2      | 27.1     | 87.4  |
| 2003–2007 | 2.2             | 41.6     | 103.9 | 2.8      | 48.5     | 107.8 | 0.4             | 11.5     | 91.2  | 1.6      | 17.6     | 78.4  |
| 2008–2012 | 2.4             | 40.3     | 108.4 | 4.6      | 58.9     | 142.0 | 0.8             | 14.0     | 103.2 | 2.6      | 21.4     | 111.4 |

Secondary Medical Zone ID: 281

|           | Male            |          |       |          |          |       | Female          |          |       |          |          |       |
|-----------|-----------------|----------|-------|----------|----------|-------|-----------------|----------|-------|----------|----------|-------|
|           | Suicide         |          |       | Suicide  |          |       | Suicide         |          |       | Suicide  |          |       |
|           | Num             | Rate     | × 100 | Num      | Rate     | × 100 | Num             | Rate     | × 100 | Num      | Rate     | × 100 |
|           | per year        | /100,000 |       | per year | /100,000 |       | per year        | /100,000 |       | per year | /100,000 |       |
|           | Total (>10 y/o) |          |       | 45–54    |          |       | Total (>10 y/o) |          |       | 45–54    |          |       |
| 1983–1987 | 169.8           | 36.9     | 114.8 | 47.8     | 67.5     | 133.5 | 73.2            | 14.5     | 95.0  | 13.8     | 17.8     | 103.2 |
| 1988–1992 | 136.4           | 26.6     | 109.0 | 32.8     | 41.4     | 120.5 | 68.0            | 11.6     | 89.8  | 12.4     | 14.4     | 98.7  |
| 1993–1997 | 159.2           | 27.6     | 111.0 | 42.0     | 43.5     | 118.9 | 69.8            | 10.5     | 95.9  | 14.6     | 14.2     | 110.0 |
| 1998–2002 | 256.4           | 40.4     | 114.3 | 68.6     | 66.9     | 119.6 | 92.8            | 12.8     | 99.5  | 18.2     | 16.8     | 111.7 |
| 2003–2007 | 270.0           | 40.8     | 112.4 | 68.0     | 71.9     | 128.5 | 92.8            | 12.3     | 95.5  | 14.2     | 14.2     | 103.9 |
| 2008–2012 | 245.2           | 35.7     | 105.3 | 40.0     | 44.6     | 91.7  | 107.2           | 13.5     | 103.6 | 17.8     | 17.9     | 119.8 |
|           | 15–24           |          |       | 55–64    |          |       | 15–24           |          |       | 55–64    |          |       |
| 1983–1987 | 12.8            | 12.3     | 88.1  | 23.4     | 49.2     | 115.8 | 5.6             | 6.2      | 90.6  | 10.8     | 19.0     | 96.2  |
| 1988–1992 | 9.8             | 8.2      | 82.8  | 28.4     | 47.3     | 133.3 | 6.2             | 5.6      | 105.7 | 12.0     | 17.8     | 99.8  |
| 1993–1997 | 12.0            | 9.6      | 84.8  | 32.0     | 47.7     | 118.4 | 5.8             | 5.0      | 96.3  | 10.4     | 14.1     | 88.8  |
| 1998–2002 | 16.8            | 14.2     | 89.8  | 64.2     | 85.2     | 134.1 | 7.6             | 6.8      | 97.0  | 19.8     | 22.8     | 121.3 |
| 2003–2007 | 14.6            | 14.2     | 81.4  | 63.8     | 70.4     | 122.0 | 8.8             | 8.7      | 96.7  | 17.4     | 17.5     | 104.4 |
| 2008–2012 | 16.4            | 18.8     | 88.7  | 58.2     | 57.5     | 118.3 | 9.2             | 10.2     | 105.4 | 18.0     | 16.3     | 109.5 |
|           | 25–34           |          |       | 65–74    |          |       | 25–34           |          |       | 65–74    |          |       |
| 1983–1987 | 27.0            | 27.5     | 107.4 | 11.6     | 47.0     | 107.4 | 11.8            | 11.6     | 108.0 | 9.6      | 27.8     | 88.9  |
| 1988–1992 | 17.8            | 19.0     | 99.3  | 9.8      | 32.5     | 92.3  | 7.8             | 8.0      | 92.5  | 8.8      | 20.7     | 79.2  |
| 1993–1997 | 20.0            | 20.0     | 102.6 | 14.2     | 34.7     | 108.8 | 10.4            | 9.6      | 115.1 | 8.6      | 16.3     | 83.5  |
| 1998–2002 | 30.0            | 26.6     | 98.6  | 29.2     | 56.3     | 123.7 | 12.4            | 10.5     | 90.6  | 14.4     | 22.4     | 106.8 |
| 2003–2007 | 34.8            | 30.4     | 97.9  | 27.4     | 47.2     | 109.9 | 16.6            | 13.3     | 102.5 | 10.6     | 15.3     | 82.4  |
| 2008–2012 | 38.2            | 36.6     | 112.4 | 32.4     | 49.1     | 124.3 | 16.2            | 13.9     | 96.7  | 13.8     | 17.3     | 97.2  |
|           | 35–44           |          |       | >74 y/o  |          |       | 35–44           |          |       | >74 y/o  |          |       |
| 1983–1987 | 37.6            | 38.3     | 120.5 | 8.8      | 70.8     | 90.4  | 11.2            | 10.9     | 92.6  | 10.2     | 50.3     | 87.2  |
| 1988–1992 | 26.6            | 25.7     | 108.3 | 10.8     | 63.9     | 99.0  | 10.8            | 10.0     | 103.1 | 9.6      | 31.9     | 66.6  |
| 1993–1997 | 28.4            | 29.5     | 120.3 | 10.6     | 52.1     | 100.0 | 10.2            | 10.0     | 118.2 | 9.0      | 23.3     | 67.6  |
| 1998–2002 | 35.6            | 38.8     | 110.1 | 11.8     | 44.9     | 85.2  | 11.0            | 11.3     | 109.0 | 9.4      | 19.0     | 61.0  |
| 2003–2007 | 45.4            | 45.9     | 114.6 | 15.4     | 43.2     | 95.9  | 13.2            | 12.6     | 99.4  | 12.0     | 18.4     | 82.0  |
| 2008–2012 | 43.2            | 38.4     | 103.3 | 16.2     | 36.2     | 87.4  | 18.0            | 14.6     | 108.0 | 14.2     | 17.5     | 90.9  |

Secondary Medical Zone ID: 282

|           | Male            |          |       |          |          |       | Female          |          |       |          |          |       |
|-----------|-----------------|----------|-------|----------|----------|-------|-----------------|----------|-------|----------|----------|-------|
|           | Suicide         |          |       | Suicide  |          |       | Suicide         |          |       | Suicide  |          |       |
|           | Num             | Rate     | × 100 | Num      | Rate     | × 100 | Num             | Rate     | × 100 | Num      | Rate     | × 100 |
|           | per year        | /100,000 |       | per year | /100,000 |       | per year        | /100,000 |       | per year | /100,000 |       |
|           | Total (>10 y/o) |          |       | 45–54    |          |       | Total (>10 y/o) |          |       | 45–54    |          |       |
| 1983–1987 | 26.8            | 34.9     | 112.1 | 7.4      | 60.4     | 119.4 | 11.8            | 14.7     | 96.5  | 1.4      | 14.7     | 85.2  |
| 1988–1992 | 23.2            | 25.6     | 109.0 | 5.0      | 34.7     | 101.0 | 10.6            | 11.6     | 87.1  | 2.0      | 14.3     | 97.9  |
| 1993–1997 | 31.2            | 28.6     | 121.5 | 6.6      | 36.2     | 99.0  | 12.4            | 10.7     | 99.4  | 2.6      | 13.6     | 105.2 |
| 1998–2002 | 48.0            | 39.9     | 116.6 | 15.2     | 71.4     | 127.6 | 15.6            | 12.5     | 97.4  | 2.4      | 13.5     | 90.0  |
| 2003–2007 | 49.6            | 39.2     | 112.5 | 11.0     | 60.7     | 108.6 | 11.4            | 10.7     | 76.5  | 0.8      | 9.1      | 66.4  |
| 2008–2012 | 45.0            | 34.9     | 105.8 | 9.2      | 56.2     | 115.7 | 13.6            | 11.4     | 84.2  | 1.6      | 12.4     | 83.2  |
| -----     |                 |          |       |          |          |       |                 |          |       |          |          |       |
|           | 15–24           |          |       | 55–64    |          |       | 15–24           |          |       | 55–64    |          |       |
| 1983–1987 | 2.0             | 15.0     | 107.9 | 4.4      | 49.5     | 116.5 | 0.2             | 4.9      | 72.1  | 2.6      | 23.3     | 118.2 |
| 1988–1992 | 1.0             | 8.4      | 85.1  | 3.8      | 36.3     | 102.3 | 0.4             | 4.2      | 79.0  | 1.6      | 16.3     | 91.4  |
| 1993–1997 | 1.8             | 10.8     | 95.6  | 8.0      | 56.6     | 140.6 | 0.4             | 3.9      | 75.4  | 1.8      | 15.0     | 94.3  |
| 1998–2002 | 1.8             | 13.1     | 82.8  | 12.2     | 78.3     | 123.2 | 1.2             | 7.1      | 100.7 | 2.8      | 18.7     | 99.4  |
| 2003–2007 | 1.6             | 14.0     | 80.1  | 14.4     | 74.5     | 129.0 | 1.0             | 7.8      | 86.4  | 2.2      | 14.4     | 85.9  |
| 2008–2012 | 3.2             | 22.7     | 107.1 | 10.0     | 50.3     | 103.5 | 0.8             | 7.8      | 80.5  | 3.4      | 15.8     | 105.8 |
| -----     |                 |          |       |          |          |       |                 |          |       |          |          |       |
|           | 25–34           |          |       | 65–74    |          |       | 25–34           |          |       | 65–74    |          |       |
| 1983–1987 | 2.6             | 21.6     | 84.7  | 3.2      | 58.7     | 134.1 | 1.8             | 11.7     | 108.7 | 2.0      | 31.3     | 100.3 |
| 1988–1992 | 1.4             | 14.2     | 74.3  | 1.8      | 33.9     | 96.1  | 1.2             | 8.8      | 101.8 | 1.2      | 19.5     | 74.6  |
| 1993–1997 | 3.6             | 22.7     | 116.4 | 4.4      | 48.3     | 151.4 | 1.4             | 8.9      | 106.6 | 1.8      | 19.2     | 98.7  |
| 1998–2002 | 4.0             | 23.9     | 88.5  | 5.2      | 52.1     | 114.6 | 3.0             | 14.0     | 121.1 | 1.6      | 17.6     | 83.8  |
| 2003–2007 | 6.6             | 32.3     | 104.0 | 5.4      | 47.6     | 110.9 | 1.6             | 10.4     | 79.8  | 2.6      | 19.8     | 106.6 |
| 2008–2012 | 4.2             | 26.5     | 81.4  | 6.2      | 44.9     | 113.6 | 1.8             | 11.7     | 82.0  | 2.0      | 15.9     | 89.5  |
| -----     |                 |          |       |          |          |       |                 |          |       |          |          |       |
|           | 35–44           |          |       | >74 y/o  |          |       | 35–44           |          |       | >74 y/o  |          |       |
| 1983–1987 | 6.4             | 35.9     | 112.9 | 0.8      | 55.3     | 70.5  | 2.2             | 12.3     | 104.5 | 1.4      | 44.2     | 76.6  |
| 1988–1992 | 7.2             | 33.9     | 142.9 | 2.8      | 77.7     | 120.5 | 2.4             | 11.2     | 116.1 | 1.8      | 34.9     | 72.9  |
| 1993–1997 | 4.8             | 26.9     | 109.8 | 2.0      | 52.2     | 100.3 | 1.6             | 8.9      | 104.3 | 2.6      | 33.7     | 97.9  |
| 1998–2002 | 7.2             | 42.2     | 120.0 | 2.0      | 45.7     | 86.6  | 1.6             | 10.1     | 97.7  | 2.8      | 28.9     | 93.2  |
| 2003–2007 | 6.8             | 40.2     | 100.4 | 3.6      | 52.0     | 115.4 | 2.0             | 12.3     | 97.7  | 1.2      | 13.0     | 57.9  |
| 2008–2012 | 7.6             | 36.8     | 99.0  | 4.6      | 51.1     | 123.2 | 2.2             | 12.4     | 91.1  | 1.8      | 14.6     | 76.1  |

Secondary Medical Zone ID: 283

|           | Male            |          |       |          |          |       | Female          |          |       |          |          |       |
|-----------|-----------------|----------|-------|----------|----------|-------|-----------------|----------|-------|----------|----------|-------|
|           | Suicide         |          |       | Suicide  |          |       | Suicide         |          |       | Suicide  |          |       |
|           | Num             | Rate     | × 100 | Num      | Rate     | × 100 | Num             | Rate     | × 100 | Num      | Rate     | × 100 |
|           | per year        | /100,000 |       | per year | /100,000 |       | per year        | /100,000 |       | per year | /100,000 |       |
|           | Total (>10 y/o) |          |       | 45–54    |          |       | Total (>10 y/o) |          |       | 45–54    |          |       |
| 1983–1987 | 14.6            | 32.9     | 98.5  | 4.2      | 55.5     | 109.7 | 5.8             | 13.8     | 81.5  | 0.6      | 13.7     | 79.8  |
| 1988–1992 | 13.8            | 25.4     | 104.6 | 3.8      | 40.1     | 116.8 | 8.4             | 12.8     | 100.4 | 1.2      | 14.2     | 96.8  |
| 1993–1997 | 17.8            | 26.6     | 113.1 | 4.2      | 38.4     | 105.1 | 8.2             | 10.9     | 100.1 | 0.6      | 10.1     | 78.3  |
| 1998–2002 | 25.2            | 36.6     | 104.0 | 4.8      | 47.5     | 84.9  | 11.4            | 13.0     | 106.7 | 2.8      | 18.0     | 119.7 |
| 2003–2007 | 26.0            | 36.4     | 103.4 | 6.6      | 62.9     | 112.4 | 10.0            | 12.7     | 97.4  | 1.6      | 13.9     | 101.2 |
| 2008–2012 | 25.2            | 35.1     | 105.3 | 3.8      | 46.1     | 94.9  | 9.0             | 12.0     | 91.3  | 0.6      | 11.5     | 77.3  |
| -----     |                 |          |       |          |          |       |                 |          |       |          |          |       |
|           | 15–24           |          |       | 55–64    |          |       | 15–24           |          |       | 55–64    |          |       |
| 1983–1987 | 0.8             | 12.1     | 86.8  | 2.0      | 36.7     | 86.3  | 0.4             | 6.3      | 92.8  | 0.8      | 16.7     | 84.7  |
| 1988–1992 | 0.6             | 8.9      | 90.0  | 2.4      | 33.7     | 95.0  | 0.6             | 5.5      | 105.2 | 1.8      | 19.4     | 108.5 |
| 1993–1997 | 0.6             | 9.5      | 83.7  | 4.8      | 50.9     | 126.4 | 0.8             | 5.9      | 113.0 | 1.0      | 14.0     | 87.9  |
| 1998–2002 | 2.2             | 18.2     | 115.3 | 6.2      | 66.0     | 103.8 | 1.0             | 7.8      | 110.7 | 1.4      | 17.1     | 90.9  |
| 2003–2007 | 3.4             | 24.7     | 141.8 | 5.6      | 53.3     | 92.3  | 0.8             | 8.7      | 96.6  | 1.4      | 14.9     | 88.8  |
| 2008–2012 | 1.6             | 21.2     | 100.0 | 5.6      | 48.4     | 99.7  | 0.2             | 6.9      | 71.6  | 1.6      | 14.0     | 93.8  |
| -----     |                 |          |       |          |          |       |                 |          |       |          |          |       |
|           | 25–34           |          |       | 65–74    |          |       | 25–34           |          |       | 65–74    |          |       |
| 1983–1987 | 2.0             | 27.3     | 106.6 | 0.6      | 32.9     | 75.1  | 0.6             | 9.7      | 90.5  | 1.2      | 30.1     | 96.4  |
| 1988–1992 | 1.2             | 19.4     | 101.6 | 1.4      | 33.5     | 95.1  | 1.2             | 10.9     | 126.0 | 1.0      | 22.2     | 85.2  |
| 1993–1997 | 2.0             | 23.7     | 121.4 | 2.6      | 37.8     | 118.4 | 1.0             | 9.6      | 114.8 | 1.8      | 22.6     | 116.1 |
| 1998–2002 | 2.8             | 30.5     | 113.0 | 3.4      | 47.3     | 104.0 | 0.8             | 10.8     | 93.1  | 2.4      | 24.8     | 118.2 |
| 2003–2007 | 2.0             | 27.6     | 89.1  | 3.0      | 41.4     | 96.6  | 1.6             | 14.5     | 111.6 | 1.8      | 19.4     | 104.1 |
| 2008–2012 | 3.6             | 37.2     | 114.3 | 4.2      | 44.0     | 111.5 | 1.0             | 13.4     | 93.5  | 2.0      | 19.0     | 106.6 |
| -----     |                 |          |       |          |          |       |                 |          |       |          |          |       |
|           | 35–44           |          |       | >74 y/o  |          |       | 35–44           |          |       | >74 y/o  |          |       |
| 1983–1987 | 2.6             | 30.1     | 94.5  | 2.4      | 108.5    | 138.5 | 0.8             | 10.5     | 88.8  | 1.4      | 55.4     | 96.1  |
| 1988–1992 | 2.6             | 25.3     | 106.6 | 1.8      | 69.2     | 107.2 | 1.0             | 9.5      | 98.8  | 1.6      | 42.4     | 88.6  |
| 1993–1997 | 1.8             | 21.5     | 87.8  | 1.8      | 56.7     | 109.0 | 1.2             | 9.6      | 113.1 | 1.6      | 31.6     | 91.8  |
| 1998–2002 | 3.4             | 38.0     | 107.9 | 2.2      | 54.4     | 103.1 | 0.8             | 9.6      | 92.7  | 2.2      | 32.0     | 103.0 |
| 2003–2007 | 2.0             | 30.9     | 77.1  | 3.2      | 53.4     | 118.7 | 1.4             | 13.5     | 106.9 | 1.4      | 17.9     | 79.7  |
| 2008–2012 | 3.4             | 38.0     | 102.2 | 3.0      | 44.3     | 106.8 | 1.4             | 13.9     | 102.6 | 2.2      | 19.8     | 103.2 |

Secondary Medical Zone ID: 284

|           | Male            |          |       |          |          |       | Female          |          |       |          |          |       |
|-----------|-----------------|----------|-------|----------|----------|-------|-----------------|----------|-------|----------|----------|-------|
|           | Suicide         |          |       | Suicide  |          |       | Suicide         |          |       | Suicide  |          |       |
|           | Num             | Rate     | × 100 | Num      | Rate     | × 100 | Num             | Rate     | × 100 | Num      | Rate     | × 100 |
|           | per year        | /100,000 |       | per year | /100,000 |       | per year        | /100,000 |       | per year | /100,000 |       |
|           | Total (>10 y/o) |          |       | 45–54    |          |       | Total (>10 y/o) |          |       | 45–54    |          |       |
| 1983–1987 | 33.6            | 31.7     | 96.9  | 11.0     | 59.3     | 117.3 | 15.8            | 14.2     | 91.4  | 4.0      | 19.8     | 114.9 |
| 1988–1992 | 32.4            | 25.0     | 102.3 | 9.8      | 43.0     | 125.1 | 14.0            | 10.8     | 79.2  | 2.6      | 13.0     | 89.2  |
| 1993–1997 | 42.0            | 26.3     | 108.6 | 12.6     | 44.2     | 120.8 | 19.8            | 11.1     | 104.2 | 4.6      | 15.0     | 115.9 |
| 1998–2002 | 64.6            | 36.9     | 103.4 | 20.8     | 68.2     | 121.9 | 20.6            | 11.5     | 85.9  | 5.0      | 15.7     | 104.4 |
| 2003–2007 | 70.6            | 37.9     | 105.6 | 16.8     | 61.7     | 110.3 | 23.0            | 11.8     | 90.4  | 3.8      | 13.4     | 97.8  |
| 2008–2012 | 59.2            | 32.7     | 93.1  | 12.2     | 48.9     | 100.5 | 20.6            | 10.7     | 80.5  | 2.2      | 10.6     | 71.1  |
| -----     |                 |          |       |          |          |       |                 |          |       |          |          |       |
|           | 15–24           |          |       | 55–64    |          |       | 15–24           |          |       | 55–64    |          |       |
| 1983–1987 | 2.2             | 11.7     | 83.9  | 4.2      | 38.5     | 90.7  | 1.0             | 5.8      | 84.9  | 1.8      | 16.7     | 84.4  |
| 1988–1992 | 1.0             | 6.3      | 63.7  | 6.6      | 40.7     | 114.7 | 0.8             | 4.0      | 75.7  | 3.4      | 19.4     | 108.5 |
| 1993–1997 | 2.4             | 9.2      | 81.6  | 10.4     | 51.9     | 128.8 | 1.6             | 5.3      | 101.3 | 4.4      | 20.0     | 125.8 |
| 1998–2002 | 4.0             | 14.3     | 90.5  | 14.6     | 66.4     | 104.6 | 2.0             | 7.1      | 100.6 | 3.0      | 15.5     | 82.3  |
| 2003–2007 | 4.4             | 17.2     | 98.7  | 19.2     | 69.9     | 121.2 | 1.6             | 7.3      | 81.1  | 4.6      | 16.4     | 98.1  |
| 2008–2012 | 3.6             | 17.9     | 84.5  | 13.6     | 47.5     | 97.9  | 1.0             | 6.4      | 65.8  | 5.2      | 16.0     | 107.0 |
| -----     |                 |          |       |          |          |       |                 |          |       |          |          |       |
|           | 25–34           |          |       | 65–74    |          |       | 25–34           |          |       | 65–74    |          |       |
| 1983–1987 | 5.0             | 24.3     | 95.0  | 1.8      | 37.5     | 85.7  | 2.8             | 11.6     | 107.3 | 1.8      | 27.0     | 86.3  |
| 1988–1992 | 3.4             | 16.7     | 87.4  | 3.0      | 37.3     | 105.8 | 2.6             | 10.0     | 115.3 | 1.0      | 15.5     | 59.2  |
| 1993–1997 | 4.8             | 19.2     | 98.3  | 3.2      | 30.3     | 95.0  | 2.6             | 9.1      | 108.8 | 2.4      | 18.8     | 96.2  |
| 1998–2002 | 6.2             | 22.6     | 83.8  | 5.8      | 42.7     | 93.8  | 2.4             | 9.2      | 79.2  | 3.0      | 19.5     | 92.6  |
| 2003–2007 | 6.6             | 24.3     | 78.3  | 8.6      | 49.4     | 115.0 | 5.0             | 14.8     | 114.1 | 3.4      | 18.3     | 98.0  |
| 2008–2012 | 9.6             | 35.5     | 109.1 | 7.4      | 38.4     | 97.3  | 3.0             | 12.1     | 84.2  | 2.4      | 13.9     | 77.9  |
| -----     |                 |          |       |          |          |       |                 |          |       |          |          |       |
|           | 35–44           |          |       | >74 y/o  |          |       | 35–44           |          |       | >74 y/o  |          |       |
| 1983–1987 | 7.8             | 31.2     | 98.0  | 1.4      | 62.1     | 79.3  | 2.8             | 11.2     | 94.4  | 1.6      | 41.3     | 71.6  |
| 1988–1992 | 5.6             | 21.1     | 88.9  | 2.8      | 68.1     | 105.6 | 1.6             | 7.3      | 75.9  | 2.0      | 31.4     | 65.5  |
| 1993–1997 | 5.8             | 22.3     | 90.8  | 2.0      | 43.4     | 83.4  | 2.2             | 8.1      | 95.6  | 1.8      | 21.6     | 62.9  |
| 1998–2002 | 10.2            | 38.3     | 108.7 | 2.6      | 42.0     | 79.7  | 3.2             | 11.1     | 107.8 | 2.0      | 18.7     | 60.2  |
| 2003–2007 | 11.4            | 41.3     | 103.1 | 3.6      | 39.6     | 87.9  | 2.8             | 10.7     | 84.7  | 1.8      | 13.1     | 58.5  |
| 2008–2012 | 8.4             | 29.7     | 79.8  | 4.4      | 36.6     | 88.2  | 3.6             | 11.8     | 87.3  | 3.2      | 16.3     | 84.7  |

Secondary Medical Zone ID: 285

|           | Male            |          |       |          |          |       | Female          |          |       |          |          |       |
|-----------|-----------------|----------|-------|----------|----------|-------|-----------------|----------|-------|----------|----------|-------|
|           | Suicide         |          |       | Suicide  |          |       | Suicide         |          |       | Suicide  |          |       |
|           | Num             | Rate     | × 100 | Num      | Rate     | × 100 | Num             | Rate     | × 100 | Num      | Rate     | × 100 |
|           | per year        | /100,000 |       | per year | /100,000 |       | per year        | /100,000 |       | per year | /100,000 |       |
|           | Total (>10 y/o) |          |       | 45–54    |          |       | Total (>10 y/o) |          |       | 45–54    |          |       |
| 1983–1987 | 15.2            | 36.1     | 118.9 | 4.2      | 64.2     | 126.9 | 6.6             | 14.6     | 93.2  | 1.0      | 16.8     | 97.6  |
| 1988–1992 | 12.4            | 26.9     | 119.6 | 3.2      | 45.2     | 131.6 | 4.4             | 11.1     | 76.7  | 0.6      | 13.5     | 92.4  |
| 1993–1997 | 11.4            | 26.5     | 106.9 | 1.4      | 30.5     | 83.3  | 4.8             | 10.1     | 87.1  | 0.6      | 11.9     | 92.4  |
| 1998–2002 | 17.4            | 37.7     | 109.5 | 5.2      | 64.7     | 115.7 | 4.8             | 11.4     | 81.4  | 0.8      | 14.0     | 93.2  |
| 2003–2007 | 19.2            | 39.5     | 119.2 | 4.2      | 62.1     | 111.0 | 6.2             | 12.6     | 96.8  | 0.4      | 11.8     | 85.9  |
| 2008–2012 | 15.0            | 35.6     | 104.9 | 3.2      | 54.5     | 112.2 | 5.2             | 12.2     | 92.1  | 0.4      | 13.0     | 87.1  |
| -----     |                 |          |       |          |          |       |                 |          |       |          |          |       |
|           | 15–24           |          |       | 55–64    |          |       | 15–24           |          |       | 55–64    |          |       |
| 1983–1987 | 1.2             | 17.1     | 122.9 | 2.0      | 41.4     | 97.4  | 0.4             | 6.9      | 101.2 | 1.2      | 19.7     | 99.9  |
| 1988–1992 | 1.0             | 11.7     | 118.2 | 2.6      | 41.2     | 115.9 | 0.4             | 5.6      | 106.6 | 0.8      | 16.1     | 90.3  |
| 1993–1997 | 0.0             | 8.7      | 77.3  | 2.8      | 45.4     | 112.9 | 0.2             | 4.8      | 92.6  | 1.2      | 17.0     | 106.7 |
| 1998–2002 | 1.0             | 16.4     | 103.7 | 3.2      | 61.2     | 96.4  | 0.0             | 5.6      | 79.5  | 1.0      | 18.1     | 96.3  |
| 2003–2007 | 0.8             | 17.2     | 98.7  | 4.8      | 66.8     | 115.8 | 0.2             | 7.7      | 86.1  | 1.4      | 17.7     | 105.9 |
| 2008–2012 | 0.8             | 21.0     | 98.9  | 3.6      | 49.0     | 100.9 | 0.4             | 9.7      | 99.7  | 1.0      | 14.5     | 97.4  |
| -----     |                 |          |       |          |          |       |                 |          |       |          |          |       |
|           | 25–34           |          |       | 65–74    |          |       | 25–34           |          |       | 65–74    |          |       |
| 1983–1987 | 1.8             | 27.6     | 108.0 | 1.6      | 47.2     | 107.9 | 0.6             | 10.5     | 97.4  | 1.2      | 29.7     | 94.9  |
| 1988–1992 | 0.8             | 18.2     | 95.4  | 1.4      | 36.8     | 104.3 | 0.0             | 6.7      | 77.8  | 0.6      | 19.2     | 73.6  |
| 1993–1997 | 2.0             | 27.2     | 139.3 | 1.6      | 34.1     | 107.0 | 0.2             | 7.5      | 89.7  | 1.0      | 18.6     | 95.2  |
| 1998–2002 | 1.8             | 29.9     | 110.6 | 2.2      | 45.5     | 100.1 | 0.4             | 10.8     | 93.3  | 1.2      | 20.4     | 97.1  |
| 2003–2007 | 1.8             | 32.4     | 104.6 | 3.2      | 53.6     | 124.9 | 0.8             | 13.6     | 104.9 | 0.8      | 16.7     | 89.9  |
| 2008–2012 | 2.4             | 37.8     | 116.0 | 1.2      | 34.2     | 86.7  | 0.4             | 13.2     | 91.9  | 1.0      | 17.6     | 99.0  |
| -----     |                 |          |       |          |          |       |                 |          |       |          |          |       |
|           | 35–44           |          |       | >74 y/o  |          |       | 35–44           |          |       | >74 y/o  |          |       |
| 1983–1987 | 3.6             | 42.9     | 134.6 | 0.8      | 57.9     | 73.9  | 1.4             | 14.3     | 121.3 | 0.8      | 35.1     | 60.8  |
| 1988–1992 | 2.8             | 31.3     | 132.0 | 0.6      | 43.6     | 67.6  | 0.8             | 10.2     | 105.2 | 1.2      | 33.8     | 70.7  |
| 1993–1997 | 3.0             | 35.4     | 144.5 | 0.6      | 36.1     | 69.2  | 0.4             | 7.9      | 93.4  | 1.2      | 26.4     | 76.8  |
| 1998–2002 | 2.2             | 38.2     | 108.4 | 1.8      | 53.9     | 102.3 | 0.0             | 7.8      | 75.3  | 1.4      | 24.9     | 80.3  |
| 2003–2007 | 2.4             | 45.1     | 112.6 | 1.8      | 45.6     | 101.2 | 1.2             | 15.0     | 118.9 | 1.4      | 20.0     | 89.2  |
| 2008–2012 | 1.8             | 37.1     | 99.8  | 2.0      | 43.3     | 104.4 | 0.6             | 13.3     | 97.8  | 1.4      | 17.9     | 93.3  |

Secondary Medical Zone ID: 286

|           | Male            |          |       |          |          |       | Female          |          |       |          |          |       |
|-----------|-----------------|----------|-------|----------|----------|-------|-----------------|----------|-------|----------|----------|-------|
|           | Suicide         |          |       | Suicide  |          |       | Suicide         |          |       | Suicide  |          |       |
|           | Num             | Rate     | × 100 | Num      | Rate     | × 100 | Num             | Rate     | × 100 | Num      | Rate     | × 100 |
|           | per year        | /100,000 |       | per year | /100,000 |       | per year        | /100,000 |       | per year | /100,000 |       |
|           | Total (>10 y/o) |          |       | 45–54    |          |       | Total (>10 y/o) |          |       | 45–54    |          |       |
| 1983–1987 | 56.8            | 33.3     | 102.8 | 16.0     | 57.8     | 114.3 | 28.6            | 14.2     | 90.6  | 5.8      | 18.5     | 107.5 |
| 1988–1992 | 47.2            | 25.2     | 103.9 | 10.6     | 37.4     | 109.0 | 22.2            | 10.7     | 76.4  | 4.8      | 15.1     | 103.2 |
| 1993–1997 | 60.4            | 29.1     | 120.3 | 14.2     | 42.9     | 117.3 | 26.6            | 10.8     | 97.7  | 5.8      | 15.4     | 119.6 |
| 1998–2002 | 86.2            | 40.1     | 115.4 | 22.2     | 65.1     | 116.3 | 28.2            | 11.8     | 88.1  | 6.2      | 16.7     | 110.9 |
| 2003–2007 | 83.4            | 40.2     | 109.7 | 18.0     | 59.9     | 107.1 | 31.0            | 12.3     | 98.0  | 6.0      | 17.0     | 124.0 |
| 2008–2012 | 76.2            | 37.0     | 108.1 | 15.4     | 56.5     | 116.2 | 27.6            | 12.7     | 90.6  | 5.4      | 17.5     | 117.1 |
| -----     |                 |          |       |          |          |       |                 |          |       |          |          |       |
|           | 15–24           |          |       | 55–64    |          |       | 15–24           |          |       | 55–64    |          |       |
| 1983–1987 | 5.2             | 17.0     | 121.5 | 7.2      | 36.3     | 85.4  | 1.8             | 6.3      | 92.9  | 4.4      | 18.2     | 92.3  |
| 1988–1992 | 3.4             | 10.1     | 102.4 | 9.8      | 38.9     | 109.4 | 2.4             | 6.6      | 124.7 | 3.4      | 13.9     | 78.1  |
| 1993–1997 | 4.2             | 12.0     | 105.8 | 10.2     | 39.7     | 98.7  | 1.8             | 5.4      | 102.6 | 4.0      | 14.2     | 89.3  |
| 1998–2002 | 6.2             | 18.4     | 116.5 | 20.0     | 73.1     | 115.1 | 2.4             | 7.5      | 107.0 | 5.2      | 17.6     | 93.5  |
| 2003–2007 | 4.2             | 15.9     | 91.2  | 21.8     | 69.6     | 120.7 | 1.2             | 6.1      | 67.6  | 5.4      | 16.3     | 97.2  |
| 2008–2012 | 4.4             | 19.4     | 91.7  | 16.2     | 49.4     | 101.6 | 2.2             | 9.6      | 98.5  | 3.8      | 12.4     | 83.0  |
| -----     |                 |          |       |          |          |       |                 |          |       |          |          |       |
|           | 25–34           |          |       | 65–74    |          |       | 25–34           |          |       | 65–74    |          |       |
| 1983–1987 | 7.8             | 26.7     | 104.6 | 4.4      | 38.9     | 89.0  | 4.4             | 13.0     | 120.4 | 3.8      | 24.3     | 77.6  |
| 1988–1992 | 5.4             | 20.3     | 106.2 | 4.8      | 34.4     | 97.6  | 1.8             | 7.2      | 82.7  | 3.0      | 17.2     | 65.9  |
| 1993–1997 | 7.8             | 26.3     | 134.7 | 6.8      | 36.6     | 114.7 | 2.8             | 9.0      | 108.5 | 3.8      | 16.9     | 86.9  |
| 1998–2002 | 9.0             | 29.7     | 110.1 | 11.2     | 51.4     | 112.9 | 4.4             | 13.1     | 113.1 | 3.8      | 16.1     | 76.8  |
| 2003–2007 | 9.6             | 32.6     | 105.0 | 7.8      | 36.4     | 84.9  | 3.8             | 12.6     | 97.0  | 6.4      | 21.6     | 116.2 |
| 2008–2012 | 9.8             | 36.6     | 112.5 | 7.8      | 34.8     | 88.1  | 4.4             | 15.6     | 109.1 | 4.0      | 15.3     | 85.9  |
| -----     |                 |          |       |          |          |       |                 |          |       |          |          |       |
|           | 35–44           |          |       | >74 y/o  |          |       | 35–44           |          |       | >74 y/o  |          |       |
| 1983–1987 | 12.4            | 37.4     | 117.5 | 3.8      | 57.4     | 73.2  | 4.4             | 12.4     | 104.9 | 4.0      | 36.7     | 63.6  |
| 1988–1992 | 9.8             | 28.1     | 118.7 | 3.2      | 41.9     | 64.9  | 2.8             | 8.6      | 89.1  | 4.0      | 27.6     | 57.7  |
| 1993–1997 | 11.0            | 33.9     | 138.3 | 5.8      | 57.4     | 110.2 | 3.6             | 10.3     | 120.9 | 4.8      | 26.2     | 76.1  |
| 1998–2002 | 11.8            | 41.5     | 117.8 | 5.6      | 47.8     | 90.7  | 2.0             | 8.1      | 78.4  | 4.2      | 19.6     | 63.2  |
| 2003–2007 | 15.8            | 55.3     | 138.1 | 6.2      | 41.0     | 90.9  | 2.4             | 9.9      | 78.6  | 5.4      | 19.4     | 86.6  |
| 2008–2012 | 13.4            | 44.1     | 118.6 | 9.2      | 47.2     | 113.8 | 3.2             | 11.8     | 87.2  | 4.4      | 14.2     | 73.8  |

Secondary Medical Zone ID: 287

|           | Male            |          |       |          |          |       | Female          |          |       |          |          |       |
|-----------|-----------------|----------|-------|----------|----------|-------|-----------------|----------|-------|----------|----------|-------|
|           | Suicide         |          |       | Suicide  |          |       | Suicide         |          |       | Suicide  |          |       |
|           | Num             | Rate     | × 100 | Num      | Rate     | × 100 | Num             | Rate     | × 100 | Num      | Rate     | × 100 |
|           | per year        | /100,000 |       | per year | /100,000 |       | per year        | /100,000 |       | per year | /100,000 |       |
|           | Total (>10 y/o) |          |       | 45–54    |          |       | Total (>10 y/o) |          |       | 45–54    |          |       |
| 1983–1987 | 24.4            | 36.8     | 121.5 | 4.8      | 51.8     | 102.5 | 9.8             | 14.4     | 89.3  | 1.8      | 17.4     | 100.8 |
| 1988–1992 | 19.2            | 28.1     | 119.6 | 4.8      | 46.1     | 134.3 | 9.4             | 12.2     | 91.6  | 1.6      | 15.3     | 104.4 |
| 1993–1997 | 20.6            | 28.5     | 121.5 | 5.4      | 46.3     | 126.5 | 9.4             | 11.0     | 101.1 | 1.2      | 12.6     | 97.3  |
| 1998–2002 | 28.6            | 39.6     | 117.0 | 8.2      | 69.8     | 124.7 | 10.8            | 12.7     | 100.4 | 1.8      | 15.8     | 104.9 |
| 2003–2007 | 36.6            | 46.7     | 146.7 | 10.6     | 94.0     | 168.0 | 9.4             | 12.3     | 96.0  | 1.2      | 13.3     | 96.7  |
| 2008–2012 | 29.8            | 38.2     | 128.2 | 5.8      | 60.1     | 123.7 | 8.8             | 13.0     | 94.8  | 1.2      | 14.6     | 97.9  |
|           | 15–24           |          |       | 55–64    |          |       | 15–24           |          |       | 55–64    |          |       |
| 1983–1987 | 1.2             | 13.9     | 99.9  | 4.2      | 47.7     | 112.2 | 0.2             | 5.4      | 79.0  | 1.4      | 17.5     | 88.5  |
| 1988–1992 | 1.2             | 11.0     | 111.2 | 4.0      | 40.6     | 114.3 | 0.2             | 4.3      | 82.3  | 1.2      | 15.3     | 85.7  |
| 1993–1997 | 1.2             | 12.0     | 105.8 | 4.8      | 48.4     | 120.1 | 0.6             | 5.6      | 107.6 | 2.0      | 17.7     | 111.4 |
| 1998–2002 | 2.4             | 20.3     | 128.2 | 5.8      | 66.8     | 105.2 | 0.4             | 6.4      | 90.8  | 2.2      | 20.3     | 107.8 |
| 2003–2007 | 2.0             | 20.3     | 116.6 | 6.6      | 65.7     | 113.7 | 0.2             | 6.9      | 76.5  | 2.4      | 19.2     | 114.4 |
| 2008–2012 | 1.0             | 19.2     | 90.4  | 6.6      | 56.4     | 116.2 | 1.0             | 11.5     | 118.7 | 1.6      | 15.0     | 100.3 |
|           | 25–34           |          |       | 65–74    |          |       | 25–34           |          |       | 65–74    |          |       |
| 1983–1987 | 4.6             | 38.3     | 149.8 | 1.6      | 38.9     | 88.9  | 1.2             | 11.5     | 107.2 | 1.8      | 29.0     | 92.8  |
| 1988–1992 | 3.6             | 31.7     | 166.1 | 1.6      | 31.9     | 90.5  | 1.4             | 11.2     | 128.6 | 1.2      | 20.0     | 76.6  |
| 1993–1997 | 3.0             | 28.2     | 144.4 | 1.8      | 28.5     | 89.4  | 0.8             | 8.8      | 105.2 | 1.0      | 15.0     | 76.9  |
| 1998–2002 | 2.8             | 30.7     | 113.8 | 2.6      | 38.9     | 85.6  | 1.0             | 11.7     | 101.0 | 2.0      | 21.0     | 100.0 |
| 2003–2007 | 4.8             | 45.1     | 145.3 | 4.2      | 49.6     | 115.7 | 0.8             | 12.0     | 92.6  | 2.2      | 20.6     | 110.7 |
| 2008–2012 | 2.0             | 31.0     | 95.1  | 4.8      | 51.5     | 130.3 | 0.8             | 13.4     | 93.2  | 1.2      | 16.2     | 90.8  |
|           | 35–44           |          |       | >74 y/o  |          |       | 35–44           |          |       | >74 y/o  |          |       |
| 1983–1987 | 5.4             | 45.4     | 142.6 | 2.6      | 78.7     | 100.5 | 1.0             | 11.2     | 94.9  | 2.4      | 50.0     | 86.7  |
| 1988–1992 | 3.0             | 26.5     | 112.0 | 1.0      | 41.4     | 64.2  | 1.4             | 10.9     | 112.9 | 2.4      | 39.4     | 82.3  |
| 1993–1997 | 2.8             | 27.1     | 110.5 | 1.6      | 44.5     | 85.5  | 1.2             | 9.9      | 116.7 | 2.6      | 34.3     | 99.6  |
| 1998–2002 | 4.2             | 43.2     | 122.6 | 2.6      | 53.3     | 101.1 | 0.8             | 9.9      | 96.2  | 2.4      | 27.4     | 88.2  |
| 2003–2007 | 4.4             | 50.2     | 125.2 | 4.0      | 57.7     | 128.1 | 1.0             | 12.4     | 98.5  | 1.6      | 16.7     | 74.3  |
| 2008–2012 | 3.6             | 40.7     | 109.4 | 6.0      | 66.4     | 159.9 | 1.6             | 15.2     | 112.4 | 1.4      | 14.0     | 72.8  |



Secondary Medical Zone ID: 288

|           | Male            |                  |       |                 |                  |       | Female          |                  |       |                 |                  |       |
|-----------|-----------------|------------------|-------|-----------------|------------------|-------|-----------------|------------------|-------|-----------------|------------------|-------|
|           | Suicide         |                  |       | Suicide         |                  |       | Suicide         |                  |       | Suicide         |                  |       |
|           | Num<br>per year | Rate<br>/100,000 | × 100 | Num<br>per year | Rate<br>/100,000 | × 100 | Num<br>per year | Rate<br>/100,000 | × 100 | Num<br>per year | Rate<br>/100,000 | × 100 |
|           |                 |                  |       |                 |                  |       |                 |                  |       |                 |                  |       |
|           | Total (>10 y/o) |                  |       | 45–54           |                  |       | Total (>10 y/o) |                  |       | 45–54           |                  |       |
| 1983–1987 | 40.0            | 34.2             | 104.1 | 9.0             | 50.0             | 98.9  | 15.4            | 12.4             | 71.1  | 2.8             | 14.9             | 86.3  |
| 1988–1992 | 31.8            | 26.8             | 105.2 | 8.2             | 43.8             | 127.6 | 18.2            | 11.9             | 87.0  | 3.6             | 16.5             | 112.8 |
| 1993–1997 | 36.6            | 28.7             | 116.3 | 9.2             | 44.6             | 122.0 | 15.8            | 10.2             | 88.2  | 2.6             | 12.9             | 99.6  |
| 1998–2002 | 49.4            | 39.0             | 111.9 | 15.6            | 74.6             | 133.3 | 17.0            | 12.0             | 85.5  | 4.2             | 17.9             | 119.0 |
| 2003–2007 | 49.6            | 41.2             | 116.4 | 11.8            | 68.3             | 122.1 | 14.8            | 11.3             | 83.9  | 3.2             | 15.9             | 116.2 |
| 2008–2012 | 42.0            | 37.2             | 110.4 | 9.8             | 63.6             | 130.8 | 14.4            | 11.9             | 87.5  | 1.8             | 13.6             | 91.4  |
|           | 15–24           |                  |       | 55–64           |                  |       | 15–24           |                  |       | 55–64           |                  |       |
| 1983–1987 | 5.0             | 23.7             | 170.2 | 4.6             | 32.5             | 76.5  | 0.2             | 4.1              | 60.0  | 2.2             | 13.9             | 70.3  |
| 1988–1992 | 1.8             | 10.4             | 105.2 | 3.8             | 25.6             | 72.0  | 0.4             | 3.9              | 73.2  | 3.4             | 16.7             | 93.7  |
| 1993–1997 | 2.4             | 13.0             | 115.0 | 8.6             | 48.1             | 119.4 | 0.8             | 4.9              | 94.7  | 2.6             | 14.0             | 88.2  |
| 1998–2002 | 2.0             | 14.8             | 93.6  | 10.8            | 65.8             | 103.6 | 1.2             | 7.3              | 104.5 | 3.2             | 17.8             | 94.6  |
| 2003–2007 | 2.8             | 19.6             | 112.1 | 10.6            | 58.9             | 102.1 | 0.2             | 5.5              | 61.0  | 3.0             | 16.0             | 95.7  |
| 2008–2012 | 1.6             | 18.5             | 87.3  | 12.4            | 60.1             | 123.7 | 0.8             | 8.7              | 89.5  | 1.0             | 10.1             | 67.6  |
|           | 25–34           |                  |       | 65–74           |                  |       | 25–34           |                  |       | 65–74           |                  |       |
| 1983–1987 | 5.0             | 27.4             | 107.1 | 4.4             | 43.5             | 99.3  | 2.8             | 13.0             | 120.5 | 2.0             | 19.0             | 60.8  |
| 1988–1992 | 6.0             | 33.4             | 174.5 | 3.4             | 31.3             | 88.7  | 1.6             | 9.2              | 106.6 | 3.0             | 20.1             | 77.0  |
| 1993–1997 | 3.0             | 21.4             | 109.7 | 3.8             | 29.3             | 91.9  | 1.4             | 8.8              | 105.8 | 2.4             | 14.6             | 75.0  |
| 1998–2002 | 5.2             | 33.9             | 125.7 | 5.8             | 41.9             | 92.1  | 0.6             | 8.5              | 73.4  | 3.0             | 17.2             | 81.9  |
| 2003–2007 | 4.6             | 34.6             | 111.7 | 7.4             | 49.2             | 114.6 | 0.8             | 10.0             | 76.7  | 3.0             | 17.0             | 91.2  |
| 2008–2012 | 2.4             | 27.4             | 84.2  | 5.4             | 38.8             | 98.3  | 2.0             | 15.6             | 108.8 | 2.4             | 15.6             | 87.9  |
|           | 35–44           |                  |       | >74 y/o         |                  |       | 35–44           |                  |       | >74 y/o         |                  |       |
| 1983–1987 | 8.8             | 41.0             | 129.0 | 3.0             | 56.2             | 71.8  | 3.0             | 13.1             | 111.2 | 2.4             | 30.0             | 52.0  |
| 1988–1992 | 6.4             | 29.6             | 124.9 | 1.8             | 33.5             | 51.9  | 2.8             | 11.5             | 119.1 | 3.4             | 29.7             | 62.1  |
| 1993–1997 | 7.0             | 35.9             | 146.5 | 2.6             | 35.8             | 68.7  | 2.4             | 10.9             | 128.7 | 3.6             | 25.3             | 73.4  |
| 1998–2002 | 5.4             | 36.9             | 104.8 | 4.4             | 47.1             | 89.3  | 1.8             | 11.0             | 106.3 | 3.0             | 18.5             | 59.5  |
| 2003–2007 | 7.2             | 51.9             | 129.6 | 5.2             | 45.2             | 100.3 | 1.4             | 11.6             | 91.5  | 3.2             | 15.8             | 70.5  |
| 2008–2012 | 6.4             | 44.6             | 119.9 | 4.0             | 33.7             | 81.3  | 1.2             | 11.9             | 87.5  | 5.2             | 20.7             | 107.4 |

Secondary Medical Zone ID: 289

|           | Male            |                  |       |                 |                  |       | Female          |                  |       |                 |                  |       |
|-----------|-----------------|------------------|-------|-----------------|------------------|-------|-----------------|------------------|-------|-----------------|------------------|-------|
|           | Suicide         |                  |       | Suicide         |                  |       | Suicide         |                  |       | Suicide         |                  |       |
|           | Num<br>per year | Rate<br>/100,000 | × 100 | Num<br>per year | Rate<br>/100,000 | × 100 | Num<br>per year | Rate<br>/100,000 | × 100 | Num<br>per year | Rate<br>/100,000 | × 100 |
|           |                 |                  |       |                 |                  |       |                 |                  |       |                 |                  |       |
|           | Total (>10 y/o) |                  |       | 45–54           |                  |       | Total (>10 y/o) |                  |       | 45–54           |                  |       |
| 1983–1987 | 38.0            | 40.2             | 138.7 | 8.6             | 65.7             | 130.0 | 14.8            | 14.6             | 92.6  | 2.4             | 17.1             | 99.2  |
| 1988–1992 | 31.2            | 30.8             | 139.7 | 6.8             | 49.1             | 143.0 | 14.8            | 12.7             | 97.9  | 2.8             | 16.9             | 115.8 |
| 1993–1997 | 30.4            | 29.7             | 129.3 | 6.4             | 41.8             | 114.1 | 11.4            | 10.3             | 89.0  | 2.8             | 15.3             | 118.1 |
| 1998–2002 | 53.0            | 47.8             | 153.4 | 14.8            | 84.0             | 150.0 | 17.0            | 13.2             | 108.5 | 2.8             | 16.0             | 106.3 |
| 2003–2007 | 48.4            | 47.2             | 143.9 | 14.4            | 97.6             | 174.6 | 16.0            | 13.7             | 109.1 | 3.6             | 18.8             | 137.3 |
| 2008–2012 | 44.0            | 41.5             | 139.5 | 7.8             | 65.5             | 134.8 | 14.0            | 12.5             | 102.0 | 1.6             | 14.7             | 98.6  |
|           | 15–24           |                  |       | 55–64           |                  |       | 15–24           |                  |       | 55–64           |                  |       |
| 1983–1987 | 1.2             | 12.4             | 89.1  | 9.6             | 71.9             | 169.2 | 1.0             | 7.5              | 110.5 | 1.8             | 15.7             | 79.7  |
| 1988–1992 | 1.0             | 8.9              | 89.6  | 8.0             | 56.7             | 159.8 | 0.4             | 4.6              | 86.3  | 2.4             | 17.2             | 96.2  |
| 1993–1997 | 0.6             | 8.1              | 71.3  | 6.0             | 47.9             | 118.9 | 0.6             | 5.0              | 95.2  | 2.6             | 17.3             | 108.7 |
| 1998–2002 | 2.4             | 16.2             | 102.6 | 12.0            | 92.1             | 145.0 | 1.0             | 7.4              | 105.9 | 3.0             | 20.1             | 106.9 |
| 2003–2007 | 2.4             | 18.2             | 104.5 | 10.2            | 70.2             | 121.6 | 1.2             | 10.0             | 111.3 | 3.6             | 19.7             | 117.9 |
| 2008–2012 | 1.2             | 16.8             | 79.3  | 11.4            | 64.2             | 132.2 | 0.8             | 9.5              | 97.7  | 1.8             | 13.1             | 88.0  |
|           | 25–34           |                  |       | 65–74           |                  |       | 25–34           |                  |       | 65–74           |                  |       |
| 1983–1987 | 4.8             | 31.8             | 124.6 | 3.6             | 48.3             | 110.4 | 2.2             | 13.0             | 120.4 | 2.8             | 28.6             | 91.4  |
| 1988–1992 | 2.8             | 23.0             | 120.4 | 2.6             | 34.2             | 97.2  | 1.6             | 10.6             | 122.1 | 3.4             | 27.9             | 107.0 |
| 1993–1997 | 2.4             | 21.7             | 111.2 | 4.4             | 42.4             | 132.8 | 0.6             | 7.4              | 88.8  | 1.6             | 14.7             | 75.6  |
| 1998–2002 | 4.4             | 33.6             | 124.6 | 7.6             | 64.1             | 140.9 | 0.8             | 10.1             | 86.8  | 2.8             | 20.8             | 99.2  |
| 2003–2007 | 3.4             | 30.5             | 98.5  | 7.2             | 61.5             | 143.3 | 1.4             | 12.7             | 98.0  | 2.4             | 18.4             | 98.6  |
| 2008–2012 | 3.2             | 31.7             | 97.3  | 5.8             | 50.1             | 126.8 | 0.8             | 11.9             | 82.7  | 3.2             | 21.0             | 118.0 |
|           | 35–44           |                  |       | >74 y/o         |                  |       | 35–44           |                  |       | >74 y/o         |                  |       |
| 1983–1987 | 5.8             | 37.2             | 116.8 | 4.4             | 102.5            | 130.8 | 1.8             | 11.7             | 99.2  | 2.8             | 47.2             | 81.8  |
| 1988–1992 | 5.4             | 30.5             | 128.8 | 4.6             | 84.3             | 130.7 | 1.4             | 9.2              | 95.0  | 2.8             | 34.9             | 72.9  |
| 1993–1997 | 6.2             | 38.6             | 157.3 | 4.4             | 71.8             | 137.8 | 1.4             | 9.1              | 106.6 | 1.8             | 20.0             | 58.2  |
| 1998–2002 | 7.0             | 54.2             | 153.9 | 4.8             | 68.5             | 129.9 | 1.6             | 11.8             | 114.0 | 5.0             | 37.3             | 120.0 |
| 2003–2007 | 6.0             | 55.6             | 138.7 | 4.4             | 53.4             | 118.6 | 1.4             | 13.1             | 103.5 | 2.2             | 16.0             | 71.2  |
| 2008–2012 | 7.8             | 55.8             | 150.1 | 6.8             | 64.4             | 155.2 | 1.4             | 13.5             | 99.6  | 4.4             | 23.5             | 122.4 |

Secondary Medical Zone ID: 290

|                 | Male            |                  |       |                 |                  |       | Female          |                  |       |                 |                  |       |
|-----------------|-----------------|------------------|-------|-----------------|------------------|-------|-----------------|------------------|-------|-----------------|------------------|-------|
|                 | Suicide         |                  |       | Suicide         |                  |       | Suicide         |                  |       | Suicide         |                  |       |
|                 | Num<br>per year | Rate<br>/100,000 | × 100 | Num<br>per year | Rate<br>/100,000 | × 100 | Num<br>per year | Rate<br>/100,000 | × 100 | Num<br>per year | Rate<br>/100,000 | × 100 |
|                 |                 |                  |       |                 |                  |       |                 |                  |       |                 |                  |       |
| Total (>10 y/o) | 45–54           | Total (>10 y/o)  | 45–54 |                 |                  |       |                 |                  |       |                 |                  |       |
| 1983–1987       | 25.4            | 40.7             | 141.7 | 7.4             | 76.1             | 150.6 | 10.2            | 15.0             | 100.8 | 1.6             | 17.2             | 99.6  |
| 1988–1992       | 23.4            | 32.4             | 159.6 | 5.8             | 55.2             | 160.6 | 9.8             | 12.8             | 103.0 | 1.8             | 16.3             | 111.4 |
| 1993–1997       | 19.2            | 29.5             | 129.2 | 3.8             | 39.6             | 108.1 | 6.8             | 10.0             | 88.2  | 0.8             | 11.4             | 87.9  |
| 1998–2002       | 27.8            | 41.4             | 131.0 | 9.2             | 82.1             | 146.7 | 10.8            | 13.1             | 109.3 | 2.4             | 18.2             | 120.9 |
| 2003–2007       | 26.0            | 42.4             | 127.0 | 7.6             | 84.3             | 150.8 | 8.8             | 12.7             | 100.6 | 1.6             | 15.4             | 112.3 |
| 2008–2012       | 23.6            | 37.7             | 122.6 | 3.8             | 55.1             | 113.4 | 6.6             | 12.5             | 89.1  | 1.6             | 17.6             | 118.2 |
|                 | 15–24           |                  |       | 55–64           |                  |       | 15–24           |                  |       | 55–64           |                  |       |
| 1983–1987       | 1.8             | 18.8             | 134.5 | 4.2             | 50.8             | 119.6 | 0.0             | 5.0              | 73.7  | 3.2             | 26.8             | 136.0 |
| 1988–1992       | 1.6             | 12.9             | 130.4 | 5.4             | 54.1             | 152.3 | 0.0             | 3.9              | 73.3  | 2.0             | 19.4             | 108.5 |
| 1993–1997       | 1.0             | 11.6             | 102.9 | 4.6             | 50.6             | 125.8 | 0.2             | 4.5              | 86.6  | 1.6             | 16.6             | 104.5 |
| 1998–2002       | 2.0             | 19.7             | 124.9 | 5.6             | 69.5             | 109.3 | 0.0             | 5.3              | 75.8  | 2.4             | 21.6             | 114.8 |
| 2003–2007       | 1.0             | 17.3             | 98.9  | 5.4             | 60.6             | 105.0 | 0.0             | 6.5              | 71.7  | 1.8             | 17.4             | 104.1 |
| 2008–2012       | 0.4             | 17.5             | 82.7  | 5.6             | 54.6             | 112.4 | 0.4             | 9.3              | 95.9  | 1.2             | 14.0             | 93.6  |
|                 | 25–34           |                  |       | 65–74           |                  |       | 25–34           |                  |       | 65–74           |                  |       |
| 1983–1987       | 3.0             | 31.3             | 122.4 | 2.0             | 45.6             | 104.1 | 1.2             | 11.9             | 110.6 | 1.6             | 28.5             | 91.3  |
| 1988–1992       | 1.8             | 23.2             | 121.2 | 2.8             | 45.5             | 129.3 | 0.4             | 7.9              | 90.6  | 2.2             | 28.7             | 110.2 |
| 1993–1997       | 2.4             | 27.4             | 140.4 | 1.4             | 27.2             | 85.4  | 0.4             | 7.8              | 93.8  | 1.6             | 19.5             | 100.2 |
| 1998–2002       | 1.2             | 24.3             | 90.1  | 4.4             | 56.2             | 123.6 | 0.8             | 11.8             | 101.5 | 1.2             | 17.6             | 83.7  |
| 2003–2007       | 3.4             | 39.8             | 128.3 | 3.6             | 49.2             | 114.8 | 1.0             | 13.7             | 105.3 | 2.2             | 21.6             | 115.8 |
| 2008–2012       | 2.8             | 36.6             | 112.5 | 3.4             | 44.6             | 112.8 | 0.2             | 11.4             | 79.9  | 1.4             | 17.3             | 97.5  |
|                 | 35–44           |                  |       | >74 y/o         |                  |       | 35–44           |                  |       | >74 y/o         |                  |       |
| 1983–1987       | 4.8             | 43.0             | 135.0 | 2.0             | 83.0             | 106.0 | 1.0             | 11.3             | 95.4  | 1.6             | 47.0             | 81.5  |
| 1988–1992       | 4.2             | 34.8             | 147.0 | 1.8             | 63.0             | 97.7  | 1.0             | 9.8              | 101.5 | 2.4             | 45.7             | 95.5  |
| 1993–1997       | 4.0             | 38.3             | 156.4 | 1.8             | 53.5             | 102.7 | 0.6             | 8.0              | 94.6  | 1.6             | 27.1             | 78.9  |
| 1998–2002       | 2.8             | 40.0             | 113.5 | 2.6             | 60.2             | 114.1 | 1.0             | 11.6             | 112.2 | 3.0             | 35.4             | 114.1 |
| 2003–2007       | 3.0             | 47.2             | 117.7 | 2.0             | 42.3             | 94.0  | 1.0             | 13.6             | 107.5 | 1.2             | 15.3             | 68.0  |
| 2008–2012       | 3.6             | 44.5             | 119.5 | 4.0             | 56.5             | 136.1 | 1.0             | 14.1             | 104.2 | 0.8             | 11.8             | 61.5  |

Secondary Medical Zone ID: 291

|                 | Male            |                  |       |                 |                  |       | Female          |                  |       |                 |                  |       |
|-----------------|-----------------|------------------|-------|-----------------|------------------|-------|-----------------|------------------|-------|-----------------|------------------|-------|
|                 | Suicide         |                  |       | Suicide         |                  |       | Suicide         |                  |       | Suicide         |                  |       |
|                 | Num<br>per year | Rate<br>/100,000 | × 100 | Num<br>per year | Rate<br>/100,000 | × 100 | Num<br>per year | Rate<br>/100,000 | × 100 | Num<br>per year | Rate<br>/100,000 | × 100 |
|                 |                 |                  |       |                 |                  |       |                 |                  |       |                 |                  |       |
| Total (>10 y/o) | 45–54           | Total (>10 y/o)  | 45–54 |                 |                  |       |                 |                  |       |                 |                  |       |
| 1983–1987       | 29.4            | 39.2             | 134.2 | 6.4             | 60.8             | 120.3 | 13.6            | 15.5             | 103.7 | 2.6             | 19.6             | 114.0 |
| 1988–1992       | 26.0            | 31.3             | 145.8 | 6.0             | 51.5             | 150.0 | 15.0            | 14.0             | 117.6 | 2.6             | 17.9             | 122.3 |
| 1993–1997       | 24.6            | 29.8             | 135.1 | 6.8             | 51.1             | 139.7 | 10.0            | 10.8             | 96.7  | 1.4             | 12.5             | 97.1  |
| 1998–2002       | 29.2            | 38.7             | 117.3 | 8.4             | 68.1             | 121.7 | 12.8            | 13.3             | 105.8 | 3.0             | 18.8             | 125.1 |
| 2003–2007       | 33.0            | 44.6             | 135.0 | 5.4             | 57.6             | 103.0 | 11.6            | 13.1             | 105.6 | 1.4             | 13.7             | 100.3 |
| 2008–2012       | 30.6            | 40.9             | 134.7 | 5.6             | 64.3             | 132.4 | 11.8            | 13.6             | 109.7 | 1.6             | 16.7             | 112.1 |
|                 | 15–24           |                  |       | 55–64           |                  |       | 15–24           |                  |       | 55–64           |                  |       |
| 1983–1987       | 1.6             | 16.5             | 118.1 | 4.0             | 44.6             | 104.8 | 0.8             | 7.5              | 110.0 | 2.2             | 19.3             | 97.6  |
| 1988–1992       | 0.2             | 7.7              | 77.3  | 5.4             | 48.1             | 135.5 | 0.4             | 5.0              | 94.7  | 2.4             | 19.1             | 106.7 |
| 1993–1997       | 0.8             | 10.5             | 92.6  | 4.2             | 43.2             | 107.3 | 0.6             | 5.6              | 106.7 | 1.2             | 13.4             | 84.1  |
| 1998–2002       | 1.6             | 16.9             | 107.1 | 4.2             | 53.3             | 83.9  | 0.4             | 6.4              | 90.8  | 1.6             | 17.3             | 91.7  |
| 2003–2007       | 2.2             | 21.8             | 124.9 | 7.8             | 69.7             | 120.7 | 0.6             | 8.7              | 97.0  | 3.0             | 20.2             | 120.5 |
| 2008–2012       | 2.4             | 27.6             | 130.4 | 6.8             | 55.1             | 113.4 | 0.6             | 9.7              | 99.6  | 2.8             | 17.8             | 119.6 |
|                 | 25–34           |                  |       | 65–74           |                  |       | 25–34           |                  |       | 65–74           |                  |       |
| 1983–1987       | 4.2             | 34.1             | 133.5 | 2.8             | 46.2             | 105.6 | 1.8             | 13.2             | 122.5 | 2.6             | 30.8             | 98.4  |
| 1988–1992       | 1.8             | 21.2             | 111.1 | 3.2             | 43.3             | 122.9 | 0.8             | 8.9              | 102.3 | 3.2             | 30.4             | 116.4 |
| 1993–1997       | 1.6             | 21.2             | 108.3 | 3.0             | 36.8             | 115.3 | 0.8             | 8.9              | 107.5 | 2.4             | 21.3             | 109.4 |
| 1998–2002       | 2.0             | 27.4             | 101.5 | 7.0             | 68.2             | 150.0 | 1.4             | 13.4             | 115.8 | 2.6             | 22.6             | 107.6 |
| 2003–2007       | 5.6             | 50.9             | 164.3 | 4.2             | 48.3             | 112.5 | 1.0             | 13.1             | 100.9 | 2.8             | 22.3             | 120.0 |
| 2008–2012       | 3.4             | 39.0             | 119.8 | 6.0             | 57.6             | 145.8 | 0.2             | 11.2             | 78.0  | 1.6             | 17.1             | 95.9  |
|                 | 35–44           |                  |       | >74 y/o         |                  |       | 35–44           |                  |       | >74 y/o         |                  |       |
| 1983–1987       | 6.0             | 45.1             | 141.7 | 4.2             | 110.8            | 141.5 | 2.0             | 13.7             | 116.1 | 1.6             | 38.9             | 67.4  |
| 1988–1992       | 5.6             | 37.9             | 159.8 | 3.8             | 81.1             | 125.7 | 2.2             | 12.6             | 130.7 | 3.4             | 47.1             | 98.5  |
| 1993–1997       | 3.8             | 33.0             | 134.7 | 4.4             | 80.9             | 155.3 | 1.6             | 11.1             | 130.0 | 2.0             | 25.1             | 72.8  |
| 1998–2002       | 3.2             | 39.9             | 113.4 | 2.8             | 53.5             | 101.5 | 1.2             | 11.7             | 113.6 | 2.6             | 25.8             | 83.0  |
| 2003–2007       | 4.6             | 58.3             | 145.5 | 3.2             | 49.2             | 109.3 | 1.2             | 13.8             | 109.4 | 1.6             | 15.1             | 67.4  |
| 2008–2012       | 3.2             | 40.8             | 109.7 | 3.2             | 43.7             | 105.4 | 2.2             | 17.9             | 131.8 | 2.8             | 19.7             | 102.5 |

Secondary Medical Zone ID: 292

|                 | Male            |                  |       |                 |                  |       | Female          |                  |       |                 |                  |       |
|-----------------|-----------------|------------------|-------|-----------------|------------------|-------|-----------------|------------------|-------|-----------------|------------------|-------|
|                 | Suicide         |                  |       | Suicide         |                  |       | Suicide         |                  |       | Suicide         |                  |       |
|                 | Num<br>per year | Rate<br>/100,000 | × 100 | Num<br>per year | Rate<br>/100,000 | × 100 | Num<br>per year | Rate<br>/100,000 | × 100 | Num<br>per year | Rate<br>/100,000 | × 100 |
|                 |                 |                  |       |                 |                  |       |                 |                  |       |                 |                  |       |
| Total (>10 y/o) | 45–54           | Total (>10 y/o)  | 45–54 |                 |                  |       |                 |                  |       |                 |                  |       |
| 1983–1987       | 168.2           | 35.6             | 111.3 | 47.6            | 61.3             | 121.2 | 70.6            | 13.2             | 85.7  | 13.8            | 16.1             | 93.3  |
| 1988–1992       | 140.0           | 28.0             | 116.2 | 30.0            | 37.7             | 109.7 | 65.8            | 11.3             | 85.3  | 11.4            | 13.3             | 90.8  |
| 1993–1997       | 151.6           | 28.7             | 116.5 | 40.6            | 45.9             | 125.5 | 58.8            | 9.6              | 84.2  | 10.2            | 11.1             | 86.2  |
| 1998–2002       | 217.8           | 39.7             | 113.2 | 62.0            | 71.9             | 128.4 | 76.4            | 12.2             | 91.0  | 13.2            | 14.5             | 96.3  |
| 2003–2007       | 216.6           | 40.9             | 113.6 | 46.8            | 64.8             | 115.9 | 73.8            | 12.5             | 92.0  | 11.8            | 15.0             | 109.4 |
| 2008–2012       | 185.2           | 36.0             | 106.9 | 32.0            | 51.6             | 106.2 | 79.2            | 13.9             | 101.0 | 12.2            | 17.6             | 118.0 |
|                 | 15–24           |                  |       | 55–64           |                  |       | 15–24           |                  |       | 55–64           |                  |       |
| 1983–1987       | 11.8            | 15.3             | 109.5 | 31.0            | 51.4             | 121.0 | 4.0             | 5.4              | 78.6  | 12.2            | 17.9             | 90.7  |
| 1988–1992       | 9.4             | 11.2             | 112.7 | 32.0            | 45.9             | 129.4 | 3.0             | 3.9              | 74.7  | 10.8            | 14.4             | 80.5  |
| 1993–1997       | 9.6             | 11.5             | 102.1 | 36.8            | 50.9             | 126.3 | 5.0             | 5.9              | 114.0 | 10.4            | 13.0             | 82.0  |
| 1998–2002       | 9.2             | 13.2             | 83.6  | 48.2            | 64.5             | 101.5 | 5.0             | 7.0              | 100.1 | 17.2            | 20.0             | 106.1 |
| 2003–2007       | 9.2             | 15.4             | 88.0  | 59.8            | 72.4             | 125.3 | 6.0             | 9.7              | 108.3 | 15.2            | 16.6             | 99.0  |
| 2008–2012       | 10.2            | 19.6             | 92.5  | 42.0            | 51.2             | 105.5 | 5.6             | 10.7             | 110.0 | 14.2            | 15.6             | 104.5 |
|                 | 25–34           |                  |       | 65–74           |                  |       | 25–34           |                  |       | 65–74           |                  |       |
| 1983–1987       | 17.6            | 22.9             | 89.5  | 15.6            | 47.5             | 108.5 | 4.4             | 6.2              | 57.2  | 11.8            | 27.7             | 88.6  |
| 1988–1992       | 13.0            | 19.7             | 103.3 | 14.8            | 37.9             | 107.5 | 8.6             | 11.3             | 130.0 | 11.4            | 22.0             | 84.1  |
| 1993–1997       | 13.6            | 20.7             | 106.1 | 18.2            | 36.3             | 113.8 | 5.8             | 8.1              | 97.5  | 12.0            | 18.9             | 97.1  |
| 1998–2002       | 21.6            | 30.0             | 111.3 | 30.0            | 51.0             | 112.2 | 9.8             | 12.7             | 109.4 | 12.6            | 17.7             | 84.3  |
| 2003–2007       | 24.2            | 34.4             | 110.8 | 30.6            | 49.5             | 115.3 | 9.2             | 12.7             | 97.6  | 11.6            | 15.5             | 83.3  |
| 2008–2012       | 19.4            | 32.1             | 98.7  | 30.4            | 46.5             | 117.6 | 12.2            | 18.5             | 128.8 | 12.4            | 16.1             | 90.5  |
|                 | 35–44           |                  |       | >74 y/o         |                  |       | 35–44           |                  |       | >74 y/o         |                  |       |
| 1983–1987       | 32.8            | 35.0             | 110.1 | 11.6            | 75.2             | 96.0  | 11.0            | 11.1             | 93.9  | 13.2            | 52.6             | 91.2  |
| 1988–1992       | 26.2            | 29.3             | 123.8 | 14.2            | 67.2             | 104.1 | 7.8             | 8.6              | 88.7  | 12.6            | 35.6             | 74.5  |
| 1993–1997       | 22.4            | 29.5             | 120.4 | 10.0            | 40.8             | 78.3  | 6.8             | 8.6              | 101.4 | 8.6             | 19.6             | 57.0  |
| 1998–2002       | 25.8            | 39.1             | 111.0 | 20.8            | 64.1             | 121.6 | 8.0             | 11.2             | 108.2 | 10.4            | 18.5             | 59.4  |
| 2003–2007       | 29.8            | 45.9             | 114.5 | 16.0            | 39.3             | 87.3  | 10.4            | 14.4             | 113.8 | 9.4             | 13.3             | 59.4  |
| 2008–2012       | 29.0            | 41.2             | 110.6 | 22.0            | 44.3             | 106.8 | 9.0             | 12.5             | 92.3  | 13.6            | 15.8             | 82.0  |

Secondary Medical Zone ID: 293

|                 | Male            |                  |       |                 |                  |       | Female          |                  |       |                 |                  |       |
|-----------------|-----------------|------------------|-------|-----------------|------------------|-------|-----------------|------------------|-------|-----------------|------------------|-------|
|                 | Suicide         |                  |       | Suicide         |                  |       | Suicide         |                  |       | Suicide         |                  |       |
|                 | Num<br>per year | Rate<br>/100,000 | × 100 | Num<br>per year | Rate<br>/100,000 | × 100 | Num<br>per year | Rate<br>/100,000 | × 100 | Num<br>per year | Rate<br>/100,000 | × 100 |
|                 |                 |                  |       |                 |                  |       |                 |                  |       |                 |                  |       |
| Total (>10 y/o) | 45–54           | Total (>10 y/o)  | 45–54 |                 |                  |       |                 |                  |       |                 |                  |       |
| 1983–1987       | 27.4            | 34.2             | 107.9 | 7.4             | 57.5             | 113.7 | 11.6            | 13.6             | 84.5  | 2.6             | 18.2             | 105.9 |
| 1988–1992       | 25.0            | 27.8             | 119.0 | 6.0             | 43.0             | 125.1 | 13.2            | 12.4             | 96.4  | 2.0             | 14.6             | 99.6  |
| 1993–1997       | 22.2            | 25.5             | 100.9 | 6.2             | 40.8             | 111.5 | 11.8            | 10.7             | 96.8  | 2.0             | 13.1             | 101.2 |
| 1998–2002       | 35.4            | 37.1             | 107.6 | 10.6            | 67.6             | 120.8 | 14.0            | 12.7             | 97.4  | 2.2             | 14.8             | 98.2  |
| 2003–2007       | 40.0            | 42.3             | 120.9 | 10.8            | 78.4             | 140.1 | 11.2            | 11.8             | 87.4  | 2.0             | 14.3             | 104.1 |
| 2008–2012       | 32.4            | 35.8             | 106.6 | 6.0             | 53.1             | 109.3 | 13.4            | 12.8             | 100.6 | 2.0             | 16.0             | 107.5 |
|                 | 15–24           |                  |       | 55–64           |                  |       | 15–24           |                  |       | 55–64           |                  |       |
| 1983–1987       | 3.0             | 20.4             | 146.1 | 3.6             | 38.7             | 91.1  | 0.8             | 6.7              | 98.7  | 1.6             | 16.5             | 83.4  |
| 1988–1992       | 1.0             | 8.9              | 89.7  | 5.4             | 43.1             | 121.4 | 0.2             | 3.9              | 73.6  | 2.6             | 18.9             | 105.7 |
| 1993–1997       | 1.0             | 9.7              | 85.6  | 4.4             | 38.3             | 95.2  | 1.2             | 6.8              | 131.0 | 2.6             | 17.7             | 111.2 |
| 1998–2002       | 1.4             | 13.9             | 88.3  | 5.8             | 51.9             | 81.6  | 0.8             | 7.1              | 101.0 | 2.2             | 17.5             | 92.7  |
| 2003–2007       | 3.6             | 24.6             | 141.0 | 8.2             | 58.6             | 101.5 | 0.4             | 7.1              | 79.2  | 3.4             | 19.2             | 114.6 |
| 2008–2012       | 2.4             | 24.0             | 113.1 | 4.8             | 39.1             | 80.5  | 1.0             | 10.7             | 110.0 | 3.2             | 17.3             | 116.1 |
|                 | 25–34           |                  |       | 65–74           |                  |       | 25–34           |                  |       | 65–74           |                  |       |
| 1983–1987       | 4.4             | 31.4             | 122.7 | 1.8             | 36.2             | 82.7  | 0.8             | 8.6              | 79.8  | 2.0             | 26.5             | 84.8  |
| 1988–1992       | 3.6             | 27.8             | 145.4 | 3.2             | 41.4             | 117.5 | 0.8             | 8.1              | 93.0  | 1.8             | 21.0             | 80.6  |
| 1993–1997       | 3.0             | 24.4             | 125.1 | 2.0             | 26.5             | 83.0  | 0.6             | 7.3              | 87.9  | 2.2             | 19.5             | 99.9  |
| 1998–2002       | 4.6             | 33.7             | 125.0 | 5.0             | 48.4             | 106.4 | 2.2             | 14.3             | 123.3 | 2.4             | 20.0             | 95.4  |
| 2003–2007       | 4.8             | 37.4             | 120.7 | 4.8             | 44.6             | 104.0 | 1.0             | 11.4             | 87.4  | 2.2             | 17.8             | 95.7  |
| 2008–2012       | 4.4             | 36.9             | 113.4 | 5.4             | 44.8             | 113.4 | 1.0             | 12.8             | 89.2  | 3.2             | 20.8             | 116.6 |
|                 | 35–44           |                  |       | >74 y/o         |                  |       | 35–44           |                  |       | >74 y/o         |                  |       |
| 1983–1987       | 4.6             | 31.8             | 100.1 | 2.4             | 72.6             | 92.7  | 2.2             | 13.0             | 110.0 | 1.4             | 33.2             | 57.5  |
| 1988–1992       | 3.8             | 25.3             | 106.6 | 2.0             | 52.8             | 81.8  | 2.0             | 11.1             | 115.1 | 3.8             | 48.3             | 101.0 |
| 1993–1997       | 2.8             | 23.0             | 93.7  | 2.2             | 47.3             | 90.7  | 1.0             | 8.1              | 95.1  | 2.2             | 25.3             | 73.5  |
| 1998–2002       | 3.8             | 35.0             | 99.2  | 4.0             | 62.3             | 118.1 | 1.2             | 10.3             | 99.8  | 2.8             | 25.5             | 82.2  |
| 2003–2007       | 4.6             | 42.9             | 107.0 | 3.2             | 43.9             | 97.5  | 1.2             | 12.0             | 94.8  | 1.0             | 10.6             | 47.1  |
| 2008–2012       | 4.4             | 37.5             | 100.9 | 5.0             | 51.5             | 124.1 | 0.8             | 11.2             | 82.3  | 2.2             | 15.4             | 79.8  |

Secondary Medical Zone ID: 294

|                 | Male            |                  |       |                 |                  |       | Female          |                  |       |                 |                  |       |
|-----------------|-----------------|------------------|-------|-----------------|------------------|-------|-----------------|------------------|-------|-----------------|------------------|-------|
|                 | Suicide         |                  |       | Suicide         |                  |       | Suicide         |                  |       | Suicide         |                  |       |
|                 | Num<br>per year | Rate<br>/100,000 | × 100 | Num<br>per year | Rate<br>/100,000 | × 100 | Num<br>per year | Rate<br>/100,000 | × 100 | Num<br>per year | Rate<br>/100,000 | × 100 |
|                 |                 |                  |       |                 |                  |       |                 |                  |       |                 |                  |       |
| Total (>10 y/o) | 45–54           | Total (>10 y/o)  | 45–54 |                 |                  |       |                 |                  |       |                 |                  |       |
| 1983–1987       | 49.2            | 35.0             | 109.4 | 13.2            | 60.5             | 119.6 | 23.8            | 14.4             | 91.5  | 5.2             | 20.3             | 117.6 |
| 1988–1992       | 36.2            | 24.5             | 99.9  | 9.0             | 41.1             | 119.7 | 16.8            | 10.5             | 72.5  | 2.0             | 11.4             | 77.8  |
| 1993–1997       | 35.8            | 23.8             | 92.7  | 9.8             | 40.1             | 109.5 | 19.2            | 10.1             | 89.3  | 3.8             | 14.1             | 109.5 |
| 1998–2002       | 62.4            | 38.7             | 107.8 | 19.8            | 72.5             | 129.6 | 19.6            | 10.9             | 80.0  | 3.0             | 12.9             | 85.4  |
| 2003–2007       | 66.0            | 40.8             | 111.7 | 18.2            | 73.4             | 131.2 | 19.0            | 10.9             | 81.3  | 3.4             | 13.6             | 99.5  |
| 2008–2012       | 52.8            | 33.4             | 97.5  | 10.2            | 48.6             | 100.1 | 19.6            | 12.1             | 85.2  | 3.6             | 15.5             | 103.7 |
|                 | 15–24           |                  |       | 55–64           |                  |       | 15–24           |                  |       | 55–64           |                  |       |
| 1983–1987       | 3.4             | 14.7             | 105.1 | 8.0             | 43.9             | 103.2 | 1.6             | 6.6              | 96.4  | 4.2             | 19.6             | 99.5  |
| 1988–1992       | 2.2             | 9.4              | 95.1  | 8.2             | 39.3             | 110.8 | 1.0             | 4.5              | 85.4  | 4.0             | 17.4             | 97.7  |
| 1993–1997       | 3.6             | 12.9             | 114.0 | 7.4             | 37.9             | 94.2  | 1.8             | 6.2              | 118.1 | 2.0             | 11.2             | 70.5  |
| 1998–2002       | 5.0             | 18.9             | 119.7 | 12.6            | 63.5             | 100.0 | 0.8             | 5.1              | 72.7  | 4.6             | 19.6             | 104.3 |
| 2003–2007       | 4.0             | 18.1             | 103.5 | 11.4            | 51.9             | 89.9  | 1.4             | 7.6              | 84.1  | 3.6             | 15.5             | 92.6  |
| 2008–2012       | 3.2             | 18.8             | 88.7  | 12.2            | 48.4             | 99.6  | 2.6             | 12.3             | 126.5 | 3.2             | 13.3             | 89.2  |
|                 | 25–34           |                  |       | 65–74           |                  |       | 25–34           |                  |       | 65–74           |                  |       |
| 1983–1987       | 7.0             | 28.9             | 112.9 | 4.4             | 42.6             | 97.3  | 3.6             | 13.1             | 121.3 | 3.4             | 25.1             | 80.2  |
| 1988–1992       | 2.8             | 14.9             | 78.2  | 3.4             | 29.7             | 84.4  | 1.2             | 6.7              | 77.7  | 3.8             | 22.9             | 88.0  |
| 1993–1997       | 3.4             | 17.5             | 89.5  | 2.0             | 17.8             | 55.9  | 1.4             | 7.2              | 86.1  | 2.6             | 14.7             | 75.2  |
| 1998–2002       | 4.2             | 22.2             | 82.2  | 7.4             | 43.7             | 96.0  | 1.8             | 9.6              | 82.7  | 4.0             | 19.2             | 91.3  |
| 2003–2007       | 8.6             | 37.3             | 120.2 | 8.6             | 47.8             | 111.5 | 2.0             | 10.7             | 82.4  | 3.2             | 16.2             | 86.8  |
| 2008–2012       | 5.4             | 29.4             | 90.3  | 7.0             | 40.4             | 102.3 | 1.6             | 10.8             | 75.6  | 3.0             | 15.7             | 88.4  |
|                 | 35–44           |                  |       | >74 y/o         |                  |       | 35–44           |                  |       | >74 y/o         |                  |       |
| 1983–1987       | 8.8             | 35.7             | 112.1 | 4.4             | 71.3             | 91.0  | 2.6             | 10.9             | 92.2  | 3.2             | 34.7             | 60.2  |
| 1988–1992       | 6.8             | 25.6             | 108.0 | 3.6             | 51.3             | 79.6  | 2.8             | 10.1             | 104.6 | 2.0             | 18.9             | 39.4  |
| 1993–1997       | 5.4             | 22.8             | 92.9  | 4.2             | 49.5             | 95.0  | 2.6             | 9.6              | 112.8 | 5.0             | 30.9             | 89.7  |
| 1998–2002       | 10.6            | 45.5             | 129.2 | 2.8             | 33.1             | 62.7  | 1.6             | 8.4              | 80.9  | 3.8             | 20.7             | 66.5  |
| 2003–2007       | 10.8            | 49.5             | 123.6 | 4.4             | 36.0             | 80.0  | 1.6             | 9.6              | 76.1  | 3.8             | 16.7             | 74.3  |
| 2008–2012       | 8.2             | 38.0             | 102.0 | 6.4             | 41.0             | 98.9  | 2.6             | 12.5             | 92.0  | 3.0             | 12.4             | 64.4  |

Secondary Medical Zone ID: 295

|           | Male            |          |       |          |          |       | Female          |          |       |          |          |       |
|-----------|-----------------|----------|-------|----------|----------|-------|-----------------|----------|-------|----------|----------|-------|
|           | Suicide         |          |       | Suicide  |          |       | Suicide         |          |       | Suicide  |          |       |
|           | Num             | Rate     | × 100 | Num      | Rate     | × 100 | Num             | Rate     | × 100 | Num      | Rate     | × 100 |
|           | per year        | /100,000 |       | per year | /100,000 |       | per year        | /100,000 |       | per year | /100,000 |       |
|           | Total (>10 y/o) |          |       | 45–54    |          |       | Total (>10 y/o) |          |       | 45–54    |          |       |
| 1983–1987 | 16.0            | 35.6     | 118.6 | 5.2      | 68.9     | 136.3 | 3.8             | 13.0     | 70.0  | 0.4      | 13.6     | 78.7  |
| 1988–1992 | 12.6            | 26.2     | 113.0 | 2.6      | 36.2     | 105.5 | 4.6             | 11.2     | 76.7  | 0.2      | 11.4     | 77.7  |
| 1993–1997 | 12.0            | 25.1     | 99.1  | 1.8      | 29.7     | 81.2  | 6.4             | 10.6     | 97.7  | 1.0      | 12.6     | 97.4  |
| 1998–2002 | 18.2            | 35.1     | 97.3  | 5.4      | 59.0     | 105.4 | 7.2             | 12.3     | 93.1  | 1.6      | 15.8     | 105.2 |
| 2003–2007 | 19.8            | 37.0     | 100.0 | 5.0      | 60.5     | 108.1 | 8.0             | 12.1     | 99.1  | 1.0      | 13.1     | 95.9  |
| 2008–2012 | 19.6            | 34.5     | 103.5 | 2.6      | 43.1     | 88.7  | 5.6             | 12.2     | 83.3  | 0.6      | 12.7     | 85.3  |
|           | 15–24           |          |       | 55–64    |          |       | 15–24           |          |       | 55–64    |          |       |
| 1983–1987 | 0.8             | 13.4     | 95.8  | 2.0      | 41.7     | 98.0  | 0.0             | 5.1      | 74.5  | 1.0      | 19.0     | 96.2  |
| 1988–1992 | 1.2             | 11.6     | 117.0 | 1.6      | 31.5     | 88.7  | 0.0             | 3.8      | 72.2  | 1.2      | 18.1     | 101.2 |
| 1993–1997 | 0.2             | 8.7      | 77.3  | 3.4      | 46.8     | 116.2 | 0.6             | 5.7      | 109.1 | 1.2      | 16.4     | 103.1 |
| 1998–2002 | 0.6             | 13.1     | 83.1  | 4.4      | 63.6     | 100.1 | 0.4             | 6.5      | 91.9  | 1.2      | 18.0     | 95.4  |
| 2003–2007 | 1.6             | 19.4     | 111.1 | 2.8      | 43.5     | 75.4  | 0.0             | 6.1      | 67.8  | 2.6      | 20.8     | 124.4 |
| 2008–2012 | 0.4             | 16.8     | 79.1  | 5.2      | 53.4     | 109.9 | 0.8             | 10.8     | 110.9 | 0.4      | 11.6     | 78.1  |
|           | 25–34           |          |       | 65–74    |          |       | 25–34           |          |       | 65–74    |          |       |
| 1983–1987 | 2.6             | 31.2     | 122.2 | 0.6      | 35.7     | 81.5  | 0.2             | 8.1      | 75.6  | 0.6      | 24.6     | 78.9  |
| 1988–1992 | 1.0             | 18.2     | 95.0  | 1.4      | 38.0     | 107.8 | 0.4             | 8.0      | 92.3  | 0.8      | 22.0     | 84.2  |
| 1993–1997 | 1.6             | 21.9     | 112.0 | 1.2      | 30.0     | 94.2  | 0.4             | 7.7      | 92.7  | 0.2      | 12.5     | 64.1  |
| 1998–2002 | 2.0             | 27.1     | 100.3 | 3.2      | 52.6     | 115.6 | 0.2             | 9.1      | 78.7  | 1.4      | 21.5     | 102.6 |
| 2003–2007 | 3.4             | 36.5     | 117.7 | 2.6      | 44.5     | 103.7 | 0.2             | 9.6      | 73.8  | 1.4      | 19.4     | 104.1 |
| 2008–2012 | 2.8             | 35.0     | 107.6 | 3.6      | 47.5     | 120.2 | 0.8             | 13.2     | 91.9  | 0.4      | 13.9     | 78.2  |
|           | 35–44           |          |       | >74 y/o  |          |       | 35–44           |          |       | >74 y/o  |          |       |
| 1983–1987 | 3.6             | 38.8     | 121.8 | 1.0      | 70.0     | 89.3  | 0.4             | 9.7      | 82.4  | 1.2      | 49.8     | 86.3  |
| 1988–1992 | 3.4             | 32.4     | 136.8 | 1.2      | 61.5     | 95.4  | 0.6             | 8.9      | 92.5  | 1.4      | 39.9     | 83.4  |
| 1993–1997 | 2.2             | 26.7     | 109.0 | 1.4      | 55.3     | 106.3 | 1.0             | 9.8      | 114.9 | 1.8      | 36.7     | 106.8 |
| 1998–2002 | 2.0             | 32.1     | 91.1  | 0.6      | 37.5     | 71.2  | 1.0             | 11.4     | 109.9 | 1.4      | 26.6     | 85.6  |
| 2003–2007 | 2.6             | 38.6     | 96.4  | 1.8      | 45.8     | 101.7 | 1.0             | 12.9     | 102.4 | 1.8      | 24.0     | 107.1 |
| 2008–2012 | 3.6             | 40.5     | 108.9 | 1.2      | 33.4     | 80.4  | 1.6             | 15.2     | 112.4 | 1.0      | 15.1     | 78.5  |



Secondary Medical Zone ID: 296

|                 | Male            |                  |       |                 |                  |       | Female          |                  |       |                 |                  |       |
|-----------------|-----------------|------------------|-------|-----------------|------------------|-------|-----------------|------------------|-------|-----------------|------------------|-------|
|                 | Suicide         |                  |       | Suicide         |                  |       | Suicide         |                  |       | Suicide         |                  |       |
|                 | Num<br>per year | Rate<br>/100,000 | × 100 | Num<br>per year | Rate<br>/100,000 | × 100 | Num<br>per year | Rate<br>/100,000 | × 100 | Num<br>per year | Rate<br>/100,000 | × 100 |
|                 |                 |                  |       |                 |                  |       |                 |                  |       |                 |                  |       |
| Total (>10 y/o) | 45–54           | Total (>10 y/o)  | 45–54 |                 |                  |       |                 |                  |       |                 |                  |       |
| 1983–1987       | 23.6            | 36.3             | 119.5 | 6.2             | 62.7             | 124.0 | 12.6            | 15.8             | 106.4 | 1.2             | 15.0             | 87.3  |
| 1988–1992       | 17.8            | 26.9             | 113.8 | 4.0             | 41.8             | 121.6 | 7.8             | 11.4             | 80.5  | 1.4             | 14.7             | 100.6 |
| 1993–1997       | 18.4            | 26.6             | 112.4 | 4.2             | 40.1             | 109.6 | 8.6             | 10.5             | 95.6  | 1.6             | 14.0             | 108.4 |
| 1998–2002       | 31.6            | 42.6             | 131.0 | 10.4            | 82.0             | 146.6 | 9.0             | 12.1             | 90.3  | 1.8             | 15.7             | 104.2 |
| 2003–2007       | 34.0            | 46.7             | 141.8 | 10.4            | 92.3             | 165.1 | 7.2             | 11.3             | 83.5  | 1.0             | 12.4             | 90.2  |
| 2008–2012       | 31.6            | 41.7             | 139.0 | 4.8             | 54.6             | 112.4 | 10.4            | 13.5             | 105.6 | 1.6             | 16.1             | 107.9 |
|                 | 15–24           |                  |       | 55–64           |                  |       | 15–24           |                  |       | 55–64           |                  |       |
| 1983–1987       | 1.4             | 15.5             | 110.9 | 4.0             | 46.3             | 109.1 | 1.2             | 8.8              | 129.3 | 1.8             | 19.0             | 96.4  |
| 1988–1992       | 1.0             | 10.6             | 106.6 | 4.2             | 42.6             | 119.9 | 0.4             | 5.1              | 96.0  | 1.0             | 14.4             | 80.4  |
| 1993–1997       | 0.8             | 10.7             | 94.6  | 4.6             | 48.2             | 119.8 | 0.4             | 5.0              | 96.7  | 1.8             | 17.0             | 106.9 |
| 1998–2002       | 2.2             | 19.8             | 125.3 | 5.2             | 65.3             | 102.7 | 0.2             | 5.8              | 82.9  | 2.4             | 21.4             | 113.7 |
| 2003–2007       | 1.8             | 20.1             | 115.4 | 6.6             | 67.3             | 116.6 | 0.4             | 8.0              | 88.9  | 1.8             | 17.3             | 103.3 |
| 2008–2012       | 1.2             | 20.9             | 98.5  | 7.2             | 59.3             | 122.0 | 0.6             | 9.9              | 101.8 | 1.6             | 14.9             | 100.1 |
|                 | 25–34           |                  |       | 65–74           |                  |       | 25–34           |                  |       | 65–74           |                  |       |
| 1983–1987       | 4.4             | 35.3             | 138.3 | 1.6             | 38.9             | 89.0  | 1.4             | 11.7             | 108.8 | 1.6             | 26.5             | 84.6  |
| 1988–1992       | 2.8             | 26.3             | 137.4 | 1.4             | 30.2             | 85.7  | 0.8             | 8.6              | 99.8  | 0.6             | 14.9             | 57.1  |
| 1993–1997       | 2.0             | 22.5             | 115.4 | 1.8             | 28.9             | 90.5  | 0.8             | 8.7              | 104.8 | 1.4             | 17.2             | 88.0  |
| 1998–2002       | 2.8             | 31.1             | 115.0 | 4.8             | 55.3             | 121.6 | 0.8             | 11.1             | 96.1  | 1.2             | 16.7             | 79.4  |
| 2003–2007       | 3.6             | 38.0             | 122.7 | 3.0             | 42.0             | 97.9  | 0.2             | 9.7              | 74.8  | 0.6             | 13.3             | 71.2  |
| 2008–2012       | 4.4             | 43.7             | 134.2 | 4.2             | 49.7             | 125.9 | 1.6             | 16.7             | 116.3 | 1.8             | 18.9             | 106.3 |
|                 | 35–44           |                  |       | >74 y/o         |                  |       | 35–44           |                  |       | >74 y/o         |                  |       |
| 1983–1987       | 3.6             | 34.3             | 107.8 | 2.0             | 74.1             | 94.6  | 2.4             | 16.0             | 135.2 | 2.8             | 59.7             | 103.5 |
| 1988–1992       | 3.4             | 27.7             | 116.7 | 1.0             | 43.1             | 66.9  | 0.8             | 8.9              | 91.8  | 2.8             | 45.8             | 95.7  |
| 1993–1997       | 2.4             | 24.0             | 98.0  | 2.4             | 59.3             | 113.8 | 0.8             | 8.2              | 96.7  | 1.8             | 27.0             | 78.4  |
| 1998–2002       | 4.2             | 43.6             | 123.8 | 2.0             | 47.8             | 90.7  | 0.8             | 9.8              | 95.2  | 1.8             | 23.0             | 74.2  |
| 2003–2007       | 5.2             | 58.8             | 146.8 | 3.4             | 53.7             | 119.3 | 0.8             | 11.9             | 93.9  | 2.4             | 22.4             | 99.7  |
| 2008–2012       | 6.0             | 54.7             | 147.0 | 3.8             | 49.7             | 119.8 | 1.0             | 13.4             | 98.9  | 2.2             | 18.5             | 96.0  |

Secondary Medical Zone ID: 297

|                 | Male            |                  |       |                 |                  |       | Female          |                  |       |                 |                  |       |
|-----------------|-----------------|------------------|-------|-----------------|------------------|-------|-----------------|------------------|-------|-----------------|------------------|-------|
|                 | Suicide         |                  |       | Suicide         |                  |       | Suicide         |                  |       | Suicide         |                  |       |
|                 | Num<br>per year | Rate<br>/100,000 | × 100 | Num<br>per year | Rate<br>/100,000 | × 100 | Num<br>per year | Rate<br>/100,000 | × 100 | Num<br>per year | Rate<br>/100,000 | × 100 |
|                 |                 |                  |       |                 |                  |       |                 |                  |       |                 |                  |       |
| Total (>10 y/o) | 45–54           | Total (>10 y/o)  | 45–54 |                 |                  |       |                 |                  |       |                 |                  |       |
| 1983–1987       | 13.2            | 35.2             | 114.8 | 4.0             | 64.0             | 126.6 | 4.8             | 13.9             | 83.2  | 0.8             | 16.3             | 94.5  |
| 1988–1992       | 11.2            | 26.8             | 119.7 | 2.6             | 42.1             | 122.7 | 4.2             | 11.5             | 80.6  | 0.4             | 13.0             | 89.1  |
| 1993–1997       | 13.6            | 28.8             | 132.4 | 3.8             | 48.4             | 132.3 | 5.8             | 11.2             | 105.5 | 1.0             | 13.9             | 107.8 |
| 1998–2002       | 17.6            | 40.2             | 122.4 | 5.0             | 67.6             | 120.8 | 5.2             | 12.3             | 92.2  | 1.0             | 15.3             | 101.5 |
| 2003–2007       | 19.2            | 43.2             | 133.0 | 6.2             | 85.6             | 153.1 | 4.8             | 12.1             | 92.6  | 1.4             | 16.1             | 117.8 |
| 2008–2012       | 14.4            | 35.7             | 110.6 | 3.2             | 55.7             | 114.5 | 4.8             | 12.2             | 94.8  | 0.6             | 14.3             | 95.5  |
|                 | 15–24           |                  |       | 55–64           |                  |       | 15–24           |                  |       | 55–64           |                  |       |
| 1983–1987       | 0.2             | 11.2             | 80.4  | 3.0             | 51.8             | 121.9 | 0.2             | 6.4              | 94.0  | 1.0             | 18.9             | 95.9  |
| 1988–1992       | 0.4             | 9.8              | 99.1  | 3.8             | 53.1             | 149.7 | 0.2             | 5.1              | 97.2  | 0.4             | 14.5             | 81.2  |
| 1993–1997       | 0.6             | 11.7             | 103.1 | 1.8             | 38.8             | 96.5  | 0.2             | 5.1              | 97.5  | 1.6             | 19.8             | 124.8 |
| 1998–2002       | 1.0             | 17.4             | 110.3 | 3.2             | 65.6             | 103.3 | 0.2             | 6.6              | 94.6  | 0.8             | 17.9             | 95.0  |
| 2003–2007       | 0.6             | 17.1             | 98.1  | 3.6             | 62.6             | 108.4 | 0.2             | 8.3              | 91.7  | 1.0             | 16.9             | 101.0 |
| 2008–2012       | 0.0             | 17.0             | 80.1  | 3.4             | 51.1             | 105.2 | 0.0             | 7.9              | 81.2  | 1.0             | 15.1             | 101.5 |
|                 | 25–34           |                  |       | 65–74           |                  |       | 25–34           |                  |       | 65–74           |                  |       |
| 1983–1987       | 1.8             | 27.5             | 107.8 | 1.6             | 49.4             | 112.8 | 0.4             | 9.6              | 88.8  | 1.0             | 28.5             | 91.2  |
| 1988–1992       | 0.4             | 15.1             | 79.1  | 0.8             | 30.8             | 87.5  | 0.4             | 8.5              | 97.8  | 1.2             | 25.8             | 99.1  |
| 1993–1997       | 1.2             | 22.1             | 113.3 | 2.4             | 44.0             | 138.1 | 1.0             | 10.9             | 130.9 | 0.8             | 17.5             | 90.0  |
| 1998–2002       | 1.8             | 31.1             | 115.3 | 2.0             | 45.6             | 100.3 | 0.6             | 12.0             | 103.5 | 1.2             | 21.3             | 101.4 |
| 2003–2007       | 3.2             | 44.3             | 142.9 | 2.2             | 46.4             | 108.1 | 0.2             | 11.3             | 87.2  | 0.6             | 16.3             | 87.8  |
| 2008–2012       | 2.2             | 37.5             | 115.1 | 1.8             | 41.0             | 103.9 | 0.4             | 13.4             | 93.5  | 1.2             | 19.3             | 108.4 |
|                 | 35–44           |                  |       | >74 y/o         |                  |       | 35–44           |                  |       | >74 y/o         |                  |       |
| 1983–1987       | 1.8             | 31.7             | 99.6  | 0.8             | 65.3             | 83.4  | 0.6             | 11.4             | 96.6  | 0.8             | 39.6             | 68.6  |
| 1988–1992       | 2.0             | 27.0             | 113.9 | 1.2             | 63.1             | 97.8  | 0.6             | 9.6              | 99.6  | 1.0             | 34.6             | 72.3  |
| 1993–1997       | 3.0             | 36.1             | 147.4 | 0.8             | 44.5             | 85.4  | 0.6             | 8.9              | 104.7 | 0.6             | 21.2             | 61.7  |
| 1998–2002       | 3.6             | 51.2             | 145.2 | 1.0             | 45.7             | 86.7  | 0.6             | 10.6             | 103.0 | 0.8             | 21.0             | 67.5  |
| 2003–2007       | 2.2             | 45.1             | 112.6 | 1.2             | 40.7             | 90.4  | 0.2             | 11.0             | 87.1  | 1.2             | 20.2             | 90.1  |
| 2008–2012       | 1.4             | 36.0             | 96.7  | 2.4             | 49.9             | 120.3 | 0.2             | 12.0             | 88.4  | 1.4             | 19.2             | 99.8  |

Secondary Medical Zone ID: 298

|                 | Male            |                  |       |                 |                  |       | Female          |                  |       |                 |                  |       |
|-----------------|-----------------|------------------|-------|-----------------|------------------|-------|-----------------|------------------|-------|-----------------|------------------|-------|
|                 | Suicide         |                  |       | Suicide         |                  |       | Suicide         |                  |       | Suicide         |                  |       |
|                 | Num<br>per year | Rate<br>/100,000 | × 100 | Num<br>per year | Rate<br>/100,000 | × 100 | Num<br>per year | Rate<br>/100,000 | × 100 | Num<br>per year | Rate<br>/100,000 | × 100 |
|                 |                 |                  |       |                 |                  |       |                 |                  |       |                 |                  |       |
| Total (>10 y/o) | 45–54           | Total (>10 y/o)  | 45–54 |                 |                  |       |                 |                  |       |                 |                  |       |
| 1983–1987       | 25.8            | 34.7             | 106.6 | 5.6             | 50.9             | 100.7 | 11.0            | 13.2             | 79.8  | 1.6             | 15.2             | 88.0  |
| 1988–1992       | 19.6            | 25.3             | 102.3 | 4.2             | 38.7             | 112.6 | 14.4            | 13.1             | 103.7 | 2.8             | 18.3             | 124.9 |
| 1993–1997       | 23.2            | 27.4             | 114.3 | 3.8             | 34.8             | 95.2  | 12.2            | 10.8             | 102.6 | 2.8             | 17.0             | 131.5 |
| 1998–2002       | 37.4            | 42.6             | 127.0 | 10.0            | 70.7             | 126.3 | 10.8            | 12.0             | 86.3  | 1.6             | 14.1             | 93.5  |
| 2003–2007       | 35.8            | 41.8             | 123.9 | 9.4             | 72.9             | 130.4 | 9.6             | 11.8             | 85.4  | 1.2             | 12.2             | 89.2  |
| 2008–2012       | 26.6            | 35.9             | 103.1 | 7.0             | 60.7             | 125.0 | 8.2             | 11.1             | 82.1  | 1.2             | 13.5             | 90.5  |
|                 | 15–24           |                  |       | 55–64           |                  |       | 15–24           |                  |       | 55–64           |                  |       |
| 1983–1987       | 0.6             | 9.9              | 71.0  | 3.4             | 35.9             | 84.4  | 0.6             | 6.4              | 93.1  | 2.2             | 18.2             | 92.1  |
| 1988–1992       | 0.6             | 8.8              | 88.6  | 3.6             | 33.2             | 93.4  | 0.2             | 4.2              | 78.9  | 3.0             | 20.3             | 113.7 |
| 1993–1997       | 1.8             | 13.7             | 121.1 | 6.6             | 54.0             | 134.1 | 0.4             | 4.8              | 91.8  | 2.2             | 16.9             | 106.4 |
| 1998–2002       | 0.6             | 12.3             | 77.8  | 7.2             | 70.7             | 111.3 | 0.6             | 6.8              | 96.2  | 3.2             | 22.7             | 120.4 |
| 2003–2007       | 1.2             | 16.5             | 94.8  | 7.6             | 65.8             | 114.0 | 0.4             | 7.4              | 82.1  | 2.4             | 18.2             | 108.4 |
| 2008–2012       | 1.4             | 20.6             | 97.2  | 5.8             | 46.9             | 96.5  | 0.4             | 8.2              | 84.3  | 1.4             | 13.4             | 90.1  |
|                 | 25–34           |                  |       | 65–74           |                  |       | 25–34           |                  |       | 65–74           |                  |       |
| 1983–1987       | 5.2             | 35.7             | 139.5 | 2.0             | 36.5             | 83.3  | 0.6             | 8.0              | 74.6  | 2.6             | 29.2             | 93.5  |
| 1988–1992       | 2.8             | 23.6             | 123.4 | 1.8             | 28.6             | 81.3  | 1.8             | 11.5             | 133.1 | 2.4             | 23.7             | 90.7  |
| 1993–1997       | 3.2             | 26.7             | 136.9 | 2.2             | 27.1             | 84.9  | 0.8             | 8.2              | 98.9  | 3.0             | 22.9             | 117.6 |
| 1998–2002       | 4.2             | 36.0             | 133.4 | 4.0             | 43.0             | 94.6  | 1.0             | 11.3             | 97.6  | 1.6             | 16.4             | 78.2  |
| 2003–2007       | 2.4             | 29.6             | 95.6  | 6.8             | 62.2             | 145.0 | 1.2             | 13.2             | 101.3 | 1.4             | 15.4             | 82.7  |
| 2008–2012       | 2.0             | 29.4             | 90.2  | 3.2             | 39.0             | 98.7  | 0.2             | 10.5             | 73.0  | 1.2             | 15.3             | 85.9  |
|                 | 35–44           |                  |       | >74 y/o         |                  |       | 35–44           |                  |       | >74 y/o         |                  |       |
| 1983–1987       | 6.4             | 46.3             | 145.4 | 2.4             | 68.1             | 87.0  | 1.2             | 11.2             | 94.6  | 2.2             | 39.1             | 67.7  |
| 1988–1992       | 3.6             | 26.0             | 109.9 | 3.0             | 65.0             | 100.7 | 0.6             | 7.8              | 81.1  | 3.6             | 43.0             | 89.8  |
| 1993–1997       | 3.4             | 26.5             | 108.2 | 2.2             | 45.5             | 87.4  | 0.4             | 6.3              | 74.6  | 2.6             | 27.2             | 78.9  |
| 1998–2002       | 7.0             | 54.7             | 155.2 | 4.2             | 62.5             | 118.6 | 1.2             | 10.6             | 102.9 | 1.6             | 16.6             | 53.5  |
| 2003–2007       | 5.2             | 50.7             | 126.5 | 3.0             | 40.6             | 90.2  | 1.0             | 11.9             | 93.8  | 2.0             | 15.5             | 68.9  |
| 2008–2012       | 4.0             | 41.1             | 110.5 | 3.2             | 37.6             | 90.6  | 0.4             | 10.8             | 79.4  | 3.4             | 20.2             | 104.9 |

Secondary Medical Zone ID: 299

|                 | Male            |                  |       |                 |                  |       | Female          |                  |       |                 |                  |       |
|-----------------|-----------------|------------------|-------|-----------------|------------------|-------|-----------------|------------------|-------|-----------------|------------------|-------|
|                 | Suicide         |                  |       | Suicide         |                  |       | Suicide         |                  |       | Suicide         |                  |       |
|                 | Num<br>per year | Rate<br>/100,000 | × 100 | Num<br>per year | Rate<br>/100,000 | × 100 | Num<br>per year | Rate<br>/100,000 | × 100 | Num<br>per year | Rate<br>/100,000 | × 100 |
|                 |                 |                  |       |                 |                  |       |                 |                  |       |                 |                  |       |
| Total (>10 y/o) | 45–54           | Total (>10 y/o)  | 45–54 |                 |                  |       |                 |                  |       |                 |                  |       |
| 1983–1987       | 81.0            | 35.0             | 110.5 | 21.0            | 58.3             | 115.4 | 30.4            | 12.2             | 75.7  | 4.0             | 11.8             | 68.8  |
| 1988–1992       | 66.0            | 26.8             | 111.7 | 14.4            | 40.0             | 116.3 | 30.2            | 10.7             | 78.6  | 6.0             | 15.0             | 102.3 |
| 1993–1997       | 66.0            | 26.1             | 104.8 | 17.0            | 41.3             | 112.8 | 25.2            | 8.7              | 74.0  | 5.4             | 12.6             | 97.3  |
| 1998–2002       | 92.2            | 36.0             | 99.8  | 28.6            | 64.6             | 115.4 | 31.8            | 10.9             | 78.6  | 5.4             | 12.8             | 84.7  |
| 2003–2007       | 110.6           | 42.6             | 118.7 | 29.0            | 72.9             | 130.4 | 32.8            | 11.5             | 84.2  | 6.4             | 14.8             | 108.3 |
| 2008–2012       | 88.6            | 34.9             | 104.5 | 19.0            | 55.9             | 114.9 | 29.8            | 11.0             | 80.0  | 5.4             | 14.7             | 98.8  |
|                 | 15–24           |                  |       | 55–64           |                  |       | 15–24           |                  |       | 55–64           |                  |       |
| 1983–1987       | 5.0             | 13.2             | 94.3  | 14.6            | 49.4             | 116.3 | 3.0             | 7.0              | 102.5 | 6.0             | 17.7             | 89.8  |
| 1988–1992       | 3.4             | 9.1              | 91.7  | 12.6            | 38.4             | 108.2 | 2.4             | 5.4              | 103.1 | 4.4             | 13.2             | 74.1  |
| 1993–1997       | 4.8             | 12.1             | 107.0 | 13.8            | 42.1             | 104.5 | 1.6             | 4.3              | 82.0  | 5.0             | 13.7             | 86.4  |
| 1998–2002       | 4.8             | 14.6             | 92.2  | 19.0            | 58.8             | 92.6  | 2.4             | 6.7              | 95.7  | 7.8             | 19.9             | 106.0 |
| 2003–2007       | 4.4             | 15.6             | 89.5  | 24.6            | 64.8             | 112.2 | 3.0             | 9.2              | 102.7 | 4.4             | 12.5             | 74.7  |
| 2008–2012       | 3.2             | 15.1             | 71.1  | 27.8            | 63.4             | 130.6 | 1.6             | 7.1              | 73.2  | 6.8             | 15.0             | 100.8 |
|                 | 25–34           |                  |       | 65–74           |                  |       | 25–34           |                  |       | 65–74           |                  |       |
| 1983–1987       | 13.6            | 31.1             | 121.5 | 5.6             | 37.0             | 84.6  | 3.8             | 8.9              | 83.0  | 5.2             | 25.1             | 80.2  |
| 1988–1992       | 6.8             | 19.2             | 100.5 | 6.4             | 33.1             | 93.8  | 2.4             | 6.8              | 78.8  | 5.6             | 21.1             | 81.0  |
| 1993–1997       | 6.4             | 19.6             | 100.4 | 6.6             | 27.9             | 87.3  | 1.8             | 6.0              | 72.4  | 3.0             | 11.1             | 56.7  |
| 1998–2002       | 6.6             | 22.0             | 81.4  | 11.4            | 42.3             | 93.0  | 3.6             | 10.4             | 89.6  | 2.8             | 10.7             | 50.7  |
| 2003–2007       | 13.6            | 40.8             | 131.6 | 10.8            | 39.1             | 91.2  | 4.8             | 13.6             | 104.3 | 4.4             | 13.8             | 74.2  |
| 2008–2012       | 8.4             | 31.5             | 96.7  | 8.2             | 31.4             | 79.5  | 3.2             | 12.1             | 84.4  | 4.2             | 13.7             | 76.9  |
|                 | 35–44           |                  |       | >74 y/o         |                  |       | 35–44           |                  |       | >74 y/o         |                  |       |
| 1983–1987       | 16.4            | 37.7             | 118.5 | 4.2             | 57.2             | 73.1  | 4.8             | 10.9             | 92.4  | 3.6             | 31.0             | 53.6  |
| 1988–1992       | 15.8            | 33.1             | 139.7 | 6.4             | 60.6             | 93.9  | 3.4             | 7.9              | 82.1  | 6.0             | 33.0             | 68.9  |
| 1993–1997       | 12.0            | 28.7             | 117.1 | 5.2             | 42.3             | 81.3  | 2.8             | 7.0              | 82.9  | 5.4             | 23.5             | 68.2  |
| 1998–2002       | 15.6            | 43.3             | 122.9 | 6.2             | 40.5             | 76.8  | 4.0             | 10.4             | 100.5 | 5.8             | 19.9             | 64.2  |
| 2003–2007       | 16.4            | 49.8             | 124.3 | 11.6            | 54.0             | 119.9 | 3.6             | 10.9             | 86.0  | 6.0             | 16.3             | 72.4  |
| 2008–2012       | 12.0            | 37.3             | 100.2 | 10.0            | 40.7             | 98.0  | 3.0             | 10.2             | 75.2  | 5.6             | 13.3             | 69.0  |

Secondary Medical Zone ID: 300

|           | Male            |                  |       |                 |                  |       | Female          |                  |       |                 |                  |       |
|-----------|-----------------|------------------|-------|-----------------|------------------|-------|-----------------|------------------|-------|-----------------|------------------|-------|
|           | Suicide         |                  |       | Suicide         |                  |       | Suicide         |                  |       | Suicide         |                  |       |
|           | Num<br>per year | Rate<br>/100,000 | × 100 | Num<br>per year | Rate<br>/100,000 | × 100 | Num<br>per year | Rate<br>/100,000 | × 100 | Num<br>per year | Rate<br>/100,000 | × 100 |
|           |                 |                  |       |                 |                  |       |                 |                  |       |                 |                  |       |
|           | Total (>10 y/o) |                  |       | 45–54           |                  |       | Total (>10 y/o) |                  |       | 45–54           |                  |       |
| 1983–1987 | 58.4            | 38.3             | 121.8 | 11.4            | 50.5             | 99.8  | 30.2            | 15.8             | 104.7 | 6.6             | 22.3             | 129.6 |
| 1988–1992 | 48.0            | 29.0             | 124.3 | 10.8            | 46.2             | 134.5 | 24.2            | 12.2             | 92.2  | 3.4             | 14.0             | 95.6  |
| 1993–1997 | 48.0            | 28.1             | 117.9 | 14.8            | 53.3             | 145.7 | 19.8            | 10.0             | 87.2  | 4.8             | 15.8             | 122.4 |
| 1998–2002 | 68.6            | 40.9             | 116.5 | 18.0            | 65.0             | 116.2 | 24.2            | 12.2             | 91.6  | 5.2             | 17.3             | 115.0 |
| 2003–2007 | 81.4            | 47.8             | 137.8 | 19.8            | 79.7             | 142.5 | 22.4            | 12.2             | 91.6  | 3.0             | 12.9             | 94.2  |
| 2008–2012 | 56.8            | 36.5             | 108.0 | 10.6            | 52.8             | 108.6 | 21.2            | 12.4             | 91.7  | 1.8             | 11.5             | 76.9  |
|           | 15–24           |                  |       | 55–64           |                  |       | 15–24           |                  |       | 55–64           |                  |       |
| 1983–1987 | 3.4             | 16.3             | 116.7 | 10.6            | 49.4             | 116.3 | 1.2             | 6.1              | 89.8  | 5.0             | 19.5             | 98.8  |
| 1988–1992 | 2.4             | 10.6             | 107.0 | 11.8            | 49.1             | 138.4 | 1.8             | 6.7              | 127.6 | 5.2             | 19.1             | 107.0 |
| 1993–1997 | 2.8             | 12.0             | 106.5 | 8.8             | 41.1             | 102.2 | 0.8             | 4.4              | 84.2  | 2.6             | 12.1             | 76.1  |
| 1998–2002 | 3.0             | 15.3             | 96.7  | 15.8            | 74.5             | 117.2 | 1.0             | 6.1              | 86.3  | 4.2             | 17.8             | 94.7  |
| 2003–2007 | 3.2             | 17.5             | 100.5 | 20.4            | 81.6             | 141.3 | 1.8             | 9.8              | 108.9 | 5.4             | 19.0             | 113.5 |
| 2008–2012 | 5.4             | 28.9             | 136.5 | 14.8            | 54.7             | 112.5 | 1.0             | 8.3              | 85.7  | 3.6             | 14.0             | 93.7  |
|           | 25–34           |                  |       | 65–74           |                  |       | 25–34           |                  |       | 65–74           |                  |       |
| 1983–1987 | 7.8             | 31.1             | 121.5 | 5.6             | 45.7             | 104.3 | 3.6             | 12.8             | 118.9 | 4.2             | 25.9             | 82.8  |
| 1988–1992 | 5.2             | 23.9             | 125.3 | 6.0             | 40.3             | 114.4 | 2.2             | 9.4              | 108.8 | 2.8             | 16.1             | 61.6  |
| 1993–1997 | 1.6             | 12.4             | 63.5  | 7.8             | 42.2             | 132.1 | 1.8             | 8.5              | 102.6 | 2.6             | 13.0             | 66.8  |
| 1998–2002 | 4.6             | 24.8             | 91.9  | 10.4            | 52.5             | 115.4 | 2.4             | 11.6             | 99.7  | 3.8             | 17.0             | 81.0  |
| 2003–2007 | 7.6             | 36.8             | 118.6 | 10.2            | 51.9             | 120.9 | 1.4             | 9.8              | 75.3  | 4.0             | 17.4             | 93.3  |
| 2008–2012 | 5.8             | 33.6             | 103.0 | 6.8             | 38.8             | 98.2  | 2.6             | 14.7             | 102.5 | 3.0             | 15.0             | 84.5  |
|           | 35–44           |                  |       | >74 y/o         |                  |       | 35–44           |                  |       | >74 y/o         |                  |       |
| 1983–1987 | 14.0            | 49.3             | 154.9 | 5.6             | 84.6             | 108.1 | 3.4             | 12.0             | 101.9 | 6.2             | 59.1             | 102.5 |
| 1988–1992 | 7.4             | 26.2             | 110.4 | 4.2             | 54.9             | 85.2  | 2.8             | 9.8              | 101.2 | 6.0             | 42.3             | 88.4  |
| 1993–1997 | 8.2             | 31.4             | 127.9 | 4.0             | 44.9             | 86.3  | 2.4             | 9.1              | 107.1 | 4.8             | 27.7             | 80.5  |
| 1998–2002 | 12.2            | 53.4             | 151.6 | 4.6             | 42.9             | 81.4  | 2.4             | 10.8             | 104.1 | 5.2             | 24.1             | 77.6  |
| 2003–2007 | 13.4            | 64.3             | 160.6 | 6.6             | 45.5             | 101.0 | 3.0             | 13.8             | 109.0 | 3.6             | 14.4             | 64.1  |
| 2008–2012 | 6.2             | 34.2             | 92.0  | 7.2             | 42.5             | 102.5 | 3.8             | 16.2             | 119.4 | 5.4             | 17.6             | 91.7  |

Secondary Medical Zone ID: 301

|                 | Male            |                  |       |                 |                  |       | Female          |                  |       |                 |                  |       |
|-----------------|-----------------|------------------|-------|-----------------|------------------|-------|-----------------|------------------|-------|-----------------|------------------|-------|
|                 | Suicide         |                  |       | Suicide         |                  |       | Suicide         |                  |       | Suicide         |                  |       |
|                 | Num<br>per year | Rate<br>/100,000 | × 100 | Num<br>per year | Rate<br>/100,000 | × 100 | Num<br>per year | Rate<br>/100,000 | × 100 | Num<br>per year | Rate<br>/100,000 | × 100 |
|                 |                 |                  |       |                 |                  |       |                 |                  |       |                 |                  |       |
| Total (>10 y/o) | 45–54           | Total (>10 y/o)  | 45–54 |                 |                  |       |                 |                  |       |                 |                  |       |
| 1983–1987       | 37.8            | 38.2             | 125.5 | 11.0            | 70.5             | 139.3 | 14.2            | 13.7             | 85.9  | 2.8             | 17.6             | 102.3 |
| 1988–1992       | 24.2            | 24.2             | 97.5  | 5.0             | 34.1             | 99.2  | 15.6            | 12.2             | 94.0  | 1.8             | 13.0             | 89.1  |
| 1993–1997       | 28.6            | 25.7             | 102.6 | 7.2             | 39.7             | 108.4 | 13.4            | 10.3             | 89.4  | 3.6             | 16.1             | 124.8 |
| 1998–2002       | 48.8            | 39.1             | 113.1 | 13.2            | 64.1             | 114.5 | 16.6            | 12.0             | 91.0  | 2.6             | 13.9             | 92.1  |
| 2003–2007       | 52.8            | 41.5             | 117.3 | 12.8            | 65.7             | 117.5 | 15.8            | 11.6             | 89.3  | 2.6             | 13.5             | 98.2  |
| 2008–2012       | 44.8            | 35.3             | 106.8 | 8.0             | 48.1             | 98.9  | 14.6            | 11.8             | 85.2  | 1.8             | 12.3             | 82.4  |
|                 | 15–24           |                  |       | 55–64           |                  |       | 15–24           |                  |       | 55–64           |                  |       |
| 1983–1987       | 3.2             | 19.5             | 139.6 | 4.6             | 40.7             | 95.9  | 1.2             | 7.2              | 106.0 | 1.8             | 16.0             | 80.9  |
| 1988–1992       | 2.0             | 11.3             | 113.7 | 4.6             | 34.0             | 95.8  | 0.4             | 4.0              | 76.1  | 3.8             | 21.5             | 120.2 |
| 1993–1997       | 1.6             | 10.7             | 94.2  | 5.4             | 38.5             | 95.6  | 0.6             | 4.4              | 85.2  | 2.0             | 14.0             | 87.9  |
| 1998–2002       | 2.0             | 14.3             | 90.7  | 11.2            | 72.1             | 113.6 | 1.0             | 6.7              | 95.0  | 3.4             | 19.6             | 104.3 |
| 2003–2007       | 2.0             | 15.7             | 89.9  | 12.8            | 69.8             | 120.9 | 0.4             | 5.8              | 64.9  | 3.0             | 16.3             | 97.5  |
| 2008–2012       | 2.0             | 18.5             | 87.0  | 10.0            | 49.8             | 102.6 | 0.6             | 7.2              | 73.9  | 2.6             | 13.7             | 92.0  |
|                 | 25–34           |                  |       | 65–74           |                  |       | 25–34           |                  |       | 65–74           |                  |       |
| 1983–1987       | 6.0             | 33.0             | 129.3 | 3.6             | 50.2             | 114.7 | 1.4             | 9.3              | 86.3  | 3.4             | 33.7             | 107.9 |
| 1988–1992       | 3.0             | 19.6             | 102.8 | 2.0             | 28.7             | 81.4  | 1.8             | 9.8              | 112.9 | 2.6             | 23.5             | 90.1  |
| 1993–1997       | 2.6             | 18.2             | 93.1  | 3.2             | 31.1             | 97.4  | 1.0             | 7.3              | 87.9  | 2.6             | 19.1             | 98.2  |
| 1998–2002       | 4.4             | 27.2             | 100.8 | 6.4             | 49.7             | 109.3 | 1.6             | 10.5             | 90.8  | 2.8             | 19.5             | 92.7  |
| 2003–2007       | 5.8             | 33.9             | 109.5 | 5.4             | 41.9             | 97.6  | 1.6             | 11.2             | 86.1  | 3.2             | 19.7             | 105.7 |
| 2008–2012       | 5.0             | 33.6             | 103.0 | 7.0             | 47.5             | 120.1 | 2.6             | 15.5             | 108.5 | 2.2             | 15.7             | 88.5  |
|                 | 35–44           |                  |       | >74 y/o         |                  |       | 35–44           |                  |       | >74 y/o         |                  |       |
| 1983–1987       | 5.6             | 33.0             | 103.7 | 3.4             | 84.9             | 108.4 | 1.0             | 8.8              | 74.1  | 2.6             | 44.1             | 76.4  |
| 1988–1992       | 4.6             | 23.9             | 100.7 | 3.0             | 61.7             | 95.6  | 2.2             | 10.3             | 107.0 | 3.0             | 35.2             | 73.6  |
| 1993–1997       | 6.6             | 32.2             | 131.5 | 1.6             | 35.2             | 67.5  | 1.8             | 8.9              | 105.1 | 1.8             | 19.1             | 55.6  |
| 1998–2002       | 7.8             | 42.5             | 120.6 | 3.6             | 51.6             | 97.8  | 1.8             | 10.1             | 98.1  | 3.4             | 25.5             | 82.0  |
| 2003–2007       | 9.4             | 53.2             | 132.7 | 4.6             | 48.5             | 107.7 | 2.0             | 12.0             | 95.2  | 3.0             | 18.4             | 81.9  |
| 2008–2012       | 7.4             | 41.4             | 111.3 | 5.4             | 45.5             | 109.8 | 2.2             | 13.0             | 95.7  | 2.4             | 13.7             | 71.4  |

Secondary Medical Zone ID: 302

|                 | Male            |                  |       |                 |                  |       | Female          |                  |       |                 |                  |       |
|-----------------|-----------------|------------------|-------|-----------------|------------------|-------|-----------------|------------------|-------|-----------------|------------------|-------|
|                 | Suicide         |                  |       | Suicide         |                  |       | Suicide         |                  |       | Suicide         |                  |       |
|                 | Num<br>per year | Rate<br>/100,000 | × 100 | Num<br>per year | Rate<br>/100,000 | × 100 | Num<br>per year | Rate<br>/100,000 | × 100 | Num<br>per year | Rate<br>/100,000 | × 100 |
|                 |                 |                  |       |                 |                  |       |                 |                  |       |                 |                  |       |
| Total (>10 y/o) | 45–54           | Total (>10 y/o)  | 45–54 |                 |                  |       |                 |                  |       |                 |                  |       |
| 1983–1987       | 20.8            | 30.6             | 91.1  | 4.2             | 42.0             | 83.1  | 14.0            | 14.9             | 97.4  | 2.4             | 18.1             | 105.0 |
| 1988–1992       | 24.0            | 28.3             | 126.0 | 3.6             | 35.8             | 104.1 | 14.2            | 13.2             | 105.5 | 2.4             | 17.1             | 116.7 |
| 1993–1997       | 18.6            | 25.4             | 100.0 | 4.2             | 38.5             | 105.3 | 14.0            | 11.8             | 119.3 | 1.8             | 14.1             | 109.2 |
| 1998–2002       | 30.6            | 38.5             | 112.7 | 6.2             | 54.4             | 97.2  | 13.6            | 13.1             | 106.2 | 1.8             | 15.2             | 100.7 |
| 2003–2007       | 32.2            | 41.2             | 120.1 | 8.8             | 73.1             | 130.6 | 11.8            | 12.3             | 102.5 | 1.4             | 13.2             | 96.3  |
| 2008–2012       | 25.8            | 35.1             | 108.2 | 5.0             | 50.3             | 103.5 | 8.6             | 11.7             | 88.8  | 0.4             | 10.8             | 72.2  |
|                 | 15–24           |                  |       | 55–64           |                  |       | 15–24           |                  |       | 55–64           |                  |       |
| 1983–1987       | 0.8             | 11.1             | 79.9  | 4.4             | 42.9             | 100.8 | 1.0             | 7.7              | 113.3 | 2.2             | 18.6             | 94.5  |
| 1988–1992       | 1.2             | 10.9             | 110.3 | 5.8             | 46.3             | 130.4 | 0.2             | 4.3              | 81.8  | 2.4             | 18.2             | 101.8 |
| 1993–1997       | 0.6             | 10.1             | 89.0  | 3.4             | 36.0             | 89.5  | 0.0             | 3.8              | 72.5  | 2.6             | 18.6             | 117.0 |
| 1998–2002       | 1.2             | 15.6             | 99.0  | 7.2             | 72.2             | 113.7 | 0.4             | 6.6              | 93.5  | 3.0             | 22.1             | 117.6 |
| 2003–2007       | 1.0             | 16.7             | 95.6  | 5.6             | 56.5             | 97.9  | 0.0             | 6.2              | 69.1  | 2.6             | 19.2             | 114.8 |
| 2008–2012       | 1.0             | 20.5             | 96.7  | 6.0             | 50.8             | 104.6 | 0.4             | 9.1              | 93.6  | 1.4             | 13.9             | 93.0  |
|                 | 25–34           |                  |       | 65–74           |                  |       | 25–34           |                  |       | 65–74           |                  |       |
| 1983–1987       | 3.8             | 29.6             | 115.9 | 3.2             | 49.4             | 112.9 | 0.4             | 7.4              | 68.4  | 3.2             | 34.4             | 110.2 |
| 1988–1992       | 2.2             | 20.9             | 109.2 | 4.0             | 47.3             | 134.3 | 0.6             | 7.6              | 87.1  | 2.8             | 27.1             | 103.9 |
| 1993–1997       | 1.2             | 17.4             | 89.2  | 3.0             | 33.3             | 104.5 | 1.0             | 9.2              | 110.5 | 2.6             | 21.4             | 109.9 |
| 1998–2002       | 2.2             | 28.0             | 103.7 | 4.0             | 43.0             | 94.6  | 0.8             | 11.1             | 95.4  | 3.4             | 25.0             | 118.8 |
| 2003–2007       | 2.4             | 32.3             | 104.1 | 5.0             | 49.6             | 115.6 | 0.4             | 10.7             | 82.4  | 1.8             | 17.1             | 91.8  |
| 2008–2012       | 1.4             | 29.0             | 89.1  | 3.8             | 42.6             | 107.8 | 0.8             | 13.8             | 96.3  | 1.6             | 16.8             | 94.7  |
|                 | 35–44           |                  |       | >74 y/o         |                  |       | 35–44           |                  |       | >74 y/o         |                  |       |
| 1983–1987       | 3.4             | 31.5             | 99.0  | 1.0             | 43.9             | 56.0  | 1.4             | 12.0             | 101.3 | 3.4             | 54.2             | 93.9  |
| 1988–1992       | 4.6             | 32.0             | 135.2 | 2.2             | 54.8             | 85.0  | 1.2             | 9.7              | 100.7 | 4.6             | 53.9             | 112.6 |
| 1993–1997       | 4.2             | 32.2             | 131.2 | 2.0             | 44.1             | 84.6  | 0.8             | 7.9              | 92.5  | 5.2             | 50.3             | 146.1 |
| 1998–2002       | 5.4             | 47.0             | 133.3 | 4.4             | 65.4             | 124.1 | 1.4             | 11.6             | 112.3 | 2.8             | 25.8             | 83.0  |
| 2003–2007       | 5.2             | 53.8             | 134.3 | 4.2             | 51.1             | 113.5 | 1.4             | 13.6             | 108.0 | 4.2             | 28.3             | 126.3 |
| 2008–2012       | 3.6             | 41.5             | 111.6 | 5.0             | 50.2             | 121.0 | 0.4             | 11.2             | 82.3  | 3.6             | 21.6             | 112.2 |

Secondary Medical Zone ID: 303

|                 | Male            |                  |       |                 |                  |       | Female          |                  |       |                 |                  |       |
|-----------------|-----------------|------------------|-------|-----------------|------------------|-------|-----------------|------------------|-------|-----------------|------------------|-------|
|                 | Suicide         |                  |       | Suicide         |                  |       | Suicide         |                  |       | Suicide         |                  |       |
|                 | Num<br>per year | Rate<br>/100,000 | × 100 | Num<br>per year | Rate<br>/100,000 | × 100 | Num<br>per year | Rate<br>/100,000 | × 100 | Num<br>per year | Rate<br>/100,000 | × 100 |
|                 |                 |                  |       |                 |                  |       |                 |                  |       |                 |                  |       |
| Total (>10 y/o) | 45–54           | Total (>10 y/o)  | 45–54 |                 |                  |       |                 |                  |       |                 |                  |       |
| 1983–1987       | 11.0            | 36.1             | 129.7 | 1.8             | 50.0             | 98.8  | 5.4             | 15.7             | 107.2 | 0.8             | 17.8             | 103.1 |
| 1988–1992       | 7.6             | 26.9             | 120.0 | 1.8             | 42.1             | 122.4 | 4.6             | 12.9             | 105.1 | 0.6             | 15.0             | 102.7 |
| 1993–1997       | 6.8             | 26.3             | 110.9 | 1.8             | 42.1             | 115.0 | 2.2             | 10.0             | 82.1  | 0.4             | 12.8             | 99.2  |
| 1998–2002       | 10.2            | 38.3             | 115.9 | 1.4             | 50.3             | 89.8  | 2.8             | 12.1             | 88.1  | 0.8             | 16.2             | 107.9 |
| 2003–2007       | 10.4            | 40.1             | 122.7 | 2.6             | 65.3             | 116.8 | 3.8             | 13.0             | 104.0 | 0.8             | 15.2             | 111.1 |
| 2008–2012       | 10.2            | 38.1             | 125.3 | 2.2             | 56.7             | 116.8 | 1.8             | 12.5             | 87.9  | 0.0             | 12.6             | 84.6  |
|                 | 15–24           |                  |       | 55–64           |                  |       | 15–24           |                  |       | 55–64           |                  |       |
| 1983–1987       | 0.4             | 14.1             | 101.3 | 2.8             | 57.2             | 134.5 | 0.0             | 6.0              | 88.0  | 1.8             | 25.9             | 131.4 |
| 1988–1992       | 0.2             | 9.8              | 98.7  | 1.2             | 34.8             | 98.0  | 0.0             | 4.7              | 89.3  | 0.6             | 16.9             | 94.9  |
| 1993–1997       | 0.2             | 11.1             | 98.3  | 1.6             | 42.9             | 106.7 | 0.0             | 4.7              | 90.6  | 0.6             | 15.8             | 99.2  |
| 1998–2002       | 0.4             | 16.3             | 103.4 | 3.0             | 77.9             | 122.6 | 0.0             | 6.4              | 91.3  | 0.2             | 16.7             | 88.6  |
| 2003–2007       | 0.8             | 20.6             | 118.2 | 3.2             | 75.3             | 130.5 | 0.2             | 9.3              | 103.2 | 0.8             | 17.9             | 106.9 |
| 2008–2012       | 0.8             | 25.1             | 118.2 | 1.6             | 48.2             | 99.2  | 0.2             | 10.3             | 105.8 | 0.6             | 15.3             | 102.4 |
|                 | 25–34           |                  |       | 65–74           |                  |       | 25–34           |                  |       | 65–74           |                  |       |
| 1983–1987       | 1.4             | 29.4             | 114.8 | 1.4             | 51.6             | 117.8 | 1.0             | 13.9             | 129.2 | 0.6             | 27.0             | 86.4  |
| 1988–1992       | 1.8             | 30.1             | 157.5 | 0.6             | 32.4             | 91.9  | 0.4             | 9.2              | 106.4 | 1.0             | 27.6             | 105.6 |
| 1993–1997       | 1.0             | 23.7             | 121.4 | 0.6             | 28.3             | 88.6  | 0.0             | 7.3              | 88.2  | 0.4             | 16.3             | 83.5  |
| 1998–2002       | 1.2             | 31.5             | 116.7 | 0.8             | 39.2             | 86.2  | 0.0             | 10.4             | 89.9  | 0.8             | 20.7             | 98.4  |
| 2003–2007       | 0.4             | 29.5             | 95.1  | 1.6             | 46.9             | 109.4 | 0.2             | 12.8             | 98.3  | 0.4             | 16.7             | 89.9  |
| 2008–2012       | 0.6             | 33.5             | 102.9 | 1.2             | 41.4             | 104.9 | 0.4             | 15.3             | 106.6 | 0.2             | 15.9             | 89.1  |
|                 | 35–44           |                  |       | >74 y/o         |                  |       | 35–44           |                  |       | >74 y/o         |                  |       |
| 1983–1987       | 1.6             | 37.0             | 116.2 | 1.6             | 96.3             | 123.0 | 0.2             | 10.9             | 91.9  | 1.0             | 51.9             | 89.9  |
| 1988–1992       | 1.2             | 26.4             | 111.5 | 0.8             | 60.9             | 94.5  | 0.2             | 9.1              | 93.7  | 1.8             | 59.5             | 124.4 |
| 1993–1997       | 1.2             | 27.6             | 112.7 | 0.4             | 41.4             | 79.5  | 0.4             | 8.9              | 105.2 | 0.4             | 22.2             | 64.5  |
| 1998–2002       | 2.4             | 49.1             | 139.3 | 0.8             | 48.9             | 92.9  | 0.4             | 10.7             | 103.6 | 0.6             | 22.9             | 73.6  |
| 2003–2007       | 1.6             | 48.5             | 121.0 | 0.2             | 31.0             | 68.8  | 0.4             | 13.0             | 102.8 | 0.8             | 19.9             | 88.8  |
| 2008–2012       | 2.0             | 46.1             | 123.8 | 1.6             | 47.4             | 114.2 | 0.2             | 13.2             | 97.3  | 0.2             | 12.7             | 66.3  |



Secondary Medical Zone ID: 304

|                 | Male            |                  |       |                 |                  |       | Female          |                  |       |                 |                  |       |
|-----------------|-----------------|------------------|-------|-----------------|------------------|-------|-----------------|------------------|-------|-----------------|------------------|-------|
|                 | Suicide         |                  |       | Suicide         |                  |       | Suicide         |                  |       | Suicide         |                  |       |
|                 | Num<br>per year | Rate<br>/100,000 | × 100 | Num<br>per year | Rate<br>/100,000 | × 100 | Num<br>per year | Rate<br>/100,000 | × 100 | Num<br>per year | Rate<br>/100,000 | × 100 |
|                 |                 |                  |       |                 |                  |       |                 |                  |       |                 |                  |       |
| Total (>10 y/o) | 45–54           | Total (>10 y/o)  | 45–54 |                 |                  |       |                 |                  |       |                 |                  |       |
| 1983–1987       | 6.0             | 32.9             | 105.9 | 1.6             | 53.0             | 104.8 | 1.2             | 13.6             | 74.3  | 0.0             | 14.3             | 83.2  |
| 1988–1992       | 3.2             | 23.9             | 90.5  | 1.4             | 41.4             | 120.5 | 0.8             | 11.2             | 70.8  | 0.0             | 13.0             | 88.8  |
| 1993–1997       | 3.2             | 24.3             | 91.8  | 0.6             | 35.0             | 95.7  | 1.2             | 10.1             | 82.6  | 0.0             | 11.6             | 89.6  |
| 1998–2002       | 6.2             | 37.7             | 108.6 | 0.8             | 50.3             | 89.8  | 1.0             | 11.8             | 81.0  | 0.0             | 13.5             | 90.0  |
| 2003–2007       | 4.8             | 36.3             | 98.6  | 0.8             | 49.0             | 87.6  | 1.4             | 12.3             | 90.9  | 0.2             | 13.3             | 97.0  |
| 2008–2012       | 4.2             | 34.0             | 100.4 | 0.8             | 47.8             | 98.4  | 2.2             | 13.1             | 103.0 | 0.0             | 13.4             | 90.0  |
|                 | 15–24           |                  |       | 55–64           |                  |       | 15–24           |                  |       | 55–64           |                  |       |
| 1983–1987       | 0.4             | 14.5             | 103.9 | 1.4             | 46.4             | 109.2 | 0.0             | 6.2              | 91.0  | 0.2             | 17.0             | 86.0  |
| 1988–1992       | 0.2             | 10.0             | 101.2 | 1.0             | 36.7             | 103.3 | 0.0             | 4.9              | 92.5  | 0.6             | 18.3             | 102.7 |
| 1993–1997       | 0.2             | 11.5             | 101.4 | 0.8             | 38.9             | 96.7  | 0.0             | 4.9              | 93.7  | 0.2             | 14.4             | 90.5  |
| 1998–2002       | 0.6             | 18.3             | 115.6 | 1.4             | 65.8             | 103.6 | 0.2             | 7.5              | 107.2 | 0.2             | 17.6             | 93.6  |
| 2003–2007       | 0.0             | 16.5             | 94.3  | 1.2             | 59.1             | 102.4 | 0.2             | 9.7              | 107.9 | 0.2             | 16.1             | 95.9  |
| 2008–2012       | 0.0             | 20.1             | 95.0  | 1.2             | 49.9             | 102.7 | 0.2             | 10.6             | 109.5 | 0.8             | 17.0             | 114.2 |
|                 | 25–34           |                  |       | 65–74           |                  |       | 25–34           |                  |       | 65–74           |                  |       |
| 1983–1987       | 1.0             | 27.8             | 108.9 | 0.8             | 47.5             | 108.4 | 0.4             | 11.5             | 106.8 | 0.2             | 25.7             | 82.3  |
| 1988–1992       | 0.2             | 17.1             | 89.5  | 0.2             | 29.7             | 84.3  | 0.2             | 8.8              | 101.3 | 0.0             | 18.0             | 69.1  |
| 1993–1997       | 0.4             | 20.2             | 103.4 | 0.4             | 28.9             | 90.8  | 0.0             | 7.7              | 92.2  | 0.4             | 18.3             | 93.9  |
| 1998–2002       | 0.8             | 30.4             | 112.6 | 0.4             | 39.5             | 86.8  | 0.2             | 11.8             | 101.6 | 0.4             | 19.7             | 93.6  |
| 2003–2007       | 0.4             | 31.6             | 101.9 | 1.2             | 47.7             | 111.2 | 0.0             | 12.2             | 94.1  | 0.2             | 16.8             | 90.2  |
| 2008–2012       | 0.0             | 30.5             | 93.8  | 1.2             | 45.1             | 114.2 | 0.2             | 14.8             | 103.3 | 0.0             | 15.7             | 88.0  |
|                 | 35–44           |                  |       | >74 y/o         |                  |       | 35–44           |                  |       | >74 y/o         |                  |       |
| 1983–1987       | 0.4             | 28.2             | 88.5  | 0.4             | 72.6             | 92.7  | 0.0             | 10.5             | 88.9  | 0.4             | 46.0             | 79.8  |
| 1988–1992       | 0.2             | 20.1             | 84.8  | 0.0             | 47.4             | 73.5  | 0.0             | 8.7              | 90.4  | 0.0             | 27.1             | 56.6  |
| 1993–1997       | 0.4             | 22.5             | 91.9  | 0.4             | 49.2             | 94.5  | 0.2             | 8.6              | 100.6 | 0.4             | 28.9             | 84.1  |
| 1998–2002       | 2.0             | 50.2             | 142.4 | 0.2             | 43.0             | 81.6  | 0.0             | 9.3              | 89.6  | 0.0             | 17.9             | 57.5  |
| 2003–2007       | 0.8             | 42.5             | 106.1 | 0.4             | 40.1             | 89.1  | 0.4             | 13.6             | 107.8 | 0.2             | 16.2             | 72.2  |
| 2008–2012       | 0.4             | 36.7             | 98.7  | 0.6             | 39.8             | 95.9  | 0.2             | 13.7             | 100.9 | 0.8             | 21.2             | 110.0 |

Secondary Medical Zone ID: 305

|                 | Male            |                  |       |                 |                  |       | Female          |                  |       |                 |                  |       |
|-----------------|-----------------|------------------|-------|-----------------|------------------|-------|-----------------|------------------|-------|-----------------|------------------|-------|
|                 | Suicide         |                  |       | Suicide         |                  |       | Suicide         |                  |       | Suicide         |                  |       |
|                 | Num<br>per year | Rate<br>/100,000 | × 100 | Num<br>per year | Rate<br>/100,000 | × 100 | Num<br>per year | Rate<br>/100,000 | × 100 | Num<br>per year | Rate<br>/100,000 | × 100 |
|                 |                 |                  |       |                 |                  |       |                 |                  |       |                 |                  |       |
| Total (>10 y/o) | 45–54           | Total (>10 y/o)  | 45–54 |                 |                  |       |                 |                  |       |                 |                  |       |
| 1983–1987       | 7.0             | 34.3             | 118.6 | 1.4             | 51.8             | 102.4 | 3.8             | 15.6             | 108.3 | 0.2             | 15.6             | 90.8  |
| 1988–1992       | 6.8             | 27.5             | 135.3 | 0.6             | 32.8             | 95.4  | 2.0             | 12.1             | 87.3  | 0.4             | 14.9             | 101.6 |
| 1993–1997       | 4.8             | 25.5             | 108.8 | 1.2             | 39.7             | 108.4 | 2.0             | 10.6             | 94.0  | 0.4             | 13.3             | 103.2 |
| 1998–2002       | 6.0             | 36.1             | 102.9 | 0.2             | 43.0             | 76.8  | 2.0             | 12.2             | 92.0  | 0.4             | 15.2             | 101.2 |
| 2003–2007       | 8.6             | 40.3             | 133.7 | 2.6             | 77.7             | 138.9 | 2.2             | 12.6             | 98.5  | 0.6             | 15.2             | 111.0 |
| 2008–2012       | 6.4             | 36.5             | 113.6 | 1.8             | 58.5             | 120.4 | 2.2             | 12.8             | 100.7 | 0.4             | 15.7             | 105.0 |
|                 | 15–24           |                  |       | 55–64           |                  |       | 15–24           |                  |       | 55–64           |                  |       |
| 1983–1987       | 0.4             | 15.2             | 108.7 | 2.0             | 53.6             | 126.2 | 0.2             | 7.1              | 104.4 | 1.2             | 24.1             | 122.1 |
| 1988–1992       | 0.2             | 10.0             | 101.1 | 2.2             | 49.6             | 139.8 | 0.0             | 4.9              | 92.4  | 0.2             | 15.9             | 89.0  |
| 1993–1997       | 0.6             | 13.2             | 116.9 | 0.8             | 38.7             | 96.2  | 0.6             | 7.4              | 142.3 | 0.2             | 14.4             | 90.8  |
| 1998–2002       | 0.4             | 16.7             | 105.6 | 1.8             | 70.7             | 111.2 | 0.2             | 7.5              | 106.0 | 0.8             | 20.7             | 110.1 |
| 2003–2007       | 0.2             | 17.3             | 99.4  | 1.8             | 64.9             | 112.4 | 0.0             | 8.3              | 92.5  | 0.2             | 15.9             | 94.8  |
| 2008–2012       | 0.4             | 22.6             | 106.3 | 1.0             | 47.4             | 97.5  | 0.0             | 9.1              | 93.6  | 0.4             | 15.1             | 101.3 |
|                 | 25–34           |                  |       | 65–74           |                  |       | 25–34           |                  |       | 65–74           |                  |       |
| 1983–1987       | 0.8             | 27.6             | 108.1 | 0.6             | 43.3             | 99.0  | 0.2             | 10.5             | 97.6  | 0.4             | 28.3             | 90.4  |
| 1988–1992       | 1.0             | 25.5             | 133.6 | 0.6             | 35.4             | 100.6 | 0.0             | 7.9              | 90.7  | 0.4             | 23.3             | 89.4  |
| 1993–1997       | 0.2             | 18.7             | 95.9  | 0.8             | 33.8             | 106.0 | 0.2             | 8.7              | 104.0 | 0.0             | 14.1             | 72.5  |
| 1998–2002       | 0.8             | 30.0             | 111.2 | 0.6             | 40.6             | 89.3  | 0.0             | 10.8             | 93.2  | 0.0             | 16.2             | 77.2  |
| 2003–2007       | 0.6             | 32.4             | 104.3 | 1.4             | 49.4             | 115.1 | 0.2             | 13.1             | 100.7 | 0.0             | 15.4             | 82.7  |
| 2008–2012       | 0.4             | 32.4             | 99.4  | 0.6             | 38.6             | 97.7  | 0.0             | 13.4             | 93.4  | 0.4             | 17.9             | 100.7 |
|                 | 35–44           |                  |       | >74 y/o         |                  |       | 35–44           |                  |       | >74 y/o         |                  |       |
| 1983–1987       | 1.4             | 38.1             | 119.7 | 0.4             | 67.8             | 86.5  | 0.8             | 14.2             | 120.0 | 0.8             | 56.7             | 98.3  |
| 1988–1992       | 1.0             | 27.3             | 115.3 | 1.2             | 80.3             | 124.5 | 0.6             | 11.1             | 115.1 | 0.4             | 35.7             | 74.5  |
| 1993–1997       | 0.6             | 25.0             | 101.9 | 0.6             | 52.1             | 100.1 | 0.0             | 7.5              | 88.8  | 0.6             | 31.7             | 92.0  |
| 1998–2002       | 1.2             | 41.4             | 117.6 | 1.0             | 58.7             | 111.4 | 0.0             | 9.3              | 90.1  | 0.6             | 27.5             | 88.4  |
| 2003–2007       | 0.8             | 42.5             | 106.1 | 1.2             | 52.8             | 117.3 | 0.4             | 13.6             | 107.9 | 0.8             | 23.9             | 106.5 |
| 2008–2012       | 1.4             | 43.5             | 116.9 | 0.8             | 41.1             | 99.0  | 0.2             | 13.6             | 100.1 | 0.8             | 20.5             | 106.5 |

Secondary Medical Zone ID: 306

|                 | Male            |                  |       |                 |                  |       | Female          |                  |       |                 |                  |       |
|-----------------|-----------------|------------------|-------|-----------------|------------------|-------|-----------------|------------------|-------|-----------------|------------------|-------|
|                 | Suicide         |                  |       | Suicide         |                  |       | Suicide         |                  |       | Suicide         |                  |       |
|                 | Num<br>per year | Rate<br>/100,000 | × 100 | Num<br>per year | Rate<br>/100,000 | × 100 | Num<br>per year | Rate<br>/100,000 | × 100 | Num<br>per year | Rate<br>/100,000 | × 100 |
|                 |                 |                  |       |                 |                  |       |                 |                  |       |                 |                  |       |
| Total (>10 y/o) | 45–54           | Total (>10 y/o)  | 45–54 |                 |                  |       |                 |                  |       |                 |                  |       |
| 1983–1987       | 6.4             | 32.5             | 100.5 | 2.0             | 53.8             | 106.3 | 1.8             | 13.8             | 77.4  | 0.2             | 15.0             | 86.9  |
| 1988–1992       | 6.8             | 26.8             | 122.5 | 1.6             | 40.8             | 118.8 | 2.6             | 12.3             | 92.1  | 0.4             | 14.4             | 98.6  |
| 1993–1997       | 4.8             | 25.1             | 97.9  | 1.0             | 36.0             | 98.5  | 3.2             | 11.1             | 108.3 | 0.2             | 12.1             | 93.4  |
| 1998–2002       | 8.2             | 37.1             | 109.1 | 2.4             | 61.9             | 110.6 | 2.8             | 12.7             | 97.5  | 0.4             | 14.8             | 98.1  |
| 2003–2007       | 9.8             | 39.2             | 127.3 | 2.0             | 59.9             | 107.0 | 4.2             | 13.2             | 117.5 | 0.0             | 11.9             | 86.7  |
| 2008–2012       | 7.8             | 35.6             | 115.3 | 1.2             | 48.5             | 99.8  | 2.4             | 13.1             | 99.8  | 0.4             | 15.3             | 102.6 |
|                 | 15–24           |                  |       | 55–64           |                  |       | 15–24           |                  |       | 55–64           |                  |       |
| 1983–1987       | 0.4             | 14.6             | 104.4 | 1.6             | 47.8             | 112.6 | 0.0             | 6.1              | 89.6  | 0.2             | 16.9             | 85.6  |
| 1988–1992       | 0.4             | 10.7             | 108.6 | 1.2             | 36.8             | 103.6 | 0.0             | 4.8              | 90.9  | 0.2             | 15.5             | 87.0  |
| 1993–1997       | 0.2             | 11.2             | 98.6  | 1.0             | 38.5             | 95.6  | 0.0             | 4.8              | 91.9  | 0.8             | 17.8             | 112.0 |
| 1998–2002       | 0.8             | 18.7             | 118.4 | 1.8             | 66.0             | 103.8 | 0.0             | 6.5              | 92.5  | 0.6             | 19.1             | 101.7 |
| 2003–2007       | 0.4             | 18.3             | 104.8 | 3.4             | 80.9             | 140.1 | 0.4             | 10.7             | 119.0 | 1.6             | 21.8             | 129.9 |
| 2008–2012       | 0.2             | 21.0             | 99.0  | 2.2             | 55.0             | 113.2 | 0.2             | 10.5             | 107.9 | 0.4             | 14.7             | 98.9  |
|                 | 25–34           |                  |       | 65–74           |                  |       | 25–34           |                  |       | 65–74           |                  |       |
| 1983–1987       | 0.4             | 21.6             | 84.3  | 0.8             | 46.8             | 106.9 | 0.0             | 8.7              | 81.1  | 0.4             | 28.1             | 89.8  |
| 1988–1992       | 1.4             | 26.8             | 140.1 | 0.6             | 35.2             | 99.8  | 0.2             | 8.4              | 97.4  | 0.4             | 23.2             | 89.0  |
| 1993–1997       | 0.8             | 22.4             | 114.4 | 0.6             | 30.7             | 96.2  | 0.0             | 7.5              | 89.7  | 1.2             | 26.2             | 134.3 |
| 1998–2002       | 0.4             | 25.8             | 95.4  | 1.4             | 48.4             | 106.3 | 0.2             | 11.4             | 98.7  | 0.6             | 20.7             | 98.7  |
| 2003–2007       | 0.8             | 32.5             | 104.7 | 1.4             | 46.9             | 109.3 | 0.2             | 12.8             | 98.4  | 1.2             | 23.2             | 124.4 |
| 2008–2012       | 1.0             | 36.0             | 110.7 | 1.4             | 45.1             | 114.2 | 0.2             | 14.2             | 99.3  | 0.8             | 19.7             | 110.6 |
|                 | 35–44           |                  |       | >74 y/o         |                  |       | 35–44           |                  |       | >74 y/o         |                  |       |
| 1983–1987       | 1.0             | 31.8             | 100.0 | 0.2             | 61.9             | 79.1  | 0.4             | 11.8             | 100.1 | 0.6             | 51.1             | 88.6  |
| 1988–1992       | 1.2             | 26.7             | 112.8 | 0.4             | 57.4             | 89.0  | 1.0             | 12.3             | 127.4 | 0.4             | 36.9             | 77.2  |
| 1993–1997       | 1.2             | 28.1             | 114.6 | 0.0             | 35.7             | 68.6  | 0.8             | 11.1             | 130.6 | 0.2             | 23.6             | 68.6  |
| 1998–2002       | 1.2             | 37.6             | 106.8 | 0.2             | 41.5             | 78.8  | 0.8             | 13.1             | 126.3 | 0.2             | 21.0             | 67.6  |
| 2003–2007       | 1.0             | 41.5             | 103.6 | 0.8             | 45.8             | 101.7 | 0.2             | 12.3             | 97.6  | 0.6             | 21.6             | 96.1  |
| 2008–2012       | 0.6             | 36.3             | 97.6  | 1.2             | 46.0             | 111.0 | 0.2             | 13.4             | 98.8  | 0.2             | 14.9             | 77.5  |

Secondary Medical Zone ID: 307

|                 | Male            |                  |       |                 |                  |       | Female          |                  |       |                 |                  |       |
|-----------------|-----------------|------------------|-------|-----------------|------------------|-------|-----------------|------------------|-------|-----------------|------------------|-------|
|                 | Suicide         |                  |       | Suicide         |                  |       | Suicide         |                  |       | Suicide         |                  |       |
|                 | Num<br>per year | Rate<br>/100,000 | × 100 | Num<br>per year | Rate<br>/100,000 | × 100 | Num<br>per year | Rate<br>/100,000 | × 100 | Num<br>per year | Rate<br>/100,000 | × 100 |
|                 |                 |                  |       |                 |                  |       |                 |                  |       |                 |                  |       |
| Total (>10 y/o) | 45–54           | Total (>10 y/o)  | 45–54 |                 |                  |       |                 |                  |       |                 |                  |       |
| 1983–1987       | 78.0            | 32.1             | 98.8  | 18.0            | 48.4             | 95.7  | 38.0            | 13.4             | 85.3  | 7.0             | 16.6             | 96.1  |
| 1988–1992       | 67.0            | 24.8             | 100.7 | 15.4            | 38.5             | 112.1 | 29.2            | 9.6              | 68.7  | 4.4             | 11.3             | 77.1  |
| 1993–1997       | 65.6            | 22.9             | 89.2  | 19.8            | 41.7             | 114.0 | 34.0            | 9.8              | 84.7  | 5.4             | 11.2             | 86.7  |
| 1998–2002       | 105.8           | 34.7             | 94.6  | 29.0            | 58.0             | 103.6 | 44.2            | 11.9             | 89.9  | 8.2             | 15.1             | 100.4 |
| 2003–2007       | 114.4           | 36.5             | 98.1  | 29.2            | 61.9             | 110.7 | 45.2            | 11.7             | 92.5  | 7.8             | 14.9             | 108.4 |
| 2008–2012       | 104.6           | 33.7             | 95.6  | 21.8            | 50.0             | 102.8 | 44.6            | 12.7             | 91.0  | 6.0             | 13.0             | 87.3  |
|                 | 15–24           |                  |       | 55–64           |                  |       | 15–24           |                  |       | 55–64           |                  |       |
| 1983–1987       | 7.4             | 15.2             | 109.2 | 11.8            | 41.4             | 97.4  | 3.4             | 6.9              | 101.2 | 6.0             | 17.5             | 88.9  |
| 1988–1992       | 4.2             | 8.4              | 84.8  | 11.2            | 33.1             | 93.1  | 1.8             | 4.0              | 75.4  | 5.2             | 14.2             | 79.7  |
| 1993–1997       | 4.4             | 8.5              | 75.1  | 12.8            | 36.7             | 91.1  | 2.4             | 4.7              | 89.8  | 6.2             | 15.1             | 94.8  |
| 1998–2002       | 6.2             | 12.3             | 77.7  | 23.4            | 63.1             | 99.4  | 3.2             | 6.6              | 93.8  | 7.2             | 17.2             | 91.2  |
| 2003–2007       | 5.4             | 12.7             | 72.8  | 24.6            | 56.7             | 98.2  | 2.8             | 6.9              | 76.3  | 10.4            | 19.8             | 118.5 |
| 2008–2012       | 6.8             | 17.8             | 83.9  | 23.6            | 49.3             | 101.5 | 3.4             | 8.8              | 90.3  | 8.2             | 15.3             | 102.8 |
|                 | 25–34           |                  |       | 65–74           |                  |       | 25–34           |                  |       | 65–74           |                  |       |
| 1983–1987       | 11.6            | 25.4             | 99.3  | 6.8             | 42.0             | 95.9  | 5.2             | 10.4             | 96.9  | 5.2             | 24.2             | 77.6  |
| 1988–1992       | 8.2             | 19.0             | 99.2  | 6.6             | 33.7             | 95.5  | 3.0             | 6.8              | 78.8  | 3.6             | 14.8             | 56.7  |
| 1993–1997       | 6.8             | 16.3             | 83.2  | 4.8             | 21.1             | 66.1  | 6.0             | 11.0             | 132.3 | 5.0             | 15.6             | 80.1  |
| 1998–2002       | 14.6            | 30.2             | 111.8 | 10.6            | 36.8             | 81.0  | 7.4             | 13.5             | 116.6 | 9.0             | 23.2             | 110.5 |
| 2003–2007       | 15.8            | 32.8             | 105.6 | 12.6            | 40.1             | 93.4  | 5.4             | 11.1             | 85.6  | 7.4             | 18.6             | 99.9  |
| 2008–2012       | 10.4            | 25.8             | 79.1  | 11.8            | 36.9             | 93.4  | 7.0             | 14.7             | 102.5 | 5.0             | 13.8             | 77.5  |
|                 | 35–44           |                  |       | >74 y/o         |                  |       | 35–44           |                  |       | >74 y/o         |                  |       |
| 1983–1987       | 17.4            | 36.3             | 113.9 | 4.6             | 55.3             | 70.6  | 5.0             | 10.2             | 86.2  | 6.2             | 43.2             | 74.9  |
| 1988–1992       | 16.4            | 30.8             | 130.1 | 4.8             | 43.1             | 66.8  | 5.4             | 9.7              | 100.9 | 5.8             | 28.1             | 58.6  |
| 1993–1997       | 11.0            | 23.0             | 93.7  | 5.6             | 40.8             | 78.4  | 4.2             | 8.2              | 96.4  | 4.8             | 18.9             | 54.8  |
| 1998–2002       | 16.2            | 35.8             | 101.8 | 5.6             | 34.5             | 65.5  | 2.8             | 6.8              | 66.1  | 6.0             | 18.7             | 60.2  |
| 2003–2007       | 19.0            | 42.7             | 106.6 | 7.8             | 34.9             | 77.4  | 4.2             | 9.6              | 76.2  | 7.2             | 17.5             | 78.0  |
| 2008–2012       | 22.6            | 46.3             | 124.5 | 7.6             | 28.8             | 69.5  | 9.6             | 17.2             | 127.1 | 5.2             | 11.5             | 59.9  |

Secondary Medical Zone ID: 308

|                 | Male            |                  |       |                 |                  |       | Female          |                  |       |                 |                  |       |
|-----------------|-----------------|------------------|-------|-----------------|------------------|-------|-----------------|------------------|-------|-----------------|------------------|-------|
|                 | Suicide         |                  |       | Suicide         |                  |       | Suicide         |                  |       | Suicide         |                  |       |
|                 | Num<br>per year | Rate<br>/100,000 | × 100 | Num<br>per year | Rate<br>/100,000 | × 100 | Num<br>per year | Rate<br>/100,000 | × 100 | Num<br>per year | Rate<br>/100,000 | × 100 |
|                 |                 |                  |       |                 |                  |       |                 |                  |       |                 |                  |       |
| Total (>10 y/o) | 45–54           | Total (>10 y/o)  | 45–54 |                 |                  |       |                 |                  |       |                 |                  |       |
| 1983–1987       | 17.0            | 34.4             | 110.9 | 4.4             | 57.9             | 114.5 | 7.8             | 14.5             | 90.7  | 1.0             | 15.7             | 90.9  |
| 1988–1992       | 15.6            | 28.0             | 122.3 | 3.6             | 44.0             | 128.1 | 6.0             | 11.5             | 79.9  | 1.2             | 15.0             | 102.8 |
| 1993–1997       | 11.6            | 24.6             | 92.6  | 2.6             | 35.6             | 97.3  | 5.0             | 9.6              | 78.3  | 1.0             | 12.9             | 100.0 |
| 1998–2002       | 18.2            | 35.4             | 96.6  | 5.0             | 58.5             | 104.6 | 7.0             | 12.1             | 88.0  | 1.2             | 14.9             | 98.9  |
| 2003–2007       | 20.2            | 37.4             | 104.1 | 5.4             | 64.7             | 115.6 | 5.6             | 11.6             | 81.8  | 0.8             | 12.6             | 91.9  |
| 2008–2012       | 19.6            | 36.0             | 107.5 | 4.8             | 58.8             | 121.1 | 8.4             | 12.8             | 102.8 | 1.0             | 14.6             | 97.7  |
|                 | 15–24           |                  |       | 55–64           |                  |       | 15–24           |                  |       | 55–64           |                  |       |
| 1983–1987       | 1.6             | 18.3             | 131.2 | 4.2             | 54.9             | 129.3 | 0.8             | 8.0              | 117.8 | 0.6             | 14.7             | 74.7  |
| 1988–1992       | 0.4             | 9.2              | 92.5  | 2.4             | 34.5             | 97.2  | 0.0             | 4.1              | 77.1  | 0.6             | 14.0             | 78.1  |
| 1993–1997       | 0.2             | 9.4              | 82.7  | 2.4             | 37.5             | 93.1  | 0.2             | 4.7              | 90.8  | 0.4             | 11.7             | 73.3  |
| 1998–2002       | 1.0             | 15.9             | 100.4 | 3.4             | 56.2             | 88.4  | 0.4             | 6.9              | 97.7  | 1.0             | 17.0             | 90.6  |
| 2003–2007       | 0.8             | 16.4             | 94.2  | 4.8             | 60.7             | 105.1 | 0.4             | 8.4              | 93.5  | 1.2             | 16.3             | 97.3  |
| 2008–2012       | 1.2             | 22.0             | 103.8 | 4.0             | 47.9             | 98.7  | 0.4             | 9.3              | 95.5  | 2.0             | 17.3             | 116.3 |
|                 | 25–34           |                  |       | 65–74           |                  |       | 25–34           |                  |       | 65–74           |                  |       |
| 1983–1987       | 3.2             | 34.2             | 133.6 | 0.8             | 33.0             | 75.3  | 1.0             | 11.6             | 107.9 | 2.2             | 35.7             | 114.2 |
| 1988–1992       | 2.8             | 30.1             | 157.5 | 1.6             | 35.4             | 100.4 | 1.2             | 11.1             | 128.6 | 0.8             | 18.3             | 70.1  |
| 1993–1997       | 1.8             | 23.8             | 121.8 | 1.0             | 24.5             | 76.9  | 0.4             | 7.9              | 94.5  | 0.8             | 14.9             | 76.6  |
| 1998–2002       | 0.8             | 22.7             | 84.1  | 2.8             | 44.2             | 97.3  | 1.2             | 13.4             | 115.8 | 1.0             | 17.2             | 82.0  |
| 2003–2007       | 2.6             | 35.9             | 115.8 | 2.4             | 40.1             | 93.4  | 0.4             | 11.3             | 86.8  | 0.8             | 15.4             | 82.5  |
| 2008–2012       | 1.8             | 32.2             | 98.9  | 2.6             | 40.6             | 102.8 | 0.8             | 14.2             | 99.2  | 1.0             | 16.4             | 92.4  |
|                 | 35–44           |                  |       | >74 y/o         |                  |       | 35–44           |                  |       | >74 y/o         |                  |       |
| 1983–1987       | 2.0             | 29.4             | 92.3  | 0.8             | 52.5             | 67.1  | 1.0             | 12.2             | 103.5 | 1.2             | 38.8             | 67.3  |
| 1988–1992       | 3.4             | 32.7             | 138.1 | 1.2             | 50.4             | 78.1  | 1.0             | 10.4             | 108.0 | 1.2             | 30.0             | 62.8  |
| 1993–1997       | 2.2             | 26.7             | 108.7 | 1.4             | 45.3             | 87.0  | 0.6             | 8.3              | 97.1  | 1.6             | 27.8             | 80.9  |
| 1998–2002       | 3.4             | 42.1             | 119.6 | 1.8             | 47.6             | 90.3  | 0.8             | 10.5             | 102.0 | 1.4             | 21.7             | 69.8  |
| 2003–2007       | 2.0             | 35.7             | 89.1  | 2.2             | 43.4             | 96.4  | 1.0             | 13.2             | 104.7 | 1.0             | 14.1             | 62.9  |
| 2008–2012       | 3.0             | 41.7             | 112.2 | 2.2             | 37.9             | 91.2  | 0.6             | 12.6             | 92.9  | 2.6             | 22.0             | 114.6 |

Secondary Medical Zone ID: 309

|                 | Male            |                  |       |                 |                  |       | Female          |                  |       |                 |                  |       |
|-----------------|-----------------|------------------|-------|-----------------|------------------|-------|-----------------|------------------|-------|-----------------|------------------|-------|
|                 | Suicide         |                  |       | Suicide         |                  |       | Suicide         |                  |       | Suicide         |                  |       |
|                 | Num<br>per year | Rate<br>/100,000 | × 100 | Num<br>per year | Rate<br>/100,000 | × 100 | Num<br>per year | Rate<br>/100,000 | × 100 | Num<br>per year | Rate<br>/100,000 | × 100 |
|                 |                 |                  |       |                 |                  |       |                 |                  |       |                 |                  |       |
| Total (>10 y/o) | 45–54           | Total (>10 y/o)  | 45–54 |                 |                  |       |                 |                  |       |                 |                  |       |
| 1983–1987       | 24.4            | 31.8             | 97.1  | 6.2             | 52.1             | 103.1 | 11.0            | 13.3             | 79.5  | 2.2             | 16.9             | 98.1  |
| 1988–1992       | 24.6            | 27.9             | 119.4 | 3.6             | 33.3             | 97.0  | 12.0            | 11.8             | 89.6  | 1.2             | 12.7             | 86.8  |
| 1993–1997       | 23.0            | 26.7             | 109.1 | 7.6             | 51.2             | 139.9 | 10.6            | 10.3             | 91.1  | 1.2             | 11.5             | 89.0  |
| 1998–2002       | 30.0            | 36.5             | 99.8  | 8.0             | 58.2             | 104.0 | 13.6            | 12.6             | 98.8  | 2.0             | 15.0             | 99.5  |
| 2003–2007       | 38.6            | 42.7             | 125.8 | 8.4             | 65.8             | 117.7 | 12.8            | 12.2             | 100.0 | 1.2             | 12.1             | 88.3  |
| 2008–2012       | 31.4            | 36.2             | 112.8 | 5.0             | 50.3             | 103.4 | 13.2            | 13.2             | 104.8 | 2.0             | 16.6             | 111.4 |
|                 | 15–24           |                  |       | 55–64           |                  |       | 15–24           |                  |       | 55–64           |                  |       |
| 1983–1987       | 1.6             | 14.9             | 107.1 | 5.6             | 48.7             | 114.7 | 1.0             | 7.7              | 113.3 | 2.0             | 17.3             | 87.8  |
| 1988–1992       | 0.8             | 9.4              | 94.8  | 4.2             | 35.8             | 100.8 | 0.4             | 4.8              | 91.7  | 2.0             | 16.3             | 91.2  |
| 1993–1997       | 1.6             | 12.9             | 114.1 | 4.2             | 38.4             | 95.3  | 0.0             | 3.5              | 68.0  | 2.2             | 16.3             | 102.5 |
| 1998–2002       | 1.4             | 15.1             | 95.6  | 6.8             | 62.6             | 98.6  | 0.8             | 7.3              | 103.9 | 3.2             | 21.7             | 115.1 |
| 2003–2007       | 2.2             | 20.2             | 115.5 | 8.6             | 66.3             | 114.9 | 0.6             | 8.0              | 89.4  | 3.4             | 20.5             | 122.2 |
| 2008–2012       | 1.8             | 22.3             | 105.2 | 8.2             | 55.0             | 113.2 | 0.6             | 8.9              | 91.9  | 3.4             | 18.7             | 125.4 |
|                 | 25–34           |                  |       | 65–74           |                  |       | 25–34           |                  |       | 65–74           |                  |       |
| 1983–1987       | 4.0             | 29.7             | 116.2 | 1.2             | 27.9             | 63.8  | 1.2             | 10.3             | 95.3  | 1.8             | 23.8             | 76.3  |
| 1988–1992       | 4.2             | 32.5             | 170.1 | 2.8             | 35.2             | 99.9  | 0.8             | 8.3              | 96.3  | 3.4             | 29.6             | 113.3 |
| 1993–1997       | 1.0             | 16.1             | 82.6  | 2.2             | 26.5             | 82.9  | 1.0             | 9.1              | 109.9 | 3.0             | 22.7             | 116.4 |
| 1998–2002       | 2.4             | 27.6             | 102.1 | 3.6             | 39.2             | 86.1  | 1.0             | 11.5             | 98.9  | 3.0             | 22.3             | 106.4 |
| 2003–2007       | 4.0             | 38.1             | 123.0 | 6.0             | 52.9             | 123.4 | 0.2             | 9.4              | 72.0  | 2.8             | 20.4             | 109.8 |
| 2008–2012       | 2.6             | 31.7             | 97.2  | 4.8             | 44.6             | 113.0 | 1.2             | 14.3             | 99.9  | 1.2             | 14.4             | 81.2  |
|                 | 35–44           |                  |       | >74 y/o         |                  |       | 35–44           |                  |       | >74 y/o         |                  |       |
| 1983–1987       | 3.2             | 27.8             | 87.3  | 2.6             | 67.5             | 86.2  | 1.2             | 10.8             | 91.4  | 1.6             | 32.2             | 55.9  |
| 1988–1992       | 5.6             | 34.6             | 145.8 | 3.4             | 66.4             | 102.9 | 1.0             | 8.8              | 91.5  | 3.2             | 40.3             | 84.2  |
| 1993–1997       | 3.8             | 28.9             | 118.1 | 2.6             | 47.0             | 90.2  | 1.2             | 9.1              | 106.5 | 2.0             | 22.4             | 65.1  |
| 1998–2002       | 4.8             | 43.2             | 122.7 | 2.8             | 44.1             | 83.6  | 1.0             | 10.0             | 97.0  | 2.6             | 22.7             | 73.2  |
| 2003–2007       | 4.8             | 49.7             | 124.0 | 4.6             | 51.4             | 114.2 | 1.2             | 12.7             | 100.6 | 3.4             | 22.5             | 100.4 |
| 2008–2012       | 3.8             | 40.1             | 107.9 | 5.0             | 48.2             | 116.2 | 1.2             | 13.5             | 99.7  | 3.6             | 20.5             | 106.7 |

Secondary Medical Zone ID: 310

|                 | Male            |                  |       |                 |                  |       | Female          |                  |       |                 |                  |       |
|-----------------|-----------------|------------------|-------|-----------------|------------------|-------|-----------------|------------------|-------|-----------------|------------------|-------|
|                 | Suicide         |                  |       | Suicide         |                  |       | Suicide         |                  |       | Suicide         |                  |       |
|                 | Num<br>per year | Rate<br>/100,000 | × 100 | Num<br>per year | Rate<br>/100,000 | × 100 | Num<br>per year | Rate<br>/100,000 | × 100 | Num<br>per year | Rate<br>/100,000 | × 100 |
|                 |                 |                  |       |                 |                  |       |                 |                  |       |                 |                  |       |
| Total (>10 y/o) | 45–54           | Total (>10 y/o)  | 45–54 |                 |                  |       |                 |                  |       |                 |                  |       |
| 1983–1987       | 10.8            | 35.0             | 116.7 | 2.2             | 53.0             | 104.9 | 3.2             | 13.5             | 77.1  | 0.8             | 17.4             | 100.9 |
| 1988–1992       | 8.2             | 25.8             | 112.8 | 2.0             | 41.7             | 121.4 | 4.8             | 12.5             | 97.9  | 0.6             | 14.6             | 100.0 |
| 1993–1997       | 7.2             | 25.6             | 101.4 | 1.6             | 37.8             | 103.3 | 4.6             | 11.0             | 104.1 | 0.4             | 12.3             | 95.1  |
| 1998–2002       | 10.2            | 36.1             | 100.9 | 3.0             | 61.1             | 109.2 | 4.4             | 12.5             | 96.1  | 0.6             | 14.8             | 98.2  |
| 2003–2007       | 11.0            | 38.1             | 107.9 | 1.4             | 45.9             | 82.1  | 4.0             | 12.4             | 96.8  | 0.2             | 12.1             | 88.5  |
| 2008–2012       | 9.4             | 33.9             | 103.0 | 1.0             | 43.4             | 89.4  | 2.4             | 12.1             | 85.7  | 0.4             | 14.4             | 96.4  |
|                 | 15–24           |                  |       | 55–64           |                  |       | 15–24           |                  |       | 55–64           |                  |       |
| 1983–1987       | 0.4             | 13.7             | 98.2  | 1.4             | 40.6             | 95.5  | 0.2             | 6.7              | 98.1  | 0.4             | 16.4             | 82.9  |
| 1988–1992       | 0.6             | 11.2             | 112.8 | 1.8             | 39.1             | 110.1 | 0.2             | 5.4              | 102.0 | 1.4             | 20.8             | 116.7 |
| 1993–1997       | 0.2             | 10.6             | 94.0  | 2.8             | 51.8             | 128.6 | 0.0             | 4.6              | 87.3  | 1.0             | 17.6             | 110.7 |
| 1998–2002       | 0.8             | 17.5             | 110.9 | 1.6             | 56.4             | 88.8  | 0.2             | 7.0              | 99.4  | 0.8             | 18.9             | 100.5 |
| 2003–2007       | 0.4             | 17.0             | 97.4  | 3.2             | 67.5             | 116.9 | 0.4             | 9.9              | 110.1 | 1.6             | 20.4             | 122.1 |
| 2008–2012       | 0.2             | 19.2             | 90.8  | 3.0             | 54.8             | 112.8 | 0.2             | 9.5              | 97.6  | 0.4             | 13.9             | 92.9  |
|                 | 25–34           |                  |       | 65–74           |                  |       | 25–34           |                  |       | 65–74           |                  |       |
| 1983–1987       | 1.6             | 30.1             | 117.8 | 1.4             | 48.5             | 110.7 | 0.2             | 9.5              | 88.1  | 0.8             | 28.1             | 89.9  |
| 1988–1992       | 0.6             | 19.0             | 99.5  | 0.8             | 33.0             | 93.5  | 0.4             | 9.1              | 105.1 | 0.8             | 23.5             | 90.0  |
| 1993–1997       | 0.8             | 21.6             | 110.4 | 0.6             | 26.5             | 83.2  | 0.2             | 8.1              | 97.1  | 0.6             | 17.2             | 88.2  |
| 1998–2002       | 2.0             | 35.8             | 132.6 | 1.6             | 44.9             | 98.8  | 0.8             | 13.6             | 117.5 | 1.0             | 21.3             | 101.6 |
| 2003–2007       | 1.4             | 35.5             | 114.4 | 1.4             | 41.8             | 97.3  | 0.2             | 12.2             | 94.0  | 0.8             | 18.6             | 99.7  |
| 2008–2012       | 0.6             | 30.7             | 94.4  | 1.6             | 42.3             | 107.2 | 0.2             | 13.5             | 94.4  | 0.6             | 17.3             | 97.2  |
|                 | 35–44           |                  |       | >74 y/o         |                  |       | 35–44           |                  |       | >74 y/o         |                  |       |
| 1983–1987       | 1.4             | 33.0             | 103.5 | 2.4             | 110.2            | 140.7 | 0.4             | 11.4             | 96.3  | 0.4             | 32.2             | 55.8  |
| 1988–1992       | 1.2             | 24.9             | 105.2 | 1.0             | 58.7             | 91.1  | 0.4             | 9.5              | 98.8  | 1.0             | 37.3             | 78.0  |
| 1993–1997       | 1.2             | 26.4             | 107.8 | 0.0             | 27.4             | 52.7  | 0.6             | 9.7              | 113.8 | 1.8             | 41.5             | 120.6 |
| 1998–2002       | 0.6             | 29.7             | 84.2  | 0.6             | 39.3             | 74.5  | 0.2             | 9.6              | 92.5  | 0.8             | 22.5             | 72.4  |
| 2003–2007       | 2.2             | 53.7             | 134.0 | 1.0             | 38.8             | 86.3  | 0.2             | 11.8             | 93.1  | 0.6             | 15.7             | 70.0  |
| 2008–2012       | 1.0             | 37.0             | 99.5  | 2.0             | 47.1             | 113.6 | 0.0             | 11.9             | 87.7  | 0.6             | 14.6             | 75.8  |

Secondary Medical Zone ID: 311

|                 | Male            |                  |       |                 |                  |       | Female          |                  |       |                 |                  |       |
|-----------------|-----------------|------------------|-------|-----------------|------------------|-------|-----------------|------------------|-------|-----------------|------------------|-------|
|                 | Suicide         |                  |       | Suicide         |                  |       | Suicide         |                  |       | Suicide         |                  |       |
|                 | Num<br>per year | Rate<br>/100,000 | × 100 | Num<br>per year | Rate<br>/100,000 | × 100 | Num<br>per year | Rate<br>/100,000 | × 100 | Num<br>per year | Rate<br>/100,000 | × 100 |
|                 |                 |                  |       |                 |                  |       |                 |                  |       |                 |                  |       |
| Total (>10 y/o) | 45–54           | Total (>10 y/o)  | 45–54 |                 |                  |       |                 |                  |       |                 |                  |       |
| 1983–1987       | 20.8            | 35.6             | 118.3 | 4.2             | 53.0             | 104.8 | 7.6             | 13.9             | 85.5  | 0.8             | 14.2             | 82.5  |
| 1988–1992       | 12.2            | 22.6             | 86.7  | 2.4             | 31.6             | 92.1  | 9.4             | 12.7             | 98.4  | 2.0             | 17.2             | 117.5 |
| 1993–1997       | 20.0            | 27.7             | 116.9 | 3.4             | 34.9             | 95.5  | 7.2             | 10.1             | 86.2  | 1.0             | 11.7             | 91.0  |
| 1998–2002       | 28.8            | 38.9             | 110.9 | 8.6             | 67.2             | 120.0 | 11.2            | 13.0             | 101.0 | 2.4             | 16.9             | 112.4 |
| 2003–2007       | 32.0            | 40.5             | 115.0 | 8.8             | 72.1             | 129.0 | 9.2             | 11.8             | 89.1  | 1.0             | 11.6             | 84.9  |
| 2008–2012       | 29.8            | 35.3             | 108.1 | 5.4             | 50.4             | 103.7 | 9.6             | 12.0             | 90.2  | 1.4             | 14.0             | 93.9  |
|                 | 15–24           |                  |       | 55–64           |                  |       | 15–24           |                  |       | 55–64           |                  |       |
| 1983–1987       | 2.0             | 19.4             | 138.8 | 4.4             | 53.1             | 125.0 | 0.8             | 7.7              | 113.2 | 1.4             | 18.7             | 94.7  |
| 1988–1992       | 0.8             | 9.7              | 98.4  | 1.8             | 27.9             | 78.4  | 0.6             | 5.7              | 108.1 | 1.6             | 17.7             | 99.4  |
| 1993–1997       | 1.0             | 10.9             | 96.8  | 4.6             | 48.4             | 120.2 | 0.4             | 4.8              | 92.9  | 1.2             | 14.6             | 91.8  |
| 1998–2002       | 2.2             | 18.2             | 115.5 | 5.6             | 64.7             | 101.9 | 0.6             | 6.7              | 95.0  | 1.0             | 15.9             | 84.2  |
| 2003–2007       | 1.2             | 15.5             | 89.0  | 5.8             | 56.5             | 97.9  | 1.0             | 9.6              | 106.6 | 2.0             | 17.3             | 103.1 |
| 2008–2012       | 1.6             | 19.7             | 92.8  | 7.8             | 57.1             | 117.6 | 0.6             | 8.7              | 89.4  | 1.2             | 12.9             | 86.3  |
|                 | 25–34           |                  |       | 65–74           |                  |       | 25–34           |                  |       | 65–74           |                  |       |
| 1983–1987       | 2.6             | 27.0             | 105.7 | 1.2             | 36.9             | 84.2  | 1.2             | 11.4             | 105.6 | 1.4             | 28.8             | 92.2  |
| 1988–1992       | 0.8             | 14.3             | 74.8  | 1.4             | 31.2             | 88.6  | 0.8             | 8.7              | 100.3 | 1.6             | 24.9             | 95.3  |
| 1993–1997       | 1.8             | 20.6             | 105.5 | 2.2             | 32.7             | 102.7 | 0.8             | 8.5              | 102.2 | 1.8             | 20.9             | 107.4 |
| 1998–2002       | 2.4             | 26.7             | 98.9  | 2.4             | 38.0             | 83.7  | 1.0             | 11.2             | 96.9  | 2.2             | 22.7             | 107.9 |
| 2003–2007       | 3.2             | 30.6             | 98.6  | 4.0             | 47.6             | 110.9 | 1.2             | 12.4             | 95.4  | 2.2             | 20.9             | 112.3 |
| 2008–2012       | 3.0             | 29.8             | 91.4  | 3.8             | 43.5             | 110.2 | 1.4             | 13.7             | 95.4  | 0.8             | 14.5             | 81.4  |
|                 | 35–44           |                  |       | >74 y/o         |                  |       | 35–44           |                  |       | >74 y/o         |                  |       |
| 1983–1987       | 4.0             | 37.7             | 118.5 | 2.4             | 90.4             | 115.4 | 1.0             | 11.4             | 96.6  | 1.0             | 36.4             | 63.1  |
| 1988–1992       | 3.2             | 26.8             | 112.9 | 1.8             | 59.7             | 92.6  | 1.0             | 9.5              | 97.9  | 1.8             | 37.2             | 77.6  |
| 1993–1997       | 4.6             | 35.1             | 143.1 | 2.4             | 58.8             | 112.9 | 0.8             | 7.9              | 93.5  | 1.2             | 22.2             | 64.6  |
| 1998–2002       | 5.2             | 45.4             | 128.8 | 2.4             | 51.5             | 97.7  | 2.2             | 14.4             | 138.9 | 1.8             | 24.0             | 77.2  |
| 2003–2007       | 5.6             | 52.0             | 129.8 | 3.4             | 51.3             | 113.9 | 0.6             | 10.2             | 81.0  | 1.2             | 14.6             | 64.9  |
| 2008–2012       | 3.8             | 36.0             | 96.8  | 4.4             | 52.1             | 125.6 | 1.2             | 12.6             | 92.8  | 3.0             | 22.6             | 117.3 |



Secondary Medical Zone ID: 312

|                 | Male            |                  |       |                 |                  |       | Female          |                  |       |                 |                  |       |
|-----------------|-----------------|------------------|-------|-----------------|------------------|-------|-----------------|------------------|-------|-----------------|------------------|-------|
|                 | Suicide         |                  |       | Suicide         |                  |       | Suicide         |                  |       | Suicide         |                  |       |
|                 | Num<br>per year | Rate<br>/100,000 | × 100 | Num<br>per year | Rate<br>/100,000 | × 100 | Num<br>per year | Rate<br>/100,000 | × 100 | Num<br>per year | Rate<br>/100,000 | × 100 |
|                 |                 |                  |       |                 |                  |       |                 |                  |       |                 |                  |       |
| Total (>10 y/o) | 45–54           | Total (>10 y/o)  | 45–54 |                 |                  |       |                 |                  |       |                 |                  |       |
| 1983–1987       | 15.4            | 37.1             | 130.7 | 3.6             | 61.0             | 120.6 | 8.6             | 16.9             | 120.5 | 1.8             | 21.1             | 122.5 |
| 1988–1992       | 11.4            | 27.7             | 123.7 | 2.4             | 42.5             | 123.7 | 7.8             | 14.1             | 120.2 | 1.8             | 19.0             | 130.1 |
| 1993–1997       | 12.2            | 28.6             | 126.8 | 2.4             | 41.3             | 112.9 | 4.4             | 10.3             | 93.2  | 0.8             | 13.7             | 105.9 |
| 1998–2002       | 19.0            | 41.3             | 136.8 | 3.6             | 61.1             | 109.2 | 5.2             | 12.5             | 95.4  | 0.4             | 13.6             | 90.0  |
| 2003–2007       | 17.8            | 42.4             | 133.1 | 3.4             | 62.5             | 111.8 | 7.2             | 13.4             | 117.4 | 1.2             | 16.0             | 116.6 |
| 2008–2012       | 18.0            | 39.3             | 136.8 | 4.8             | 72.7             | 149.5 | 6.2             | 13.1             | 109.5 | 0.8             | 15.7             | 105.6 |
|                 | 15–24           |                  |       | 55–64           |                  |       | 15–24           |                  |       | 55–64           |                  |       |
| 1983–1987       | 0.4             | 12.7             | 90.9  | 3.6             | 56.1             | 132.0 | 0.6             | 8.2              | 119.7 | 1.0             | 18.9             | 95.7  |
| 1988–1992       | 0.6             | 10.7             | 108.4 | 1.0             | 27.7             | 78.0  | 0.2             | 5.3              | 100.6 | 0.6             | 15.4             | 86.3  |
| 1993–1997       | 0.8             | 12.8             | 113.0 | 1.8             | 38.8             | 96.5  | 0.4             | 6.1              | 116.4 | 1.0             | 16.3             | 102.8 |
| 1998–2002       | 1.2             | 18.9             | 119.9 | 5.2             | 88.3             | 139.1 | 0.4             | 7.7              | 109.1 | 0.2             | 15.4             | 81.6  |
| 2003–2007       | 0.6             | 17.4             | 99.6  | 3.8             | 67.3             | 116.7 | 0.0             | 7.4              | 82.6  | 1.4             | 19.0             | 113.3 |
| 2008–2012       | 0.6             | 20.9             | 98.5  | 3.4             | 52.6             | 108.3 | 0.2             | 9.4              | 96.6  | 1.4             | 17.0             | 114.0 |
|                 | 25–34           |                  |       | 65–74           |                  |       | 25–34           |                  |       | 65–74           |                  |       |
| 1983–1987       | 3.0             | 38.0             | 148.6 | 1.2             | 43.5             | 99.3  | 1.6             | 16.1             | 149.2 | 0.4             | 22.4             | 71.6  |
| 1988–1992       | 1.2             | 22.3             | 116.7 | 2.0             | 44.8             | 127.2 | 0.4             | 8.8              | 101.9 | 1.4             | 27.8             | 106.6 |
| 1993–1997       | 1.4             | 24.9             | 127.6 | 1.4             | 32.2             | 101.0 | 0.0             | 7.1              | 84.8  | 1.0             | 19.1             | 98.1  |
| 1998–2002       | 2.0             | 35.0             | 129.5 | 2.6             | 49.3             | 108.3 | 0.6             | 12.6             | 108.5 | 1.6             | 23.7             | 112.8 |
| 2003–2007       | 2.2             | 40.8             | 131.6 | 4.2             | 64.5             | 150.4 | 1.0             | 16.0             | 122.8 | 1.2             | 19.6             | 105.1 |
| 2008–2012       | 1.6             | 36.7             | 112.8 | 2.2             | 44.5             | 112.7 | 0.4             | 14.3             | 99.8  | 0.8             | 17.4             | 97.8  |
|                 | 35–44           |                  |       | >74 y/o         |                  |       | 35–44           |                  |       | >74 y/o         |                  |       |
| 1983–1987       | 2.6             | 40.7             | 127.7 | 1.0             | 65.3             | 83.4  | 1.0             | 13.7             | 116.0 | 2.2             | 71.6             | 124.1 |
| 1988–1992       | 2.6             | 33.3             | 140.4 | 1.6             | 68.7             | 106.4 | 0.8             | 10.8             | 111.8 | 2.6             | 63.6             | 132.9 |
| 1993–1997       | 3.2             | 40.6             | 165.7 | 1.2             | 50.0             | 96.1  | 0.0             | 6.7              | 78.6  | 1.2             | 29.8             | 86.5  |
| 1998–2002       | 2.0             | 40.1             | 113.7 | 2.4             | 64.8             | 122.8 | 0.8             | 12.1             | 117.0 | 1.2             | 25.0             | 80.5  |
| 2003–2007       | 2.8             | 56.6             | 141.3 | 0.8             | 32.0             | 71.2  | 0.2             | 11.4             | 90.5  | 2.2             | 28.6             | 127.5 |
| 2008–2012       | 1.4             | 38.8             | 104.3 | 4.0             | 62.8             | 151.5 | 0.2             | 12.5             | 92.2  | 2.4             | 25.3             | 131.4 |

Secondary Medical Zone ID: 313

|                 | Male            |                  |       |                 |                  |       | Female          |                  |       |                 |                  |       |
|-----------------|-----------------|------------------|-------|-----------------|------------------|-------|-----------------|------------------|-------|-----------------|------------------|-------|
|                 | Suicide         |                  |       | Suicide         |                  |       | Suicide         |                  |       | Suicide         |                  |       |
|                 | Num<br>per year | Rate<br>/100,000 | × 100 | Num<br>per year | Rate<br>/100,000 | × 100 | Num<br>per year | Rate<br>/100,000 | × 100 | Num<br>per year | Rate<br>/100,000 | × 100 |
|                 |                 |                  |       |                 |                  |       |                 |                  |       |                 |                  |       |
| Total (>10 y/o) | 45–54           | Total (>10 y/o)  | 45–54 |                 |                  |       |                 |                  |       |                 |                  |       |
| 1983–1987       | 15.4            | 35.8             | 118.8 | 3.6             | 56.5             | 111.8 | 5.4             | 14.0             | 83.2  | 1.2             | 17.6             | 102.2 |
| 1988–1992       | 9.4             | 24.3             | 95.9  | 3.0             | 43.9             | 127.9 | 5.0             | 11.5             | 82.4  | 0.6             | 13.5             | 92.6  |
| 1993–1997       | 12.6            | 26.9             | 113.8 | 2.6             | 38.9             | 106.3 | 5.2             | 10.5             | 91.0  | 0.4             | 11.3             | 87.6  |
| 1998–2002       | 14.6            | 35.4             | 95.4  | 4.6             | 60.8             | 108.6 | 6.4             | 12.3             | 94.5  | 1.2             | 15.7             | 104.3 |
| 2003–2007       | 17.6            | 38.4             | 110.2 | 4.0             | 59.9             | 107.1 | 7.2             | 12.7             | 104.9 | 1.0             | 14.2             | 103.3 |
| 2008–2012       | 17.8            | 36.3             | 116.5 | 2.6             | 49.1             | 101.0 | 9.6             | 14.2             | 123.3 | 1.2             | 16.6             | 111.2 |
|                 | 15–24           |                  |       | 55–64           |                  |       | 15–24           |                  |       | 55–64           |                  |       |
| 1983–1987       | 1.4             | 18.9             | 135.5 | 2.8             | 46.8             | 110.1 | 0.0             | 5.5              | 79.9  | 0.6             | 16.0             | 80.9  |
| 1988–1992       | 0.4             | 9.7              | 97.6  | 1.6             | 31.0             | 87.3  | 0.2             | 5.0              | 94.7  | 1.2             | 17.8             | 99.7  |
| 1993–1997       | 0.6             | 11.5             | 101.3 | 3.8             | 51.4             | 127.6 | 0.8             | 7.2              | 137.3 | 1.8             | 19.9             | 125.2 |
| 1998–2002       | 0.2             | 12.9             | 81.6  | 2.2             | 51.9             | 81.7  | 0.4             | 7.2              | 102.7 | 1.4             | 19.8             | 105.4 |
| 2003–2007       | 1.0             | 18.6             | 106.4 | 4.4             | 64.4             | 111.6 | 0.2             | 8.0              | 88.9  | 1.4             | 18.0             | 107.2 |
| 2008–2012       | 1.2             | 23.6             | 111.3 | 4.4             | 53.7             | 110.5 | 0.6             | 11.1             | 114.6 | 1.0             | 14.7             | 98.7  |
|                 | 25–34           |                  |       | 65–74           |                  |       | 25–34           |                  |       | 65–74           |                  |       |
| 1983–1987       | 2.2             | 30.4             | 119.0 | 1.2             | 41.2             | 94.0  | 1.0             | 12.5             | 115.8 | 0.8             | 25.3             | 81.1  |
| 1988–1992       | 1.4             | 22.7             | 119.0 | 1.4             | 35.5             | 100.8 | 0.0             | 6.8              | 77.9  | 0.4             | 16.8             | 64.4  |
| 1993–1997       | 1.0             | 20.7             | 106.0 | 1.6             | 32.3             | 101.4 | 0.2             | 7.5              | 90.7  | 0.6             | 14.9             | 76.7  |
| 1998–2002       | 1.2             | 27.3             | 101.1 | 1.8             | 39.8             | 87.6  | 0.6             | 11.8             | 102.1 | 0.8             | 17.4             | 82.9  |
| 2003–2007       | 1.0             | 28.0             | 90.4  | 1.8             | 38.5             | 89.7  | 0.6             | 12.9             | 99.3  | 1.4             | 19.8             | 106.6 |
| 2008–2012       | 2.0             | 36.0             | 110.6 | 2.4             | 42.7             | 108.2 | 1.2             | 16.9             | 117.6 | 1.8             | 21.3             | 119.6 |
|                 | 35–44           |                  |       | >74 y/o         |                  |       | 35–44           |                  |       | >74 y/o         |                  |       |
| 1983–1987       | 2.8             | 38.8             | 122.1 | 1.4             | 72.9             | 93.0  | 0.6             | 11.5             | 97.1  | 1.2             | 43.8             | 76.0  |
| 1988–1992       | 0.4             | 16.0             | 67.4  | 1.2             | 56.2             | 87.1  | 0.4             | 8.9              | 92.1  | 2.0             | 47.5             | 99.2  |
| 1993–1997       | 2.6             | 32.6             | 132.8 | 0.2             | 27.5             | 52.9  | 0.6             | 8.8              | 103.3 | 0.8             | 21.2             | 61.7  |
| 1998–2002       | 2.6             | 41.6             | 118.2 | 2.0             | 54.1             | 102.6 | 0.2             | 8.7              | 83.9  | 1.8             | 28.5             | 91.9  |
| 2003–2007       | 2.8             | 50.4             | 125.8 | 2.6             | 51.6             | 114.6 | 0.6             | 12.5             | 99.2  | 2.0             | 24.3             | 108.5 |
| 2008–2012       | 1.4             | 35.7             | 95.9  | 3.8             | 56.5             | 136.3 | 0.6             | 13.4             | 98.9  | 3.2             | 28.5             | 148.4 |

Secondary Medical Zone ID: 314

|                 | Male            |                  |       |                 |                  |       | Female          |                  |       |                 |                  |       |
|-----------------|-----------------|------------------|-------|-----------------|------------------|-------|-----------------|------------------|-------|-----------------|------------------|-------|
|                 | Suicide         |                  |       | Suicide         |                  |       | Suicide         |                  |       | Suicide         |                  |       |
|                 | Num<br>per year | Rate<br>/100,000 | × 100 | Num<br>per year | Rate<br>/100,000 | × 100 | Num<br>per year | Rate<br>/100,000 | × 100 | Num<br>per year | Rate<br>/100,000 | × 100 |
|                 |                 |                  |       |                 |                  |       |                 |                  |       |                 |                  |       |
| Total (>10 y/o) | 45–54           | Total (>10 y/o)  | 45–54 |                 |                  |       |                 |                  |       |                 |                  |       |
| 1983–1987       | 25.0            | 35.7             | 114.9 | 6.4             | 57.2             | 113.1 | 10.6            | 14.0             | 87.9  | 2.2             | 17.5             | 101.6 |
| 1988–1992       | 23.0            | 29.2             | 130.7 | 5.4             | 46.3             | 134.8 | 9.2             | 11.6             | 84.1  | 1.6             | 14.4             | 98.3  |
| 1993–1997       | 23.6            | 28.3             | 127.4 | 6.2             | 47.8             | 130.5 | 9.4             | 10.6             | 94.6  | 1.6             | 13.3             | 102.7 |
| 1998–2002       | 33.2            | 40.8             | 124.8 | 10.0            | 76.4             | 136.5 | 12.0            | 12.8             | 101.2 | 2.0             | 15.8             | 104.9 |
| 2003–2007       | 32.8            | 42.5             | 125.8 | 9.0             | 78.9             | 141.0 | 11.8            | 12.7             | 104.9 | 1.4             | 13.5             | 98.3  |
| 2008–2012       | 27.2            | 36.5             | 115.3 | 3.8             | 45.6             | 93.8  | 7.6             | 11.7             | 84.2  | 0.8             | 12.6             | 84.5  |
|                 | 15–24           |                  |       | 55–64           |                  |       | 15–24           |                  |       | 55–64           |                  |       |
| 1983–1987       | 1.4             | 14.6             | 104.5 | 3.8             | 42.3             | 99.4  | 0.2             | 5.3              | 77.5  | 2.4             | 20.7             | 104.8 |
| 1988–1992       | 1.0             | 10.3             | 103.7 | 5.0             | 43.8             | 123.2 | 0.4             | 5.0              | 94.0  | 1.4             | 14.9             | 83.4  |
| 1993–1997       | 0.8             | 10.5             | 92.9  | 6.4             | 54.3             | 135.0 | 0.4             | 5.0              | 95.2  | 2.4             | 18.0             | 113.2 |
| 1998–2002       | 1.4             | 16.1             | 101.9 | 7.2             | 71.8             | 113.0 | 0.2             | 5.8              | 81.8  | 2.8             | 21.2             | 112.9 |
| 2003–2007       | 1.2             | 17.0             | 97.3  | 6.6             | 61.8             | 107.1 | 0.2             | 6.9              | 77.1  | 1.8             | 16.4             | 97.9  |
| 2008–2012       | 1.4             | 21.5             | 101.5 | 8.6             | 64.4             | 132.6 | 0.2             | 7.7              | 79.4  | 1.0             | 12.6             | 84.8  |
|                 | 25–34           |                  |       | 65–74           |                  |       | 25–34           |                  |       | 65–74           |                  |       |
| 1983–1987       | 3.8             | 31.2             | 122.0 | 1.6             | 37.6             | 85.8  | 0.2             | 6.9              | 64.1  | 2.0             | 29.3             | 93.8  |
| 1988–1992       | 3.6             | 29.9             | 156.4 | 2.0             | 34.3             | 97.5  | 1.6             | 11.3             | 130.4 | 1.2             | 18.5             | 71.1  |
| 1993–1997       | 0.8             | 15.2             | 78.0  | 3.6             | 40.8             | 128.0 | 1.4             | 10.6             | 127.9 | 1.2             | 14.9             | 76.3  |
| 1998–2002       | 1.8             | 25.2             | 93.3  | 6.0             | 58.1             | 127.8 | 1.0             | 11.7             | 100.9 | 1.4             | 16.3             | 77.5  |
| 2003–2007       | 2.4             | 31.3             | 100.9 | 5.6             | 55.6             | 129.5 | 1.4             | 14.5             | 111.7 | 2.4             | 20.0             | 107.2 |
| 2008–2012       | 2.6             | 34.8             | 106.9 | 3.2             | 39.1             | 98.9  | 0.8             | 13.5             | 94.3  | 1.4             | 16.0             | 89.9  |
|                 | 35–44           |                  |       | >74 y/o         |                  |       | 35–44           |                  |       | >74 y/o         |                  |       |
| 1983–1987       | 5.6             | 42.5             | 133.5 | 2.4             | 81.6             | 104.2 | 0.6             | 9.2              | 77.9  | 3.0             | 61.1             | 105.9 |
| 1988–1992       | 2.6             | 22.9             | 96.4  | 3.4             | 85.4             | 132.4 | 0.8             | 8.6              | 89.0  | 2.2             | 38.0             | 79.4  |
| 1993–1997       | 2.8             | 25.7             | 104.6 | 3.0             | 66.6             | 127.9 | 0.8             | 8.0              | 94.4  | 1.6             | 24.3             | 70.5  |
| 1998–2002       | 4.0             | 40.0             | 113.7 | 2.8             | 55.5             | 105.2 | 1.6             | 12.6             | 121.8 | 3.0             | 31.1             | 100.1 |
| 2003–2007       | 4.6             | 49.9             | 124.4 | 3.2             | 47.4             | 105.3 | 1.2             | 13.0             | 102.9 | 3.4             | 26.6             | 118.7 |
| 2008–2012       | 3.0             | 37.7             | 101.2 | 4.2             | 48.1             | 115.9 | 1.2             | 13.9             | 102.6 | 2.2             | 16.6             | 86.1  |

Secondary Medical Zone ID: 315

|           | Male            |                  |       |                 |                  |       | Female          |                  |       |                 |                  |       |
|-----------|-----------------|------------------|-------|-----------------|------------------|-------|-----------------|------------------|-------|-----------------|------------------|-------|
|           | Suicide         |                  |       | Suicide         |                  |       | Suicide         |                  |       | Suicide         |                  |       |
|           | Num<br>per year | Rate<br>/100,000 | × 100 | Num<br>per year | Rate<br>/100,000 | × 100 | Num<br>per year | Rate<br>/100,000 | × 100 | Num<br>per year | Rate<br>/100,000 | × 100 |
|           |                 |                  |       |                 |                  |       |                 |                  |       |                 |                  |       |
|           | Total (>10 y/o) |                  |       | 45–54           |                  |       | Total (>10 y/o) |                  |       | 45–54           |                  |       |
| 1983–1987 | 9.0             | 32.0             | 98.0  | 1.0             | 37.6             | 74.4  | 10.6            | 18.6             | 147.8 | 1.4             | 20.0             | 116.3 |
| 1988–1992 | 10.4            | 27.3             | 129.1 | 2.0             | 40.1             | 116.8 | 8.0             | 14.5             | 130.1 | 0.8             | 15.2             | 104.1 |
| 1993–1997 | 9.8             | 27.0             | 121.8 | 2.6             | 44.7             | 122.3 | 4.6             | 11.0             | 101.9 | 0.6             | 13.1             | 101.3 |
| 1998–2002 | 10.2            | 35.8             | 100.2 | 3.2             | 62.9             | 112.4 | 4.2             | 12.1             | 93.3  | 0.2             | 13.1             | 87.3  |
| 2003–2007 | 12.2            | 38.8             | 118.7 | 2.6             | 61.0             | 109.1 | 5.0             | 12.6             | 106.8 | 0.6             | 13.9             | 101.6 |
| 2008–2012 | 9.6             | 34.9             | 108.0 | 1.8             | 51.6             | 106.2 | 3.0             | 12.8             | 91.9  | 0.2             | 13.4             | 89.9  |
|           | 15–24           |                  |       | 55–64           |                  |       | 15–24           |                  |       | 55–64           |                  |       |
| 1983–1987 | 0.8             | 16.6             | 119.2 | 1.4             | 39.2             | 92.2  | 0.2             | 6.6              | 96.8  | 1.8             | 24.3             | 123.3 |
| 1988–1992 | 0.2             | 9.5              | 96.1  | 2.6             | 45.6             | 128.4 | 0.4             | 6.2              | 117.4 | 2.0             | 23.5             | 131.7 |
| 1993–1997 | 0.2             | 10.8             | 95.6  | 2.2             | 45.1             | 112.1 | 0.0             | 4.6              | 88.3  | 0.4             | 13.7             | 86.5  |
| 1998–2002 | 0.0             | 13.6             | 85.8  | 2.8             | 67.6             | 106.5 | 0.0             | 6.3              | 89.7  | 1.4             | 21.5             | 114.3 |
| 2003–2007 | 0.4             | 17.6             | 100.6 | 2.0             | 55.1             | 95.5  | 0.2             | 9.0              | 100.5 | 1.0             | 17.9             | 107.1 |
| 2008–2012 | 0.8             | 24.1             | 113.6 | 2.4             | 51.2             | 105.4 | 0.4             | 11.1             | 114.9 | 0.4             | 13.9             | 93.4  |
|           | 25–34           |                  |       | 65–74           |                  |       | 25–34           |                  |       | 65–74           |                  |       |
| 1983–1987 | 1.6             | 29.8             | 116.5 | 1.2             | 44.3             | 101.2 | 0.8             | 12.4             | 114.9 | 3.4             | 55.5             | 177.6 |
| 1988–1992 | 0.8             | 20.6             | 107.6 | 1.6             | 42.0             | 119.2 | 0.4             | 9.0              | 104.2 | 1.4             | 28.6             | 109.7 |
| 1993–1997 | 0.8             | 21.5             | 109.9 | 1.0             | 30.6             | 95.8  | 0.0             | 7.2              | 86.6  | 1.0             | 19.9             | 102.1 |
| 1998–2002 | 0.8             | 27.6             | 102.1 | 1.2             | 40.6             | 89.3  | 0.2             | 11.1             | 95.5  | 0.8             | 19.4             | 92.2  |
| 2003–2007 | 1.4             | 36.6             | 118.1 | 3.6             | 64.0             | 149.1 | 0.0             | 11.4             | 87.9  | 0.8             | 18.3             | 98.2  |
| 2008–2012 | 0.2             | 29.2             | 89.8  | 1.8             | 43.4             | 109.9 | 0.6             | 15.9             | 111.0 | 0.2             | 15.1             | 84.7  |
|           | 35–44           |                  |       | >74 y/o         |                  |       | 35–44           |                  |       | >74 y/o         |                  |       |
| 1983–1987 | 1.2             | 30.6             | 96.1  | 1.8             | 91.8             | 117.3 | 1.0             | 13.8             | 117.1 | 2.0             | 72.4             | 125.4 |
| 1988–1992 | 1.0             | 23.3             | 98.2  | 2.2             | 86.4             | 134.0 | 1.4             | 13.3             | 137.4 | 1.6             | 48.7             | 101.7 |
| 1993–1997 | 0.8             | 22.8             | 93.1  | 2.2             | 74.5             | 143.1 | 1.4             | 13.3             | 156.8 | 1.2             | 31.5             | 91.7  |
| 1998–2002 | 0.6             | 29.6             | 84.0  | 1.6             | 56.9             | 108.0 | 0.0             | 8.6              | 83.0  | 1.6             | 32.1             | 103.2 |
| 2003–2007 | 1.4             | 44.0             | 109.8 | 0.8             | 36.2             | 80.5  | 0.2             | 11.9             | 94.0  | 2.2             | 31.4             | 140.0 |
| 2008–2012 | 0.4             | 33.5             | 90.1  | 2.2             | 50.3             | 121.1 | 0.0             | 12.1             | 89.1  | 1.2             | 18.9             | 98.1  |

Secondary Medical Zone ID: 316

|                 | Male            |                  |       |                 |                  |       | Female          |                  |       |                 |                  |       |
|-----------------|-----------------|------------------|-------|-----------------|------------------|-------|-----------------|------------------|-------|-----------------|------------------|-------|
|                 | Suicide         |                  |       | Suicide         |                  |       | Suicide         |                  |       | Suicide         |                  |       |
|                 | Num<br>per year | Rate<br>/100,000 | × 100 | Num<br>per year | Rate<br>/100,000 | × 100 | Num<br>per year | Rate<br>/100,000 | × 100 | Num<br>per year | Rate<br>/100,000 | × 100 |
|                 |                 |                  |       |                 |                  |       |                 |                  |       |                 |                  |       |
| Total (>10 y/o) | 45–54           | Total (>10 y/o)  | 45–54 |                 |                  |       |                 |                  |       |                 |                  |       |
| 1983–1987       | 19.2            | 36.1             | 120.3 | 5.6             | 65.4             | 129.2 | 14.6            | 18.5             | 139.6 | 2.0             | 19.3             | 112.3 |
| 1988–1992       | 21.4            | 32.5             | 161.6 | 4.8             | 54.0             | 157.3 | 10.2            | 13.6             | 114.3 | 0.4             | 12.0             | 82.0  |
| 1993–1997       | 21.2            | 31.0             | 154.7 | 3.8             | 44.2             | 120.8 | 7.0             | 10.6             | 97.5  | 1.4             | 14.6             | 113.0 |
| 1998–2002       | 24.4            | 40.7             | 130.7 | 7.2             | 76.0             | 135.9 | 11.6            | 13.8             | 124.8 | 1.2             | 15.2             | 100.8 |
| 2003–2007       | 26.0            | 44.9             | 142.6 | 7.8             | 90.5             | 161.9 | 7.6             | 12.4             | 100.8 | 1.2             | 14.5             | 106.1 |
| 2008–2012       | 22.8            | 38.9             | 135.0 | 5.0             | 65.1             | 134.0 | 8.2             | 13.2             | 108.1 | 1.2             | 16.2             | 108.6 |
|                 | 15–24           |                  |       | 55–64           |                  |       | 15–24           |                  |       | 55–64           |                  |       |
| 1983–1987       | 0.4             | 11.5             | 82.7  | 3.4             | 45.6             | 107.2 | 0.8             | 8.2              | 120.7 | 2.2             | 22.1             | 111.9 |
| 1988–1992       | 0.8             | 11.0             | 111.5 | 3.8             | 43.6             | 122.7 | 0.4             | 5.7              | 108.5 | 1.8             | 18.7             | 104.8 |
| 1993–1997       | 0.4             | 10.6             | 93.8  | 5.2             | 57.5             | 142.7 | 0.0             | 4.2              | 81.2  | 2.0             | 19.1             | 120.2 |
| 1998–2002       | 0.2             | 13.0             | 82.4  | 2.8             | 54.4             | 85.7  | 0.6             | 8.0              | 114.3 | 2.2             | 22.1             | 117.5 |
| 2003–2007       | 0.6             | 16.7             | 96.0  | 5.2             | 68.6             | 118.8 | 0.2             | 8.1              | 90.0  | 1.0             | 15.9             | 95.0  |
| 2008–2012       | 0.6             | 20.6             | 97.3  | 5.0             | 56.0             | 115.2 | 0.2             | 9.0              | 93.1  | 2.0             | 17.8             | 119.2 |
|                 | 25–34           |                  |       | 65–74           |                  |       | 25–34           |                  |       | 65–74           |                  |       |
| 1983–1987       | 2.0             | 26.0             | 101.6 | 3.0             | 58.7             | 134.1 | 0.8             | 10.6             | 98.0  | 3.8             | 49.0             | 156.8 |
| 1988–1992       | 1.8             | 23.6             | 123.3 | 2.6             | 44.3             | 125.6 | 0.6             | 8.8              | 101.4 | 3.6             | 40.6             | 155.5 |
| 1993–1997       | 1.0             | 19.6             | 100.3 | 4.2             | 52.3             | 163.9 | 0.2             | 7.3              | 87.4  | 2.2             | 23.7             | 121.5 |
| 1998–2002       | 2.0             | 31.4             | 116.4 | 6.2             | 69.5             | 152.9 | 0.8             | 12.5             | 107.5 | 3.4             | 30.3             | 144.1 |
| 2003–2007       | 2.0             | 35.2             | 113.5 | 3.4             | 49.1             | 114.3 | 0.0             | 10.2             | 78.6  | 2.0             | 21.2             | 114.0 |
| 2008–2012       | 2.6             | 40.4             | 124.1 | 2.4             | 41.5             | 104.9 | 0.6             | 14.3             | 100.1 | 0.8             | 15.8             | 88.9  |
|                 | 35–44           |                  |       | >74 y/o         |                  |       | 35–44           |                  |       | >74 y/o         |                  |       |
| 1983–1987       | 2.8             | 34.8             | 109.3 | 2.0             | 85.0             | 108.5 | 1.4             | 13.7             | 116.1 | 3.6             | 89.5             | 155.1 |
| 1988–1992       | 3.8             | 35.2             | 148.3 | 3.6             | 102.8            | 159.3 | 0.8             | 9.8              | 101.2 | 2.6             | 52.8             | 110.4 |
| 1993–1997       | 2.8             | 31.4             | 128.3 | 3.8             | 89.8             | 172.4 | 0.6             | 8.4              | 98.8  | 0.6             | 17.0             | 49.3  |
| 1998–2002       | 3.2             | 43.2             | 122.7 | 2.8             | 62.4             | 118.4 | 0.4             | 9.2              | 89.4  | 3.0             | 36.9             | 118.8 |
| 2003–2007       | 3.2             | 51.2             | 127.7 | 3.8             | 60.9             | 135.3 | 0.8             | 13.1             | 103.8 | 2.4             | 24.5             | 109.0 |
| 2008–2012       | 1.4             | 35.2             | 94.6  | 5.8             | 70.9             | 170.8 | 0.8             | 14.1             | 104.2 | 2.6             | 22.0             | 114.4 |

Secondary Medical Zone ID: 317

|                 | Male            |                  |       |                 |                  |       | Female          |                  |       |                 |                  |       |
|-----------------|-----------------|------------------|-------|-----------------|------------------|-------|-----------------|------------------|-------|-----------------|------------------|-------|
|                 | Suicide         |                  |       | Suicide         |                  |       | Suicide         |                  |       | Suicide         |                  |       |
|                 | Num<br>per year | Rate<br>/100,000 | × 100 | Num<br>per year | Rate<br>/100,000 | × 100 | Num<br>per year | Rate<br>/100,000 | × 100 | Num<br>per year | Rate<br>/100,000 | × 100 |
|                 |                 |                  |       |                 |                  |       |                 |                  |       |                 |                  |       |
| Total (>10 y/o) | 45–54           | Total (>10 y/o)  | 45–54 |                 |                  |       |                 |                  |       |                 |                  |       |
| 1983–1987       | 20.0            | 31.1             | 90.5  | 5.0             | 49.3             | 97.4  | 12.6            | 14.5             | 90.4  | 1.8             | 16.3             | 94.5  |
| 1988–1992       | 18.6            | 25.2             | 104.9 | 2.6             | 31.1             | 90.4  | 8.6             | 10.6             | 73.3  | 0.4             | 10.9             | 74.8  |
| 1993–1997       | 19.2            | 26.3             | 106.5 | 3.4             | 35.7             | 97.4  | 9.4             | 10.4             | 89.0  | 2.2             | 16.0             | 124.0 |
| 1998–2002       | 25.2            | 36.7             | 100.8 | 5.6             | 53.5             | 95.6  | 12.2            | 12.8             | 100.3 | 1.4             | 14.5             | 96.1  |
| 2003–2007       | 27.2            | 39.6             | 112.4 | 8.4             | 75.9             | 135.7 | 10.4            | 11.9             | 98.7  | 2.0             | 16.0             | 116.5 |
| 2008–2012       | 25.8            | 38.6             | 118.3 | 7.2             | 69.4             | 142.8 | 9.8             | 12.7             | 100.9 | 1.0             | 13.9             | 93.0  |
|                 | 15–24           |                  |       | 55–64           |                  |       | 15–24           |                  |       | 55–64           |                  |       |
| 1983–1987       | 1.4             | 15.8             | 113.1 | 2.4             | 30.8             | 72.4  | 0.6             | 7.0              | 102.5 | 1.8             | 16.7             | 84.5  |
| 1988–1992       | 0.2             | 8.2              | 82.6  | 5.8             | 46.8             | 131.9 | 0.0             | 4.0              | 75.0  | 1.4             | 14.4             | 80.7  |
| 1993–1997       | 0.6             | 10.8             | 95.2  | 3.8             | 39.3             | 97.7  | 0.6             | 6.1              | 117.3 | 1.2             | 13.1             | 82.7  |
| 1998–2002       | 1.2             | 16.9             | 107.1 | 6.0             | 66.6             | 104.8 | 0.0             | 5.5              | 78.3  | 3.6             | 25.0             | 133.1 |
| 2003–2007       | 0.8             | 17.2             | 98.4  | 6.8             | 66.9             | 115.9 | 0.0             | 6.8              | 75.1  | 1.8             | 17.2             | 102.5 |
| 2008–2012       | 0.8             | 21.1             | 99.7  | 6.2             | 54.1             | 111.3 | 0.4             | 9.8              | 101.0 | 1.4             | 14.4             | 96.5  |
|                 | 25–34           |                  |       | 65–74           |                  |       | 25–34           |                  |       | 65–74           |                  |       |
| 1983–1987       | 2.4             | 23.8             | 93.3  | 3.4             | 49.6             | 113.4 | 2.4             | 15.4             | 143.0 | 2.8             | 30.6             | 97.8  |
| 1988–1992       | 2.6             | 24.6             | 128.5 | 1.8             | 29.2             | 82.9  | 0.6             | 7.9              | 91.0  | 2.0             | 21.0             | 80.6  |
| 1993–1997       | 1.8             | 21.7             | 111.3 | 3.6             | 37.5             | 117.6 | 0.6             | 8.1              | 97.3  | 2.6             | 20.7             | 106.2 |
| 1998–2002       | 2.0             | 28.2             | 104.6 | 3.6             | 40.7             | 89.5  | 0.8             | 11.5             | 99.6  | 2.2             | 19.2             | 91.4  |
| 2003–2007       | 1.4             | 28.1             | 90.6  | 2.8             | 36.2             | 84.4  | 0.4             | 11.3             | 87.1  | 1.8             | 17.4             | 93.3  |
| 2008–2012       | 3.0             | 40.5             | 124.3 | 2.4             | 35.1             | 88.8  | 0.6             | 13.8             | 96.1  | 2.6             | 21.4             | 120.0 |
|                 | 35–44           |                  |       | >74 y/o         |                  |       | 35–44           |                  |       | >74 y/o         |                  |       |
| 1983–1987       | 3.8             | 35.2             | 110.5 | 1.6             | 51.1             | 65.3  | 0.4             | 9.0              | 76.4  | 2.8             | 44.8             | 77.6  |
| 1988–1992       | 3.0             | 25.6             | 108.2 | 2.6             | 58.2             | 90.2  | 0.6             | 8.3              | 85.9  | 3.6             | 42.5             | 88.7  |
| 1993–1997       | 3.6             | 30.5             | 124.3 | 2.2             | 45.3             | 87.0  | 0.6             | 7.5              | 88.1  | 1.6             | 19.1             | 55.4  |
| 1998–2002       | 4.0             | 41.2             | 116.9 | 2.8             | 47.7             | 90.6  | 1.2             | 11.4             | 110.3 | 3.0             | 25.3             | 81.5  |
| 2003–2007       | 3.4             | 44.9             | 112.0 | 3.6             | 46.4             | 103.1 | 0.2             | 9.7              | 77.2  | 4.2             | 27.2             | 121.4 |
| 2008–2012       | 2.0             | 35.6             | 95.6  | 4.2             | 45.4             | 109.5 | 0.4             | 11.8             | 86.8  | 3.4             | 20.4             | 106.3 |

Secondary Medical Zone ID: 318

|                 | Male            |                  |       |                 |                  |       | Female          |                  |       |                 |                  |       |
|-----------------|-----------------|------------------|-------|-----------------|------------------|-------|-----------------|------------------|-------|-----------------|------------------|-------|
|                 | Suicide         |                  |       | Suicide         |                  |       | Suicide         |                  |       | Suicide         |                  |       |
|                 | Num<br>per year | Rate<br>/100,000 | × 100 | Num<br>per year | Rate<br>/100,000 | × 100 | Num<br>per year | Rate<br>/100,000 | × 100 | Num<br>per year | Rate<br>/100,000 | × 100 |
|                 |                 |                  |       |                 |                  |       |                 |                  |       |                 |                  |       |
| Total (>10 y/o) | 45–54           | Total (>10 y/o)  | 45–54 |                 |                  |       |                 |                  |       |                 |                  |       |
| 1983–1987       | 32.0            | 33.7             | 103.8 | 8.2             | 54.7             | 108.1 | 19.0            | 15.0             | 97.9  | 3.2             | 17.7             | 102.6 |
| 1988–1992       | 25.0            | 24.8             | 100.8 | 4.2             | 31.3             | 91.2  | 15.2            | 11.9             | 86.3  | 3.2             | 16.6             | 113.2 |
| 1993–1997       | 23.2            | 23.9             | 91.6  | 5.0             | 34.2             | 93.6  | 12.4            | 9.6              | 82.8  | 2.0             | 12.1             | 94.0  |
| 1998–2002       | 42.0            | 38.5             | 111.2 | 9.6             | 60.9             | 108.9 | 18.0            | 12.7             | 99.7  | 3.6             | 18.0             | 119.3 |
| 2003–2007       | 39.0            | 37.6             | 104.6 | 7.0             | 53.4             | 95.5  | 20.8            | 14.3             | 118.1 | 3.4             | 18.1             | 132.0 |
| 2008–2012       | 35.6            | 35.1             | 103.9 | 7.2             | 56.5             | 116.3 | 14.2            | 12.8             | 92.5  | 1.6             | 13.9             | 93.3  |
|                 | 15–24           |                  |       | 55–64           |                  |       | 15–24           |                  |       | 55–64           |                  |       |
| 1983–1987       | 1.0             | 10.8             | 77.6  | 5.2             | 39.9             | 93.8  | 1.8             | 9.2              | 134.0 | 4.4             | 22.7             | 115.2 |
| 1988–1992       | 1.0             | 9.1              | 91.7  | 6.2             | 39.6             | 111.7 | 0.2             | 3.7              | 69.7  | 2.8             | 16.3             | 91.4  |
| 1993–1997       | 1.4             | 11.2             | 98.9  | 5.0             | 36.6             | 91.0  | 0.6             | 4.8              | 92.7  | 2.2             | 13.9             | 87.2  |
| 1998–2002       | 3.0             | 19.8             | 125.0 | 10.0            | 69.4             | 109.2 | 0.2             | 5.0              | 71.8  | 3.6             | 19.9             | 105.7 |
| 2003–2007       | 2.4             | 18.8             | 108.0 | 9.6             | 61.8             | 107.0 | 1.4             | 10.4             | 115.7 | 4.2             | 19.9             | 118.9 |
| 2008–2012       | 2.4             | 22.4             | 105.5 | 7.0             | 46.4             | 95.5  | 1.4             | 11.5             | 118.1 | 1.6             | 12.3             | 82.7  |
|                 | 25–34           |                  |       | 65–74           |                  |       | 25–34           |                  |       | 65–74           |                  |       |
| 1983–1987       | 4.0             | 29.0             | 113.6 | 3.2             | 39.8             | 91.0  | 1.0             | 8.9              | 82.9  | 2.4             | 23.6             | 75.4  |
| 1988–1992       | 2.6             | 21.2             | 111.0 | 3.0             | 32.2             | 91.4  | 1.8             | 10.8             | 125.1 | 1.6             | 15.1             | 57.8  |
| 1993–1997       | 2.0             | 18.8             | 96.4  | 4.0             | 32.9             | 103.2 | 1.4             | 9.4              | 113.1 | 1.4             | 11.7             | 60.0  |
| 1998–2002       | 3.2             | 27.1             | 100.2 | 6.8             | 49.1             | 107.9 | 1.6             | 11.9             | 102.3 | 3.2             | 19.4             | 92.2  |
| 2003–2007       | 3.2             | 28.3             | 91.2  | 7.2             | 51.1             | 119.1 | 1.8             | 13.5             | 103.8 | 2.8             | 17.4             | 93.7  |
| 2008–2012       | 3.6             | 32.4             | 99.5  | 4.8             | 38.2             | 96.8  | 1.8             | 15.1             | 105.1 | 2.0             | 14.9             | 84.0  |
|                 | 35–44           |                  |       | >74 y/o         |                  |       | 35–44           |                  |       | >74 y/o         |                  |       |
| 1983–1987       | 7.6             | 43.3             | 136.1 | 2.8             | 61.9             | 79.0  | 2.6             | 13.1             | 111.0 | 3.6             | 48.3             | 83.7  |
| 1988–1992       | 4.4             | 26.9             | 113.3 | 3.6             | 59.6             | 92.3  | 2.2             | 11.1             | 115.4 | 3.2             | 33.0             | 68.9  |
| 1993–1997       | 3.6             | 25.9             | 105.7 | 2.2             | 36.7             | 70.5  | 0.8             | 7.2              | 84.5  | 4.0             | 32.0             | 92.9  |
| 1998–2002       | 4.8             | 38.3             | 108.7 | 4.4             | 52.3             | 99.2  | 1.4             | 10.6             | 102.3 | 4.4             | 28.3             | 91.2  |
| 2003–2007       | 6.0             | 48.6             | 121.4 | 3.6             | 36.5             | 81.1  | 2.6             | 16.0             | 126.5 | 4.6             | 23.8             | 105.9 |
| 2008–2012       | 4.4             | 36.8             | 98.9  | 6.2             | 47.1             | 113.5 | 2.0             | 14.4             | 105.9 | 3.8             | 17.7             | 92.2  |

Secondary Medical Zone ID: 319

|           | Male            |                  |       |                 |                  |       | Female          |                  |       |                 |                  |       |
|-----------|-----------------|------------------|-------|-----------------|------------------|-------|-----------------|------------------|-------|-----------------|------------------|-------|
|           | Suicide         |                  |       | Suicide         |                  |       | Suicide         |                  |       | Suicide         |                  |       |
|           | Num<br>per year | Rate<br>/100,000 | × 100 | Num<br>per year | Rate<br>/100,000 | × 100 | Num<br>per year | Rate<br>/100,000 | × 100 | Num<br>per year | Rate<br>/100,000 | × 100 |
|           |                 |                  |       |                 |                  |       |                 |                  |       |                 |                  |       |
|           | Total (>10 y/o) |                  |       | 45–54           |                  |       | Total (>10 y/o) |                  |       | 45–54           |                  |       |
| 1983–1987 | 64.0            | 32.4             | 98.6  | 16.6            | 53.0             | 104.8 | 34.4            | 14.9             | 98.1  | 6.6             | 18.9             | 109.5 |
| 1988–1992 | 53.2            | 24.1             | 98.4  | 11.6            | 33.8             | 98.6  | 29.2            | 11.5             | 87.9  | 4.4             | 12.9             | 88.5  |
| 1993–1997 | 53.4            | 23.0             | 89.3  | 14.2            | 34.9             | 95.5  | 25.0            | 9.4              | 82.0  | 5.4             | 12.7             | 98.4  |
| 1998–2002 | 86.0            | 34.4             | 94.0  | 26.2            | 60.0             | 107.3 | 30.2            | 10.9             | 81.0  | 6.8             | 15.0             | 99.7  |
| 2003–2007 | 90.2            | 35.4             | 95.5  | 22.4            | 58.5             | 104.6 | 28.8            | 10.6             | 78.7  | 5.8             | 14.0             | 101.9 |
| 2008–2012 | 85.2            | 33.9             | 95.7  | 15.2            | 46.3             | 95.2  | 34.8            | 12.4             | 91.6  | 5.4             | 14.8             | 99.3  |
|           | 15–24           |                  |       | 55–64           |                  |       | 15–24           |                  |       | 55–64           |                  |       |
| 1983–1987 | 4.4             | 13.3             | 95.1  | 8.8             | 38.1             | 89.8  | 1.8             | 5.8              | 85.3  | 6.8             | 22.9             | 116.3 |
| 1988–1992 | 2.4             | 7.4              | 74.8  | 11.4            | 39.2             | 110.4 | 0.8             | 3.3              | 62.1  | 5.8             | 18.1             | 101.5 |
| 1993–1997 | 5.0             | 11.7             | 103.5 | 9.8             | 34.0             | 84.5  | 1.6             | 4.5              | 86.8  | 6.2             | 17.8             | 112.1 |
| 1998–2002 | 5.4             | 14.9             | 94.4  | 17.8            | 55.3             | 87.0  | 1.8             | 5.9              | 83.8  | 4.8             | 15.1             | 80.1  |
| 2003–2007 | 5.0             | 16.4             | 94.1  | 21.0            | 53.7             | 93.1  | 0.8             | 4.7              | 52.6  | 4.2             | 12.1             | 72.4  |
| 2008–2012 | 7.2             | 24.2             | 114.3 | 21.2            | 49.7             | 102.3 | 2.4             | 9.2              | 95.2  | 8.0             | 16.8             | 112.3 |
|           | 25–34           |                  |       | 65–74           |                  |       | 25–34           |                  |       | 65–74           |                  |       |
| 1983–1987 | 10.2            | 27.3             | 107.0 | 5.0             | 39.1             | 89.4  | 4.0             | 10.1             | 93.8  | 4.0             | 24.4             | 77.9  |
| 1988–1992 | 3.8             | 13.3             | 69.4  | 5.2             | 32.6             | 92.5  | 2.2             | 6.9              | 79.7  | 6.6             | 29.3             | 112.4 |
| 1993–1997 | 5.2             | 17.0             | 87.0  | 3.4             | 19.3             | 60.6  | 2.4             | 7.3              | 87.6  | 3.4             | 14.2             | 72.7  |
| 1998–2002 | 10.2            | 28.5             | 105.5 | 10.6            | 42.8             | 94.1  | 4.8             | 12.3             | 106.0 | 4.2             | 15.6             | 74.2  |
| 2003–2007 | 9.4             | 26.6             | 85.7  | 9.0             | 35.0             | 81.5  | 4.0             | 11.3             | 86.7  | 4.4             | 15.1             | 80.9  |
| 2008–2012 | 11.0            | 32.4             | 99.5  | 10.0            | 35.3             | 89.3  | 5.6             | 15.5             | 108.5 | 5.2             | 16.1             | 90.6  |
|           | 35–44           |                  |       | >74 y/o         |                  |       | 35–44           |                  |       | >74 y/o         |                  |       |
| 1983–1987 | 12.4            | 29.7             | 93.4  | 6.6             | 88.1             | 112.5 | 5.4             | 12.2             | 102.9 | 5.6             | 53.1             | 92.1  |
| 1988–1992 | 12.2            | 27.3             | 115.3 | 6.4             | 67.5             | 104.7 | 4.4             | 9.6              | 99.8  | 5.0             | 34.0             | 71.0  |
| 1993–1997 | 9.6             | 24.7             | 100.9 | 6.2             | 54.1             | 103.9 | 2.8             | 7.3              | 85.4  | 3.2             | 18.3             | 53.2  |
| 1998–2002 | 11.6            | 33.9             | 96.4  | 4.2             | 33.5             | 63.6  | 2.6             | 8.0              | 77.5  | 5.2             | 21.7             | 70.0  |
| 2003–2007 | 15.4            | 45.4             | 113.2 | 8.0             | 42.9             | 95.3  | 4.0             | 11.5             | 91.4  | 5.4             | 17.4             | 77.7  |
| 2008–2012 | 13.4            | 36.3             | 97.5  | 6.8             | 31.1             | 75.1  | 3.4             | 10.4             | 77.0  | 4.8             | 13.3             | 69.4  |



Secondary Medical Zone ID: 320

|                 | Male            |                  |       |                 |                  |       | Female          |                  |       |                 |                  |       |
|-----------------|-----------------|------------------|-------|-----------------|------------------|-------|-----------------|------------------|-------|-----------------|------------------|-------|
|                 | Suicide         |                  |       | Suicide         |                  |       | Suicide         |                  |       | Suicide         |                  |       |
|                 | Num<br>per year | Rate<br>/100,000 | × 100 | Num<br>per year | Rate<br>/100,000 | × 100 | Num<br>per year | Rate<br>/100,000 | × 100 | Num<br>per year | Rate<br>/100,000 | × 100 |
|                 |                 |                  |       |                 |                  |       |                 |                  |       |                 |                  |       |
| Total (>10 y/o) | 45–54           | Total (>10 y/o)  | 45–54 |                 |                  |       |                 |                  |       |                 |                  |       |
| 1983–1987       | 14.8            | 34.9             | 112.3 | 3.0             | 48.8             | 96.5  | 6.4             | 14.2             | 87.9  | 0.4             | 13.3             | 77.2  |
| 1988–1992       | 12.6            | 27.0             | 120.1 | 2.4             | 37.7             | 109.7 | 7.4             | 12.8             | 102.7 | 0.6             | 13.1             | 89.8  |
| 1993–1997       | 10.4            | 25.2             | 101.7 | 2.6             | 38.8             | 105.9 | 5.4             | 10.2             | 93.2  | 0.4             | 11.0             | 85.4  |
| 1998–2002       | 20.2            | 41.5             | 129.3 | 6.4             | 78.3             | 139.8 | 6.6             | 12.3             | 97.8  | 1.4             | 16.5             | 109.6 |
| 2003–2007       | 20.4            | 43.2             | 136.3 | 5.4             | 80.1             | 143.2 | 7.8             | 12.8             | 113.2 | 0.8             | 13.7             | 99.9  |
| 2008–2012       | 14.6            | 35.9             | 111.3 | 1.6             | 43.6             | 89.8  | 6.6             | 13.2             | 105.6 | 0.4             | 13.4             | 89.7  |
|                 | 15–24           |                  |       | 55–64           |                  |       | 15–24           |                  |       | 55–64           |                  |       |
| 1983–1987       | 1.6             | 20.6             | 147.6 | 3.0             | 48.0             | 113.0 | 0.0             | 5.4              | 79.4  | 1.2             | 19.0             | 96.2  |
| 1988–1992       | 0.4             | 9.8              | 98.8  | 3.6             | 46.7             | 131.5 | 0.0             | 4.3              | 81.0  | 2.0             | 21.3             | 119.1 |
| 1993–1997       | 0.0             | 9.3              | 82.1  | 2.0             | 37.3             | 92.8  | 0.4             | 5.8              | 111.3 | 0.4             | 12.2             | 76.9  |
| 1998–2002       | 0.6             | 15.8             | 100.1 | 4.2             | 69.7             | 109.6 | 0.0             | 6.0              | 84.9  | 1.4             | 19.5             | 103.4 |
| 2003–2007       | 0.8             | 18.8             | 108.0 | 5.4             | 74.7             | 129.5 | 0.4             | 9.7              | 107.5 | 1.4             | 17.7             | 105.8 |
| 2008–2012       | 0.6             | 21.5             | 101.2 | 3.6             | 52.0             | 107.0 | 0.2             | 9.4              | 97.0  | 1.0             | 14.8             | 99.5  |
|                 | 25–34           |                  |       | 65–74           |                  |       | 25–34           |                  |       | 65–74           |                  |       |
| 1983–1987       | 2.0             | 29.0             | 113.5 | 1.2             | 41.1             | 93.8  | 0.8             | 11.3             | 105.1 | 2.0             | 36.2             | 115.8 |
| 1988–1992       | 1.0             | 20.0             | 104.7 | 1.6             | 38.4             | 109.0 | 0.8             | 10.1             | 116.3 | 1.0             | 22.2             | 84.9  |
| 1993–1997       | 1.0             | 21.1             | 108.0 | 1.6             | 32.9             | 103.0 | 0.2             | 7.6              | 90.9  | 2.0             | 25.3             | 129.9 |
| 1998–2002       | 1.6             | 30.4             | 112.6 | 2.2             | 43.4             | 95.4  | 0.0             | 9.5              | 81.9  | 2.0             | 24.6             | 116.9 |
| 2003–2007       | 1.2             | 30.9             | 99.7  | 2.6             | 46.1             | 107.5 | 0.0             | 10.5             | 80.8  | 1.8             | 21.7             | 116.5 |
| 2008–2012       | 2.0             | 38.2             | 117.3 | 1.6             | 36.7             | 93.0  | 0.4             | 13.9             | 96.9  | 2.2             | 22.8             | 127.9 |
|                 | 35–44           |                  |       | >74 y/o         |                  |       | 35–44           |                  |       | >74 y/o         |                  |       |
| 1983–1987       | 2.6             | 35.4             | 111.2 | 1.4             | 75.0             | 95.8  | 0.6             | 10.8             | 91.6  | 1.4             | 47.9             | 83.0  |
| 1988–1992       | 2.6             | 30.5             | 128.8 | 1.0             | 53.4             | 82.8  | 0.6             | 9.4              | 97.4  | 2.4             | 54.9             | 114.8 |
| 1993–1997       | 1.6             | 26.0             | 105.9 | 1.6             | 57.2             | 109.9 | 0.0             | 6.3              | 74.2  | 2.0             | 38.4             | 111.5 |
| 1998–2002       | 2.8             | 45.4             | 128.9 | 2.2             | 61.8             | 117.1 | 0.4             | 9.8              | 94.4  | 1.4             | 26.0             | 83.7  |
| 2003–2007       | 2.6             | 51.0             | 127.2 | 2.4             | 52.8             | 117.3 | 0.6             | 12.8             | 101.3 | 2.8             | 32.7             | 145.7 |
| 2008–2012       | 2.8             | 45.7             | 122.8 | 2.4             | 45.4             | 109.4 | 1.0             | 15.3             | 113.0 | 1.4             | 17.5             | 90.9  |

Secondary Medical Zone ID: 321

|           | Male               |                  |       |                    |                  |       | Female             |                  |       |                    |                  |       |
|-----------|--------------------|------------------|-------|--------------------|------------------|-------|--------------------|------------------|-------|--------------------|------------------|-------|
|           | Suicide            |                  |       | Suicide            |                  |       | Suicide            |                  |       | Suicide            |                  |       |
|           | Num<br>per<br>year | Rate<br>/100,000 | × 100 | Num<br>per<br>year | Rate<br>/100,000 | × 100 | Num<br>per<br>year | Rate<br>/100,000 | × 100 | Num<br>per<br>year | Rate<br>/100,000 | × 100 |
|           |                    |                  |       |                    |                  |       |                    |                  |       |                    |                  |       |
|           | Total (>10 y/o)    |                  |       | 45–54              |                  |       | Total (>10 y/o)    |                  |       | 45–54              |                  |       |
| 1983–1987 | 21.2               | 40.9             | 152.4 | 4.6                | 65.2             | 129.0 | 11.4               | 17.6             | 131.7 | 2.0                | 20.9             | 121.3 |
| 1988–1992 | 13.8               | 28.0             | 131.7 | 2.4                | 41.2             | 120.1 | 10.8               | 14.9             | 136.9 | 1.4                | 16.9             | 115.5 |
| 1993–1997 | 14.2               | 28.8             | 134.7 | 2.6                | 42.5             | 116.1 | 6.8                | 11.2             | 111.1 | 0.8                | 13.4             | 104.1 |
| 1998–2002 | 15.8               | 37.5             | 115.6 | 4.4                | 69.3             | 123.8 | 7.8                | 13.1             | 113.1 | 0.8                | 15.2             | 101.2 |
| 2003–2007 | 17.2               | 41.1             | 130.7 | 2.8                | 59.8             | 106.9 | 6.2                | 12.9             | 106.3 | 1.4                | 17.2             | 125.3 |
| 2008–2012 | 14.6               | 36.4             | 122.6 | 2.0                | 51.7             | 106.4 | 5.8                | 13.5             | 106.1 | 0.4                | 14.2             | 95.1  |
|           | 15–24              |                  |       | 55–64              |                  |       | 15–24              |                  |       | 55–64              |                  |       |
| 1983–1987 | 0.6                | 14.5             | 103.8 | 5.0                | 61.0             | 143.5 | 0.2                | 6.6              | 96.8  | 1.6                | 20.2             | 102.4 |
| 1988–1992 | 0.6                | 10.9             | 110.4 | 4.4                | 51.6             | 145.3 | 0.0                | 4.6              | 86.3  | 1.8                | 19.9             | 111.3 |
| 1993–1997 | 1.0                | 13.8             | 122.4 | 3.8                | 52.3             | 129.9 | 0.2                | 5.3              | 101.9 | 1.8                | 19.7             | 123.8 |
| 1998–2002 | 1.2                | 19.4             | 122.8 | 3.4                | 68.1             | 107.2 | 0.4                | 7.8              | 110.9 | 1.0                | 18.5             | 98.4  |
| 2003–2007 | 1.4                | 22.7             | 129.9 | 3.4                | 63.4             | 109.8 | 0.0                | 7.7              | 85.9  | 0.4                | 14.8             | 88.3  |
| 2008–2012 | 0.4                | 20.7             | 97.7  | 4.2                | 59.5             | 122.4 | 0.2                | 9.7              | 100.2 | 0.8                | 15.0             | 100.4 |
|           | 25–34              |                  |       | 65–74              |                  |       | 25–34              |                  |       | 65–74              |                  |       |
| 1983–1987 | 3.4                | 43.0             | 168.2 | 1.8                | 44.7             | 102.2 | 0.2                | 9.3              | 86.5  | 3.2                | 46.4             | 148.4 |
| 1988–1992 | 0.4                | 17.0             | 88.8  | 2.8                | 47.5             | 134.9 | 0.8                | 10.9             | 125.6 | 2.6                | 35.2             | 135.0 |
| 1993–1997 | 1.2                | 24.5             | 125.5 | 1.6                | 30.7             | 96.1  | 0.2                | 8.1              | 97.5  | 1.4                | 19.8             | 101.5 |
| 1998–2002 | 0.2                | 23.1             | 85.6  | 3.2                | 50.1             | 110.2 | 0.4                | 11.9             | 102.7 | 1.8                | 22.9             | 108.9 |
| 2003–2007 | 1.4                | 35.2             | 113.5 | 2.4                | 44.9             | 104.7 | 0.2                | 12.2             | 93.8  | 1.4                | 19.8             | 106.1 |
| 2008–2012 | 0.4                | 29.6             | 91.0  | 2.4                | 45.6             | 115.5 | 1.2                | 18.6             | 130.0 | 1.4                | 19.9             | 111.7 |
|           | 35–44              |                  |       | >74 y/o            |                  |       | 35–44              |                  |       | >74 y/o            |                  |       |
| 1983–1987 | 2.6                | 40.2             | 126.2 | 3.2                | 108.9            | 139.0 | 1.0                | 13.4             | 113.3 | 3.2                | 84.6             | 146.7 |
| 1988–1992 | 2.0                | 29.4             | 124.1 | 1.2                | 52.4             | 81.2  | 0.8                | 10.8             | 111.9 | 3.4                | 68.8             | 143.8 |
| 1993–1997 | 1.2                | 25.5             | 103.9 | 2.8                | 71.5             | 137.3 | 0.2                | 7.7              | 90.5  | 2.2                | 39.4             | 114.4 |
| 1998–2002 | 0.4                | 26.9             | 76.4  | 3.0                | 66.1             | 125.5 | 0.2                | 9.5              | 91.5  | 3.2                | 42.9             | 138.0 |
| 2003–2007 | 2.2                | 53.2             | 132.8 | 3.6                | 60.8             | 134.9 | 0.6                | 13.6             | 108.0 | 2.2                | 25.5             | 113.7 |
| 2008–2012 | 1.4                | 40.0             | 107.6 | 3.8                | 55.0             | 132.6 | 0.2                | 12.8             | 94.6  | 1.6                | 18.0             | 93.4  |

Secondary Medical Zone ID: 322

|                 | Male            |                  |       |                 |                  |       | Female          |                  |       |                 |                  |       |
|-----------------|-----------------|------------------|-------|-----------------|------------------|-------|-----------------|------------------|-------|-----------------|------------------|-------|
|                 | Suicide         |                  |       | Suicide         |                  |       | Suicide         |                  |       | Suicide         |                  |       |
|                 | Num<br>per year | Rate<br>/100,000 | × 100 | Num<br>per year | Rate<br>/100,000 | × 100 | Num<br>per year | Rate<br>/100,000 | × 100 | Num<br>per year | Rate<br>/100,000 | × 100 |
|                 |                 |                  |       |                 |                  |       |                 |                  |       |                 |                  |       |
| Total (>10 y/o) | 45–54           | Total (>10 y/o)  | 45–54 |                 |                  |       |                 |                  |       |                 |                  |       |
| 1983–1987       | 19.4            | 35.1             | 116.7 | 4.6             | 55.9             | 110.6 | 6.0             | 13.1             | 73.9  | 0.4             | 12.4             | 72.0  |
| 1988–1992       | 14.4            | 26.1             | 111.3 | 2.4             | 34.0             | 99.0  | 7.0             | 11.8             | 86.9  | 1.2             | 14.8             | 101.2 |
| 1993–1997       | 18.0            | 28.7             | 129.9 | 3.6             | 41.4             | 113.1 | 5.0             | 9.6              | 78.8  | 0.6             | 11.4             | 87.9  |
| 1998–2002       | 24.6            | 40.4             | 126.4 | 8.2             | 81.0             | 144.8 | 8.0             | 12.2             | 97.1  | 0.6             | 12.9             | 85.4  |
| 2003–2007       | 25.2            | 43.6             | 133.5 | 6.0             | 72.8             | 130.1 | 6.4             | 11.9             | 91.2  | 0.4             | 11.5             | 83.7  |
| 2008–2012       | 16.4            | 34.2             | 102.2 | 2.2             | 42.7             | 87.8  | 5.4             | 12.0             | 88.5  | 1.0             | 15.4             | 103.0 |
|                 | 15–24           |                  |       | 55–64           |                  |       | 15–24           |                  |       | 55–64           |                  |       |
| 1983–1987       | 1.0             | 15.2             | 108.8 | 3.6             | 46.5             | 109.4 | 0.2             | 6.0              | 87.4  | 0.4             | 13.2             | 67.0  |
| 1988–1992       | 0.8             | 10.8             | 108.8 | 3.2             | 38.7             | 109.0 | 0.4             | 5.5              | 105.2 | 1.2             | 16.2             | 90.5  |
| 1993–1997       | 0.6             | 11.2             | 98.9  | 4.4             | 50.8             | 126.2 | 0.4             | 5.6              | 106.8 | 0.6             | 12.4             | 77.9  |
| 1998–2002       | 0.8             | 15.8             | 100.1 | 5.6             | 75.0             | 118.0 | 0.0             | 5.7              | 80.9  | 1.6             | 19.5             | 103.5 |
| 2003–2007       | 0.6             | 16.6             | 95.0  | 7.4             | 83.0             | 143.8 | 0.2             | 8.0              | 89.0  | 2.2             | 20.0             | 119.5 |
| 2008–2012       | 0.8             | 21.4             | 100.7 | 5.2             | 56.4             | 116.1 | 0.0             | 7.7              | 79.7  | 0.6             | 12.9             | 86.3  |
|                 | 25–34           |                  |       | 65–74           |                  |       | 25–34           |                  |       | 65–74           |                  |       |
| 1983–1987       | 2.2             | 27.4             | 107.3 | 2.4             | 51.2             | 117.0 | 1.4             | 13.3             | 123.5 | 1.4             | 27.4             | 87.6  |
| 1988–1992       | 1.8             | 23.1             | 121.0 | 1.4             | 32.0             | 90.8  | 0.4             | 8.0              | 92.3  | 0.8             | 17.9             | 68.8  |
| 1993–1997       | 1.2             | 20.1             | 103.0 | 2.4             | 35.9             | 112.5 | 0.6             | 8.8              | 105.5 | 1.4             | 18.6             | 95.5  |
| 1998–2002       | 1.4             | 26.7             | 98.9  | 3.4             | 48.4             | 106.4 | 0.2             | 9.8              | 84.8  | 1.8             | 21.4             | 101.9 |
| 2003–2007       | 2.2             | 34.9             | 112.5 | 3.0             | 45.6             | 106.3 | 0.4             | 11.7             | 90.2  | 1.4             | 18.3             | 98.3  |
| 2008–2012       | 1.0             | 29.5             | 90.6  | 2.6             | 41.8             | 105.8 | 0.2             | 12.3             | 85.6  | 1.4             | 18.4             | 103.4 |
|                 | 35–44           |                  |       | >74 y/o         |                  |       | 35–44           |                  |       | >74 y/o         |                  |       |
| 1983–1987       | 4.0             | 41.5             | 130.4 | 1.4             | 63.4             | 81.0  | 1.0             | 11.9             | 100.7 | 1.2             | 37.7             | 65.3  |
| 1988–1992       | 2.4             | 26.2             | 110.5 | 2.2             | 70.6             | 109.4 | 0.4             | 8.3              | 86.4  | 2.6             | 50.7             | 105.9 |
| 1993–1997       | 2.4             | 28.2             | 115.0 | 3.0             | 75.0             | 144.0 | 0.2             | 6.8              | 79.8  | 1.2             | 24.0             | 69.6  |
| 1998–2002       | 2.2             | 34.8             | 98.7  | 2.8             | 61.5             | 116.7 | 0.6             | 10.1             | 97.9  | 3.2             | 38.9             | 125.3 |
| 2003–2007       | 3.8             | 54.8             | 136.9 | 2.2             | 43.6             | 96.7  | 0.6             | 12.2             | 96.5  | 1.2             | 15.9             | 70.9  |
| 2008–2012       | 2.0             | 37.5             | 100.8 | 2.6             | 42.4             | 102.3 | 0.6             | 13.1             | 96.5  | 1.6             | 16.8             | 87.2  |

Secondary Medical Zone ID: 323

|                 | Male            |                  |       |                 |                  |       | Female          |                  |       |                 |                  |       |
|-----------------|-----------------|------------------|-------|-----------------|------------------|-------|-----------------|------------------|-------|-----------------|------------------|-------|
|                 | Suicide         |                  |       | Suicide         |                  |       | Suicide         |                  |       | Suicide         |                  |       |
|                 | Num<br>per year | Rate<br>/100,000 | × 100 | Num<br>per year | Rate<br>/100,000 | × 100 | Num<br>per year | Rate<br>/100,000 | × 100 | Num<br>per year | Rate<br>/100,000 | × 100 |
|                 |                 |                  |       |                 |                  |       |                 |                  |       |                 |                  |       |
| Total (>10 y/o) | 45–54           | Total (>10 y/o)  | 45–54 |                 |                  |       |                 |                  |       |                 |                  |       |
| 1983–1987       | 36.0            | 40.7             | 138.1 | 8.6             | 67.7             | 133.9 | 19.2            | 16.9             | 117.4 | 3.0             | 19.8             | 114.9 |
| 1988–1992       | 24.0            | 27.4             | 118.3 | 4.4             | 38.5             | 112.0 | 13.8            | 12.5             | 96.8  | 2.2             | 15.9             | 108.4 |
| 1993–1997       | 18.2            | 24.2             | 91.6  | 5.2             | 40.7             | 111.2 | 10.6            | 10.1             | 89.8  | 1.4             | 12.2             | 94.2  |
| 1998–2002       | 28.2            | 34.9             | 97.7  | 6.0             | 50.5             | 90.2  | 13.6            | 12.9             | 98.9  | 1.6             | 14.0             | 93.1  |
| 2003–2007       | 28.4            | 37.8             | 98.7  | 9.6             | 76.9             | 137.4 | 14.2            | 12.7             | 108.6 | 1.4             | 13.0             | 95.2  |
| 2008–2012       | 26.8            | 34.5             | 100.5 | 5.2             | 51.8             | 106.6 | 10.4            | 12.3             | 91.8  | 1.0             | 13.0             | 87.0  |
|                 | 15–24           |                  |       | 55–64           |                  |       | 15–24           |                  |       | 55–64           |                  |       |
| 1983–1987       | 2.0             | 17.9             | 128.0 | 6.6             | 54.0             | 127.0 | 0.4             | 5.9              | 86.1  | 4.4             | 26.2             | 133.0 |
| 1988–1992       | 1.2             | 10.9             | 109.6 | 5.2             | 41.3             | 116.2 | 1.0             | 6.8              | 128.2 | 2.2             | 16.7             | 93.5  |
| 1993–1997       | 1.0             | 11.2             | 99.1  | 4.2             | 39.0             | 96.9  | 0.6             | 5.5              | 105.9 | 2.8             | 18.6             | 116.8 |
| 1998–2002       | 2.0             | 18.6             | 117.7 | 6.2             | 60.8             | 95.6  | 1.0             | 8.3              | 118.6 | 2.4             | 19.0             | 100.9 |
| 2003–2007       | 2.2             | 21.1             | 120.7 | 5.0             | 47.5             | 82.3  | 0.2             | 6.9              | 76.6  | 3.0             | 19.3             | 115.3 |
| 2008–2012       | 1.4             | 20.8             | 97.9  | 6.2             | 48.5             | 99.9  | 0.4             | 8.6              | 88.2  | 1.6             | 13.8             | 92.7  |
|                 | 25–34           |                  |       | 65–74           |                  |       | 25–34           |                  |       | 65–74           |                  |       |
| 1983–1987       | 4.2             | 33.1             | 129.3 | 3.6             | 46.9             | 107.1 | 2.0             | 13.7             | 127.2 | 3.8             | 34.7             | 110.9 |
| 1988–1992       | 1.8             | 19.4             | 101.3 | 3.4             | 39.4             | 111.8 | 0.4             | 7.0              | 80.6  | 2.2             | 21.3             | 81.5  |
| 1993–1997       | 2.4             | 23.4             | 119.6 | 2.0             | 25.0             | 78.4  | 0.6             | 7.7              | 92.5  | 2.0             | 16.9             | 86.8  |
| 1998–2002       | 2.0             | 25.1             | 93.0  | 5.0             | 47.3             | 104.0 | 1.4             | 12.7             | 109.3 | 1.6             | 15.7             | 74.9  |
| 2003–2007       | 3.4             | 34.2             | 110.2 | 1.8             | 27.5             | 64.1  | 1.0             | 12.3             | 94.6  | 2.2             | 17.9             | 96.3  |
| 2008–2012       | 3.0             | 33.0             | 101.3 | 3.4             | 37.6             | 95.3  | 1.0             | 13.6             | 94.6  | 1.4             | 15.2             | 85.5  |
|                 | 35–44           |                  |       | >74 y/o         |                  |       | 35–44           |                  |       | >74 y/o         |                  |       |
| 1983–1987       | 7.0             | 48.2             | 151.6 | 4.0             | 85.8             | 109.6 | 1.4             | 11.5             | 97.3  | 4.0             | 58.2             | 100.9 |
| 1988–1992       | 4.4             | 30.5             | 128.5 | 3.6             | 67.2             | 104.1 | 1.8             | 11.3             | 116.8 | 3.8             | 42.8             | 89.5  |
| 1993–1997       | 1.8             | 19.2             | 78.4  | 1.6             | 34.6             | 66.5  | 0.8             | 7.9              | 92.4  | 2.4             | 24.7             | 71.7  |
| 1998–2002       | 3.2             | 34.0             | 96.6  | 3.6             | 53.1             | 100.8 | 1.2             | 10.8             | 104.9 | 4.2             | 32.5             | 104.7 |
| 2003–2007       | 3.2             | 37.2             | 92.8  | 3.2             | 41.1             | 91.4  | 1.6             | 14.1             | 111.5 | 4.8             | 29.7             | 132.4 |
| 2008–2012       | 3.0             | 34.3             | 92.1  | 4.4             | 45.0             | 108.6 | 1.6             | 14.5             | 107.0 | 3.4             | 19.8             | 102.8 |

Secondary Medical Zone ID: 324

|           | Male            |          |       |          |          |       | Female          |          |       |          |          |       |
|-----------|-----------------|----------|-------|----------|----------|-------|-----------------|----------|-------|----------|----------|-------|
|           | Suicide         |          |       | Suicide  |          |       | Suicide         |          |       | Suicide  |          |       |
|           | Num             | Rate     | × 100 | Num      | Rate     | × 100 | Num             | Rate     | × 100 | Num      | Rate     | × 100 |
|           | per year        | /100,000 |       | per year | /100,000 |       | per year        | /100,000 |       | per year | /100,000 |       |
|           | Total (>10 y/o) |          |       | 45–54    |          |       | Total (>10 y/o) |          |       | 45–54    |          |       |
| 1983–1987 | 31.4            | 37.9     | 127.9 | 7.2      | 57.1     | 112.9 | 13.4            | 15.0     | 98.1  | 1.8      | 15.2     | 88.4  |
| 1988–1992 | 23.6            | 27.8     | 123.9 | 5.0      | 41.4     | 120.5 | 12.8            | 13.0     | 101.6 | 1.6      | 14.0     | 95.6  |
| 1993–1997 | 26.2            | 29.9     | 130.7 | 5.6      | 42.4     | 115.9 | 14.8            | 12.2     | 126.5 | 2.6      | 16.0     | 123.7 |
| 1998–2002 | 35.0            | 40.8     | 122.6 | 9.4      | 68.1     | 121.6 | 13.2            | 12.3     | 103.5 | 1.8      | 14.6     | 96.7  |
| 2003–2007 | 32.4            | 39.7     | 117.2 | 6.6      | 58.6     | 104.8 | 11.2            | 12.5     | 97.4  | 2.6      | 17.0     | 124.3 |
| 2008–2012 | 26.4            | 34.9     | 106.5 | 4.8      | 50.5     | 104.0 | 11.6            | 12.7     | 102.5 | 1.2      | 13.9     | 93.1  |
|           | 15–24           |          |       | 55–64    |          |       | 15–24           |          |       | 55–64    |          |       |
| 1983–1987 | 1.0             | 12.5     | 89.6  | 6.0      | 53.8     | 126.5 | 0.4             | 5.9      | 86.2  | 2.2      | 18.9     | 95.6  |
| 1988–1992 | 0.6             | 9.0      | 91.0  | 6.4      | 49.1     | 138.3 | 0.4             | 4.9      | 93.4  | 1.8      | 15.8     | 88.4  |
| 1993–1997 | 1.0             | 11.4     | 100.6 | 5.0      | 43.8     | 108.7 | 0.4             | 5.0      | 95.9  | 2.4      | 17.4     | 109.2 |
| 1998–2002 | 1.6             | 17.2     | 108.6 | 7.6      | 71.4     | 112.3 | 0.2             | 5.7      | 81.8  | 3.0      | 21.6     | 114.5 |
| 2003–2007 | 0.8             | 15.4     | 88.1  | 7.2      | 62.4     | 108.1 | 0.0             | 6.0      | 66.7  | 2.2      | 17.3     | 103.4 |
| 2008–2012 | 0.8             | 18.4     | 86.8  | 8.0      | 58.3     | 120.0 | 0.4             | 8.7      | 89.8  | 2.8      | 17.6     | 117.8 |
|           | 25–34           |          |       | 65–74    |          |       | 25–34           |          |       | 65–74    |          |       |
| 1983–1987 | 5.4             | 36.2     | 141.5 | 2.4      | 43.9     | 100.3 | 1.6             | 11.3     | 105.2 | 1.8      | 26.4     | 84.3  |
| 1988–1992 | 1.6             | 17.5     | 91.4  | 2.6      | 38.1     | 108.0 | 0.8             | 8.1      | 93.8  | 3.8      | 35.4     | 135.9 |
| 1993–1997 | 2.4             | 23.4     | 119.7 | 3.2      | 36.1     | 113.3 | 0.8             | 8.4      | 100.6 | 3.4      | 26.3     | 134.9 |
| 1998–2002 | 2.6             | 28.6     | 105.8 | 5.4      | 51.6     | 113.4 | 0.4             | 9.4      | 81.1  | 2.4      | 20.2     | 96.2  |
| 2003–2007 | 2.6             | 31.4     | 101.1 | 5.4      | 51.4     | 119.8 | 1.0             | 12.6     | 97.1  | 2.8      | 21.0     | 113.0 |
| 2008–2012 | 1.4             | 27.3     | 83.9  | 3.6      | 40.4     | 102.2 | 1.2             | 14.8     | 103.3 | 2.2      | 18.8     | 105.8 |
|           | 35–44           |          |       | >74 y/o  |          |       | 35–44           |          |       | >74 y/o  |          |       |
| 1983–1987 | 5.8             | 39.8     | 125.2 | 3.2      | 94.8     | 121.0 | 3.0             | 16.2     | 136.9 | 2.6      | 55.0     | 95.3  |
| 1988–1992 | 4.2             | 28.4     | 119.7 | 3.0      | 74.8     | 116.0 | 1.8             | 11.0     | 113.5 | 2.6      | 41.7     | 87.1  |
| 1993–1997 | 5.8             | 39.9     | 162.9 | 3.2      | 66.3     | 127.3 | 1.2             | 9.0      | 106.4 | 4.0      | 46.0     | 133.7 |
| 1998–2002 | 5.2             | 46.0     | 130.6 | 3.2      | 57.7     | 109.4 | 0.6             | 8.6      | 83.3  | 4.6      | 41.9     | 134.8 |
| 2003–2007 | 5.2             | 53.4     | 133.4 | 4.6      | 58.1     | 129.0 | 1.0             | 12.1     | 96.1  | 1.6      | 14.8     | 65.8  |
| 2008–2012 | 4.0             | 41.7     | 112.2 | 3.8      | 42.7     | 102.9 | 0.4             | 10.9     | 80.6  | 3.2      | 20.3     | 105.5 |

Secondary Medical Zone ID: 325

|           | Male            |          |       |          |          |       | Female          |          |       |          |          |       |
|-----------|-----------------|----------|-------|----------|----------|-------|-----------------|----------|-------|----------|----------|-------|
|           | Suicide         |          |       | Suicide  |          |       | Suicide         |          |       | Suicide  |          |       |
|           | Num             | Rate     | × 100 | Num      | Rate     | × 100 | Num             | Rate     | × 100 | Num      | Rate     | × 100 |
|           | per year        | /100,000 |       | per year | /100,000 |       | per year        | /100,000 |       | per year | /100,000 |       |
|           | Total (>10 y/o) |          |       | 45–54    |          |       | Total (>10 y/o) |          |       | 45–54    |          |       |
| 1983–1987 | 14.2            | 33.6     | 107.2 | 3.8      | 55.0     | 108.8 | 10.4            | 17.0     | 124.4 | 2.4      | 22.8     | 132.2 |
| 1988–1992 | 14.0            | 27.6     | 126.2 | 2.0      | 33.4     | 97.4  | 7.2             | 12.7     | 101.9 | 1.0      | 14.6     | 100.0 |
| 1993–1997 | 15.2            | 28.3     | 127.4 | 2.6      | 37.2     | 101.6 | 5.6             | 10.5     | 94.1  | 0.8      | 12.3     | 95.5  |
| 1998–2002 | 22.0            | 39.8     | 127.1 | 5.0      | 62.0     | 110.8 | 8.4             | 13.1     | 109.2 | 2.0      | 18.2     | 120.7 |
| 2003–2007 | 21.4            | 42.6     | 125.7 | 6.0      | 75.8     | 135.5 | 8.4             | 13.2     | 112.5 | 1.2      | 14.6     | 106.8 |
| 2008–2012 | 20.0            | 37.8     | 123.1 | 4.4      | 60.8     | 125.0 | 7.4             | 13.5     | 105.6 | 0.8      | 14.5     | 97.0  |
|           | 15–24           |          |       | 55–64    |          |       | 15–24           |          |       | 55–64    |          |       |
| 1983–1987 | 1.2             | 17.1     | 122.7 | 2.6      | 45.6     | 107.4 | 0.2             | 6.1      | 89.4  | 1.2      | 19.4     | 98.2  |
| 1988–1992 | 0.6             | 10.3     | 104.0 | 1.6      | 30.7     | 86.4  | 0.2             | 5.0      | 93.9  | 2.6      | 24.5     | 137.3 |
| 1993–1997 | 1.0             | 13.0     | 115.0 | 1.8      | 35.1     | 87.1  | 0.4             | 5.7      | 109.1 | 1.0      | 15.4     | 97.1  |
| 1998–2002 | 2.2             | 23.1     | 146.2 | 3.6      | 61.9     | 97.4  | 0.4             | 7.3      | 103.2 | 0.6      | 16.0     | 85.1  |
| 2003–2007 | 0.6             | 16.9     | 97.1  | 3.0      | 51.0     | 88.3  | 0.2             | 8.1      | 90.4  | 1.0      | 15.9     | 95.1  |
| 2008–2012 | 0.4             | 19.1     | 90.1  | 5.8      | 61.4     | 126.4 | 0.6             | 11.2     | 115.7 | 0.8      | 13.7     | 91.9  |
|           | 25–34           |          |       | 65–74    |          |       | 25–34           |          |       | 65–74    |          |       |
| 1983–1987 | 2.8             | 31.8     | 124.3 | 0.6      | 34.5     | 78.9  | 1.2             | 12.6     | 116.7 | 1.8      | 36.2     | 115.8 |
| 1988–1992 | 1.2             | 19.9     | 103.9 | 2.4      | 48.5     | 137.7 | 1.0             | 10.5     | 121.0 | 1.2      | 25.0     | 95.8  |
| 1993–1997 | 1.2             | 20.9     | 107.0 | 2.8      | 45.7     | 143.2 | 0.8             | 9.6      | 115.7 | 1.2      | 19.8     | 101.6 |
| 1998–2002 | 2.4             | 33.1     | 122.5 | 3.8      | 56.7     | 124.6 | 0.8             | 12.2     | 105.7 | 1.4      | 21.2     | 100.7 |
| 2003–2007 | 2.6             | 38.0     | 122.6 | 3.2      | 50.1     | 116.7 | 1.2             | 15.3     | 117.3 | 1.8      | 21.8     | 117.1 |
| 2008–2012 | 1.2             | 30.6     | 93.9  | 2.2      | 40.2     | 101.7 | 0.4             | 13.0     | 91.0  | 1.6      | 20.0     | 112.2 |
|           | 35–44           |          |       | >74 y/o  |          |       | 35–44           |          |       | >74 y/o  |          |       |
| 1983–1987 | 1.6             | 27.3     | 85.9  | 1.6      | 85.0     | 108.5 | 2.0             | 16.0     | 135.4 | 1.6      | 57.8     | 100.1 |
| 1988–1992 | 3.6             | 34.7     | 146.5 | 2.6      | 93.2     | 144.5 | 0.2             | 7.8      | 80.8  | 1.0      | 33.5     | 69.9  |
| 1993–1997 | 3.4             | 36.1     | 147.4 | 2.4      | 75.0     | 144.1 | 0.4             | 7.6      | 89.9  | 1.0      | 25.6     | 74.4  |
| 1998–2002 | 2.2             | 36.0     | 102.3 | 2.8      | 72.3     | 137.2 | 0.8             | 11.0     | 106.3 | 2.4      | 37.4     | 120.4 |
| 2003–2007 | 4.2             | 60.2     | 150.2 | 1.8      | 45.2     | 100.3 | 0.6             | 12.2     | 96.6  | 2.4      | 29.2     | 129.9 |
| 2008–2012 | 3.0             | 43.3     | 116.4 | 3.0      | 50.8     | 122.4 | 1.4             | 16.1     | 118.6 | 1.8      | 20.3     | 105.4 |

Secondary Medical Zone ID: 326

|           | Male            |                  |       |                 |                  |       | Female          |                  |       |                 |                  |       |
|-----------|-----------------|------------------|-------|-----------------|------------------|-------|-----------------|------------------|-------|-----------------|------------------|-------|
|           | Suicide         |                  |       | Suicide         |                  |       | Suicide         |                  |       | Suicide         |                  |       |
|           | Num<br>per year | Rate<br>/100,000 | × 100 | Num<br>per year | Rate<br>/100,000 | × 100 | Num<br>per year | Rate<br>/100,000 | × 100 | Num<br>per year | Rate<br>/100,000 | × 100 |
|           |                 |                  |       |                 |                  |       |                 |                  |       |                 |                  |       |
|           | Total (>10 y/o) |                  |       | 45–54           |                  |       | Total (>10 y/o) |                  |       | 45–54           |                  |       |
| 1983–1987 | 51.0            | 35.6             | 111.7 | 14.6            | 64.2             | 126.9 | 24.6            | 14.9             | 97.2  | 2.2             | 12.1             | 70.1  |
| 1988–1992 | 41.0            | 25.9             | 106.8 | 8.8             | 36.5             | 106.3 | 21.2            | 11.6             | 87.1  | 5.8             | 19.0             | 130.2 |
| 1993–1997 | 48.2            | 26.8             | 110.0 | 13.4            | 44.0             | 120.4 | 20.4            | 9.8              | 88.8  | 5.4             | 15.7             | 121.8 |
| 1998–2002 | 81.8            | 42.0             | 120.8 | 22.8            | 69.7             | 124.6 | 27.8            | 12.3             | 96.4  | 4.6             | 14.2             | 94.3  |
| 2003–2007 | 83.8            | 41.2             | 119.3 | 19.4            | 66.0             | 117.9 | 30.8            | 13.0             | 105.2 | 4.4             | 13.9             | 101.6 |
| 2008–2012 | 71.2            | 35.7             | 108.0 | 12.8            | 49.5             | 101.8 | 24.2            | 11.9             | 85.9  | 2.6             | 11.2             | 75.0  |
|           | 15–24           |                  |       | 55–64           |                  |       | 15–24           |                  |       | 55–64           |                  |       |
| 1983–1987 | 2.4             | 11.7             | 83.6  | 7.6             | 44.9             | 105.7 | 3.8             | 11.2             | 164.4 | 3.6             | 18.6             | 94.1  |
| 1988–1992 | 2.6             | 9.8              | 99.4  | 7.4             | 36.5             | 102.7 | 1.2             | 4.6              | 87.6  | 3.0             | 14.7             | 82.4  |
| 1993–1997 | 3.0             | 10.6             | 93.8  | 9.8             | 44.2             | 109.9 | 0.8             | 3.7              | 70.4  | 4.2             | 16.6             | 104.7 |
| 1998–2002 | 5.4             | 18.4             | 116.5 | 16.8            | 70.5             | 111.0 | 2.2             | 7.5              | 106.6 | 5.0             | 19.0             | 100.9 |
| 2003–2007 | 5.8             | 21.8             | 125.1 | 20.8            | 71.5             | 123.8 | 2.4             | 9.4              | 104.7 | 4.8             | 16.0             | 95.8  |
| 2008–2012 | 4.4             | 21.3             | 100.4 | 16.0            | 51.0             | 104.9 | 3.2             | 12.7             | 130.8 | 3.2             | 11.5             | 77.2  |
|           | 25–34           |                  |       | 65–74           |                  |       | 25–34           |                  |       | 65–74           |                  |       |
| 1983–1987 | 9.0             | 31.1             | 121.8 | 2.0             | 29.3             | 66.9  | 3.4             | 11.1             | 103.5 | 3.6             | 29.0             | 92.9  |
| 1988–1992 | 7.2             | 26.8             | 140.4 | 3.8             | 34.3             | 97.3  | 2.0             | 7.8              | 90.1  | 2.6             | 18.8             | 72.2  |
| 1993–1997 | 3.8             | 16.7             | 85.6  | 4.4             | 30.1             | 94.2  | 1.2             | 6.0              | 72.1  | 2.6             | 15.0             | 76.9  |
| 1998–2002 | 9.0             | 31.8             | 117.9 | 6.8             | 39.5             | 86.9  | 3.8             | 12.4             | 107.0 | 6.4             | 26.3             | 125.0 |
| 2003–2007 | 6.4             | 25.7             | 82.8  | 11.0            | 52.8             | 123.0 | 2.8             | 10.8             | 83.4  | 4.8             | 19.7             | 105.5 |
| 2008–2012 | 8.8             | 35.5             | 108.9 | 9.6             | 43.9             | 111.1 | 4.2             | 15.4             | 107.2 | 4.2             | 17.3             | 97.2  |
|           | 35–44           |                  |       | >74 y/o         |                  |       | 35–44           |                  |       | >74 y/o         |                  |       |
| 1983–1987 | 10.4            | 35.3             | 110.8 | 5.0             | 94.4             | 120.5 | 4.0             | 12.5             | 105.6 | 3.8             | 50.0             | 86.7  |
| 1988–1992 | 9.0             | 27.6             | 116.5 | 2.2             | 41.7             | 64.7  | 2.6             | 8.5              | 88.0  | 4.0             | 36.4             | 76.0  |
| 1993–1997 | 9.0             | 29.3             | 119.4 | 4.8             | 59.0             | 113.3 | 1.6             | 6.3              | 74.0  | 4.6             | 31.5             | 91.6  |
| 1998–2002 | 14.8            | 51.3             | 145.5 | 6.2             | 59.9             | 113.5 | 2.2             | 8.6              | 82.9  | 3.6             | 20.7             | 66.6  |
| 2003–2007 | 11.8            | 45.3             | 113.0 | 8.2             | 57.0             | 126.6 | 4.8             | 15.2             | 120.7 | 6.8             | 27.3             | 121.8 |
| 2008–2012 | 10.2            | 37.6             | 101.1 | 9.4             | 51.5             | 124.2 | 2.4             | 10.3             | 76.0  | 4.4             | 15.7             | 81.6  |

Secondary Medical Zone ID: 327

|                 | Male            |                  |       |                 |                  |       | Female          |                  |       |                 |                  |       |
|-----------------|-----------------|------------------|-------|-----------------|------------------|-------|-----------------|------------------|-------|-----------------|------------------|-------|
|                 | Suicide         |                  |       | Suicide         |                  |       | Suicide         |                  |       | Suicide         |                  |       |
|                 | Num<br>per year | Rate<br>/100,000 | × 100 | Num<br>per year | Rate<br>/100,000 | × 100 | Num<br>per year | Rate<br>/100,000 | × 100 | Num<br>per year | Rate<br>/100,000 | × 100 |
|                 |                 |                  |       |                 |                  |       |                 |                  |       |                 |                  |       |
| Total (>10 y/o) | 45–54           | Total (>10 y/o)  | 45–54 |                 |                  |       |                 |                  |       |                 |                  |       |
| 1983–1987       | 21.2            | 37.7             | 129.9 | 5.8             | 67.6             | 133.6 | 10.8            | 16.3             | 113.8 | 2.4             | 21.9             | 127.3 |
| 1988–1992       | 14.8            | 26.5             | 115.5 | 3.4             | 41.5             | 120.9 | 8.2             | 12.5             | 99.4  | 0.8             | 13.5             | 92.1  |
| 1993–1997       | 19.4            | 30.0             | 136.7 | 5.4             | 50.8             | 138.9 | 8.0             | 11.0             | 106.5 | 1.2             | 13.4             | 103.6 |
| 1998–2002       | 23.2            | 38.8             | 116.5 | 5.0             | 56.6             | 101.1 | 7.0             | 11.7             | 89.3  | 1.0             | 13.9             | 92.4  |
| 2003–2007       | 25.4            | 41.9             | 127.2 | 7.0             | 77.7             | 138.9 | 8.0             | 12.3             | 101.1 | 0.8             | 12.7             | 92.4  |
| 2008–2012       | 23.2            | 37.6             | 124.7 | 3.4             | 50.9             | 104.7 | 8.8             | 13.5             | 108.3 | 0.8             | 14.1             | 94.7  |
|                 | 15–24           |                  |       | 55–64           |                  |       | 15–24           |                  |       | 55–64           |                  |       |
| 1983–1987       | 1.4             | 16.8             | 120.1 | 4.2             | 54.9             | 129.3 | 1.2             | 9.6              | 139.9 | 1.8             | 21.2             | 107.4 |
| 1988–1992       | 0.0             | 7.2              | 72.9  | 3.0             | 39.0             | 109.8 | 0.2             | 4.7              | 88.9  | 2.0             | 20.5             | 115.0 |
| 1993–1997       | 0.6             | 10.3             | 90.7  | 4.0             | 48.5             | 120.6 | 0.0             | 4.0              | 75.8  | 1.2             | 15.8             | 99.1  |
| 1998–2002       | 1.6             | 17.9             | 113.2 | 4.4             | 63.7             | 100.3 | 0.2             | 6.1              | 87.3  | 1.8             | 20.3             | 108.0 |
| 2003–2007       | 1.0             | 17.1             | 97.9  | 5.0             | 61.2             | 106.1 | 0.0             | 6.6              | 73.0  | 1.0             | 15.3             | 91.5  |
| 2008–2012       | 0.8             | 19.9             | 94.0  | 6.6             | 61.8             | 127.2 | 0.6             | 10.5             | 108.6 | 1.4             | 15.1             | 101.4 |
|                 | 25–34           |                  |       | 65–74           |                  |       | 25–34           |                  |       | 65–74           |                  |       |
| 1983–1987       | 2.6             | 29.2             | 114.2 | 1.2             | 37.3             | 85.2  | 0.6             | 9.6              | 89.2  | 2.0             | 33.5             | 107.2 |
| 1988–1992       | 2.2             | 25.9             | 135.6 | 2.8             | 48.2             | 136.7 | 0.4             | 8.0              | 91.8  | 1.8             | 27.2             | 104.2 |
| 1993–1997       | 1.6             | 22.8             | 116.7 | 2.8             | 41.7             | 130.9 | 0.4             | 8.0              | 95.8  | 2.2             | 25.0             | 128.5 |
| 1998–2002       | 1.4             | 25.9             | 96.1  | 4.0             | 54.2             | 119.2 | 0.0             | 8.9              | 76.7  | 1.4             | 19.8             | 94.5  |
| 2003–2007       | 3.6             | 42.0             | 135.6 | 3.0             | 45.1             | 105.2 | 0.2             | 10.5             | 81.0  | 2.0             | 21.9             | 117.4 |
| 2008–2012       | 2.2             | 34.7             | 106.5 | 2.6             | 40.5             | 102.6 | 1.4             | 17.1             | 119.1 | 1.4             | 18.3             | 103.0 |
|                 | 35–44           |                  |       | >74 y/o         |                  |       | 35–44           |                  |       | >74 y/o         |                  |       |
| 1983–1987       | 4.2             | 41.8             | 131.2 | 1.8             | 81.1             | 103.6 | 0.6             | 10.3             | 87.4  | 2.2             | 62.0             | 107.4 |
| 1988–1992       | 2.0             | 23.2             | 98.1  | 1.4             | 57.6             | 89.3  | 1.2             | 10.8             | 111.5 | 1.8             | 41.2             | 86.1  |
| 1993–1997       | 3.6             | 35.5             | 144.8 | 1.4             | 47.4             | 91.0  | 0.4             | 7.4              | 87.3  | 2.6             | 41.1             | 119.5 |
| 1998–2002       | 3.8             | 46.4             | 131.7 | 3.0             | 67.4             | 127.8 | 0.6             | 9.9              | 96.0  | 2.0             | 28.5             | 91.7  |
| 2003–2007       | 2.6             | 42.8             | 106.9 | 3.2             | 57.1             | 126.8 | 1.2             | 14.4             | 114.3 | 2.8             | 28.9             | 129.0 |
| 2008–2012       | 3.0             | 42.1             | 113.3 | 4.4             | 60.0             | 144.7 | 1.0             | 14.3             | 105.6 | 2.2             | 21.0             | 109.2 |



Secondary Medical Zone ID: 328

|                 | Male            |                  |       |                 |                  |       | Female          |                  |       |                 |                  |       |
|-----------------|-----------------|------------------|-------|-----------------|------------------|-------|-----------------|------------------|-------|-----------------|------------------|-------|
|                 | Suicide         |                  |       | Suicide         |                  |       | Suicide         |                  |       | Suicide         |                  |       |
|                 | Num<br>per year | Rate<br>/100,000 | × 100 | Num<br>per year | Rate<br>/100,000 | × 100 | Num<br>per year | Rate<br>/100,000 | × 100 | Num<br>per year | Rate<br>/100,000 | × 100 |
|                 |                 |                  |       |                 |                  |       |                 |                  |       |                 |                  |       |
| Total (>10 y/o) | 45–54           | Total (>10 y/o)  | 45–54 |                 |                  |       |                 |                  |       |                 |                  |       |
| 1983–1987       | 18.6            | 37.2             | 130.4 | 4.6             | 62.0             | 122.6 | 7.8             | 15.0             | 97.4  | 3.0             | 25.0             | 144.9 |
| 1988–1992       | 15.2            | 29.0             | 135.7 | 3.0             | 42.8             | 124.5 | 9.6             | 14.1             | 119.9 | 1.6             | 17.1             | 117.0 |
| 1993–1997       | 18.2            | 30.7             | 153.2 | 3.2             | 43.3             | 118.4 | 7.8             | 11.8             | 115.3 | 1.0             | 13.7             | 105.8 |
| 1998–2002       | 21.2            | 40.3             | 132.3 | 4.8             | 65.3             | 116.7 | 8.6             | 13.1             | 113.0 | 1.4             | 16.7             | 111.1 |
| 2003–2007       | 20.0            | 43.7             | 130.9 | 5.4             | 76.1             | 136.1 | 7.0             | 13.2             | 105.6 | 1.4             | 16.1             | 117.2 |
| 2008–2012       | 18.8            | 38.0             | 131.0 | 3.4             | 57.3             | 117.8 | 6.2             | 13.2             | 102.5 | 0.2             | 12.3             | 82.4  |
|                 | 15–24           |                  |       | 55–64           |                  |       | 15–24           |                  |       | 55–64           |                  |       |
| 1983–1987       | 0.8             | 15.1             | 108.2 | 4.0             | 55.3             | 130.0 | 0.0             | 5.5              | 80.9  | 0.8             | 16.3             | 82.6  |
| 1988–1992       | 1.0             | 12.3             | 123.7 | 4.0             | 49.1             | 138.4 | 0.2             | 5.1              | 96.2  | 1.2             | 17.0             | 95.3  |
| 1993–1997       | 1.4             | 15.1             | 133.8 | 2.6             | 41.5             | 103.2 | 0.4             | 5.8              | 111.4 | 2.2             | 21.2             | 133.3 |
| 1998–2002       | 0.2             | 13.5             | 85.7  | 6.0             | 86.9             | 136.7 | 0.2             | 6.6              | 94.3  | 2.4             | 23.9             | 127.1 |
| 2003–2007       | 0.8             | 18.4             | 105.7 | 3.4             | 58.3             | 101.1 | 0.4             | 9.3              | 103.7 | 1.8             | 19.7             | 117.6 |
| 2008–2012       | 0.0             | 17.3             | 81.5  | 4.0             | 54.2             | 111.7 | 0.6             | 11.5             | 118.8 | 1.2             | 15.8             | 105.8 |
|                 | 25–34           |                  |       | 65–74           |                  |       | 25–34           |                  |       | 65–74           |                  |       |
| 1983–1987       | 2.8             | 33.3             | 130.4 | 1.6             | 44.0             | 100.6 | 0.6             | 10.2             | 95.0  | 1.2             | 27.8             | 89.0  |
| 1988–1992       | 1.6             | 24.0             | 125.7 | 1.4             | 34.7             | 98.4  | 0.8             | 10.0             | 115.9 | 2.2             | 32.0             | 122.8 |
| 1993–1997       | 1.8             | 26.6             | 136.4 | 4.2             | 57.5             | 180.3 | 0.2             | 7.7              | 91.9  | 1.2             | 18.7             | 95.8  |
| 1998–2002       | 1.4             | 29.5             | 109.3 | 4.4             | 60.5             | 133.1 | 0.0             | 9.7              | 83.6  | 2.0             | 23.9             | 113.7 |
| 2003–2007       | 1.6             | 34.5             | 111.2 | 2.2             | 41.7             | 97.3  | 0.2             | 11.6             | 89.2  | 0.6             | 14.9             | 80.1  |
| 2008–2012       | 1.2             | 32.9             | 101.1 | 4.6             | 59.8             | 151.4 | 0.4             | 13.8             | 96.6  | 1.6             | 20.3             | 113.9 |
|                 | 35–44           |                  |       | >74 y/o         |                  |       | 35–44           |                  |       | >74 y/o         |                  |       |
| 1983–1987       | 2.6             | 36.0             | 113.2 | 2.2             | 91.4             | 116.8 | 0.6             | 11.1             | 94.1  | 1.6             | 50.3             | 87.2  |
| 1988–1992       | 2.2             | 27.8             | 117.2 | 2.0             | 72.8             | 112.9 | 0.4             | 8.8              | 91.2  | 3.2             | 65.2             | 136.2 |
| 1993–1997       | 2.0             | 28.3             | 115.4 | 3.0             | 81.1             | 155.7 | 1.0             | 10.5             | 123.6 | 1.8             | 34.0             | 98.7  |
| 1998–2002       | 1.4             | 32.2             | 91.5  | 3.0             | 71.3             | 135.2 | 0.4             | 9.7              | 93.8  | 2.2             | 33.0             | 106.1 |
| 2003–2007       | 4.2             | 68.7             | 171.5 | 2.4             | 50.5             | 112.1 | 1.0             | 14.7             | 116.4 | 1.6             | 20.9             | 93.1  |
| 2008–2012       | 2.4             | 43.9             | 118.1 | 3.2             | 52.2             | 125.7 | 0.4             | 13.2             | 97.0  | 1.8             | 19.4             | 101.0 |

Secondary Medical Zone ID: 329

|                 | Male            |                  |       |                 |                  |       | Female          |                  |       |                 |                  |       |
|-----------------|-----------------|------------------|-------|-----------------|------------------|-------|-----------------|------------------|-------|-----------------|------------------|-------|
|                 | Suicide         |                  |       | Suicide         |                  |       | Suicide         |                  |       | Suicide         |                  |       |
|                 | Num<br>per year | Rate<br>/100,000 | × 100 | Num<br>per year | Rate<br>/100,000 | × 100 | Num<br>per year | Rate<br>/100,000 | × 100 | Num<br>per year | Rate<br>/100,000 | × 100 |
|                 |                 |                  |       |                 |                  |       |                 |                  |       |                 |                  |       |
| Total (>10 y/o) | 45–54           | Total (>10 y/o)  | 45–54 |                 |                  |       |                 |                  |       |                 |                  |       |
| 1983–1987       | 40.2            | 43.7             | 154.5 | 10.8            | 78.3             | 154.7 | 20.8            | 18.1             | 132.0 | 4.4             | 24.5             | 142.0 |
| 1988–1992       | 34.2            | 34.0             | 160.3 | 7.2             | 51.7             | 150.5 | 19.6            | 15.1             | 132.7 | 1.2             | 12.5             | 85.8  |
| 1993–1997       | 36.4            | 33.8             | 157.4 | 7.2             | 47.1             | 128.8 | 20.0            | 13.8             | 147.5 | 5.4             | 24.0             | 186.2 |
| 1998–2002       | 49.2            | 44.8             | 146.1 | 10.8            | 68.3             | 122.0 | 19.2            | 13.7             | 123.7 | 2.6             | 16.1             | 106.9 |
| 2003–2007       | 53.8            | 48.8             | 158.2 | 12.2            | 81.3             | 145.3 | 18.8            | 13.6             | 124.7 | 2.0             | 13.8             | 100.6 |
| 2008–2012       | 39.6            | 38.2             | 125.5 | 9.0             | 65.9             | 135.6 | 17.8            | 12.9             | 119.1 | 1.8             | 14.6             | 97.7  |
|                 | 15–24           |                  |       | 55–64           |                  |       | 15–24           |                  |       | 55–64           |                  |       |
| 1983–1987       | 3.2             | 23.9             | 171.7 | 7.2             | 59.5             | 139.9 | 0.8             | 7.0              | 103.2 | 4.8             | 28.8             | 145.9 |
| 1988–1992       | 1.6             | 11.8             | 118.7 | 7.0             | 51.0             | 143.7 | 1.4             | 7.8              | 147.8 | 4.6             | 25.5             | 142.7 |
| 1993–1997       | 2.2             | 13.9             | 123.1 | 7.4             | 54.2             | 134.7 | 0.4             | 4.6              | 88.9  | 2.6             | 17.6             | 110.5 |
| 1998–2002       | 0.8             | 12.1             | 76.8  | 14.0            | 102.9            | 161.9 | 0.2             | 5.3              | 75.2  | 4.2             | 24.8             | 132.0 |
| 2003–2007       | 1.6             | 16.9             | 96.9  | 10.8            | 75.3             | 130.5 | 0.4             | 6.9              | 77.2  | 3.8             | 21.3             | 127.0 |
| 2008–2012       | 1.4             | 19.0             | 89.6  | 9.6             | 58.9             | 121.2 | 0.4             | 7.6              | 78.7  | 2.6             | 15.8             | 106.1 |
|                 | 25–34           |                  |       | 65–74           |                  |       | 25–34           |                  |       | 65–74           |                  |       |
| 1983–1987       | 3.0             | 24.3             | 95.0  | 5.0             | 64.3             | 146.9 | 1.8             | 11.8             | 109.8 | 3.2             | 34.2             | 109.4 |
| 1988–1992       | 3.8             | 28.3             | 148.0 | 3.6             | 42.8             | 121.4 | 1.2             | 9.1              | 105.5 | 5.2             | 41.3             | 158.2 |
| 1993–1997       | 2.8             | 24.2             | 123.7 | 4.0             | 39.3             | 123.3 | 1.0             | 8.6              | 103.2 | 4.0             | 27.6             | 141.4 |
| 1998–2002       | 3.4             | 30.4             | 112.7 | 7.8             | 62.9             | 138.2 | 0.4             | 8.8              | 75.9  | 4.8             | 29.8             | 141.7 |
| 2003–2007       | 5.8             | 43.7             | 140.9 | 8.8             | 68.0             | 158.6 | 1.4             | 12.8             | 98.5  | 4.8             | 28.0             | 150.5 |
| 2008–2012       | 2.6             | 29.1             | 89.2  | 7.0             | 55.4             | 140.3 | 1.2             | 13.0             | 90.9  | 4.0             | 24.4             | 137.0 |
|                 | 35–44           |                  |       | >74 y/o         |                  |       | 35–44           |                  |       | >74 y/o         |                  |       |
| 1983–1987       | 7.2             | 46.1             | 145.0 | 3.6             | 97.7             | 124.7 | 1.6             | 11.8             | 100.1 | 4.2             | 73.4             | 127.2 |
| 1988–1992       | 6.0             | 34.8             | 147.0 | 4.8             | 98.1             | 152.0 | 1.0             | 8.5              | 88.1  | 5.0             | 62.7             | 131.0 |
| 1993–1997       | 6.8             | 41.0             | 167.1 | 6.0             | 98.2             | 188.5 | 1.0             | 7.8              | 92.3  | 5.6             | 54.1             | 157.1 |
| 1998–2002       | 5.8             | 44.1             | 125.3 | 6.6             | 89.1             | 169.0 | 1.6             | 11.3             | 109.0 | 5.4             | 42.2             | 135.8 |
| 2003–2007       | 7.0             | 58.6             | 146.4 | 7.6             | 79.0             | 175.4 | 1.2             | 11.8             | 93.3  | 5.2             | 32.3             | 143.7 |
| 2008–2012       | 3.4             | 35.1             | 94.3  | 6.6             | 59.3             | 143.0 | 0.8             | 11.3             | 83.0  | 7.0             | 34.1             | 177.5 |

Secondary Medical Zone ID: 330

|                 | Male            |                  |       |                 |                  |       | Female          |                  |       |                 |                  |       |
|-----------------|-----------------|------------------|-------|-----------------|------------------|-------|-----------------|------------------|-------|-----------------|------------------|-------|
|                 | Suicide         |                  |       | Suicide         |                  |       | Suicide         |                  |       | Suicide         |                  |       |
|                 | Num<br>per year | Rate<br>/100,000 | × 100 | Num<br>per year | Rate<br>/100,000 | × 100 | Num<br>per year | Rate<br>/100,000 | × 100 | Num<br>per year | Rate<br>/100,000 | × 100 |
|                 |                 |                  |       |                 |                  |       |                 |                  |       |                 |                  |       |
| Total (>10 y/o) | 45–54           | Total (>10 y/o)  | 45–54 |                 |                  |       |                 |                  |       |                 |                  |       |
| 1983–1987       | 25.6            | 45.6             | 177.9 | 6.8             | 82.9             | 163.8 | 18.8            | 22.7             | 193.5 | 2.2             | 21.8             | 126.5 |
| 1988–1992       | 25.2            | 37.2             | 210.6 | 5.0             | 60.2             | 175.4 | 12.8            | 16.0             | 153.2 | 1.4             | 16.5             | 113.2 |
| 1993–1997       | 26.6            | 37.3             | 209.8 | 3.2             | 43.7             | 119.5 | 14.2            | 14.6             | 182.0 | 1.4             | 15.3             | 118.7 |
| 1998–2002       | 29.2            | 47.0             | 170.7 | 6.0             | 73.3             | 131.1 | 15.2            | 16.0             | 167.7 | 2.0             | 19.0             | 126.3 |
| 2003–2007       | 31.0            | 49.3             | 188.9 | 5.6             | 76.9             | 137.5 | 17.0            | 16.3             | 187.3 | 1.4             | 16.0             | 116.6 |
| 2008–2012       | 28.8            | 44.0             | 178.7 | 5.8             | 76.9             | 158.2 | 15.4            | 16.2             | 169.3 | 1.6             | 18.7             | 125.5 |
|                 | 15–24           |                  |       | 55–64           |                  |       | 15–24           |                  |       | 55–64           |                  |       |
| 1983–1987       | 1.2             | 18.4             | 131.8 | 4.8             | 63.2             | 148.7 | 0.4             | 7.1              | 104.2 | 4.6             | 37.2             | 188.7 |
| 1988–1992       | 0.8             | 11.5             | 116.0 | 4.2             | 50.9             | 143.4 | 0.2             | 5.2              | 97.8  | 2.2             | 22.1             | 123.9 |
| 1993–1997       | 1.0             | 13.4             | 118.2 | 4.6             | 56.8             | 141.2 | 0.0             | 4.4              | 83.7  | 3.6             | 28.8             | 181.3 |
| 1998–2002       | 0.6             | 15.3             | 96.9  | 5.4             | 82.9             | 130.4 | 0.2             | 6.7              | 95.1  | 2.0             | 22.4             | 119.1 |
| 2003–2007       | 1.4             | 21.4             | 122.7 | 6.4             | 85.2             | 147.7 | 0.0             | 7.2              | 80.6  | 2.0             | 20.5             | 122.6 |
| 2008–2012       | 0.4             | 19.8             | 93.4  | 6.2             | 66.6             | 137.1 | 0.8             | 12.9             | 132.8 | 1.4             | 16.4             | 110.1 |
|                 | 25–34           |                  |       | 65–74           |                  |       | 25–34           |                  |       | 65–74           |                  |       |
| 1983–1987       | 2.4             | 31.5             | 123.2 | 2.0             | 49.8             | 113.7 | 1.6             | 15.1             | 140.0 | 2.4             | 39.8             | 127.4 |
| 1988–1992       | 2.0             | 27.4             | 143.5 | 3.8             | 61.3             | 173.9 | 0.4             | 8.4              | 96.9  | 4.2             | 50.1             | 192.2 |
| 1993–1997       | 1.6             | 25.3             | 129.6 | 5.4             | 69.2             | 216.8 | 0.4             | 8.5              | 101.7 | 3.0             | 31.9             | 163.8 |
| 1998–2002       | 2.2             | 34.8             | 129.0 | 6.0             | 73.1             | 160.7 | 0.4             | 11.3             | 97.8  | 4.4             | 38.9             | 185.4 |
| 2003–2007       | 0.6             | 26.8             | 86.4  | 5.8             | 73.1             | 170.5 | 1.4             | 17.3             | 133.2 | 4.4             | 35.7             | 191.5 |
| 2008–2012       | 1.6             | 35.4             | 108.5 | 5.0             | 63.7             | 161.1 | 1.0             | 16.6             | 115.7 | 2.6             | 25.0             | 140.4 |
|                 | 35–44           |                  |       | >74 y/o         |                  |       | 35–44           |                  |       | >74 y/o         |                  |       |
| 1983–1987       | 5.2             | 56.6             | 178.0 | 3.0             | 115.2            | 147.1 | 2.4             | 18.6             | 157.3 | 5.2             | 133.1            | 230.6 |
| 1988–1992       | 4.2             | 40.8             | 172.3 | 5.0             | 136.4            | 211.5 | 0.8             | 10.2             | 106.0 | 3.6             | 75.6             | 158.1 |
| 1993–1997       | 4.4             | 45.5             | 185.7 | 6.4             | 142.8            | 274.3 | 1.0             | 10.5             | 123.4 | 4.8             | 74.7             | 217.0 |
| 1998–2002       | 4.4             | 57.8             | 164.0 | 4.6             | 93.5             | 177.4 | 1.0             | 12.3             | 119.3 | 5.0             | 61.9             | 199.4 |
| 2003–2007       | 4.0             | 66.2             | 165.1 | 7.0             | 105.0            | 233.1 | 1.0             | 14.6             | 115.4 | 6.8             | 64.1             | 285.6 |
| 2008–2012       | 2.6             | 45.3             | 121.6 | 7.2             | 89.1             | 214.7 | 0.6             | 13.9             | 102.6 | 7.4             | 53.8             | 279.8 |

Secondary Medical Zone ID: 331

|                 | Male            |                  |       |                 |                  |       | Female          |                  |       |                 |                  |       |
|-----------------|-----------------|------------------|-------|-----------------|------------------|-------|-----------------|------------------|-------|-----------------|------------------|-------|
|                 | Suicide         |                  |       | Suicide         |                  |       | Suicide         |                  |       | Suicide         |                  |       |
|                 | Num<br>per year | Rate<br>/100,000 | × 100 | Num<br>per year | Rate<br>/100,000 | × 100 | Num<br>per year | Rate<br>/100,000 | × 100 | Num<br>per year | Rate<br>/100,000 | × 100 |
|                 |                 |                  |       |                 |                  |       |                 |                  |       |                 |                  |       |
| Total (>10 y/o) | 45–54           | Total (>10 y/o)  | 45–54 |                 |                  |       |                 |                  |       |                 |                  |       |
| 1983–1987       | 88.8            | 35.4             | 110.9 | 20.6            | 55.7             | 110.2 | 43.8            | 14.6             | 94.3  | 7.8             | 18.1             | 104.9 |
| 1988–1992       | 74.2            | 27.4             | 113.1 | 19.0            | 46.8             | 136.4 | 41.0            | 12.3             | 93.5  | 6.2             | 14.5             | 99.2  |
| 1993–1997       | 81.0            | 28.1             | 112.8 | 21.2            | 44.5             | 121.7 | 35.8            | 10.2             | 90.2  | 6.4             | 13.2             | 101.8 |
| 1998–2002       | 113.2           | 37.6             | 104.5 | 31.0            | 61.1             | 109.1 | 37.8            | 10.4             | 79.9  | 6.0             | 12.4             | 82.2  |
| 2003–2007       | 109.0           | 35.7             | 97.6  | 27.8            | 58.9             | 105.3 | 36.2            | 10.8             | 78.1  | 6.8             | 13.4             | 98.1  |
| 2008–2012       | 93.2            | 31.3             | 90.0  | 17.4            | 43.4             | 89.2  | 36.4            | 10.9             | 79.2  | 6.2             | 13.8             | 92.2  |
|                 | 15–24           |                  |       | 55–64           |                  |       | 15–24           |                  |       | 55–64           |                  |       |
| 1983–1987       | 5.4             | 12.5             | 89.4  | 17.4            | 55.1             | 129.7 | 2.8             | 6.1              | 88.7  | 7.8             | 20.1             | 101.8 |
| 1988–1992       | 4.2             | 9.2              | 92.9  | 12.2            | 35.3             | 99.5  | 2.4             | 4.8              | 90.7  | 10.4            | 23.3             | 130.2 |
| 1993–1997       | 5.2             | 10.7             | 94.9  | 13.4            | 38.4             | 95.5  | 3.2             | 5.7              | 109.5 | 6.0             | 14.7             | 92.7  |
| 1998–2002       | 3.8             | 9.9              | 62.4  | 25.2            | 67.2             | 105.8 | 2.6             | 5.6              | 80.4  | 8.8             | 20.3             | 107.9 |
| 2003–2007       | 5.2             | 13.5             | 77.3  | 24.8            | 56.6             | 98.0  | 3.4             | 7.9              | 87.7  | 6.0             | 13.9             | 82.9  |
| 2008–2012       | 5.0             | 15.8             | 74.7  | 24.4            | 49.2             | 101.2 | 1.4             | 5.3              | 54.2  | 7.2             | 14.1             | 94.2  |
|                 | 25–34           |                  |       | 65–74           |                  |       | 25–34           |                  |       | 65–74           |                  |       |
| 1983–1987       | 13.0            | 27.2             | 106.5 | 6.8             | 39.3             | 89.8  | 4.2             | 8.7              | 80.7  | 7.8             | 31.1             | 99.5  |
| 1988–1992       | 9.4             | 22.5             | 117.7 | 7.2             | 34.2             | 97.1  | 4.2             | 8.8              | 101.9 | 6.4             | 21.6             | 82.9  |
| 1993–1997       | 11.6            | 28.1             | 144.1 | 8.0             | 30.6             | 95.8  | 2.8             | 6.8              | 81.9  | 6.6             | 18.6             | 95.2  |
| 1998–2002       | 11.6            | 28.2             | 104.3 | 13.4            | 44.2             | 97.2  | 3.2             | 8.2              | 70.6  | 7.6             | 19.8             | 94.0  |
| 2003–2007       | 12.8            | 30.7             | 99.1  | 14.0            | 44.2             | 103.0 | 4.6             | 10.5             | 80.9  | 5.6             | 15.2             | 81.5  |
| 2008–2012       | 12.8            | 33.1             | 101.7 | 11.6            | 36.0             | 91.0  | 5.0             | 12.1             | 84.4  | 4.6             | 13.5             | 75.7  |
|                 | 35–44           |                  |       | >74 y/o         |                  |       | 35–44           |                  |       | >74 y/o         |                  |       |
| 1983–1987       | 19.0            | 39.0             | 122.4 | 5.8             | 65.8             | 84.0  | 8.0             | 15.0             | 126.8 | 5.4             | 37.0             | 64.1  |
| 1988–1992       | 14.6            | 27.9             | 117.9 | 7.4             | 62.1             | 96.3  | 5.6             | 10.2             | 105.7 | 5.4             | 27.2             | 56.8  |
| 1993–1997       | 15.6            | 31.6             | 128.9 | 5.8             | 42.5             | 81.5  | 5.2             | 9.7              | 114.4 | 5.4             | 21.3             | 61.8  |
| 1998–2002       | 20.2            | 46.1             | 130.9 | 8.0             | 46.3             | 87.9  | 2.4             | 6.5              | 62.7  | 7.0             | 21.3             | 68.6  |
| 2003–2007       | 14.8            | 37.8             | 94.4  | 9.6             | 42.3             | 94.0  | 4.8             | 11.2             | 88.8  | 4.8             | 12.2             | 54.2  |
| 2008–2012       | 11.8            | 30.8             | 82.9  | 10.2            | 37.2             | 89.5  | 5.6             | 12.6             | 93.1  | 6.0             | 12.7             | 65.9  |

Secondary Medical Zone ID: 332

|                 | Male            |                  |       |                 |                  |       | Female          |                  |       |                 |                  |       |
|-----------------|-----------------|------------------|-------|-----------------|------------------|-------|-----------------|------------------|-------|-----------------|------------------|-------|
|                 | Suicide         |                  |       | Suicide         |                  |       | Suicide         |                  |       | Suicide         |                  |       |
|                 | Num<br>per year | Rate<br>/100,000 | × 100 | Num<br>per year | Rate<br>/100,000 | × 100 | Num<br>per year | Rate<br>/100,000 | × 100 | Num<br>per year | Rate<br>/100,000 | × 100 |
|                 |                 |                  |       |                 |                  |       |                 |                  |       |                 |                  |       |
| Total (>10 y/o) | 45–54           | Total (>10 y/o)  | 45–54 |                 |                  |       |                 |                  |       |                 |                  |       |
| 1983–1987       | 33.8            | 38.8             | 131.8 | 6.6             | 56.6             | 111.9 | 21.4            | 17.5             | 120.9 | 4.2             | 24.2             | 140.5 |
| 1988–1992       | 28.8            | 30.7             | 141.1 | 6.6             | 53.3             | 155.3 | 15.8            | 13.0             | 102.0 | 2.0             | 15.8             | 107.9 |
| 1993–1997       | 31.4            | 32.7             | 150.3 | 7.6             | 55.4             | 151.4 | 16.6            | 12.1             | 122.5 | 2.0             | 14.9             | 115.3 |
| 1998–2002       | 32.4            | 39.1             | 115.2 | 6.8             | 56.4             | 100.8 | 14.4            | 12.5             | 101.9 | 1.2             | 13.3             | 88.7  |
| 2003–2007       | 34.4            | 41.1             | 125.7 | 8.8             | 71.9             | 128.5 | 12.8            | 12.4             | 102.9 | 1.8             | 14.7             | 107.2 |
| 2008–2012       | 28.8            | 37.2             | 117.6 | 6.4             | 61.7             | 127.0 | 10.2            | 12.6             | 94.7  | 0.8             | 12.6             | 84.4  |
|                 | 15–24           |                  |       | 55–64           |                  |       | 15–24           |                  |       | 55–64           |                  |       |
| 1983–1987       | 0.8             | 12.2             | 87.7  | 7.2             | 56.0             | 131.8 | 0.6             | 6.8              | 100.1 | 3.4             | 20.7             | 105.0 |
| 1988–1992       | 0.6             | 9.5              | 96.2  | 4.8             | 38.7             | 108.9 | 0.6             | 5.8              | 109.1 | 2.6             | 17.3             | 96.9  |
| 1993–1997       | 1.0             | 12.0             | 106.2 | 5.6             | 46.6             | 115.8 | 0.2             | 4.4              | 84.1  | 3.8             | 22.4             | 140.7 |
| 1998–2002       | 1.2             | 16.1             | 102.1 | 7.2             | 68.9             | 108.5 | 0.4             | 6.4              | 91.0  | 2.0             | 18.3             | 97.1  |
| 2003–2007       | 0.8             | 16.0             | 91.5  | 7.2             | 64.4             | 111.5 | 0.6             | 8.7              | 96.9  | 2.0             | 17.1             | 102.3 |
| 2008–2012       | 1.4             | 22.9             | 107.9 | 6.6             | 51.4             | 105.8 | 1.2             | 12.8             | 131.5 | 1.2             | 13.2             | 88.4  |
|                 | 25–34           |                  |       | 65–74           |                  |       | 25–34           |                  |       | 65–74           |                  |       |
| 1983–1987       | 5.4             | 38.7             | 151.4 | 5.2             | 57.8             | 132.0 | 1.4             | 11.6             | 107.4 | 4.0             | 32.4             | 103.8 |
| 1988–1992       | 1.2             | 16.7             | 87.5  | 4.6             | 46.0             | 130.6 | 1.0             | 9.4              | 108.3 | 4.4             | 30.4             | 116.5 |
| 1993–1997       | 3.2             | 30.9             | 158.1 | 4.4             | 39.8             | 124.8 | 0.4             | 7.5              | 89.8  | 5.0             | 28.9             | 148.2 |
| 1998–2002       | 1.6             | 26.6             | 98.6  | 5.8             | 51.2             | 112.5 | 1.4             | 13.8             | 119.2 | 4.0             | 24.8             | 117.9 |
| 2003–2007       | 2.2             | 32.8             | 105.7 | 6.4             | 56.0             | 130.6 | 0.0             | 9.4              | 71.9  | 3.6             | 23.5             | 126.2 |
| 2008–2012       | 1.0             | 27.3             | 83.8  | 4.6             | 45.4             | 114.9 | 0.2             | 11.4             | 79.3  | 2.4             | 19.6             | 110.2 |
|                 | 35–44           |                  |       | >74 y/o         |                  |       | 35–44           |                  |       | >74 y/o         |                  |       |
| 1983–1987       | 5.2             | 42.0             | 131.9 | 3.4             | 77.1             | 98.5  | 3.2             | 18.4             | 155.7 | 4.6             | 57.2             | 99.2  |
| 1988–1992       | 6.0             | 39.0             | 164.7 | 5.0             | 84.1             | 130.4 | 1.0             | 9.3              | 96.8  | 4.2             | 41.3             | 86.3  |
| 1993–1997       | 4.6             | 34.4             | 140.4 | 4.8             | 70.8             | 136.0 | 1.0             | 8.8              | 102.9 | 4.2             | 33.4             | 97.1  |
| 1998–2002       | 5.2             | 48.4             | 137.6 | 4.6             | 61.0             | 115.8 | 0.4             | 8.2              | 79.1  | 5.0             | 32.7             | 105.5 |
| 2003–2007       | 3.4             | 44.3             | 110.6 | 5.6             | 59.0             | 131.1 | 0.8             | 11.9             | 94.3  | 4.0             | 22.6             | 100.8 |
| 2008–2012       | 3.0             | 40.6             | 109.2 | 5.6             | 52.5             | 126.5 | 0.8             | 13.1             | 96.3  | 3.6             | 18.9             | 98.4  |

Secondary Medical Zone ID: 333

|                 | Male            |                  |       |                 |                  |       | Female          |                  |       |                 |                  |       |
|-----------------|-----------------|------------------|-------|-----------------|------------------|-------|-----------------|------------------|-------|-----------------|------------------|-------|
|                 | Suicide         |                  |       | Suicide         |                  |       | Suicide         |                  |       | Suicide         |                  |       |
|                 | Num<br>per year | Rate<br>/100,000 | × 100 | Num<br>per year | Rate<br>/100,000 | × 100 | Num<br>per year | Rate<br>/100,000 | × 100 | Num<br>per year | Rate<br>/100,000 | × 100 |
|                 |                 |                  |       |                 |                  |       |                 |                  |       |                 |                  |       |
| Total (>10 y/o) | 45–54           | Total (>10 y/o)  | 45–54 |                 |                  |       |                 |                  |       |                 |                  |       |
| 1983–1987       | 28.4            | 41.4             | 142.3 | 9.6             | 92.8             | 183.5 | 14.8            | 16.7             | 117.3 | 2.2             | 19.7             | 114.4 |
| 1988–1992       | 20.8            | 29.0             | 132.3 | 3.8             | 43.3             | 125.9 | 10.2            | 12.5             | 95.3  | 1.0             | 14.0             | 95.5  |
| 1993–1997       | 24.6            | 31.9             | 147.6 | 5.2             | 48.9             | 133.8 | 11.8            | 12.1             | 118.9 | 2.0             | 16.4             | 126.8 |
| 1998–2002       | 25.8            | 39.0             | 114.3 | 7.0             | 66.5             | 118.9 | 12.0            | 13.5             | 109.8 | 2.0             | 17.4             | 115.7 |
| 2003–2007       | 29.0            | 42.2             | 128.9 | 4.8             | 54.5             | 97.5  | 7.4             | 11.5             | 86.8  | 1.0             | 13.0             | 95.0  |
| 2008–2012       | 23.0            | 36.0             | 112.4 | 3.4             | 46.2             | 95.0  | 9.8             | 12.9             | 105.4 | 1.6             | 16.8             | 112.5 |
|                 | 15–24           |                  |       | 55–64           |                  |       | 15–24           |                  |       | 55–64           |                  |       |
| 1983–1987       | 1.2             | 15.4             | 110.4 | 5.8             | 57.5             | 135.2 | 0.4             | 6.5              | 95.7  | 3.0             | 23.4             | 118.7 |
| 1988–1992       | 0.4             | 9.0              | 91.1  | 3.2             | 36.3             | 102.3 | 0.6             | 6.2              | 116.7 | 1.8             | 17.4             | 97.2  |
| 1993–1997       | 1.0             | 12.1             | 107.4 | 5.8             | 57.5             | 142.9 | 0.2             | 4.7              | 89.8  | 3.4             | 24.5             | 154.1 |
| 1998–2002       | 1.0             | 15.4             | 97.6  | 5.4             | 69.7             | 109.7 | 0.6             | 7.5              | 106.5 | 2.4             | 22.1             | 117.6 |
| 2003–2007       | 1.2             | 18.1             | 104.0 | 8.0             | 81.9             | 141.8 | 0.8             | 10.2             | 113.3 | 0.6             | 13.9             | 82.8  |
| 2008–2012       | 1.4             | 22.8             | 107.7 | 6.4             | 57.9             | 119.2 | 0.2             | 8.1              | 83.1  | 2.0             | 17.0             | 114.1 |
|                 | 25–34           |                  |       | 65–74           |                  |       | 25–34           |                  |       | 65–74           |                  |       |
| 1983–1987       | 3.8             | 34.3             | 134.3 | 2.4             | 42.6             | 97.4  | 1.2             | 11.8             | 109.6 | 2.6             | 31.4             | 100.5 |
| 1988–1992       | 1.0             | 16.1             | 84.3  | 3.6             | 46.7             | 132.5 | 0.6             | 8.3              | 95.9  | 4.0             | 36.7             | 140.6 |
| 1993–1997       | 1.8             | 22.1             | 113.3 | 3.4             | 40.0             | 125.3 | 1.0             | 9.8              | 117.7 | 1.8             | 18.2             | 93.2  |
| 1998–2002       | 1.6             | 25.9             | 95.9  | 3.2             | 43.2             | 95.0  | 0.2             | 9.3              | 80.6  | 3.2             | 26.2             | 124.5 |
| 2003–2007       | 3.2             | 38.3             | 123.4 | 4.2             | 51.6             | 120.2 | 0.4             | 11.0             | 84.8  | 1.4             | 17.1             | 92.1  |
| 2008–2012       | 2.6             | 35.7             | 109.5 | 3.0             | 42.3             | 107.1 | 0.6             | 13.1             | 91.4  | 2.2             | 21.2             | 119.1 |
|                 | 35–44           |                  |       | >74 y/o         |                  |       | 35–44           |                  |       | >74 y/o         |                  |       |
| 1983–1987       | 2.8             | 32.8             | 103.1 | 2.8             | 81.5             | 104.1 | 0.6             | 10.5             | 88.7  | 4.8             | 81.3             | 140.8 |
| 1988–1992       | 5.4             | 41.2             | 174.0 | 3.4             | 77.5             | 120.2 | 0.8             | 9.5              | 98.0  | 1.4             | 25.8             | 53.9  |
| 1993–1997       | 4.8             | 40.4             | 164.6 | 2.2             | 49.1             | 94.3  | 0.6             | 8.0              | 93.6  | 2.8             | 32.7             | 94.9  |
| 1998–2002       | 4.0             | 43.6             | 123.7 | 3.6             | 61.0             | 115.8 | 1.4             | 12.7             | 122.5 | 2.2             | 23.2             | 74.8  |
| 2003–2007       | 4.4             | 53.6             | 133.7 | 3.2             | 47.5             | 105.6 | 0.2             | 9.9              | 78.2  | 3.0             | 23.7             | 105.4 |
| 2008–2012       | 2.2             | 36.0             | 96.7  | 4.0             | 49.5             | 119.3 | 0.4             | 11.7             | 85.9  | 2.8             | 20.0             | 104.2 |

Secondary Medical Zone ID: 334

|           | Male            |          |       |          |          |       | Female          |          |       |          |          |       |
|-----------|-----------------|----------|-------|----------|----------|-------|-----------------|----------|-------|----------|----------|-------|
|           | Suicide         |          |       | Suicide  |          |       | Suicide         |          |       | Suicide  |          |       |
|           | Num             | Rate     | × 100 | Num      | Rate     | × 100 | Num             | Rate     | × 100 | Num      | Rate     | × 100 |
|           | per year        | /100,000 |       | per year | /100,000 |       | per year        | /100,000 |       | per year | /100,000 |       |
|           | Total (>10 y/o) |          |       | 45–54    |          |       | Total (>10 y/o) |          |       | 45–54    |          |       |
| 1983–1987 | 18.6            | 37.5     | 128.5 | 5.2      | 67.2     | 132.8 | 11.0            | 16.9     | 119.2 | 2.2      | 21.4     | 124.1 |
| 1988–1992 | 12.0            | 25.9     | 108.3 | 4.2      | 52.0     | 151.5 | 8.4             | 12.8     | 104.7 | 1.0      | 14.8     | 101.4 |
| 1993–1997 | 11.8            | 25.5     | 104.0 | 2.6      | 38.7     | 105.8 | 7.4             | 11.1     | 106.2 | 0.6      | 12.1     | 93.4  |
| 1998–2002 | 17.6            | 37.1     | 107.0 | 6.8      | 78.2     | 139.7 | 7.4             | 12.4     | 98.1  | 1.0      | 15.0     | 99.5  |
| 2003–2007 | 19.8            | 39.8     | 119.5 | 4.4      | 63.4     | 113.4 | 7.4             | 12.7     | 103.3 | 0.8      | 13.3     | 97.3  |
| 2008–2012 | 18.4            | 37.3     | 119.7 | 3.4      | 54.1     | 111.2 | 6.2             | 12.4     | 97.5  | 0.6      | 13.8     | 92.4  |
|           | 15–24           |          |       | 55–64    |          |       | 15–24           |          |       | 55–64    |          |       |
| 1983–1987 | 0.4             | 12.2     | 87.6  | 3.0      | 45.7     | 107.5 | 0.4             | 7.0      | 102.6 | 0.8      | 15.8     | 80.0  |
| 1988–1992 | 0.4             | 9.7      | 98.2  | 1.8      | 30.9     | 87.1  | 0.0             | 4.2      | 79.7  | 2.6      | 23.1     | 129.6 |
| 1993–1997 | 0.6             | 11.6     | 102.8 | 2.2      | 37.8     | 93.8  | 0.0             | 4.2      | 80.3  | 1.6      | 18.0     | 113.0 |
| 1998–2002 | 0.6             | 15.3     | 96.8  | 2.2      | 50.7     | 79.9  | 0.4             | 7.2      | 103.1 | 0.8      | 16.9     | 90.0  |
| 2003–2007 | 0.6             | 16.9     | 97.0  | 3.8      | 59.9     | 103.8 | 0.4             | 9.0      | 100.3 | 1.2      | 17.2     | 102.6 |
| 2008–2012 | 0.8             | 21.6     | 101.9 | 4.4      | 55.0     | 113.1 | 0.0             | 7.6      | 78.0  | 0.6      | 13.3     | 89.4  |
|           | 25–34           |          |       | 65–74    |          |       | 25–34           |          |       | 65–74    |          |       |
| 1983–1987 | 2.4             | 31.2     | 122.2 | 2.0      | 47.2     | 107.8 | 0.8             | 11.2     | 104.0 | 3.0      | 42.5     | 135.9 |
| 1988–1992 | 0.4             | 14.6     | 76.6  | 1.8      | 37.6     | 106.6 | 0.4             | 8.3      | 95.7  | 0.8      | 18.5     | 71.1  |
| 1993–1997 | 0.0             | 13.4     | 68.4  | 1.4      | 28.9     | 90.5  | 0.8             | 9.8      | 117.7 | 1.8      | 21.9     | 112.5 |
| 1998–2002 | 0.6             | 22.8     | 84.6  | 3.2      | 48.9     | 107.6 | 0.2             | 10.1     | 86.8  | 2.6      | 26.7     | 127.2 |
| 2003–2007 | 1.8             | 33.5     | 108.0 | 3.0      | 47.0     | 109.7 | 1.0             | 14.7     | 113.2 | 1.0      | 16.8     | 90.2  |
| 2008–2012 | 1.0             | 30.6     | 93.9  | 2.4      | 42.1     | 106.5 | 0.6             | 14.3     | 99.7  | 1.4      | 19.1     | 107.3 |
|           | 35–44           |          |       | >74 y/o  |          |       | 35–44           |          |       | >74 y/o  |          |       |
| 1983–1987 | 4.0             | 46.6     | 146.5 | 1.6      | 74.2     | 94.7  | 1.0             | 12.9     | 108.9 | 2.8      | 71.2     | 123.5 |
| 1988–1992 | 1.6             | 23.7     | 100.1 | 1.6      | 60.6     | 93.9  | 0.8             | 10.2     | 105.4 | 2.8      | 54.8     | 114.6 |
| 1993–1997 | 2.4             | 30.4     | 123.9 | 2.4      | 65.6     | 125.9 | 0.8             | 9.5      | 112.0 | 1.8      | 31.7     | 92.2  |
| 1998–2002 | 2.0             | 35.1     | 99.6  | 2.0      | 53.6     | 101.6 | 0.6             | 10.3     | 100.1 | 1.8      | 26.8     | 86.3  |
| 2003–2007 | 2.8             | 47.8     | 119.2 | 3.4      | 60.4     | 134.0 | 0.6             | 12.4     | 98.0  | 2.4      | 25.8     | 114.9 |
| 2008–2012 | 3.2             | 46.1     | 124.0 | 3.2      | 50.2     | 121.1 | 0.4             | 12.5     | 92.3  | 2.4      | 22.2     | 115.6 |

Secondary Medical Zone ID: 335

|           | Male            |                  |       |                 |                  |       | Female          |                  |       |                 |                  |       |
|-----------|-----------------|------------------|-------|-----------------|------------------|-------|-----------------|------------------|-------|-----------------|------------------|-------|
|           | Suicide         |                  |       | Suicide         |                  |       | Suicide         |                  |       | Suicide         |                  |       |
|           | Num<br>per year | Rate<br>/100,000 | × 100 | Num<br>per year | Rate<br>/100,000 | × 100 | Num<br>per year | Rate<br>/100,000 | × 100 | Num<br>per year | Rate<br>/100,000 | × 100 |
|           |                 |                  |       |                 |                  |       |                 |                  |       |                 |                  |       |
|           | Total (>10 y/o) |                  |       | 45–54           |                  |       | Total (>10 y/o) |                  |       | 45–54           |                  |       |
| 1983–1987 | 41.0            | 39.7             | 132.6 | 9.6             | 66.1             | 130.8 | 24.2            | 17.8             | 124.4 | 3.6             | 20.3             | 117.9 |
| 1988–1992 | 32.8            | 28.3             | 126.5 | 6.6             | 45.4             | 132.1 | 22.2            | 14.5             | 120.9 | 3.6             | 19.2             | 131.1 |
| 1993–1997 | 39.2            | 31.3             | 138.6 | 7.6             | 45.0             | 123.0 | 21.2            | 12.5             | 127.9 | 2.4             | 14.2             | 110.1 |
| 1998–2002 | 51.2            | 40.7             | 123.6 | 11.6            | 63.5             | 113.5 | 23.8            | 14.0             | 122.7 | 4.6             | 20.6             | 136.9 |
| 2003–2007 | 55.8            | 43.4             | 132.5 | 14.6            | 80.6             | 144.0 | 23.8            | 14.1             | 127.4 | 3.8             | 17.8             | 130.1 |
| 2008–2012 | 43.0            | 35.8             | 110.8 | 9.6             | 59.1             | 121.6 | 17.8            | 12.8             | 103.0 | 2.8             | 16.3             | 109.4 |
|           | 15–24           |                  |       | 55–64           |                  |       | 15–24           |                  |       | 55–64           |                  |       |
| 1983–1987 | 2.2             | 16.3             | 116.9 | 6.6             | 47.6             | 111.9 | 1.4             | 8.4              | 123.3 | 4.6             | 24.0             | 121.8 |
| 1988–1992 | 0.6             | 7.5              | 75.3  | 7.2             | 45.2             | 127.4 | 0.0             | 3.2              | 61.0  | 5.8             | 26.6             | 148.7 |
| 1993–1997 | 1.6             | 10.8             | 95.2  | 7.8             | 50.7             | 125.9 | 0.8             | 5.3              | 102.2 | 6.2             | 28.5             | 179.4 |
| 1998–2002 | 2.0             | 14.0             | 88.9  | 10.4            | 73.4             | 115.6 | 0.4             | 5.4              | 76.3  | 3.6             | 21.2             | 112.5 |
| 2003–2007 | 1.6             | 14.6             | 83.4  | 12.0            | 72.1             | 124.9 | 0.4             | 6.2              | 69.1  | 3.8             | 19.8             | 118.5 |
| 2008–2012 | 1.4             | 16.8             | 79.1  | 12.2            | 61.2             | 126.0 | 0.4             | 6.9              | 70.8  | 1.2             | 11.1             | 74.5  |
|           | 25–34           |                  |       | 65–74           |                  |       | 25–34           |                  |       | 65–74           |                  |       |
| 1983–1987 | 5.6             | 34.2             | 133.7 | 5.2             | 53.9             | 123.1 | 3.4             | 16.7             | 154.9 | 4.0             | 32.4             | 103.6 |
| 1988–1992 | 2.0             | 16.8             | 87.7  | 6.2             | 52.0             | 147.5 | 2.0             | 11.1             | 127.9 | 3.6             | 25.1             | 96.1  |
| 1993–1997 | 4.4             | 27.9             | 142.7 | 5.4             | 40.4             | 126.7 | 0.8             | 7.3              | 88.2  | 5.0             | 27.0             | 138.8 |
| 1998–2002 | 3.0             | 24.6             | 91.2  | 9.2             | 60.8             | 133.8 | 2.0             | 12.7             | 110.0 | 4.2             | 23.4             | 111.5 |
| 2003–2007 | 4.6             | 32.6             | 105.1 | 9.8             | 64.8             | 151.0 | 1.8             | 12.9             | 99.3  | 4.4             | 23.7             | 127.5 |
| 2008–2012 | 3.4             | 29.4             | 90.3  | 4.8             | 38.9             | 98.5  | 2.2             | 15.2             | 106.1 | 3.2             | 19.7             | 110.9 |
|           | 35–44           |                  |       | >74 y/o         |                  |       | 35–44           |                  |       | >74 y/o         |                  |       |
| 1983–1987 | 7.0             | 43.1             | 135.5 | 4.6             | 89.7             | 114.5 | 1.8             | 12.2             | 103.3 | 5.4             | 67.3             | 116.6 |
| 1988–1992 | 4.4             | 25.6             | 107.8 | 5.6             | 83.1             | 128.8 | 2.4             | 11.9             | 122.9 | 4.8             | 45.2             | 94.4  |
| 1993–1997 | 5.6             | 31.1             | 127.0 | 6.4             | 78.8             | 151.3 | 1.2             | 7.9              | 93.3  | 4.8             | 35.3             | 102.7 |
| 1998–2002 | 7.4             | 45.2             | 128.3 | 7.4             | 75.7             | 143.7 | 1.6             | 10.3             | 99.7  | 7.4             | 42.1             | 135.7 |
| 2003–2007 | 6.2             | 43.8             | 109.4 | 6.8             | 58.1             | 129.0 | 2.0             | 13.1             | 103.7 | 7.4             | 34.5             | 153.9 |
| 2008–2012 | 5.0             | 36.8             | 99.0  | 6.6             | 49.3             | 118.9 | 2.4             | 14.8             | 109.2 | 5.6             | 23.5             | 122.2 |



Secondary Medical Zone ID: 336

|                 | Male            |                  |       |                 |                  |       | Female          |                  |       |                 |                  |       |
|-----------------|-----------------|------------------|-------|-----------------|------------------|-------|-----------------|------------------|-------|-----------------|------------------|-------|
|                 | Suicide         |                  |       | Suicide         |                  |       | Suicide         |                  |       | Suicide         |                  |       |
|                 | Num<br>per year | Rate<br>/100,000 | × 100 | Num<br>per year | Rate<br>/100,000 | × 100 | Num<br>per year | Rate<br>/100,000 | × 100 | Num<br>per year | Rate<br>/100,000 | × 100 |
|                 |                 |                  |       |                 |                  |       |                 |                  |       |                 |                  |       |
| Total (>10 y/o) | 45–54           | Total (>10 y/o)  | 45–54 |                 |                  |       |                 |                  |       |                 |                  |       |
| 1983–1987       | 22.4            | 40.2             | 141.8 | 5.6             | 63.8             | 126.1 | 13.8            | 18.5             | 137.3 | 2.2             | 20.3             | 117.7 |
| 1988–1992       | 21.8            | 33.2             | 169.4 | 4.8             | 54.7             | 159.3 | 9.6             | 13.5             | 113.3 | 1.0             | 14.5             | 99.1  |
| 1993–1997       | 18.4            | 29.7             | 141.9 | 3.6             | 44.8             | 122.4 | 7.6             | 11.0             | 106.9 | 2.0             | 17.5             | 135.6 |
| 1998–2002       | 25.0            | 42.8             | 137.4 | 6.4             | 72.4             | 129.3 | 13.4            | 15.0             | 143.5 | 1.4             | 16.5             | 109.4 |
| 2003–2007       | 29.0            | 45.4             | 163.0 | 5.8             | 73.1             | 130.7 | 12.6            | 14.4             | 143.7 | 1.8             | 17.2             | 125.5 |
| 2008–2012       | 25.8            | 41.2             | 153.9 | 4.6             | 63.2             | 130.0 | 9.4             | 14.2             | 120.8 | 0.6             | 13.7             | 91.9  |
|                 | 15–24           |                  |       | 55–64           |                  |       | 15–24           |                  |       | 55–64           |                  |       |
| 1983–1987       | 1.0             | 16.4             | 117.5 | 4.8             | 58.1             | 136.8 | 0.6             | 7.8              | 114.8 | 1.6             | 19.5             | 98.7  |
| 1988–1992       | 0.2             | 9.1              | 92.3  | 4.6             | 49.4             | 139.0 | 0.2             | 5.2              | 97.8  | 2.2             | 20.7             | 115.6 |
| 1993–1997       | 0.8             | 12.7             | 112.7 | 4.8             | 53.0             | 131.7 | 0.2             | 5.1              | 98.2  | 1.4             | 16.2             | 101.8 |
| 1998–2002       | 1.8             | 21.5             | 135.9 | 5.8             | 79.8             | 125.5 | 0.6             | 8.1              | 115.8 | 2.2             | 22.4             | 119.0 |
| 2003–2007       | 1.8             | 23.4             | 134.0 | 6.4             | 81.0             | 140.3 | 0.0             | 7.1              | 78.4  | 1.8             | 19.5             | 116.4 |
| 2008–2012       | 0.4             | 19.7             | 93.1  | 6.8             | 67.6             | 139.1 | 0.8             | 12.6             | 129.6 | 1.8             | 17.6             | 118.1 |
|                 | 25–34           |                  |       | 65–74           |                  |       | 25–34           |                  |       | 65–74           |                  |       |
| 1983–1987       | 3.0             | 33.9             | 132.4 | 1.4             | 39.1             | 89.3  | 1.2             | 13.0             | 120.4 | 4.0             | 50.9             | 162.8 |
| 1988–1992       | 2.2             | 27.9             | 145.9 | 2.8             | 47.2             | 133.9 | 0.6             | 9.1              | 105.0 | 3.6             | 41.5             | 159.2 |
| 1993–1997       | 0.8             | 19.3             | 98.8  | 2.8             | 40.8             | 127.8 | 0.0             | 6.7              | 80.9  | 1.4             | 18.8             | 96.3  |
| 1998–2002       | 1.8             | 31.8             | 117.8 | 2.8             | 43.5             | 95.7  | 0.4             | 11.3             | 97.6  | 2.6             | 25.9             | 123.2 |
| 2003–2007       | 2.2             | 38.6             | 124.6 | 6.0             | 68.1             | 158.7 | 0.6             | 13.5             | 103.7 | 3.0             | 26.2             | 141.0 |
| 2008–2012       | 2.2             | 38.8             | 119.1 | 4.4             | 56.1             | 142.1 | 1.0             | 16.5             | 115.3 | 2.2             | 22.4             | 125.7 |
|                 | 35–44           |                  |       | >74 y/o         |                  |       | 35–44           |                  |       | >74 y/o         |                  |       |
| 1983–1987       | 5.2             | 54.9             | 172.6 | 1.2             | 65.6             | 83.8  | 0.8             | 12.0             | 102.0 | 3.4             | 83.0             | 143.9 |
| 1988–1992       | 2.8             | 30.6             | 128.9 | 4.4             | 117.0            | 181.4 | 0.6             | 9.5              | 97.9  | 1.4             | 35.1             | 73.3  |
| 1993–1997       | 2.6             | 30.8             | 125.7 | 3.0             | 75.6             | 145.2 | 0.2             | 7.0              | 82.0  | 2.4             | 39.2             | 113.9 |
| 1998–2002       | 3.2             | 45.0             | 127.9 | 3.2             | 69.4             | 131.7 | 1.2             | 13.0             | 125.4 | 5.0             | 57.3             | 184.6 |
| 2003–2007       | 1.6             | 38.0             | 94.8  | 5.2             | 79.4             | 176.3 | 0.8             | 13.5             | 107.0 | 4.6             | 42.6             | 189.7 |
| 2008–2012       | 2.0             | 40.7             | 109.5 | 5.4             | 68.3             | 164.5 | 0.4             | 13.0             | 95.7  | 2.6             | 23.0             | 119.7 |

Secondary Medical Zone ID: 337

|           | Male            |          |       |          |          |       | Female          |          |       |          |          |       |
|-----------|-----------------|----------|-------|----------|----------|-------|-----------------|----------|-------|----------|----------|-------|
|           | Suicide         |          |       | Suicide  |          |       | Suicide         |          |       | Suicide  |          |       |
|           | Num             | Rate     | × 100 | Num      | Rate     | × 100 | Num             | Rate     | × 100 | Num      | Rate     | × 100 |
|           | per year        | /100,000 |       | per year | /100,000 |       | per year        | /100,000 |       | per year | /100,000 |       |
|           | Total (>10 y/o) |          |       | 45–54    |          |       | Total (>10 y/o) |          |       | 45–54    |          |       |
| 1983–1987 | 33.8            | 39.3     | 131.4 | 7.2      | 56.4     | 111.5 | 16.6            | 15.8     | 106.9 | 3.4      | 20.7     | 120.0 |
| 1988–1992 | 24.8            | 28.2     | 122.4 | 6.6      | 51.7     | 150.4 | 16.2            | 13.6     | 112.6 | 2.0      | 15.5     | 105.9 |
| 1993–1997 | 26.8            | 29.2     | 126.7 | 5.0      | 41.2     | 112.5 | 11.4            | 10.9     | 96.5  | 3.2      | 18.7     | 144.5 |
| 1998–2002 | 36.6            | 41.0     | 121.3 | 9.4      | 68.3     | 122.1 | 10.2            | 11.5     | 82.0  | 1.6      | 14.4     | 95.6  |
| 2003–2007 | 39.6            | 43.7     | 131.8 | 11.2     | 82.2     | 147.0 | 11.8            | 11.9     | 96.5  | 1.4      | 13.0     | 94.7  |
| 2008–2012 | 30.4            | 35.5     | 112.2 | 6.8      | 57.7     | 118.8 | 11.2            | 12.6     | 96.9  | 1.4      | 14.2     | 95.2  |
|           | 15–24           |          |       | 55–64    |          |       | 15–24           |          |       | 55–64    |          |       |
| 1983–1987 | 1.8             | 17.6     | 126.0 | 5.6      | 46.8     | 110.1 | 0.6             | 6.7      | 97.6  | 4.0      | 24.6     | 124.9 |
| 1988–1992 | 1.2             | 11.2     | 113.3 | 4.4      | 34.9     | 98.3  | 0.4             | 5.0      | 95.4  | 3.8      | 22.1     | 123.9 |
| 1993–1997 | 0.2             | 8.6      | 75.8  | 6.4      | 49.1     | 122.0 | 0.2             | 4.4      | 83.8  | 2.6      | 17.5     | 110.2 |
| 1998–2002 | 2.0             | 18.4     | 116.6 | 6.4      | 63.2     | 99.4  | 0.6             | 7.0      | 99.9  | 1.4      | 16.0     | 84.8  |
| 2003–2007 | 1.8             | 19.3     | 110.5 | 7.8      | 67.1     | 116.3 | 0.6             | 8.5      | 94.4  | 1.6      | 15.8     | 94.4  |
| 2008–2012 | 0.8             | 18.1     | 85.1  | 8.4      | 59.1     | 121.6 | 0.4             | 8.5      | 87.9  | 1.8      | 14.9     | 99.7  |
|           | 25–34           |          |       | 65–74    |          |       | 25–34           |          |       | 65–74    |          |       |
| 1983–1987 | 4.8             | 34.8     | 136.1 | 5.6      | 66.6     | 152.1 | 1.2             | 10.4     | 97.1  | 3.2      | 32.2     | 103.2 |
| 1988–1992 | 2.6             | 23.2     | 121.4 | 3.4      | 39.7     | 112.7 | 0.8             | 8.2      | 95.1  | 2.8      | 24.9     | 95.4  |
| 1993–1997 | 3.4             | 29.0     | 148.3 | 4.6      | 41.3     | 129.6 | 0.8             | 8.4      | 100.5 | 2.2      | 17.8     | 91.2  |
| 1998–2002 | 3.0             | 31.0     | 114.9 | 5.6      | 48.0     | 105.6 | 0.6             | 10.0     | 86.4  | 2.6      | 19.7     | 93.7  |
| 2003–2007 | 2.8             | 32.2     | 103.9 | 7.2      | 58.6     | 136.6 | 0.4             | 10.1     | 78.0  | 3.2      | 21.6     | 116.2 |
| 2008–2012 | 1.8             | 28.4     | 87.2  | 4.6      | 45.5     | 115.2 | 1.2             | 14.4     | 100.3 | 1.6      | 16.4     | 92.1  |
|           | 35–44           |          |       | >74 y/o  |          |       | 35–44           |          |       | >74 y/o  |          |       |
| 1983–1987 | 5.0             | 39.7     | 124.7 | 3.8      | 91.2     | 116.4 | 1.4             | 12.0     | 101.9 | 2.8      | 46.1     | 79.9  |
| 1988–1992 | 2.6             | 21.9     | 92.2  | 4.0      | 79.3     | 122.9 | 1.6             | 10.9     | 112.7 | 4.8      | 55.7     | 116.3 |
| 1993–1997 | 4.6             | 32.6     | 133.0 | 2.6      | 50.0     | 96.1  | 1.0             | 8.5      | 99.5  | 1.4      | 17.8     | 51.6  |
| 1998–2002 | 6.2             | 49.3     | 139.9 | 3.8      | 56.7     | 107.5 | 1.0             | 9.9      | 96.0  | 2.4      | 21.5     | 69.3  |
| 2003–2007 | 4.8             | 49.0     | 122.2 | 4.0      | 46.3     | 102.9 | 0.6             | 10.5     | 82.8  | 4.0      | 25.5     | 113.6 |
| 2008–2012 | 2.2             | 33.1     | 88.9  | 5.8      | 51.3     | 123.7 | 1.2             | 13.6     | 100.0 | 3.6      | 20.2     | 105.0 |

Secondary Medical Zone ID: 338

|           | Male            |                  |       |                 |                  |       | Female          |                  |       |                 |                  |       |
|-----------|-----------------|------------------|-------|-----------------|------------------|-------|-----------------|------------------|-------|-----------------|------------------|-------|
|           | Suicide         |                  |       | Suicide         |                  |       | Suicide         |                  |       | Suicide         |                  |       |
|           | Num<br>per year | Rate<br>/100,000 | × 100 | Num<br>per year | Rate<br>/100,000 | × 100 | Num<br>per year | Rate<br>/100,000 | × 100 | Num<br>per year | Rate<br>/100,000 | × 100 |
|           |                 |                  |       |                 |                  |       |                 |                  |       |                 |                  |       |
|           | Total (>10 y/o) |                  |       | 45–54           |                  |       | Total (>10 y/o) |                  |       | 45–54           |                  |       |
| 1983–1987 | 12.6            | 38.1             | 139.8 | 3.2             | 62.9             | 124.4 | 4.2             | 14.7             | 95.8  | 0.8             | 17.5             | 101.3 |
| 1988–1992 | 11.0            | 30.1             | 153.2 | 3.4             | 56.7             | 165.2 | 4.2             | 12.7             | 102.5 | 0.4             | 14.0             | 95.8  |
| 1993–1997 | 7.0             | 26.2             | 109.8 | 0.8             | 33.3             | 91.1  | 2.2             | 10.0             | 83.6  | 0.2             | 11.9             | 92.0  |
| 1998–2002 | 9.2             | 37.2             | 104.2 | 2.2             | 56.5             | 101.0 | 2.6             | 12.0             | 86.5  | 1.0             | 17.1             | 113.6 |
| 2003–2007 | 13.0            | 41.0             | 135.8 | 2.2             | 57.0             | 101.9 | 4.6             | 13.1             | 111.9 | 0.6             | 14.3             | 104.4 |
| 2008–2012 | 11.8            | 37.1             | 128.7 | 2.6             | 58.7             | 120.8 | 3.4             | 12.9             | 101.3 | 0.0             | 12.6             | 84.7  |
|           | 15–24           |                  |       | 55–64           |                  |       | 15–24           |                  |       | 55–64           |                  |       |
| 1983–1987 | 1.0             | 19.3             | 138.3 | 2.0             | 47.3             | 111.3 | 0.4             | 7.7              | 113.1 | 1.0             | 20.9             | 106.1 |
| 1988–1992 | 0.2             | 10.0             | 100.5 | 1.6             | 37.5             | 105.5 | 0.4             | 6.5              | 122.6 | 1.2             | 20.3             | 113.9 |
| 1993–1997 | 0.0             | 10.3             | 91.4  | 2.0             | 45.3             | 112.5 | 0.2             | 5.6              | 107.9 | 0.0             | 11.9             | 75.1  |
| 1998–2002 | 0.0             | 14.1             | 89.2  | 2.6             | 70.8             | 111.5 | 0.2             | 7.3              | 104.2 | 0.6             | 18.4             | 98.0  |
| 2003–2007 | 0.4             | 18.1             | 103.8 | 3.2             | 72.7             | 125.9 | 0.4             | 10.5             | 117.1 | 1.4             | 20.4             | 121.7 |
| 2008–2012 | 0.0             | 19.4             | 91.3  | 3.0             | 57.1             | 117.6 | 0.0             | 8.9              | 91.6  | 0.6             | 15.2             | 101.8 |
|           | 25–34           |                  |       | 65–74           |                  |       | 25–34           |                  |       | 65–74           |                  |       |
| 1983–1987 | 1.4             | 29.4             | 114.9 | 1.2             | 48.3             | 110.4 | 0.4             | 10.8             | 100.3 | 0.6             | 27.7             | 88.8  |
| 1988–1992 | 2.2             | 33.9             | 177.3 | 0.8             | 34.7             | 98.6  | 0.6             | 10.3             | 118.3 | 0.8             | 25.6             | 98.0  |
| 1993–1997 | 0.8             | 22.1             | 113.2 | 0.6             | 27.6             | 86.4  | 0.0             | 7.4              | 88.8  | 0.4             | 16.5             | 84.7  |
| 1998–2002 | 0.2             | 24.1             | 89.3  | 1.4             | 44.0             | 96.8  | 0.0             | 10.4             | 89.7  | 0.2             | 16.2             | 77.2  |
| 2003–2007 | 1.2             | 35.6             | 114.7 | 2.0             | 49.9             | 116.4 | 0.0             | 11.6             | 88.9  | 0.6             | 17.8             | 95.7  |
| 2008–2012 | 1.0             | 34.9             | 107.2 | 2.4             | 51.6             | 130.6 | 0.2             | 13.9             | 97.0  | 1.0             | 19.8             | 111.4 |
|           | 35–44           |                  |       | >74 y/o         |                  |       | 35–44           |                  |       | >74 y/o         |                  |       |
| 1983–1987 | 2.2             | 41.6             | 130.7 | 1.6             | 99.3             | 126.8 | 0.6             | 12.6             | 107.1 | 0.4             | 37.8             | 65.5  |
| 1988–1992 | 1.2             | 26.2             | 110.3 | 1.6             | 84.1             | 130.3 | 0.2             | 9.1              | 94.2  | 0.6             | 35.7             | 74.5  |
| 1993–1997 | 1.4             | 29.0             | 118.2 | 1.2             | 62.0             | 119.0 | 0.4             | 9.0              | 106.1 | 1.0             | 34.8             | 101.0 |
| 1998–2002 | 2.4             | 48.0             | 136.2 | 0.4             | 41.3             | 78.4  | 0.2             | 9.8              | 94.6  | 0.4             | 20.7             | 66.7  |
| 2003–2007 | 2.2             | 54.1             | 134.9 | 1.8             | 56.2             | 124.7 | 0.2             | 12.0             | 95.2  | 1.4             | 27.7             | 123.6 |
| 2008–2012 | 0.8             | 36.4             | 97.8  | 2.0             | 51.4             | 123.9 | 0.8             | 15.6             | 115.0 | 0.8             | 18.1             | 94.3  |

Secondary Medical Zone ID: 339

|                 | Male            |                  |       |                 |                  |       | Female          |                  |       |                 |                  |       |
|-----------------|-----------------|------------------|-------|-----------------|------------------|-------|-----------------|------------------|-------|-----------------|------------------|-------|
|                 | Suicide         |                  |       | Suicide         |                  |       | Suicide         |                  |       | Suicide         |                  |       |
|                 | Num<br>per year | Rate<br>/100,000 | × 100 | Num<br>per year | Rate<br>/100,000 | × 100 | Num<br>per year | Rate<br>/100,000 | × 100 | Num<br>per year | Rate<br>/100,000 | × 100 |
|                 |                 |                  |       |                 |                  |       |                 |                  |       |                 |                  |       |
| Total (>10 y/o) | 45–54           | Total (>10 y/o)  | 45–54 |                 |                  |       |                 |                  |       |                 |                  |       |
| 1983–1987       | 26.0            | 38.3             | 127.6 | 6.6             | 65.6             | 129.7 | 10.2            | 14.0             | 85.0  | 1.4             | 16.3             | 94.3  |
| 1988–1992       | 25.0            | 32.4             | 153.1 | 3.0             | 36.6             | 106.5 | 10.6            | 12.9             | 95.3  | 0.8             | 13.3             | 90.8  |
| 1993–1997       | 23.6            | 31.4             | 142.4 | 5.0             | 47.7             | 130.5 | 7.4             | 10.3             | 85.6  | 0.4             | 10.6             | 82.2  |
| 1998–2002       | 31.4            | 43.3             | 134.5 | 8.2             | 71.7             | 128.2 | 9.2             | 12.7             | 93.2  | 1.8             | 16.7             | 111.0 |
| 2003–2007       | 34.8            | 44.8             | 150.0 | 5.8             | 56.1             | 100.3 | 8.2             | 12.5             | 93.8  | 1.8             | 15.7             | 114.8 |
| 2008–2012       | 29.8            | 41.5             | 138.7 | 7.8             | 71.0             | 146.0 | 8.0             | 12.9             | 97.5  | 1.0             | 14.2             | 95.2  |
|                 | 15–24           |                  |       | 55–64           |                  |       | 15–24           |                  |       | 55–64           |                  |       |
| 1983–1987       | 2.4             | 22.8             | 163.4 | 4.0             | 45.2             | 106.3 | 0.4             | 6.4              | 94.1  | 2.6             | 21.8             | 110.5 |
| 1988–1992       | 1.8             | 14.7             | 148.1 | 5.0             | 47.9             | 135.0 | 1.0             | 7.7              | 145.8 | 2.4             | 20.1             | 112.5 |
| 1993–1997       | 1.0             | 12.8             | 113.5 | 5.0             | 51.5             | 128.0 | 0.4             | 5.5              | 106.3 | 0.6             | 12.0             | 75.5  |
| 1998–2002       | 1.2             | 17.4             | 110.4 | 8.6             | 94.4             | 148.5 | 0.2             | 6.3              | 89.2  | 1.8             | 20.2             | 107.4 |
| 2003–2007       | 1.4             | 20.4             | 116.7 | 9.6             | 94.8             | 164.2 | 0.2             | 7.8              | 86.5  | 2.0             | 19.2             | 115.0 |
| 2008–2012       | 0.2             | 17.7             | 83.5  | 8.2             | 66.7             | 137.4 | 0.2             | 8.8              | 90.4  | 0.4             | 11.9             | 79.6  |
|                 | 25–34           |                  |       | 65–74           |                  |       | 25–34           |                  |       | 65–74           |                  |       |
| 1983–1987       | 3.6             | 30.1             | 117.6 | 2.6             | 46.0             | 105.0 | 1.4             | 11.9             | 110.1 | 1.4             | 23.0             | 73.5  |
| 1988–1992       | 3.2             | 29.3             | 153.1 | 3.0             | 42.2             | 119.7 | 1.8             | 12.6             | 145.9 | 1.6             | 20.6             | 78.9  |
| 1993–1997       | 4.0             | 36.2             | 185.5 | 3.4             | 40.7             | 127.7 | 0.8             | 9.2              | 111.0 | 1.4             | 16.2             | 83.1  |
| 1998–2002       | 2.2             | 30.6             | 113.1 | 4.2             | 50.2             | 110.4 | 0.8             | 11.9             | 102.6 | 1.6             | 18.5             | 88.0  |
| 2003–2007       | 2.6             | 36.4             | 117.2 | 6.8             | 71.0             | 165.4 | 0.4             | 11.3             | 87.2  | 1.0             | 15.7             | 84.1  |
| 2008–2012       | 3.4             | 42.5             | 130.5 | 2.2             | 37.3             | 94.4  | 0.8             | 14.4             | 100.5 | 1.8             | 20.0             | 112.6 |
|                 | 35–44           |                  |       | >74 y/o         |                  |       | 35–44           |                  |       | >74 y/o         |                  |       |
| 1983–1987       | 4.6             | 42.8             | 134.4 | 2.2             | 71.5             | 91.2  | 1.6             | 14.1             | 119.4 | 1.4             | 28.6             | 49.6  |
| 1988–1992       | 5.6             | 40.7             | 171.7 | 3.4             | 78.5             | 121.7 | 1.0             | 10.0             | 103.3 | 1.8             | 27.6             | 57.7  |
| 1993–1997       | 3.4             | 29.6             | 120.7 | 1.8             | 43.9             | 84.3  | 1.8             | 12.3             | 144.3 | 2.0             | 24.4             | 70.8  |
| 1998–2002       | 4.8             | 46.3             | 131.6 | 2.2             | 45.5             | 86.4  | 1.4             | 12.5             | 121.1 | 1.6             | 18.3             | 58.8  |
| 2003–2007       | 4.0             | 49.2             | 122.8 | 4.4             | 59.6             | 132.4 | 1.2             | 13.9             | 109.7 | 1.6             | 15.0             | 66.9  |
| 2008–2012       | 4.0             | 46.1             | 123.9 | 3.8             | 47.6             | 114.7 | 1.6             | 16.3             | 120.0 | 2.2             | 17.2             | 89.5  |

Secondary Medical Zone ID: 340

|                 | Male            |                  |       |                 |                  |       | Female          |                  |       |                 |                  |       |
|-----------------|-----------------|------------------|-------|-----------------|------------------|-------|-----------------|------------------|-------|-----------------|------------------|-------|
|                 | Suicide         |                  |       | Suicide         |                  |       | Suicide         |                  |       | Suicide         |                  |       |
|                 | Num<br>per year | Rate<br>/100,000 | × 100 | Num<br>per year | Rate<br>/100,000 | × 100 | Num<br>per year | Rate<br>/100,000 | × 100 | Num<br>per year | Rate<br>/100,000 | × 100 |
|                 |                 |                  |       |                 |                  |       |                 |                  |       |                 |                  |       |
| Total (>10 y/o) | 45–54           | Total (>10 y/o)  | 45–54 |                 |                  |       |                 |                  |       |                 |                  |       |
| 1983–1987       | 18.6            | 39.6             | 142.6 | 3.2             | 56.1             | 111.0 | 6.0             | 14.6             | 91.4  | 1.6             | 21.2             | 122.8 |
| 1988–1992       | 17.4            | 31.8             | 157.0 | 2.8             | 43.2             | 125.9 | 5.6             | 12.5             | 91.3  | 1.8             | 19.3             | 132.1 |
| 1993–1997       | 16.8            | 31.0             | 141.8 | 3.8             | 47.5             | 129.9 | 5.2             | 11.0             | 95.0  | 0.6             | 12.8             | 98.8  |
| 1998–2002       | 22.8            | 41.3             | 130.8 | 6.4             | 71.0             | 126.9 | 5.2             | 12.0             | 88.2  | 1.4             | 16.9             | 112.3 |
| 2003–2007       | 27.0            | 45.8             | 145.0 | 8.4             | 86.7             | 155.1 | 4.8             | 12.0             | 87.2  | 0.6             | 12.4             | 90.2  |
| 2008–2012       | 23.6            | 39.6             | 131.5 | 6.4             | 69.8             | 143.5 | 7.8             | 14.0             | 110.6 | 1.8             | 18.7             | 125.5 |
|                 | 15–24           |                  |       | 55–64           |                  |       | 15–24           |                  |       | 55–64           |                  |       |
| 1983–1987       | 1.8             | 20.6             | 148.0 | 1.4             | 39.0             | 91.8  | 0.0             | 5.5              | 80.6  | 1.0             | 19.3             | 97.8  |
| 1988–1992       | 1.0             | 11.7             | 118.0 | 2.4             | 41.8             | 117.6 | 0.4             | 5.8              | 109.1 | 0.6             | 16.0             | 89.7  |
| 1993–1997       | 0.2             | 9.3              | 82.1  | 2.6             | 45.3             | 112.6 | 0.4             | 5.5              | 106.0 | 0.8             | 16.0             | 100.9 |
| 1998–2002       | 0.8             | 14.4             | 91.0  | 3.4             | 66.2             | 104.3 | 0.0             | 5.4              | 77.2  | 0.8             | 18.5             | 98.6  |
| 2003–2007       | 1.4             | 18.3             | 105.1 | 6.4             | 83.6             | 144.8 | 0.2             | 7.3              | 80.8  | 0.6             | 15.8             | 94.1  |
| 2008–2012       | 1.0             | 19.7             | 93.0  | 5.6             | 59.2             | 121.9 | 0.6             | 10.1             | 103.9 | 1.8             | 18.0             | 120.5 |
|                 | 25–34           |                  |       | 65–74           |                  |       | 25–34           |                  |       | 65–74           |                  |       |
| 1983–1987       | 5.4             | 46.2             | 180.6 | 1.0             | 39.9             | 91.0  | 2.0             | 16.6             | 154.6 | 0.2             | 19.9             | 63.7  |
| 1988–1992       | 4.4             | 40.3             | 210.6 | 1.4             | 38.6             | 109.4 | 1.6             | 13.1             | 150.6 | 0.2             | 15.7             | 60.3  |
| 1993–1997       | 3.4             | 33.9             | 173.6 | 1.6             | 36.4             | 114.2 | 0.2             | 7.3              | 87.9  | 0.0             | 11.2             | 57.7  |
| 1998–2002       | 2.6             | 33.0             | 122.1 | 2.8             | 53.3             | 117.1 | 0.4             | 10.7             | 91.9  | 0.6             | 17.7             | 84.3  |
| 2003–2007       | 2.6             | 35.1             | 113.2 | 1.4             | 37.8             | 88.0  | 1.2             | 14.8             | 113.6 | 0.6             | 16.9             | 90.6  |
| 2008–2012       | 2.8             | 37.7             | 115.7 | 2.6             | 45.8             | 115.8 | 0.8             | 14.1             | 98.6  | 0.6             | 16.9             | 94.9  |
|                 | 35–44           |                  |       | >74 y/o         |                  |       | 35–44           |                  |       | >74 y/o         |                  |       |
| 1983–1987       | 4.6             | 52.3             | 164.2 | 1.2             | 70.5             | 90.0  | 1.0             | 13.7             | 115.6 | 0.2             | 21.5             | 37.2  |
| 1988–1992       | 4.0             | 37.3             | 157.4 | 1.2             | 57.1             | 88.5  | 0.6             | 9.7              | 100.0 | 0.4             | 20.7             | 43.3  |
| 1993–1997       | 4.8             | 42.9             | 175.0 | 0.4             | 32.0             | 61.5  | 2.6             | 16.8             | 198.0 | 0.6             | 18.4             | 53.3  |
| 1998–2002       | 4.4             | 48.9             | 138.8 | 2.2             | 61.5             | 116.7 | 0.8             | 10.9             | 105.7 | 1.2             | 23.0             | 74.2  |
| 2003–2007       | 4.6             | 58.9             | 147.1 | 2.2             | 51.5             | 114.4 | 0.8             | 12.9             | 102.4 | 0.8             | 15.2             | 67.8  |
| 2008–2012       | 3.0             | 42.0             | 112.8 | 2.2             | 45.5             | 109.6 | 1.2             | 15.3             | 112.5 | 1.0             | 16.0             | 83.1  |

Secondary Medical Zone ID: 341

|                 | Male            |                  |       |                 |                  |       | Female          |                  |       |                 |                  |       |
|-----------------|-----------------|------------------|-------|-----------------|------------------|-------|-----------------|------------------|-------|-----------------|------------------|-------|
|                 | Suicide         |                  |       | Suicide         |                  |       | Suicide         |                  |       | Suicide         |                  |       |
|                 | Num<br>per year | Rate<br>/100,000 | × 100 | Num<br>per year | Rate<br>/100,000 | × 100 | Num<br>per year | Rate<br>/100,000 | × 100 | Num<br>per year | Rate<br>/100,000 | × 100 |
|                 |                 |                  |       |                 |                  |       |                 |                  |       |                 |                  |       |
| Total (>10 y/o) | 45–54           | Total (>10 y/o)  | 45–54 |                 |                  |       |                 |                  |       |                 |                  |       |
| 1983–1987       | 62.0            | 41.4             | 143.8 | 13.4            | 59.0             | 116.7 | 18.4            | 13.4             | 83.8  | 4.2             | 18.1             | 105.3 |
| 1988–1992       | 59.2            | 34.8             | 160.1 | 12.0            | 50.2             | 146.2 | 19.4            | 11.9             | 88.8  | 3.0             | 14.0             | 95.6  |
| 1993–1997       | 69.2            | 36.5             | 160.5 | 12.8            | 48.2             | 131.7 | 16.8            | 9.9              | 82.4  | 3.4             | 13.5             | 104.8 |
| 1998–2002       | 94.8            | 47.9             | 141.2 | 25.4            | 80.0             | 142.9 | 25.0            | 12.8             | 95.0  | 5.8             | 18.1             | 120.3 |
| 2003–2007       | 98.4            | 47.0             | 134.3 | 27.2            | 82.5             | 147.6 | 23.8            | 12.0             | 88.4  | 6.0             | 17.4             | 126.7 |
| 2008–2012       | 90.4            | 40.5             | 123.6 | 23.2            | 71.5             | 147.1 | 26.8            | 12.7             | 93.4  | 6.4             | 19.2             | 128.5 |
|                 | 15–24           |                  |       | 55–64           |                  |       | 15–24           |                  |       | 55–64           |                  |       |
| 1983–1987       | 9.0             | 26.2             | 187.5 | 6.0             | 48.5             | 114.0 | 1.8             | 6.5              | 95.2  | 2.8             | 19.1             | 96.6  |
| 1988–1992       | 5.4             | 14.0             | 141.2 | 8.4             | 45.6             | 128.5 | 1.6             | 5.1              | 96.8  | 2.4             | 14.8             | 83.0  |
| 1993–1997       | 3.0             | 9.6              | 85.1  | 14.8            | 63.4             | 157.6 | 1.2             | 4.2              | 80.9  | 3.8             | 16.8             | 105.7 |
| 1998–2002       | 6.0             | 17.7             | 111.9 | 17.4            | 78.4             | 123.4 | 2.0             | 6.7              | 95.2  | 3.4             | 16.8             | 89.4  |
| 2003–2007       | 4.0             | 14.6             | 83.7  | 18.6            | 74.0             | 128.2 | 2.0             | 7.5              | 83.7  | 4.2             | 17.1             | 102.3 |
| 2008–2012       | 4.6             | 17.5             | 82.3  | 17.4            | 56.1             | 115.4 | 1.6             | 6.9              | 71.5  | 5.0             | 16.3             | 109.0 |
|                 | 25–34           |                  |       | 65–74           |                  |       | 25–34           |                  |       | 65–74           |                  |       |
| 1983–1987       | 16.8            | 47.7             | 186.7 | 2.0             | 36.4             | 83.2  | 4.4             | 13.6             | 126.6 | 1.4             | 19.8             | 63.4  |
| 1988–1992       | 14.2            | 42.7             | 223.3 | 2.8             | 35.2             | 100.0 | 4.2             | 12.4             | 143.0 | 2.0             | 19.2             | 73.8  |
| 1993–1997       | 12.6            | 36.6             | 187.5 | 4.8             | 40.4             | 126.8 | 3.2             | 9.7              | 116.8 | 1.0             | 10.8             | 55.5  |
| 1998–2002       | 14.6            | 40.4             | 149.6 | 6.4             | 42.9             | 94.3  | 3.6             | 11.1             | 96.2  | 2.8             | 17.3             | 82.1  |
| 2003–2007       | 15.0            | 42.0             | 135.5 | 9.6             | 49.0             | 114.3 | 3.0             | 10.2             | 78.8  | 2.4             | 14.0             | 75.0  |
| 2008–2012       | 10.8            | 34.5             | 105.9 | 10.0            | 48.5             | 122.7 | 4.4             | 14.1             | 98.8  | 2.4             | 14.1             | 79.2  |
|                 | 35–44           |                  |       | >74 y/o         |                  |       | 35–44           |                  |       | >74 y/o         |                  |       |
| 1983–1987       | 12.6            | 46.9             | 147.2 | 2.2             | 64.3             | 82.1  | 3.2             | 12.8             | 108.6 | 0.6             | 15.4             | 26.7  |
| 1988–1992       | 14.0            | 41.6             | 175.6 | 2.4             | 52.6             | 81.5  | 4.8             | 13.7             | 141.7 | 1.4             | 17.8             | 37.3  |
| 1993–1997       | 17.4            | 49.1             | 200.2 | 3.4             | 54.1             | 104.0 | 3.2             | 9.7              | 114.6 | 0.8             | 10.2             | 29.6  |
| 1998–2002       | 23.0            | 68.3             | 193.8 | 1.8             | 32.2             | 61.1  | 5.2             | 14.7             | 142.6 | 2.2             | 16.4             | 52.8  |
| 2003–2007       | 20.0            | 61.1             | 152.5 | 4.0             | 41.0             | 90.9  | 4.6             | 13.9             | 110.1 | 1.6             | 10.5             | 46.7  |
| 2008–2012       | 17.2            | 47.3             | 127.0 | 7.0             | 47.0             | 113.2 | 5.0             | 14.1             | 104.1 | 2.0             | 10.6             | 55.3  |

Secondary Medical Zone ID: 342

|                 | Male            |                  |       |                 |                  |       | Female          |                  |       |                 |                  |       |
|-----------------|-----------------|------------------|-------|-----------------|------------------|-------|-----------------|------------------|-------|-----------------|------------------|-------|
|                 | Suicide         |                  |       | Suicide         |                  |       | Suicide         |                  |       | Suicide         |                  |       |
|                 | Num<br>per year | Rate<br>/100,000 | × 100 | Num<br>per year | Rate<br>/100,000 | × 100 | Num<br>per year | Rate<br>/100,000 | × 100 | Num<br>per year | Rate<br>/100,000 | × 100 |
|                 |                 |                  |       |                 |                  |       |                 |                  |       |                 |                  |       |
| Total (>10 y/o) | 45–54           | Total (>10 y/o)  | 45–54 |                 |                  |       |                 |                  |       |                 |                  |       |
| 1983–1987       | 80.6            | 36.9             | 120.1 | 17.0            | 50.1             | 99.0  | 26.8            | 12.4             | 77.6  | 6.2             | 17.9             | 103.6 |
| 1988–1992       | 71.2            | 29.2             | 125.7 | 14.2            | 39.7             | 115.6 | 23.4            | 10.0             | 71.2  | 3.4             | 11.5             | 78.3  |
| 1993–1997       | 83.6            | 30.7             | 128.5 | 17.4            | 42.8             | 116.9 | 28.6            | 10.3             | 89.7  | 5.0             | 13.0             | 100.3 |
| 1998–2002       | 120.2           | 41.6             | 119.3 | 31.6            | 66.3             | 118.4 | 33.2            | 11.7             | 84.4  | 6.0             | 13.8             | 91.9  |
| 2003–2007       | 123.0           | 40.2             | 112.0 | 30.0            | 61.7             | 110.4 | 35.2            | 11.8             | 86.0  | 8.4             | 16.6             | 121.1 |
| 2008–2012       | 126.8           | 38.8             | 117.5 | 26.6            | 57.5             | 118.4 | 41.0            | 12.8             | 94.8  | 9.4             | 19.2             | 128.7 |
|                 | 15–24           |                  |       | 55–64           |                  |       | 15–24           |                  |       | 55–64           |                  |       |
| 1983–1987       | 10.2            | 21.1             | 151.6 | 9.0             | 45.9             | 108.0 | 3.6             | 7.5              | 109.8 | 4.0             | 17.7             | 89.7  |
| 1988–1992       | 6.2             | 12.0             | 121.0 | 10.8            | 40.2             | 113.3 | 2.0             | 4.4              | 84.0  | 5.0             | 17.6             | 98.4  |
| 1993–1997       | 7.6             | 14.1             | 124.9 | 15.0            | 46.2             | 114.7 | 3.4             | 6.3              | 121.0 | 4.8             | 14.9             | 94.0  |
| 1998–2002       | 7.0             | 15.1             | 95.8  | 23.0            | 69.1             | 108.8 | 3.2             | 6.9              | 98.1  | 5.2             | 16.4             | 87.3  |
| 2003–2007       | 4.8             | 12.4             | 71.1  | 27.4            | 71.5             | 123.9 | 2.8             | 7.0              | 77.4  | 4.0             | 12.8             | 76.3  |
| 2008–2012       | 6.0             | 16.3             | 76.9  | 29.2            | 61.4             | 126.5 | 2.0             | 6.2              | 63.7  | 6.0             | 13.8             | 92.9  |
|                 | 25–34           |                  |       | 65–74           |                  |       | 25–34           |                  |       | 65–74           |                  |       |
| 1983–1987       | 19.0            | 35.7             | 139.6 | 5.2             | 48.6             | 111.1 | 5.8             | 11.4             | 105.4 | 1.6             | 15.5             | 49.5  |
| 1988–1992       | 15.2            | 31.2             | 163.3 | 3.8             | 31.1             | 88.3  | 4.4             | 9.2              | 106.3 | 1.8             | 13.2             | 50.6  |
| 1993–1997       | 13.6            | 28.4             | 145.2 | 5.6             | 32.6             | 102.2 | 4.8             | 9.7              | 117.1 | 3.2             | 15.3             | 78.7  |
| 1998–2002       | 18.2            | 36.1             | 133.8 | 11.4            | 48.5             | 106.6 | 7.2             | 13.8             | 119.1 | 3.4             | 14.6             | 69.5  |
| 2003–2007       | 17.8            | 35.5             | 114.6 | 12.2            | 43.4             | 101.1 | 6.0             | 12.2             | 94.2  | 3.4             | 12.9             | 69.5  |
| 2008–2012       | 17.4            | 37.4             | 114.8 | 15.2            | 49.7             | 125.7 | 6.6             | 14.2             | 99.0  | 5.2             | 16.7             | 93.7  |
|                 | 35–44           |                  |       | >74 y/o         |                  |       | 35–44           |                  |       | >74 y/o         |                  |       |
| 1983–1987       | 17.4            | 41.1             | 129.0 | 2.4             | 51.6             | 65.9  | 4.0             | 10.7             | 90.6  | 1.6             | 18.8             | 32.5  |
| 1988–1992       | 17.6            | 34.1             | 143.9 | 3.2             | 47.4             | 73.5  | 5.2             | 10.6             | 110.1 | 1.4             | 12.8             | 26.8  |
| 1993–1997       | 20.4            | 38.9             | 158.7 | 4.0             | 44.5             | 85.4  | 5.4             | 10.4             | 122.8 | 2.0             | 12.6             | 36.6  |
| 1998–2002       | 24.2            | 50.3             | 142.9 | 4.8             | 43.0             | 81.5  | 5.8             | 11.9             | 115.6 | 2.0             | 10.8             | 34.9  |
| 2003–2007       | 23.0            | 48.5             | 121.0 | 7.8             | 48.6             | 107.9 | 7.0             | 14.2             | 112.5 | 3.4             | 12.7             | 56.5  |
| 2008–2012       | 22.4            | 43.0             | 115.6 | 9.8             | 45.4             | 109.5 | 7.4             | 14.2             | 105.0 | 3.8             | 12.0             | 62.6  |

Secondary Medical Zone ID: 343

|                 | Male            |                  |       |                 |                  |       | Female          |                  |       |                 |                  |       |
|-----------------|-----------------|------------------|-------|-----------------|------------------|-------|-----------------|------------------|-------|-----------------|------------------|-------|
|                 | Suicide         |                  |       | Suicide         |                  |       | Suicide         |                  |       | Suicide         |                  |       |
|                 | Num<br>per year | Rate<br>/100,000 | × 100 | Num<br>per year | Rate<br>/100,000 | × 100 | Num<br>per year | Rate<br>/100,000 | × 100 | Num<br>per year | Rate<br>/100,000 | × 100 |
|                 |                 |                  |       |                 |                  |       |                 |                  |       |                 |                  |       |
| Total (>10 y/o) | 45–54           | Total (>10 y/o)  | 45–54 |                 |                  |       |                 |                  |       |                 |                  |       |
| 1983–1987       | 7.8             | 32.8             | 104.2 | 1.2             | 44.4             | 87.8  | 1.2             | 12.7             | 63.6  | 0.0             | 14.0             | 81.3  |
| 1988–1992       | 8.0             | 26.9             | 124.0 | 1.0             | 34.1             | 99.3  | 1.2             | 11.0             | 65.5  | 0.2             | 13.7             | 93.6  |
| 1993–1997       | 5.8             | 24.9             | 97.3  | 1.4             | 38.4             | 104.9 | 1.6             | 9.8              | 76.6  | 0.0             | 11.2             | 86.9  |
| 1998–2002       | 12.6            | 39.4             | 124.5 | 2.0             | 53.5             | 95.7  | 2.0             | 11.7             | 80.5  | 0.4             | 14.4             | 95.6  |
| 2003–2007       | 9.8             | 36.4             | 103.2 | 2.4             | 54.5             | 97.4  | 1.0             | 11.3             | 73.1  | 0.0             | 11.2             | 81.4  |
| 2008–2012       | 11.8            | 36.8             | 120.0 | 3.0             | 57.9             | 119.2 | 2.6             | 12.4             | 92.2  | 0.4             | 14.0             | 94.0  |
|                 | 15–24           |                  |       | 55–64           |                  |       | 15–24           |                  |       | 55–64           |                  |       |
| 1983–1987       | 0.6             | 14.9             | 106.5 | 1.4             | 44.1             | 103.8 | 0.0             | 5.8              | 85.4  | 0.2             | 16.4             | 82.9  |
| 1988–1992       | 0.8             | 12.1             | 122.3 | 1.2             | 35.6             | 100.3 | 0.2             | 5.5              | 104.0 | 0.0             | 14.1             | 79.2  |
| 1993–1997       | 0.0             | 9.8              | 86.6  | 1.0             | 37.6             | 93.5  | 0.4             | 6.2              | 119.3 | 0.2             | 13.9             | 87.6  |
| 1998–2002       | 1.2             | 19.7             | 125.0 | 1.2             | 56.0             | 88.1  | 0.0             | 6.2              | 88.2  | 0.2             | 17.2             | 91.4  |
| 2003–2007       | 0.2             | 16.1             | 92.3  | 2.4             | 64.1             | 111.0 | 0.2             | 8.9              | 98.9  | 0.2             | 15.5             | 92.4  |
| 2008–2012       | 0.2             | 19.6             | 92.5  | 3.6             | 60.9             | 125.4 | 0.0             | 8.5              | 87.5  | 0.8             | 15.9             | 106.4 |
|                 | 25–34           |                  |       | 65–74           |                  |       | 25–34           |                  |       | 65–74           |                  |       |
| 1983–1987       | 1.6             | 28.6             | 112.1 | 0.8             | 43.6             | 99.5  | 0.4             | 10.3             | 95.4  | 0.2             | 23.8             | 76.2  |
| 1988–1992       | 1.4             | 24.9             | 130.2 | 0.6             | 33.7             | 95.6  | 0.4             | 9.0              | 104.0 | 0.2             | 19.3             | 74.0  |
| 1993–1997       | 0.2             | 16.7             | 85.3  | 0.8             | 31.8             | 99.6  | 0.2             | 8.1              | 97.8  | 0.2             | 15.2             | 78.1  |
| 1998–2002       | 1.8             | 33.9             | 125.6 | 1.2             | 43.9             | 96.5  | 0.4             | 11.9             | 103.0 | 0.4             | 18.6             | 88.6  |
| 2003–2007       | 1.0             | 31.5             | 101.6 | 1.6             | 47.0             | 109.6 | 0.2             | 12.1             | 92.8  | 0.0             | 14.8             | 79.4  |
| 2008–2012       | 1.0             | 33.0             | 101.4 | 1.4             | 43.1             | 109.0 | 0.4             | 14.2             | 99.1  | 0.4             | 17.5             | 98.4  |
|                 | 35–44           |                  |       | >74 y/o         |                  |       | 35–44           |                  |       | >74 y/o         |                  |       |
| 1983–1987       | 1.2             | 33.3             | 104.7 | 1.0             | 83.1             | 106.1 | 0.2             | 11.1             | 94.2  | 0.2             | 30.2             | 52.4  |
| 1988–1992       | 1.6             | 28.8             | 121.5 | 1.4             | 78.3             | 121.4 | 0.2             | 9.0              | 93.3  | 0.0             | 21.1             | 44.0  |
| 1993–1997       | 1.4             | 27.2             | 110.8 | 1.0             | 56.3             | 108.2 | 0.2             | 7.8              | 91.4  | 0.4             | 23.2             | 67.5  |
| 1998–2002       | 3.6             | 55.3             | 157.0 | 1.6             | 65.1             | 123.5 | 0.4             | 10.4             | 100.1 | 0.2             | 17.7             | 57.1  |
| 2003–2007       | 0.8             | 33.6             | 83.9  | 1.4             | 50.5             | 112.1 | 0.2             | 11.7             | 92.4  | 0.2             | 13.6             | 60.5  |
| 2008–2012       | 1.2             | 37.4             | 100.5 | 1.4             | 44.6             | 107.4 | 0.2             | 12.7             | 93.5  | 0.4             | 15.2             | 79.0  |



Secondary Medical Zone ID: 344

|           | Male            |                  |       |                 |                  |       | Female          |                  |       |                 |                  |       |
|-----------|-----------------|------------------|-------|-----------------|------------------|-------|-----------------|------------------|-------|-----------------|------------------|-------|
|           | Suicide         |                  |       | Suicide         |                  |       | Suicide         |                  |       | Suicide         |                  |       |
|           | Num<br>per year | Rate<br>/100,000 | × 100 | Num<br>per year | Rate<br>/100,000 | × 100 | Num<br>per year | Rate<br>/100,000 | × 100 | Num<br>per year | Rate<br>/100,000 | × 100 |
|           |                 |                  |       |                 |                  |       |                 |                  |       |                 |                  |       |
|           | Total (>10 y/o) |                  |       | 45–54           |                  |       | Total (>10 y/o) |                  |       | 45–54           |                  |       |
| 1983–1987 | 6.2             | 33.0             | 104.9 | 1.4             | 51.2             | 101.3 | 1.2             | 13.7             | 76.6  | 0.4             | 17.0             | 98.9  |
| 1988–1992 | 7.2             | 27.5             | 131.9 | 1.6             | 42.3             | 123.1 | 1.0             | 11.5             | 74.2  | 0.0             | 13.1             | 89.7  |
| 1993–1997 | 7.6             | 27.7             | 128.3 | 0.8             | 34.6             | 94.5  | 1.2             | 10.0             | 80.6  | 0.0             | 11.5             | 88.8  |
| 1998–2002 | 8.0             | 36.9             | 101.9 | 2.2             | 56.8             | 101.5 | 2.8             | 12.6             | 97.6  | 0.6             | 15.6             | 103.7 |
| 2003–2007 | 10.8            | 39.1             | 117.7 | 3.6             | 70.8             | 126.7 | 4.0             | 12.9             | 109.8 | 0.4             | 13.3             | 96.9  |
| 2008–2012 | 12.0            | 38.1             | 123.3 | 5.2             | 78.4             | 161.3 | 2.8             | 12.5             | 96.2  | 0.4             | 14.3             | 96.1  |
|           | 15–24           |                  |       | 55–64           |                  |       | 15–24           |                  |       | 55–64           |                  |       |
| 1983–1987 | 0.2             | 12.7             | 91.2  | 0.2             | 34.2             | 80.5  | 0.2             | 6.9              | 101.5 | 0.0             | 16.3             | 82.7  |
| 1988–1992 | 0.4             | 10.6             | 107.4 | 1.0             | 37.4             | 105.4 | 0.2             | 5.6              | 105.7 | 0.2             | 16.3             | 91.5  |
| 1993–1997 | 0.6             | 12.7             | 112.3 | 2.2             | 53.2             | 132.1 | 0.0             | 4.7              | 89.5  | 0.6             | 17.4             | 109.5 |
| 1998–2002 | 0.0             | 13.4             | 85.1  | 1.8             | 67.6             | 106.5 | 0.2             | 7.1              | 101.0 | 0.4             | 18.7             | 99.6  |
| 2003–2007 | 1.0             | 20.7             | 118.5 | 1.4             | 54.7             | 94.8  | 0.2             | 8.9              | 98.5  | 0.6             | 17.6             | 105.1 |
| 2008–2012 | 0.6             | 22.1             | 104.1 | 1.6             | 46.4             | 95.4  | 0.0             | 8.4              | 86.7  | 0.6             | 15.4             | 103.0 |
|           | 25–34           |                  |       | 65–74           |                  |       | 25–34           |                  |       | 65–74           |                  |       |
| 1983–1987 | 2.2             | 34.2             | 133.8 | 0.2             | 37.4             | 85.4  | 0.2             | 9.6              | 89.4  | 0.0             | 24.3             | 77.7  |
| 1988–1992 | 1.4             | 25.5             | 133.3 | 1.2             | 45.8             | 129.9 | 0.0             | 7.3              | 84.6  | 0.4             | 24.9             | 95.6  |
| 1993–1997 | 0.0             | 15.2             | 78.0  | 0.6             | 32.5             | 101.8 | 0.4             | 9.0              | 107.9 | 0.2             | 17.0             | 87.2  |
| 1998–2002 | 0.4             | 24.0             | 88.9  | 0.4             | 39.5             | 86.9  | 0.8             | 13.4             | 115.4 | 0.0             | 16.7             | 79.6  |
| 2003–2007 | 0.6             | 27.2             | 87.6  | 1.2             | 46.7             | 108.7 | 0.8             | 14.4             | 110.8 | 0.4             | 18.4             | 98.9  |
| 2008–2012 | 1.4             | 34.2             | 105.0 | 1.2             | 43.5             | 110.0 | 0.0             | 11.8             | 82.4  | 0.8             | 20.2             | 113.5 |
|           | 35–44           |                  |       | >74 y/o         |                  |       | 35–44           |                  |       | >74 y/o         |                  |       |
| 1983–1987 | 1.8             | 39.8             | 125.1 | 0.2             | 65.3             | 83.3  | 0.2             | 11.4             | 96.4  | 0.2             | 42.0             | 72.9  |
| 1988–1992 | 1.0             | 24.4             | 103.1 | 0.6             | 65.1             | 100.9 | 0.0             | 8.4              | 87.1  | 0.2             | 33.5             | 70.0  |
| 1993–1997 | 2.6             | 38.3             | 156.2 | 0.8             | 59.1             | 113.5 | 0.0             | 7.0              | 82.8  | 0.0             | 19.9             | 57.9  |
| 1998–2002 | 2.8             | 49.4             | 140.1 | 0.4             | 46.5             | 88.2  | 0.4             | 10.5             | 102.0 | 0.4             | 25.6             | 82.6  |
| 2003–2007 | 1.8             | 44.8             | 111.7 | 1.2             | 53.9             | 119.7 | 0.4             | 12.5             | 99.2  | 1.2             | 31.0             | 138.0 |
| 2008–2012 | 1.2             | 36.2             | 97.2  | 0.8             | 42.0             | 101.3 | 0.8             | 14.8             | 109.4 | 0.2             | 15.2             | 79.2  |
